# Supplementary material for: Sulfamides direct radical-mediated chlorination of aliphatic C–H bonds
Source: PubMed Central journal article supplement (PMC8132995; doi:10.1039/c9sc03428e), 2019-11-08
Supplement: SC-011-C9SC03428E-s001.pdf [file SC-011-C9SC03428E-s001.pdf]

## Supporting Information

### **Sulfamides Direct Radical-Mediated Chlorination of Aliphatic C–H Bonds**

M. A. Short, M. F. Shehata, M. A. Sanders, and J. L. Roizen\*

*Department of Chemistry, Duke University, Durham, NC 27708-0354*

#### **Table of Contents:**

|              |                                                                                               |             |
|--------------|-----------------------------------------------------------------------------------------------|-------------|
| <b>I.</b>    | <b>General considerations.</b>                                                                | <b>S2</b>   |
| <b>II.</b>   | <b>Reaction optimization.</b>                                                                 | <b>S5</b>   |
| <b>III.</b>  | <b>Experimental procedures.</b>                                                               | <b>S6</b>   |
| <b>IV.</b>   | <b>Preparation and characterization of sulfamides.</b>                                        | <b>S13</b>  |
| <b>V.</b>    | <b>Preparation and characterization of diversified sulfamides.</b>                            | <b>S16</b>  |
| <b>VI.</b>   | <b>Preparation and characterization of <i>N</i>-chlorosulfamides.</b>                         | <b>S27</b>  |
| <b>VII.</b>  | <b>Preparation and characterization of <math>\gamma</math>-chlorinated sulfamides.</b>        | <b>S37</b>  |
| <b>VIII.</b> | <b>Preparation and characterization of non-<math>\gamma</math>-chlorinated sulfamides.</b>    | <b>S49</b>  |
| <b>IX.</b>   | <b>Preparation and characterization of sulfamate ester derivatives.</b>                       | <b>S52</b>  |
| <b>X.</b>    | <b>Sulfamide cleavage to access 3-chloroalkylamines.</b>                                      | <b>S58</b>  |
| <b>XI.</b>   | <b>Preparation and characterization of compounds related to the radical clock experiment.</b> | <b>S59</b>  |
| <b>XII.</b>  | <b>Description of quantum yield experiment.</b>                                               | <b>S61</b>  |
| <b>XIII.</b> | <b>UV-Vis spectra.</b>                                                                        | <b>S64</b>  |
| <b>XIV.</b>  | <b>S–N bond lengths in related sulfamides.</b>                                                | <b>S66</b>  |
| <b>XV.</b>   | <b>Computational calculations.</b>                                                            | <b>S68</b>  |
| <b>XVI.</b>  | <b>References.</b>                                                                            | <b>S122</b> |
| <b>XVII.</b> | <b>NMR spectra.</b>                                                                           | <b>S125</b> |

## I. General considerations.

### Reagents.

All reagents and chemicals were obtained commercially and used without further purification unless otherwise noted.

|                   |                                                                                                                                                                                                                                                                                                     |
|-------------------|-----------------------------------------------------------------------------------------------------------------------------------------------------------------------------------------------------------------------------------------------------------------------------------------------------|
| Acros             | sulfur trioxide pyridine complex, 1,10-phenanthroline, potassium oxalate monohydrate, trimethylacetyl chloride, 1-hexanol, <i>tert</i> -butylamine                                                                                                                                                  |
| Alfa Aesar        | oxone, triphenylphosphine                                                                                                                                                                                                                                                                           |
| Ark Pharm         | 4-(trifluoromethyl)hydrocinnamic acid                                                                                                                                                                                                                                                               |
| BDH               | ammonium hydroxide solution (28% w/w NH <sub>3</sub> in H <sub>2</sub> O)                                                                                                                                                                                                                           |
| BTC Chemicals     | trimethylacetonitrile                                                                                                                                                                                                                                                                               |
| Chem Impex        | di <i>tert</i> -butyl pyrocarbonate, iron(III) chloride hexahydrate, 2-iodobenzoic acid                                                                                                                                                                                                             |
| Clorox            | aqueous sodium hypochlorite solution (bleach, 8.25%)                                                                                                                                                                                                                                                |
| EMD Millipore     | benzene (anhydrous, PhH)                                                                                                                                                                                                                                                                            |
| Fisher Scientific | acetonitrile (ACS grade), hexanes, sodium sulfate (anhydrous), magnesium sulfate (anhydrous)                                                                                                                                                                                                        |
| Fluka             | hydrogen bromides solution (32% in acetic acid)                                                                                                                                                                                                                                                     |
| Oakwood Chemical  | 2,2,2-trifluoroethylamine, triethylamine, trifluoroacetic anhydride, trifluoromethanesulfonic anhydride, trifluoroacetic acid, triphenylphosphine oxide, trichloroisocyanuric acid (TCICA), phthalimide, chlorosulfonyl isocyanate, 1,1'-carbonyldiimidazole (CDI), hexylamine, 2-cyclohexylethanol |
| Sigma-Aldrich     | hydrochloric acid (concentrated), lithium aluminium hydride, 4-dimethylaminopyridine (DMAP), <i>tert</i> -butylamine, 4-aminobutyric acid, 3,7-dimethyloctan-1-ol, <i>tert</i> -butanol, 1,1'-carbonyldiimidazole (CDI), ethyl acetate (EtOAc), diethyl azidocarboxylate, acetic anhydride          |
| TCI               | amylamine, isopentylamine (isoamylamine)                                                                                                                                                                                                                                                            |
| Soap Goods        | sodium acetate (anhydrous), sodium hydroxide (pellets)                                                                                                                                                                                                                                              |

Anhydrous 1,4-dioxane, tetrahydrofuran (THF), dichloromethane (CH<sub>2</sub>Cl<sub>2</sub>), and diethyl ether (Et<sub>2</sub>O) were obtained from Sigma Aldrich and were purified, dried, and degassed by passage through two columns of neutral, activated alumina under N<sub>2</sub> using an Innovative Technologies solvent purification system. Anhydrous toluene was purified, dried, and degassed by passage through a column containing copper followed by a column of neutral, activated alumina under N<sub>2</sub> using an Innovative Technologies solvent purification system. Triethylamine (Et<sub>3</sub>N) was distilled from CaH<sub>2</sub> and stored in a Schlenk flask for future use.

## Preparation of Known Reagents.

*Tert*-butyl hypochlorite,<sup>1</sup> potassium ferrioxalate trihydrate,<sup>2</sup> triethylammonium sulfamate salts,<sup>3</sup> neopentylamine,<sup>4</sup> methyl 6-aminohexanoate hydrochloride,<sup>5</sup> 4-chloropentanol,<sup>6</sup> *tert*-butyl 4-aminobutyrate,<sup>7</sup> (*R*)-methyl-2-amino-4-methylpentanoate hydrochloride,<sup>8</sup> (*S*)-2-(1-hydroxy-3-methylbutan-2-yl)isoindoline-1,3-dione,<sup>9</sup> 2-chloro-4-methylpentanol,<sup>10</sup> *N*-(*tert*-butyl)-*N'*-(2,2,2-trifluoroethyl)sulfamide,<sup>11</sup> and 3-(2,2-dimethylcyclopropyl)propan-1-ol<sup>12</sup> were prepared according to the literature and stored at  $-20\text{ }^{\circ}\text{C}$ .

## Procedures.

Moisture-sensitive reactions were performed using flame-dried glassware under an atmosphere of dry nitrogen ( $\text{N}_2$ ). Where noted, air- and water-sensitive reactions were performed in an MBraun MB200 glovebox held under an atmosphere of nitrogen gas (working pressure 2–6 mbar). Flame-dried equipment was stored in a  $130\text{ }^{\circ}\text{C}$  oven before use and either allowed to cool in a cabinet dessicator or assembled hot and allowed to cool under an inert atmosphere. Air- and moisture-sensitive liquids and solutions were transferred *via* plastic or glass syringe. Chromatographic purification of products was accomplished using Silicycle Silica flash F60 (particle size 40–63  $\mu\text{m}$ , 230–400 mesh), Teledyne Isco CombiFlashRf system using 12–220 g Redi Sep Rf normal phase silica columns (particle size 40–63  $\mu\text{m}$  irregular, 230–400 mesh), or Alfa Aesar Florisil (100–200 mesh). Thin layer chromatography was performed on EMD Millipore silica gel 60 F254 glass-backed plates (layer thickness 250  $\mu\text{m}$ , particle size 10–12  $\mu\text{m}$ , impregnated with a fluorescent indicator). Visualization of the developed chromatogram was accomplished by fluorescence quenching under shortwave UV light and/or by staining with *p*-anisaldehyde or  $\text{KMnO}_4$  stains. Unless otherwise noted, room temperature is  $22\text{ }^{\circ}\text{C}$ .

## Instrumentation.

### *NMR Spectrometry*

NMR spectra were obtained on Varian iNOVA spectrometers operating at 400 or 500 MHz for  $^1\text{H}$  NMR, 101 or 126 MHz for  $^{13}\text{C}$  NMR, and 376 MHz for  $^{19}\text{F}$  NMR at  $23\text{--}25\text{ }^{\circ}\text{C}$ , and are reported as chemical shifts ( $\delta$ ) in parts per million (ppm). Spectra were referenced internally according to residual solvent signals ( $^1\text{H}$ :  $\text{CDCl}_3$ , 7.26 ppm;  $\text{C}_6\text{D}_6$ , 7.16 ppm;  $\text{CD}_3\text{CN}$ , 1.94;  $^{13}\text{C}$ :  $\text{CDCl}_3$ , 77.0 ppm;  $\text{C}_6\text{D}_6$ , 128.0;  $\text{CD}_3\text{CN}$ , 1.3, 118.3 ppm). Data for NMR spectra use the following abbreviations to describe multiplicity: s, singlet; br s, broad singlet; d, doublet; t, triplet; q, quartet; dd, doublet of doublets; td, triplet of doublets; ddd, doublet of doublet of doublets; ddt, doublet of doublet of triplets; app dd, apparent doublet of doublets; ABq, AB system quartet; m, multiplet. Coupling constant ( $J$ ) are reported in units of Hertz (Hz).

### *IR Spectroscopy*

IR spectra were obtained on a Nicolet 6700 FT-IR system. Peaks are reported in  $\text{cm}^{-1}$  with indicated relative intensities: s (strong, 0–33% T); m (medium, 34–66% T); w (weak, 67–100% T); and br (broad).

## *Supporting Information for Sulfamides Direct Radical-Mediated Chlorination*

### *Mass Spectrometry*

High resolution mass spectra (HRMS, m/z) were recorded on an Agilent LCMS-TOF-DART spectrometer using electrospray ionization (ESI, Duke University Department of Chemistry Instrumentation Center).

### *UV-Vis Spectroscopy*

UV-vis spectra were obtained on an Agilent Cary 50 UV-Vis Spectrophotometer.

### *Light Source*

- Southern New England Ultraviolet Co. RPR-100 Photochemical Reactor

Lamp: 35W RPR-2537A

Emission wavelength: 254 nm

Reactor Barrel Dimensions: 10" diameter, 15" depth

Power supply: 110/120V AC (Input), 50/60 Hz Cycle

Power usage: ~400W

<https://rayonet.org/reactors.php?part=RPR-100>

## II. Optimization of Sulfamide-Guided Chlorine-Transfer.

### General Procedure for Optimization.

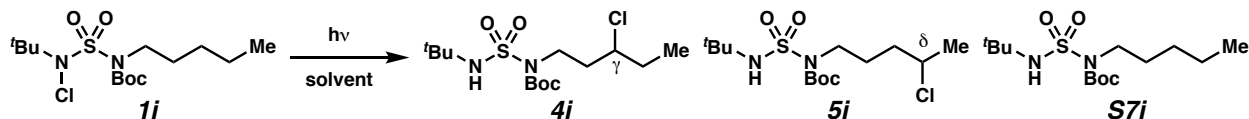

A flame-dried 1 dram vial equipped with a stir bar was charged with chlorosulfamide **1i** (11 mg, 0.03 mmol, 1.0 equiv). The vial was transferred to a nitrogen-filled glovebox where it was charged with anhydrous solvent (0.75 mL, 0.04 M or 0.3 mL, 0.1 M). The vial was sealed with a Teflon lined screw cap and removed from the glovebox. The vial was placed on a stir plate and irradiated for the reported time by the light source as described below.

Upon completion of the reaction, the solution was concentrated under reduced pressure and 1,2,4,5-tetrachloro-3-nitrobenzene (0.6 mL, 7.8 mg, 0.03 mmol, 1.0 equiv) was added from a stock solution (0.05 M). The crude was analyzed by  $^1\text{H}$  NMR with 25 second relaxation delay and the yields were calculated.

**Table S1. Optimization of reaction solvent and light source.**

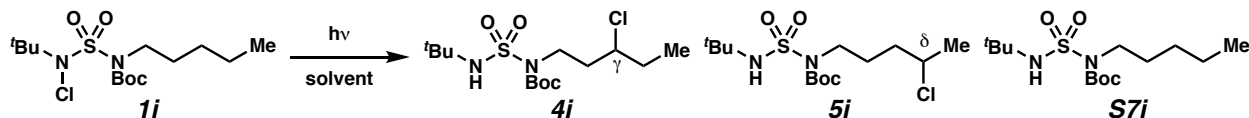

| entry                | solvent            | light source      | time          | yield <b>4i</b> <sup>b</sup> | yield <b>5i</b> <sup>b</sup> | yield <b>S7i</b> <sup>b</sup> |
|----------------------|--------------------|-------------------|---------------|------------------------------|------------------------------|-------------------------------|
| 1 <sup>c</sup>       | PhH                | CFL lamps         | 2 h           | 55%                          | 20%                          | 23%                           |
| 2                    | PhH                | CFL lamps         | 2 h           | 65%                          | 13%                          | 17%                           |
| 3 <sup>c</sup>       | PhH                | Kessil lamps      | 1 h           | 60%                          | 16%                          | 20%                           |
| 4                    | PhH                | Kessil lamps      | 1 h           | 56%                          | 16%                          | 20%                           |
| 5 <sup>c</sup>       | PhH                | UV reactor        | 15 min        | 65%                          | 12%                          | 15%                           |
| <b>6<sup>d</sup></b> | <b>PhH</b>         | <b>UV reactor</b> | <b>15 min</b> | <b>88%</b>                   | <b>10%</b>                   | <b>4%</b>                     |
| 7                    | MeCN               | UV reactor        | 15 min        | 85%                          | 9%                           | 7%                            |
| 8                    | <sup>i</sup> PrOAc | UV reactor        | 15 min        | 85%                          | 9%                           | 8%                            |
| 9                    | PhCl               | UV reactor        | 15 min        | 61%                          | 14%                          | 19%                           |
| 10                   | PhCF <sub>3</sub>  | UV reactor        | 15 min        | 78%                          | 9%                           | 6%                            |

<sup>a</sup>Reactions performed on 0.03 mmol scale at 0.04 M in the listed solvent unless otherwise noted.

<sup>b</sup>Yields from  $^1\text{H}$  NMR of crude reaction mixture with 1,2,4,5-tetrachloro-3-nitrobenzene (1.0 equiv) added as an internal standard. <sup>c</sup>Performed at 0.1 M. <sup>d</sup>Reported as an average of two runs.

### III. Experimental Procedures.

#### Preparation of 4-Chlorohexanol (S1)

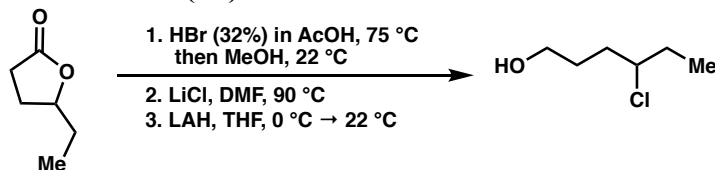

Inspired by a procedure reported by Alexanian and coworkers,<sup>6</sup> a flame-dried round bottom flask was charged with  $\gamma$ -valerolactone (2.2 mL, 20.0 mmol, 1.0 equiv) and hydrogen bromide solution (32% in acetic acid, 5 mL, 27 mmol, 1.4 equiv). The flask was fitted with a reflux condenser with rubber septum and nitrogen inlet and heated in an oil bath set at 75 °C for 4 h. After this time, the flask was removed from the heat and allowed to cool to room temperature. Once cooled, freshly distilled methanol (8.0 mL, 2.5 M) was added and the reaction was stirred at 22 °C for 16 h. After 16 h, the reaction was partially concentrated under reduced pressure (to remove methanol) and taken up in EtOAc (10 mL). The mixture was then transferred to a separatory funnel, rinsing the flask with EtOAc to achieve quantitative transfer. The organic phase was washed three times with saturated aqueous NaHCO<sub>3</sub> (3 x 25 mL) and once with brine (25 mL). The organic phase was dried with MgSO<sub>4</sub>, filtered, and concentrated under reduced pressure. The crude bromoester was used in the next step without further purification.

The crude bromoester was taken up in anhydrous DMF (13 mL) and LiCl (1.67 g, 39.3 mmol, 2.0 equiv) was added in a single portion. The flask was fitted with a Vigreux column with rubber septum and nitrogen inlet and heated in an oil bath set at 90 °C for 18 h. After 18 h, the reaction flask was removed from the heat and allowed to cool to room temperature. Once cool, the reaction was diluted with Et<sub>2</sub>O (30 mL) and 1 M HCl (30 mL). The biphasic mixture was transferred to a separatory funnel, rinsing the flask with Et<sub>2</sub>O to achieve quantitative transfer. The aqueous phase was removed and the organic phase was washed twice more with 1 M HCl (2 x 30 mL) and once with brine (30 mL). The organic phase was dried with MgSO<sub>4</sub>, filtered, and concentrated under reduced pressure. The crude chloroester was used in the next step without purification.

The crude chloroester was added dropwise to a suspension of lithium aluminum hydride (797 mg, 21.0 mmol, 1.1 equiv) in Et<sub>2</sub>O (45 mL, 2.3 M) that had been cooled at 0 °C in an ice water bath. The reaction was left to stir at 0 °C for 30 minutes and then heated to reflux overnight. After refluxing overnight, the flask was again cooled to 0 °C, and the reaction was carefully quenched by sequential dropwise addition of H<sub>2</sub>O (0.8 mL), 15% aqueous NaOH (0.8 mL), and H<sub>2</sub>O (0.8 mL). The resulting suspension was filtered by vacuum filtration through a pad of celite in a glass fritted funnel. The filtrate was concentrated under reduced pressure and then purified by silica gel flash chromatography by dry loading the sample and eluting with hexanes:EtOAc (Gradient: 100% hexanes  $\rightarrow$  9:1 hexanes/EtOAc) to yield the desired product as a colorless oil (390 mg, 14% yield over 3 steps).

<sup>1</sup>H NMR (400 MHz, CDCl<sub>3</sub>)  $\delta$  3.88 (tt,  $J$  = 4.4 Hz, 8.3 Hz, 1H), 3.69 (t,  $J$  = 6.0 Hz, 2H), 1.91–1.66 (m, 6H), 1.44 (br s, 1H), 1.03 (t,  $J$  = 7.3 Hz, 3H).

<sup>13</sup>C NMR (126 MHz, CDCl<sub>3</sub>)  $\delta$  65.5, 62.2, 34.3, 31.5, 29.6, 10.9.

IR (neat)  $\nu$  3326 (br), 2940 (m), 2877 (m), 1456 (m), 1381 (m), 1310 (m), 1236 (m), 1173 (w), 1059 (s), 921 (s), 896 (m), 803 (m), 734 (m), 658 (m), 603 (s)  $\text{cm}^{-1}$ .

TLC  $R_f$  = 0.21 in 4:1 hexanes:EtOAc

HRMS (ESI)  $m/z$ :  $[M + H - H_2O]^+$  Calcd for  $\text{C}_6\text{H}_{13}\text{ClO}$  119.0622; Found 119.0621.

### Preparation of 3,7-Dimethyloctanoic acid (S2h).

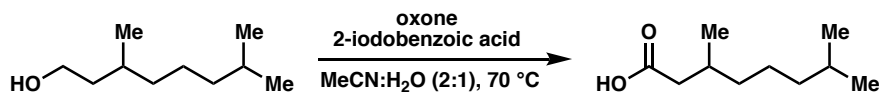

Following a modified literature procedure,<sup>13</sup> a round-bottom flask with stir bar was charged with 3,7-dimethyloctanol (6.0 mL, 31.4 mmol, 1.0 equiv) without taking any precautions to exclude air or moisture. The flask was charged with acetonitrile (285 mL, 0.11 M) and deionized water (143 mL, 0.22 M), followed by 2-iodobenzoic acid (2.34 g, 9.4 mmol, 0.3 equiv) and then oxone (25.13 g, 40.8 mmol, 1.3 equiv), each in single portions. The reaction flask was fitted with a reflux condenser and heated in an oil bath at 70 °C overnight (16 h) open to air.

After heating overnight, the flask was removed from the oil bath and allowed to cool to room temperature. Once cool, the solid material was removed by vacuum filtration using a Büchner funnel, and the filter cake was rinsed with additional acetonitrile (ca. 100 mL). The filtrate was concentrated under reduced pressure to remove acetonitrile. The remaining aqueous phase was extracted with  $\text{CH}_2\text{Cl}_2$  (3 x ca. 200 mL). The combined organic phases were dried over  $\text{Na}_2\text{SO}_4$ , filtered, and concentrated under reduced pressure. The crude material was purified by silica gel flash chromatography by dry loading the sample and eluting with hexanes:EtOAc (9:1 hexanes/EtOAc) to yield the desired product as a colorless oil (3.78 g, 70% yield).

The characterization data for this compound were in agreement with previously published information.<sup>14</sup>

$^1\text{H}$  NMR (400 MHz,  $\text{CDCl}_3$ )  $\delta$  2.36 (dd,  $J$  = 14.9 Hz, 5.9 Hz, 1H), 2.14 (dd,  $J$  = 14.9 Hz, 8.2 Hz, 1H), 2.00–1.92 (m, 1H), 1.53 (heptet,  $J$  = 6.6 Hz, 1H), 1.33–1.13 (m, 6H), 0.97 (d,  $J$  = 6.6 Hz, 3H), 0.87 (d,  $J$  = 6.6 Hz, 6H).

TLC  $R_f$  = 0.27 in 9:1 hexanes:EtOAc

### General Procedure A: Preparation of amides from carboxylic acids.

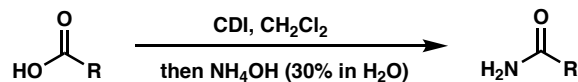

A flame-dried flask with stir bar was charged with carboxylic acid (1.0 equiv) and fitted with a rubber septum. The flask was evacuated and backfilled with  $\text{N}_2$ . ACS grade  $\text{CH}_2\text{Cl}_2$  (0.3 M) was added via syringe. Carbonyl diimidazole (CDI, 1.25 equiv) was then added by briefly removing the septum and adding the solid as a single portion. The reaction was left to stir at 22 °C for 1 h. After 1 h, the reaction flask was cooled at 0 °C in an ice water bath and aqueous  $\text{NH}_4\text{OH}$  (30%) (3.6 equiv) was added via syringe. Following  $\text{NH}_4\text{OH}$  addition, the reaction was allowed to slowly warm to room temperature by not removing the ice bath and stirred overnight.

After stirring overnight, the biphasic suspension was transferred to a separatory funnel and diluted with deionized H<sub>2</sub>O (ca. amount of CH<sub>2</sub>Cl<sub>2</sub>). The reaction flask was rinsed with an additional 5 mL CH<sub>2</sub>Cl<sub>2</sub> to ensure quantitative transfer. The organic phase was removed and the aqueous was extracted twice more with CH<sub>2</sub>Cl<sub>2</sub>. The combined organic phases were dried over Na<sub>2</sub>SO<sub>4</sub>, filtered, and concentrated under reduced pressure. The crude material was purified by silica gel flash chromatography eluting with a CH<sub>2</sub>Cl<sub>2</sub>:EtOAc solvent system as noted below.

### 2-Cyclopentylacetamide (S3d)

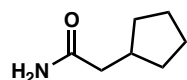

Prepared from cyclopentylacetic acid (0.96 g, 7.5 mmol, 1.0 equiv), CDI (1.52 g, 9.4 mmol, 1.25 equiv), and aq NH<sub>4</sub>OH (3.5 mL, 26.0 mmol, 3.6 equiv) following general procedure A. The product was obtained as a white solid (763 mg, 80% yield) following silica gel column chromatography (1:1 CH<sub>2</sub>Cl<sub>2</sub>:EtOAc).

<sup>1</sup>H NMR (400 MHz, CDCl<sub>3</sub>) δ 5.85 (br s, 1H), 5.53 (br s, 1H), 2.24–2.15 (m, 3H), 1.87–1.82 (m, 2H), 1.64–1.50 (m, 4H), 1.19–1.11 (m, 2H).

<sup>13</sup>C NMR (126 MHz, CDCl<sub>3</sub>) δ 175.7, 42.1, 36.9, 32.5, 24.9.

IR (neat) ν 3346 (br m), 3168 (br m), 2951 (m), 2867 (m), 1661 (s), 1629 (s), 1412 (s), 1353 (m), 1308 (m), 1250 (m), 1156 (m), 952 (w), 882 (w), 809 (w), 672 (s) cm<sup>-1</sup>.

TLC R<sub>f</sub> = 0.19 in 1:1 CH<sub>2</sub>Cl<sub>2</sub>:EtOAc.

HRMS (ESI) m/z: [M + H]<sup>+</sup> Calcd for C<sub>7</sub>H<sub>13</sub>NO 128.1070; Found 128.1068.

### 3,7-Dimethyloctylamide (S3h)

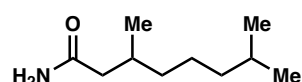

Prepared from 3,7-dimethyloctanoic acid (S2h) (5.17 g, 30.0 mmol, 1.0 equiv), CDI (6.1 g, 37.6 mmol, 1.25 equiv), and aq NH<sub>4</sub>OH (14 mL, 108 mmol, 3.6 equiv) following general procedure A. The product was obtained as a white solid (4.38 g, 85% yield) following silica gel column chromatography (1:1 CH<sub>2</sub>Cl<sub>2</sub>:EtOAc).

*The characterization data for this compound were in agreement with previously published information.*<sup>15</sup>

<sup>1</sup>H NMR (400 MHz, CDCl<sub>3</sub>) δ 5.57 (br s, 1H), 5.42 (br s, 1H), 2.26–2.19 (m, 1H), 2.00–1.90 (m, 2H), 1.52 (heptet, *J* = 6.6 Hz, 1H), 1.36–1.10 (m, 6H), 0.95 (d, *J* = 6.2 Hz, 3H), 0.86 (d, *J* = 6.6 Hz, 6H).

TLC R<sub>f</sub> = 0.39 in 1:1 CH<sub>2</sub>Cl<sub>2</sub>:EtOAc

### 3-(4-Trifluoromethylphenyl)propamide (S3u)

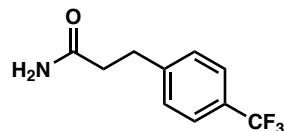

Prepared from 4-(trifluoromethyl)hydrocinnamic acid (2.2 g, 10.0 mmol, 1.0 equiv), CDI (2.03 g, 12.5 mmol, 1.25 equiv), and aq NH<sub>4</sub>OH (4.7 mL, 36.2 mmol, 3.6 equiv) following general procedure A. The product was obtained as a white solid (1.78 g, 82% yield) following silica gel column chromatography (1:1 CH<sub>2</sub>Cl<sub>2</sub>:EtOAc).

<sup>1</sup>H NMR (400 MHz, CDCl<sub>3</sub>) δ 7.54 (d, *J* = 8.0 Hz, 2H), 7.33 (d, *J* = 8.0 Hz, 2H), 5.50 (br s, 1H), 5.37 (br s, 1H), 3.03 (t, *J* = 7.6 Hz, 2H), 2.54 (t, *J* = 7.6 Hz, 2H).



$^{13}\text{C}$  NMR (126 MHz,  $\text{CDCl}_3$ ,  $^1\text{H}$  and  $^{19}\text{F}$  decoupled)  $\delta$  173.9, 144.8, 128.7, 125.4, 124.2, 36.9, 31.0.

$^{19}\text{F}$  NMR (376 MHz,  $\text{CDCl}_3$ )  $\delta$  -62.45.

IR (neat)  $\nu$  3399 (br w), 3199 (br w), 2947 (w), 1652 (m), 1615 (m), 1453 (w), 1418 (m), 1320 (s), 1246 (w), 1167 (s), 1108 (s), 1066 (s), 1018 (m), 954 (w), 912 (w), 896 (w), 837 (s), 825 (s), 733 (w), 592 (s)  $\text{cm}^{-1}$ .

TLC  $R_f$  = 0.22 in 1:1  $\text{CH}_2\text{Cl}_2$ :EtOAc.

HRMS (ESI)  $m/z$ :  $[\text{M} + \text{H}]^+$  Calcd for  $\text{C}_{10}\text{H}_{10}\text{F}_3\text{NO}$  218.0787; Found 218.0783.

### General Procedure B: Preparation of amines from amides.

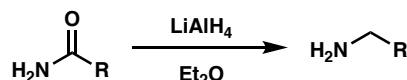

A flame-dried flask with stir bar and fitted with a reflux condenser was charged with lithium aluminum hydride ( $\text{LiAlH}_4$ ) (2.1 equiv). The flask was fitted with a rubber septum and evacuated and back-filled with  $\text{N}_2$ . Anhydrous  $\text{Et}_2\text{O}$  (0.2 M) was added and the reaction flask was cooled at  $0^\circ\text{C}$  in an ice/water bath. Amide (1.0 equiv) was carefully added portion-wise as a solid (ca. 3 portions) by briefly removing the reflux condenser and then replacing it. Once all amide had been added, the ice/water bath was replaced with an oil bath and the reaction flask was heated at reflux and stirred overnight.

After refluxing overnight, the reaction was removed from the heat and allowed to cool to room temperature and then further cooled at  $0^\circ\text{C}$  in an ice/water bath. The reaction was then carefully quenched by careful, sequential addition of deionized  $\text{H}_2\text{O}$  (1 mL/g  $\text{LiAlH}_4$ ), 15% w/v aq.  $\text{NaOH}$  (1 mL/g  $\text{LiAlH}_4$ ), and deionized  $\text{H}_2\text{O}$  (1 mL/g  $\text{LiAlH}_4$ ). The quenched reaction was left stirring at  $0^\circ\text{C}$  for ca. 30 minutes to ensure complete quenching of remaining  $\text{LiAlH}_4$ . Once fully quenched, the reaction was filtered through a pad of celite in a glass-fritted funnel by vacuum filtration eluting with  $\text{Et}_2\text{O}$  (ca.  $\frac{1}{2}$  reaction volume). The filtrate was then concentrated under reduced pressure. The concentrated crude material was generally pure without need for further purification.

### 3,7-Dimethyloctylamine (S4h)

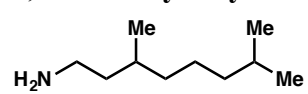 Prepared from 3,7-dimethyloctylamide (**S3h**, 3.8 g, 22.0 mmol, 1.0 equiv) and  $\text{LiAlH}_4$  (1.75 g, 46.2 mmol, 2.1 equiv) in anhydrous  $\text{Et}_2\text{O}$  (100 mL) following general procedure B. The product was obtained as a colorless oil (3.28 g, 95% yield).

The characterization data for this compound were in agreement with previously published information.<sup>16</sup>

$^1\text{H}$  NMR (400 MHz,  $\text{CDCl}_3$ )  $\delta$  2.76–2.63 (m, 2H), 1.55–1.40 (m, 3H), 1.33–1.20 (m, 5H), 1.17–1.08 (m, 2H), 0.87–0.85 (m, 9H).

### 3-(4-(Trifluoromethyl)phenyl)propylamine (S4u)

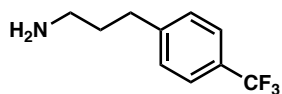

Prepared from 3-(4-trifluoromethylphenyl)propamide (**S3u**) (1.3 g, 62.0 mmol, 1.0 equiv) and LiAlH<sub>4</sub> (478 mg, 12.6 mmol, 2.1 equiv) in anhydrous Et<sub>2</sub>O (30 mL) following general procedure B. The product was obtained as a colorless oil (1.18 g, 97% yield).

<sup>1</sup>H NMR (400 MHz, CDCl<sub>3</sub>) δ 7.53 (d, *J* = 8.0 Hz, 2H), 7.29 (d, *J* = 8.0 Hz, 2H), 2.76–2.70 (m, 4H), 1.79 (dt, *J* = 7.1, 14.8 Hz, 2H), 1.50 (br s, 2H).

<sup>13</sup>C NMR (126 MHz, CDCl<sub>3</sub>, <sup>1</sup>H and <sup>19</sup>F decoupled) δ 146.2, 128.6, 128.1, 125.2, 124.3, 41.5, 34.8, 33.0.

<sup>19</sup>F NMR (376 MHz, CDCl<sub>3</sub>) δ -62.35.

IR (neat) ν 2932 (br w), 2860 (br w), 1618 (w), 1418 (w), 1321 (s), 1159 (m), 1111 (s), 1065 (s), 1018 (m), 840 (m), 814 (m), 731 (w), 631 (w), 614 (w), 594 (m) cm<sup>-1</sup>.

HRMS (ESI) *m/z*: [M + H]<sup>+</sup> Calcd for C<sub>10</sub>H<sub>12</sub>F<sub>3</sub>N 204.0995; Found 204.0995.

### General Procedure C: Preparation of *N*-Boc free sulfamides

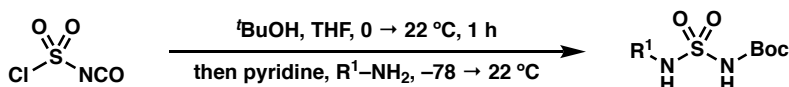

Following a modified literature procedure,<sup>17</sup> to a flame-dried round bottom flask fitted with a rubber septum and under an atmosphere of N<sub>2</sub> was added anhydrous THF (0.5 M) and chlorosulfonyl isocyanate (1.0 equiv). The solution was cooled at 0 °C in an ice water bath and <sup>t</sup>BuOH (1.0 equiv) was added dropwise via syringe. Upon complete addition of <sup>t</sup>BuOH, the solution was allowed to slowly warm to room temperature by not removing the ice water bath or adding any additional ice and was stirred for 1 h.

After 1 hour, the solution was cooled at -78 °C in a dry ice/<sup>i</sup>PrOH bath and pyridine (5.0 equiv) and amine (R<sup>1</sup>-NH<sub>2</sub>, 2.0 equiv) were added dropwise via syringe. Upon complete addition of amine, the cloudy mixture was allowed to slowly warm to room temperature by not removing the cooling bath or adding any additional dry ice and was stirred overnight. After stirring overnight, the suspension was cooled at 0 °C in an ice water bath and the pH was adjusted to 1 by dropwise addition of a 6 M HCl solution. Once reaching pH = 1, the solution was diluted with H<sub>2</sub>O (ca. 1 M) and transferred to a separatory funnel rinsing the flask with EtOAc (ca. 5 mL) to ensure quantitative transfer. The aqueous phase was extracted with EtOAc (3 x ca. 1 mL). The combined organic layers were dried over Na<sub>2</sub>SO<sub>4</sub>, filtered, and concentrated under reduced pressure to afford a white solid. The crude solid was either used without further purification or recrystallized as noted below.

### *N*-*tert*-Butoxycarbonyl-*N'*-*tert*-butylsulfamide (**S5a**)

Prepared from chlorosulfonyl isocyanate (1.7 mL, 19.8 mmol), <sup>t</sup>BuOH (1.9 mL, 19.8 mmol), pyridine (8.0 mL, 99.3 mmol), and *tert*-butylamine (4.1 mL, 39.4 mmol) following general procedure C. The product was obtained as a white solid (3.32 g, 66% yield) following recrystallization performed by dissolving the crude solid in a minimal amount of a warm solution of hexanes:EtOAc (1:4) and allowing the solution to slowly cool to room temperature before further cooling at -20 °C.

$^1\text{H}$  NMR (500 MHz,  $\text{CD}_3\text{CN}$ )  $\delta$  8.44 (br s, 1H), 5.56 (br s, 1H), 1.46 (s, 9H), 1.29 (s, 9H).

$^{13}\text{C}$  NMR (126 MHz,  $\text{CD}_3\text{CN}$ )  $\delta$  151.5, 83.1, 55.2, 29.6, 28.2.

IR (neat)  $\nu$  3277 (br), 2973 (w), 1709 (m), 1477 (w), 1454 (w), 1421 (w), 1393 (m), 1369 (m), 1348 (m), 1250 (m), 1206 (w), 1167 (m), 1138 (m), 1041 (w), 1000 (m), 914 (m), 862 (w), 817 (m), 780 (w), 720 (m), 606 (m), 575 (m)  $\text{cm}^{-1}$ .

HRMS (ESI)  $m/z$ :  $[\text{M} - \text{H}]^-$  Calcd for  $\text{C}_9\text{H}_{19}\text{N}_2\text{O}_4\text{S}$  251.1065; Found 251.1063.

#### *N*-tert-Butoxycarbonyl-*N'*-(2,2,2-trifluoroethyl)sulfamide (S5b)

Prepared from chlorosulfonyl isocyanate (1.7 mL, 19.8 mmol),  $t\text{BuOH}$  (1.9 mL, 19.8 mmol), pyridine (8.0 mL, 99.3 mmol), and 2,2,2-trifluoroethylamine (3.1 mL, 39.4 mmol) following general procedure C. The product was obtained as a white solid (5.28 g, 96% yield) following workup.

$^1\text{H}$  NMR (400 MHz,  $\text{CD}_3\text{CN}$ )  $\delta$  8.60 (br s, 1H), 6.44 (br s, 1H), 3.76 (qd,  $J = 9.2, 6.9$  Hz, 2H), 1.46 (s, 9H).

$^{13}\text{C}$  NMR (126 MHz,  $\text{CD}_3\text{CN}$ )  $\delta$  151.2, 125.1 (q,  $J = 277.7$  Hz), 83.9, 45.3 (q,  $J = 35.2$  Hz), 28.1.

$^{19}\text{F}$  NMR (376 MHz,  $\text{CD}_3\text{CN}$ )  $\delta$  -73.16 (t,  $J = 9.2$  Hz).

IR (neat)  $\nu$  3290 (br), 2999 (w), 1713 (m), 1478 (w), 1468 (w), 1427 (m), 1396 (w), 1371 (w), 1356 (m), 1299 (w), 1282 (w), 1252 (m), 1141 (m), 1111 (m), 1069 (w), 1032 (w), 970 (m), 921 (w), 848 (w), 835 (m), 820 (m), 778 (w), 761 (w), 731 (m), 667 (m), 589 (m), 545 (m)  $\text{cm}^{-1}$ .

HRMS (ESI)  $m/z$ :  $[\text{M} - \text{H}]^-$  Calcd for  $\text{C}_7\text{H}_{12}\text{F}_3\text{N}_2\text{O}_4\text{S}$  277.0469; Found 277.0457.

#### *N*-tert-Butoxycarbonyl-*N'*-ethylsulfamide (S5c)

Prepared from chlorosulfonyl isocyanate (1.7 mL, 19.8 mmol),  $t\text{BuOH}$  (1.9 mL, 19.8 mmol), pyridine (8.0 mL, 99.3 mmol), and ethylamine (20 mL of 2 M solution in THF, 40.0 mmol) following general procedure C. The product was obtained as a white solid (2.40 g, 54% yield) following recrystallization performed by dissolving the crude solid in a minimal amount of a warm solution of hexanes:EtOAc (1:4) and allowing the solution to slowly cool to room temperature before further cooling at  $-20$   $^\circ\text{C}$ .

$^1\text{H}$  NMR (500 MHz,  $\text{CD}_3\text{CN}$ )  $\delta$  8.37 (br s, 1H), 5.65 (br s, 1H), 3.03 (qd,  $J = 7.3, 6.0$  Hz, 2H), 1.46 (s, 9H), 1.13 (t,  $J = 7.2$  Hz, 3H).

$^{13}\text{C}$  NMR (126 MHz,  $\text{CD}_3\text{CN}$ )  $\delta$  151.5, 83.4, 39.4, 28.2, 14.8.

IR (neat)  $\nu$  3286 (br), 3212 (m), 2993 (w), 2938 (w), 2873 (w), 1698 (s), 1427 (s), 1394 (m), 1371 (m), 1341 (s), 1250 (m), 1153 (m), 1128 (s), 1102 (s), 1063 (w), 952 (s), 912 (m), 858 (m), 816 (s), 780 (s), 717 (s), 583 (s)  $\text{cm}^{-1}$ .

HRMS (ESI)  $m/z$ :  $[\text{M} - \text{H}]^-$  Calcd for  $\text{C}_7\text{H}_{15}\text{N}_2\text{O}_4\text{S}$  223.0752; Found 223.0752.

#### *N*-tert-Butoxycarbonyl-*N'*-hexylsulfamide (S5d)

Prepared from chlorosulfonyl isocyanate (1.7 mL, 19.8 mmol),  $t\text{BuOH}$  (1.9 mL, 19.8 mmol), pyridine (8.0 mL, 99.3 mmol), and hexylamine (5.2 mL, 39.4 mmol) following general procedure C. The product was obtained as a white solid (3.89 g, 70% yield) following silica gel column chromatography using hexanes:EtOAc (Gradient: 100% hexanes  $\rightarrow$  9:1 hexanes/EtOAc).

*Supporting Information for Sulfamides Direct Radical-Mediated Chlorination*

$^1\text{H}$  NMR (400 MHz,  $\text{CDCl}_3$ )  $\delta$  7.07 (br s, 1H), 5.02 (t,  $J = 6.6$  Hz, 1H), 3.06 (dt,  $J = 6.6, 6.6$  Hz, 2H), 1.59–1.54 (m, 2H), 1.50 (s, 9H), 1.36–1.27 (m, 6H), 0.89 (t,  $J = 6.8$  Hz, 3H).

$^{13}\text{C}$  NMR (126 MHz,  $\text{CDCl}_3$ )  $\delta$  150.2, 83.7, 43.9, 31.2, 29.0, 28.0, 26.2, 22.4, 13.9.

IR (neat)  $\nu$  3280 (br), 3219 (br), 2959 (w), 2929 (w), 2861 (w), 1696 (s), 1430 (m), 1395 (m), 1371 (m), 1349 (m), 1252 (m), 1176 (m), 1136 (s), 1077 (m), 1002 (w), 931 (m), 818 (m), 784 (m), 720 (s), 583 (s), 516 (m), 458 (m), 434 (m)  $\text{cm}^{-1}$ .

TLC  $R_f = 0.27$  in 4:1 hexanes:EtOAc.

HRMS (ESI)  $m/z$ :  $[\text{M} + \text{NH}_4]^+$  Calcd for  $\text{C}_{11}\text{H}_{24}\text{N}_2\text{O}_4\text{S} \cdot \text{NH}_4$  298.1795; Found 298.1797.

## IV. Preparation and characterization of sulfamides.

## General Procedure D: Preparation of sulfamides from sulfamic acid salts with amine nucleophiles.

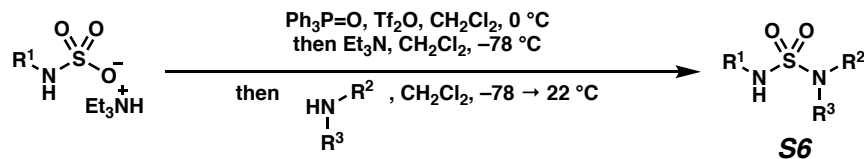

A flame-dried round bottom flask equipped with magnetic stir bar was charged with triphenylphosphine oxide (1.65 equiv) and fitted with a rubber septum. The flask was evacuated and backfilled with N<sub>2</sub>. Anhydrous CH<sub>2</sub>Cl<sub>2</sub> (0.22 M with respect to amine) was added and the flask was cooled at 0 °C in an ice water bath. Trifluoromethanesulfonic anhydride (1.5 equiv) that had been freshly removed from the glovebox was then added to the cooled solution dropwise via syringe. The reaction was allowed to stir at 0 °C in an ice water bath for 15 minutes. This suspension was treated with a solution of sulfamate salt (1.5 equiv) in CH<sub>2</sub>Cl<sub>2</sub> (1.25 M with respect to amine) via cannula transfer. The flask containing sulfamate salt solution was rinsed with CH<sub>2</sub>Cl<sub>2</sub> (ca. 5.0 M with respect to amine) to achieve quantitative transfer. The resulting yellow solution was stirred for 15 minutes at 0 °C. During this time, a clean, flame-dried round bottom flask equipped with stir bar was fitted with a rubber septum and subsequently evacuated and backfilled with N<sub>2</sub>. This process was repeated two more times. The flask was then charged with Et<sub>3</sub>N (3.0 equiv) and CH<sub>2</sub>Cl<sub>2</sub> (0.22 M with respect to amine) and the mixture was cooled at -78 °C in an <sup>i</sup>PrOH/dry ice bath. The sulfamate salt solution was transferred dropwise to the Et<sub>3</sub>N solution via cannula (during which time a yellow to intense red color often developed), rinsing the flask with CH<sub>2</sub>Cl<sub>2</sub> (ca. 2.0 M with respect to amine) to achieve quantitative transfer. The resultant solution was stirred at -78 °C for 15 minutes. The amine ((R<sup>2</sup>)(R<sup>3</sup>)-NH, 1.0 equiv) was then added as a solution in CH<sub>2</sub>Cl<sub>2</sub> (1.25 M) to the triethylamine solution via cannula. The amine-containing flask was rinsed with CH<sub>2</sub>Cl<sub>2</sub> (ca. 5.0 M with respect to amine) to achieve quantitative transfer. Without removing the cooling bath, the reaction was then stirred overnight, during which time no additional dry ice was added to the bath and the mixture gradually warmed to room temperature.

After stirring overnight, the reaction was diluted with 1 M HCl (ca. 5 mL/mmol of sulfamide) and H<sub>2</sub>O (ca. 5 mL/mmol of sulfamide). The biphasic mixture was transferred to a separatory funnel, rinsing the flask with CH<sub>2</sub>Cl<sub>2</sub> to achieve quantitative transfer. The organic phase was separated and the aqueous phase was extracted twice more with CH<sub>2</sub>Cl<sub>2</sub> (ca. ½ reaction volume). The combined organic phases were dried with MgSO<sub>4</sub>, filtered, and concentrated under reduced pressure. The crude reaction mixtures were then purified by silica gel flash chromatography by dry loading the samples and eluting with a hexanes:EtOAc solvent system as noted below.

*N*-*tert*-Butyl-*N'*-isopentylsulfamide (S6c)

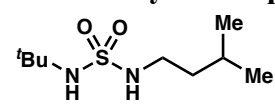
 Prepared from triethylammonium *tert*-butylsulfamate (3.8 g, 15.0 mmol) and isoamylamine (1.16 mL, 10.0 mmol) following general procedure D. The product was obtained as a white solid (2.06 g, 93% yield) after silica gel column chromatography using hexanes:EtOAc (9:1 to 4:1).

$^1\text{H}$  NMR (400 MHz,  $\text{CDCl}_3$ )  $\delta$  4.26 (br s, 1H), 4.14 (br s, 1H), 3.04 (dt,  $J = 7.0, 7.0$  Hz, 2H), 1.70–1.60 (m, 1H), 1.43 (dt,  $J = 7.0, 7.0$  Hz, 2H), 1.34 (s, 9H), 0.91 (d,  $J = 6.6$  Hz).

$^{13}\text{C}$  NMR (126 MHz,  $\text{CDCl}_3$ )  $\delta$  53.8, 41.5, 38.2, 29.8, 29.7, 25.6, 22.3.

IR (neat)  $\nu$  3295 (m, br), 2956 (w), 2867 (w), 1466 (w), 1431 (m), 1392 (m), 1364 (w), 1307 (s), 1211 (w), 1170 (w), 1135 (s), 1079 (m), 1042 (w), 1006 (m), 918 (m), 898 (m), 860 (w), 821 (w), 761 (w), 622 (m), 590 (m)  $\text{cm}^{-1}$ .

TLC  $R_f = 0.24$  in 4:1 hexanes:EtOAc

HRMS (ESI)  $m/z$ :  $[\text{M} - \text{H}]^-$  Calcd for  $\text{C}_9\text{H}_{22}\text{N}_2\text{O}_2\text{S}$  221.1329; Found 221.1332.

### *N-tert-Butyl-N'-(3,7-dimethyloct-1-yl)sulfamide (S6h)*

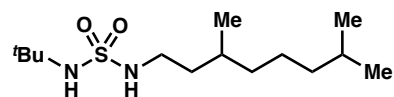

Prepared from triethylammonium *N-tert*-butylsulfamate (4.19 g, 16.5 mmol, 1.65 equiv) and 3,7-dimethyloctylamine (**S4h**, 1.57 g, 10.0 mmol, 1.00 equiv) according to general procedure D. The product was isolated as a viscous, colorless oil (2.96 g, 51% yield) after purification on a Teledyne Isco CombiFlash $R_f$  system using a Redi Sep  $R_f$  normal phase silica gel column (15:1 hexanes/EtOAc).

$^1\text{H}$  NMR (400 MHz,  $\text{CDCl}_3$ )  $\delta$  4.01 (br s, 1H), 3.92 (t,  $J = 6.7$  Hz, 1H), 3.13–2.99 (m, 2H), 1.61–1.47 (m, 3H), 1.36 (s, 9H), 1.32–1.21 (m, 4H), 1.16–1.09 (m, 3H), 0.90 (d,  $J = 6.5$  Hz, 3H), 0.87 (d,  $J = 6.6$  Hz, 6H).

$^{13}\text{C}$  NMR (126 MHz,  $\text{CDCl}_3$ )  $\delta$  53.9, 41.4, 39.2, 37.0, 36.5, 30.4, 29.8, 27.9, 24.6, 22.7, 22.6, 19.4.

IR (neat)  $\nu$  3276 (br), 2954 (w), 2925 (m), 2869 (w), 1464 (w), 1428 (w), 1391 (w), 1367 (w), 1301 (m), 1230 (w), 1137 (s), 1080 (w), 1041 (w), 988 (m), 899 (w), 765 (w), 610 (m)  $\text{cm}^{-1}$ .

TLC  $R_f = 0.29$  in 8:2 hexanes/EtOAc.

HRMS (ESI)  $m/z$ :  $[\text{M} - \text{H}]^-$  Calcd for  $\text{C}_{14}\text{H}_{31}\text{N}_2\text{O}_2\text{S}$  291.2106; Found 291.2107.

### *N-(tert-Butyl butano-4-yl)-N'-tert-butylsulfamide (S6t)*

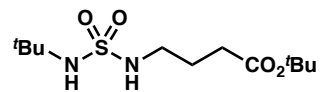

Prepared from triethylammonium *N-tert*-butylsulfamate (1.86 g, 7.30 mmol, 1.65 equiv) and *tert*-butyl 4-aminobutyrate (700.0 mg, 4.40 mmol, 1.00 equiv) according to general procedure D. The product was isolated as a white solid (659.4 mg, 51% yield) after purification on a Teledyne Isco CombiFlash $R_f$  system using a Redi Sep  $R_f$  normal phase silica gel column (7:3 hexanes/EtOAc).

$^1\text{H}$  NMR (400 MHz,  $\text{CDCl}_3$ )  $\delta$  4.26 (t,  $J = 5.3$  Hz, 1H), 4.04 (br s, 1H), 3.09 (dt,  $J = 6.7, 6.7$  Hz, 2H), 2.32 (t,  $J = 7.0$  Hz, 2H), 1.88–1.83 (m, 2H), 1.45 (s, 9H), 1.35 (s, 9H).

$^{13}\text{C}$  NMR (126 MHz,  $\text{CDCl}_3$ )  $\delta$  172.5, 80.5, 53.8, 42.6, 32.7, 29.7, 28.0, 24.5.

IR (neat)  $\nu$  3303 (br), 3262 (br), 2976 (m), 1704 (s), 1474 (w), 1438 (m), 1389 (m), 1365 (m), 1310 (s), 1296 (s), 1267 (m), 1234 (m), 1207 (m), 1159 (s), 1127 (s), 1092 (s), 1078 (m), 1039 (m), 993 (s), 957 (s), 929 (m), 872 (m), 846 (m), 785 (m), 774 (m), 613 (s), 573 (s)  $\text{cm}^{-1}$ .

TLC  $R_f = 0.07$  in 8:2 hexanes/EtOAc.

HRMS (ESI)  $m/z$ :  $[\text{M} - \text{H}]^-$  Calcd for  $\text{C}_{12}\text{H}_{25}\text{N}_2\text{O}_4\text{S}$  293.1535; Found 293.1540.

***N*-tert-Butyl-*N'*-(3-(4-trifluoromethyl)phenyl)prop-1-yl)sulfamide (S6u)**

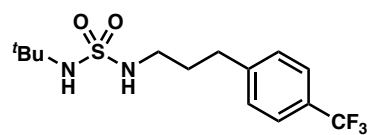

Prepared from triethylammonium *tert*-butylsulfamate (1.90 g, 7.5 mmol) and 3-(4-(trifluoromethyl)phenyl)propyl amine (**S4u**, 1.02 g, 5.0 mmol) following general procedure D. The product was obtained as a white solid (664 mg, 39% yield) after silica gel column chromatography (4:1 hexanes/EtOAc).

$^1\text{H}$  NMR (400 MHz,  $\text{CDCl}_3$ )  $\delta$  7.54 (d,  $J = 8.1$  Hz, 2H), 7.30 (d,  $J = 8.1$  Hz, 2H), 4.20 (t,  $J = 5.5$  Hz, 1H), 4.13 (br s, 1H), 3.07 (dt,  $J = 6.8, 6.8$  Hz, 2H), 2.75 (dd,  $J = 7.7, 7.7$  Hz, 2H), 1.95–1.87 (m, 2H), 1.33 (s, 9H).

$^{13}\text{C}$  NMR (126 MHz,  $\text{CDCl}_3$ ,  $^1\text{H}$  and  $^{19}\text{F}$  decoupled)  $\delta$  145.2, 128.7, 128.4, 125.4, 124.3, 54.0, 42.6, 32.7, 30.8, 29.7.

$^{19}\text{F}$  NMR (376 MHz,  $\text{CDCl}_3$ )  $\delta$  -62.41.

IR (neat)  $\nu$  3292 (br m), 2978 (w), 1672 (w), 1618 (w), 1419 (w), 1395 (w), 1369 (w), 1326 (s), 1300 (m), 1235 (w), 1162 (m), 1141 (s), 1113 (s), 1069 (m), 1047 (w), 1007 (m), 903 (w), 846 (w), 821 (w), 734 (w), 635 (w), 619 (w)  $\text{cm}^{-1}$ .

TLC  $R_f = 0.17$  in 4:1 hexanes:EtOAc

HRMS (ESI)  $m/z$ :  $[\text{M} + \text{H}]^+$  Calcd for  $\text{C}_{14}\text{H}_{21}\text{F}_3\text{N}_2\text{S}_2$  339.1349; Found 339.1347.

## V. Preparation and characterization of Boc-protected sulfamides.

### General Procedure E: Preparation of Boc-protected sulfamides.

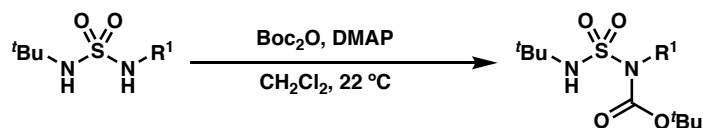

A flame-dried round bottom flask equipped with a stir bar was charged with sulfamide (1.0 equiv), 4-dimethylaminopyridine (DMAP, 1.1 equiv), and di-*tert*-butyl dicarbonate ( $\text{Boc}_2\text{O}$ , 1.3 equiv). The flask was fitted with a rubber septum and evacuated and backfilled with  $\text{N}_2$ , and charged with  $\text{CH}_2\text{Cl}_2$  (0.2 M). The resulting solution was stirred at 22 °C overnight.

After stirring overnight, the reaction was either concentrated under reduced pressure and purified by silica gel chromatography by dry loading samples and eluting with a hexanes/EtOAc solvent system as noted below, or subjected to an aqueous workup and subsequently purified. When an aqueous workup was performed, the reaction was diluted with deionized  $\text{H}_2\text{O}$  (0.2 M) and the biphasic mixture was transferred to a separatory funnel. The organic phase was removed and the aqueous was extracted twice more with  $\text{CH}_2\text{Cl}_2$  (2 x 0.2 M). The combined organic layers were dried with  $\text{MgSO}_4$ , filtered, and concentrated under reduced pressure. The crude mixture was purified by silica gel chromatography by dry loading samples and eluting with a hexanes/EtOAc solvent system as noted below.

### General Procedure F: Preparation of Boc-protected sulfamides from alcohol precursors.

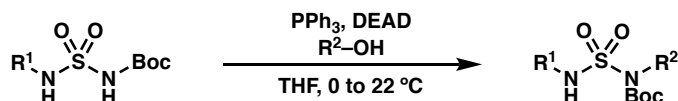

Following a procedure reported by Du Bois and co-workers,<sup>18</sup> a flame-dried round bottom flask equipped with stir bar was charged with *N*-Boc sulfamide **S5** (1.3 equiv) and triphenylphosphine ( $\text{Ph}_3\text{P}$ , 1.3 equiv). The flask was fitted with a rubber septum and evacuated and backfilled with  $\text{N}_2$ . Anhydrous THF (0.2 M with respect to alcohol) was added and the reaction flask was cooled at 0 °C in an ice water bath. Alcohol (1.0 equiv) was added via syringe followed by dropwise addition of diethylazodicarboxylate (DEAD, 1.3 equiv). Following complete addition of all reagents, the reaction was allowed to slowly warm to room temperature by not adding any more ice to the ice water bath and stirred overnight.

After stirring overnight, the reaction was concentrated under reduced pressure and purified by silica gel chromatography by dry loading samples and eluting with a hexanes/EtOAc solvent system as noted below.

#### *N*-*tert*-Butoxycarbonyl-*N*-ethyl-*N'*-hexylsulfamide (**S7a**)

Prepared from sulfamide **S5d** (925 mg, 3.3 mmol) and ethanol (0.15 mL, 2.5 mmol) following general procedure F. The product was obtained as a white solid (711 mg, 92% yield) after silica gel

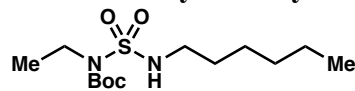



column chromatography (Gradient: 100% hexanes → 20:1 hexanes/EtOAc).

$^1\text{H}$  NMR (400 MHz,  $\text{CDCl}_3$ )  $\delta$  5.20 (t,  $J = 6.6$  Hz, 1H), 3.72 (q,  $J = 7.0$  Hz, 2H), 2.94 (dt,  $J = 6.6$ , 6.6 Hz, 2H), 1.58–1.54 (m, 2H), 1.53 (s, 9H), 1.35–1.28 (m, 6H), 1.24 (t,  $J = 7.0$  Hz, 3H), 0.89 (t,  $J = 6.8$  Hz, 3H).

$^{13}\text{C}$  NMR (126 MHz,  $\text{CDCl}_3$ )  $\delta$  151.9, 83.7, 43.8, 42.8, 31.2, 28.8, 28.1, 26.3, 22.4, 15.0, 13.9.

IR (neat)  $\nu$  3319 (br), 2933 (w), 2860 (w), 1705 (m), 1458 (w), 1424 (w), 1368 (m), 1335 (m), 1280 (m), 1256 (m), 1185 (m), 1138 (s), 1085 (w), 1000 (w), 953 (w), 910 (w), 845 (m), 816 (w), 774 (w), 714 (s), 631 (m), 616 (m), 569 (m), 464 (w)  $\text{cm}^{-1}$ .

TLC  $R_f = 0.27$  in 9:1 hexanes:EtOAc.

HRMS (ESI)  $m/z$ :  $[\text{M} + \text{Na}]^+$  Calcd for  $\text{C}_{13}\text{H}_{28}\text{N}_2\text{O}_4\text{S}\cdot\text{Na}$  331.1662; Found 331.1663.

### *N*-*tert*-Butoxycarbonyl-*N'*-hexyl-*N*-(2,2,2-trifluoro)ethylsulfamide (S7b)

Prepared from sulfamide **S5d** (925 mg, 3.3 mmol) and (2,2,2-trifluoro)ethanol (0.18 mL, 2.5 mmol) following general procedure F. The product was obtained as a white solid (213 mg, 24% yield) after silica gel column chromatography (Gradient: 100% hexanes → 20:1 hexanes/EtOAc).

$^1\text{H}$  NMR (400 MHz,  $\text{CDCl}_3$ )  $\delta$  5.23 (t,  $J = 6.6$  Hz, 1H), 4.31 (q,  $J = 8.3$  Hz, 2H), 3.03 (dt,  $J = 6.6$  Hz, 2H), 1.58–1.54 (m, 2H), 1.54 (s, 9H), 1.36–1.26 (m, 6H), 0.89 (t,  $J = 6.8$  Hz, 3H).

$^{13}\text{C}$  NMR (126 MHz,  $\text{CDCl}_3$ )  $\delta$  151.0, 123.5 (q,  $J = 280.3$  Hz), 85.5, 47.1 (q,  $J = 35.7$  Hz), 43.9, 31.2, 28.8, 27.8, 26.2, 22.4, 13.9.

$^{19}\text{F}$  NMR (376 MHz,  $\text{CDCl}_3$ )  $\delta$  -70.85 (t,  $J = 8.4$  Hz).

IR (neat)  $\nu$  3315 (br), 2933 (w), 2861 (w), 1720 (m), 1423 (w), 1397 (w), 1369 (m), 1344 (m), 1298 (w), 1251 (m), 1140 (s), 1082 (w), 1047 (w), 1027 (m), 957 (w), 850 (w), 830 (w), 794 (w), 775 (w), 706 (m), 677 (w), 642 (m), 576 (m), 530 (w), 463 (w)  $\text{cm}^{-1}$ .

TLC  $R_f = 0.25$  in 9:1 hexanes:EtOAc.

HRMS (ESI)  $m/z$ :  $[\text{M} + \text{NH}_4]^+$  Calcd for  $\text{C}_{13}\text{H}_{25}\text{F}_3\text{N}_2\text{O}_4\text{S}\cdot\text{NH}_4$  380.1825; Found 380.1832.

### *N*-*tert*-Butoxycarbonyl-*N'*-*tert*-butyl-*N*-neopentylsulfamide (S8a)

Prepared from *N*-*tert*-butyl-*N'*-neopentylsulfamide<sup>19</sup> (445 mg, 2.0 mmol),  $\text{Boc}_2\text{O}$  (567 mg, 2.6 mmol), and DMAP (269 mg, 2.2 mmol) in  $\text{CH}_2\text{Cl}_2$  (10 mL, 0.2 M) following general procedure E. The product was obtained as a white solid (441 mg, 68% yield) after silica gel column chromatography (9:1 hexanes:EtOAc).

$^1\text{H}$  NMR (400 MHz,  $\text{CDCl}_3$ )  $\delta$  5.44 (br s, 1H), 3.54 (s, 2H), 1.52 (s, 9H), 1.26 (s, 9H), 0.97 (s, 9H).

$^{13}\text{C}$  NMR (101 MHz,  $\text{CDCl}_3$ )  $\delta$  152.7, 83.4, 57.5, 54.8, 33.4, 29.4, 28.1, 28.0.

IR (neat)  $\nu$  3312 (br m), 2967 (m), 1703 (s), 1478 (m), 1433 (m), 1392 (m), 1368 (m), 1352 (s), 1285 (m), 1256 (m), 1220 (m), 1156 (s), 1139 (s), 1071 (m), 1041 (w), 1005 (s), 931 (w), 864 (w), 844 (m), 789 (m), 775 (m), 710 (s), 603 (s), 575 (s)  $\text{cm}^{-1}$ .

TLC  $R_f = 0.33$  in 9:1 hexanes:EtOAc.

HRMS (ESI)  $m/z$ :  $[\text{M} - \text{H}]^-$  Calcd for  $\text{C}_{14}\text{H}_{30}\text{N}_2\text{O}_4\text{S}$  321.1854; Found 321.1852.

***N*-tert-Butoxycarbonyl-*N*-butyl-*N'*-tert-butylsulfamide (S8b)**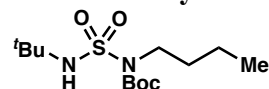

Prepared from sulfamide **S5a** (820 mg, 3.3 mmol) and 1-butanol (0.23 mL, 2.5 mmol) following general procedure F. The product was obtained as a white solid (741 mg, 96% yield) after silica gel column chromatography (Gradient: 100% hexanes → 20:1 hexanes/EtOAc).

$^1\text{H}$  NMR (400 MHz,  $\text{CDCl}_3$ )  $\delta$  5.30 (br s, 1H), 3.64 (dd,  $J = 7.5, 7.5$  Hz, 2H), 1.70–1.62 (m, 2H), 1.52 (s, 9H), 1.37–1.31 (m, 2H), 1.30 (s, 9H), 0.93 (t,  $J = 7.4$  Hz, 3H).

$^{13}\text{C}$  NMR (126 MHz,  $\text{CDCl}_3$ )  $\delta$  152.3, 83.3, 55.0, 47.3, 31.7, 29.4, 28.1, 19.8, 13.7.

IR (neat)  $\nu$  3282 (m), 2956 (m), 2931 (w), 2872 (w), 1703 (s), 1455 (m), 1441 (m), 1397 (m), 1370 (s), 1339 (s), 1294 (m), 1256 (m), 1230 (m), 1208 (w), 1167 (s), 1137 (s), 1046 (m), 1002 (m), 935 (w), 885 (w), 843 (m), 785 (m), 770 (m), 714 (s), 639 (s), 591 (s), 578 (s), 564 (s)  $\text{cm}^{-1}$ .

TLC  $R_f = 0.24$  in 9:1 hexanes:EtOAc.

HRMS (ESI)  $m/z$ :  $[\text{M} - \text{H}]^-$  Calcd for  $\text{C}_{13}\text{H}_{28}\text{N}_2\text{O}_4\text{S}$  307.1697; Found 307.1694.

***N*-tert-Butoxycarbonyl-*N'*-tert-butyl-*N*-isopentylsulfamide (S8c)**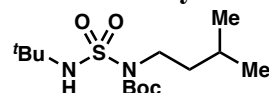

Prepared from sulfamide **S6c** (222.0 mg, 1.00 mmol),  $\text{Boc}_2\text{O}$  (283 mg, 1.30 mmol), and DMAP (122 mg, 1.00 mmol) in  $\text{CH}_2\text{Cl}_2$  (5 mL, 0.2 M) according to general procedure E. The product was isolated as a white solid (245.0 mg, 76% yield) after purification by Silicycle Silica flash F60 silica gel chromatography (9:1 hexanes/EtOAc).

$^1\text{H}$  NMR (500 MHz,  $\text{CDCl}_3$ )  $\delta$  5.31 (br s, 1H), 3.66–3.63 (m, 2H), 1.60–1.56 (m, 3H), 1.52 (s, 9H), 1.30 (s, 9H), 0.92 (d,  $J = 5.8$  Hz, 6H).

$^{13}\text{C}$  NMR (126 MHz,  $\text{CDCl}_3$ )  $\delta$  152.2, 83.3, 55.0, 46.0, 38.4, 29.4, 28.1, 25.9, 22.4.

IR (neat)  $\nu$  3308 (br), 2962 (w), 2871 (w), 1710 (m), 1470 (w), 1431 (m), 1392 (w), 1348 (m), 1293 (m), 1253 (m), 1146 (s), 1045 (m), 1009 (m), 964 (w), 932 (m), 847 (m), 798 (w), 772 (m), 754 (w), 711 (m), 629 (m), 579 (m)  $\text{cm}^{-1}$ .

TLC  $R_f = 0.38$  in 8:2 hexanes/EtOAc.

HRMS (ESI)  $m/z$ :  $[\text{M} - \text{H}]^-$  Calcd for  $\text{C}_{14}\text{H}_{29}\text{N}_2\text{O}_4\text{S}$  321.1848; Found 321.1858.

***N*-tert-Butoxycarbonyl-*N'*-tert-butyl-*N*-(2-(cyclopentyl)ethyl)sulfamide (S8d)**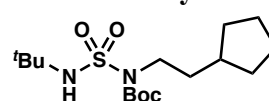

Prepared from *N*-tert-butyl-*N'*-2-cyclopentylethylsulfamide<sup>19</sup> (373 mg, 1.5 mmol),  $\text{Boc}_2\text{O}$  (426 mg, 1.95 mmol), and DMAP (202 mg, 1.65 mmol) in  $\text{CH}_2\text{Cl}_2$  (7.5 mL, 0.2 M) following general procedure E. The product was obtained as a white solid (494 mg, 94% yield) after silica gel column chromatography (Gradient: 100% hexanes → 9:1 hexanes/EtOAc).

$^1\text{H}$  NMR (400 MHz,  $\text{CDCl}_3$ )  $\delta$  5.31 (br s, 1H), 3.63 (dd,  $J = 9.7, 7.9$  Hz, 2H), 1.81–1.75 (m, 3H), 1.73–1.66 (m, 3H), 1.62–1.57 (m, 3H), 1.52 (s, 9H), 1.29 (s, 9H), 1.16–1.10 (m, 2H).

$^{13}\text{C}$  NMR (126 MHz,  $\text{CDCl}_3$ )  $\delta$  152.2, 83.3, 55.0, 47.0, 37.4, 35.9, 32.4, 29.4, 28.1, 25.1.

IR (neat)  $\nu$  3332 (br w), 2966 (m), 2861 (w), 1715 (s), 1453 (w), 1428 (m), 1392 (m), 1366 (m), 1344 (s), 1289 (m), 1259 (m), 1149 (s), 1123 (s), 1041 (m), 1011 (s), 977 (m), 920 (m), 851 (m), 808 (w), 773 (m), 746 (m), 645 (m), 605 (s), 592 (s), 543 (m)  $\text{cm}^{-1}$ .

TLC  $R_f = 0.33$  in 9:1 hexanes:EtOAc.

HRMS (ESI)  $m/z$ :  $[\text{M} + \text{Na}]^+$  Calcd for  $\text{C}_{16}\text{H}_{32}\text{N}_2\text{O}_4\text{S}\cdot\text{Na}$  371.1975; Found 371.1969.

***N*-tert-Butoxycarbonyl-*N'*-tert-butyl-*N*-(2-(cyclohexyl)eth-1-yl)sulfamide (S8e)**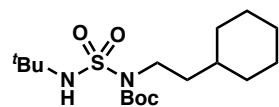

Prepared from sulfamide **S5a** (820 mg, 3.3 mmol) and 2-cyclohexylethanol (0.35 mL, 2.5 mmol) following general procedure F. The product was obtained as a colorless oil (696 mg, 77% yield) after silica gel column chromatography (Gradient: 100% hexanes → 50:1

hexanes/EtOAc).

$^1\text{H}$  NMR (400 MHz,  $\text{CDCl}_3$ )  $\delta$  5.31 (br s, 1H), 3.68–3.64 (m, 2H), 1.74–1.64 (m, 5H), 1.52 (s, 9H), 1.29 (s, 9H), 1.24–1.13 (m, 6H), 0.98–0.89 (m, 2H).

$^{13}\text{C}$  NMR (126 MHz,  $\text{CDCl}_3$ )  $\delta$  152.1, 83.2, 54.8, 45.6, 36.9, 35.2, 32.9, 29.3, 28.0, 26.3, 26.0.

IR (neat)  $\nu$  3339 (br), 2979 (w), 2922 (m), 2851 (w), 1707 (m), 1449 (w), 1425 (m), 1392 (m), 1355 (m), 1310 (w), 1292 (m), 1247 (w), 1138 (s), 986 (m), 966 (m), 914 (w), 850 (m), 808 (w), 774 (w), 713 (s), 604 (m), 582 (m), 55 (w)  $\text{cm}^{-1}$ .

TLC  $R_f$  = 0.51 in 4:1 hexanes:EtOAc.

HRMS (ESI)  $m/z$ :  $[\text{M} - \text{H}]^-$  Calcd for  $\text{C}_{17}\text{H}_{34}\text{N}_2\text{O}_4\text{S}$  361.2167; Found 361.2161.

***N*-tert-Butoxycarbonyl-*N'*-tert-butyl-*N*-((2*R*)-methyl 4-methylpentano-2-yl)sulfamide (S8f)**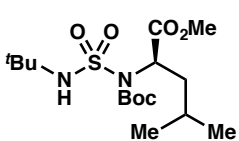

Prepared from *N'*-tert-butyl-*N*-((2*R*)-methyl 4-methylpentano-2-yl)sulfamide <sup>19</sup> (200 mg, 0.713 mmol),  $\text{Boc}_2\text{O}$  (202 mg, 0.927 mmol), and DMAP (95.9 mg, 0.7846 mmol) in  $\text{CH}_2\text{Cl}_2$  (3.5 mL, 0.2 M) following

general procedure E. The product was obtained as a colorless oil (92.3 mg, 34% yield) after silica gel column chromatography (9:1 hexanes/EtOAc) and subsequent alumina column chromatography (95:5 hexanes/EtOAc).

$^1\text{H}$  NMR (400 MHz,  $\text{CDCl}_3$ )  $\delta$  5.32 (br s, 1H), 4.85 (dd,  $J$  = 7.4, 6.0 Hz, 1H), 3.73 (s, 3H), 2.06 (ddd,  $J$  = 13.8, 7.6, 5.8 Hz, 1H), 1.86–1.80 (m, 1H), 1.74 (ddd,  $J$  = 13.8, 7.6, 5.8, 1H), 1.48 (s, 9H), 1.37 (s, 9H), 0.96 (t,  $J$  = 6.4 Hz, 6H).

$^{13}\text{C}$  NMR (126 MHz,  $\text{CDCl}_3$ )  $\delta$  170.8, 151.4, 84.2, 58.0, 55.9, 52.1, 40.3, 29.5, 27.9, 25.0, 22.8, 22.0.

IR (neat)  $\nu$  3301 (br), 2956 (w), 2871 (w), 1747 (m), 1715 (m), 1435 (w), 1395 (m), 1368 (m), 1351 (m), 1285 (m), 1252 (m), 1232 (m), 1209 (m), 1145 (s), 997 (m), 922 (w), 892 (w), 843 (m), 833 (m), 807 (w), 773 (m), 711 (m), 611 (s), 573 (s)  $\text{cm}^{-1}$ .

TLC  $R_f$  = 0.39 in 8:2 hexanes:EtOAc.

HRMS (ESI)  $m/z$ :  $[\text{M} + \text{Na}]^+$  Calcd for  $\text{C}_{16}\text{H}_{32}\text{N}_2\text{O}_6\text{S}\cdot\text{Na}$  403.1878; Found 403.1871.

***N*-tert-Butoxycarbonyl-*N'*-tert-butyl-*N*-((*S*)-2-(1,3-dioxoisindolin-2-yl)-3-methylbutyl)sulfamide (S8g)**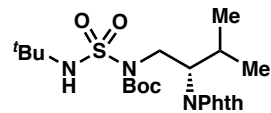

Prepared from sulfamide **S5a** (820 mg, 3.3 mmol) and (*S*)-2-(1-hydroxy-3-methylbutan-2-yl)isindoline-1,3-dione (583 mg, 2.5 mmol) following general procedure F. The product was obtained as a white solid (981 mg, 84% yield) after silica gel column chromatography (Gradient: 20:1

hexanes:EtOAc → 9:1 hexanes/EtOAc).

$^1\text{H}$  NMR (400 MHz,  $\text{CDCl}_3$ )  $\delta$  7.83–7.82 (m, 2H), 7.67 (dd,  $J$  = 5.6, 2.9 Hz, 2H), 5.19 (br s, 1H), 4.41 (dd,  $J$  = 10.9, 14.7 Hz, 1H), 4.17 (ddd,  $J$  = 2.7, 2.7, 10.9 Hz, 1H), 3.93 (dd,  $J$  = 2.7, 14.7 Hz,

<sup>1</sup>H), 2.63–2.54 (m, 1H), 1.54 (s, 9H), 1.22 (s, 9H), 1.12 (d, *J* = 6.6 Hz, 3H), 0.85 (d, *J* = 6.6 Hz, 3H).

<sup>13</sup>C NMR (126 MHz, CDCl<sub>3</sub>) δ 168.3, 151.3, 133.4, 131.7, 122.9, 122.6, 83.7, 56.8, 54.6, 46.7, 29.0, 27.8, 27.1, 20.3, 19.8.

IR (neat) ν 3309 (br), 2975 (w), 1771 (w), 1710 (s), 1615 (w), 1468 (m), 1432 (m), 1392 (m), 1370 (s), 1354 (s), 1322 (s), 1290 (m), 1237 (m), 1162 (m), 1144 (s), 1098 (m), 1068 (m), 1042 (m), 1025 (m), 990 (m), 933 (w), 888 (w), 876 (m), 844 (m), 798 (m), 772 (m), 716 (s), 709 (s), 681 (m), 601 (s), 581 (s), 551 (m), 531 (m) cm<sup>-1</sup>.

TLC R<sub>f</sub> = 0.10 in 4:1 hexanes:EtOAc.

HRMS (ESI) m/z: [M – H]<sup>-</sup> Calcd for C<sub>22</sub>H<sub>33</sub>N<sub>3</sub>O<sub>6</sub>S 466.2017; Found 466.2005.

### *N*-*tert*-Butoxycarbonyl-*N'*-*tert*-butyl-*N*-(3,7-dimethyloct-1-yl)sulfamide (S8h)

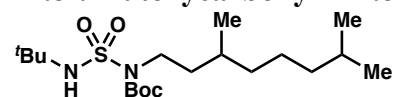

Prepared from sulfamide **S6h** (500 mg, 1.71 mmol) Boc<sub>2</sub>O (485 mg, 2.22 mmol), and DMAP (229 mg, 1.88 mmol) in CH<sub>2</sub>Cl<sub>2</sub> (8.5 mL, 0.2 M) following general procedure E. The product was isolated as a colorless oil (635 mg, 95% yield) after purification on a Teledyne Isco CombiFlashR<sub>f</sub> system using a Redi Sep R<sub>f</sub> normal phase silica gel column (9:1 hexanes/EtOAc).

<sup>1</sup>H NMR (400 MHz, CDCl<sub>3</sub>) δ 5.30 (br s, 1H), 3.69–3.56 (m, 2H), 1.73–1.66 (m, 1H), 1.50 (s, 9H), 1.48–1.37 (m, 4H), 1.28 (s, 9H), 1.27–1.20 (m, 2H), 1.13–1.08 (m, 3H), 0.88 (d, *J* = 6.4 Hz, 3H), 0.83 (d, *J* = 6.7 Hz, 6H).

<sup>13</sup>C NMR (126 MHz, CDCl<sub>3</sub>) δ 152.2, 83.3, 54.9, 45.9, 39.1, 37.0, 36.5, 30.7, 29.4, 28.1, 27.9, 24.6, 22.6, 22.5, 19.4.

IR (neat) ν 3319 (br), 2955 (w), 2927 (w), 2869 (w), 1707 (m), 1459 (w), 1426 (w), 1392 (m), 1353 (m), 1291 (m), 1255 (w), 1137 (s), 986 (m), 848 (w), 804 (w), 773 (w), 713 (m), 636 (m), 606 (m), 578 (m) cm<sup>-1</sup>.

TLC R<sub>f</sub> = 0.56 in 8:2 hexanes/EtOAc.

HRMS (ESI) m/z: [M – H]<sup>-</sup> Calcd for C<sub>19</sub>H<sub>39</sub>N<sub>2</sub>O<sub>4</sub>S 391.2630; Found 391.2636.

### *N*-*tert*-Butoxycarbonyl-*N'*-*tert*-butyl-*N*-pentylsulfamide (S8i)

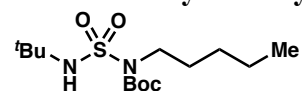

Prepared from *N*-*tert*-butyl-*N'*-pentylsulfamide<sup>19</sup> (1.00 g, 4.49 mmol) Boc<sub>2</sub>O (1.27 g, 5.84 mmol), and DMAP (602 mg, 4.92 mmol) in CH<sub>2</sub>Cl<sub>2</sub> (21 mL, 0.2 M) following general procedure E. The product was isolated as a white solid (1.17 g, 80% yield) after purification on a Teledyne Isco CombiFlashR<sub>f</sub> system using a Redi Sep R<sub>f</sub> normal phase silica gel column (9:1 hexanes/EtOAc).

<sup>1</sup>H NMR (400 MHz, CDCl<sub>3</sub>) δ 5.30 (br s, 1H), 3.63 (dd, *J* = 7.6, 7.6 Hz, 2H), 1.72–1.64 (m, 2H), 1.53 (s, 9H), 1.36–1.30 (m, 4H), 1.30 (s, 9H), 0.90 (t, *J* = 6.9 Hz, 3H).

<sup>13</sup>C NMR (126 MHz, CDCl<sub>3</sub>) δ 152.3, 83.3, 55.0, 47.5, 29.4, 29.3, 28.8, 28.1, 22.2, 13.9.

IR (neat) ν 3293 (br), 2969 (m), 2934 (m), 2861 (w), 1702 (s), 1440 (m), 1396 (m), 1382 (m), 1368 (m), 1342 (s), 1306 (m), 1278 (m), 1246 (m), 1209 (m), 1165 (s), 1136 (s), 1045 (m), 1000 (m), 935 (m), 867 (w), 843 (m), 794 (m), 769 (m), 713 (s), 640 (s), 590 (m), 564 (s) cm<sup>-1</sup>.

TLC R<sub>f</sub> = 0.57 in 8:2 hexanes/EtOAc.

HRMS (ESI) m/z: [M + Na]<sup>+</sup> Calcd for C<sub>14</sub>H<sub>30</sub>N<sub>2</sub>O<sub>4</sub>S•Na 345.1824; Found 345.1819.

***N*-tert-Butoxycarbonyl-*N'*-tert-butyl-*N*-hexylsulfamide (S8j)**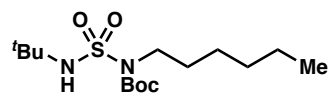

Prepared from *N*-tert-butyl-*N'*-hexylsulfamide<sup>19</sup> (1.18 g, 5.0 mmol), Boc<sub>2</sub>O (1.40 g, 6.5 mmol), and DMAP (671 mg, 5.5 mmol) in CH<sub>2</sub>Cl<sub>2</sub> (25 mL, 0.2 M) following general procedure E. The product was obtained as a white solid (1.37 g, 82% yield) after silica gel column chromatography (20:1 hexanes/EtOAc).

<sup>1</sup>H NMR (400 MHz, CDCl<sub>3</sub>) δ 5.30 (br s, 1H), 3.63 (dd, *J* = 7.6, 7.6 Hz, 2H), 1.71–1.64 (m, 2H), 1.52 (s, 9H), 1.30 (s, 9H), 1.33–1.26 (m, 6H), 0.87 (t, *J* = 6.7 Hz, 3H).

<sup>13</sup>C NMR (101 MHz, CDCl<sub>3</sub>) δ 152.2, 83.3, 54.9, 47.5, 31.3, 29.5, 29.4, 28.1, 26.2, 22.5, 13.9.

IR (neat) ν 3343 (br w), 2960 (w), 2932 (w), 2860 (w), 1705 (m), 1457 (w), 1425 (w), 1392 (m), 1368 (m), 1353 (s), 1294 (m), 1256 (m), 1164 (s), 1138 (s), 1042 (w), 982 (m), 848 (w), 774 (w), 736 (s), 714 (s), 637 (m), 606 (m), 578 (m) cm<sup>-1</sup>.

TLC R<sub>f</sub> = 0.34 in 9:1 hexanes:EtOAc.

HRMS (ESI) *m/z*: [M – H]<sup>-</sup> Calcd for C<sub>15</sub>H<sub>32</sub>N<sub>2</sub>O<sub>4</sub>S 335.2010; Found 335.2003.

***N*-tert-Butyloxycarbonyl-*N'*-tert-butyl-*N*-(methyl hexano-6-yl)sulfamide (S7k)**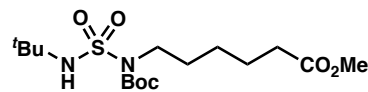

Prepared from *N'*-tert-butyl-*N*-(methyl hexano-6-yl)sulfamide<sup>19</sup> (500 mg, 1.78 mmol), Boc<sub>2</sub>O (505 mg, 2.31 mmol), and DMAP (239 mg, 1.96 mmol) in CH<sub>2</sub>Cl<sub>2</sub> (9.0 mL, 0.2 M) following general procedure E. The product was isolated as a colorless oil (390 mg, 57% yield) after purification on a Teledyne Isco CombiFlashR<sub>f</sub> system using a Redi Sep R<sub>f</sub> normal phase silica gel column (8:2 hexanes/EtOAc).

<sup>1</sup>H NMR (400 MHz, CDCl<sub>3</sub>) δ 5.29 (br s, 1H), 3.66 (s, 3H), 3.66–3.62 (m, 2H), 2.32 (t, *J* = 7.5 Hz, 2H), 1.74–1.62 (m, 4H), 1.53 (s, 9H), 1.39–1.33 (m, 2H), 1.30 (s, 9H).

<sup>13</sup>C NMR (126 MHz, CDCl<sub>3</sub>) δ 173.9, 152.2, 83.5, 55.0, 51.4, 47.2, 33.9, 29.4, 29.2, 28.1, 26.1, 24.5.

IR (neat) ν 3312 (br), 2974 (w), 1707 (m), 1426 (w), 1392 (m), 1352 (s), 1293 (w), 1253 (w), 1137 (s), 1040 (w), 987 (m), 918 (w), 847 (m), 773 (w), 712 (s), 635 (m), 577 (m) cm<sup>-1</sup>.

TLC R<sub>f</sub> = 0.25 in 8:2 hexanes/EtOAc.

HRMS (ESI) *m/z*: [M – H]<sup>-</sup> Calcd for C<sub>16</sub>H<sub>31</sub>N<sub>2</sub>O<sub>6</sub>S 379.1902; Found 379.1901.

***N*-Acetyl-*N'*-tert-butyl-*N*-hexylsulfamide (S8l)**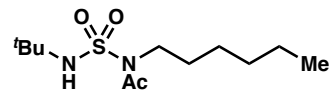

A flame-dried round bottom flask equipped with a stir bar was charged with *N*-tert-butyl-*N'*-hexylsulfamide<sup>19</sup> (595 mg, 2.5 mmol, 1.0 equiv) and DMAP (336 mg, 2.8 mmol, 1.1 equiv). The flask was fitted with a rubber septum and evacuated and backfilled with N<sub>2</sub>, and CH<sub>2</sub>Cl<sub>2</sub> (13 mL, 0.2 M) was added followed by acetic anhydride (Ac<sub>2</sub>O, 0.5 mL, 5.0 mmol, 2.0 equiv). The resulting solution was stirred at 22 °C overnight.

After stirring overnight, the reaction was diluted with deionized H<sub>2</sub>O (0.2 M) and the biphasic mixture was transferred to a separatory funnel. The organic phase was removed and the aqueous was extracted twice more with CH<sub>2</sub>Cl<sub>2</sub> (2 x 0.2 M). The combined organic layers were dried with MgSO<sub>4</sub>, filtered, and concentrated under reduced pressure. The product was obtained as a

colorless oil (678 mg, 97% yield) after silica gel column chromatography (20:1 hexanes/EtOAc).

$^1\text{H}$  NMR (400 MHz,  $\text{CDCl}_3$ )  $\delta$  5.41 (br s, 1H), 3.67 (dd,  $J = 7.9, 7.9$  Hz, 2H), 2.28 (s, 3H), 1.76–1.69 (m, 2H), 1.35–1.30 (m, 6H), 1.29 (s, 9H), 0.88 (t,  $J = 6.7$  Hz, 3H).

$^{13}\text{C}$  NMR (101 MHz,  $\text{CDCl}_3$ )  $\delta$  171.0, 55.2, 47.9, 31.2, 29.8, 29.3, 26.3, 23.7, 22.4, 13.8.

IR (neat)  $\nu$  3290 (br), 2958 (w), 2931 (w), 2859 (w), 1669 (m), 1427 (m), 1393 (m), 1348 (s), 1258 (m), 1232 (m), 1205 (m), 1151 (s), 1092 (m), 1039 (m), 1000 (m), 946 (m), 848 (m), 759 (w), 727 (w), 696 (m), 667 (m), 598 (s), 582 (s), 546 (s)  $\text{cm}^{-1}$ .

TLC  $R_f = 0.22$  in 4:1 hexanes:EtOAc.

HRMS (ESI)  $m/z$ :  $[\text{M} - \text{H}]^-$  Calcd for  $\text{C}_{12}\text{H}_{26}\text{N}_2\text{O}_3\text{S}$  277.1591; Found 277.1584.

### *N*-*tert*-Butyl-*N'*-hexyl-*N'*-(2,2,2-trifluoroethyl)sulfamide (S8m)

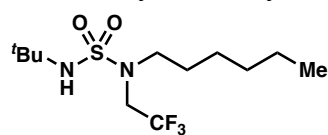

Prepared from *N*-(*tert*-butyl)-*N'*-(2,2,2-trifluoroethyl)sulfamide<sup>11</sup> (761 mg, 3.3 mmol) and 1-hexanol (0.3 mL, 2.5 mmol) following general procedure F. The product was obtained as a colorless oil (575 mg, 72% yield) after silica gel column chromatography (Gradient:

100% hexanes  $\rightarrow$  50:1 hexanes/EtOAc).

$^1\text{H}$  NMR (400 MHz,  $\text{CDCl}_3$ )  $\delta$  3.98 (br s, 1H), 3.80 (q,  $J = 9.0$  Hz, 2H), 3.27 (dd,  $J = 8.0, 8.0$  Hz, 2H), 1.68–1.60 (m, 2H), 1.34 (s, 9H), 1.31–1.23 (m, 6H), 0.89 (t,  $J = 6.7$  Hz, 3H).

$^{13}\text{C}$  NMR (126 MHz,  $\text{CDCl}_3$ )  $\delta$  124.5 (q,  $J = 280.4$  Hz), 54.7, 49.3, 48.0 (q,  $J = 34.2$  Hz), 31.3, 29.5, 26.9, 26.3, 22.4, 13.8.

$^{19}\text{F}$  NMR (376 MHz,  $\text{CDCl}_3$ )  $\delta$  -69.49 (t,  $J = 9.0$  Hz).

IR (neat)  $\nu$  3286 (br), 2959 (w), 2932 (w), 2861 (w), 1780 (w), 1468 (w), 1428 (w), 1393 (w), 1369 (w), 1321 (m), 1273 (m), 1233 (m), 1141 (s), 1040 (m), 986 (m), 867 (m), 832 (w), 771 (m), 725 (w), 665 (m), 607 (m), 562 (m)  $\text{cm}^{-1}$ .

TLC  $R_f = 0.24$  in 9:1 hexanes:EtOAc.

HRMS (ESI)  $m/z$ :  $[\text{M} - \text{H}]^-$  Calcd for  $\text{C}_{12}\text{H}_{25}\text{F}_3\text{N}_2\text{O}_2\text{S}$  317.1516; Found 317.1510.

### *N'*-*tert*-Butyl-*N*-trifluoroacetyl-*N*-pentylsulfamide (S8n)

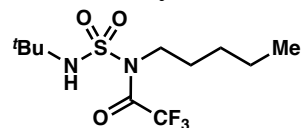

A flame-dried round bottom flask equipped with stir bar was charged with *N*-*tert*-butyl-*N'*-pentylsulfamide<sup>19</sup> (150 mg, 0.67 mmol, 1.0 equiv) and DMAP (90.7 mg, 0.74 mmol, 1.1 equiv). The flask was fitted with a rubber septum and evacuated and backfilled with  $\text{N}_2$ .  $\text{CH}_2\text{Cl}_2$  (3.3 mL,

0.2 M) was added followed by trifluoroacetic anhydride (TFAA, 0.12 mL, 0.87 mmol, 1.3 equiv). The resulting solution was stirred at 22  $^\circ\text{C}$  overnight. After stirring overnight, the solution was concentrated under reduced pressure. The product was isolated as a colorless oil (0.67 mmol scale, 129.3 mg, 60% yield) after purification on a Teledyne Isco CombiFlash $R_f$  system using a Redi Sep  $R_f$  normal phase silica gel column (9:1 hexanes/EtOAc).

$^1\text{H}$  NMR (400 MHz,  $\text{CDCl}_3$ )  $\delta$  5.54 (br s, 1H), 3.79–3.74 (m, 2H), 1.85–1.77 (m, 2H), 1.39–1.34 (m, 4H), 1.31 (s, 9H), 0.91 (t,  $J = 6.9$  Hz, 3H).

$^{13}\text{C}$  NMR (126 MHz,  $\text{CDCl}_3$ )  $\delta$  156.5 (q,  $J = 38.3$  Hz), 115.5 (q,  $J = 288.9$  Hz), 56.2, 47.9, 30.1, 29.3, 28.6, 22.0, 13.8.

$^{19}\text{F}$  NMR (376 MHz,  $\text{CDCl}_3$ )  $\delta$  -70.70.

IR (neat)  $\nu$  3310 (br), 2960 (w), 2875 (w), 1703 (m), 1431 (m), 1396 (m), 1364 (m), 1286 (w), 1232 (m), 1208 (m), 1168 (s), 1148 (s), 1064 (s), 862 (w), 792 (w), 758 (m), 697 (m), 684 (m), 640 (w), 613 (s), 580 (m), 528 (m)  $\text{cm}^{-1}$ .

TLC  $R_f$  = 0.57 in 8:2 hexanes/EtOAc.

HRMS (ESI)  $m/z$ :  $[M - H]^-$  Calcd for  $\text{C}_{11}\text{H}_{20}\text{F}_3\text{N}_2\text{O}_3\text{S}$  317.1146; Found 317.1151.

#### *N*-*tert*-Butoxycarbonyl-*N'*-(2,2,2-trifluoroethyl)-*N*-hexylsulfamide (**S8o**)

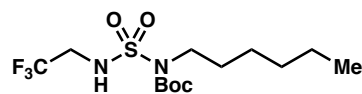

Prepared from sulfamide **S5b** (1.8 g, 6.5 mmol) and 1-hexanol (0.63 mL, 5.0 mmol) following general procedure F. The product was obtained as a colorless oil (1.59 g, 88% yield) after silica gel column chromatography (hexanes/EtOAc (20:1)).

$^1\text{H}$  NMR (400 MHz,  $\text{CDCl}_3$ )  $\delta$  5.79 (t,  $J$  = 6.5 Hz, 1H), 3.70–3.61 (m, 4H), 1.65–1.59 (m, 2H), 1.52 (s, 9H), 1.32–1.29 (m, 6H), 0.88 (t,  $J$  = 6.7 Hz, 3H).

$^{13}\text{C}$  NMR (126 MHz,  $\text{CDCl}_3$ )  $\delta$  151.8, 123.4 (q,  $J$  = 279.0 Hz), 84.4, 48.2, 45.1, (q,  $J$  = 35.3 Hz), 31.2, 29.6, 27.8, 26.1, 22.4, 13.9.

$^{19}\text{F}$  NMR (376 MHz,  $\text{CDCl}_3$ )  $\delta$  -72.10 (t,  $J$  = 8.9 Hz).

IR (neat)  $\nu$  3302 (br w), 2933 (w), 2861 (w), 1705 (m), 1458 (w), 1369 (m), 1277 (m), 1256 (m), 1139 (s), 1047 (w), 963 (m), 832 (m), 773 (w), 718 (s), 664 (m), 630 (m), 581 (m), 549 (m)  $\text{cm}^{-1}$ .

TLC  $R_f$  = 0.26 in 9:1 hexanes:EtOAc.

HRMS (ESI)  $m/z$ :  $[M - H]^-$  Calcd for  $\text{C}_{13}\text{H}_{25}\text{F}_3\text{N}_2\text{O}_4\text{S}$  361.1414; Found 361.1405.

#### *N*-*tert*-Butyl-*N'*-4-methylpentyl-*N''*-(2,2,2-trifluoroethyl)sulfamide (**S8p**)

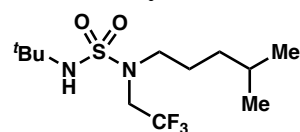

Prepared from *N*-(*tert*-butyl)-*N'*-(2,2,2-trifluoroethyl)sulfamide<sup>11</sup> (761 mg, 3.3 mmol) and 4-methylpentanol (255 mg, 2.5 mmol) following general procedure F. The product was obtained as a colorless oil (726 mg, 91% yield) after silica gel column chromatography (Gradient: 100% hexanes  $\rightarrow$  20:1 hexanes/EtOAc).

$^1\text{H}$  NMR (400 MHz,  $\text{CDCl}_3$ )  $\delta$  3.96 (br s, 1H), 3.81 (q,  $J$  = 9.0 Hz, 2H), 3.26 (dd,  $J$  = 8.0, 8.0 Hz, 2H), 1.69–1.58 (m, 3H), 1.34 (s, 9H), 1.18–1.13 (m, 2H), 0.89 (d,  $J$  = 6.7 Hz, 6H).

$^{13}\text{C}$  NMR (126 MHz,  $\text{CDCl}_3$ )  $\delta$  124.5 (q,  $J$  = 280.6 Hz), 54.7, 49.5, 48.0 (q,  $J$  = 34.6 Hz), 35.7, 29.5, 27.6, 24.8, 22.4.

$^{19}\text{F}$  NMR (376 MHz,  $\text{CDCl}_3$ )  $\delta$  -69.50 (t,  $J$  = 8.8 Hz).

IR (neat)  $\nu$  3285 (br ), 2958 (w), 2873 (w), 1469 (w), 1429 (w), 1393 (w), 1368 (w), 1321 (m), 1274 (m), 1234 (w), 1141 (s), 1041 (m), 985 (s), 929 (w), 904 (w), 871 (m), 831 (w), 770 (m), 731 (m), 664 (m), 607 (m), 562 (m)  $\text{cm}^{-1}$ .

TLC  $R_f$  = 0.30 in 9:1 hexanes:EtOAc.

HRMS (ESI)  $m/z$ :  $[M - H]^-$  Calcd for  $\text{C}_{12}\text{H}_{25}\text{F}_3\text{N}_2\text{O}_2\text{S}$  317.1516; Found 317.1508.

#### *N*-*tert*-Butoxycarbonyl-*N'*-*tert*-butyl-*N*-4-methylpentylsulfamide (**S8q**)

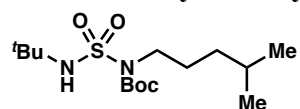

Prepared from sulfamide **S5a** (820 mg, 3.3 mmol) and 4-methylpentanol (255 mg, 2.5 mmol) following general procedure F. The product was obtained as a white solid (794 mg, 94% yield) after silica gel column chromatography (Gradient: 100% hexanes  $\rightarrow$  20:1 hexanes/EtOAc).

$^1\text{H}$  NMR (400 MHz,  $\text{CDCl}_3$ )  $\delta$  5.29 (br s, 1H), 3.60 (dd,  $J = 7.7, 7.7$  Hz, 2H), 1.71–1.63 (m, 3H), 1.51 (s, 9H), 1.28 (s, 9H), 1.20–1.14 (m, 2H), 0.87 (d,  $J = 6.6$  Hz, 6H).

$^{13}\text{C}$  NMR (126 MHz,  $\text{CDCl}_3$ )  $\delta$  152.2, 83.3, 55.0, 47.7, 35.7, 29.4, 28.1, 27.5, 27.4, 22.5.

IR (neat)  $\nu$  3296 (m), 2971 (m), 2871 (w), 1702 (s), 1457 (m), 1442 (m), 1396 (m), 1380 (m), 1369 (m), 1347 (s), 1322 (s), 1283 (m), 1250 (m), 1166 (s), 1137 (s), 1044 (m), 996 (m), 936 (w), 866 (w), 843 (m), 791 (m), 770 (m), 711 (s), 641 (s), 591 (s), 565 (s)  $\text{cm}^{-1}$ .

TLC  $R_f = 0.32$  in 9:1 hexanes:EtOAc.

HRMS (ESI)  $m/z$ :  $[\text{M} - \text{H}]^-$  Calcd for  $\text{C}_{15}\text{H}_{32}\text{N}_2\text{O}_4\text{S}$  335.2010; Found 335.2005.

#### *N*-*tert*-Butoxycarbonyl-*N*-4-methylpentyl-*N'*-(2,2,2-trifluoroethyl)sulfamide (**S8r**)

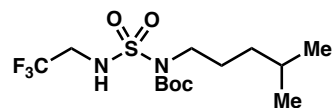

Prepared from sulfamide **S5b** (820 mg, 3.3 mmol) and 4-methylpentanol (255 mg, 2.5 mmol) following general procedure F. The product was obtained as a pale yellow oil (693 mg, 76% yield) after silica gel column chromatography (Gradient: 100% hexanes  $\rightarrow$

20:1 hexanes/EtOAc).

$^1\text{H}$  NMR (400 MHz,  $\text{CDCl}_3$ )  $\delta$  5.82 (t,  $J = 7.2$  Hz, 1H), 3.71–3.59 (m, 4H), 1.68–1.58 (m, 3H), 1.52 (s, 9H), 1.21–1.15 (m, 2H), 0.89 (d,  $J = 6.6$  Hz, 6H).

$^{13}\text{C}$  NMR (126 MHz,  $\text{CDCl}_3$ )  $\delta$  151.8, 123.4 (q,  $J = 278.6$  Hz), 84.3, 48.3, 45.0 (q,  $J = 35.4$  Hz), 35.5, 27.8, 27.4, 27.4, 22.3.

$^{19}\text{F}$  NMR (376 MHz,  $\text{CDCl}_3$ )  $\delta$  -71.56 (t,  $J = 8.8$  Hz).

IR (neat)  $\nu$  3302 (br), 2956 (w), 2872 (w), 1704 (m), 1458 (w), 1368 (m), 1278 (w), 1139 (s), 1049 (w), 963 (m), 832 (m), 791 (m), 773 (m), 719 (w), 664 (m), 630 (m), 582 (m), 549 (m)  $\text{cm}^{-1}$ .

TLC  $R_f = 0.46$  in 4:1 hexanes:EtOAc.

HRMS (ESI)  $m/z$ :  $[\text{M} - \text{H}]^-$  Calcd for  $\text{C}_{13}\text{H}_{25}\text{F}_3\text{N}_2\text{O}_4\text{S}$  361.1414; Found 361.1407.

#### *N*-*tert*-Butoxycarbonyl-*N'*-*tert*-butyl-*N*-(*tert*-butyl butano-4-yl)sulfamide (**S8t**)

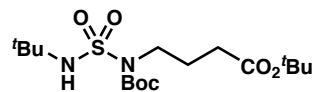

Prepared from sulfamide **S6s** (642 mg, 2.18 mmol),  $\text{Boc}_2\text{O}$  (619 mg, 2.83 mmol), and DMAP (293 mg, 2.40 mmol) in  $\text{CH}_2\text{Cl}_2$  (11 mL, 0.2 M) following general procedure E. The product was isolated as a

colorless oil (651 mg, 76% yield) after purification on a Teledyne Isco CombiFlash $R_f$  system using a Redi Sep  $R_f$  normal phase silica gel column (9:1 hexanes/EtOAc).

$^1\text{H}$  NMR (500 MHz,  $\text{CDCl}_3$ )  $\delta$  5.29 (br s, 1H), 3.71–3.68 (m, 2H), 2.28 (t,  $J = 7.5$  Hz, 2H), 1.98–1.92 (m, 2H), 1.53 (s, 9H), 1.44 (s, 9H), 1.30 (s, 9H).

$^{13}\text{C}$  NMR (101 MHz,  $\text{CDCl}_3$ )  $\delta$  171.8, 151.9, 83.4, 80.0, 54.8, 46.5, 32.3, 29.2, 27.9, 27.8, 24.8.

IR (neat)  $\nu$  3321 (br), 2970 (w), 1706 (m), 1476 (w), 1453 (w), 1432 (w), 1394 (m), 1367 (m), 1346 (s), 1286 (m), 1258 (m), 1139 (s), 1098 (m), 1041 (w), 994 (m), 946 (w), 864 (w), 847 (m), 794 (w), 774 (m), 753 (w), 735 (w), 710 (m), 631 (m), 591 (m), 575 (m)  $\text{cm}^{-1}$ .

TLC  $R_f = 0.47$  in 8:2 hexanes/EtOAc.

HRMS (ESI)  $m/z$ :  $[\text{M} - \text{H}]^-$  Calcd for  $\text{C}_{17}\text{H}_{33}\text{N}_2\text{O}_6\text{S}$  393.2059; Found 393.2056.



***N*-tert-Butoxycarbonyl-*N'*-tert-butyl-*N*-(3-((4-trifluoromethyl)phenyl)prop-1-yl)sulfamide (S8u)**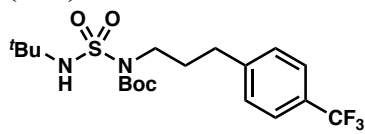

Prepared from sulfamide **S6u** (664 mg, 1.9 mmol), Boc<sub>2</sub>O (539 mg, 2.5 mmol), and DMAP (262 mg, 2.1 mmol) in CH<sub>2</sub>Cl<sub>2</sub> (10 mL, 0.2 M) following general procedure E. The product was obtained as a white solid (742 mg, 86% yield) after silica gel column chromatography (9:1 hexanes/EtOAc).

<sup>1</sup>H NMR (400 MHz, CDCl<sub>3</sub>) δ 7.54 (d, *J* = 7.9 Hz, 2H), 7.31 (d, *J* = 7.9 Hz, 2H), 5.30 (br s, 1H), 3.69 (t, *J* = 7.5 Hz, 2H), 2.72 (t, *J* = 7.7 Hz, 2H), 2.07–1.99 (m, 2H), 1.48 (s, 9H), 1.30 (s, 9H).

<sup>13</sup>C NMR (126 MHz, CDCl<sub>3</sub>) δ 152.0, 145.4, 128.6, 128.2 (q, *J* = 32.3 Hz), 125.2 (q, *J* = 3.7 Hz), 124.3 (q, *J* = 271.7 Hz), 83.6, 55.1, 46.8, 32.7, 30.7, 29.4, 28.0.

<sup>19</sup>F NMR (376 MHz, CDCl<sub>3</sub>) δ -62.38.

IR (neat) ν 3296 (br w), 2977 (w), 1718 (m), 1618 (w), 1477 (w), 1462 (w), 1433 (w), 1395 (w), 1381 (w), 1369 (m), 1348 (m), 1328 (s), 1302 (m), 1270 (m), 1253 (m), 1160 (s), 1138 (s), 1112 (s), 1067 (s), 1020 (m), 991 (m), 848 (m), 838 (m), 824 (m), 792 (m), 775 (m), 717 (s), 680 (w), 624 (s), 608 (m), 595 (m), 577 (s) cm<sup>-1</sup>.

TLC R<sub>f</sub> = 0.24 in 9:1 hexanes:EtOAc.

HRMS (ESI) *m/z*: [M + Na]<sup>+</sup> Calcd for C<sub>19</sub>H<sub>29</sub>F<sub>3</sub>N<sub>2</sub>O<sub>4</sub>S•Na 461.1692; Found 461.1691.

***N*-tert-Butoxycarbonyl-*N'*-(2,2,2-trifluoroethyl)-*N*-pentylsulfamide (S8v)**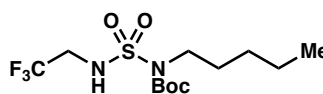

Prepared from sulfamide **S5b** (1.01 g, 3.65 mmol) and 1-pentanol (0.30 mL, 2.80 mmol) following general procedure F. The product was obtained as a colorless oil (947 mg, 97% yield) after purification on a Teledyne Isco CombiFlashR<sub>f</sub> system using a Redi Sep R<sub>f</sub> normal phase silica gel column (9:1 hexanes/EtOAc).

<sup>1</sup>H NMR (400 MHz, CDCl<sub>3</sub>) δ 5.78 (t, *J* = 6.9 Hz, 1H), 3.71–3.61 (m, 4H), 1.68–1.60 (m, 2H), 1.53 (s, 9H), 1.39–1.24 (m, 4H), 0.91 (t, *J* = 6.9 Hz, 3H).

<sup>13</sup>C NMR (126 MHz, CDCl<sub>3</sub>) δ 152.0, 123.7 (q, *J* = 278.1 Hz), 84.5, 48.4, 45.2 (q, *J* = 36.2 Hz), 29.5, 28.8, 28.0, 22.3, 14.0.

<sup>19</sup>F NMR (376 MHz, CDCl<sub>3</sub>) δ -72.13 (t, *J* = 8.7 Hz).

IR (neat) ν 3300 (br), 2961 (w), 2934 (w), 2873 (w), 1704 (m), 1457 (w), 1368 (m), 1276 (m), 1139 (s), 1044 (w), 1017 (w), 961 (m), 912 (w), 832 (m), 799 (m), 773 (w), 718 (s), 664 (m), 629 (m), 580 (m), 548 (m) cm<sup>-1</sup>.

TLC R<sub>f</sub> = 0.21 in 8:2 hexanes/EtOAc.

HRMS (ESI) *m/z*: [M + Na]<sup>+</sup> Calcd for C<sub>12</sub>H<sub>23</sub>F<sub>3</sub>N<sub>2</sub>O<sub>4</sub>S•Na 371.1228; Found 371.1212.

***N*-tert-Butoxycarbonyl-*N'*-ethyl-*N*-pentylsulfamide (S8w)**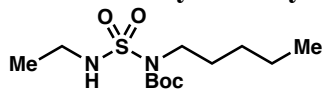

Prepared from sulfamide **S5c** (729 mg, 3.25 mmol) and 1-pentanol (0.27 mL, 2.50 mmol) following general procedure F. The product was obtained as a colorless oil (520 mg, 71% yield) after purification on a Teledyne Isco CombiFlashR<sub>f</sub> system using a Redi Sep R<sub>f</sub> normal phase silica gel column (9:1 hexanes:EtOAc).

*Supporting Information for Sulfamides Direct Radical-Mediated Chlorination*

$^1\text{H}$  NMR (400 MHz,  $\text{CDCl}_3$ )  $\delta$  5.19 (t,  $J = 6.0$  Hz, 1H), 3.65–3.61 (m, 2H), 3.06–2.99 (m, 2H), 1.68–1.61 (m, 2H), 1.52 (s, 9H), 1.36–1.26 (m, 4H), 1.19 (t,  $J = 7.3$  Hz, 3H), 0.90 (t,  $J = 6.8$  Hz, 3H).

$^{13}\text{C}$  NMR (126 MHz,  $\text{CDCl}_3$ )  $\delta$  151.8, 83.4, 47.4, 38.6, 29.1, 28.4, 27.7, 21.9, 14.1, 13.6.

IR (neat)  $\nu$  3311 (br), 2959 (w), 2933 (w), 2872 (w), 1703 (m), 1455 (w), 1424 (w), 1359 (m), 1279 (m), 1257 (m), 1136 (s), 1063 (m), 1044 (w), 1016 (w), 949 (w), 845 (m), 798 (w), 773 (m), 714 (s), 630 (m), 571 (s)  $\text{cm}^{-1}$ .

TLC  $R_f = 0.43$  in 8:2 hexanes/EtOAc.

HRMS (ESI)  $m/z$ :  $[\text{M} + \text{Na}]^+$  Calcd for  $\text{C}_{12}\text{H}_{26}\text{N}_2\text{O}_4\text{S}\cdot\text{Na}$  317.1511; Found 317.1498.

VI. Preparation and characterization of *N*-chlorosulfamides.General Procedure G: Preparation of *N*-Chlorosulfamides with Trichloroisocyanuric acid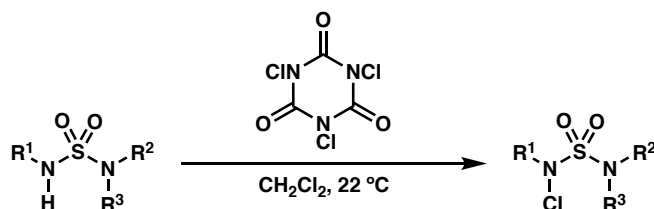

A flame-dried round bottom flask equipped with stir bar was charged with sulfamide (1.0 equiv) and trichloroisocyanuric acid (TCICA, 1.2 equiv). The flask was evacuated and backfilled with N<sub>2</sub>. Anhydrous CH<sub>2</sub>Cl<sub>2</sub> (0.2 M) was then added via syringe. The suspension was stirred at 21 °C until complete consumption of the starting material as evidenced by TLC.

The suspension was quenched by addition of H<sub>2</sub>O (~0.2 M) and the biphasic mixture was transferred to a separatory funnel rinsing the flask with CH<sub>2</sub>Cl<sub>2</sub> (ca. 5 mL) to ensure quantitative transfer. The organic phase was separated and the aqueous phase was extracted with CH<sub>2</sub>Cl<sub>2</sub> (2 x ca. 5 mL/mmol sulfamide). The combined organic extracts were dried over MgSO<sub>4</sub>, filtered, and concentrated under reduced pressure. The crude reaction mixtures were then purified by flash column chromatography on silica gel or florisil eluting with a hexanes/EtOAc solvent system as noted below.

General Procedure H: Preparation of *N*-Chlorosulfamides with *tert*-butyl hypochlorite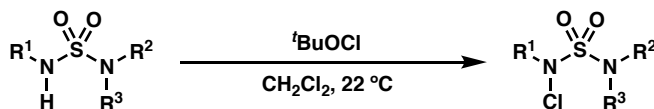

A flame-dried round bottom flask equipped with stir bar was charged with sulfamide (1.0 equiv). The flask was evacuated and backfilled with N<sub>2</sub>. Anhydrous CH<sub>2</sub>Cl<sub>2</sub> (0.2 M) was then added via syringe. To the stirring solution was added neat *tert*-butyl hypochlorite (tBuOCl, equiv indicated below) in portions via syringe until complete consumption of the starting material as evidenced by TLC.

Upon complete consumption of the starting material as indicated by TLC, all volatiles were removed under reduced pressure to afford the pure compound or crude mixtures to be purified as indicated below.

*N-tert*-Butoxycarbonyl-*N'*-chloro-*N*-ethyl-*N'*-hexylsulfamide (5a)

Prepared from sulfamide **S7a** (308 mg, 1.0 mmol) and TCICA (279 mg, 1.2 mmol) in CH<sub>2</sub>Cl<sub>2</sub> (5 mL) following general procedure G. The product was obtained as a colorless oil (326 mg, 95% yield) after silica gel column chromatography (Gradient: 100% hexanes → 20:1 hexanes/EtOAc).

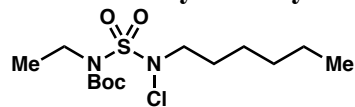

$^1\text{H}$  NMR (400 MHz,  $\text{CDCl}_3$ )  $\delta$  3.84 (q,  $J = 7.0$  Hz, 2H), 3.61 (dd,  $J = 7.1$  Hz, 2H), 1.74–1.67 (m, 2), 1.53 (s, 9H), 1.38–1.32 (m, 6H), 1.30 (t,  $J = 7.0$  Hz, 3H), 0.89 (t,  $J = 6.8$  Hz, 3H).

$^{13}\text{C}$  NMR (126 MHz,  $\text{CDCl}_3$ )  $\delta$  150.5, 84.4, 58.3, 45.9, 31.3, 28.0, 27.5, 25.7, 22.5, 15.0, 14.0.

IR (neat)  $\nu$  2934 (w), 2860 (w), 1731 (m), 1458 (w), 1383 (m), 1368 (m), 1331 (w), 1282 (m), 1254 (m), 1185 (m), 1137 (s), 1087 (w), 1041 (w), 997 (m), 954 (m), 844 (m), 770 (m), 720 (m), 646 (m), 590 (m), 559 (m), 465 (w)  $\text{cm}^{-1}$ .

TLC  $R_f = 0.50$  in 9:1 hexanes:EtOAc.

HRMS (ESI)  $m/z$ :  $[\text{M} + \text{Na}]^+$  Calcd for  $\text{C}_{13}\text{H}_{27}\text{ClN}_2\text{O}_4\text{S}\cdot\text{Na}$  365.1272; Found 365.1274.

### *N*-tert-Butoxycarbonyl-*N'*-chloro-*N'*-hexyl-*N*-(2,2,2-trifluoro)ethylsulfamide (**5b**)

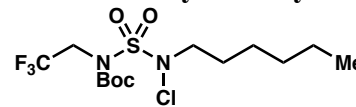 Prepared from sulfamide **S7b** (181 mg, 0.5 mmol) and TCICA (139 mg, 0.6 mmol) in  $\text{CH}_2\text{Cl}_2$  (5 mL) following general procedure G. The product was obtained as a colorless oil (191 mg, 96% yield) after silica gel column chromatography (Gradient: 100% hexanes  $\rightarrow$  20:1 hexanes/EtOAc).

$^1\text{H}$  NMR (400 MHz,  $\text{CDCl}_3$ )  $\delta$  4.42 (q,  $J = 8.1$  Hz, 2H), 3.67 (dd,  $J = 7.0$  Hz, 2H), 1.75–1.68 (m, 2H), 1.54 (s, 9H), 1.38–1.30 (m, 6H), 0.90 (t,  $J = 6.7$  Hz, 3H).

$^{13}\text{C}$  NMR (126 MHz,  $\text{CDCl}_3$ )  $\delta$  149.5, 123.2 (q,  $J = 280$  Hz), 86.2, 58.7, 49.3 (q,  $J = 36.3$  Hz), 31.2, 27.7, 27.5, 25.6, 22.4, 13.9.

$^{19}\text{F}$  NMR (376 MHz,  $\text{CDCl}_3$ )  $\delta$  -70.54 (t,  $J = 8.2$  Hz).

IR (neat)  $\nu$  2935 (w), 1746 (m), 1459 (w), 1389 (m), 1371 (m), 1338 (m), 1296 (w), 1250 (m), 1139 (s), 1046 (m), 1027 (m), 909 (w), 847 (w), 831 (w), 797 (w), 772 (w), 728 (w), 711 (m), 680 (w), 646 (w), 611 (m), 580 (m), 567 (m), 529 (w), 463 (w)  $\text{cm}^{-1}$ .

TLC  $R_f = 0.50$  in 9:1 hexanes:EtOAc.

HRMS (ESI)  $m/z$ :  $[\text{M} + \text{NH}_4]^+$  Calcd for  $\text{C}_{13}\text{H}_{24}\text{ClF}_3\text{N}_2\text{O}_4\text{S}\cdot\text{NH}_4$  414.1436; Found 414.1444.

### *N*-tert-Butoxycarbonyl-*N'*-tert-butyl-*N'*-chloro-*N*-neopentylsulfamide (**1a**)

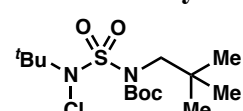 Prepared from sulfamide **S8a** (322 mg, 1.0 mmol) and TCICA (279 mg, 1.2 mmol) in  $\text{CH}_2\text{Cl}_2$  (5 mL) following general procedure G. The product was obtained as a white solid (158 mg, 44% yield) after silica gel column chromatography (Gradient: 100% hexanes  $\rightarrow$  50:1 hexanes/EtOAc).

$^1\text{H}$  NMR (400 MHz,  $\text{CDCl}_3$ )  $\delta$  3.71 (s, 2H), 1.54 (s, 9H), 1.52 (s, 9H), 0.93 (s, 9H).

$^{13}\text{C}$  NMR (101 MHz,  $\text{CDCl}_3$ )  $\delta$  151.0, 84.1, 68.3, 59.4, 33.3, 28.9, 27.8, 27.6.

IR (neat)  $\nu$  2968 (w), 1737 (m), 1478 (w), 1380 (m), 1365 (s), 1334 (w), 1278 (m), 1252 (m), 1186 (m), 1146 (s), 1073 (m), 1039 (w), 1004 (m), 871 (m), 849 (m), 819 (m), 800 (m), 771 (m), 731 (w), 656 (m), 587 (w)  $\text{cm}^{-1}$ .

TLC  $R_f = 0.56$  in 9:1 hexanes:EtOAc.

HRMS (ESI)  $m/z$ :  $[\text{M} + \text{Na}]^+$  Calcd for  $\text{C}_{14}\text{H}_{29}\text{ClN}_2\text{O}_4\text{S}\cdot\text{Na}$  379.1429; Found 379.1429.

### *N*-tert-Butoxycarbonyl-*N*-butyl-*N'*-tert-butyl-*N'*-chlorosulfamide (**1b**)

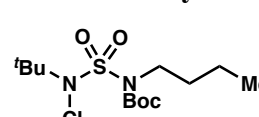 Prepared from sulfamide **S8b** (308 mg, 1.0 mmol) and TCICA (279 mg, 1.2 mmol) in  $\text{CH}_2\text{Cl}_2$  (5 mL) following general procedure G. The product was obtained as a colorless oil (258 mg, 75% yield) after silica gel column chromatography (Gradient: 100% hexanes  $\rightarrow$  50:1 hexanes/EtOAc).

$^1\text{H}$  NMR (400 MHz,  $\text{CDCl}_3$ )  $\delta$  3.75 (dd,  $J = 7.6, 7.6$  Hz, 2H), 1.70–1.62 (m, 2H), 1.53 (s, 9H), 1.53 (s, 9H), 1.38–1.29 (m, 2H), 0.92 (t,  $J = 7.3$  Hz, 3H).

$^{13}\text{C}$  NMR (126 MHz,  $\text{CDCl}_3$ )  $\delta$  150.3, 84.1, 68.3, 50.1, 31.8, 29.0, 28.0, 19.8, 13.7.

IR (neat)  $\nu$  2979 (w), 2938 (w), 2877 (w), 1715 (s), 1466 (w), 1440 (w), 1382 (m), 1367 (s), 1336 (m), 1294 (s), 1257 (m), 1184 (m), 1148 (s), 1046 (m), 1021 (m), 1009 (m), 925 (m), 875 (m), 848 (s), 830 (m), 770 (m), 763 (m), 731 (m), 648 (s), 581 (s), 548 (m)  $\text{cm}^{-1}$ .

TLC  $R_f = 0.47$  in 9:1 hexanes:EtOAc.

HRMS (ESI)  $m/z$ :  $[\text{M} + \text{Na}]^+$  Calcd for  $\text{C}_{13}\text{H}_{27}\text{ClN}_2\text{O}_4\text{S}\cdot\text{Na}$  365.1272; Found 365.1281.

### *N*-tert-Butoxycarbonyl-*N'*-tert-butyl-*N'*-chloro-*N*-isopentylsulfamide (**1c**)

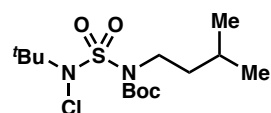

Prepared from sulfamide **S8c** (208 mg, 0.65 mmol) and TCICA (180 mg, 0.77 mmol) in  $\text{CH}_2\text{Cl}_2$  (3.2 mL) following general procedure G. The product was isolated as a white solid (161 mg, 70% yield) after silica gel column chromatography (95:5 hexanes/EtOAc).

$^1\text{H}$  NMR (500 MHz,  $\text{C}_6\text{D}_6$ )  $\delta$  3.90–3.86 (m, 2H), 1.68–1.62 (m, 2H), 1.47–1.42 (m, 1H), 1.35 (s, 9H) 1.33 (s, 9H), 0.76 (d,  $J = 6.6$  Hz, 6H).

$^{13}\text{C}$  NMR (126 MHz,  $\text{CDCl}_3$ )  $\delta$  150.3, 84.1, 68.4, 49.0, 38.5, 29.0, 28.0, 26.0, 22.4.

IR (neat)  $\nu$  2957 (w), 2872 (w), 1728 (m), 1380 (m), 1366 (s), 1287 (m), 1257 (m), 1187 (m), 1146 (s), 1046 (m), 1022 (m), 873 (m), 771 (m), 745 (m), 730 (m)  $\text{cm}^{-1}$ .

TLC  $R_f = 0.53$  in 8:2 hexanes/EtOAc.

HRMS (ESI)  $m/z$ :  $[\text{M} + \text{Na}]^+$  Calcd for  $\text{C}_{14}\text{H}_{29}\text{ClN}_2\text{O}_4\text{S}\cdot\text{Na}$  379.1434; Found 379.1428.

### *N*-tert-Butoxycarbonyl-*N'*-tert-butyl-*N'*-chloro-*N*-(2-(cyclopentyl)eth-1-yl)sulfamide (**1d**)

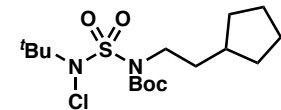

Prepared from sulfamide **S8d** (439 mg, 1.0 mmol) and TCICA (279 mg, 1.2 mmol) in  $\text{CH}_2\text{Cl}_2$  (5 mL) following general procedure G. The product was obtained as a colorless oil that solidified upon storage at  $-20$  °C (331 mg, 86% yield) after silica gel column chromatography (20:1 hexanes/EtOAc).

hexanes/EtOAc).

$^1\text{H}$  NMR (400 MHz,  $\text{CDCl}_3$ )  $\delta$  3.75 (dd,  $J = 7.7, 7.7$  Hz, 2H), 1.80–1.75 (m, 3H), 1.74–1.67 (m, 3H), 1.62–1.57 (m, 2H), 1.53 (s, 9H), 1.53 (s, 9H), 1.11–1.18 (m, 3H).

$^{13}\text{C}$  NMR (126 MHz,  $\text{CDCl}_3$ )  $\delta$  150.3, 84.1, 68.3, 49.8, 37.4, 36.0, 32.4, 29.0, 28.0, 25.1.

IR (neat)  $\nu$  2943 (w), 2867 (w), 1728 (m), 1454 (w), 1380 (m), 1366 (s), 1335 (m), 1286 (m), 1257 (m), 1187 (m), 1146 (s), 1046 (m), 978 (w), 873 (m), 849 (m), 771 (m), 747 (w), 731 (w), 634 (m), 611 (m), 586 (m)  $\text{cm}^{-1}$ .

TLC  $R_f = 0.57$  in 9:1 hexanes:EtOAc.

HRMS (ESI)  $m/z$ :  $[\text{M} + \text{Na}]^+$  Calcd for  $\text{C}_{16}\text{H}_{31}\text{ClN}_2\text{O}_4\text{S}\cdot\text{Na}$  405.1585; Found 405.1580.

### *N*-tert-Butoxycarbonyl-*N'*-tert-butyl-*N'*-chloro-*N*-(2-(cyclohexyl)eth-1-yl)sulfamide (**1e**)

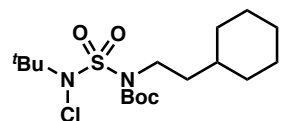

Prepared from sulfamide **S8e** (363 mg, 1.0 mmol) and TCICA (279 mg, 1.2 mmol) in  $\text{CH}_2\text{Cl}_2$  (5 mL) following general procedure G. The product was obtained as a colorless oil (293 mg, 74% yield) after silica gel column chromatography (Gradient: 100% hexanes  $\rightarrow$  50:1 hexanes/EtOAc).

hexanes/EtOAc).

$^1\text{H}$  NMR (400 MHz,  $\text{CDCl}_3$ )  $\delta$  3.79–3.75 (m, 2H), 1.74–1.65 (m, 7H), 1.53 (s, 9H), 1.52 (s, 9H), 1.23–1.13 (m, 4H), 0.98–0.90 (m, 2H).

$^{13}\text{C}$  NMR (126 MHz,  $\text{CDCl}_3$ )  $\delta$  150.2, 84.0, 68.2, 48.5, 37.0, 35.4, 33.0, 28.9, 27.9, 26.4, 26.1.

IR (neat)  $\nu$  2979 (w), 2923 (m), 2851(w), 1730 (m), 1449 (w), 1380 (m), 1367 (s), 1334 (w), 1310 (w), 1287 (m), 1257 (m), 1185 (m), 1146 (s), 1043 (w), 1025 (w), 966 (m), 870 (m), 850 (m), 829 (m), 771 (m), 730 (w), 648 (m), 601 (m), 586 (m), 554 (w)  $\text{cm}^{-1}$ .

TLC  $R_f$  = 0.63 in 4:1 hexanes:EtOAc

HRMS (ESI)  $m/z$ :  $[\text{M} + \text{Na}]^+$  Calcd for  $\text{C}_{17}\text{H}_{33}\text{ClN}_2\text{O}_4\text{S}\cdot\text{Na}$  419.1742; Found 419.1738.

***N*-tert-Butoxycarbonyl-*N'*-tert-butyl-*N'*-chloro-*N*-((2*R*)-methyl 4-methylpentano-2-yl)sulfamide (1f)**

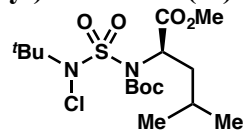

Prepared from sulfamide **S8f** (280 mg, 0.74 mmol) and TCICA (205 mg, 0.88 mmol) in  $\text{CH}_2\text{Cl}_2$  (3.7 mL) following general procedure G. The product was obtained as a colorless oil (228 mg, 75% yield) after purification on a Teledyne Isco CombiFlash $R_f$  system using a Redi Sep  $R_f$  normal phase silica gel column (9:1 hexanes/EtOAc).

$^1\text{H}$  NMR (400 MHz,  $\text{CDCl}_3$ )  $\delta$  4.77 (dd,  $J$  = 7.1, 5.5 Hz, 1H), 3.74 (s, 3H), 2.22 (ddd,  $J$  = 13.9, 6.8, 6.8 Hz, 1H), 1.92–1.82 (m, 1H), 1.70 (ddd,  $J$  = 14.0, 7.2, 5.4 Hz, 1H), 1.56 (s, 9H), 1.50 (s, 9H), 0.96 (t,  $J$  = 7.0 Hz, 6H).

$^{13}\text{C}$  NMR (101 MHz,  $\text{CDCl}_3$ )  $\delta$  170.5, 149.4, 84.9, 69.2, 59.8, 52.3, 40.4, 29.0, 27.8, 25.7, 22.6, 22.3.

IR (neat)  $\nu$  2956 (w), 2871 (w), 1746 (m), 1459 (w), 1382 (m), 1366 (s), 1295 (m), 1236 (m), 1209 (m), 1186 (m), 1143 (s), 1044 (m), 1029 (m), 986 (w), 948 (w), 919 (w), 868 (m), 835 (m), 770 (m), 723 (m), 664 (w), 613 (s), 589 (m)  $\text{cm}^{-1}$ .

TLC  $R_f$  = 0.49 in 8:2 hexanes:EtOAc.

HRMS (ESI)  $m/z$ :  $[\text{M} + \text{Na}]^+$  Calcd for  $\text{C}_{16}\text{H}_{31}\text{ClN}_2\text{O}_6\text{S}\cdot\text{Na}$  437.1489; Found 437.1485.

***N*-tert-Butoxycarbonyl-*N'*-tert-butyl-*N'*-chloro-*N*-((*S*)-2-(1,3-dioxoisindolin-2-yl)-3-methylbutyl)sulfamide (1g)**

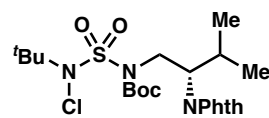

Prepared from sulfamide **S8g** (468 mg, 1.0 mmol) and TCICA (279 mg, 1.2 mmol) in  $\text{CH}_2\text{Cl}_2$  (5 mL) following general procedure G. The product was obtained as a white foam (403 mg, 80% yield) after silica gel column chromatography (Gradient: 20:1 hexanes:EtOAc  $\rightarrow$  9:1 hexanes/EtOAc).

$^1\text{H}$  NMR (400 MHz,  $\text{CDCl}_3$ )  $\delta$  7.84 (dd,  $J$  = 3.1, 5.3 Hz, 2H), 7.68 (dd,  $J$  = 3.1, 5.3 Hz, 2H), 4.44 (dd,  $J$  = 10.8, 14.5, 1H), 4.17 (ddd,  $J$  = 2.5, 2.5, 10.8, 1H), 4.09 (dd,  $J$  = 2.5, 14.5 Hz, 1H), 2.64–2.55 (m, 1H), 1.45 (s, 9H), 1.43 (s, 9H), 1.15 (d,  $J$  = 6.6 Hz, 3H), 0.84 (d,  $J$  = 6.6 Hz, 3H).

$^{13}\text{C}$  NMR (126 MHz,  $\text{CDCl}_3$ )  $\delta$  168.4, 149.8, 133.6, 131.9, 131.4, 123.1, 122.8, 84.5, 68.2, 57.3, 49.3, 28.7, 27.7, 27.2, 20.3, 20.0.

IR (neat)  $\nu$  2976 (w), 1776 (w), 1713 (s), 1468 (w), 1384 (m), 1368 (m), 1318 (w), 1288 (w), 1258 (w), 1189 (w), 1150 (m), 1064 (w), 1009 (w), 991 (w), 875 (w), 845 (w), 771 (w), 722 (m), 644 (w), 588 (w), 530 (w)  $\text{cm}^{-1}$ .

TLC  $R_f$  = 0.33 in 4:1 hexanes:EtOAc

HRMS (ESI)  $m/z$ :  $[\text{M} + \text{NH}_4]^+$  Calcd for  $\text{C}_{22}\text{H}_{32}\text{ClN}_3\text{O}_6\text{S}\cdot\text{NH}_4$  519.2039; Found 519.2045.

***N*-tert-Butoxycarbonyl-*N'*-tert-butyl-*N'*-chloro-*N*-(3,7-dimethyloct-1-yl)sulfamide (1h)**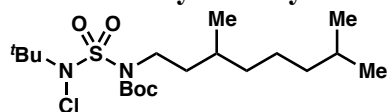

Prepared from sulfamide **S8h** (709 mg, 1.8 mmol) and TCICA (504 mg, 2.2 mmol) in CH<sub>2</sub>Cl<sub>2</sub> (9 mL) following general procedure G. The product was isolated as a colorless oil (662 mg, 86% yield) after purification on a Teledyne Isco

CombiFlashR<sub>f</sub> system using a Redi Sep R<sub>f</sub> normal phase silica gel column (95:5 hexanes/EtOAc).

<sup>1</sup>H NMR (400 MHz, CDCl<sub>3</sub>) δ 3.79–3.70 (m, 2H), 1.75–1.67 (m, 2H), 1.57–1.48 (m, 19H), 1.33–1.22 (m, 4H), 1.16–1.11 (m, 3H), 0.91 (d, *J* = 6.4 Hz, 3H), 0.86 (d, *J* = 6.7 Hz, 6H).

<sup>13</sup>C NMR (126 MHz, CDCl<sub>3</sub>) δ 150.2, 84.0, 68.3, 48.8, 39.1, 37.0, 36.7, 30.8, 29.0, 28.0, 27.9, 24.6, 22.7, 22.6, 19.4.

IR (neat) ν 2954 (w), 2928 (w), 2869 (w), 1730 (m), 1458 (w), 1380 (m), 1366 (s), 1284 (m), 1257 (m), 1147 (s), 1042 (w), 1018 (w), 957 (w), 873 (m), 850 (m), 771 (w), 731 (m), 645 (m), 586 (m) cm<sup>-1</sup>.

TLC R<sub>f</sub> = 0.66 in 8:2 hexanes/EtOAc.

HRMS (ESI) *m/z*: [M + Na]<sup>+</sup> Calcd for C<sub>19</sub>H<sub>39</sub>ClN<sub>2</sub>O<sub>4</sub>S•Na 449.2216; Found 449.2213.

***N*-tert-Butoxycarbonyl-*N'*-tert-butyl-*N'*-chloro-*N*-pentylsulfamide (1i)**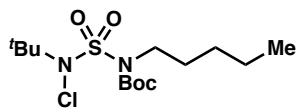

Prepared from sulfamide **S8i** (500 mg, 1.55 mmol) and TCICA (432 mg, 1.86 mmol, 1.20 equiv) in CH<sub>2</sub>Cl<sub>2</sub> (8.3 mL) following general procedure G. The product was isolated as a colorless oil (503 mg, 91% yield) after purification on Florisil by solid deposition (95:5

hexanes/EtOAc).

<sup>1</sup>H NMR (400 MHz, CDCl<sub>3</sub>) δ 3.76–3.72 (m, 2H), 1.72–1.64 (m, 2H), 1.53 (s, 9H), 1.53 (s, 9H), 1.38–1.26 (m, 4H), 0.89 (t, *J* = 7.0 Hz, 3H).

<sup>13</sup>C NMR (126 MHz, CDCl<sub>3</sub>) δ 150.3, 84.1, 68.3, 50.2, 29.3, 28.9, 28.7, 28.0, 22.2, 13.9.

IR (neat) ν 2958 (w), 2934 (w), 2872 (w), 1729 (m), 1458 (w), 1380 (m), 1366 (s), 1333 (w), 1282 (m), 1256 (m), 1186 (m), 1147 (m), 1043 (m), 1017 (m), 962 (w), 874 (m), 848 (m), 823 (m), 770 (m), 727 (m), 644 (m), 633 (m), 585 (s) cm<sup>-1</sup>.

TLC R<sub>f</sub> = 0.49 in 9:1 hexanes/EtOAc.

HRMS (ESI) *m/z*: [M + Na]<sup>+</sup> Calcd for C<sub>14</sub>H<sub>29</sub>ClN<sub>2</sub>O<sub>4</sub>S•Na 379.1434; Found 379.1427.

***N*-tert-Butoxycarbonyl-*N'*-tert-butyl-*N'*-chloro-*N*-hexylsulfamide (1j)**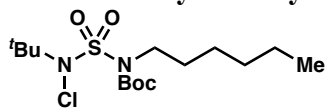

Prepared from sulfamide **S8j** (336 mg, 1.0 mmol) and TCICA (279 mg, 1.2 mmol) in CH<sub>2</sub>Cl<sub>2</sub> (5 mL) following general procedure G. The product was obtained as a colorless oil (291 mg, 79% yield) after

silica gel column chromatography (Gradient: 100% hexanes → 50:1 hexanes/EtOAc).

<sup>1</sup>H NMR (400 MHz, CDCl<sub>3</sub>) δ 3.74 (dd, *J* = 7.6, 7.6 Hz, 2H), 1.69–1.65 (m, 2H), 1.53 (s, 9H), 1.53 (s, 9H), 1.32–1.27 (m, 6H), 0.87 (t, *J* = 6.7 Hz, 3H).

<sup>13</sup>C NMR (101 MHz, CDCl<sub>3</sub>) δ 150.3, 84.1, 68.3, 50.3, 31.3, 29.6, 28.9, 28.0, 26.2, 22.5, 14.0.

IR (neat) ν 2932 (w), 2859 (w), 1729 (m), 1458 (w), 1381 (m), 1367 (s), 1333 (w), 1285 (m), 1257 (m), 1185 (m), 1148 (s), 1046 (m), 984 (w), 912 (w), 873 (m), 849 (m), 770 (m), 731 (s), 646 (m), 634 (m), 587 (s) cm<sup>-1</sup>.

TLC  $R_f$  = 0.57 in 9:1 hexanes:EtOAc.

HRMS (ESI)  $m/z$ :  $[M + Na]^+$  Calcd for  $C_{15}H_{31}ClN_2O_4S \cdot Na$  393.1585; Found 393.1585.

***N*-tert-Butyloxycarbonyl-*N'*-tert-butyl-*N'*-chloro-*N*-(methyl hexano-6-yl)sulfamide (1k)**

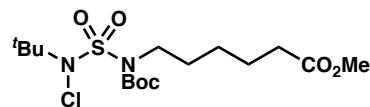

Prepared from sulfamide **S8k** (266 mg, 0.7 mmol) and TCICA (195 mg, 0.84 mmol) in  $CH_2Cl_2$  (3.5 mL) following general procedure G. The product was obtained as a colorless oil (217 mg, 75% yield) after silica gel column chromatography (Gradient:

100% hexanes  $\rightarrow$  9:1 hexanes/EtOAc).

$^1H$  NMR (400 MHz,  $CDCl_3$ )  $\delta$  3.74 (d,  $J$  = 7.4, 7.4 Hz, 2H), 3.65 (s, 3H), 2.31 (t,  $J$  = 7.5 Hz, 2H), 1.72–1.61 (m, 4H), 1.53 (s, 9H), 1.52 (s, 9H), 1.38–1.30 (m, 2H).

$^{13}C$  NMR (101 MHz,  $CDCl_3$ )  $\delta$  173.9, 150.3, 84.2, 68.4, 51.4, 49.9, 33.9, 29.3, 28.9, 28.0, 26.0, 24.4.

IR (neat)  $\nu$  2981 (w), 2940 (w), 1279 (s), 1437 (w), 1380 (m), 1366 (s), 1335 (w), 1285 (m), 1257 (m), 1146 (s), 1042 (w), 1009 (w), 874 (m), 848 (m), 770 (w), 730 (m), 634 (m), 586 (s)  $cm^{-1}$ .

TLC  $R_f$  = 0.44 in 4:1 hexanes:EtOAc.

HRMS (ESI)  $m/z$ :  $[M + NH_4]^+$  Calcd for  $C_{16}H_{31}ClN_2O_6S \cdot NH_4$  432.1930; Found 432.1937.

***N*-Acetyl-*N'*-tert-butyl-*N'*-chloro-*N*-hexylsulfamide (1l)**

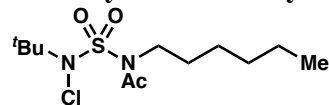

Prepared from sulfamide **S8l** (278 mg, 1.0 mmol) and  $tBuOCl$  (217 mg, 2.0 mmol) in  $CH_2Cl_2$  (5 mL) following general procedure H. The product was obtained as a colorless oil (235 mg, 75% yield) after silica gel column chromatography (Gradient: 100% hexanes  $\rightarrow$  50:1 hexanes/EtOAc).

$^1H$  NMR (400 MHz,  $CDCl_3$ )  $\delta$  3.78 (dd,  $J$  = 7.8, 7.8 Hz, 2H), 2.54 (s, 3H), 1.66–1.59 (m, 2H), 1.55 (s, 9H), 1.26–1.31 (m, 6H), 0.88 (t,  $J$  = 6.8 Hz, 3H).

$^{13}C$  NMR (126 MHz,  $C_6D_6$ )  $\delta$  169.5, 68.5, 49.1, 31.6, 29.4, 28.7, 26.7, 24.6, 22.8, 14.1.

$^{13}C$  NMR (101 MHz,  $CDCl_3$ )  $\delta$  170.2, 68.9, 49.0, 31.3, 28.9, 26.3, 24.7, 22.5, 14.0.

IR (neat)  $\nu$  2931 (w), 2858 (w), 1709 (m), 1462 (w), 1400 (w), 1365 (s), 1329 (w), 1232 (m), 1177 (s), 1162 (s), 1092 (m), 1040 (w), 948 (m), 912 (w), 864 (m), 823 (m), 781 (m), 732 (m), 709 (w), 678 (w), 649 (w), 602 (s), 583 (s), 554 (m)  $cm^{-1}$ .

TLC  $R_f$  = 0.43 in 9:1 hexanes:EtOAc.

HRMS (ESI)  $m/z$ :  $[M + Na]^+$  Calcd for  $C_{12}H_{25}ClN_2O_3S \cdot Na$  335.1167; Found 335.1175.

***N*-tert-Butyl-*N*-chloro-*N'*-hexyl-*N'*-(2,2,2-trifluoroethyl)sulfamide (1m)**

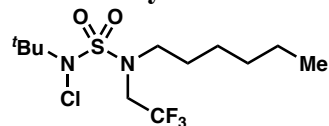

Prepared from sulfamide **S8m** (318 mg, 1.0 mmol) and TCICA (279 mg, 1.2 mmol) in  $CH_2Cl_2$  (5 mL) following general procedure G. The product was obtained as a colorless oil (318 mg, 90% yield) after silica gel column chromatography (Gradient: 100% hexanes  $\rightarrow$  50:1 hexanes/EtOAc).

$^1H$  NMR (400 MHz,  $CDCl_3$ )  $\delta$  3.93 (q,  $J$  = 8.7 Hz, 2H), 3.38 (dd,  $J$  = 8.1, 8.1 Hz, 2H), 1.73–1.65 (m, 2H), 1.50 (s, 9H), 1.34–1.28 (m, 6H), 0.89 (t,  $J$  = 6.8 Hz, 3H).



$^{13}\text{C}$  NMR (126 MHz,  $\text{CDCl}_3$ )  $\delta$  123.8 (q,  $J = 280.1$  Hz), 67.7, 50.8, 50.5 (q,  $J = 35.2$  Hz), 31.2, 28.9, 26.8, 26.2, 22.5, 13.9.

$^{19}\text{F}$  NMR (376 MHz,  $\text{CDCl}_3$ )  $\delta$  -70.11 (t,  $J = 8.7$  Hz).

IR (neat)  $\nu$  2933 (w), 2860 (w), 1466 (w), 1399 (w), 1359 (m), 1314 (w), 1274 (m), 1238 (w), 1151 (s), 1119 (m), 1043 (m), 994 (m), 875 (m), 820 (m), 785 (m), 733 (m), 663 (m), 603 (m), 564 (m)  $\text{cm}^{-1}$ .

TLC  $R_f = 0.57$  in 9:1 hexanes:EtOAc.

HRMS (ESI)  $m/z$ :  $[\text{M} + \text{NH}_4]^+$  Calcd for  $\text{C}_{12}\text{H}_{24}\text{ClF}_3\text{N}_2\text{O}_2\text{S}\cdot\text{NH}_4$  370.1537; Found 370.1539.

### *N'*-*tert*-Butyl-*N'*-chloro-*N*'-trifluoroacetyl-*N*-pentylsulfamide (**1n**)

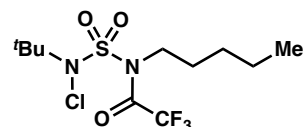

Prepared from sulfamide **S8n** (284 mg, 0.89 mmol) and  $t\text{BuOCl}$  (4.2 mL, 37.2 mmol, 2 x 21 equiv portions, 2<sup>nd</sup> portion added after 24 h) following general procedure H. The product was isolated as a colorless oil (273 mg, 87% yield) without purification.

$^1\text{H}$  NMR (400 MHz,  $\text{CDCl}_3$ )  $\delta$  3.87–3.82 (m, 2H), 1.78–1.72 (m, 2H), 1.57 (s, 9H), 1.38–1.28 (m, 4H), 0.91 (t,  $J = 7.0$  Hz, 3H).

$^{13}\text{C}$  NMR (126 MHz,  $\text{CDCl}_3$ )  $\delta$  155.8 (q,  $J = 40.4$  Hz), 115.3 (q,  $J = 291.0$  Hz), 70.3, 50.1, 29.5, 29.0, 28.5, 22.0, 13.8.

$^{19}\text{F}$  NMR (376 MHz,  $\text{CDCl}_3$ )  $\delta$  -69.75.

IR (neat)  $\nu$  2960 (w), 2874 (w), 1741 (m), 1464 (w), 1390 (m), 1371 (m), 1231 (m), 1209 (m), 1155 (s), 1128 (s), 1060 (m), 969 (w), 874 (m), 874 (m), 754 (m), 715 (m), 688 (m), 615 (s), 581 (m), 537 (m)  $\text{cm}^{-1}$ .

TLC  $R_f = 0.29$  in 98:2 hexanes/EtOAc.

HRMS (ESI)  $m/z$ :  $[\text{M} - \text{H}]^-$  Calcd for  $\text{C}_{11}\text{H}_{19}\text{ClF}_3\text{N}_2\text{O}_3\text{S}$  351.0757; Found 351.0764.

### *N*-*tert*-Butoxycarbonyl-*N'*-chloro-*N'*-(2,2,2-trifluoroethyl)-*N*-hexylsulfamide (**1o**)

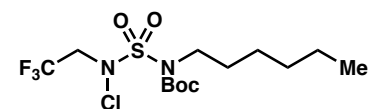

Prepared from sulfamide **S8o** (382 mg, 1.0 mmol) and TCICA (279 mg, 1.2 mmol) in  $\text{CH}_2\text{Cl}_2$  (5 mL) following general procedure G. The product was obtained as a colorless oil (378 mg, 95% yield) after silica gel column chromatography (Gradient:

100% hexanes  $\rightarrow$  50:1 hexanes/EtOAc).

$^1\text{H}$  NMR (400 MHz,  $\text{CDCl}_3$ )  $\delta$  4.28 (q,  $J = 8.2$  Hz, 2H), 3.74 (dd,  $J = 7.7, 7.7$  Hz, 2H), 1.75–1.68 (m, 2H), 1.54 (s, 9H), 1.36–1.27 (m, 6H), 0.90 (t,  $J = 6.7$  Hz, 3H).

$^{13}\text{C}$  NMR (126 MHz,  $\text{CDCl}_3$ )  $\delta$  150.8, 123.2 (q,  $J = 279.3$  Hz), 85.2, 59.5 (q,  $J = 36.1$  Hz), 50.8, 31.3, 29.5, 27.9, 26.1, 22.5, 13.9.

$^{19}\text{F}$  NMR (376 MHz,  $\text{CDCl}_3$ )  $\delta$  -71.64 (t,  $J = 8.3$  Hz).

IR (neat)  $\nu$  2934 (w), 2860 (w), 1730 (m), 1458 (w), 1382 (m), 1372 (m), 1338 (w), 1305 (m), 1274 (m), 1255 (m), 1137 (s), 1045 (w), 967 (m), 841 (m), 820 (m), 772 (w), 721 (s), 697 (m), 641 (w), 617 (w), 563 (s)  $\text{cm}^{-1}$ .

TLC  $R_f = 0.50$  in 9:1 hexanes:EtOAc.

HRMS (ESI)  $m/z$ :  $[\text{M} - \text{H}]^-$  Calcd for  $\text{C}_{13}\text{H}_{24}\text{ClF}_3\text{N}_2\text{O}_4\text{S}$  395.1025; Found 395.1023.

***N*-tert-Butyl-*N*-chloro-*N'*-(2,2,2-trifluoroethyl)sulfamide (1p)**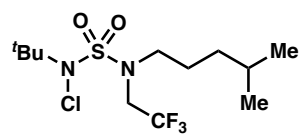

Prepared from sulfamide **S8p** (318 mg, 1.0 mmol) and TCICA (279 mg, 1.2 mmol) in CH<sub>2</sub>Cl<sub>2</sub> (5 mL) following general procedure G. The product was obtained as a colorless oil (306 mg, 87% yield) after silica gel column chromatography (Gradient: 100% hexanes → 50:1 hexanes/EtOAc).

<sup>1</sup>H NMR (400 MHz, CDCl<sub>3</sub>) δ 3.93 (q, *J* = 8.5 Hz, 2H), 3.37 (dd, *J* = 7.7, 7.7 Hz, 2H), 1.74–1.66 (m, 2H), 1.61–1.54 (m, 1H), 1.49 (s, 9H), 1.20–1.15 (m, 2H), 0.90 (d, *J* = 6.6 Hz, 6H).

<sup>13</sup>C NMR (126 MHz, CDCl<sub>3</sub>) δ 123.8 (q, *J* = 280.1 Hz), 67.7, 51.0, 50.4 (q, *J* = 35.5 Hz), 35.6, 28.9, 27.6, 24.7, 22.4.

<sup>19</sup>F NMR (376 MHz, CDCl<sub>3</sub>) δ –70.13 (t, *J* = 8.7 Hz).

IR (neat) ν 2957 (w), 2873 (w), 1466 (w), 1360 (m), 1313 (m), 1275 (m), 1238 (w), 1180 (m), 1152 (s), 1120 (m), 1042 (m), 991 (m), 875 (m), 822 (m), 786 (m), 765 (w), 735 (w), 663 (m), 604 (m), 564 (m) cm<sup>-1</sup>.

TLC R<sub>f</sub> = 0.57 in 9:1 hexanes:EtOAc.

HRMS (ESI) *m/z*: [M + H]<sup>+</sup> Calcd for C<sub>12</sub>H<sub>24</sub>ClF<sub>3</sub>N<sub>2</sub>O<sub>2</sub>S 353.1272; Found 353.1279.

***N*-tert-Butoxycarbonyl-*N'*-tert-butyl-*N*-chloro-*N*-4-methylpentylsulfamide (1q)**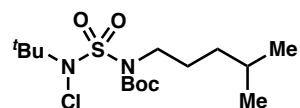

Prepared from sulfamide **S8q** (336 mg, 1.0 mmol) and TCICA (279 mg, 1.2 mmol) in CH<sub>2</sub>Cl<sub>2</sub> (5 mL) following general procedure G. The product was obtained as a white solid (284 mg, 77% yield) after silica gel column chromatography (Gradient: 100% hexanes → 50:1 hexanes/EtOAc).

<sup>1</sup>H NMR (400 MHz, CDCl<sub>3</sub>) δ 3.72 (dd, *J* = 7.4 Hz, 2H), 1.71–1.64 (m, 3H), 1.53 (s, 9H), 1.52 (s, 9H), 1.20–1.15 (m, 2H), 0.87 (d, *J* = 6.6 Hz, 6H).

<sup>13</sup>C NMR (126 MHz, CDCl<sub>3</sub>) δ 150.3, 84.1, 68.3, 50.5, 35.6, 29.0, 28.0, 27.6, 27.5, 22.5.

IR (neat) ν 2956 (w), 2871 (w), 1729 (m), 1458 (w), 1380 (m), 1366 (s), 1331 (w), 1284 (m), 1257 (m), 1186 (m), 1147 (s), 1048 (m), 981 (m), 874 (m), 793 (m), 771 (m), 730 (m), 645 (m), 634 (m), 586 (s) cm<sup>-1</sup>.

TLC R<sub>f</sub> = 0.55 in 9:1 hexanes:EtOAc.

HRMS (ESI) *m/z*: [M + Na]<sup>+</sup> Calcd for C<sub>15</sub>H<sub>31</sub>ClN<sub>2</sub>O<sub>4</sub>S•Na 393.1585; Found 393.1587.

***N*-tert-Butoxycarbonyl-*N'*-chloro-*N*-4-methylpentyl-*N'*-(2,2,2-trifluoroethyl)sulfamide (1r)**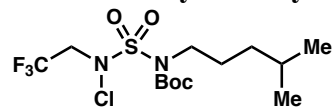

Prepared from sulfamide **S8r** (362 mg, 1.0 mmol) and TCICA (279 mg, 1.2 mmol) in CH<sub>2</sub>Cl<sub>2</sub> (5 mL) following general procedure G. The product was obtained as a colorless oil (357 mg, 90% yield) after silica gel column chromatography (Gradient: 100% hexanes → 50:1 hexanes/EtOAc).

<sup>1</sup>H NMR (400 MHz, CDCl<sub>3</sub>) δ 4.28 (q, *J* = 8.2 Hz, 2H), 3.72 (dd, *J* = 7.7, 7.7 Hz, 2H), 1.75–1.68 (m, 2H), 1.59–1.55 (m, 1H), 1.54 (s, 9H), 1.22–1.16 (m, 2H), 0.89 (d, *J* = 6.5 Hz, 6H).

<sup>13</sup>C NMR (101 MHz, CDCl<sub>3</sub>) δ 150.8, 123.2 (q, *J* = 279.4 Hz), 85.2, 59.5 (q, *J* = 35.4 Hz), 50.9, 35.5, 27.8, 27.5, 27.4, 22.4.

<sup>19</sup>F NMR (376 MHz, CDCl<sub>3</sub>) δ –71.56 (t, *J* = 8.3 Hz).

IR (neat)  $\nu$  2958 (w), 2872 (w), 1730 (m), 1459 (w), 1382 (m), 1371 (m), 1335 (w), 1305 (m), 1274 (m), 1138 (s), 1047 (w), 967 (m), 841 (m), 822 (m), 794 (m), 772 (w), 721 (s), 697 (m), 641 (w), 617 (w), 563 (s)  $\text{cm}^{-1}$ .

TLC  $R_f$  = 0.49 in 9:1 hexanes:EtOAc.

HRMS (ESI)  $m/z$ :  $[M + H]^+$  Calcd for  $\text{C}_{13}\text{H}_{24}\text{ClF}_3\text{N}_2\text{O}_4\text{S}$  397.1170; Found 397.1166.

#### *N*-tert-Butoxycarbonyl-*N'*-tert-butyl-*N*-(tert-butyl butano-4-yl)-*N'*-chlorosulfamide (**S9t**)

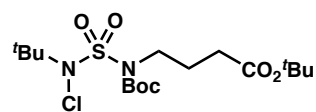

Following a modified literature procedure,<sup>6</sup> a flame-dried round bottom flask equipped with a stir bar and shielded from light with aluminum foil was charged with sulfamide **S8t** (200 mg, 0.51 mmol, 1.0 equiv) by brief removal of the septum. The septum was tightly replaced and the flask was sequentially charged with EtOAc (0.91 mL, 0.56 M), *t*BuOH (48  $\mu\text{L}$ , 0.51 mmol, 1.0 equiv), 0.9 M aqueous bleach solution (3.8 mL, 3.39 mmol, 6.7 equiv), and AcOH (0.29 mL, 5.07 mmol, 10 equiv) via syringe. The biphasic mixture was stirred until complete consumption of the starting material as was evident by TLC.

Upon complete consumption of the starting material as indicated by TLC, the reaction was diluted with EtOAc (19.7 mL/mmol of sulfamide) and the biphasic mixture was partitioned in a separatory funnel. The aqueous phase was separated and the organic phase was rinsed with saturated aqueous  $\text{NaHCO}_3$  solution (19.7 mL/mmol sulfamide), saturated aqueous  $\text{NaCl}$  solution (19.7 mL/mmol sulfamide), and  $\text{H}_2\text{O}$  (19.7 mL/mmol sulfamide). The organic phase was collected, dried over  $\text{Na}_2\text{SO}_4$ , filtered, & concentrated to afford the crude product. The product was isolated as a colorless oil (168 mg, 77% yield) after purification on a Teledyne Isco CombiFlash $R_f$  system using a Redi Sep  $R_f$  normal phase silica gel column (9:1 hexanes/EtOAc).

$^1\text{H}$  NMR (400 MHz,  $\text{CDCl}_3$ )  $\delta$  3.81 (t,  $J$  = 7.1 Hz, 2H), 2.26 (t,  $J$  = 7.5 Hz, 2H), 1.99–1.93 (m, 2H), 1.54 (s, 9H), 1.53 (s, 9H), 1.44 (s, 9H).

$^{13}\text{C}$  NMR (126 MHz,  $\text{CDCl}_3$ )  $\delta$  172.0, 150.2, 84.4, 80.3, 49.3, 32.5, 28.9, 28.0, 28.0, 25.0.

IR (neat)  $\nu$  2979 (w), 2935 (w), 1726 (s), 1457 (w), 1380 (m), 1365 (s), 1334 (w), 1285 (m), 1256 (m), 1143 (s), 1099 (m), 1040 (w), 997 (w), 874 (m), 847 (m), 769 (m), 730 (w), 632 (m), 586 (m)  $\text{cm}^{-1}$ .

TLC  $R_f$  = 0.61 in 8:2 hexanes/EtOAc.

HRMS (ESI)  $m/z$ :  $[M + \text{Na}]^+$  Calcd for  $\text{C}_{17}\text{H}_{33}\text{ClN}_2\text{O}_6\text{S}\cdot\text{Na}$  451.1645; Found 451.1644.

#### *N*-tert-Butoxycarbonyl-*N'*-tert-butyl-*N'*-chloro-*N*-(3-((4-trifluoromethyl)phenyl)prop-1-yl)sulfamide (**S9u**)

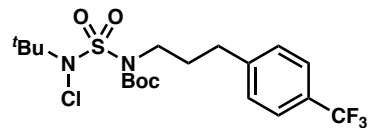

Prepared from sulfamide **S8u** (439 mg, 1.0 mmol) and TCICA (279 mg, 1.2 mmol) in  $\text{CH}_2\text{Cl}_2$  (5 mL, 0.2 M) following general procedure G. The product was obtained as colorless oil that solidified upon storage at  $-20\text{ }^\circ\text{C}$  (449 mg, 95% yield) after silica gel column chromatography (20:1 hexanes/EtOAc).

$^1\text{H}$  NMR (400 MHz,  $\text{CDCl}_3$ )  $\delta$  7.53 (d,  $J$  = 8.1 Hz, 2H), 7.31 (d,  $J$  = 8.1 Hz, 2H), 3.81 (t,  $J$  = 7.5 Hz, 2H), 2.71 (t,  $J$  = 7.9 Hz, 2H), 2.08–2.00 (m, 2H), 1.53 (s, 9H), 1.52 (s, 9H).

$^{13}\text{C}$  NMR (126 MHz,  $\text{CDCl}_3$ )  $\delta$  150.2, 145.3, 128.6, 128.3 (q,  $J$  = 32.4 Hz), 125.3 (q,  $J$  = 3.7 Hz), 124.3 (q,  $J$  = 271.6 Hz), 84.4, 68.5, 49.6, 32.7, 30.8, 28.9, 27.9.

$^{19}\text{F}$  NMR (376 MHz,  $\text{CDCl}_3$ )  $\delta$  -62.37.

IR (neat)  $\nu$  2985 (w), 1731 (w), 1618 (w), 1458 (w), 1380 (m), 1368 (m), 1324 (m), 1285 (w), 1265 (m), 1148 (m), 1121 (m), 1067 (m), 1018 (w), 996 (w), 951 (w), 875 (w), 843 (w), 798 (w), 782 (w), 734 (s), 704 (m), 627 (m), 587 (m)  $\text{cm}^{-1}$ .

TLC  $R_f$  = 0.5 in 9:1 hexanes:EtOAc.

HRMS (ESI)  $m/z$ :  $[\text{M} + \text{NH}_4]^+$  Calcd for  $\text{C}_{19}\text{H}_{28}\text{ClF}_3\text{N}_2\text{O}_4\text{S}\cdot\text{NH}_4$  490.1749; Found 490.1740.

***N*-tert-Butoxycarbonyl-*N'*-chloro-*N'*-(2,2,2-trifluoroethyl)-*N*-pentylsulfamide (S9v)**

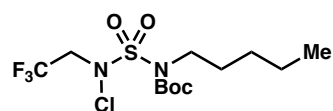

Prepared from sulfamide **S8v** (228 mg, 0.65 mmol) and TCICA (182 mg, 0.78 mmol) following general procedure G. The product was isolated as a colorless oil (229 mg, 92% yield) after purification on a Teledyne Isco CombiFlash $R_f$  system using a Redi Sep  $R_f$  normal phase silica gel column (9:1 hexanes/EtOAc).

$^1\text{H}$  NMR (400 MHz,  $\text{CDCl}_3$ )  $\delta$  4.28 (q,  $J$  = 8.2 Hz, 2H), 3.76–3.72 (m, 2H), 1.75–1.68 (m, 2H), 1.53 (s, 9H), 1.36–1.29 (m, 4H), 0.91 (t,  $J$  = 7.0 Hz, 3H).

$^{13}\text{C}$  NMR (126 MHz,  $\text{CDCl}_3$ )  $\delta$  150.8, 123.2 (q,  $J$  = 279.3 Hz), 85.2, 59.5 (q,  $J$  = 35.3 Hz), 50.7, 29.2, 28.6, 27.9, 22.2, 13.9.

$^{19}\text{F}$  NMR (376 MHz,  $\text{CDCl}_3$ )  $\delta$  -71.55 (t,  $J$  = 8.2 Hz).

IR (neat)  $\nu$  2961 (w), 2873 (w), 1729 (m), 1458 (w), 1381 (m), 1371 (m), 1338 (w), 1305 (m), 1272 (m), 1137 (s), 1043 (w), 1017 (w), 966 (m), 840 (m), 817 (m), 771 (w), 720 (s), 697 (m), 640 (w), 616 (w), 563 (s)  $\text{cm}^{-1}$ .

TLC  $R_f$  = 0.61 in 8:2 hexanes/EtOAc.

HRMS (ESI)  $m/z$ :  $[\text{M} + \text{NH}_4]^+$  Calcd for  $\text{C}_{12}\text{H}_{22}\text{ClF}_3\text{N}_2\text{O}_4\text{S}\cdot\text{NH}_4$  400.1284; Found 400.1269.

***N*-tert-Butoxycarbonyl-*N'*-chloro-*N'*-ethyl-*N*-pentylsulfamide (S9w)**

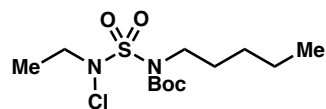

Prepared from sulfamide **S8w** (175 mg, 0.59 mmol) and  $t\text{BuOCl}$  (1.4 mL, 12.4 mmol) following general procedure H. The product was isolated as a colorless oil (180 mg, 92% yield) after purification on a Teledyne Isco CombiFlash $R_f$  system using a Redi Sep  $R_f$  normal phase silica gel column (9:1 hexanes/EtOAc).

$^1\text{H}$  NMR (400 MHz,  $\text{CDCl}_3$ )  $\delta$  3.77–3.73 (m, 2H), 3.69 (q,  $J$  = 7.0 Hz, 2H), 1.75–1.68 (m, 2H), 1.52 (s, 9H), 1.37–1.25 (m, 4H), 1.32 (t,  $J$  = 7.0 Hz, 3H), 0.90 (t,  $J$  = 7.0 Hz, 3H).

$^{13}\text{C}$  NMR (126 MHz,  $\text{CDCl}_3$ )  $\delta$  150.5, 84.4, 53.3, 50.4, 29.3, 28.6, 27.9, 22.2, 13.9, 13.1.

IR (neat)  $\nu$  2934 (w), 2872 (w), 1730 (m), 1457 (w), 1368 (m), 1335 (w), 1280 (m), 1256 (m), 1179 (m), 1136 (s), 1042 (m), 1015 (m), 961 (w), 846 (m), 802 (w), 770 (m), 720 (m), 642 (m), 606 (m), 584 (m), 570 (m), 534 (m)  $\text{cm}^{-1}$ .

TLC  $R_f$  = 0.61 in 8:2 hexanes/EtOAc.

HRMS (ESI)  $m/z$ :  $[\text{M} + \text{Na}]^+$  Calcd for  $\text{C}_{12}\text{H}_{25}\text{ClN}_2\text{O}_4\text{S}\cdot\text{Na}$  351.1121; Found 351.1108.

VII. Preparation and characterization of  $\gamma$ -chlorinated sulfamides.General Procedure I: Chlorine Transfer from *N*-chlorosulfamides.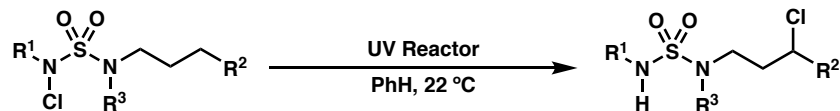

A flame-dried vial equipped with a stir bar was charged with sulfamide (1.0 equiv, 0.2 mmol). The vial was transferred to a nitrogen-filled glovebox where it was charged with anhydrous benzene (PhH, 0.04 M). The vial was sealed with a Teflon lined screw cap and removed from the glovebox. The vial was placed on a stir plate in the center of a Southern New England Ultraviolet Co. RPR-100 Photochemical Reactor barrel and irradiated with 16 ultraviolet lamps until consumption of the starting material as indicated by TLC or  $^1\text{H}$  NMR analysis of a smaller scale reaction set up simultaneously.

Upon consumption of starting material as evidenced by TLC or  $^1\text{H}$  NMR, the solution was concentrated under reduced pressure and the crude material was purified as noted below.

*N*-*tert*-Butoxycarbonyl-*N'*-(4-chloro-hex-1-yl)-*N*-ethylsulfamide (6a)

Prepared from chlorosulfamide **5a** (69 mg, 0.2 mmol) according to general procedure I. After irradiating for 15 minutes, the product was isolated as a white solid (54 mg, 78% yield) following purification by silica gel column chromatography (Gradient: 100% hexanes  $\rightarrow$  20:1 hexanes/EtOAc).

$^1\text{H}$  NMR (400 MHz,  $\text{CDCl}_3$ )  $\delta$  5.27 (t,  $J = 6.4$  Hz, 1H), 3.86–3.80 (m, 1H), 3.72 (q,  $J = 7.0$  Hz, 2H), 2.98 (dt,  $J = 6.4, 6.4$  Hz, 2H), 1.85–1.68 (m, 6H), 1.53 (s, 9H), 1.2 (t,  $J = 7.0$  Hz, 3H), 1.03 (t,  $J = 7.3$  Hz, 3H).

$^{13}\text{C}$  NMR (126 MHz,  $\text{CDCl}_3$ )  $\delta$  151.9, 83.8, 64.7, 43.2, 42.8, 34.8, 31.6, 28.0, 26.0, 15.0, 10.9.

IR (neat)  $\nu$  3315 (br), 2977 (w), 2937 (w), 1704 (m), 1457 (w), 1425 (w), 1368 (m), 1335 (m), 1280 (m), 1257 (m), 1185 (m), 1138 (s), 1085 (m), 1000 (w), 954 (w), 897 (w), 844 (w), 816 (w), 774 (w), 736 (m), 715 (s), 631 (m), 569 (m), 464 (w)  $\text{cm}^{-1}$ .

TLC  $R_f = 0.21$  in 9:1 hexanes:EtOAc.

HRMS (ESI)  $m/z$ :  $[\text{M} + \text{Na}]^+$  Calcd for  $\text{C}_{13}\text{H}_{27}\text{ClN}_2\text{O}_4\text{S}\cdot\text{Na}$  365.1272; Found 365.1271.

*N*-*tert*-Butoxycarbonyl-*N'*-(4-chloro-hex-1-yl)-*N*-(2,2,2-trifluoro)ethylsulfamide (6b)

Prepared from chlorosulfamide **5b** (79 mg, 0.2 mmol) according to general procedure I. After irradiating for 15 minutes, the product was isolated as a white solid (69 mg, 87% yield) following purification by silica gel column chromatography (Gradient: 100% hexanes  $\rightarrow$  20:1 hexanes/EtOAc).

$^1\text{H}$  NMR (400 MHz,  $\text{CDCl}_3$ )  $\delta$  5.33 (t,  $J = 6.2$  Hz, 1H), 4.31 (q,  $J = 8.3$  Hz, 2H), 3.86–3.80 (m, 1H), 3.07 (dt,  $J = 6.3$  Hz, 2H), 1.84–1.68 (m, 6H), 1.53 (s, 9H), 1.03 (t,  $J = 7.3$  Hz, 3H).

$^{13}\text{C}$  NMR (126 MHz,  $\text{CDCl}_3$ )  $\delta$  150.9, 123.4 (q,  $J = 280.5$  Hz), 85.6, 64.7, 47.1 (q,  $J = 35.4$  Hz), 43.3, 34.7, 31.5, 27.8, 26.0, 10.9.

$^{19}\text{F}$  NMR (376 MHz,  $\text{CDCl}_3$ )  $\delta$  -70.85 (t,  $J$  = 8.3 Hz).

IR (neat)  $\nu$  3323 (br), 2979 (w), 1723 (m), 1423 (w), 1397 (w), 1370 (m), 1344 (m), 1298 (w), 1265 (m), 1252 (m), 1142 (s), 1079 (w), 1046 (w), 1028 (w), 965 (w), 897 (w), 849 (w), 830 (w), 795 (w), 775 (w), 736 (s), 704 (s), 643 (m), 577 (m), 530 (w), 463 (w), 421 (w)  $\text{cm}^{-1}$ .

TLC  $R_f$  = 0.21 in 9:1 hexanes:EtOAc.

HRMS (ESI)  $m/z$ :  $[\text{M} + \text{NH}_4]^+$  Calcd for  $\text{C}_{13}\text{H}_{24}\text{ClF}_3\text{N}_2\text{O}_4\text{S}\cdot\text{NH}_4$  414.1436; Found 414.1438.

#### *N*-tert-Butoxycarbonyl-*N'*-tert-butyl-*N*-(3-chloro-2,2-dimethylprop-1-yl)sulfamide (4a)

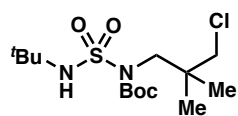

Prepared from chlorosulfamide **1a** (71 mg, 0.2 mmol) according to general procedure I. After irradiating for 15 minutes, the product was isolated as a white solid (67 mg, 94% yield) following purification by silica gel column chromatography (Gradient: 100% hexanes  $\rightarrow$  9:1 hexanes/EtOAc).

$^1\text{H}$  NMR (400 MHz,  $\text{CDCl}_3$ )  $\delta$  5.43 (br s, 1H), 3.73 (s, 2H), 3.44 (s, 2H), 1.54 (s, 9H), 1.28 (s, 9H), 1.08 (s, 6H).

$^{13}\text{C}$  NMR (101 MHz,  $\text{CDCl}_3$ )  $\delta$  152.4, 84.0, 54.9, 54.3, 54.1, 38.0, 29.4, 28.0, 23.6.

IR (neat)  $\nu$  3296 (br m), 2969 (m), 2938 (w), 1705 (s), 1471 (m), 1441 (m), 1394 (m), 1366 (m), 1350 (s), 1293 (m), 1278 (m), 1254 (m), 1164 (s), 1141 (s), 1041 (w), 1005 (m), 912 (m), 894 (w), 864 (w), 844 (m), 791 (m), 773 (m), 757 (m), 707 (s), 605 (s), 576 (s)  $\text{cm}^{-1}$ .

TLC  $R_f$  = 0.24 in 9:1 hexanes:EtOAc.

HRMS (ESI)  $m/z$ :  $[\text{M} - \text{H}]^-$  Calcd for  $\text{C}_{14}\text{H}_{29}\text{ClN}_2\text{O}_4\text{S}$  355.1464; Found 355.1461.

#### *N*-tert-Butoxycarbonyl-*N'*-tert-butyl-*N*-(3-chlorobut-1-yl)sulfamide (4b)

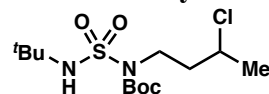

Prepared from chlorosulfamide **1b** (69 mg, 0.2 mmol) according to general procedure I. After irradiating for 15 minutes, the product was isolated as a white solid (64 mg, 93% yield) following purification by silica gel column chromatography (Gradient: 100% hexanes  $\rightarrow$  20:1 hexanes/EtOAc).

$^1\text{H}$  NMR (400 MHz,  $\text{C}_6\text{D}_6$ )  $\delta$  5.37 (br s, 1H), 3.98–3.91 (m, 1H), 3.85–3.79 (m, 1H), 3.76–3.68 (m, 1H), 2.17–2.09 (m, 1H), 2.05–1.96 (m, 1H), 1.32 (s, 9H), 1.14 (d,  $J$  = 6.6 Hz, 3H), 1.04 (s, 9H).

$^1\text{H}$  NMR (400 MHz,  $\text{CDCl}_3$ )  $\delta$  5.32 (br s, 1H), 4.09–4.00 (m, 1H), 3.92–3.85 (m, 1H), 3.82–3.75 (m, 1H), 2.18–2.10 (m, 1H), 2.08–1.98 (m, 1H), 1.55 (d,  $J$  = 6.3 Hz, 3H), 1.54 (s, 9H), 1.31 (s, 9H).

$^{13}\text{C}$  NMR (126 MHz,  $\text{CDCl}_3$ )  $\delta$  152.0, 83.9, 55.7, 55.1, 45.0, 39.8, 29.4, 28.1, 25.4.

IR (neat)  $\nu$  3292 (br), 2978 (w), 2927 (w), 1714 (m), 1474 (w), 1440 (m), 1394 (m), 1365 (m), 1348 (s), 1335 (s), 1301 (m), 1256 (m), 1204 (w), 1163 (s), 1137 (s), 1073 (m), 1043 (m), 993 (m), 956 (m), 872 (m), 850 (m), 810 (m), 767 (m), 714 (s), 684 (m), 601 (s), 576 (s)  $\text{cm}^{-1}$ .

TLC  $R_f$  = 0.22 in 9:1 hexanes:EtOAc.

HRMS (ESI)  $m/z$ :  $[\text{M} - \text{H}]^-$  Calcd for  $\text{C}_{13}\text{H}_{27}\text{ClN}_2\text{O}_4\text{S}$  341.1307; Found 341.1302.

#### *N*-tert-Butoxycarbonyl-*N'*-tert-butyl-*N*-(3-chloro-3-methylbut-1-yl)sulfamide (4c)

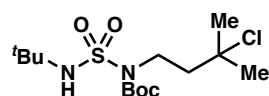

Prepared from chlorosulfamide **1c** (71 mg, 0.2 mmol) according to general procedure I. After irradiating for 1 hour, the product was isolated as a white solid (70 mg, 98% yield) after purification by filtration over a pad of Florisil (EtOAc).

$^1\text{H}$  NMR (400 MHz,  $\text{CDCl}_3$ )  $\delta$  5.32 (br s, 1H), 3.91–3.87 (m, 2H), 2.15–2.11 (m, 2H), 1.61 (s, 6H), 1.54 (s, 9H), 1.32 (s, 9H).

$^{13}\text{C}$  NMR (126 MHz,  $\text{CDCl}_3$ )  $\delta$  152.0, 83.8, 68.2, 55.1, 44.4, 44.2, 32.5, 29.4, 28.1.

IR (neat)  $\nu$  3321 (br), 2970 (w), 1713 (m), 1431 (w), 1394 (w), 1370 (w), 1349 (w), 1297 (m), 1250 (w), 1219 (w), 1161 (m), 1135 (m), 1000 (m), 932 (w), 844 (m), 804 (w), 775 (w), 759 (w), 712 (m), 600 (m), 579 (m)  $\text{cm}^{-1}$ .

HRMS (ESI)  $m/z$ :  $[\text{M} - \text{H}]^-$  Calcd for  $\text{C}_{14}\text{H}_{28}\text{ClN}_2\text{O}_4\text{S}$  355.1458; Found 355.1464.

***N*-tert-Butoxycarbonyl-*N'*-tert-butyl-*N*-(2-(1-chlorocyclopent-1-yl)ethyl)sulfamide (4d)**

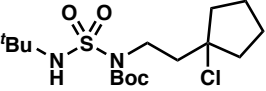 Prepared from chlorosulfamide **1d** (76 mg, 0.2 mmol) according to general procedure I. After irradiating for 2 hours, the product was isolated as a white solid (72 mg, 94% yield) following purification by silica gel column chromatography (9:1 hexanes/EtOAc).

The product was obtained following purification in 94% yield (72 mg) after irradiating for 3 h in  $^i\text{PrOAc}$  (2.0 mL, 0.1 M) in front of two 26W CFL bulbs (1600 lumens).

$^1\text{H}$  NMR (400 MHz,  $\text{CDCl}_3$ )  $\delta$  5.32 (br s, 1H), 3.96–3.92 (m, 2H), 2.24–2.20 (m, 2H), 2.15–2.08 (m, 2H), 1.97–1.91 (m, 2H), 1.79–1.71 (m, 4H), 1.53 (s, 9H), 1.31 (s, 9H).

$^{13}\text{C}$  NMR (126 MHz,  $\text{CDCl}_3$ )  $\delta$  152.1, 83.7, 80.0, 55.1, 44.9, 42.4, 42.3, 29.4, 28.1, 23.0.

IR (neat)  $\nu$  3325 (br w), 2974 (w), 1711 (m), 1426 (w), 1393 (w), 1355 (m), 1290 (w), 1247 (w), 1164 (m), 1142 (m), 1068 (w), 982 (w), 850 (w), 775 (w), 716 (w), 622 (w), 574 (w)  $\text{cm}^{-1}$ .

TLC  $R_f$  = 0.29 in 9:1 hexanes:EtOAc.

HRMS (ESI)  $m/z$ :  $[\text{M} + \text{Na}]^+$  Calcd for  $\text{C}_{16}\text{H}_{31}\text{ClN}_2\text{O}_4\text{S}\cdot\text{Na}$  405.1585; Found 405.1584.

***N*-tert-Butoxycarbonyl-*N'*-tert-butyl-*N*-(2-(1-chlorocyclohex-1-yl)ethyl)sulfamide (4e)**

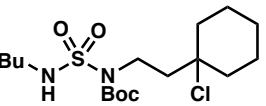 Prepared from chlorosulfamide **1e** (79 mg, 0.2 mmol) according to general procedure I. After irradiating for 15 minutes, the product was isolated as a white solid (75 mg, 95% yield) following purification by silica gel column chromatography (Gradient: 100% hexanes  $\rightarrow$  9:1 hexanes/EtOAc).

$^1\text{H}$  NMR (400 MHz,  $\text{CDCl}_3$ )  $\delta$  5.32 (br s, 1H), 3.94–3.90 (m, 2H), 2.14–2.10 (m, 2H), 1.96–1.91 (m, 2H), 1.73–1.66 (m, 2H), 1.61–1.57 (m, 4H), 1.53 (s, 9H), 1.30 (s, 9H), 1.26–1.20 (m, 2H).

$^{13}\text{C}$  NMR (126 MHz,  $\text{CDCl}_3$ )  $\delta$  152.1, 83.7, 73.4, 55.1, 43.7, 43.4, 39.7, 29.4, 28.1, 25.3, 22.1.

IR (neat)  $\nu$  3221 (br), 2976 (w), 2934 (m), 2864 (w), 1708 (m), 1446 (w), 1425 (w), 1393 (m), 1352 (s), 1300 (m), 1277 (m), 1254 (m), 1229 (m), 1160 (s), 1138 (s), 1040 (w), 977 (m), 849 (m), 798 (w), 774 (m), 713 (s), 612 (m), 589 (m), 569 (m)  $\text{cm}^{-1}$ .

TLC  $R_f$  = 0.45 in 4:1 hexanes:EtOAc.

HRMS (ESI)  $m/z$ :  $[\text{M} + \text{Na}]^+$  Calcd for  $\text{C}_{17}\text{H}_{33}\text{ClN}_2\text{O}_4\text{S}\cdot\text{Na}$  419.1742; Found 419.1742.

***N*-tert-Butoxycarbonyl-*N'*-tert-butyl-*N*-((2*R*)-methyl 4-chloro-4-methylpentano-2-yl)sulfamide (4f)**

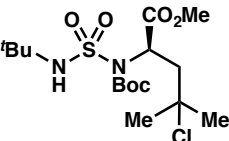 Prepared from chlorosulfamide **1f** (83 mg, 0.2 mmol) according to general procedure I. After irradiating for 1 hour, the product was isolated as a

colorless oil that solidified upon standing (67 mg, 81% yield) after purification on a Teledyne Isco CombiFlashR<sub>f</sub> system using a Redi Sep R<sub>f</sub> normal phase silica gel column (9:1 hexanes/EtOAc).

<sup>1</sup>H NMR (400 MHz, CDCl<sub>3</sub>) δ 5.33 (br s, 1H), 5.09 (t, *J* = 4.4 Hz, 1H), 3.76 (s, 3H), 2.97 (dd, *J* = 15.3, 5.4 Hz, 1H), 2.17 (dd, 15.3, 3.7 Hz, 1H), 1.67 (s, 3H), 1.62 (s, 3H), 1.49 (s, 9H), 1.37 (s, 9H).

<sup>13</sup>C NMR (101 MHz, CDCl<sub>3</sub>) δ 170.7, 151.4, 84.7, 69.1, 56.9, 56.1, 52.6, 47.6, 32.7, 32.6, 29.5, 28.0.

IR (neat) ν 3307 (br), 2977 (w), 2360 (w), 2340 (w), 1750 (m), 1718 (m), 1652 (w), 1558 (w), 1540 (w), 1506 (w), 1473 (w), 1456 (w), 1436 (w), 1395 (w), 1370 (m), 1352 (m), 1314 (w), 1249 (w), 1147 (m), 1115 (w), 998 (w), 844 (w), 774 (w), 711 (w), 667 (w), 614 (w), 576 (w) cm<sup>-1</sup>.

TLC R<sub>f</sub> = 0.30 in 8:2 hexanes:EtOAc.

HRMS (ESI) *m/z*: [M + Na]<sup>+</sup> Calcd for C<sub>16</sub>H<sub>31</sub>ClN<sub>2</sub>O<sub>6</sub>S•Na 437.1489; Found 437.1492.

***N*-tert-Butoxycarbonyl-*N'*-tert-butyl-*N*-((*S*)-2-(1,3-dioxoisindolin-2-yl)-3-chloro-3-methylbutyl)sulfamide (4g)**

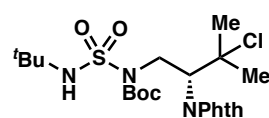

Prepared from chlorosulfamide **1g** (100 mg, 0.2 mmol) according to general procedure I. After irradiating for 15 minutes, the product was isolated a white solid (85 mg, 85% yield) following purification by silica gel column chromatography (Gradient: 100% hexanes → 9:1

hexanes/EtOAc).

<sup>1</sup>H NMR (400 MHz, CDCl<sub>3</sub>) δ 7.88–7.83 (m, 2H), 7.71–7.69 (m, 2H), 5.26 (br s, 1H), 4.92 (dd, *J* = 2.2, 10.8 Hz, 1H), 4.78 (dd, *J* = 10.8, 14.5 Hz, 1H), 4.19 (dd, *J* = 2.2, 14.5 Hz, 1H), 1.85 (s, 3H), 1.67 (s, 3H), 1.56 (s, 9H), 1.23 (s, 9H).

<sup>13</sup>C NMR (126 MHz, CDCl<sub>3</sub>) δ 168.5, 168.2, 151.7, 134.1, 133.8, 132.0, 131.4, 123.5, 123.3, 84.7, 69.8, 59.1, 55.1, 44.3, 31.3, 30.4, 29.3, 28.1.

IR (neat) ν 3308 (br), 2977 (w), 2935 (w), 1780 (w), 1717 (s), 1468 (w), 1428 (w), 1393 (m), 1356 (m), 1334 (m), 1249 (w), 1164 (m), 1140 (m), 1074 (w), 1042 (w), 991 (w), 957 (w), 876 (w), 848 (w), 794 (w), 774 (w), 721 (m), 710 (m), 604 (w), 577 (w), 531 (w) cm<sup>-1</sup>.

TLC R<sub>f</sub> = 0.16 in 4:1 hexanes:EtOAc.

HRMS (ESI) *m/z*: [M + Na]<sup>+</sup> Calcd for C<sub>22</sub>H<sub>32</sub>ClN<sub>3</sub>O<sub>6</sub>S•Na 524.1593; Found 524.1591.

***N*-tert-Butoxycarbonyl-*N'*-tert-butyl-*N*-(3-chloro-3,7-dimethyloct-1-yl)sulfamide (4h)**

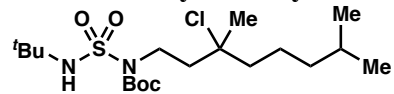

Prepared from chlorosulfamide **1h** (85 mg, 0.2 mmol) according to general procedure I. After irradiating for 15 minutes, the product was isolated as a colorless oil (79 mg, 92% yield) after

purification on a Teledyne Isco CombiFlashR<sub>f</sub> system using a Redi Sep R<sub>f</sub> normal phase silica gel column (9:1 hexanes/EtOAc).

The product was obtained following purification in 95% yield (81 mg) after irradiating for 2 h in <sup>1</sup>PrOAc (2.0 mL, 0.1 M) in front of two 26W CFL bulbs (1600 lumens).



$^1\text{H}$  NMR (400 MHz,  $\text{CDCl}_3$ )  $\delta$  5.32 (br s, 1H), 3.90–3.86 (m, 2H), 2.20–2.13 (m, 1H), 2.10–2.03 (m, 1H), 1.76–1.68 (m, 2H), 1.55 (s, 3H), 1.54 (s, 9H), 1.48–1.42 (m, 2H), 1.31 (s, 9H), 1.21–1.15 (m, 3H), 0.88 (d,  $J = 6.6$  Hz, 6H).

$^{13}\text{C}$  NMR (126 MHz,  $\text{CDCl}_3$ )  $\delta$  152.0, 83.7, 72.2, 55.1, 44.6, 44.0, 42.6, 38.9, 29.6, 29.4, 28.1, 27.7, 22.5, 22.5, 22.2.

IR (neat)  $\nu$  3340 (br), 2953 (w), 1709 (m), 1425 (w), 1392 (w), 1351 (m), 1294 (m), 1245 (w), 1139 (s), 986 (w), 912 (w), 848 (w), 802 (w), 773 (w), 713 (m), 606 (m), 576 (m)  $\text{cm}^{-1}$ .

TLC  $R_f = 0.49$  in 8:2 hexanes/EtOAc.

HRMS (ESI)  $m/z$ :  $[\text{M} - \text{H}]^-$  Calcd for  $\text{C}_{19}\text{H}_{38}\text{ClN}_2\text{O}_4\text{S}$  425.2240; Found 425.2245.

#### *N*-tert-Butoxycarbonyl-*N'*-tert-butyl-*N*-(3-chloropent-1-yl)sulfamide (**4i**)

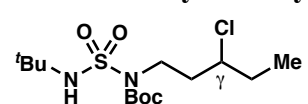 Prepared from chlorosulfamide **1i** (71 mg, 0.2 mmol) according to general procedure I. After irradiating for 15 minutes, the product was isolated as a colorless oil (53 mg, 75% yield) after purification on a Teledyne Isco CombiFlash $R_f$  system using a Redi Sep  $R_f$  normal phase silica gel column (Gradient: 100% hexanes  $\rightarrow$  8:2 hexanes/Et $_2$ O).

In order to determine the ratio of  $\gamma$ -chlorinated: $\delta$ -chlorinated isomers, duplicate reactions of chlorosulfamide **1i** (11 mg, 0.03 mmol) were subjected to general procedure I. After irradiating for 15 minutes, each sample was concentrated under reduced pressure and 1,2,4,5-tetrachloro-3-nitrobenzene (1.0 equiv) was added as an internal standard.  $^1\text{H}$  NMR analysis of the crude reaction mixtures revealed a 8.8:1.0 mixture of  $\gamma$ -chlorinated: $\delta$ -chlorinated isomers as an average of 2 runs.

Sample 1: 88% yield  $\gamma$ -chlorinated **4i**, 8% yield  $\delta$ -chlorinated **7i**, 7% yield protodehalogenated **S8i**.

Sample 2: 85% yield  $\gamma$ -chlorinated **4i**, 9% yield  $\delta$ -chlorinated **7i**, 5% yield protodehalogenated **S8i**.

$^1\text{H}$  NMR (400 MHz,  $\text{CDCl}_3$ )  $\delta$  5.32 (br s, 1H), 3.95–3.75 (m, 3H), 2.20–2.12 (m, 1H), 2.08–1.98 (m, 1H), 1.85–1.69 (m, 2H), 1.54 (s, 9H), 1.30 (s, 9H), 1.03 (t,  $J = 7.3$  Hz, 3H).

$^{13}\text{C}$  NMR (126 MHz,  $\text{CDCl}_3$ )  $\delta$  152.1, 83.9, 62.4, 55.1, 45.1, 37.7, 31.6, 29.4, 28.1, 10.8.

IR (neat)  $\nu$  3318 (br), 2973 (w), 1707 (m), 1392 (m), 1351 (m), 1286 (m), 1252 (m), 1138 (s), 986 (m), 911 (w), 847 (m), 793 (w), 773 (w), 712 (s), 603 (m), 577 (m)  $\text{cm}^{-1}$ .

TLC  $R_f = 0.54$  in 8:2 hexanes/EtOAc.

HRMS (ESI)  $m/z$ :  $[\text{M} + \text{Na}]^+$  Calcd for  $\text{C}_{14}\text{H}_{29}\text{ClN}_2\text{O}_4\text{S}\cdot\text{Na}$  379.1434; Found 379.1428.

#### *N*-tert-Butoxycarbonyl-*N'*-tert-butyl-*N*-(3-chlorohex-1-yl)sulfamide (**4j**)

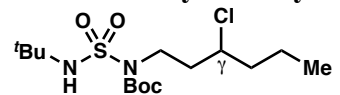 Prepared from chlorosulfamide **1j** (74 mg, 0.2 mmol) according to general procedure I. After irradiating for 15 minutes, the product was isolated as a white solid (62 mg, 84% yield) following purification by silica gel column chromatography (Gradient: 100% hexanes  $\rightarrow$  20:1 hexanes/EtOAc).

In order to determine the ratio of  $\gamma$ -chlorinated: $\delta$ -chlorinated isomers, duplicate reactions of chlorosulfamide **1j** (11 mg, 0.03 mmol) were subjected to general procedure I. After irradiating for 15 minutes, each sample was concentrated under reduced pressure and 1,2,4,5-tetrachloro-3-nitrobenzene (1.0 equiv) was added as an internal standard.  $^1\text{H}$  NMR analysis of the crude

reaction mixtures revealed a 14.0:1.0 mixture of  $\gamma$ -chlorinated: $\delta$ -chlorinated isomers as an average of 2 runs.

Sample 1: 84% yield  $\gamma$ -chlorinated **4j**, 6% yield  $\delta$ -chlorinated **7j**, 9% yield protodehalogenated **S8j**.

Sample 2: 84% yield  $\gamma$ -chlorinated **4j**, 6% yield  $\delta$ -chlorinated **7j**, 8% yield protodehalogenated **S8j**.

$^1\text{H}$  NMR (400 MHz,  $\text{CDCl}_3$ )  $\delta$  5.32 (br s, 1H), 3.95–3.88 (m, 2H), 3.83–3.75 (m, 1H), 2.20–2.12 (m, 1H), 2.07–1.98 (m, 1H), 1.75–1.69 (m, 2H), 1.54 (s, 9H), 1.49–1.40 (m, 2H), 1.30 (s, 9H), 0.92 (t,  $J = 7.3$  Hz, 3H).

$^{13}\text{C}$  NMR (101 MHz,  $\text{CDCl}_3$ )  $\delta$  152.0, 83.8, 60.6, 55.1, 45.0, 40.5, 38.0, 29.4, 28.1, 19.5, 13.4.

IR (neat)  $\nu$  3316 (br w), 2969 (w), 2874 (w), 1708 (m), 1426 (w), 1393 (m), 1352 (s), 1291 (m), 1256 (m), 1139 (s), 1042 (w), 986 (m), 848 (m), 810 (w), 772 (m), 713 (s), 604 (m), 578 (s)  $\text{cm}^{-1}$ .

TLC  $R_f = 0.22$  in 9:1 hexanes:EtOAc.

HRMS (ESI)  $m/z$ :  $[\text{M} - \text{H}]^-$  Calcd for  $\text{C}_{15}\text{H}_{31}\text{ClN}_2\text{O}_4\text{S}$  369.1620; Found 369.1617.

#### *N*-*tert*-Butyloxycarbonyl-*N'*-*tert*-butyl-*N*-(methyl 4-chlorohexano-6-yl)sulfamide (**4k**)

Prepared from chlorosulfamide **1k** (83 mg, 0.2 mmol) according to general procedure I. After irradiating for 15 minutes, the product was isolated as a colorless oil (69 mg, 83% yield) following purification by silica gel column chromatography (Gradient: 100% hexanes  $\rightarrow$  9:1 hexanes/EtOAc).

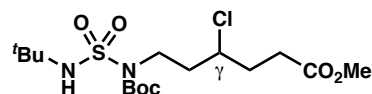

$^1\text{H}$  NMR (400 MHz,  $\text{CDCl}_3$ )  $\delta$  5.31 (br s, 1H), 3.99–3.87 (m, 2H), 3.83–3.76 (m, 1H), 3.68 (s, 3H), 2.61–2.49 (m, 2H), 2.21–1.95 (m, 4H), 1.53 (s, 9H), 1.30 (s, 9H).

$^{13}\text{C}$  NMR (126 MHz,  $\text{CDCl}_3$ )  $\delta$  173.1, 152.0, 84.0, 59.7, 55.2, 51.7, 44.8, 38.1, 33.4, 30.8, 29.4, 28.1.

IR (neat)  $\nu$  3315 (br), 2976 (w), 1711 (m), 1436 (w), 1393 (w), 1352 (m), 1290 (m), 1255 (m), 1139 (s), 989 (m), 916 (w), 848 (m), 792 (w), 773 (w), 712 (m), 604 (m), 576 (m)  $\text{cm}^{-1}$ .

TLC  $R_f = 0.29$  in 4:1 hexanes:EtOAc.

HRMS (ESI)  $m/z$ :  $[\text{M} + \text{NH}_4]^+$  Calcd for  $\text{C}_{16}\text{H}_{31}\text{ClN}_2\text{O}_6\text{S} \cdot \text{NH}_4$  432.1930; Found 432.1930.

#### *N*-Acetyl-*N'*-*tert*-butyl-*N*-(3-chlorohex-1-yl)sulfamide (**4l**)

Prepared from chlorosulfamide **1l** (63 mg, 0.2 mmol) according to general procedure I. After irradiating for 15 minutes, the product was isolated as a colorless oil (55 mg, 87% yield) following purification by silica gel column chromatography (Gradient: 100% hexanes  $\rightarrow$  20:1 hexanes/EtOAc).

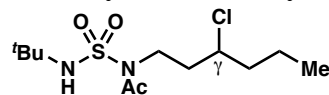

In order to determine the ratio of  $\gamma$ -chlorinated: $\delta$ -chlorinated isomers, duplicate reactions of chlorosulfamide **1l** (9 mg, 0.03 mmol) were subjected to general procedure I. After irradiating for 15 minutes, each sample was concentrated under reduced pressure and 1,2,4,5-tetrachloro-3-nitrobenzene (1.0 equiv) was added as an internal standard.  $^1\text{H}$  NMR analysis of the crude reaction mixtures revealed a 22.5:1.0 mixture of  $\gamma$ -chlorinated: $\delta$ -chlorinated isomers as an average of 2 runs.

Sample 1: 89% yield  $\gamma$ -chlorinated **4l**, 4% yield  $\delta$ -chlorinated **7l**.

Sample 2: 93% yield  $\gamma$ -chlorinated **4l**, 4% yield  $\delta$ -chlorinated **7l**.

$^1\text{H}$  NMR (400 MHz,  $\text{CDCl}_3$ )  $\delta$  5.42 (br s, 1H), 3.99–3.92 (m, 2H), 3.90–3.82 (m, 1H), 2.33 (s, 3H), 2.30–2.23 (m, 1H), 2.06–1.97 (m, 1H), 1.77–1.71 (m, 2H), 1.55–1.42 (m, 2H), 1.31 (s, 9H), 0.98 (t,  $J = 7.4$  Hz, 3H).

$^{13}\text{C}$  NMR (126 MHz,  $\text{CDCl}_3$ )  $\delta$  171.1, 60.7, 55.5, 45.5, 40.5, 38.2, 29.5, 23.9, 19.5, 13.4.

IR (neat)  $\nu$  3290 (br), 2962 (w), 2874 (w), 1673 (m), 1426 (m), 1394 (m), 1348 (s), 1265 (m), 1232 (m), 1154 (s), 1098 (w), 1039 (w), 1001 (m), 927 (m), 853 (m), 771 (m), 736 (s), 702 (m), 663 (m), 605 (s), 546 (s)  $\text{cm}^{-1}$ .

TLC  $R_f = 0.22$  in 4:1 hexanes:EtOAc.

HRMS (ESI)  $m/z$ :  $[\text{M} - \text{H}]^-$  Calcd for  $\text{C}_{12}\text{H}_{25}\text{ClN}_2\text{O}_3\text{S}$  311.1202; Found 311.1195.

#### *N*-*tert*-Butyl-*N'*-(3-chlorohex-1-yl)-*N'*-(2,2,2-trifluoroethyl)sulfamide (**4m**)

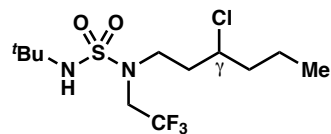

Prepared from chlorosulfamide **1m** (71 mg, 0.2 mmol) according to general procedure I. After irradiating for 15 minutes, the product was isolated as a colorless oil (69 mg, 97% yield) following purification by silica gel column chromatography (Gradient: 100% hexanes  $\rightarrow$  20:1 hexanes/EtOAc).

$^1\text{H}$  NMR (400 MHz,  $\text{CDCl}_3$ )  $\delta$  4.00 (br s, 1H), 3.94–3.88 (m, 1H), 3.81 (qd,  $J = 8.8, 2.7$  Hz, 2H), 3.59–3.42 (m, 2H), 2.21–2.14 (m, 1H), 2.04–1.95 (m, 1H), 1.74–1.69 (m, 2H), 1.59–1.42 (m, 2H), 1.35 (s, 9H), 0.93 (t,  $J = 7.4$  Hz, 3H).

$^{13}\text{C}$  NMR (126 MHz,  $\text{CDCl}_3$ )  $\delta$  124.4 (q,  $J = 281.1$  Hz), 60.7, 55.1, 49.0 (q,  $J = 34.2$  Hz), 47.4, 36.1, 29.6, 19.5, 13.4.

$^{19}\text{F}$  NMR (376 MHz,  $\text{CDCl}_3$ )  $\delta$  -69.71 (t,  $J = 8.9$  Hz).

IR (neat)  $\nu$  3288 (br), 2963 (w), 2876 (w), 1465 (w), 1429 (w), 1393 (w), 1369 (w), 1317 (m), 1272 (m), 1231 (w), 1140 (s), 1081 (m), 1042 (m), 981 (m), 929 (w), 908 (w), 870 (m), 832 (w), 740 (m), 665 (m), 604 (m), 566 (m)  $\text{cm}^{-1}$ .

TLC  $R_f = 0.20$  in 9:1 hexanes:EtOAc.

HRMS (ESI)  $m/z$ :  $[\text{M} - \text{H}]^-$  Calcd for  $\text{C}_{12}\text{H}_{24}\text{ClF}_3\text{N}_2\text{O}_2\text{S}$  351.1126; Found 351.1118.

#### *N'*-*tert*-Butyl-*N*-(3-chloropent-1-yl)-*N*-trifluoroacetylsulfamide (**4n**)

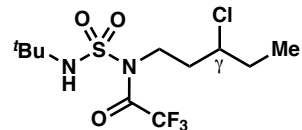

Prepared from chlorosulfamide **1n** (71 mg, 0.2 mmol) according to general procedure I at 0.013 M. After irradiating for 15 minutes, the product was isolated as a colorless oil (45 mg, 63% yield) after purification on a Teledyne Isco CombiFlash $R_f$  system using a Redi Sep  $R_f$  normal phase silica gel column (95:5 hexanes/EtOAc).

$^1\text{H}$  NMR (400 MHz,  $\text{CDCl}_3$ )  $\delta$  5.57 (br s, 1H), 4.15 (ddd,  $J = 15.9, 11.1, 5.3$  Hz, 1H), 3.91–3.82 (m, 2H), 2.29–2.11 (m, 2H), 1.86–1.73 (m, 2H), 1.32 (s, 9H), 1.05 (t,  $J = 7.3$  Hz, 3H).

$^{13}\text{C}$  NMR (126 MHz,  $\text{CDCl}_3$ )  $\delta$  156.2 (q,  $J = 38.6$  Hz), 115.0 (q,  $J = 274.6$  Hz), 61.6, 56.1, 45.4, 37.7, 31.3, 29.1, 10.5.

$^{19}\text{F}$  NMR (376 MHz,  $\text{CDCl}_3$ )  $\delta$  -70.75.

IR (neat)  $\nu$  3311 (br), 2975 (w), 1705 (m), 1431 (w), 1396 (m), 1364 (m), 1320 (w), 1227 (m), 1210 (m), 1167 (s), 1081 (m), 1059 (m), 997 (m), 862 (w), 791 (w), 758 (m), 691 (m), 612 (s), 580 (m), 529 (m)  $\text{cm}^{-1}$ .

TLC  $R_f = 0.49$  in 8:2 hexanes/EtOAc.

HRMS (ESI)  $m/z$ :  $[M - H]^-$  Calcd for  $C_{11}H_{19}ClF_3N_2O_3S$  351.0757; Found 351.0765.

***N*-tert-Butoxycarbonyl-*N*-(3-chlorohex-1-yl)-*N'*-(2,2,2-trifluoroethyl)sulfamide (4o)**

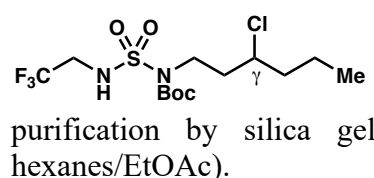 Prepared from chlorosulfamide **1o** (74 mg, 0.19 mmol) according to general procedure I. After irradiating for 15 minutes, the product was isolated as a colorless oil (58 mg, 79% yield) following purification by silica gel column chromatography (Gradient: 100% hexanes → 20:1 hexanes/EtOAc).

In order to determine the ratio of  $\gamma$ -chlorinated: $\delta$ -chlorinated isomers, duplicate reactions of chlorosulfamide **1o** (12 mg, 0.03 mmol) were subjected to general procedure I. After irradiating for 15 minutes, each sample was concentrated under reduced pressure and 1,2,4,5-tetrachloro-3-nitrobenzene (1.0 equiv) was added as an internal standard.  $^1H$  NMR analysis of the crude reaction mixtures revealed a 10.5:1.0 mixture of  $\gamma$ -chlorinated: $\delta$ -chlorinated isomers as an average of 2 runs.

Sample 1: 77% yield  $\gamma$ -chlorinated **4o**, 7% yield  $\delta$ -chlorinated **7o**, 14% protodehalogenated **S8o**.

Sample 2: 79% yield  $\gamma$ -chlorinated **4o**, 8% yield  $\delta$ -chlorinated **7o**, 20% protodehalogenated **S8o**.

$^1H$  NMR (400 MHz,  $CDCl_3$ )  $\delta$  5.82 (t,  $J = 6.9$  Hz, 1H), 3.93–3.86 (m, 2H), 3.80–3.74 (m, 1H), 3.70–3.64 (m, 2H), 2.14–2.05 (m, 1H), 2.05–1.94 (m, 1H), 1.74–1.67 (m, 2H), 1.52 (s, 9H), 1.47–1.39 (m, 2H), 0.91 (t,  $J = 7.3$  Hz, 3H).

$^{13}C$  NMR (126 MHz,  $CDCl_3$ )  $\delta$  151.6, 123.4 (q,  $J = 278.3$  Hz), 84.9, 60.2, 45.7, 45.2 (q,  $J = 36.0$  Hz), 40.5, 38.1, 27.9, 19.5, 13.4.

$^{19}F$  NMR (376 MHz,  $CDCl_3$ )  $\delta$  -71.93 (t,  $J = 9.0$  Hz).

IR (neat)  $\nu$  3309 (br), 2964 (w), 1712 (m), 1456 (w), 1371 (m), 1265 (m), 1144 (s), 963 (w), 832 (w), 734 (s), 704 (s), 664 (m), 583 (m), 550 (m)  $cm^{-1}$ .

TLC  $R_f = 0.21$  in 9:1 hexanes/EtOAc.

HRMS (ESI)  $m/z$ :  $[M - H]^-$  Calcd for  $C_{13}H_{24}ClF_3N_2O_4S$  395.1025; Found 395.1015.

***N*-tert-Butyl-*N'*-(3-chloro-4-methylpentyl)-*N'*-(2,2,2-trifluoroethyl)sulfamide (4p)**

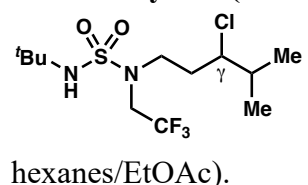 Prepared from chlorosulfamide **1p** (71 mg, 0.2 mmol) according to general procedure I. After irradiating for 15 minutes, the product was isolated as a colorless oil (50 mg, 70% yield) following purification by silica gel column chromatography (Gradient: 100% hexanes → 50:1 hexanes/EtOAc).

In order to determine the ratio of  $\gamma$ -chlorinated: $\delta$ -chlorinated isomers, duplicate reactions of chlorosulfamide **1p** (11 mg, 0.03 mmol) were subjected to general procedure I. After irradiating for 15 minutes, each sample was concentrated under reduced pressure and 2-bromo-5-(trifluoromethyl)pyridine (1.0 equiv) was added as an internal standard.  $^{19}F$  NMR analysis of the crude reaction mixtures revealed a 13:1.0 mixture of  $\gamma$ -chlorinated: $\delta$ -chlorinated isomers as an average of 2 runs.

Sample 1: 64% yield  $\gamma$ -chlorinated **4p**, 6% yield  $\delta$ -chlorinated **7p**, 7% yield of  $\beta$ -chlorinated **S11p**, and 14% yield of protodehalogenated **S8p**.

Sample 2: 66% yield  $\gamma$ -chlorinated **4p**, 5% yield  $\delta$ -chlorinated **7p**, 7% yield of  $\beta$ -chlorinated **S11p**, and 10% yield of protodehalogenated **S8p**.

$^1\text{H}$  NMR (400 MHz,  $\text{CDCl}_3$ )  $\delta$  4.11 (br s, 1H), 3.84–3.78 (m, 3H), 3.56 (ddd,  $J = 14.8, 9.9, 4.9$  Hz, 1H), 3.44 (ddd,  $J = 15.4, 9.9, 6.1$  Hz, 1H), 2.17–2.09 (m, 1H), 2.04–1.91 (m, 2H), 1.34 (s, 9H), 1.02 (d,  $J = 6.7$  Hz, 3H), 0.99 (d,  $J = 6.7$  Hz, 3H).

$^{13}\text{C}$  NMR (126 MHz,  $\text{CDCl}_3$ )  $\delta$  124.4 (q,  $J = 280.7$  Hz), 67.2, 55.1, 49.0 (q,  $J = 33.8$  Hz), 34.6, 33.6, 29.7, 19.7, 17.4.

$^{19}\text{F}$  NMR (376 MHz,  $\text{CDCl}_3$ )  $\delta$  -69.70 (t,  $J = 9.0$  Hz).

IR (neat)  $\nu$  3289 (br), 2969 (w), 1464 (w), 1426 (w), 1392 (m), 1369 (w), 1323 (m), 1272 (m), 1229 (w), 1141 (s), 1084 (m), 1043 (m), 981 (m), 928 (w), 906 (w), 870 (w), 823 (w), 738 (s), 704 (w), 664 (m), 604 (m), 561 (m)  $\text{cm}^{-1}$ .

TLC  $R_f = 0.32$  in 4:1 hexanes:EtOAc.

HRMS (ESI)  $m/z$ :  $[\text{M} - \text{H}]^-$  Calcd for  $\text{C}_{12}\text{H}_{24}\text{ClF}_3\text{N}_2\text{O}_2\text{S}$  351.1126; Found 351.1118.

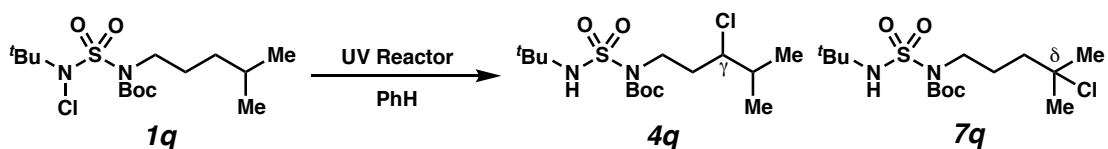

Chlorosulfamide **1q** (74 mg, 0.2 mmol) was subjected to general procedure I. After irradiating for 15 minutes, products **4q** and **5q** (73 mg, 98% yield) were isolated as a mixture following purification by silica gel column chromatography (Gradient: 100% hexanes  $\rightarrow$  9:1 hexanes/EtOAc).

In order to determine the ratio of **4q**:**7q**, duplicate reactions of chlorosulfamide **1q** (11 mg, 0.03 mmol) were subjected to general procedure I. After irradiating for 1 hour, each sample was concentrated under reduced pressure and 1,2,4,5-tetrachloro-3-nitrobenzene (1.0 equiv) was added as an internal standard.  $^1\text{H}$  NMR analysis of the crude reaction mixtures revealed a 2.0:1.0 mixture of **4q**:**7q** as an average of 2 runs.

Sample 1: 68% yield **4q**, 35% yield **7q**.

Sample 2: 69% yield **4q**, 35% yield **7q**.

#### *N*-tert-Butoxycarbonyl-*N'*-tert-butyl-*N*-(3-chloro-4-methylpentyl)sulfamide (**4q**)

Isolated for characterization by silica gel column chromatography (Gradient: 100% hexanes  $\rightarrow$  20:1 hexanes/EtOAc) from a mixture of chlorinated isomers (**4q** and **7q**).

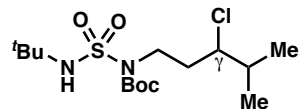

$^1\text{H}$  NMR (400 MHz,  $\text{CDCl}_3$ )  $\delta$  5.33 (br s, 1H), 3.93 (ddd,  $J = 14.6, 9.2, 5.0$  Hz, 1H), 3.86–3.73 (m, 2H), 2.15–2.00 (m, 2H), 1.99–1.91 (m, 1H), 1.54 (s, 9H), 1.30 (s, 9H), 1.02 (d,  $J = 6.7$  Hz, 3H), 0.98 (d,  $J = 6.7$  Hz, 3H).

$^{13}\text{C}$  NMR (126 MHz,  $\text{CDCl}_3$ )  $\delta$  152.1, 83.9, 67.2, 55.1, 45.5, 35.6, 34.5, 29.4, 28.1, 19.7, 17.4.

IR (neat)  $\nu$  3313 (br), 2971 (w), 1708 (m), 1426 (w), 1393 (m), 1352 (s), 1292 (m), 1250 (m), 1138 (s), 1042 (w), 986 (m), 848 (m), 772 (m), 713 (s), 631 (m), 604 (m), 578 (m)  $\text{cm}^{-1}$ .

TLC  $R_f = 0.47$  in 4:1 hexanes:EtOAc.

HRMS (ESI)  $m/z$ :  $[\text{M} - \text{H}]^-$  Calcd for  $\text{C}_{15}\text{H}_{31}\text{ClN}_2\text{O}_4\text{S}$  369.1620; Found 369.1614.

***N*-tert-Butoxycarbonyl-*N'*-tert-butyl-*N*-(4-chloro-4-methylpentyl)sulfamide (7q)**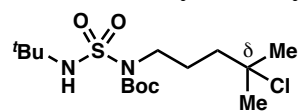

Isolated for characterization by silica gel column chromatography (Gradient: 100% hexanes  $\rightarrow$  50:1 hexanes/EtOAc) from a mixture of chlorinated isomers (**4q** and **7q**).

$^1\text{H}$  NMR (400 MHz,  $\text{CDCl}_3$ )  $\delta$  5.32 (br s, 1H), 3.68 (t,  $J = 7.3$  Hz, 2H), 1.94–1.86 (m, 2H), 1.78–1.74 (m, 2H), 1.57 (s, 6H), 1.54 (s, 9H), 1.30 (s, 9H).

$^{13}\text{C}$  NMR (126 MHz,  $\text{CDCl}_3$ )  $\delta$  152.2, 83.6, 70.3, 55.1, 47.3, 42.7, 32.4, 29.4, 28.1, 25.4.

IR (neat)  $\nu$  3318 (br), 2974 (w), 2932 (w), 1707 (m), 1457 (w), 1425 (w), 1393 (m), 1368 (m), 1353 (s), 1292 (m), 1257 (m), 1138 (s), 1040 (w), 984 (m), 847 (m), 790 (w), 774 (m), 713 (s), 580 (s)  $\text{cm}^{-1}$ .

TLC  $R_f = 0.43$  in 4:1 hexanes:EtOAc.

HRMS (ESI)  $m/z$ :  $[\text{M} - \text{H}]^-$  Calcd for  $\text{C}_{15}\text{H}_{31}\text{ClN}_2\text{O}_4\text{S}$  369.1520; Found 369.1615.

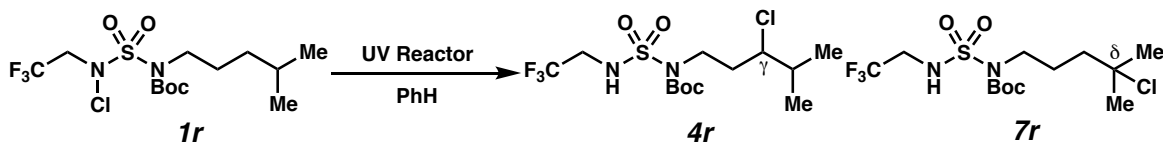

Chlorosulfamide **1r** (79 mg, 0.2 mmol) was subjected to general procedure I. After irradiating for 1 hour, products **4r** and **7r** (66 mg, 84% yield) were isolated as a mixture following purification by silica gel column chromatography (Gradient: 100% hexanes  $\rightarrow$  50:1 hexanes/acetone).

In order to determine the ratio of **4r**:**7r**, duplicate reactions of chlorosulfamide **1r** (12 mg, 0.03 mmol) were subjected to general procedure I. After irradiating for 1 hour, each sample was concentrated under reduced pressure and 1,2,4,5-tetrachloro-3-nitrobenzene (1.0 equiv) was added as an internal standard.  $^1\text{H}$  NMR analysis of the crude reaction mixtures revealed a 1.0:1.9 mixture of **4r**:**7r** and 13% protodehalogenated material as an average of two runs.

Sample 1: 30% yield **4r**, 57% yield **7r**, 13% yield protodehalogenated **S8r**.

Sample 2: 30% yield **4r**, 56% yield **7r**, 13% yield protodehalogenated **S8r**.

***N*-tert-Butoxycarbonyl-*N*-(3-chloro-4-methylpentyl)-*N'*-(2,2,2-trifluoroethyl)sulfamide (4r)**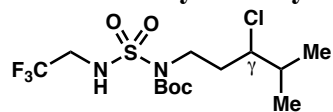

Isolated for characterization by silica gel column chromatography (Gradient: 100% hexanes  $\rightarrow$  50:1 hexanes/EtOAc) from a mixture of chlorinated isomers (**4r** and **7r**) that had already been purified by the

column conditions used to isolate the mixture (Gradient: 100% hexanes  $\rightarrow$  50:1 hexanes/acetone).

$^1\text{H}$  NMR (400 MHz,  $\text{CDCl}_3$ )  $\delta$  5.86 (t,  $J = 6.9$  Hz, 1H), 3.93 (ddd,  $J = 14.5, 9.4, 5.1$  Hz, 1H), 3.81–3.66 (m, 4H), 2.11–1.99 (m, 2H), 1.98–1.91 (m, 1H), 1.54 (s, 9H), 1.02 (d,  $J = 6.7$  Hz, 3H), 0.99 (d,  $J = 6.7$  Hz, 3H).

$^{13}\text{C}$  NMR (126 MHz,  $\text{CDCl}_3$ )  $\delta$  151.7, 123.4 (q,  $J = 278.1$  Hz), 85.0, 66.8, 46.2, 45.3 (q,  $J = 35.6$  Hz), 35.6, 34.5, 27.9, 19.7, 17.4.

$^{19}\text{F}$  NMR (376 MHz,  $\text{CDCl}_3$ )  $\delta$  -71.93 (t,  $J = 8.8$  Hz).

IR (neat)  $\nu$  3302 (br), 2971 (w), 1706 (m), 1456 (w), 1369 (m), 1342 (m), 1292 (m), 1276 (m), 1140 (s), 962 (m), 831 (m), 772 (m), 718 (s), 664 (m), 625 (m), 582 (m), 549 (m)  $\text{cm}^{-1}$ .

TLC  $R_f$  = 0.41 in 4:1 hexanes:EtOAc.

HRMS (ESI)  $m/z$ :  $[M - H]^-$  Calcd for  $C_{13}H_{24}ClF_3N_2O_4S$  395.1025; Found 395.1015.

***N*-tert-Butoxycarbonyl-*N*-(4-chloro-4-methylpentyl)-*N'*-(2,2,2-trifluoroethyl)sulfamide (7r)**

Isolated for characterization by silica gel column chromatography (Gradient: 100% hexanes  $\rightarrow$  50:1 hexanes/EtOAc) from a mixture of chlorinated isomers (**4r** and **7r**) that had already been purified by the column conditions used to isolate the mixture (Gradient: 100% hexanes  $\rightarrow$  50:1 hexanes/acetone).

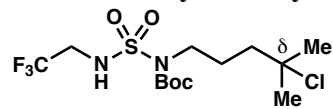

$^1H$  NMR (400 MHz,  $CDCl_3$ )  $\delta$  5.84 (t,  $J$  = 7.0 Hz, 1H), 3.73–3.65 (m, 4H), 1.91–1.83 (m, 2H), 1.76–1.72 (m, 2H), 1.58 (s, 6H), 1.53 (s, 9H).

$^{13}C$  NMR (101 MHz,  $CDCl_3$ )  $\delta$  151.7, 123.4 (q,  $J$  = 278.8 Hz), 84.7, 70.1, 47.9, 45.2 (q,  $J$  = 35.4 Hz), 42.5, 32.4, 27.9, 25.5.

$^{19}F$  NMR (376 MHz,  $CDCl_3$ )  $\delta$  -71.93 (t,  $J$  = 8.9 Hz).

IR (neat)  $\nu$  3300 (br), 2978 (w), 1707 (m), 1457 (w), 1369 (m), 1340 (m), 1291 (m), 1276 (m), 1141 (s), 1008 (w), 963 (w), 832 (m), 793 (w), 774 (w), 719 (s), 664 (m), 630 (m), 584 (m), 549 (m)  $cm^{-1}$ .

TLC  $R_f$  = 0.38 in 4:1 hexanes:EtOAc.

HRMS (ESI)  $m/z$ :  $[M - H]^-$  Calcd for  $C_{13}H_{24}ClF_3N_2O_4S$  395.1025; Found 395.1014.

***N*-tert-Butoxycarbonyl-*N'*-tert-butyl-*N*-(tert-butyl 2-chlorobutano-4-yl)sulfamide (S10t)**

Prepared from chlorosulfamide **S9t** (86 mg, 0.2 mmol) according to general procedure I. After irradiating for 1 hour, the product was isolated as a colorless oil (65 mg, 76% yield) following purification by silica gel column chromatography (Gradient: 100% hexanes  $\rightarrow$  4:1  $CH_2Cl_2$ /hexanes  $\rightarrow$  100%  $CH_2Cl_2$ ).

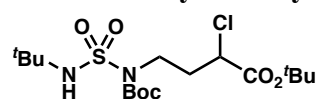

$^1H$  NMR (400 MHz,  $CDCl_3$ )  $\delta$  5.30 (br s, 1H), 4.24 (dd,  $J$  = 8.5, 4.8 Hz, 1H), 3.84 (t,  $J$  = 7.4 Hz, 2H), 2.42–2.33 (m, 1H), 2.29–2.22 (m, 1H), 1.54 (s, 9H), 1.49 (s, 9H), 1.30 (s, 9H).

$^{13}C$  NMR (126 MHz,  $CDCl_3$ )  $\delta$  167.8, 151.9, 84.1, 83.0, 55.9, 55.2, 44.1, 34.4, 29.4, 28.1, 27.7.

IR (neat)  $\nu$  3318 (br), 2977 (w), 2935 (w), 1710 (m), 1476 (w), 1425 (w), 1393 (w), 1368 (m), 1353 (m), 1293 (m), 1254 (m), 1139 (s), 1040 (w), 988 (w), 912 (w), 845 (m), 773 (w), 711 (m), 604 (m), 576 (m)  $cm^{-1}$ .

TLC  $R_f$  = 0.17 in 6:4  $CH_2Cl_2$ /hexanes.

HRMS (ESI)  $m/z$ :  $[M - H]^-$  Calcd for  $C_{17}H_{32}ClN_2O_6S$  427.1669; Found 427.1664.

***N*-tert-Butoxycarbonyl-*N'*-tert-butyl-*N*-(3-chloro-3-((4-trifluoromethyl)phenyl)prop-1-yl)sulfamide (S10u)**

Prepared from chlorosulfamide **S9u** (94 mg, 0.2 mmol) according to general procedure I. After irradiating for 2 hours, the product was isolated as a white solid (46 mg, 49% yield) after two purifications by silica gel column chromatography (100% PhH).

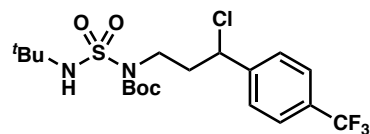

$^1\text{H}$  NMR (400 MHz,  $\text{CDCl}_3$ )  $\delta$  7.63 (d,  $J = 8.3$  Hz, 2H), 7.53 (d,  $J = 8.3$  Hz, 2H), 5.31 (br s, 1H), 4.94 (dd,  $J = 7.5$  Hz, 6.6 Hz, 1H), 3.76–3.92 (m, 2H), 2.41–2.46 (m, 2H), 1.53 (s, 9H), 1.30 (s, 9H).

$^{13}\text{C}$  NMR (126 MHz,  $\text{CDCl}_3$ ,  $^1\text{H}$  and  $^{19}\text{F}$  decoupled)  $\delta$  151.9, 144.8, 130.6, 127.3, 125.8, 123.8, 84.2, 59.5, 55.3, 44.9, 39.3, 29.4, 28.1.

$^{19}\text{F}$  NMR (376 MHz,  $\text{CDCl}_3$ )  $\delta$  -62.73.

IR (neat)  $\nu$  3325 (br w), 2977 (w), 1709 (m), 1620 (w), 1422 (w), 1394 (m), 1369 (m), 1353 (m), 1323 (s), 1294 (m), 1257 (m), 1160 (s), 1125 (s), 1092 (w), 1068 (s), 1042 (w), 1017 (w), 990 (w), 845 (m), 774 (w), 714 (m), 626 (w), 603 (m), 579 (w)  $\text{cm}^{-1}$ .

TLC  $R_f = 0.24$  in 9:1 hexanes:EtOAc.

HRMS (ESI)  $m/z$ :  $[\text{M} + \text{Na}]^+$  Calcd for  $\text{C}_{19}\text{H}_{28}\text{ClF}_3\text{N}_2\text{O}_4\text{S}\cdot\text{Na}$  495.1303; Found 495.1298.

#### *N*-tert-Butoxycarbonyl-*N*-(3-chloropent-1-yl)-*N'*-(2,2,2-trifluoroethyl)sulfamide (S10v)

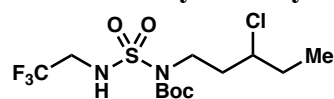

Prepared from chlorosulfamide **S9v** (77 mg, 0.2 mmol) according to general procedure I. After irradiating for 30 minutes, the product was isolated as a colorless oil (50 mg, 65% yield) after purification on a

Teledyne Isco CombiFlash $R_f$  system using a Redi Sep  $R_f$  normal phase silica gel column (9:1 hexanes/EtOAc).

$^1\text{H}$  NMR (400 MHz,  $\text{CDCl}_3$ )  $\delta$  5.92 (t,  $J = 7.1$  Hz, 1H), 3.94–3.65 (m, 5H), 2.15–1.95 (m, 2H), 1.84–1.69 (m, 2H), 1.53 (s, 9H), 1.03 (t,  $J = 7.3$  Hz, 3H).

$^{13}\text{C}$  NMR (126 MHz,  $\text{CDCl}_3$ )  $\delta$  151.6, 123.4 (q,  $J = 278.7$  Hz), 84.9, 62.1, 45.2 (q,  $J = 35.1$  Hz), 37.7, 31.6, 27.9, 10.8.

$^{19}\text{F}$  NMR (376 MHz,  $\text{CDCl}_3$ )  $\delta$  -71.95 (t,  $J = 8.9$  Hz).

IR (neat)  $\nu$  3302 (br), 2976 (w), 1707 (m), 1368 (m), 1277 (m), 1140 (s), 1045 (w), 831 (m), 795 (m), 773 (m), 718 (s), 663 (m)  $\text{cm}^{-1}$ .

TLC  $R_f = 0.36$  in 8:2 hexanes/EtOAc.

HRMS (ESI)  $m/z$ :  $[\text{M} + \text{NH}_4]^+$  Calcd for  $\text{C}_{12}\text{H}_{22}\text{ClF}_3\text{N}_2\text{O}_4\text{S}\cdot\text{NH}_4$  400.1284; Found 400.1269.

#### *N*-tert-Butoxycarbonyl-*N*-(3-chloropent-1-yl)-*N'*-ethylsulfamide (S10w)

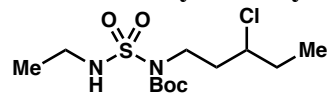

Prepared from chlorosulfamide **S9w** (66 mg, 0.2 mmol) according to general procedure I. After irradiating for 45 minutes, the product was isolated as a colorless oil (29 mg, 44% yield) after purification on a

Teledyne Isco CombiFlash $R_f$  system using a Redi Sep  $R_f$  normal phase silica gel column (9:1 hexanes/EtOAc).

$^1\text{H}$  NMR (400 MHz,  $\text{CDCl}_3$ )  $\delta$  5.24 (t,  $J = 6.2$  Hz, 1H), 3.95–3.74 (m, 3H), 3.03 (qd,  $J = 7.2, 5.9$  Hz, 2H), 2.16–1.96 (m, 2H), 1.85–1.68 (m, 2H), 1.53 (s, 9H), 1.19 (t,  $J = 7.3$  Hz, 3H), 1.03 (t,  $J = 7.3$  Hz, 3H).

$^{13}\text{C}$  NMR (126 MHz,  $\text{CDCl}_3$ )  $\delta$  151.6, 83.9, 62.0, 45.1, 38.7, 37.6, 31.3, 27.8, 14.1, 10.6.

IR (neat)  $\nu$  3310 (br), 2975 (w), 2937 (w), 1705 (m), 1345 (m), 1286 (m), 1251 (m), 1137 (s), 1063 (m), 846 (m), 794 (m), 773 (m), 714 (s)  $\text{cm}^{-1}$ .

TLC  $R_f = 0.33$  in 8:2 hexanes/EtOAc.

HRMS (ESI)  $m/z$ :  $[\text{M} + \text{Na}]^+$  Calcd for  $\text{C}_{12}\text{H}_{25}\text{ClN}_2\text{O}_4\text{S}\cdot\text{Na}$  351.1121; Found 351.1110.



VIII. Preparation and characterization of non- $\gamma$ -chlorinated sulfamides.***N*-tert-Butoxycarbonyl-*N'*-tert-butyl-*N*-(4-chloropent-1-yl)sulfamide (7i)**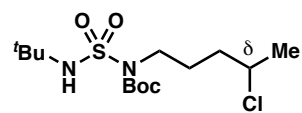

Prepared from sulfamide **S5a** (268 mg, 1.1 mmol) and 4-chloropentanol<sup>6</sup> (100 mg, 0.82 mmol) following general procedure F. The product was obtained as a colorless oil (216 mg, 44% yield) following purification on a Teledyne Isco CombiFlashR<sub>f</sub> system using a Redi Sep R<sub>f</sub> normal phase silica gel column (Gradient: 100% hexanes → 9:1 hexanes/EtOAc).

<sup>1</sup>H NMR (400 MHz, CDCl<sub>3</sub>)  $\delta$  5.30 (br s, 1H), 4.09–4.01 (m, 1H), 3.68 (t,  $J$  = 3.7 Hz, 2H), 1.94–1.89 (m, 1H), 1.85–1.71 (m, 3H), 1.53 (s, 9H), 1.52 (d,  $J$  = 10.5 Hz, 3H), 1.30 (s, 9H).

<sup>13</sup>C NMR (101 MHz, CDCl<sub>3</sub>)  $\delta$  152.0, 83.5, 57.9, 54.9, 46.6, 37.0, 29.3, 28.0, 26.6, 25.2.

IR (neat)  $\nu$  3293 (br), 2975 (m), 2933 (w), 2872 (w), 1699 (s), 1396 (m), 1369 (m), 1346 (s), 1307 (m), 1287 (m), 1254 (m), 1203 (m), 1164 (s), 1135 (s), 1072 (m), 1043 (m), 1001 (m), 869 (w), 843 (m), 794 (m), 769 (m), 711 (s), 677 (m), 642 (s) cm<sup>-1</sup>.

TLC R<sub>f</sub> = 0.51 in 8:2 hexanes:EtOAc.

HRMS (ESI)  $m/z$ : [M – H]<sup>-</sup> Calcd for C<sub>14</sub>H<sub>28</sub>ClN<sub>2</sub>O<sub>4</sub>S 355.1458; Found 355.1457.

***N*-tert-Butyl-*N'*-(4-chlorohex-1-yl)-*N'*-(2,2,2-trifluoroethyl)sulfamide (7m)**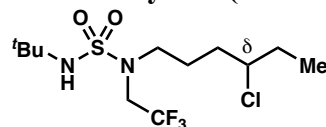

Prepared from *N*-(tert-butyl)-*N'*-(2,2,2-trifluoroethyl)sulfamide<sup>11</sup> (152 mg, 0.65 mmol) and **S1** (68 mg, 0.5 mmol) following general procedure F. The product was obtained as a colorless oil (100 mg, 57% yield) after purification by silica gel column chromatography

(Gradient: 100% hexanes → 20:1 hexanes/EtOAc).

<sup>1</sup>H NMR (400 MHz, CDCl<sub>3</sub>)  $\delta$  4.02 (br s, 1H), 3.88–3.78 (m, 3H), 3.32 (t,  $J$  = 7.5 Hz, 2H), 1.99–1.89 (m, 1H), 1.83–1.66 (m, 5H), 1.34 (s, 9H), 1.03 (t,  $J$  = 7.3 Hz, 3H).

<sup>13</sup>C NMR (126 MHz, CDCl<sub>3</sub>)  $\delta$  124.4 (q,  $J$  = 280.6 Hz), 64.9, 54.9, 48.7, 48.1 (q,  $J$  = 34.5 Hz), 34.9, 31.5, 29.7, 24.1, 10.9.

<sup>19</sup>F NMR (376 MHz, CDCl<sub>3</sub>)  $\delta$  –69.41 (t,  $J$  = 8.9 Hz).

IR (neat)  $\nu$  3288 (br), 2972 (w), 1464 (w), 1429 (w), 1393 (w), 1369 (w), 1315 (m), 1273 (m), 1234 (w), 1141 (s), 1082 (w), 1042 (m), 992 (s), 909 (w), 871 (m), 831 (w), 771 (m), 733 (m), 662 (m), 603 (m), 565 (m) cm<sup>-1</sup>.

TLC R<sub>f</sub> = 0.43 in 4:1 hexanes:EtOAc.

HRMS (ESI)  $m/z$ : [M – H]<sup>-</sup> Calcd for C<sub>12</sub>H<sub>24</sub>ClF<sub>3</sub>N<sub>2</sub>O<sub>2</sub>S 351.1126; Found 351.1118.

***N*-tert-Butoxycarbonyl-*N*-(4-chlorohex-1-yl)-*N'*-(2,2,2-trifluoroethyl)sulfamide (7o)**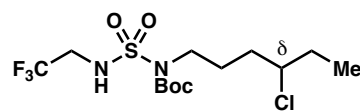

Prepared from sulfamide **S5b** (181 mg, 0.65 mmol) and **S1** (68 mg, 0.5 mmol) following general procedure F. The product was obtained as a colorless oil (133 mg, 67% yield) after purification by silica gel column chromatography (20:1 hexanes:EtOAc).

<sup>1</sup>H NMR (400 MHz, CDCl<sub>3</sub>)  $\delta$  5.84 (t,  $J$  = 6.6 Hz, 1H), 3.88–3.82 (m, 1H), 3.72–3.64 (m, 4H), 1.95–1.87 (m, 1H), 1.81–1.69 (m, 5H), 1.53 (s, 9H), 1.03 (t,  $J$  = 7.3 Hz, 3H).

<sup>13</sup>C NMR (126 MHz, CDCl<sub>3</sub>)  $\delta$  151.7, 123.4 (q,  $J$  = 279.1 Hz), 84.7, 64.8, 47.5, 45.2 (q,  $J$  = 35.5 Hz), 34.8, 31.5, 27.9, 26.7, 10.8.

$^{19}\text{F}$  NMR (376 MHz,  $\text{CDCl}_3$ )  $\delta$  -71.95 (t,  $J$  = 9.0 Hz).

IR (neat)  $\nu$  3300 (br), 2975 (w), 1706 (m), 1456 (w), 1369 (m), 1276 (m), 1140 (s), 993 (w), 963 (m), 912 (w), 832 (m), 774 (m), 718 (s), 664 (m), 630 (m), 582 (m), 549 (m)  $\text{cm}^{-1}$ .

TLC  $R_f$  = 0.18 in 9:1 hexanes:EtOAc.

HRMS (ESI)  $m/z$ :  $[\text{M} - \text{H}]^-$  Calcd for  $\text{C}_{13}\text{H}_{24}\text{ClF}_3\text{N}_2\text{O}_4\text{S}$  395.1025; Found 395.1017.

***N*-tert-Butyl-*N'*-(4-chloro-4-methylpentyl)-*N''*-(2,2,2-trifluoroethyl)sulfamide (7p).**

Isolated for characterization by silica gel column chromatography (Gradient: 100% hexanes  $\rightarrow$  50:1 hexanes:EtOAc) from a mixture of chlorinated isomers (**4p**, **7p** and **S11p**).

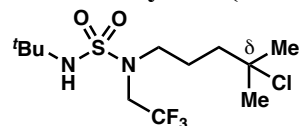

$^1\text{H}$  NMR (400 MHz,  $\text{CDCl}_3$ )  $\delta$  3.97 (br s, 1H), 3.83 (q,  $J$  = 3.9 Hz, 2H), 3.33 (dd,  $J$  = 7.7, 7.7 Hz, 2H), 1.92–1.84 (m, 2H), 1.74–1.70 (m, 2H), 1.59 (s, 6H), 1.35 (s, 9H).

$^{13}\text{C}$  NMR (126 MHz,  $\text{CDCl}_3$ )  $\delta$  124.5 (q,  $J$  = 278.3 Hz), 70.2, 55.0, 49.1, 48.1, (q,  $J$  = 33.7 Hz), 42.6, 32.4, 29.8, 22.9.

$^{19}\text{F}$  NMR (376 MHz,  $\text{CDCl}_3$ )  $\delta$  -69.41 (t,  $J$  = 9.0 Hz).

IR (neat)  $\nu$  3290 (br), 2974 (w), 2922 (w), 1428 (w), 1393 (w), 1370 (w), 1320 (m), 1273 (m), 1227 (w), 1141 (s), 1068 (m), 990 (m), 907 (w), 870 (w), 831 (w), 770 (w), 734 (w), 664 (m), 604 (m), 570 (m), 518 (w)  $\text{cm}^{-1}$ .

TLC  $R_f$  = 0.42 in 4:1 hexanes:EtOAc.

HRMS (ESI)  $m/z$ :  $[\text{M} + \text{H}]^+$  Calcd for  $\text{C}_{12}\text{H}_{24}\text{ClF}_3\text{N}_2\text{O}_2\text{S}$  353.1272; Found 353.1274.

***N*-tert-Butyl-*N'*-(2-chloro-4-methylpentyl)-*N''*-(2,2,2-trifluoroethyl)sulfamide (S11p).**

Prepared from *N*-(tert-butyl)-*N''*-(2,2,2-trifluoroethyl)sulfamide (111 mg, 0.48 mmol) and 2-chloro-4-methylpentanol (50 mg, 0.37 mmol), following general procedure F. The product was obtained as a colorless oil (70 mg, 53% yield) after purification by silica gel column chromatography (Gradient: 100% hexanes  $\rightarrow$  50:1 hexanes:EtOAc).

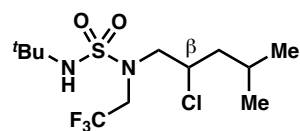

$^1\text{H}$  NMR (400 MHz,  $\text{CDCl}_3$ )  $\delta$  4.40–4.35 (m, 1H), 4.10–3.97 (m, 3H), 3.70 (dd,  $J$  = 15.6, 4.2 Hz, 1H), 3.40 (dd,  $J$  = 15.6, 9.0 Hz, 1H), 1.95–1.87 (m, 1H), 1.65–1.59 (m, 1H), 1.52–1.47 (m, 1H), 1.36 (s, 9H), 0.96 (d,  $J$  = 6.6 Hz, 3H), 0.91 (d,  $J$  = 6.6 Hz, 3H).

$^{13}\text{C}$  NMR (126 MHz,  $\text{CDCl}_3$ )  $\delta$  124.4 (q,  $J$  = 282.3 Hz), 59.5, 55.4, 55.2, 49.9 (q,  $J$  = 33.6 Hz), 44.7, 29.8, 25.0, 23.0, 21.1.

$^{19}\text{F}$  NMR (376 MHz,  $\text{CDCl}_3$ )  $\delta$  -69.27 (t,  $J$  = 7.9 Hz).

IR (neat)  $\nu$  3287 (br), 2962 (w), 1717 (w), 1471 (w), 1429 (w), 1394 (w), 1369 (w), 1328 (m), 1273 (m), 1204 (w), 1143 (s), 1078 (w), 1036 (m), 989 (m), 940 (m), 907 (w), 870 (w), 823 (w), 767 (w), 739 (w), 663 (m), 613 (m), 560 (m), 520 (w), 486 (w)  $\text{cm}^{-1}$ .

TLC  $R_f$  = 0.57 in 4:1 hexanes:EtOAc.

HRMS (ESI)  $m/z$ :  $[\text{M} + \text{H}]^+$  Calcd for  $\text{C}_{12}\text{H}_{24}\text{ClF}_3\text{N}_2\text{O}_2\text{S}$  353.1272; Found 353.1273.

***N*-tert-Butoxycarbonyl-*N*-(4-chloropent-1-yl)-*N'*-(2,2,2-trifluoroethyl)sulfamide (S12v)**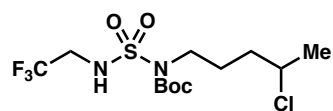

Prepared from sulfamide **S5b** (295 mg, 1.1 mmol) and 4-chloropentanol<sup>6</sup> (100 mg, 0.82 mmol) following general procedure F. The product was obtained as a colorless oil (217 mg, 70% yield) following purification on a Teledyne Isco CombiFlashR<sub>f</sub> system using a Redi Sep R<sub>f</sub> normal phase silica gel column (4:1 hexanes/EtOAc).

<sup>1</sup>H NMR (400 MHz, CDCl<sub>3</sub>) δ 5.78 (br s, 1H), 4.08–4.00 (m, 1H), 3.72–3.66 (m, 4H), 1.92–1.87 (m, 1H), 1.80–1.69 (m, 3H), 1.53 (s, 9H), 1.52 (d, *J* = 6.4 Hz, 3H).

<sup>13</sup>C NMR (126 MHz, CDCl<sub>3</sub>) δ 151.6, 123.4 (q, *J* = 279.0 Hz), 84.7, 57.9, 47.5, 45.1 (q, *J* = 35.3 Hz), 36.9, 27.8, 26.7, 25.2.

<sup>19</sup>F NMR (376 MHz, CDCl<sub>3</sub>) δ -71.93 (t, *J* = 8.9 Hz).

IR (neat) ν 3299 (br), 2978 (w), 1705 (m), 1368 (m), 1278 (m), 1139 (s), 1010 (w), 910 (w), 832 (m), 796 (w), 773 (w), 718 (s), 664 (m), 611 (m) cm<sup>-1</sup>.

TLC R<sub>f</sub> = 0.45 in 8:2 hexanes:EtOAc.

HRMS (ESI) *m/z*: [M - H]<sup>-</sup> Calcd for C<sub>12</sub>H<sub>21</sub>ClF<sub>3</sub>N<sub>2</sub>O<sub>4</sub>S 381.0862; Found 381.0862.

***N*-tert-Butoxycarbonyl-*N*-(4-chloropent-1-yl)-*N'*-ethylsulfamide (S12w)**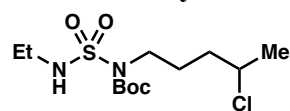

Prepared from sulfamide **S5c** (238 mg, 1.1 mmol) and 4-chloropentanol<sup>6</sup> (100 mg, 0.82 mmol, following general procedure F. The product was obtained as a colorless oil (268 mg, ≥ 98% yield) following purification on a Teledyne Isco CombiFlashR<sub>f</sub> system using a Redi Sep R<sub>f</sub> normal phase silica gel column (9:1 hexanes/EtOAc).

<sup>1</sup>H NMR (400 MHz, CDCl<sub>3</sub>) δ 5.20 (t, *J* = 5.0 Hz, 1H), 4.09–4.01 (m, 1H), 3.68 (t, *J* = 7.0 Hz, 2H), 3.04 (qd, *J* = 7.2, 6.3 Hz, 2H), 1.94–1.87 (m, 1H), 1.79–1.70 (m, 3H), 1.53 (m, 9H), 1.52 (d, *J* = 7.8 Hz, 3H), 1.20 (t, *J* = 7.3 Hz, 3H).

<sup>13</sup>C NMR (101 MHz, CDCl<sub>3</sub>) δ 151.7, 83.7, 57.8, 46.8, 38.7, 36.9, 27.8, 26.7, 25.1, 14.2.

IR (neat) ν 3311 (br), 2976 (w), 1703 (m), 1357 (m), 1286 (m), 1256 (m), 1135 (s), 1062 (m), 1009 (w), 844 (m), 794 (m), 773 (m), 714 (s) cm<sup>-1</sup>.

TLC R<sub>f</sub> = 0.36 in 8:2 hexanes:EtOAc.

HRMS (ESI) *m/z*: [M - H]<sup>-</sup> Calcd for C<sub>12</sub>H<sub>24</sub>ClN<sub>2</sub>O<sub>4</sub>S 327.1145; Found 327.1145.

## IX. Preparation and characterization of sulfamate ester derivatives.

4-Methylpentyl *tert*-butylsulfamate (S13a)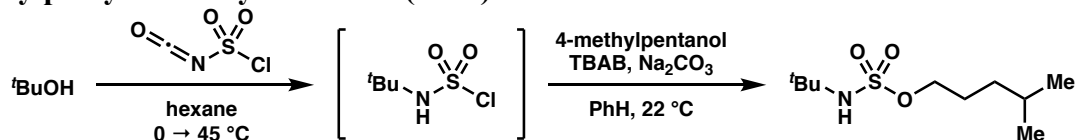

To a flame-dried round bottom flask equipped with magnetic stir bar and fitted with a rubber septum and nitrogen inlet was added hexanes (50 mL, 0.6 M). The reaction flask was then cooled at 0 °C in an ice water bath. *Tert*-butanol (4.3 mL, 30 mmol, 1.5 equiv) and chlorosulfonyl isocyanate (3.9 mL, 45 mmol, 1.5 equiv) were then sequentially added dropwise via syringe. Upon complete addition, the ice water bath was removed and replaced with an oil bath. The oil bath was heated to 45 °C and the reaction was stirred for 3 h. After 3 h, the reaction was removed from heat and allowed to cool to room temperature. The suspension was then concentrated under reduced pressure to remove all volatile materials. The crude material was then taken up in anhydrous benzene (50 mL, 0.60 M) and *tetra*-butylammonium bromide (TBAB, 0.97 g, 3.0 mmol, 0.1 equiv), 4-methylpentanol (3.06 g, 30 mmol, 1.0 equiv), and sodium carbonate (9.54 g, 90 mmol, 3.0 equiv) were added sequentially. Following addition, the reaction was left to stir at 22 °C for 18 h.

After 18 h, the reaction was quenched by dropwise addition of 1 M HCl until the aqueous phase reached a pH = 1.0. The biphasic solution was then transferred to a separatory funnel rinsing the flask with EtOAc (~50 mL) to achieve quantitative transfer. The organic phase was separated and the aqueous phase was extracted twice more with EtOAc (2 x 50 mL). The combined organic layers were washed once with brine (~50 mL), dried with MgSO<sub>4</sub>, filtered, and concentrated under reduced pressure. The product was obtained as a colorless oil (3.06 g, 43% yield) following silica gel column chromatography (9:1 hexanes:EtOAc).

<sup>1</sup>H NMR (400 MHz, CDCl<sub>3</sub>) δ 4.27 (br s, 1H), 4.09 (t, *J* = 6.7 Hz, 2H), 1.76–1.69 (m, 2H), 1.61–1.54 (m, 1H), 1.36 (s, 9H), 1.31–1.25 (m, 2H), 0.90 (d, *J* = 6.6 Hz, 6H).

<sup>13</sup>C NMR (126 MHz, CDCl<sub>3</sub>) δ 70.7, 54.6, 34.6, 29.7, 27.6, 26.7, 22.4.

IR (neat)  $\nu$  3299 (br), 2957 (w), 2872 (w), 1469 (w), 1431 (w), 1394 (w), 1345 (m), 1231 (w), 1161 (s), 1041 (w), 981 (m), 917 (w), 875 (w), 802 (w), 731 (w), 618 (w), 587 (w), 514 (w), 463 (w) cm<sup>-1</sup>.

TLC R<sub>f</sub> = 0.50 in hexanes:EtOAc 4:1.

HRMS (ESI) *m/z*: [M + NH<sub>4</sub>]<sup>+</sup> Calcd for C<sub>10</sub>H<sub>23</sub>NO<sub>3</sub>S•NH<sub>4</sub> 255.1737; Found 255.1742.

## 4-Methylpentyl (2,2,2-trifluoroethyl)sulfamate (S13b)

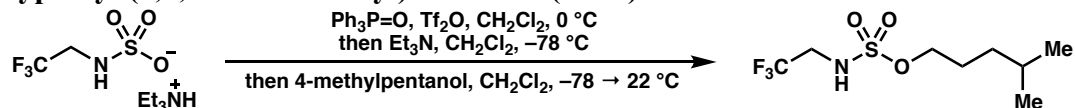

Following a literature procedure,<sup>11</sup> a flame-dried round bottom flask equipped with magnetic stir bar was charged with triphenylphosphine oxide (2.3 g, 8.25 mmol, 1.65 equiv) and fitted with a rubber septum. The flask was evacuated and backfilled with N<sub>2</sub>. Anhydrous CH<sub>2</sub>Cl<sub>2</sub> (25 mL) was added and the flask was cooled at 0 °C in an ice water bath. Trifluoromethanesulfonic anhydride

(1.25 mL) that had been freshly removed from the glovebox was then added to the cooled solution dropwise via syringe. The reaction was allowed to stir at 0 °C in an ice water bath for 15 minutes. A solution of sulfamic acid salt (2.1 g, 7.5 mmol, 1.5 equiv) in CH<sub>2</sub>Cl<sub>2</sub> (4.0 mL) was added to the activated Ph<sub>3</sub>PO via cannula transfer. The flask was rinsed with additional CH<sub>2</sub>Cl<sub>2</sub> (1 mL) to achieve quantitative transfer. The resulting pale yellow solution was stirred for 15 minutes at 0 °C. During this time, a clean, flame-dried round bottom flask equipped with stir bar was fitted with a rubber septum and subsequently evacuated and backfilled with N<sub>2</sub>. This process was repeated two more times. The flask was then charged with Et<sub>3</sub>N (2.1 mL, 15.0 mmol, 3.0 equiv) and CH<sub>2</sub>Cl<sub>2</sub> (20 mL) and the mixture was cooled at -78 °C in an <sup>i</sup>PrOH/dry ice bath. The activated sulfamic acid salt solution was transferred dropwise to the Et<sub>3</sub>N solution via cannula (during which time an intense red color developed), rinsing the flask with additional CH<sub>2</sub>Cl<sub>2</sub> (5 mL) to achieve quantitative transfer. The resultant solution was stirred at -78 °C for 15 minutes. 4-Methylpentanol (511 mg, 5.0 mmol, 1.0 equiv) was then added as a solution in CH<sub>2</sub>Cl<sub>2</sub> (5 mL) to the Et<sub>3</sub>N solution via canula. The alcohol-containing flask was rinsed with additional CH<sub>2</sub>Cl<sub>2</sub> (1 mL) to achieve quantitative transfer. Without removing the cooling bath, the reaction was then stirred for 18 h, during which time no additional dry ice was added and the mixture warmed to room temperature.

After 18 h, the reaction was diluted with 1 M HCl (~20 mL) and H<sub>2</sub>O (~30 mL). The biphasic mixture was transferred to a separatory funnel, rinsing the flask with CH<sub>2</sub>Cl<sub>2</sub> to achieve quantitative transfer. The organic phase was separated and the aqueous phase was extracted twice more with CH<sub>2</sub>Cl<sub>2</sub> (2 x ~40 mL). The combined organic phases were dried with MgSO<sub>4</sub>, filtered, and concentrated under reduced pressure. The product was obtained as a white powder (958 mg, 73% yield) following silica gel column chromatography (8:1 hexanes:EtOAc).

<sup>1</sup>H NMR (400 MHz, CDCl<sub>3</sub>) δ 5.04 (br s, 1H), 4.16 (t, *J* = 6.6 Hz, 2H), 3.78–3.70 (m, 2H), 1.77–1.70 (m, 2H), 1.60–1.54 (m, 1H), 1.29–1.24 (m, 2H), 0.89 (d, *J* = 6.6 Hz, 6H).

<sup>13</sup>C NMR (126 MHz, CDCl<sub>3</sub>) δ 123.4 (q, *J* = 278.3), 72.3, 45.0 (q, *J* = 36.0), 34.3, 27.6, 26.5, 22.3.

<sup>19</sup>F NMR (376 MHz, CDCl<sub>3</sub>) δ -72.73 (t, *J* = 8.6 Hz).

IR (neat) ν 3296 (br), 2962 (w), 1465 (w), 1409 (w), 1348 (m), 1276 (m), 1154 (s), 1112 (m), 1061 (w), 961 (s), 924 (m), 871 (m), 835 (m), 804 (w), 737 (w), 664 (m), 561 (s), 524 (m), 469 (m) cm<sup>-1</sup>.

TLC R<sub>f</sub> = 0.39 in 4:1 hexanes:EtOAc.

HRMS (ESI) *m/z*: [M + NH<sub>4</sub>]<sup>+</sup> Calcd for C<sub>8</sub>H<sub>16</sub>F<sub>3</sub>NO<sub>3</sub>S 281.1141; Found 281.1147.

#### General Procedure J. Preparation of *N*-chlorosulfamate esters (**9**).

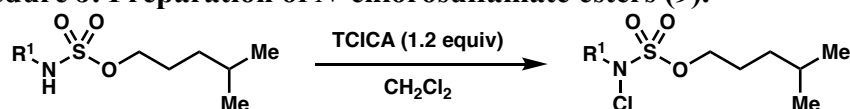

Following a literature procedure,<sup>6b</sup> a round bottom flask equipped with magnetic stir bar was charged with trichloroisocyanuric acid (TCICA, 1.2 equiv) and the flask was evacuated and backfilled with N<sub>2</sub>. Anhydrous CH<sub>2</sub>Cl<sub>2</sub> (0.2 M) was then added to create a suspension. Sulfamate ester **S13** (1.0 equiv) was then added to the suspension via syringe (if oil) or in a single portion

by brief opening of the flask (if solid). The suspension was stirred at 22 °C and monitored by TLC until complete consumption of starting material was observed.

Upon complete consumption of starting material as judged by TLC, the reaction was diluted with H<sub>2</sub>O (~0.2 M) and the biphasic suspension was transferred to a separatory funnel. The reaction flask was rinsed with CH<sub>2</sub>Cl<sub>2</sub> (5 mL) to ensure quantitative transfer. The organic phase was separated and the aqueous phase was extracted twice more with CH<sub>2</sub>Cl<sub>2</sub>. The combined organic phases were dried with MgSO<sub>4</sub>, filtered, and concentrated under reduced pressure. The crude reaction mixtures were then purified by flash column chromatography on silica gel by loading samples as a solid and eluting with a hexanes:EtOAc solvent system as noted below.

#### 4-Methylpentyl *tert*-butylchlorosulfamate ester (9a).

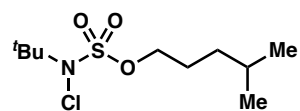

Prepared from sulfamate ester **S13a** (356 mg, 1.5 mmol) and TCICA (418 mg, 1.8 mmol) following general procedure J. The product was obtained as a colorless oil (354 mg, 87% yield) after silica gel flash column chromatography using hexanes:EtOAc (20:1).

<sup>1</sup>H NMR (400 MHz, CDCl<sub>3</sub>) δ 4.27 (t, *J* = 6.7 Hz, 2H), 1.78–1.73 (m, 2H), 1.58–1.55 (m, 1H), 1.49 (s, 9H), 1.31–1.23 (m, 2H), 0.88 (d, *J* = 6.8 Hz, 6H).

<sup>13</sup>C NMR (126 MHz, CDCl<sub>3</sub>) δ 74.5, 67.3, 34.3, 28.4, 27.4, 26.6, 22.3.

IR (neat) ν 2957 (w), 2872 (w), 1468 (w), 1366 (m), 1241 (w), 1191 (m), 1167 (m), 1040 (w), 953 (m), 886 (m), 807 (w), 734 (w), 614 (s), 591 (w), 517 (w), 469 (w), 433 (w) cm<sup>-1</sup>.

TLC R<sub>f</sub> = 0.57 in 10:1 hexanes:EtOAc.

HRMS (ESI) *m/z*: [M + NH<sub>4</sub>]<sup>+</sup> Calcd for C<sub>10</sub>H<sub>22</sub>ClNO<sub>3</sub>S•NH<sub>4</sub> 289.1347; Found 289.1345.

#### 4-Methylpentyl (2,2,2-trifluoroethyl)chlorosulfamate ester (9b).

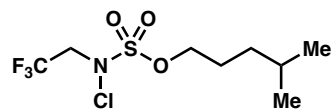

Prepared from sulfamate ester **S13b** (479 mg, 1.8 mmol) and TCICA (508 mg, 2.2 mmol) following general procedure J. The product was obtained as a colorless oil (489 mg, 90% yield) after silica gel flash column chromatography using hexanes:EtOAc (20:1).

<sup>1</sup>H NMR (400 MHz, CDCl<sub>3</sub>) δ 4.39 (t, *J* = 6.5 Hz, 2H), 4.08 (q, *J* = 8.1 Hz, 2H), 1.84–1.77 (m, 2H), 1.63–1.58 (m, 1H), 1.34–1.28 (m, 2H), 0.91 (d, *J* = 6.6 Hz, 6H).

<sup>13</sup>C NMR (126 MHz, CDCl<sub>3</sub>) δ 122.9 (q, *J* = 279.8 Hz), 76.7, 57.2 (q, *J* = 35.6 Hz), 34.2, 27.5, 26.7, 22.3.

<sup>19</sup>F NMR (376 MHz, CDCl<sub>3</sub>) δ -70.51 (t, *J* = 7.8 Hz).

IR (neat) ν 2960 (w), 2874 (w), 1470 (w), 1382 (m), 1310 (m), 1272 (m), 1159 (s), 1072 (w), 963 (s), 930 (s), 844 (m), 736 (w), 689 (m), 648 (m), 574 (s), 520 (w), 471 (m) cm<sup>-1</sup>.

TLC R<sub>f</sub> = 0.65 in 8:1 hexanes:EtOAc.

HRMS (ESI) *m/z*: [M + NH<sub>4</sub>]<sup>+</sup> Calcd for C<sub>8</sub>H<sub>15</sub>ClF<sub>3</sub>NO<sub>3</sub>S•NH<sub>4</sub> 315.0752; Found 315.0746.

**General Procedure K. Sulfamate ester-guided chlorine-transfer reactions.**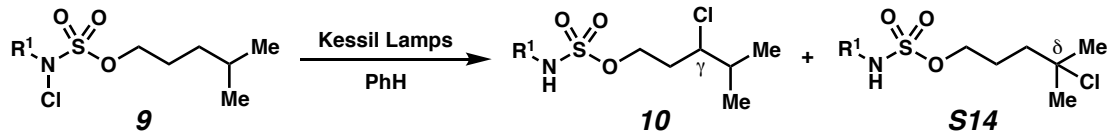

The reactions were performed as described for previously reported sulfamate ester guided chlorination processes.<sup>6b</sup> In a flame-dried microwave vial equipped with magnetic stir bar and sealed with a crimp cap, *N*-chlorosulfamate ester **7** (0.2 mmol, 1.0 equiv) was dissolved in anhydrous PhH (3.0 mL, 0.07 M) under an inert atmosphere. The vial was then placed in between two Kessil lamps (ca. 5 cm away from each light source) and irradiated for 15 minutes. After 15 minutes, the vial was removed from the light, and the reaction was analyzed by TLC. If starting material remained, the reaction was irradiated between two Kessil lamps in 15 minute increments until all starting material had been consumed as judged by TLC.

Upon consumption of starting material as judged by TLC, the reaction solution was transferred to a flask rinsing the microwave vial with CH<sub>2</sub>Cl<sub>2</sub> (ca. 3 mL) to make transfer quantitative. Volatiles were removed under reduced pressure and the crude material was purified by flash column chromatography on silica gel or Florisil by loading the samples as liquids in column eluent and eluting with a hexanes:EtOAc solvent system as noted below.

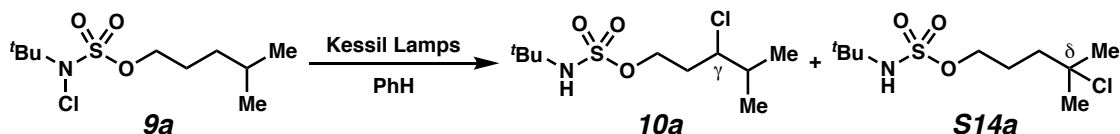

Chlorosulfamate **9a** (54 mg, 0.2 mmol) was subjected to the general procedure. After irradiating for 1 hour, products **10a** and **S14a** (31 mg, 57% yield) were isolated as a mixture following purification by silica gel column chromatography (Gradient: 100% hexanes → 10:1 hexanes/acetone).

In order to determine the ratio of **10a**:**S14a**, duplicate reactions of chlorosulfamide **9a** (8 mg, 0.03 mmol) were subjected to general procedure K. After irradiating for 1 hour, each sample was concentrated under reduced pressure and 1,2,4,5-tetrachloro-3-nitrobenzene (1.0 equiv) was added as an internal standard. <sup>1</sup>H NMR analysis of the crude reaction mixtures revealed a 3.2:1.0 mixture of **10a**:**S14a** and 10% protodehalogenated material as an average of two runs.

Sample 1: 57% yield **10a**, 18% yield **S14a**, 7% yield protodehalogenated **S13a**.

Sample 2: 56% yield **10a**, 18% yield **S14a**, 12% yield protodehalogenated **S13a**.

**3-Chloro-4-methylpentyl tert-butylsulfamate (10a).**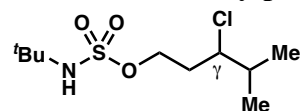

Isolated for characterization by silica gel column chromatography (Gradient: 100% hexanes → 25:1 hexanes:EtOAc) from a mixture of chlorinated isomers (**10a** and **S14a**).

$^1\text{H}$  NMR (400 MHz,  $\text{CDCl}_3$ )  $\delta$  4.41 (br s, 1H), 4.32–4.29 (m, 2H), 3.99 (ddd,  $J = 6.7, 2.6, 2.6$  Hz, 1H), 2.21–2.13 (m, 1H), 2.03–1.94 (m, 2H), 1.37 (s, 9H), 1.04 (d,  $J = 6.7$  Hz, 3H), 0.99 (d,  $J = 6.7$  Hz).

$^{13}\text{C}$  NMR (126 MHz,  $\text{CDCl}_3$ )  $\delta$  67.5, 65.4, 54.7, 35.0, 34.4, 29.5, 19.7, 17.1.

IR (neat)  $\nu$  3298 (w), 2969 (w), 1467 (w), 1430 (w), 1394 (m), 1369 (m), 1345 (m), 1232 (w), 1206 (w), 1159 (s), 1084 (w), 1043 (w), 986 (s), 914 (m), 884 (m), 832 (w), 781 (m), 616 (m), 591 (w), 513 (m), 471 (w)  $\text{cm}^{-1}$ .

TLC  $R_f = 0.47$  in 4:1 hexanes:EtOAc.

HRMS (ESI)  $m/z$ :  $[\text{M} - \text{H}]^-$  Calcd for  $\text{C}_{10}\text{H}_{22}\text{ClNO}_3\text{S}$  270.0936; Found 270.0932.

#### 4-Chloro-4-methylpentyl *tert*-butylsulfamate (S14a).

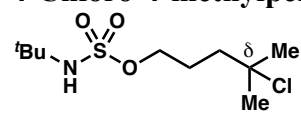 Isolated for characterization by silica gel column chromatography (Gradient: 100% hexanes  $\rightarrow$  25:1 hexanes:EtOAc) from a mixture of chlorinated isomers (**10a** and **S14a**).

$^1\text{H}$  NMR (400 MHz,  $\text{CDCl}_3$ )  $\delta$  4.32 (br s, 1H), 4.15 (t,  $J = 6.1$  Hz, 2H), 1.99–1.94 (m, 2H), 1.87–1.85 (m, 2H), 1.59 (s, 6H), 1.36 (s, 9H).

$^{13}\text{C}$  NMR (126 MHz,  $\text{CDCl}_3$ )  $\delta$  70.2, 70.0, 54.7, 42.0, 32.4, 29.7, 24.9.

IR (neat)  $\nu$  3297 (br), 2974 (w), 1471 (w), 1430 (w), 1394 (m), 1370 (m), 1343 (m), 1233 (w), 1210 (w), 1159 (s), 981 (m), 924 (m), 874 (m), 804 (m), 733 (m), 615 (m), 587 (m), 512 (m), 425 (w)  $\text{cm}^{-1}$ .

TLC  $R_f = 0.35$  in 4:1 hexanes:EtOAc.

HRMS (ESI)  $m/z$ :  $[\text{M} - \text{H}]^-$  Calcd for  $\text{C}_{10}\text{H}_{22}\text{ClNO}_3\text{S}$  270.0936; Found 270.0931.

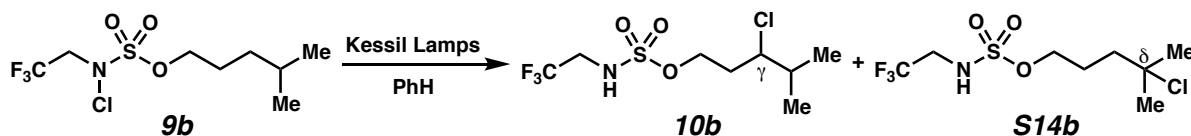

Chlorosulfamate **9b** (60 mg, 0.2 mmol) was subjected to the general procedure. After irradiating for 1 hour, products **10b** and **S14b** (40 mg, 67% yield) were isolated as a mixture following purification by silica gel column chromatography (Gradient: 100% hexanes  $\rightarrow$  10:1 hexanes/acetone).

In order to determine the ratio of **10b**:**S14b**, duplicate reactions of chlorosulfamide **9b** (8 mg, 0.03 mmol) were subjected to general procedure K. After irradiating for 1 hour, each sample was concentrated under reduced pressure and 1,2,4,5-tetrachloro-3-nitrobenzene (1.0 equiv) was added as an internal standard.  $^1\text{H}$  NMR analysis of the crude reaction mixtures revealed a 4:1 mixture of **10b**:**S14b** and 5% protodehalogenated material as an average of two runs.

Sample 1: 56% yield **10b**, 14% yield **S14b**, 5% yield protodehalogenated **S13b**.

Sample 2: 53% yield **10b**, 13% yield **S14b**, 4% yield protodehalogenated **S13b**.

#### 3-Chloro-4-methylpentyl (2,2,2-trifluoroethyl)sulfamate (10b).

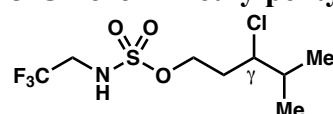 Isolated for characterization by silica gel column chromatography (Gradient: 100% hexanes  $\rightarrow$  25:1 hexanes:EtOAc) from a mixture of chlorinated isomers (**10b** and **S14b**).



$^1\text{H}$  NMR (400 MHz,  $\text{CDCl}_3$ )  $\delta$  5.13 (t,  $J$  = 6.5 Hz, 1H), 4.40–4.37 (m, 2H), 3.97 (ddd,  $J$  = 6.7, 4.0, 4.0 Hz, 1H), 3.80–3.72 (m, 2H), 2.22–2.14 (m, 1H), 2.04–1.94 (m, 2H), 1.04 (d,  $J$  = 6.7 Hz, 3H), 0.99 (d,  $J$  = 6.7 Hz, 3H).

$^{13}\text{C}$  NMR (126 MHz,  $\text{CDCl}_3$ )  $\delta$  123.3 (q,  $J$  = 278.3 Hz), 69.1, 65.0, 45.2 (q,  $J$  = 35.8 Hz), 34.7, 34.4, 19.6, 17.2.

$^{19}\text{F}$  NMR (376 MHz,  $\text{CDCl}_3$ )  $\delta$  -72.67 (t,  $J$  = 8.6 Hz).

IR (neat)  $\nu$  3307 (br), 2970 (w), 1465 (w), 1359 (m), 1275 (m), 1152 (s), 1044 (w), 963 (m), 918 (m), 868 (m), 816 (w), 777 (m), 664 (m), 561 (s), 512 (m), 471 (w), 439 (w)  $\text{cm}^{-1}$ .

TLC  $R_f$  = 0.41 in 4:1 hexanes:EtOAc.

HRMS (ESI)  $m/z$ :  $[\text{M} - \text{H}]^-$  Calcd for  $\text{C}_8\text{H}_{15}\text{ClF}_3\text{NO}_3\text{S}$  296.0341; Found 296.0334.

#### 4-Chloro-4-methylpentyl (2,2,2-trifluoroethyl)sulfamate (S14b).

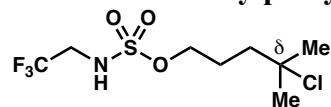

Isolated for characterization by silica gel column chromatography (Gradient: 100% hexanes  $\rightarrow$  25:1 hexanes:EtOAc) from a mixture of chlorinated isomers (**10b** and **S14b**).

$^1\text{H}$  NMR (400 MHz,  $\text{CDCl}_3$ )  $\delta$  4.90 (t,  $J$  = 6.3 Hz, 1H), 4.24 (t,  $J$  = 6.0 Hz, 2H), 3.20–3.72 (m, 2H), 2.02–1.95 (m, 2H), 1.86–1.82 (m, 2H), 1.59 (s, 6H).

$^{13}\text{C}$  NMR (126 MHz,  $\text{CDCl}_3$ )  $\delta$  123.3 (q,  $J$  = 277.1 Hz), 71.7, 69.8, 45.2 (q,  $J$  = 35.7 Hz), 41.7, 32.4, 24.7.

$^{19}\text{F}$  NMR (376 MHz,  $\text{CDCl}_3$ )  $\delta$  -72.67 (t,  $J$  = 8.8 Hz).

IR (neat)  $\nu$  3304 (br), 2923 (w), 2850 (w), 1457 (w), 1361 (m), 1276 (m), 1156 (s), 966 (m), 929 (m), 861 (w), 739 (w), 665 (w), 563 (m), 512 (w)  $\text{cm}^{-1}$ .

TLC  $R_f$  = 0.26 in 4:1 hexanes:EtOAc.

HRMS (ESI)  $m/z$ :  $[\text{M} - \text{H}]^-$  Calcd for  $\text{C}_8\text{H}_{15}\text{ClF}_3\text{NO}_3\text{S}$  296.0341; Found 296.0333.

**X. Sulfamide cleavage to access 3-chloroalkylamines.**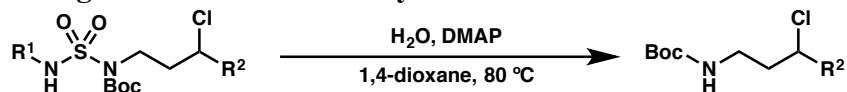

A clean microwave vial equipped with a stir bar was charged with sulfamide (1 equiv) and DMAP (1.5 equiv) and sealed with an aluminum seal cap. The vial was evacuated and backfilled with N<sub>2</sub> and the process was repeated two more times. 1,4-dioxane (0.13 M) and H<sub>2</sub>O (2 equiv) were then added via syringe and the resulting solution was heated in an oil bath at 80 °C overnight.

After stirring overnight, the suspension was allowed to cool to 21 °C and then concentrated under reduced pressure. The crude mixture was then purified by silica gel flash chromatography as indicated below.

**Methyl 6-((*tert*-butoxycarbonyl)amino)-4-chlorohexanoate (S15k)**

Prepared from sulfamide **4k** (150 mg, 0.36 mmol) according to the general procedure. The product was obtained as a colorless oil (85 mg, 85% yield) following purification on a Teledyne Isco CombiFlashR<sub>f</sub> system using a Redi Sep R<sub>f</sub> normal phase silica gel column (8:2 hexanes/EtOAc).

<sup>1</sup>H NMR (400 MHz, CDCl<sub>3</sub>) δ 4.67 (br s, 1H), 4.02–3.95 (m, 1H), 3.69 (s, 3H), 3.40–3.33 (m, 1H), 3.30–3.23 (m, 1H), 2.61–2.47 (m, 2H), 2.19–2.10 (m, 1H), 2.07–1.91 (m, 2H), 1.87–1.78 (m, 1H), 1.44 (s, 9H).

<sup>13</sup>C NMR (101 MHz, CDCl<sub>3</sub>) δ 173.2, 155.9, 79.3, 60.1, 51.7, 38.4, 37.9, 33.4, 30.8, 28.3.

IR (neat) ν 3364 (br), 2975 (w), 1689 (m), 1514 (m), 1437 (m), 1391 (w), 1365 (w), 1247 (m), 1162 (s), 994 (w), 838 (w), 780 (w), 606 (w) cm<sup>-1</sup>.

TLC R<sub>f</sub> = 0.54 in 6:4 hexanes/EtOAc.

HRMS (ESI) m/z: [M + Na]<sup>+</sup> Calcd for C<sub>12</sub>H<sub>22</sub>ClNO<sub>4</sub>•Na 302.1135; Found 302.1134.

**XI. Preparation and characterization of compounds related to the radical clock experiment*****N*-tert-butyl-*N'*-trifluoro)ethylsulfamide (S8s) (3-(2,2-dimethylcyclopropyl)propan-1-yl)-*N'*-(2,2,2-trifluoro)ethylsulfamide (S8s)**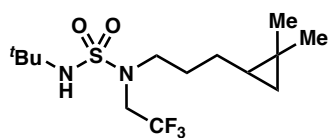

Prepared from *N*-(tert-butyl)-*N'*-(2,2,2-trifluoroethyl)sulfamide (513 mg, 2.2 mmol) and 3-(2,2-dimethylcyclopropyl)propanon-1-ol<sup>12</sup> (216 g, 1.7 mmol) following general procedure F. The product was obtained as a colorless oil (319 mg, 55% yield) after purification by silica gel column chromatography (Gradient: 100% hexanes → 20:1 hexanes:EtOAc).

<sup>1</sup>H NMR (400 MHz, CDCl<sub>3</sub>) δ 4.19 (br s, 1H), 3.80 (q, *J* = 8.9 Hz, 2H), 3.36–3.24 (m, 2H), 1.77–1.69 (m, 2H), 1.33 (s, 9H), 1.28–1.21 (m, 2H), 1.01 (s, 6H), 0.48–0.37 (m, 2H), –0.11 – –0.13 (m, 1H).

<sup>13</sup>C NMR (126 MHz, CDCl<sub>3</sub>) δ 124.5 (q, *J* = 280.4 Hz), 54.8, 49.1, 48.0 (q, *J* = 33.9 Hz), 29.7, 27.5, 27.4, 26.8, 24.0, 19.9, 19.7, 15.4.

<sup>19</sup>F NMR (376 MHz, CDCl<sub>3</sub>) δ –69.49 (t, *J* = 8.9 Hz)

IR (neat) ν 3286 (br), 2941(w), 1429 (w), 1393 (w), 1369 (w), 1323 (m), 1274 (m), 1229 (w), 1141 (s), 1085 (w), 995 (m), 908 (w), 871 (w), 831 (w), 770 (w), 734 (m), 665 (m), 609 (m), 564 (m), 519 (w) cm<sup>-1</sup>.

TLC R<sub>f</sub> = 0.26 in 9:1 hexanes:EtOAc.

HRMS (ESI) *m/z*: [M + H]<sup>+</sup> Calcd for C<sub>14</sub>H<sub>27</sub>F<sub>3</sub>N<sub>2</sub>O<sub>2</sub>S 345.1818; Found 345.1815.

***N*-tert-butyl-*N*-chloro-*N'*-trifluoro)ethylsulfamide (1s) (3-(2,2-dimethylcyclopropyl)propan-1-yl)-*N'*-(2,2,2-trifluoro)ethylsulfamide (1s)**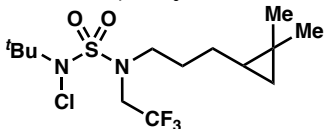

Prepared from sulfamide S8s (245 mg, 0.71 mmol) and TCICA (198 mg, 0.85 mmol) in CH<sub>2</sub>Cl<sub>2</sub> (4 mL) following general procedure G. The product was obtained as a colorless oil (220 mg, 82% yield) after silica gel column chromatography (Gradient: 100% hexanes → 20:1 hexanes/EtOAc).

<sup>1</sup>H NMR (400 MHz, CDCl<sub>3</sub>) δ 3.94 (q, *J* = 8.8 Hz, 2H), 3.45–3.40 (m, 2H), 1.82–1.75 (m, 2H), 1.50 (s, 9H), 1.38–1.25 (m, 2H), 1.03 (s, 6H), 0.50–0.38 (m, 2H), –0.09 – –0.11 (m, 1H).

<sup>13</sup>C NMR (126 MHz, CDCl<sub>3</sub>) δ 123.8 (q, *J* = 280.8 Hz), 67.7, 50.5 50.4 (q, *J* = 35.2 Hz), 28.9, 27.5, 27.4, 26.7, 23.9, 19.9, 19.7, 15.4.

<sup>19</sup>F NMR (376 MHz, CDCl<sub>3</sub>) δ –70.13 (t, *J* = 8.8 Hz).

IR (neat) ν 2941 (w), 1463 (w), 1400 (w), 1360 (m), 1313 (w), 1276 (m), 1233 (w), 1153 (s), 1109 (w), 1085 (w), 1026 (m), 1006 (m), 873 (m), 820 (m), 787 (w), 736 (w), 663 (m), 606 (m), 566 (m), 519 (w), 487 (m) cm<sup>-1</sup>.

TLC R<sub>f</sub> = 0.53 in 9:1 hexanes:EtOAc.

HRMS (ESI) *m/z*: [M + NH<sub>4</sub>]<sup>+</sup> Calcd for C<sub>14</sub>H<sub>26</sub>ClF<sub>3</sub>N<sub>2</sub>O<sub>2</sub>S•NH<sub>4</sub> 396.1699; Found 397.1701.

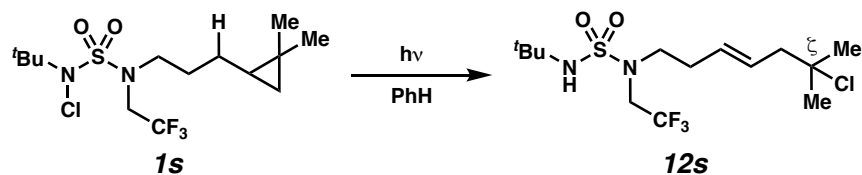

In order to determine the yield of the ring-opened isomers, duplicate reactions of chlorosulfamide **1s** (10 mg, 0.027 mmol) were subjected to general procedure I. After irradiating for 15 minutes, each sample was concentrated under reduced pressure and 2-bromo-5-(trifluoromethyl)pyridine (0.03 mmol, 1.11 equiv) was added as an internal standard.  $^{19}\text{F}$  NMR analysis of the crude reaction mixtures revealed an 80% yield of  $\zeta$ -chlorinated ring-opened isomer **12s** as an average of 2 runs.

Sample 1: 78% yield **12s**

Sample 2: 82% **12s**

***N*-tert-butyl-*N'*-(6-chloro-6-methylhept-3-en-1-yl)-*N'*-(2,2,2-trifluoroethyl)sulfamide (**12s**)**

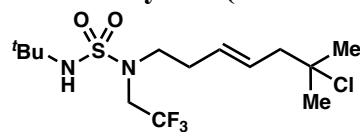

Chlorosulfamide **1s** (76 mg, 0.2 mmol) was subjected to general procedure I. After irradiating for 15 minutes, product **12s** was isolated for characterization by silica gel column chromatography (Gradient: 100% hexanes  $\rightarrow$  4:1 hexanes:Et<sub>2</sub>O).

$^1\text{H}$  NMR (400 MHz, CDCl<sub>3</sub>)  $\delta$  5.66 (ddd,  $J = 14.4, 7.5, 7.5$  Hz, 1H), 5.47 (dt,  $J = 14.4, 7.2, 7.2$  Hz, 1H), 4.02 (br s, 1H), 3.83 (q,  $J = 8.8$  Hz, 2H), 3.25 (dd,  $J = 7.4$  Hz, 2H), 2.45–2.40 (m, 4H), 1.54 (s, 6H), 1.34 (s, 9H).

$^{13}\text{C}$  NMR (126 MHz, CDCl<sub>3</sub>)  $\delta$  130.0, 128.5, 124.4 (q,  $J = 281.5$  Hz), 69.8, 54.9, 48.9, 48.9, 48.3 (q,  $J = 34.3$  Hz), 32.1, 30.7, 29.7.

$^{19}\text{F}$  NMR (376 MHz, CDCl<sub>3</sub>)  $\delta$  -69.48 (t,  $J = 9.0$  Hz).

IR (neat)  $\nu$  3290 (br), 2974 (w), 1426 (w), 1393 (w), 1370 (w), 1324 (m), 1273 (m), 1232 (w), 1141 (s), 1085 (m), 1040 (m), 975 (m), 907 (w), 871 (w), 833 (w), 767 (w), 738 (w), 665 (m), 609 (w), 568 (m), 520 (w), 406 (w) cm<sup>-1</sup>.

TLC  $R_f = 0.41$  in 4:1 hexanes:EtOAc.

HRMS (ESI)  $m/z$ :  $[\text{M} + \text{H}]^+$  Calcd for C<sub>14</sub>H<sub>26</sub>ClF<sub>3</sub>N<sub>2</sub>O<sub>2</sub>S 379.1430; Found 379.14284.

## XII. Description of quantum yield experiments.

### Determination of Light Intensity.

The light intensity was measured to determine the photon flux of the fluorimeter.<sup>20</sup> All solutions were stored in the dark and used the same day as prepared. Manipulations were performed in the dark and care was taken such that samples were protected from ambient light.

#### *Preparation of stock solutions.*

A 0.15 M solution of ferrioxalate was prepared by dissolving potassium ferrioxalate trihydrate ( $K_3[Fe(C_2O_4)_3] \cdot 3H_2O$ , 1.84 g, 3.75 mmol) in 0.05 M  $H_2SO_4$  and diluting to 25 mL total volume with 0.05 M  $H_2SO_4$  in a 25 mL volumetric flask.

A buffered 1,10-phenanthroline solution was prepared by dissolving phenanthroline (50 mg, 0.277 mmol) and sodium acetate (11.25 g) in 0.5 M  $H_2SO_4$  and diluting to 50 mL total volume with 0.5 M  $H_2SO_4$  in a 50 mL volumetric flask.

#### *Determination of background $Fe^{2+}$ concentration.*

2.00 mL of the ferrioxalate solution was added to a quartz cuvette. Next 0.35 mL of the phenanthroline solution was added and the mixture was stored in the dark for 1 h. The UV-vis spectrum was subsequently obtained and the absorbance value recorded at 510 nm. The process was repeated 2 additional times for 3 total trials.

Trial 1: 0.2440203428

Trial 2: 0.2468722761

Trial 3: 0.1206529737

Average: 0.2038485309

#### *Determination of photon flux.*

2.00 mL of the ferrioxalate solution was added to a quartz cuvette. The cuvette was immediately irradiated with ultraviolet light ( $313 \text{ nm} \pm 5 \text{ nm}$ ) in a fluorimeter for 90 seconds. The cuvette was then removed from the fluorimeter and 0.35 mL of the phenanthroline solution was added to the ferrioxalate solution. The resulting solution was stored in the dark for 1 h and the UV-vis spectrum was obtained. The absorbance value at 510 nm was recorded and the process was repeated 2 additional times for 3 total trials.

Trial 1: 1.293553352

Trial 2: 1.417163253

Trial 3: 1.422570229

Average: 1.377762278

#### *Calculations.*

The amount of  $Fe^{2+}$  formed after irradiation was calculated according to the Beer-Lambert law:

$$\text{mol } Fe(II) = \frac{V \cdot \Delta A}{l \cdot \epsilon}$$

where  $V$  is the volume of the sample analyzed (2.35 mL),  $\Delta A$  is the difference in average absorbances (between the irradiated and unirradiated ferrioxalate solutions) at 510 nm,  $l$  is the path length of the cuvette, and  $\epsilon$  is the molar absorptivity at 510 nm.

$$\text{mol Fe(II)} = \frac{(0.00235 \text{ L}) \cdot (1.173913747)}{(1.00 \text{ cm}) \cdot \left(11,100 \frac{\text{L}}{\text{mol} \cdot \text{cm}}\right)} = 2.48531 \cdot 10^{-7} \text{ mol}$$

The fraction of light absorbed by the ferrioxalate actinometer was calculated by the following equation:

$$f = 1 - 10^{-A}$$

where  $A$  is the absorbance at 313 nm of the ferrioxalate actinometer solution prior to irradiation and addition of phenanthroline.

$$f = 1 - 10^{-10} = 0.999 \approx 1.000$$

The photon flux was calculated using the following equation:

$$\text{photon flux} = \frac{\text{mol Fe(II)}}{\phi \cdot t \cdot f}$$

where  $\phi$  is the quantum yield of the ferrioxalate actinometer at 313 nm,<sup>21</sup>  $t$  is the time and  $f$  is the fraction of light absorbed by the ferrioxalate actinometer solution.

$$\text{photon flux} = \frac{2.48531 \cdot 10^{-7} \text{ mol}}{(1.24 \text{ einstein}^{-1}) \cdot (90 \text{ s}) \cdot (1.000)} = 2.22698 \cdot 10^{-9} \text{ einstein} \cdot \text{s}^{-1}$$

### Determination of quantum yield.

In a nitrogen-filled glovebox, a quartz cuvette was charged with sulfamide **1h** (42.7 mg, 0.10 mmol, 1 equiv) and PhH (2.5 mL, 0.04 M). The cuvette was fitted with a Teflon cap and sealed with parafilm. The vial was then placed in a fluorimeter and irradiated with ultraviolet light (313 nm  $\pm$  5 nm) for 60 minutes. After 60 minutes, the vial was removed from the fluorimeter and the reaction mixture was transferred to a scintillation vial and concentrated under reduced pressure. The residue was purified as detailed above to provide the desired product (25.7 mg, 60% yield, 0.064 mmol). A duplicate experiment afforded 24.0 mg of the desired product (56% yield). The quantum yield was calculated as an average of the two runs.

The minimum quantum yield ( $\phi$ ) was calculated using the following equation:

$$\phi = \frac{\text{mol product}}{\text{flux} \cdot t \cdot f}$$

Where  $t$  is the reaction time and  $f$  is the fraction of light absorbed by sulfamide **1h**.

$$\phi = \frac{0.000058 \text{ mol}}{(2.22698 \cdot 10^{-9} \text{ einstein} \cdot \text{s}^{-1}) \cdot (3600 \text{ s}) \cdot (1.000)} = 7.25$$

### XIII. UV-Vis Spectra.

*N*-*tert*-Butoxycarbonyl-*N'*-*tert*-butyl-*N'*-chloro-*N*-(3,7-dimethyloct-1-yl)sulfamide **1h** in PhH (0.04 M).

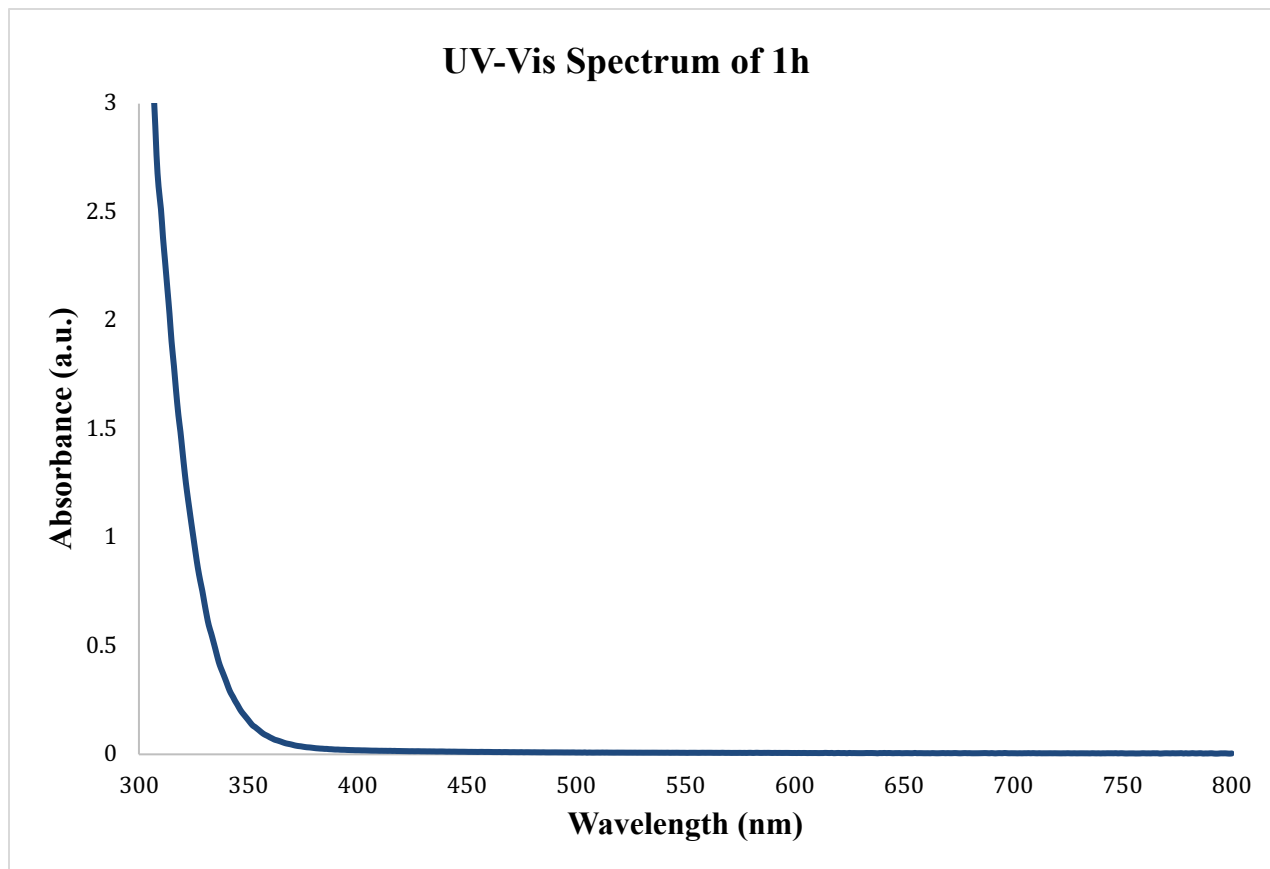

Absorbance at 313 nm: 2.142662287

Fraction of light absorbed at 313 nm: 0.99279991



*N*-*tert*-Butoxycarbonyl-*N'*-*tert*-butyl-*N*-(3-chloro-3,7-dimethyloct-1-yl)sulfamide **4h** in PhH (0.04 M).

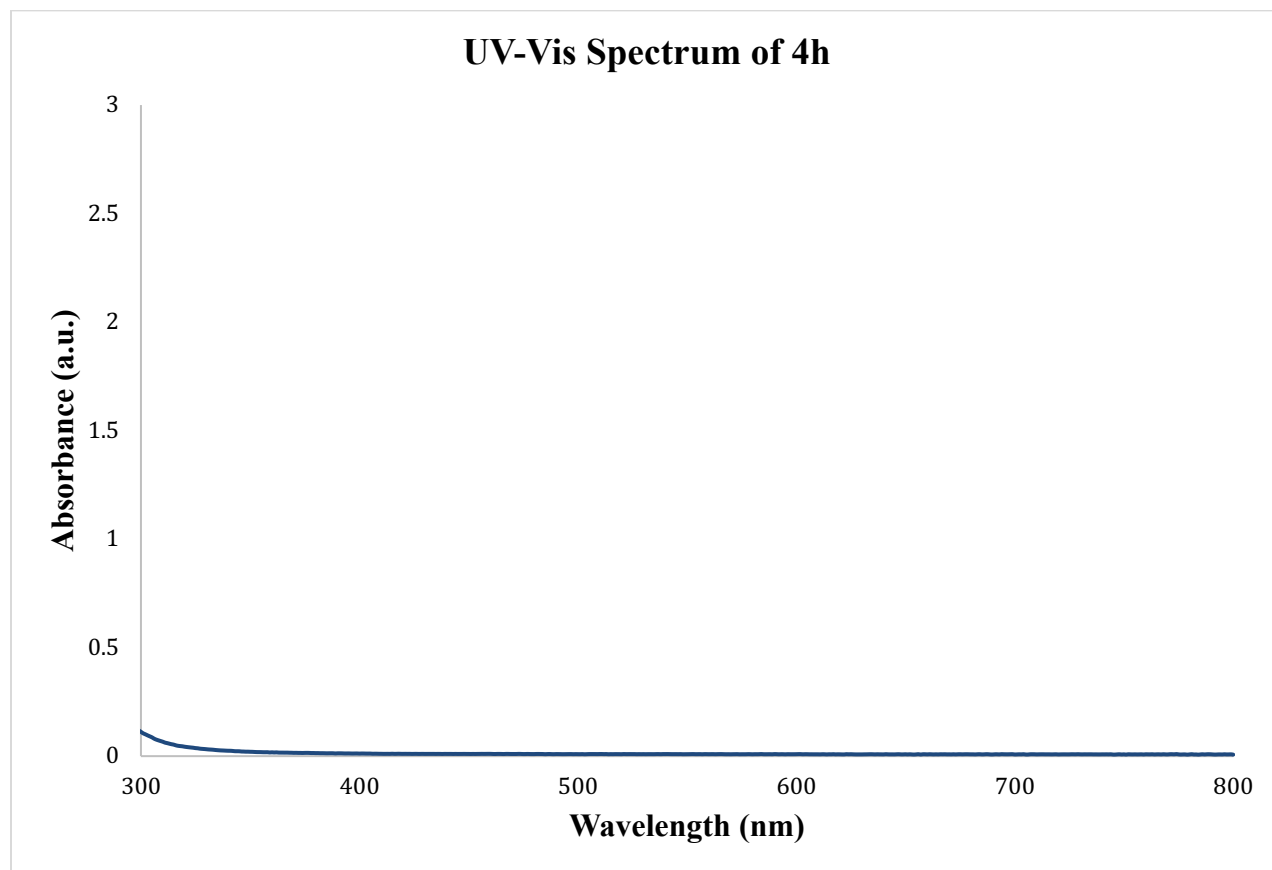

Absorbance at 313 nm: 0.05732247606

Fraction of light absorbed at 313 nm: 0.12365014

## XIV. S–N bond lengths in related sulfamides

| Structure                                                                                       | S–N(1) [Å]  | S–N(2) [Å]  | N(2)–S–N(1) ° | Reference                                                                                                                                                                                                                                         |
|-------------------------------------------------------------------------------------------------|-------------|-------------|---------------|---------------------------------------------------------------------------------------------------------------------------------------------------------------------------------------------------------------------------------------------------|
| $((\text{Cl}(\text{CH}_2)_2\text{N})\text{SO}_2\text{N}((\text{CH}_2)_2\text{Cl})\text{Boc})_2$ | 1.6875 (10) | 1.6147 (11) | 108.16 (5)    | A.Seridi, H.Akkari, J.-Y. Winum, P.Benard-Rocherulle, M.Abdaoui, <i>Acta Crystallographica Section E: Structure Reports Online</i> , 2009, 65, o2543, DOI: <a href="https://doi.org/10.1107/S1600536809038185">10.1107/S1600536809038185</a>      |
|                                                                                                 | 1.602(2)    | 1.689(2)    | 105.51(9)     | Jorge Vargas-Caporali, Arie van der Lee, Georges Dewynter, Eusebio Juaristi, <i>Letters in Organic Chemistry</i> , 2018, 15, 352, DOI: <a href="https://doi.org/10.2174/1570178615666180110162202">10.2174/1570178615666180110162202</a>          |
|                                                                                                 | 1.589 (3)   | 1.661 (3)   | 108.9 (1)     | Chafika Bougheloum, Carole Barbey, Malika Berredjem, Abdelrani Messalhi, Nathalie Dupont, <i>Journal of Molecular Structure</i> , 2013, 1041, 6, DOI: <a href="https://doi.org/10.1016/j.molstruc.2013.02.018">10.1016/j.molstruc.2013.02.018</a> |
| $(\text{tBuNH})_2\text{SO}_2$                                                                   | 1.615       | 1.616       | 110.8 (1)     | J.L.Atwood, A.H.Cowley, W.E.Hunter, S.K.Mehrotra, <i>Inorganic Chemistry</i> , 1982, 21, 435, DOI: <a href="https://doi.org/10.1021/ic00131a081">10.1021/ic00131a081</a>                                                                          |
| $((\text{Me}_2\text{CHCH}_2)\text{NH})_2\text{SO}_2$                                            | 1.615 (5)   | 1.615 (5)   | 111.5 (3)     | Bing Gong, Zhong Zheng, E.Skrzypczak-Jankun, Yinfa Yan, Jianhua Zhang, <i>Journal of the American Chemical Society</i> , 1998, 120, 1119, DOI: <a href="https://doi.org/10.1021/ja981707c">10.1021/ja981707c</a>                                  |

Supporting Information for Sulfamides Direct Radical-Mediated Chlorination

|                                                                         |             |             |             |                                                                                                                                                                                                                 |
|-------------------------------------------------------------------------|-------------|-------------|-------------|-----------------------------------------------------------------------------------------------------------------------------------------------------------------------------------------------------------------|
| $((\text{PhCH}_2)\text{NH})_2\text{SO}_2$                               | 1.602 (2)   | 1.616 (2)   | 112.06 (13) | DOI: <a href="https://doi.org/10.1021/ja981707c">10.1021/ja981707c</a>                                                                                                                                          |
| $((\text{H}_2\text{NCOCH}_2\text{CH}_2)\text{NH})_2\text{SO}_2$         | 1.612 (2)   | 1.612 (2)   | 111.79 (12) | DOI: <a href="https://doi.org/10.1021/ja981707c">10.1021/ja981707c</a>                                                                                                                                          |
| $((\text{CH}_3\text{OC}_6\text{H}_4\text{CH}_2)\text{NH})_2\text{SO}_2$ | 1.615 (5)   | 1.618 (8)   | 112.9 (3)   | DOI: <a href="https://doi.org/10.1021/ja981707c">10.1021/ja981707c</a>                                                                                                                                          |
| $((\text{PhCH}(\text{CH}_3))\text{NH})_2\text{SO}_2$                    | 1.608 (2)   | 1.609 (2)   | 112.16 (12) | DOI: <a href="https://doi.org/10.1021/ja981707c">10.1021/ja981707c</a>                                                                                                                                          |
| $(\text{CyNH})_2\text{SO}_2$                                            | 1.6062(13)  | 1.6062(13)  | 102.33(11)  | M.B.Hursthouse,<br>T.Gelbrich,<br>N.Bricklebank CCDC<br>223234: Experimental<br>Crystal Structure<br>Determination, 2014,<br>DOI: <a href="https://doi.org/10.5517/cc7h933">10.5517/cc7h933</a>                 |
| $((\text{H}_2\text{NCO}(\text{CH}_2)_3)\text{NH})_2\text{SO}_2$         | 1.618 (2)   | 1.618 (2)   | 111.8 (2)   | Bing Gong, Chong<br>Zheng, Jianhua<br>Zhang, <i>Journal of<br/>Chemical<br/>Crystallography</i> , 1999, 2<br>9, 645,<br>DOI: <a href="https://doi.org/10.1023/A:1009569417467">10.1023/A:100956<br/>9417467</a> |
| $((^i\text{PrCH}_2\text{CH}_2)\text{NH})_2\text{SO}_2$                  | 1.617 (5)   | 1.586 (6)   | 110.7 (3)   | Bing Gong, Chong<br>Zheng, E.Skrzypczak-<br>Jankun, Jin Zhu, <i>Organic<br/>Letters</i> , 2000, 2, 3273,<br>DOI: <a href="https://doi.org/10.1021/ol006343j">10.1021/ol006343j</a>                              |
| $((\text{CyCH}_2)\text{NH})_2\text{SO}_2$                               | 1.591 (12)  | 1.624 (12)  | 110.5 (10)  | DOI: <a href="https://doi.org/10.1021/ol006343j">10.1021/ol006343j</a>                                                                                                                                          |
| $((\text{CH}_3(\text{CH}_2)_4)\text{NH})_2\text{SO}_2$                  | 1.614 (2)   | 1.614 (2)   | 111.47 (18) | DOI: <a href="https://doi.org/10.1021/ol006343j">10.1021/ol006343j</a>                                                                                                                                          |
| $((\text{CH}_3(\text{CH}_2)_5)\text{NH})_2\text{SO}_2$                  | 1.623 (3)   | 1.623 (3)   | 110.5 (2)   | DOI: <a href="https://doi.org/10.1021/ol006343j">10.1021/ol006343j</a>                                                                                                                                          |
| $((\text{CH}_3(\text{CH}_2)_7)\text{NH})_2\text{SO}_2$                  | 1.6235 (12) | 1.6235 (12) | 111.97 (9)  | DOI: <a href="https://doi.org/10.1021/ol006343j">10.1021/ol006343j</a>                                                                                                                                          |

## XV. Computational Calculations

## Computational Methods

Density functional theory (DFT) calculations were performed using Gaussian 09<sup>22</sup> (revision D.01)<sup>23</sup> or Gaussian 16 (revision B.01).<sup>24</sup> GaussView<sup>25</sup> was used to generate input geometries and visualize output. Geometry minimizations and frequency calculations for 1,6- and 1,7-HAT pathways were initially performed using the uB3LYP<sup>26</sup> functional and the 6-31+G(d,p) basis set<sup>27</sup> with inspiration from related calculations by Leonori and co-workers.<sup>28</sup> The calculations were performed using the polarizable continuum model (PCM) to account for solvation effects in benzene and an ultrafine (99,590) integration grid to limit errors associated with low-frequency vibrational modes.<sup>29</sup> These calculations were performed without any corrections for quantum tunneling.

**Table S2.** Investigations comparing experimental product ratios to computationally-calculated differences in transition state energies for 1,6- vs 1,7-HAT pathways.

| entry | parent compound                                                                     | experimental $\Delta\Delta G^\ddagger$ (kcal·mol <sup>-1</sup> ) <sup>[a]</sup> | calculated $\Delta\Delta G^\ddagger$ (kcal·mol <sup>-1</sup> ) <sup>[b]</sup><br>uB3LYP / 6-32+G(d,p) |                                         |                                             |
|-------|-------------------------------------------------------------------------------------|---------------------------------------------------------------------------------|-------------------------------------------------------------------------------------------------------|-----------------------------------------|---------------------------------------------|
|       |                                                                                     |                                                                                 | RRHO Approximation                                                                                    | Quasi-RRHO Approximation <sup>[c]</sup> | Quasi-Harmonic Approximation <sup>[d]</sup> |
| 1     | 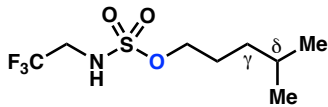  | -0.82                                                                           | -3.33                                                                                                 | -2.94                                   | -2.76                                       |
| 2     |  | -0.69                                                                           | -1.09                                                                                                 | -0.63                                   | -0.55                                       |
| 3     |  | ≤ -1.77                                                                         | -3.74                                                                                                 | -3.21                                   | -2.90                                       |
| 4     |  | -1.56                                                                           | -2.98                                                                                                 | -2.66                                   | -2.48                                       |
| 5     |  | -1.39                                                                           | -2.06                                                                                                 | -1.77                                   | -1.65                                       |
| 6     |  | -1.52                                                                           | +0.35                                                                                                 | +0.84                                   | +0.87                                       |
| 7     |  | -0.41                                                                           | +2.24                                                                                                 | +2.59                                   | +2.58                                       |
| 8     |  | +0.38                                                                           | +1.04                                                                                                 | +1.42                                   | +1.49                                       |

<sup>a</sup>  $\Delta\Delta G^\ddagger = -RT \ln(\gamma\text{-chlorinated product} / \delta\text{-chlorinated product})$  as determined by <sup>1</sup>H NMR of crude reaction mixture. <sup>b</sup>  $\Delta\Delta G^\ddagger = (\Delta G(1,6\text{-HAT TS}) - \Delta G(1,7\text{-HAT TS}))$  as determined from the

calculated Gibbs free energies using the functional/basis set combination reported at the top of each column. [c] Corrected using the quasi-RRHO approximation of Grimme.<sup>30</sup> [d] Corrected using the quasi-harmonic approximation of Cramer and Truhlar.<sup>31</sup>

The computed energies of the transition states were found to be highly dependent upon the molecule's orientation,<sup>29</sup> which we expect leads, at least in part, to the discrepancies in both qualitative and quantitative trends between the experimental and calculated values. These discrepancies appear to be most drastic for sulfamide substrates where there is a significant difference in BDE of the hydrogen atoms being engaged by the associated 1,6- and 1,7-HAT processes (entries 6–8). The observed trends hold even when quasi-harmonic corrections have been applied.<sup>30,31</sup> These corrections should limit error associated with contributions with the sensitive entropic component of small vibrational frequencies.

The calculations were evaluated for spin contamination by comparing the value of total spin ( $S^*2$ ) at the optimized energy to  $s(s+1)$  for the system ( $s = \frac{1}{2}$  times the number of unpaired electrons). The aforementioned calculations did not appear to suffer from any significant spin contamination using this approach.

**Table S3. Computed Energies**

DFT Method: uB3LYP / 6-31+G(d,p) / PCM – benzene [values in Hartrees]

| entry | species | total electronic energy | sum of electronic and zero-point energies | sum of electronic and thermal enthalpies | Gibbs free energy |
|-------|---------|-------------------------|-------------------------------------------|------------------------------------------|-------------------|
| 1     |         | -1291.971313            | -1291.731514                              | -1291.712045                             | -1291.782881      |
| 2     |         | -1291.949419            | -1291.713544                              | -1291.695571                             | -1291.760012      |
| 3     |         | -1291.944541            | -1291.708985                              | -1291.690935                             | -1291.754709      |
| 4     |         | -1291.976256            | -1291.737506                              | -1291.717239                             | -1291.791126      |
| 5     |         | -1291.976256            | -1291.737506                              | -1291.717239                             | -1291.791126      |
| 6     |         | -1072.872454            | -1072.553343                              | -1072.533194                             | -1072.603021      |
| 7     |         | -1072.843678            | -1072.528804                              | -1072.510182                             | -1072.573582      |
| 8     |         | -1072.842968            | -1072.528043                              | -1072.509493                             | -1072.571838      |
| 9     |         | -1072.870243            | -1072.552259                              | -1072.531837                             | -1072.603126      |
| 10    |         | -1072.875201            | -1072.557278                              | -1072.536536                             | -1072.608835      |
| 11    |         | -1429.370182            | -1429.005472                              | -1428.980228                             | -1429.063409      |

Supporting Information for Sulfamides Direct Radical-Mediated Chlorination

|    |  |              |              |              |              |
|----|--|--------------|--------------|--------------|--------------|
| 12 |  | -1429.340594 | -1428.98022  | -1428.956321 | -1429.03403  |
| 13 |  | -1429.33668  | -1428.975845 | -1428.952239 | -1429.028074 |
| 14 |  | -1429.367828 | -1429.004451 | -1428.978892 | -1429.063585 |
| 15 |  | -1429.368048 | -1429.004394 | -1428.978925 | -1429.06269  |
|    |  |              |              |              |              |
| 16 |  | -1398.851453 | -1398.393464 | -1398.3647   | -1398.4541   |
| 17 |  | -1398.819166 | -1398.365841 | -1398.338331 | -1398.423107 |
| 18 |  | -1398.815491 | -1398.361922 | -1398.334535 | -1398.418357 |
| 19 |  | -1398.843427 | -1398.386613 | -1398.357576 | -1398.44844  |
| 20 |  | -1398.84364  | -1398.386767 | -1398.357735 | -1398.447839 |
|    |  |              |              |              |              |
| 21 |  | -1617.952624 | -1617.637302 | -1617.545982 | -1617.637302 |

Supporting Information for Sulfamides Direct Radical-Mediated Chlorination

|    |  |              |              |              |              |
|----|--|--------------|--------------|--------------|--------------|
| 22 |  | -1617.924212 | -1617.549869 | -1617.522918 | -1617.60877  |
| 23 |  | -1617.922067 | -1617.54754  | -1617.520787 | -1617.605488 |
| 24 |  | -1617.951581 | -1617.573757 | -1617.545288 | -1617.637108 |
| 25 |  | -1617.951698 | -1617.573934 | -1617.545422 | -1617.637009 |
|    |  |              |              |              |              |
| 26 |  | -1429.369513 | -1429.005144 | -1428.979957 | -1429.062929 |
| 27 |  | -1429.334723 | -1428.974624 | -1428.950768 | -1429.027491 |
| 28 |  | -1429.337386 | -1428.976563 | -1428.953032 | -1429.028051 |
| 29 |  | -1429.367669 | -1429.004146 | -1428.978771 | -1429.06217  |
| 30 |  | -1429.37336  | -1429.010181 | -1428.984453 | -1429.06929  |
|    |  |              |              |              |              |
| 31 |  | -1398.846083 | -1398.38882  | -1398.360001 | -1398.44937  |



Supporting Information for Sulfamides Direct Radical-Mediated Chlorination

|    |  |              |              |              |              |
|----|--|--------------|--------------|--------------|--------------|
| 32 |  | -1398.811272 | -1398.358247 | -1398.330722 | -1398.414987 |
| 33 |  | -1398.8158   | -1398.362738 | -1398.335325 | -1398.418555 |
| 34 |  | -1398.847203 | -1398.390511 | -1398.361581 | -1398.451464 |
| 35 |  | -1398.851937 | -1398.395599 | -1398.366286 | -1398.457894 |
| 36 |  | -1617.951968 | -1617.573883 | -1617.545747 | -1617.636694 |
| 37 |  | -1617.918224 | -1617.544275 | -1617.517293 | -1617.602441 |
| 38 |  | -1617.920971 | -1617.547026 | -1617.520237 | -1617.604101 |
| 39 |  | -1617.951346 | -1617.573249 | -1617.545000 | -1617.635358 |
| 40 |  | -1617.956073 | -1617.578672 | -1617.549928 | -1617.642636 |

**Table S4. Optimized Structures and Cartesian Coordinates**

DFT Method: uB3LYP / 6-31+G(d,p) / PCM – benzene

| entry                                                                                                                                                                                                                                                                                                                                                                                                                                                                                                                                                                                                                                                                                                                                                                                                                                                                                                                                                                                                                                                                                                                                                                                                                                                                                                                                                                                                                                                                                                                                                                                                                                                                                                                                                                                                                                                                                                                                                                                                                                                                                                                                                                                                                                                                                                                                                                                                                                                                                                                                                      | species                                                                           | minimized structure                                                                |           |                         |  |  |   |   |   |       |  |  |  |   |           |          |          |   |          |          |          |   |          |           |           |   |          |           |           |   |          |           |          |   |          |          |           |   |          |          |          |   |          |          |          |   |          |          |           |   |          |          |           |   |          |          |           |   |          |          |           |   |          |          |           |   |          |          |           |   |          |          |           |   |          |          |           |   |          |          |           |   |          |          |           |   |          |          |           |   |          |          |           |   |          |          |           |   |          |          |           |   |          |          |           |   |          |          |           |   |           |           |          |   |           |           |          |   |           |           |          |   |           |           |          |   |           |          |          |   |           |          |          |   |          |          |           |
|------------------------------------------------------------------------------------------------------------------------------------------------------------------------------------------------------------------------------------------------------------------------------------------------------------------------------------------------------------------------------------------------------------------------------------------------------------------------------------------------------------------------------------------------------------------------------------------------------------------------------------------------------------------------------------------------------------------------------------------------------------------------------------------------------------------------------------------------------------------------------------------------------------------------------------------------------------------------------------------------------------------------------------------------------------------------------------------------------------------------------------------------------------------------------------------------------------------------------------------------------------------------------------------------------------------------------------------------------------------------------------------------------------------------------------------------------------------------------------------------------------------------------------------------------------------------------------------------------------------------------------------------------------------------------------------------------------------------------------------------------------------------------------------------------------------------------------------------------------------------------------------------------------------------------------------------------------------------------------------------------------------------------------------------------------------------------------------------------------------------------------------------------------------------------------------------------------------------------------------------------------------------------------------------------------------------------------------------------------------------------------------------------------------------------------------------------------------------------------------------------------------------------------------------------------|-----------------------------------------------------------------------------------|------------------------------------------------------------------------------------|-----------|-------------------------|--|--|---|---|---|-------|--|--|--|---|-----------|----------|----------|---|----------|----------|----------|---|----------|-----------|-----------|---|----------|-----------|-----------|---|----------|-----------|----------|---|----------|----------|-----------|---|----------|----------|----------|---|----------|----------|----------|---|----------|----------|-----------|---|----------|----------|-----------|---|----------|----------|-----------|---|----------|----------|-----------|---|----------|----------|-----------|---|----------|----------|-----------|---|----------|----------|-----------|---|----------|----------|-----------|---|----------|----------|-----------|---|----------|----------|-----------|---|----------|----------|-----------|---|----------|----------|-----------|---|----------|----------|-----------|---|----------|----------|-----------|---|----------|----------|-----------|---|----------|----------|-----------|---|-----------|-----------|----------|---|-----------|-----------|----------|---|-----------|-----------|----------|---|-----------|-----------|----------|---|-----------|----------|----------|---|-----------|----------|----------|---|----------|----------|-----------|
| 1                                                                                                                                                                                                                                                                                                                                                                                                                                                                                                                                                                                                                                                                                                                                                                                                                                                                                                                                                                                                                                                                                                                                                                                                                                                                                                                                                                                                                                                                                                                                                                                                                                                                                                                                                                                                                                                                                                                                                                                                                                                                                                                                                                                                                                                                                                                                                                                                                                                                                                                                                          | 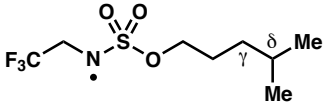 |  |           |                         |  |  |   |   |   |       |  |  |  |   |           |          |          |   |          |          |          |   |          |           |           |   |          |           |           |   |          |           |          |   |          |          |           |   |          |          |          |   |          |          |          |   |          |          |           |   |          |          |           |   |          |          |           |   |          |          |           |   |          |          |           |   |          |          |           |   |          |          |           |   |          |          |           |   |          |          |           |   |          |          |           |   |          |          |           |   |          |          |           |   |          |          |           |   |          |          |           |   |          |          |           |   |          |          |           |   |           |           |          |   |           |           |          |   |           |           |          |   |           |           |          |   |           |          |          |   |           |          |          |   |          |          |           |
| <table border="1"> <thead> <tr> <th rowspan="2">Atom</th> <th colspan="3">Coordinates (Angstroms)</th> </tr> <tr> <th>X</th> <th>Y</th> <th>Z</th> </tr> </thead> <tbody> <tr><td colspan="4">-----</td></tr> <tr><td>C</td><td>-1.855462</td><td>0.388382</td><td>1.932594</td></tr> <tr><td>N</td><td>0.143206</td><td>0.554160</td><td>0.570399</td></tr> <tr><td>S</td><td>1.489731</td><td>-0.192827</td><td>-0.146221</td></tr> <tr><td>O</td><td>1.068573</td><td>-1.299588</td><td>-0.994717</td></tr> <tr><td>O</td><td>2.462688</td><td>-0.388756</td><td>0.930078</td></tr> <tr><td>C</td><td>2.551585</td><td>2.194799</td><td>-0.560902</td></tr> <tr><td>H</td><td>1.789436</td><td>2.666323</td><td>0.065988</td></tr> <tr><td>H</td><td>3.407110</td><td>1.902172</td><td>0.052157</td></tr> <tr><td>C</td><td>2.953620</td><td>3.075539</td><td>-1.730314</td></tr> <tr><td>H</td><td>3.677286</td><td>2.534432</td><td>-2.352049</td></tr> <tr><td>H</td><td>2.069549</td><td>3.264569</td><td>-2.347785</td></tr> <tr><td>C</td><td>3.567251</td><td>4.396183</td><td>-1.237146</td></tr> <tr><td>H</td><td>2.819289</td><td>4.954066</td><td>-0.654812</td></tr> <tr><td>H</td><td>4.390742</td><td>4.169824</td><td>-0.545865</td></tr> <tr><td>C</td><td>4.109202</td><td>5.308812</td><td>-2.356760</td></tr> <tr><td>H</td><td>4.836120</td><td>4.722619</td><td>-2.939105</td></tr> <tr><td>C</td><td>4.852620</td><td>6.508894</td><td>-1.749531</td></tr> <tr><td>H</td><td>5.669064</td><td>6.184568</td><td>-1.094295</td></tr> <tr><td>H</td><td>5.282021</td><td>7.143877</td><td>-2.532280</td></tr> <tr><td>H</td><td>4.171626</td><td>7.130116</td><td>-1.153915</td></tr> <tr><td>C</td><td>3.006803</td><td>5.784994</td><td>-3.316180</td></tr> <tr><td>H</td><td>2.514454</td><td>4.952946</td><td>-3.829549</td></tr> <tr><td>H</td><td>2.236811</td><td>6.349529</td><td>-2.774525</td></tr> <tr><td>H</td><td>3.421847</td><td>6.445012</td><td>-4.085905</td></tr> <tr><td>C</td><td>-0.701970</td><td>-0.369002</td><td>1.288346</td></tr> <tr><td>H</td><td>-0.146307</td><td>-0.892963</td><td>2.079948</td></tr> <tr><td>H</td><td>-1.116685</td><td>-1.135518</td><td>0.618265</td></tr> <tr><td>F</td><td>-2.652298</td><td>-0.477821</td><td>2.603207</td></tr> <tr><td>F</td><td>-1.424322</td><td>1.314893</td><td>2.815886</td></tr> <tr><td>F</td><td>-2.619137</td><td>1.022806</td><td>1.017350</td></tr> <tr><td>O</td><td>1.964641</td><td>0.966874</td><td>-1.136087</td></tr> </tbody> </table> |                                                                                   |                                                                                    | Atom      | Coordinates (Angstroms) |  |  | X | Y | Z | ----- |  |  |  | C | -1.855462 | 0.388382 | 1.932594 | N | 0.143206 | 0.554160 | 0.570399 | S | 1.489731 | -0.192827 | -0.146221 | O | 1.068573 | -1.299588 | -0.994717 | O | 2.462688 | -0.388756 | 0.930078 | C | 2.551585 | 2.194799 | -0.560902 | H | 1.789436 | 2.666323 | 0.065988 | H | 3.407110 | 1.902172 | 0.052157 | C | 2.953620 | 3.075539 | -1.730314 | H | 3.677286 | 2.534432 | -2.352049 | H | 2.069549 | 3.264569 | -2.347785 | C | 3.567251 | 4.396183 | -1.237146 | H | 2.819289 | 4.954066 | -0.654812 | H | 4.390742 | 4.169824 | -0.545865 | C | 4.109202 | 5.308812 | -2.356760 | H | 4.836120 | 4.722619 | -2.939105 | C | 4.852620 | 6.508894 | -1.749531 | H | 5.669064 | 6.184568 | -1.094295 | H | 5.282021 | 7.143877 | -2.532280 | H | 4.171626 | 7.130116 | -1.153915 | C | 3.006803 | 5.784994 | -3.316180 | H | 2.514454 | 4.952946 | -3.829549 | H | 2.236811 | 6.349529 | -2.774525 | H | 3.421847 | 6.445012 | -4.085905 | C | -0.701970 | -0.369002 | 1.288346 | H | -0.146307 | -0.892963 | 2.079948 | H | -1.116685 | -1.135518 | 0.618265 | F | -2.652298 | -0.477821 | 2.603207 | F | -1.424322 | 1.314893 | 2.815886 | F | -2.619137 | 1.022806 | 1.017350 | O | 1.964641 | 0.966874 | -1.136087 |
| Atom                                                                                                                                                                                                                                                                                                                                                                                                                                                                                                                                                                                                                                                                                                                                                                                                                                                                                                                                                                                                                                                                                                                                                                                                                                                                                                                                                                                                                                                                                                                                                                                                                                                                                                                                                                                                                                                                                                                                                                                                                                                                                                                                                                                                                                                                                                                                                                                                                                                                                                                                                       | Coordinates (Angstroms)                                                           |                                                                                    |           |                         |  |  |   |   |   |       |  |  |  |   |           |          |          |   |          |          |          |   |          |           |           |   |          |           |           |   |          |           |          |   |          |          |           |   |          |          |          |   |          |          |          |   |          |          |           |   |          |          |           |   |          |          |           |   |          |          |           |   |          |          |           |   |          |          |           |   |          |          |           |   |          |          |           |   |          |          |           |   |          |          |           |   |          |          |           |   |          |          |           |   |          |          |           |   |          |          |           |   |          |          |           |   |          |          |           |   |           |           |          |   |           |           |          |   |           |           |          |   |           |           |          |   |           |          |          |   |           |          |          |   |          |          |           |
|                                                                                                                                                                                                                                                                                                                                                                                                                                                                                                                                                                                                                                                                                                                                                                                                                                                                                                                                                                                                                                                                                                                                                                                                                                                                                                                                                                                                                                                                                                                                                                                                                                                                                                                                                                                                                                                                                                                                                                                                                                                                                                                                                                                                                                                                                                                                                                                                                                                                                                                                                            | X                                                                                 | Y                                                                                  | Z         |                         |  |  |   |   |   |       |  |  |  |   |           |          |          |   |          |          |          |   |          |           |           |   |          |           |           |   |          |           |          |   |          |          |           |   |          |          |          |   |          |          |          |   |          |          |           |   |          |          |           |   |          |          |           |   |          |          |           |   |          |          |           |   |          |          |           |   |          |          |           |   |          |          |           |   |          |          |           |   |          |          |           |   |          |          |           |   |          |          |           |   |          |          |           |   |          |          |           |   |          |          |           |   |          |          |           |   |           |           |          |   |           |           |          |   |           |           |          |   |           |           |          |   |           |          |          |   |           |          |          |   |          |          |           |
| -----                                                                                                                                                                                                                                                                                                                                                                                                                                                                                                                                                                                                                                                                                                                                                                                                                                                                                                                                                                                                                                                                                                                                                                                                                                                                                                                                                                                                                                                                                                                                                                                                                                                                                                                                                                                                                                                                                                                                                                                                                                                                                                                                                                                                                                                                                                                                                                                                                                                                                                                                                      |                                                                                   |                                                                                    |           |                         |  |  |   |   |   |       |  |  |  |   |           |          |          |   |          |          |          |   |          |           |           |   |          |           |           |   |          |           |          |   |          |          |           |   |          |          |          |   |          |          |          |   |          |          |           |   |          |          |           |   |          |          |           |   |          |          |           |   |          |          |           |   |          |          |           |   |          |          |           |   |          |          |           |   |          |          |           |   |          |          |           |   |          |          |           |   |          |          |           |   |          |          |           |   |          |          |           |   |          |          |           |   |          |          |           |   |           |           |          |   |           |           |          |   |           |           |          |   |           |           |          |   |           |          |          |   |           |          |          |   |          |          |           |
| C                                                                                                                                                                                                                                                                                                                                                                                                                                                                                                                                                                                                                                                                                                                                                                                                                                                                                                                                                                                                                                                                                                                                                                                                                                                                                                                                                                                                                                                                                                                                                                                                                                                                                                                                                                                                                                                                                                                                                                                                                                                                                                                                                                                                                                                                                                                                                                                                                                                                                                                                                          | -1.855462                                                                         | 0.388382                                                                           | 1.932594  |                         |  |  |   |   |   |       |  |  |  |   |           |          |          |   |          |          |          |   |          |           |           |   |          |           |           |   |          |           |          |   |          |          |           |   |          |          |          |   |          |          |          |   |          |          |           |   |          |          |           |   |          |          |           |   |          |          |           |   |          |          |           |   |          |          |           |   |          |          |           |   |          |          |           |   |          |          |           |   |          |          |           |   |          |          |           |   |          |          |           |   |          |          |           |   |          |          |           |   |          |          |           |   |          |          |           |   |           |           |          |   |           |           |          |   |           |           |          |   |           |           |          |   |           |          |          |   |           |          |          |   |          |          |           |
| N                                                                                                                                                                                                                                                                                                                                                                                                                                                                                                                                                                                                                                                                                                                                                                                                                                                                                                                                                                                                                                                                                                                                                                                                                                                                                                                                                                                                                                                                                                                                                                                                                                                                                                                                                                                                                                                                                                                                                                                                                                                                                                                                                                                                                                                                                                                                                                                                                                                                                                                                                          | 0.143206                                                                          | 0.554160                                                                           | 0.570399  |                         |  |  |   |   |   |       |  |  |  |   |           |          |          |   |          |          |          |   |          |           |           |   |          |           |           |   |          |           |          |   |          |          |           |   |          |          |          |   |          |          |          |   |          |          |           |   |          |          |           |   |          |          |           |   |          |          |           |   |          |          |           |   |          |          |           |   |          |          |           |   |          |          |           |   |          |          |           |   |          |          |           |   |          |          |           |   |          |          |           |   |          |          |           |   |          |          |           |   |          |          |           |   |          |          |           |   |           |           |          |   |           |           |          |   |           |           |          |   |           |           |          |   |           |          |          |   |           |          |          |   |          |          |           |
| S                                                                                                                                                                                                                                                                                                                                                                                                                                                                                                                                                                                                                                                                                                                                                                                                                                                                                                                                                                                                                                                                                                                                                                                                                                                                                                                                                                                                                                                                                                                                                                                                                                                                                                                                                                                                                                                                                                                                                                                                                                                                                                                                                                                                                                                                                                                                                                                                                                                                                                                                                          | 1.489731                                                                          | -0.192827                                                                          | -0.146221 |                         |  |  |   |   |   |       |  |  |  |   |           |          |          |   |          |          |          |   |          |           |           |   |          |           |           |   |          |           |          |   |          |          |           |   |          |          |          |   |          |          |          |   |          |          |           |   |          |          |           |   |          |          |           |   |          |          |           |   |          |          |           |   |          |          |           |   |          |          |           |   |          |          |           |   |          |          |           |   |          |          |           |   |          |          |           |   |          |          |           |   |          |          |           |   |          |          |           |   |          |          |           |   |          |          |           |   |           |           |          |   |           |           |          |   |           |           |          |   |           |           |          |   |           |          |          |   |           |          |          |   |          |          |           |
| O                                                                                                                                                                                                                                                                                                                                                                                                                                                                                                                                                                                                                                                                                                                                                                                                                                                                                                                                                                                                                                                                                                                                                                                                                                                                                                                                                                                                                                                                                                                                                                                                                                                                                                                                                                                                                                                                                                                                                                                                                                                                                                                                                                                                                                                                                                                                                                                                                                                                                                                                                          | 1.068573                                                                          | -1.299588                                                                          | -0.994717 |                         |  |  |   |   |   |       |  |  |  |   |           |          |          |   |          |          |          |   |          |           |           |   |          |           |           |   |          |           |          |   |          |          |           |   |          |          |          |   |          |          |          |   |          |          |           |   |          |          |           |   |          |          |           |   |          |          |           |   |          |          |           |   |          |          |           |   |          |          |           |   |          |          |           |   |          |          |           |   |          |          |           |   |          |          |           |   |          |          |           |   |          |          |           |   |          |          |           |   |          |          |           |   |          |          |           |   |           |           |          |   |           |           |          |   |           |           |          |   |           |           |          |   |           |          |          |   |           |          |          |   |          |          |           |
| O                                                                                                                                                                                                                                                                                                                                                                                                                                                                                                                                                                                                                                                                                                                                                                                                                                                                                                                                                                                                                                                                                                                                                                                                                                                                                                                                                                                                                                                                                                                                                                                                                                                                                                                                                                                                                                                                                                                                                                                                                                                                                                                                                                                                                                                                                                                                                                                                                                                                                                                                                          | 2.462688                                                                          | -0.388756                                                                          | 0.930078  |                         |  |  |   |   |   |       |  |  |  |   |           |          |          |   |          |          |          |   |          |           |           |   |          |           |           |   |          |           |          |   |          |          |           |   |          |          |          |   |          |          |          |   |          |          |           |   |          |          |           |   |          |          |           |   |          |          |           |   |          |          |           |   |          |          |           |   |          |          |           |   |          |          |           |   |          |          |           |   |          |          |           |   |          |          |           |   |          |          |           |   |          |          |           |   |          |          |           |   |          |          |           |   |          |          |           |   |           |           |          |   |           |           |          |   |           |           |          |   |           |           |          |   |           |          |          |   |           |          |          |   |          |          |           |
| C                                                                                                                                                                                                                                                                                                                                                                                                                                                                                                                                                                                                                                                                                                                                                                                                                                                                                                                                                                                                                                                                                                                                                                                                                                                                                                                                                                                                                                                                                                                                                                                                                                                                                                                                                                                                                                                                                                                                                                                                                                                                                                                                                                                                                                                                                                                                                                                                                                                                                                                                                          | 2.551585                                                                          | 2.194799                                                                           | -0.560902 |                         |  |  |   |   |   |       |  |  |  |   |           |          |          |   |          |          |          |   |          |           |           |   |          |           |           |   |          |           |          |   |          |          |           |   |          |          |          |   |          |          |          |   |          |          |           |   |          |          |           |   |          |          |           |   |          |          |           |   |          |          |           |   |          |          |           |   |          |          |           |   |          |          |           |   |          |          |           |   |          |          |           |   |          |          |           |   |          |          |           |   |          |          |           |   |          |          |           |   |          |          |           |   |          |          |           |   |           |           |          |   |           |           |          |   |           |           |          |   |           |           |          |   |           |          |          |   |           |          |          |   |          |          |           |
| H                                                                                                                                                                                                                                                                                                                                                                                                                                                                                                                                                                                                                                                                                                                                                                                                                                                                                                                                                                                                                                                                                                                                                                                                                                                                                                                                                                                                                                                                                                                                                                                                                                                                                                                                                                                                                                                                                                                                                                                                                                                                                                                                                                                                                                                                                                                                                                                                                                                                                                                                                          | 1.789436                                                                          | 2.666323                                                                           | 0.065988  |                         |  |  |   |   |   |       |  |  |  |   |           |          |          |   |          |          |          |   |          |           |           |   |          |           |           |   |          |           |          |   |          |          |           |   |          |          |          |   |          |          |          |   |          |          |           |   |          |          |           |   |          |          |           |   |          |          |           |   |          |          |           |   |          |          |           |   |          |          |           |   |          |          |           |   |          |          |           |   |          |          |           |   |          |          |           |   |          |          |           |   |          |          |           |   |          |          |           |   |          |          |           |   |          |          |           |   |           |           |          |   |           |           |          |   |           |           |          |   |           |           |          |   |           |          |          |   |           |          |          |   |          |          |           |
| H                                                                                                                                                                                                                                                                                                                                                                                                                                                                                                                                                                                                                                                                                                                                                                                                                                                                                                                                                                                                                                                                                                                                                                                                                                                                                                                                                                                                                                                                                                                                                                                                                                                                                                                                                                                                                                                                                                                                                                                                                                                                                                                                                                                                                                                                                                                                                                                                                                                                                                                                                          | 3.407110                                                                          | 1.902172                                                                           | 0.052157  |                         |  |  |   |   |   |       |  |  |  |   |           |          |          |   |          |          |          |   |          |           |           |   |          |           |           |   |          |           |          |   |          |          |           |   |          |          |          |   |          |          |          |   |          |          |           |   |          |          |           |   |          |          |           |   |          |          |           |   |          |          |           |   |          |          |           |   |          |          |           |   |          |          |           |   |          |          |           |   |          |          |           |   |          |          |           |   |          |          |           |   |          |          |           |   |          |          |           |   |          |          |           |   |          |          |           |   |           |           |          |   |           |           |          |   |           |           |          |   |           |           |          |   |           |          |          |   |           |          |          |   |          |          |           |
| C                                                                                                                                                                                                                                                                                                                                                                                                                                                                                                                                                                                                                                                                                                                                                                                                                                                                                                                                                                                                                                                                                                                                                                                                                                                                                                                                                                                                                                                                                                                                                                                                                                                                                                                                                                                                                                                                                                                                                                                                                                                                                                                                                                                                                                                                                                                                                                                                                                                                                                                                                          | 2.953620                                                                          | 3.075539                                                                           | -1.730314 |                         |  |  |   |   |   |       |  |  |  |   |           |          |          |   |          |          |          |   |          |           |           |   |          |           |           |   |          |           |          |   |          |          |           |   |          |          |          |   |          |          |          |   |          |          |           |   |          |          |           |   |          |          |           |   |          |          |           |   |          |          |           |   |          |          |           |   |          |          |           |   |          |          |           |   |          |          |           |   |          |          |           |   |          |          |           |   |          |          |           |   |          |          |           |   |          |          |           |   |          |          |           |   |          |          |           |   |           |           |          |   |           |           |          |   |           |           |          |   |           |           |          |   |           |          |          |   |           |          |          |   |          |          |           |
| H                                                                                                                                                                                                                                                                                                                                                                                                                                                                                                                                                                                                                                                                                                                                                                                                                                                                                                                                                                                                                                                                                                                                                                                                                                                                                                                                                                                                                                                                                                                                                                                                                                                                                                                                                                                                                                                                                                                                                                                                                                                                                                                                                                                                                                                                                                                                                                                                                                                                                                                                                          | 3.677286                                                                          | 2.534432                                                                           | -2.352049 |                         |  |  |   |   |   |       |  |  |  |   |           |          |          |   |          |          |          |   |          |           |           |   |          |           |           |   |          |           |          |   |          |          |           |   |          |          |          |   |          |          |          |   |          |          |           |   |          |          |           |   |          |          |           |   |          |          |           |   |          |          |           |   |          |          |           |   |          |          |           |   |          |          |           |   |          |          |           |   |          |          |           |   |          |          |           |   |          |          |           |   |          |          |           |   |          |          |           |   |          |          |           |   |          |          |           |   |           |           |          |   |           |           |          |   |           |           |          |   |           |           |          |   |           |          |          |   |           |          |          |   |          |          |           |
| H                                                                                                                                                                                                                                                                                                                                                                                                                                                                                                                                                                                                                                                                                                                                                                                                                                                                                                                                                                                                                                                                                                                                                                                                                                                                                                                                                                                                                                                                                                                                                                                                                                                                                                                                                                                                                                                                                                                                                                                                                                                                                                                                                                                                                                                                                                                                                                                                                                                                                                                                                          | 2.069549                                                                          | 3.264569                                                                           | -2.347785 |                         |  |  |   |   |   |       |  |  |  |   |           |          |          |   |          |          |          |   |          |           |           |   |          |           |           |   |          |           |          |   |          |          |           |   |          |          |          |   |          |          |          |   |          |          |           |   |          |          |           |   |          |          |           |   |          |          |           |   |          |          |           |   |          |          |           |   |          |          |           |   |          |          |           |   |          |          |           |   |          |          |           |   |          |          |           |   |          |          |           |   |          |          |           |   |          |          |           |   |          |          |           |   |          |          |           |   |           |           |          |   |           |           |          |   |           |           |          |   |           |           |          |   |           |          |          |   |           |          |          |   |          |          |           |
| C                                                                                                                                                                                                                                                                                                                                                                                                                                                                                                                                                                                                                                                                                                                                                                                                                                                                                                                                                                                                                                                                                                                                                                                                                                                                                                                                                                                                                                                                                                                                                                                                                                                                                                                                                                                                                                                                                                                                                                                                                                                                                                                                                                                                                                                                                                                                                                                                                                                                                                                                                          | 3.567251                                                                          | 4.396183                                                                           | -1.237146 |                         |  |  |   |   |   |       |  |  |  |   |           |          |          |   |          |          |          |   |          |           |           |   |          |           |           |   |          |           |          |   |          |          |           |   |          |          |          |   |          |          |          |   |          |          |           |   |          |          |           |   |          |          |           |   |          |          |           |   |          |          |           |   |          |          |           |   |          |          |           |   |          |          |           |   |          |          |           |   |          |          |           |   |          |          |           |   |          |          |           |   |          |          |           |   |          |          |           |   |          |          |           |   |          |          |           |   |           |           |          |   |           |           |          |   |           |           |          |   |           |           |          |   |           |          |          |   |           |          |          |   |          |          |           |
| H                                                                                                                                                                                                                                                                                                                                                                                                                                                                                                                                                                                                                                                                                                                                                                                                                                                                                                                                                                                                                                                                                                                                                                                                                                                                                                                                                                                                                                                                                                                                                                                                                                                                                                                                                                                                                                                                                                                                                                                                                                                                                                                                                                                                                                                                                                                                                                                                                                                                                                                                                          | 2.819289                                                                          | 4.954066                                                                           | -0.654812 |                         |  |  |   |   |   |       |  |  |  |   |           |          |          |   |          |          |          |   |          |           |           |   |          |           |           |   |          |           |          |   |          |          |           |   |          |          |          |   |          |          |          |   |          |          |           |   |          |          |           |   |          |          |           |   |          |          |           |   |          |          |           |   |          |          |           |   |          |          |           |   |          |          |           |   |          |          |           |   |          |          |           |   |          |          |           |   |          |          |           |   |          |          |           |   |          |          |           |   |          |          |           |   |          |          |           |   |           |           |          |   |           |           |          |   |           |           |          |   |           |           |          |   |           |          |          |   |           |          |          |   |          |          |           |
| H                                                                                                                                                                                                                                                                                                                                                                                                                                                                                                                                                                                                                                                                                                                                                                                                                                                                                                                                                                                                                                                                                                                                                                                                                                                                                                                                                                                                                                                                                                                                                                                                                                                                                                                                                                                                                                                                                                                                                                                                                                                                                                                                                                                                                                                                                                                                                                                                                                                                                                                                                          | 4.390742                                                                          | 4.169824                                                                           | -0.545865 |                         |  |  |   |   |   |       |  |  |  |   |           |          |          |   |          |          |          |   |          |           |           |   |          |           |           |   |          |           |          |   |          |          |           |   |          |          |          |   |          |          |          |   |          |          |           |   |          |          |           |   |          |          |           |   |          |          |           |   |          |          |           |   |          |          |           |   |          |          |           |   |          |          |           |   |          |          |           |   |          |          |           |   |          |          |           |   |          |          |           |   |          |          |           |   |          |          |           |   |          |          |           |   |          |          |           |   |           |           |          |   |           |           |          |   |           |           |          |   |           |           |          |   |           |          |          |   |           |          |          |   |          |          |           |
| C                                                                                                                                                                                                                                                                                                                                                                                                                                                                                                                                                                                                                                                                                                                                                                                                                                                                                                                                                                                                                                                                                                                                                                                                                                                                                                                                                                                                                                                                                                                                                                                                                                                                                                                                                                                                                                                                                                                                                                                                                                                                                                                                                                                                                                                                                                                                                                                                                                                                                                                                                          | 4.109202                                                                          | 5.308812                                                                           | -2.356760 |                         |  |  |   |   |   |       |  |  |  |   |           |          |          |   |          |          |          |   |          |           |           |   |          |           |           |   |          |           |          |   |          |          |           |   |          |          |          |   |          |          |          |   |          |          |           |   |          |          |           |   |          |          |           |   |          |          |           |   |          |          |           |   |          |          |           |   |          |          |           |   |          |          |           |   |          |          |           |   |          |          |           |   |          |          |           |   |          |          |           |   |          |          |           |   |          |          |           |   |          |          |           |   |          |          |           |   |           |           |          |   |           |           |          |   |           |           |          |   |           |           |          |   |           |          |          |   |           |          |          |   |          |          |           |
| H                                                                                                                                                                                                                                                                                                                                                                                                                                                                                                                                                                                                                                                                                                                                                                                                                                                                                                                                                                                                                                                                                                                                                                                                                                                                                                                                                                                                                                                                                                                                                                                                                                                                                                                                                                                                                                                                                                                                                                                                                                                                                                                                                                                                                                                                                                                                                                                                                                                                                                                                                          | 4.836120                                                                          | 4.722619                                                                           | -2.939105 |                         |  |  |   |   |   |       |  |  |  |   |           |          |          |   |          |          |          |   |          |           |           |   |          |           |           |   |          |           |          |   |          |          |           |   |          |          |          |   |          |          |          |   |          |          |           |   |          |          |           |   |          |          |           |   |          |          |           |   |          |          |           |   |          |          |           |   |          |          |           |   |          |          |           |   |          |          |           |   |          |          |           |   |          |          |           |   |          |          |           |   |          |          |           |   |          |          |           |   |          |          |           |   |          |          |           |   |           |           |          |   |           |           |          |   |           |           |          |   |           |           |          |   |           |          |          |   |           |          |          |   |          |          |           |
| C                                                                                                                                                                                                                                                                                                                                                                                                                                                                                                                                                                                                                                                                                                                                                                                                                                                                                                                                                                                                                                                                                                                                                                                                                                                                                                                                                                                                                                                                                                                                                                                                                                                                                                                                                                                                                                                                                                                                                                                                                                                                                                                                                                                                                                                                                                                                                                                                                                                                                                                                                          | 4.852620                                                                          | 6.508894                                                                           | -1.749531 |                         |  |  |   |   |   |       |  |  |  |   |           |          |          |   |          |          |          |   |          |           |           |   |          |           |           |   |          |           |          |   |          |          |           |   |          |          |          |   |          |          |          |   |          |          |           |   |          |          |           |   |          |          |           |   |          |          |           |   |          |          |           |   |          |          |           |   |          |          |           |   |          |          |           |   |          |          |           |   |          |          |           |   |          |          |           |   |          |          |           |   |          |          |           |   |          |          |           |   |          |          |           |   |          |          |           |   |           |           |          |   |           |           |          |   |           |           |          |   |           |           |          |   |           |          |          |   |           |          |          |   |          |          |           |
| H                                                                                                                                                                                                                                                                                                                                                                                                                                                                                                                                                                                                                                                                                                                                                                                                                                                                                                                                                                                                                                                                                                                                                                                                                                                                                                                                                                                                                                                                                                                                                                                                                                                                                                                                                                                                                                                                                                                                                                                                                                                                                                                                                                                                                                                                                                                                                                                                                                                                                                                                                          | 5.669064                                                                          | 6.184568                                                                           | -1.094295 |                         |  |  |   |   |   |       |  |  |  |   |           |          |          |   |          |          |          |   |          |           |           |   |          |           |           |   |          |           |          |   |          |          |           |   |          |          |          |   |          |          |          |   |          |          |           |   |          |          |           |   |          |          |           |   |          |          |           |   |          |          |           |   |          |          |           |   |          |          |           |   |          |          |           |   |          |          |           |   |          |          |           |   |          |          |           |   |          |          |           |   |          |          |           |   |          |          |           |   |          |          |           |   |          |          |           |   |           |           |          |   |           |           |          |   |           |           |          |   |           |           |          |   |           |          |          |   |           |          |          |   |          |          |           |
| H                                                                                                                                                                                                                                                                                                                                                                                                                                                                                                                                                                                                                                                                                                                                                                                                                                                                                                                                                                                                                                                                                                                                                                                                                                                                                                                                                                                                                                                                                                                                                                                                                                                                                                                                                                                                                                                                                                                                                                                                                                                                                                                                                                                                                                                                                                                                                                                                                                                                                                                                                          | 5.282021                                                                          | 7.143877                                                                           | -2.532280 |                         |  |  |   |   |   |       |  |  |  |   |           |          |          |   |          |          |          |   |          |           |           |   |          |           |           |   |          |           |          |   |          |          |           |   |          |          |          |   |          |          |          |   |          |          |           |   |          |          |           |   |          |          |           |   |          |          |           |   |          |          |           |   |          |          |           |   |          |          |           |   |          |          |           |   |          |          |           |   |          |          |           |   |          |          |           |   |          |          |           |   |          |          |           |   |          |          |           |   |          |          |           |   |          |          |           |   |           |           |          |   |           |           |          |   |           |           |          |   |           |           |          |   |           |          |          |   |           |          |          |   |          |          |           |
| H                                                                                                                                                                                                                                                                                                                                                                                                                                                                                                                                                                                                                                                                                                                                                                                                                                                                                                                                                                                                                                                                                                                                                                                                                                                                                                                                                                                                                                                                                                                                                                                                                                                                                                                                                                                                                                                                                                                                                                                                                                                                                                                                                                                                                                                                                                                                                                                                                                                                                                                                                          | 4.171626                                                                          | 7.130116                                                                           | -1.153915 |                         |  |  |   |   |   |       |  |  |  |   |           |          |          |   |          |          |          |   |          |           |           |   |          |           |           |   |          |           |          |   |          |          |           |   |          |          |          |   |          |          |          |   |          |          |           |   |          |          |           |   |          |          |           |   |          |          |           |   |          |          |           |   |          |          |           |   |          |          |           |   |          |          |           |   |          |          |           |   |          |          |           |   |          |          |           |   |          |          |           |   |          |          |           |   |          |          |           |   |          |          |           |   |          |          |           |   |           |           |          |   |           |           |          |   |           |           |          |   |           |           |          |   |           |          |          |   |           |          |          |   |          |          |           |
| C                                                                                                                                                                                                                                                                                                                                                                                                                                                                                                                                                                                                                                                                                                                                                                                                                                                                                                                                                                                                                                                                                                                                                                                                                                                                                                                                                                                                                                                                                                                                                                                                                                                                                                                                                                                                                                                                                                                                                                                                                                                                                                                                                                                                                                                                                                                                                                                                                                                                                                                                                          | 3.006803                                                                          | 5.784994                                                                           | -3.316180 |                         |  |  |   |   |   |       |  |  |  |   |           |          |          |   |          |          |          |   |          |           |           |   |          |           |           |   |          |           |          |   |          |          |           |   |          |          |          |   |          |          |          |   |          |          |           |   |          |          |           |   |          |          |           |   |          |          |           |   |          |          |           |   |          |          |           |   |          |          |           |   |          |          |           |   |          |          |           |   |          |          |           |   |          |          |           |   |          |          |           |   |          |          |           |   |          |          |           |   |          |          |           |   |          |          |           |   |           |           |          |   |           |           |          |   |           |           |          |   |           |           |          |   |           |          |          |   |           |          |          |   |          |          |           |
| H                                                                                                                                                                                                                                                                                                                                                                                                                                                                                                                                                                                                                                                                                                                                                                                                                                                                                                                                                                                                                                                                                                                                                                                                                                                                                                                                                                                                                                                                                                                                                                                                                                                                                                                                                                                                                                                                                                                                                                                                                                                                                                                                                                                                                                                                                                                                                                                                                                                                                                                                                          | 2.514454                                                                          | 4.952946                                                                           | -3.829549 |                         |  |  |   |   |   |       |  |  |  |   |           |          |          |   |          |          |          |   |          |           |           |   |          |           |           |   |          |           |          |   |          |          |           |   |          |          |          |   |          |          |          |   |          |          |           |   |          |          |           |   |          |          |           |   |          |          |           |   |          |          |           |   |          |          |           |   |          |          |           |   |          |          |           |   |          |          |           |   |          |          |           |   |          |          |           |   |          |          |           |   |          |          |           |   |          |          |           |   |          |          |           |   |          |          |           |   |           |           |          |   |           |           |          |   |           |           |          |   |           |           |          |   |           |          |          |   |           |          |          |   |          |          |           |
| H                                                                                                                                                                                                                                                                                                                                                                                                                                                                                                                                                                                                                                                                                                                                                                                                                                                                                                                                                                                                                                                                                                                                                                                                                                                                                                                                                                                                                                                                                                                                                                                                                                                                                                                                                                                                                                                                                                                                                                                                                                                                                                                                                                                                                                                                                                                                                                                                                                                                                                                                                          | 2.236811                                                                          | 6.349529                                                                           | -2.774525 |                         |  |  |   |   |   |       |  |  |  |   |           |          |          |   |          |          |          |   |          |           |           |   |          |           |           |   |          |           |          |   |          |          |           |   |          |          |          |   |          |          |          |   |          |          |           |   |          |          |           |   |          |          |           |   |          |          |           |   |          |          |           |   |          |          |           |   |          |          |           |   |          |          |           |   |          |          |           |   |          |          |           |   |          |          |           |   |          |          |           |   |          |          |           |   |          |          |           |   |          |          |           |   |          |          |           |   |           |           |          |   |           |           |          |   |           |           |          |   |           |           |          |   |           |          |          |   |           |          |          |   |          |          |           |
| H                                                                                                                                                                                                                                                                                                                                                                                                                                                                                                                                                                                                                                                                                                                                                                                                                                                                                                                                                                                                                                                                                                                                                                                                                                                                                                                                                                                                                                                                                                                                                                                                                                                                                                                                                                                                                                                                                                                                                                                                                                                                                                                                                                                                                                                                                                                                                                                                                                                                                                                                                          | 3.421847                                                                          | 6.445012                                                                           | -4.085905 |                         |  |  |   |   |   |       |  |  |  |   |           |          |          |   |          |          |          |   |          |           |           |   |          |           |           |   |          |           |          |   |          |          |           |   |          |          |          |   |          |          |          |   |          |          |           |   |          |          |           |   |          |          |           |   |          |          |           |   |          |          |           |   |          |          |           |   |          |          |           |   |          |          |           |   |          |          |           |   |          |          |           |   |          |          |           |   |          |          |           |   |          |          |           |   |          |          |           |   |          |          |           |   |          |          |           |   |           |           |          |   |           |           |          |   |           |           |          |   |           |           |          |   |           |          |          |   |           |          |          |   |          |          |           |
| C                                                                                                                                                                                                                                                                                                                                                                                                                                                                                                                                                                                                                                                                                                                                                                                                                                                                                                                                                                                                                                                                                                                                                                                                                                                                                                                                                                                                                                                                                                                                                                                                                                                                                                                                                                                                                                                                                                                                                                                                                                                                                                                                                                                                                                                                                                                                                                                                                                                                                                                                                          | -0.701970                                                                         | -0.369002                                                                          | 1.288346  |                         |  |  |   |   |   |       |  |  |  |   |           |          |          |   |          |          |          |   |          |           |           |   |          |           |           |   |          |           |          |   |          |          |           |   |          |          |          |   |          |          |          |   |          |          |           |   |          |          |           |   |          |          |           |   |          |          |           |   |          |          |           |   |          |          |           |   |          |          |           |   |          |          |           |   |          |          |           |   |          |          |           |   |          |          |           |   |          |          |           |   |          |          |           |   |          |          |           |   |          |          |           |   |          |          |           |   |           |           |          |   |           |           |          |   |           |           |          |   |           |           |          |   |           |          |          |   |           |          |          |   |          |          |           |
| H                                                                                                                                                                                                                                                                                                                                                                                                                                                                                                                                                                                                                                                                                                                                                                                                                                                                                                                                                                                                                                                                                                                                                                                                                                                                                                                                                                                                                                                                                                                                                                                                                                                                                                                                                                                                                                                                                                                                                                                                                                                                                                                                                                                                                                                                                                                                                                                                                                                                                                                                                          | -0.146307                                                                         | -0.892963                                                                          | 2.079948  |                         |  |  |   |   |   |       |  |  |  |   |           |          |          |   |          |          |          |   |          |           |           |   |          |           |           |   |          |           |          |   |          |          |           |   |          |          |          |   |          |          |          |   |          |          |           |   |          |          |           |   |          |          |           |   |          |          |           |   |          |          |           |   |          |          |           |   |          |          |           |   |          |          |           |   |          |          |           |   |          |          |           |   |          |          |           |   |          |          |           |   |          |          |           |   |          |          |           |   |          |          |           |   |          |          |           |   |           |           |          |   |           |           |          |   |           |           |          |   |           |           |          |   |           |          |          |   |           |          |          |   |          |          |           |
| H                                                                                                                                                                                                                                                                                                                                                                                                                                                                                                                                                                                                                                                                                                                                                                                                                                                                                                                                                                                                                                                                                                                                                                                                                                                                                                                                                                                                                                                                                                                                                                                                                                                                                                                                                                                                                                                                                                                                                                                                                                                                                                                                                                                                                                                                                                                                                                                                                                                                                                                                                          | -1.116685                                                                         | -1.135518                                                                          | 0.618265  |                         |  |  |   |   |   |       |  |  |  |   |           |          |          |   |          |          |          |   |          |           |           |   |          |           |           |   |          |           |          |   |          |          |           |   |          |          |          |   |          |          |          |   |          |          |           |   |          |          |           |   |          |          |           |   |          |          |           |   |          |          |           |   |          |          |           |   |          |          |           |   |          |          |           |   |          |          |           |   |          |          |           |   |          |          |           |   |          |          |           |   |          |          |           |   |          |          |           |   |          |          |           |   |          |          |           |   |           |           |          |   |           |           |          |   |           |           |          |   |           |           |          |   |           |          |          |   |           |          |          |   |          |          |           |
| F                                                                                                                                                                                                                                                                                                                                                                                                                                                                                                                                                                                                                                                                                                                                                                                                                                                                                                                                                                                                                                                                                                                                                                                                                                                                                                                                                                                                                                                                                                                                                                                                                                                                                                                                                                                                                                                                                                                                                                                                                                                                                                                                                                                                                                                                                                                                                                                                                                                                                                                                                          | -2.652298                                                                         | -0.477821                                                                          | 2.603207  |                         |  |  |   |   |   |       |  |  |  |   |           |          |          |   |          |          |          |   |          |           |           |   |          |           |           |   |          |           |          |   |          |          |           |   |          |          |          |   |          |          |          |   |          |          |           |   |          |          |           |   |          |          |           |   |          |          |           |   |          |          |           |   |          |          |           |   |          |          |           |   |          |          |           |   |          |          |           |   |          |          |           |   |          |          |           |   |          |          |           |   |          |          |           |   |          |          |           |   |          |          |           |   |          |          |           |   |           |           |          |   |           |           |          |   |           |           |          |   |           |           |          |   |           |          |          |   |           |          |          |   |          |          |           |
| F                                                                                                                                                                                                                                                                                                                                                                                                                                                                                                                                                                                                                                                                                                                                                                                                                                                                                                                                                                                                                                                                                                                                                                                                                                                                                                                                                                                                                                                                                                                                                                                                                                                                                                                                                                                                                                                                                                                                                                                                                                                                                                                                                                                                                                                                                                                                                                                                                                                                                                                                                          | -1.424322                                                                         | 1.314893                                                                           | 2.815886  |                         |  |  |   |   |   |       |  |  |  |   |           |          |          |   |          |          |          |   |          |           |           |   |          |           |           |   |          |           |          |   |          |          |           |   |          |          |          |   |          |          |          |   |          |          |           |   |          |          |           |   |          |          |           |   |          |          |           |   |          |          |           |   |          |          |           |   |          |          |           |   |          |          |           |   |          |          |           |   |          |          |           |   |          |          |           |   |          |          |           |   |          |          |           |   |          |          |           |   |          |          |           |   |          |          |           |   |           |           |          |   |           |           |          |   |           |           |          |   |           |           |          |   |           |          |          |   |           |          |          |   |          |          |           |
| F                                                                                                                                                                                                                                                                                                                                                                                                                                                                                                                                                                                                                                                                                                                                                                                                                                                                                                                                                                                                                                                                                                                                                                                                                                                                                                                                                                                                                                                                                                                                                                                                                                                                                                                                                                                                                                                                                                                                                                                                                                                                                                                                                                                                                                                                                                                                                                                                                                                                                                                                                          | -2.619137                                                                         | 1.022806                                                                           | 1.017350  |                         |  |  |   |   |   |       |  |  |  |   |           |          |          |   |          |          |          |   |          |           |           |   |          |           |           |   |          |           |          |   |          |          |           |   |          |          |          |   |          |          |          |   |          |          |           |   |          |          |           |   |          |          |           |   |          |          |           |   |          |          |           |   |          |          |           |   |          |          |           |   |          |          |           |   |          |          |           |   |          |          |           |   |          |          |           |   |          |          |           |   |          |          |           |   |          |          |           |   |          |          |           |   |          |          |           |   |           |           |          |   |           |           |          |   |           |           |          |   |           |           |          |   |           |          |          |   |           |          |          |   |          |          |           |
| O                                                                                                                                                                                                                                                                                                                                                                                                                                                                                                                                                                                                                                                                                                                                                                                                                                                                                                                                                                                                                                                                                                                                                                                                                                                                                                                                                                                                                                                                                                                                                                                                                                                                                                                                                                                                                                                                                                                                                                                                                                                                                                                                                                                                                                                                                                                                                                                                                                                                                                                                                          | 1.964641                                                                          | 0.966874                                                                           | -1.136087 |                         |  |  |   |   |   |       |  |  |  |   |           |          |          |   |          |          |          |   |          |           |           |   |          |           |           |   |          |           |          |   |          |          |           |   |          |          |          |   |          |          |          |   |          |          |           |   |          |          |           |   |          |          |           |   |          |          |           |   |          |          |           |   |          |          |           |   |          |          |           |   |          |          |           |   |          |          |           |   |          |          |           |   |          |          |           |   |          |          |           |   |          |          |           |   |          |          |           |   |          |          |           |   |          |          |           |   |           |           |          |   |           |           |          |   |           |           |          |   |           |           |          |   |           |          |          |   |           |          |          |   |          |          |           |

| 2                                                                                                                                                                                                                                                                                                                                                                                                                                                                                                                                                                                                                                                                                                                                                                                                                                                                                                                                                                                                                                                                                                                                                                                                                                                                                                                                                                                                                                                                                                                                                                                                                                                                                                                                                                                                                                                                                                                                                                                                                                                                                                                                                                                                                                                                                                                                                                                                                                                                   | 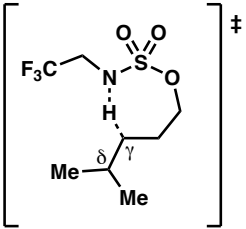 |  |           |                         |  |  |   |          |          |           |   |           |          |           |   |           |          |           |   |           |           |           |   |           |          |           |   |           |          |           |   |           |          |           |   |           |          |           |   |           |          |           |   |           |          |           |   |           |          |           |   |           |          |           |   |           |          |           |   |           |          |           |   |           |          |           |   |           |          |           |   |           |          |           |   |           |          |          |   |           |          |          |   |           |          |          |   |           |          |          |   |           |          |           |   |           |          |           |   |           |          |          |   |           |          |          |   |          |          |           |   |          |          |           |   |          |           |           |   |          |          |          |   |          |          |           |   |          |          |          |
|---------------------------------------------------------------------------------------------------------------------------------------------------------------------------------------------------------------------------------------------------------------------------------------------------------------------------------------------------------------------------------------------------------------------------------------------------------------------------------------------------------------------------------------------------------------------------------------------------------------------------------------------------------------------------------------------------------------------------------------------------------------------------------------------------------------------------------------------------------------------------------------------------------------------------------------------------------------------------------------------------------------------------------------------------------------------------------------------------------------------------------------------------------------------------------------------------------------------------------------------------------------------------------------------------------------------------------------------------------------------------------------------------------------------------------------------------------------------------------------------------------------------------------------------------------------------------------------------------------------------------------------------------------------------------------------------------------------------------------------------------------------------------------------------------------------------------------------------------------------------------------------------------------------------------------------------------------------------------------------------------------------------------------------------------------------------------------------------------------------------------------------------------------------------------------------------------------------------------------------------------------------------------------------------------------------------------------------------------------------------------------------------------------------------------------------------------------------------|-----------------------------------------------------------------------------------|------------------------------------------------------------------------------------|-----------|-------------------------|--|--|---|----------|----------|-----------|---|-----------|----------|-----------|---|-----------|----------|-----------|---|-----------|-----------|-----------|---|-----------|----------|-----------|---|-----------|----------|-----------|---|-----------|----------|-----------|---|-----------|----------|-----------|---|-----------|----------|-----------|---|-----------|----------|-----------|---|-----------|----------|-----------|---|-----------|----------|-----------|---|-----------|----------|-----------|---|-----------|----------|-----------|---|-----------|----------|-----------|---|-----------|----------|-----------|---|-----------|----------|-----------|---|-----------|----------|----------|---|-----------|----------|----------|---|-----------|----------|----------|---|-----------|----------|----------|---|-----------|----------|-----------|---|-----------|----------|-----------|---|-----------|----------|----------|---|-----------|----------|----------|---|----------|----------|-----------|---|----------|----------|-----------|---|----------|-----------|-----------|---|----------|----------|----------|---|----------|----------|-----------|---|----------|----------|----------|
| <table border="0" style="width: 100%; text-align: center;"> <thead> <tr> <th style="text-align: left;">Atom</th> <th colspan="3">Coordinates (Angstroms)</th> </tr> <tr> <th></th> <th>X</th> <th>Y</th> <th>Z</th> </tr> </thead> </table>                                                                                                                                                                                                                                                                                                                                                                                                                                                                                                                                                                                                                                                                                                                                                                                                                                                                                                                                                                                                                                                                                                                                                                                                                                                                                                                                                                                                                                                                                                                                                                                                                                                                                                                                                                                                                                                                                                                                                                                                                                                                                                                                                                                                                         |                                                                                   |                                                                                    | Atom      | Coordinates (Angstroms) |  |  |   | X        | Y        | Z         |   |           |          |           |   |           |          |           |   |           |           |           |   |           |          |           |   |           |          |           |   |           |          |           |   |           |          |           |   |           |          |           |   |           |          |           |   |           |          |           |   |           |          |           |   |           |          |           |   |           |          |           |   |           |          |           |   |           |          |           |   |           |          |           |   |           |          |          |   |           |          |          |   |           |          |          |   |           |          |          |   |           |          |           |   |           |          |           |   |           |          |          |   |           |          |          |   |          |          |           |   |          |          |           |   |          |           |           |   |          |          |          |   |          |          |           |   |          |          |          |
| Atom                                                                                                                                                                                                                                                                                                                                                                                                                                                                                                                                                                                                                                                                                                                                                                                                                                                                                                                                                                                                                                                                                                                                                                                                                                                                                                                                                                                                                                                                                                                                                                                                                                                                                                                                                                                                                                                                                                                                                                                                                                                                                                                                                                                                                                                                                                                                                                                                                                                                | Coordinates (Angstroms)                                                           |                                                                                    |           |                         |  |  |   |          |          |           |   |           |          |           |   |           |          |           |   |           |           |           |   |           |          |           |   |           |          |           |   |           |          |           |   |           |          |           |   |           |          |           |   |           |          |           |   |           |          |           |   |           |          |           |   |           |          |           |   |           |          |           |   |           |          |           |   |           |          |           |   |           |          |           |   |           |          |          |   |           |          |          |   |           |          |          |   |           |          |          |   |           |          |           |   |           |          |           |   |           |          |          |   |           |          |          |   |          |          |           |   |          |          |           |   |          |           |           |   |          |          |          |   |          |          |           |   |          |          |          |
|                                                                                                                                                                                                                                                                                                                                                                                                                                                                                                                                                                                                                                                                                                                                                                                                                                                                                                                                                                                                                                                                                                                                                                                                                                                                                                                                                                                                                                                                                                                                                                                                                                                                                                                                                                                                                                                                                                                                                                                                                                                                                                                                                                                                                                                                                                                                                                                                                                                                     | X                                                                                 | Y                                                                                  | Z         |                         |  |  |   |          |          |           |   |           |          |           |   |           |          |           |   |           |           |           |   |           |          |           |   |           |          |           |   |           |          |           |   |           |          |           |   |           |          |           |   |           |          |           |   |           |          |           |   |           |          |           |   |           |          |           |   |           |          |           |   |           |          |           |   |           |          |           |   |           |          |           |   |           |          |          |   |           |          |          |   |           |          |          |   |           |          |          |   |           |          |           |   |           |          |           |   |           |          |          |   |           |          |          |   |          |          |           |   |          |          |           |   |          |           |           |   |          |          |          |   |          |          |           |   |          |          |          |
| <table border="0" style="width: 100%; text-align: center;"> <tbody> <tr><td colspan="4">-----</td></tr> <tr><td>C</td><td>2.109103</td><td>1.111449</td><td>-0.000659</td></tr> <tr><td>N</td><td>-0.123832</td><td>0.873014</td><td>-0.941745</td></tr> <tr><td>S</td><td>-1.101009</td><td>0.149672</td><td>-2.100089</td></tr> <tr><td>O</td><td>-0.475408</td><td>-1.089670</td><td>-2.543919</td></tr> <tr><td>O</td><td>-2.461406</td><td>0.183310</td><td>-1.576164</td></tr> <tr><td>C</td><td>-1.804816</td><td>2.373065</td><td>-3.400222</td></tr> <tr><td>H</td><td>-2.806510</td><td>2.150945</td><td>-3.025363</td></tr> <tr><td>H</td><td>-1.870793</td><td>2.627675</td><td>-4.459116</td></tr> <tr><td>O</td><td>-1.021658</td><td>1.137295</td><td>-3.408037</td></tr> <tr><td>C</td><td>-1.110489</td><td>3.493710</td><td>-2.622321</td></tr> <tr><td>H</td><td>-1.642704</td><td>4.424505</td><td>-2.868004</td></tr> <tr><td>H</td><td>-0.096438</td><td>3.613954</td><td>-3.019904</td></tr> <tr><td>C</td><td>-1.063532</td><td>3.332718</td><td>-1.108204</td></tr> <tr><td>H</td><td>-0.608371</td><td>2.154814</td><td>-0.892520</td></tr> <tr><td>H</td><td>-0.259076</td><td>3.926091</td><td>-0.656783</td></tr> <tr><td>C</td><td>-2.358322</td><td>3.418408</td><td>-0.303671</td></tr> <tr><td>H</td><td>-3.102188</td><td>2.752728</td><td>-0.758487</td></tr> <tr><td>C</td><td>-2.141616</td><td>2.966028</td><td>1.149785</td></tr> <tr><td>H</td><td>-1.395932</td><td>3.597029</td><td>1.648853</td></tr> <tr><td>H</td><td>-3.075552</td><td>3.039325</td><td>1.716184</td></tr> <tr><td>H</td><td>-1.797567</td><td>1.929123</td><td>1.198001</td></tr> <tr><td>C</td><td>-2.918285</td><td>4.859806</td><td>-0.341815</td></tr> <tr><td>H</td><td>-3.146274</td><td>5.190847</td><td>-1.359667</td></tr> <tr><td>H</td><td>-3.844820</td><td>4.910808</td><td>0.239943</td></tr> <tr><td>H</td><td>-2.206104</td><td>5.568584</td><td>0.096977</td></tr> <tr><td>C</td><td>1.299516</td><td>0.913876</td><td>-1.272969</td></tr> <tr><td>H</td><td>1.565870</td><td>1.719026</td><td>-1.968904</td></tr> <tr><td>H</td><td>1.608656</td><td>-0.036154</td><td>-1.719933</td></tr> <tr><td>F</td><td>1.788758</td><td>2.269191</td><td>0.631756</td></tr> <tr><td>F</td><td>3.430752</td><td>1.173715</td><td>-0.301661</td></tr> <tr><td>F</td><td>1.940378</td><td>0.110446</td><td>0.885905</td></tr> </tbody> </table> |                                                                                   |                                                                                    | -----     |                         |  |  | C | 2.109103 | 1.111449 | -0.000659 | N | -0.123832 | 0.873014 | -0.941745 | S | -1.101009 | 0.149672 | -2.100089 | O | -0.475408 | -1.089670 | -2.543919 | O | -2.461406 | 0.183310 | -1.576164 | C | -1.804816 | 2.373065 | -3.400222 | H | -2.806510 | 2.150945 | -3.025363 | H | -1.870793 | 2.627675 | -4.459116 | O | -1.021658 | 1.137295 | -3.408037 | C | -1.110489 | 3.493710 | -2.622321 | H | -1.642704 | 4.424505 | -2.868004 | H | -0.096438 | 3.613954 | -3.019904 | C | -1.063532 | 3.332718 | -1.108204 | H | -0.608371 | 2.154814 | -0.892520 | H | -0.259076 | 3.926091 | -0.656783 | C | -2.358322 | 3.418408 | -0.303671 | H | -3.102188 | 2.752728 | -0.758487 | C | -2.141616 | 2.966028 | 1.149785 | H | -1.395932 | 3.597029 | 1.648853 | H | -3.075552 | 3.039325 | 1.716184 | H | -1.797567 | 1.929123 | 1.198001 | C | -2.918285 | 4.859806 | -0.341815 | H | -3.146274 | 5.190847 | -1.359667 | H | -3.844820 | 4.910808 | 0.239943 | H | -2.206104 | 5.568584 | 0.096977 | C | 1.299516 | 0.913876 | -1.272969 | H | 1.565870 | 1.719026 | -1.968904 | H | 1.608656 | -0.036154 | -1.719933 | F | 1.788758 | 2.269191 | 0.631756 | F | 3.430752 | 1.173715 | -0.301661 | F | 1.940378 | 0.110446 | 0.885905 |
| -----                                                                                                                                                                                                                                                                                                                                                                                                                                                                                                                                                                                                                                                                                                                                                                                                                                                                                                                                                                                                                                                                                                                                                                                                                                                                                                                                                                                                                                                                                                                                                                                                                                                                                                                                                                                                                                                                                                                                                                                                                                                                                                                                                                                                                                                                                                                                                                                                                                                               |                                                                                   |                                                                                    |           |                         |  |  |   |          |          |           |   |           |          |           |   |           |          |           |   |           |           |           |   |           |          |           |   |           |          |           |   |           |          |           |   |           |          |           |   |           |          |           |   |           |          |           |   |           |          |           |   |           |          |           |   |           |          |           |   |           |          |           |   |           |          |           |   |           |          |           |   |           |          |           |   |           |          |          |   |           |          |          |   |           |          |          |   |           |          |          |   |           |          |           |   |           |          |           |   |           |          |          |   |           |          |          |   |          |          |           |   |          |          |           |   |          |           |           |   |          |          |          |   |          |          |           |   |          |          |          |
| C                                                                                                                                                                                                                                                                                                                                                                                                                                                                                                                                                                                                                                                                                                                                                                                                                                                                                                                                                                                                                                                                                                                                                                                                                                                                                                                                                                                                                                                                                                                                                                                                                                                                                                                                                                                                                                                                                                                                                                                                                                                                                                                                                                                                                                                                                                                                                                                                                                                                   | 2.109103                                                                          | 1.111449                                                                           | -0.000659 |                         |  |  |   |          |          |           |   |           |          |           |   |           |          |           |   |           |           |           |   |           |          |           |   |           |          |           |   |           |          |           |   |           |          |           |   |           |          |           |   |           |          |           |   |           |          |           |   |           |          |           |   |           |          |           |   |           |          |           |   |           |          |           |   |           |          |           |   |           |          |           |   |           |          |          |   |           |          |          |   |           |          |          |   |           |          |          |   |           |          |           |   |           |          |           |   |           |          |          |   |           |          |          |   |          |          |           |   |          |          |           |   |          |           |           |   |          |          |          |   |          |          |           |   |          |          |          |
| N                                                                                                                                                                                                                                                                                                                                                                                                                                                                                                                                                                                                                                                                                                                                                                                                                                                                                                                                                                                                                                                                                                                                                                                                                                                                                                                                                                                                                                                                                                                                                                                                                                                                                                                                                                                                                                                                                                                                                                                                                                                                                                                                                                                                                                                                                                                                                                                                                                                                   | -0.123832                                                                         | 0.873014                                                                           | -0.941745 |                         |  |  |   |          |          |           |   |           |          |           |   |           |          |           |   |           |           |           |   |           |          |           |   |           |          |           |   |           |          |           |   |           |          |           |   |           |          |           |   |           |          |           |   |           |          |           |   |           |          |           |   |           |          |           |   |           |          |           |   |           |          |           |   |           |          |           |   |           |          |           |   |           |          |          |   |           |          |          |   |           |          |          |   |           |          |          |   |           |          |           |   |           |          |           |   |           |          |          |   |           |          |          |   |          |          |           |   |          |          |           |   |          |           |           |   |          |          |          |   |          |          |           |   |          |          |          |
| S                                                                                                                                                                                                                                                                                                                                                                                                                                                                                                                                                                                                                                                                                                                                                                                                                                                                                                                                                                                                                                                                                                                                                                                                                                                                                                                                                                                                                                                                                                                                                                                                                                                                                                                                                                                                                                                                                                                                                                                                                                                                                                                                                                                                                                                                                                                                                                                                                                                                   | -1.101009                                                                         | 0.149672                                                                           | -2.100089 |                         |  |  |   |          |          |           |   |           |          |           |   |           |          |           |   |           |           |           |   |           |          |           |   |           |          |           |   |           |          |           |   |           |          |           |   |           |          |           |   |           |          |           |   |           |          |           |   |           |          |           |   |           |          |           |   |           |          |           |   |           |          |           |   |           |          |           |   |           |          |           |   |           |          |          |   |           |          |          |   |           |          |          |   |           |          |          |   |           |          |           |   |           |          |           |   |           |          |          |   |           |          |          |   |          |          |           |   |          |          |           |   |          |           |           |   |          |          |          |   |          |          |           |   |          |          |          |
| O                                                                                                                                                                                                                                                                                                                                                                                                                                                                                                                                                                                                                                                                                                                                                                                                                                                                                                                                                                                                                                                                                                                                                                                                                                                                                                                                                                                                                                                                                                                                                                                                                                                                                                                                                                                                                                                                                                                                                                                                                                                                                                                                                                                                                                                                                                                                                                                                                                                                   | -0.475408                                                                         | -1.089670                                                                          | -2.543919 |                         |  |  |   |          |          |           |   |           |          |           |   |           |          |           |   |           |           |           |   |           |          |           |   |           |          |           |   |           |          |           |   |           |          |           |   |           |          |           |   |           |          |           |   |           |          |           |   |           |          |           |   |           |          |           |   |           |          |           |   |           |          |           |   |           |          |           |   |           |          |           |   |           |          |          |   |           |          |          |   |           |          |          |   |           |          |          |   |           |          |           |   |           |          |           |   |           |          |          |   |           |          |          |   |          |          |           |   |          |          |           |   |          |           |           |   |          |          |          |   |          |          |           |   |          |          |          |
| O                                                                                                                                                                                                                                                                                                                                                                                                                                                                                                                                                                                                                                                                                                                                                                                                                                                                                                                                                                                                                                                                                                                                                                                                                                                                                                                                                                                                                                                                                                                                                                                                                                                                                                                                                                                                                                                                                                                                                                                                                                                                                                                                                                                                                                                                                                                                                                                                                                                                   | -2.461406                                                                         | 0.183310                                                                           | -1.576164 |                         |  |  |   |          |          |           |   |           |          |           |   |           |          |           |   |           |           |           |   |           |          |           |   |           |          |           |   |           |          |           |   |           |          |           |   |           |          |           |   |           |          |           |   |           |          |           |   |           |          |           |   |           |          |           |   |           |          |           |   |           |          |           |   |           |          |           |   |           |          |           |   |           |          |          |   |           |          |          |   |           |          |          |   |           |          |          |   |           |          |           |   |           |          |           |   |           |          |          |   |           |          |          |   |          |          |           |   |          |          |           |   |          |           |           |   |          |          |          |   |          |          |           |   |          |          |          |
| C                                                                                                                                                                                                                                                                                                                                                                                                                                                                                                                                                                                                                                                                                                                                                                                                                                                                                                                                                                                                                                                                                                                                                                                                                                                                                                                                                                                                                                                                                                                                                                                                                                                                                                                                                                                                                                                                                                                                                                                                                                                                                                                                                                                                                                                                                                                                                                                                                                                                   | -1.804816                                                                         | 2.373065                                                                           | -3.400222 |                         |  |  |   |          |          |           |   |           |          |           |   |           |          |           |   |           |           |           |   |           |          |           |   |           |          |           |   |           |          |           |   |           |          |           |   |           |          |           |   |           |          |           |   |           |          |           |   |           |          |           |   |           |          |           |   |           |          |           |   |           |          |           |   |           |          |           |   |           |          |           |   |           |          |          |   |           |          |          |   |           |          |          |   |           |          |          |   |           |          |           |   |           |          |           |   |           |          |          |   |           |          |          |   |          |          |           |   |          |          |           |   |          |           |           |   |          |          |          |   |          |          |           |   |          |          |          |
| H                                                                                                                                                                                                                                                                                                                                                                                                                                                                                                                                                                                                                                                                                                                                                                                                                                                                                                                                                                                                                                                                                                                                                                                                                                                                                                                                                                                                                                                                                                                                                                                                                                                                                                                                                                                                                                                                                                                                                                                                                                                                                                                                                                                                                                                                                                                                                                                                                                                                   | -2.806510                                                                         | 2.150945                                                                           | -3.025363 |                         |  |  |   |          |          |           |   |           |          |           |   |           |          |           |   |           |           |           |   |           |          |           |   |           |          |           |   |           |          |           |   |           |          |           |   |           |          |           |   |           |          |           |   |           |          |           |   |           |          |           |   |           |          |           |   |           |          |           |   |           |          |           |   |           |          |           |   |           |          |           |   |           |          |          |   |           |          |          |   |           |          |          |   |           |          |          |   |           |          |           |   |           |          |           |   |           |          |          |   |           |          |          |   |          |          |           |   |          |          |           |   |          |           |           |   |          |          |          |   |          |          |           |   |          |          |          |
| H                                                                                                                                                                                                                                                                                                                                                                                                                                                                                                                                                                                                                                                                                                                                                                                                                                                                                                                                                                                                                                                                                                                                                                                                                                                                                                                                                                                                                                                                                                                                                                                                                                                                                                                                                                                                                                                                                                                                                                                                                                                                                                                                                                                                                                                                                                                                                                                                                                                                   | -1.870793                                                                         | 2.627675                                                                           | -4.459116 |                         |  |  |   |          |          |           |   |           |          |           |   |           |          |           |   |           |           |           |   |           |          |           |   |           |          |           |   |           |          |           |   |           |          |           |   |           |          |           |   |           |          |           |   |           |          |           |   |           |          |           |   |           |          |           |   |           |          |           |   |           |          |           |   |           |          |           |   |           |          |           |   |           |          |          |   |           |          |          |   |           |          |          |   |           |          |          |   |           |          |           |   |           |          |           |   |           |          |          |   |           |          |          |   |          |          |           |   |          |          |           |   |          |           |           |   |          |          |          |   |          |          |           |   |          |          |          |
| O                                                                                                                                                                                                                                                                                                                                                                                                                                                                                                                                                                                                                                                                                                                                                                                                                                                                                                                                                                                                                                                                                                                                                                                                                                                                                                                                                                                                                                                                                                                                                                                                                                                                                                                                                                                                                                                                                                                                                                                                                                                                                                                                                                                                                                                                                                                                                                                                                                                                   | -1.021658                                                                         | 1.137295                                                                           | -3.408037 |                         |  |  |   |          |          |           |   |           |          |           |   |           |          |           |   |           |           |           |   |           |          |           |   |           |          |           |   |           |          |           |   |           |          |           |   |           |          |           |   |           |          |           |   |           |          |           |   |           |          |           |   |           |          |           |   |           |          |           |   |           |          |           |   |           |          |           |   |           |          |           |   |           |          |          |   |           |          |          |   |           |          |          |   |           |          |          |   |           |          |           |   |           |          |           |   |           |          |          |   |           |          |          |   |          |          |           |   |          |          |           |   |          |           |           |   |          |          |          |   |          |          |           |   |          |          |          |
| C                                                                                                                                                                                                                                                                                                                                                                                                                                                                                                                                                                                                                                                                                                                                                                                                                                                                                                                                                                                                                                                                                                                                                                                                                                                                                                                                                                                                                                                                                                                                                                                                                                                                                                                                                                                                                                                                                                                                                                                                                                                                                                                                                                                                                                                                                                                                                                                                                                                                   | -1.110489                                                                         | 3.493710                                                                           | -2.622321 |                         |  |  |   |          |          |           |   |           |          |           |   |           |          |           |   |           |           |           |   |           |          |           |   |           |          |           |   |           |          |           |   |           |          |           |   |           |          |           |   |           |          |           |   |           |          |           |   |           |          |           |   |           |          |           |   |           |          |           |   |           |          |           |   |           |          |           |   |           |          |           |   |           |          |          |   |           |          |          |   |           |          |          |   |           |          |          |   |           |          |           |   |           |          |           |   |           |          |          |   |           |          |          |   |          |          |           |   |          |          |           |   |          |           |           |   |          |          |          |   |          |          |           |   |          |          |          |
| H                                                                                                                                                                                                                                                                                                                                                                                                                                                                                                                                                                                                                                                                                                                                                                                                                                                                                                                                                                                                                                                                                                                                                                                                                                                                                                                                                                                                                                                                                                                                                                                                                                                                                                                                                                                                                                                                                                                                                                                                                                                                                                                                                                                                                                                                                                                                                                                                                                                                   | -1.642704                                                                         | 4.424505                                                                           | -2.868004 |                         |  |  |   |          |          |           |   |           |          |           |   |           |          |           |   |           |           |           |   |           |          |           |   |           |          |           |   |           |          |           |   |           |          |           |   |           |          |           |   |           |          |           |   |           |          |           |   |           |          |           |   |           |          |           |   |           |          |           |   |           |          |           |   |           |          |           |   |           |          |           |   |           |          |          |   |           |          |          |   |           |          |          |   |           |          |          |   |           |          |           |   |           |          |           |   |           |          |          |   |           |          |          |   |          |          |           |   |          |          |           |   |          |           |           |   |          |          |          |   |          |          |           |   |          |          |          |
| H                                                                                                                                                                                                                                                                                                                                                                                                                                                                                                                                                                                                                                                                                                                                                                                                                                                                                                                                                                                                                                                                                                                                                                                                                                                                                                                                                                                                                                                                                                                                                                                                                                                                                                                                                                                                                                                                                                                                                                                                                                                                                                                                                                                                                                                                                                                                                                                                                                                                   | -0.096438                                                                         | 3.613954                                                                           | -3.019904 |                         |  |  |   |          |          |           |   |           |          |           |   |           |          |           |   |           |           |           |   |           |          |           |   |           |          |           |   |           |          |           |   |           |          |           |   |           |          |           |   |           |          |           |   |           |          |           |   |           |          |           |   |           |          |           |   |           |          |           |   |           |          |           |   |           |          |           |   |           |          |           |   |           |          |          |   |           |          |          |   |           |          |          |   |           |          |          |   |           |          |           |   |           |          |           |   |           |          |          |   |           |          |          |   |          |          |           |   |          |          |           |   |          |           |           |   |          |          |          |   |          |          |           |   |          |          |          |
| C                                                                                                                                                                                                                                                                                                                                                                                                                                                                                                                                                                                                                                                                                                                                                                                                                                                                                                                                                                                                                                                                                                                                                                                                                                                                                                                                                                                                                                                                                                                                                                                                                                                                                                                                                                                                                                                                                                                                                                                                                                                                                                                                                                                                                                                                                                                                                                                                                                                                   | -1.063532                                                                         | 3.332718                                                                           | -1.108204 |                         |  |  |   |          |          |           |   |           |          |           |   |           |          |           |   |           |           |           |   |           |          |           |   |           |          |           |   |           |          |           |   |           |          |           |   |           |          |           |   |           |          |           |   |           |          |           |   |           |          |           |   |           |          |           |   |           |          |           |   |           |          |           |   |           |          |           |   |           |          |           |   |           |          |          |   |           |          |          |   |           |          |          |   |           |          |          |   |           |          |           |   |           |          |           |   |           |          |          |   |           |          |          |   |          |          |           |   |          |          |           |   |          |           |           |   |          |          |          |   |          |          |           |   |          |          |          |
| H                                                                                                                                                                                                                                                                                                                                                                                                                                                                                                                                                                                                                                                                                                                                                                                                                                                                                                                                                                                                                                                                                                                                                                                                                                                                                                                                                                                                                                                                                                                                                                                                                                                                                                                                                                                                                                                                                                                                                                                                                                                                                                                                                                                                                                                                                                                                                                                                                                                                   | -0.608371                                                                         | 2.154814                                                                           | -0.892520 |                         |  |  |   |          |          |           |   |           |          |           |   |           |          |           |   |           |           |           |   |           |          |           |   |           |          |           |   |           |          |           |   |           |          |           |   |           |          |           |   |           |          |           |   |           |          |           |   |           |          |           |   |           |          |           |   |           |          |           |   |           |          |           |   |           |          |           |   |           |          |           |   |           |          |          |   |           |          |          |   |           |          |          |   |           |          |          |   |           |          |           |   |           |          |           |   |           |          |          |   |           |          |          |   |          |          |           |   |          |          |           |   |          |           |           |   |          |          |          |   |          |          |           |   |          |          |          |
| H                                                                                                                                                                                                                                                                                                                                                                                                                                                                                                                                                                                                                                                                                                                                                                                                                                                                                                                                                                                                                                                                                                                                                                                                                                                                                                                                                                                                                                                                                                                                                                                                                                                                                                                                                                                                                                                                                                                                                                                                                                                                                                                                                                                                                                                                                                                                                                                                                                                                   | -0.259076                                                                         | 3.926091                                                                           | -0.656783 |                         |  |  |   |          |          |           |   |           |          |           |   |           |          |           |   |           |           |           |   |           |          |           |   |           |          |           |   |           |          |           |   |           |          |           |   |           |          |           |   |           |          |           |   |           |          |           |   |           |          |           |   |           |          |           |   |           |          |           |   |           |          |           |   |           |          |           |   |           |          |           |   |           |          |          |   |           |          |          |   |           |          |          |   |           |          |          |   |           |          |           |   |           |          |           |   |           |          |          |   |           |          |          |   |          |          |           |   |          |          |           |   |          |           |           |   |          |          |          |   |          |          |           |   |          |          |          |
| C                                                                                                                                                                                                                                                                                                                                                                                                                                                                                                                                                                                                                                                                                                                                                                                                                                                                                                                                                                                                                                                                                                                                                                                                                                                                                                                                                                                                                                                                                                                                                                                                                                                                                                                                                                                                                                                                                                                                                                                                                                                                                                                                                                                                                                                                                                                                                                                                                                                                   | -2.358322                                                                         | 3.418408                                                                           | -0.303671 |                         |  |  |   |          |          |           |   |           |          |           |   |           |          |           |   |           |           |           |   |           |          |           |   |           |          |           |   |           |          |           |   |           |          |           |   |           |          |           |   |           |          |           |   |           |          |           |   |           |          |           |   |           |          |           |   |           |          |           |   |           |          |           |   |           |          |           |   |           |          |           |   |           |          |          |   |           |          |          |   |           |          |          |   |           |          |          |   |           |          |           |   |           |          |           |   |           |          |          |   |           |          |          |   |          |          |           |   |          |          |           |   |          |           |           |   |          |          |          |   |          |          |           |   |          |          |          |
| H                                                                                                                                                                                                                                                                                                                                                                                                                                                                                                                                                                                                                                                                                                                                                                                                                                                                                                                                                                                                                                                                                                                                                                                                                                                                                                                                                                                                                                                                                                                                                                                                                                                                                                                                                                                                                                                                                                                                                                                                                                                                                                                                                                                                                                                                                                                                                                                                                                                                   | -3.102188                                                                         | 2.752728                                                                           | -0.758487 |                         |  |  |   |          |          |           |   |           |          |           |   |           |          |           |   |           |           |           |   |           |          |           |   |           |          |           |   |           |          |           |   |           |          |           |   |           |          |           |   |           |          |           |   |           |          |           |   |           |          |           |   |           |          |           |   |           |          |           |   |           |          |           |   |           |          |           |   |           |          |           |   |           |          |          |   |           |          |          |   |           |          |          |   |           |          |          |   |           |          |           |   |           |          |           |   |           |          |          |   |           |          |          |   |          |          |           |   |          |          |           |   |          |           |           |   |          |          |          |   |          |          |           |   |          |          |          |
| C                                                                                                                                                                                                                                                                                                                                                                                                                                                                                                                                                                                                                                                                                                                                                                                                                                                                                                                                                                                                                                                                                                                                                                                                                                                                                                                                                                                                                                                                                                                                                                                                                                                                                                                                                                                                                                                                                                                                                                                                                                                                                                                                                                                                                                                                                                                                                                                                                                                                   | -2.141616                                                                         | 2.966028                                                                           | 1.149785  |                         |  |  |   |          |          |           |   |           |          |           |   |           |          |           |   |           |           |           |   |           |          |           |   |           |          |           |   |           |          |           |   |           |          |           |   |           |          |           |   |           |          |           |   |           |          |           |   |           |          |           |   |           |          |           |   |           |          |           |   |           |          |           |   |           |          |           |   |           |          |           |   |           |          |          |   |           |          |          |   |           |          |          |   |           |          |          |   |           |          |           |   |           |          |           |   |           |          |          |   |           |          |          |   |          |          |           |   |          |          |           |   |          |           |           |   |          |          |          |   |          |          |           |   |          |          |          |
| H                                                                                                                                                                                                                                                                                                                                                                                                                                                                                                                                                                                                                                                                                                                                                                                                                                                                                                                                                                                                                                                                                                                                                                                                                                                                                                                                                                                                                                                                                                                                                                                                                                                                                                                                                                                                                                                                                                                                                                                                                                                                                                                                                                                                                                                                                                                                                                                                                                                                   | -1.395932                                                                         | 3.597029                                                                           | 1.648853  |                         |  |  |   |          |          |           |   |           |          |           |   |           |          |           |   |           |           |           |   |           |          |           |   |           |          |           |   |           |          |           |   |           |          |           |   |           |          |           |   |           |          |           |   |           |          |           |   |           |          |           |   |           |          |           |   |           |          |           |   |           |          |           |   |           |          |           |   |           |          |           |   |           |          |          |   |           |          |          |   |           |          |          |   |           |          |          |   |           |          |           |   |           |          |           |   |           |          |          |   |           |          |          |   |          |          |           |   |          |          |           |   |          |           |           |   |          |          |          |   |          |          |           |   |          |          |          |
| H                                                                                                                                                                                                                                                                                                                                                                                                                                                                                                                                                                                                                                                                                                                                                                                                                                                                                                                                                                                                                                                                                                                                                                                                                                                                                                                                                                                                                                                                                                                                                                                                                                                                                                                                                                                                                                                                                                                                                                                                                                                                                                                                                                                                                                                                                                                                                                                                                                                                   | -3.075552                                                                         | 3.039325                                                                           | 1.716184  |                         |  |  |   |          |          |           |   |           |          |           |   |           |          |           |   |           |           |           |   |           |          |           |   |           |          |           |   |           |          |           |   |           |          |           |   |           |          |           |   |           |          |           |   |           |          |           |   |           |          |           |   |           |          |           |   |           |          |           |   |           |          |           |   |           |          |           |   |           |          |           |   |           |          |          |   |           |          |          |   |           |          |          |   |           |          |          |   |           |          |           |   |           |          |           |   |           |          |          |   |           |          |          |   |          |          |           |   |          |          |           |   |          |           |           |   |          |          |          |   |          |          |           |   |          |          |          |
| H                                                                                                                                                                                                                                                                                                                                                                                                                                                                                                                                                                                                                                                                                                                                                                                                                                                                                                                                                                                                                                                                                                                                                                                                                                                                                                                                                                                                                                                                                                                                                                                                                                                                                                                                                                                                                                                                                                                                                                                                                                                                                                                                                                                                                                                                                                                                                                                                                                                                   | -1.797567                                                                         | 1.929123                                                                           | 1.198001  |                         |  |  |   |          |          |           |   |           |          |           |   |           |          |           |   |           |           |           |   |           |          |           |   |           |          |           |   |           |          |           |   |           |          |           |   |           |          |           |   |           |          |           |   |           |          |           |   |           |          |           |   |           |          |           |   |           |          |           |   |           |          |           |   |           |          |           |   |           |          |           |   |           |          |          |   |           |          |          |   |           |          |          |   |           |          |          |   |           |          |           |   |           |          |           |   |           |          |          |   |           |          |          |   |          |          |           |   |          |          |           |   |          |           |           |   |          |          |          |   |          |          |           |   |          |          |          |
| C                                                                                                                                                                                                                                                                                                                                                                                                                                                                                                                                                                                                                                                                                                                                                                                                                                                                                                                                                                                                                                                                                                                                                                                                                                                                                                                                                                                                                                                                                                                                                                                                                                                                                                                                                                                                                                                                                                                                                                                                                                                                                                                                                                                                                                                                                                                                                                                                                                                                   | -2.918285                                                                         | 4.859806                                                                           | -0.341815 |                         |  |  |   |          |          |           |   |           |          |           |   |           |          |           |   |           |           |           |   |           |          |           |   |           |          |           |   |           |          |           |   |           |          |           |   |           |          |           |   |           |          |           |   |           |          |           |   |           |          |           |   |           |          |           |   |           |          |           |   |           |          |           |   |           |          |           |   |           |          |           |   |           |          |          |   |           |          |          |   |           |          |          |   |           |          |          |   |           |          |           |   |           |          |           |   |           |          |          |   |           |          |          |   |          |          |           |   |          |          |           |   |          |           |           |   |          |          |          |   |          |          |           |   |          |          |          |
| H                                                                                                                                                                                                                                                                                                                                                                                                                                                                                                                                                                                                                                                                                                                                                                                                                                                                                                                                                                                                                                                                                                                                                                                                                                                                                                                                                                                                                                                                                                                                                                                                                                                                                                                                                                                                                                                                                                                                                                                                                                                                                                                                                                                                                                                                                                                                                                                                                                                                   | -3.146274                                                                         | 5.190847                                                                           | -1.359667 |                         |  |  |   |          |          |           |   |           |          |           |   |           |          |           |   |           |           |           |   |           |          |           |   |           |          |           |   |           |          |           |   |           |          |           |   |           |          |           |   |           |          |           |   |           |          |           |   |           |          |           |   |           |          |           |   |           |          |           |   |           |          |           |   |           |          |           |   |           |          |           |   |           |          |          |   |           |          |          |   |           |          |          |   |           |          |          |   |           |          |           |   |           |          |           |   |           |          |          |   |           |          |          |   |          |          |           |   |          |          |           |   |          |           |           |   |          |          |          |   |          |          |           |   |          |          |          |
| H                                                                                                                                                                                                                                                                                                                                                                                                                                                                                                                                                                                                                                                                                                                                                                                                                                                                                                                                                                                                                                                                                                                                                                                                                                                                                                                                                                                                                                                                                                                                                                                                                                                                                                                                                                                                                                                                                                                                                                                                                                                                                                                                                                                                                                                                                                                                                                                                                                                                   | -3.844820                                                                         | 4.910808                                                                           | 0.239943  |                         |  |  |   |          |          |           |   |           |          |           |   |           |          |           |   |           |           |           |   |           |          |           |   |           |          |           |   |           |          |           |   |           |          |           |   |           |          |           |   |           |          |           |   |           |          |           |   |           |          |           |   |           |          |           |   |           |          |           |   |           |          |           |   |           |          |           |   |           |          |           |   |           |          |          |   |           |          |          |   |           |          |          |   |           |          |          |   |           |          |           |   |           |          |           |   |           |          |          |   |           |          |          |   |          |          |           |   |          |          |           |   |          |           |           |   |          |          |          |   |          |          |           |   |          |          |          |
| H                                                                                                                                                                                                                                                                                                                                                                                                                                                                                                                                                                                                                                                                                                                                                                                                                                                                                                                                                                                                                                                                                                                                                                                                                                                                                                                                                                                                                                                                                                                                                                                                                                                                                                                                                                                                                                                                                                                                                                                                                                                                                                                                                                                                                                                                                                                                                                                                                                                                   | -2.206104                                                                         | 5.568584                                                                           | 0.096977  |                         |  |  |   |          |          |           |   |           |          |           |   |           |          |           |   |           |           |           |   |           |          |           |   |           |          |           |   |           |          |           |   |           |          |           |   |           |          |           |   |           |          |           |   |           |          |           |   |           |          |           |   |           |          |           |   |           |          |           |   |           |          |           |   |           |          |           |   |           |          |           |   |           |          |          |   |           |          |          |   |           |          |          |   |           |          |          |   |           |          |           |   |           |          |           |   |           |          |          |   |           |          |          |   |          |          |           |   |          |          |           |   |          |           |           |   |          |          |          |   |          |          |           |   |          |          |          |
| C                                                                                                                                                                                                                                                                                                                                                                                                                                                                                                                                                                                                                                                                                                                                                                                                                                                                                                                                                                                                                                                                                                                                                                                                                                                                                                                                                                                                                                                                                                                                                                                                                                                                                                                                                                                                                                                                                                                                                                                                                                                                                                                                                                                                                                                                                                                                                                                                                                                                   | 1.299516                                                                          | 0.913876                                                                           | -1.272969 |                         |  |  |   |          |          |           |   |           |          |           |   |           |          |           |   |           |           |           |   |           |          |           |   |           |          |           |   |           |          |           |   |           |          |           |   |           |          |           |   |           |          |           |   |           |          |           |   |           |          |           |   |           |          |           |   |           |          |           |   |           |          |           |   |           |          |           |   |           |          |           |   |           |          |          |   |           |          |          |   |           |          |          |   |           |          |          |   |           |          |           |   |           |          |           |   |           |          |          |   |           |          |          |   |          |          |           |   |          |          |           |   |          |           |           |   |          |          |          |   |          |          |           |   |          |          |          |
| H                                                                                                                                                                                                                                                                                                                                                                                                                                                                                                                                                                                                                                                                                                                                                                                                                                                                                                                                                                                                                                                                                                                                                                                                                                                                                                                                                                                                                                                                                                                                                                                                                                                                                                                                                                                                                                                                                                                                                                                                                                                                                                                                                                                                                                                                                                                                                                                                                                                                   | 1.565870                                                                          | 1.719026                                                                           | -1.968904 |                         |  |  |   |          |          |           |   |           |          |           |   |           |          |           |   |           |           |           |   |           |          |           |   |           |          |           |   |           |          |           |   |           |          |           |   |           |          |           |   |           |          |           |   |           |          |           |   |           |          |           |   |           |          |           |   |           |          |           |   |           |          |           |   |           |          |           |   |           |          |           |   |           |          |          |   |           |          |          |   |           |          |          |   |           |          |          |   |           |          |           |   |           |          |           |   |           |          |          |   |           |          |          |   |          |          |           |   |          |          |           |   |          |           |           |   |          |          |          |   |          |          |           |   |          |          |          |
| H                                                                                                                                                                                                                                                                                                                                                                                                                                                                                                                                                                                                                                                                                                                                                                                                                                                                                                                                                                                                                                                                                                                                                                                                                                                                                                                                                                                                                                                                                                                                                                                                                                                                                                                                                                                                                                                                                                                                                                                                                                                                                                                                                                                                                                                                                                                                                                                                                                                                   | 1.608656                                                                          | -0.036154                                                                          | -1.719933 |                         |  |  |   |          |          |           |   |           |          |           |   |           |          |           |   |           |           |           |   |           |          |           |   |           |          |           |   |           |          |           |   |           |          |           |   |           |          |           |   |           |          |           |   |           |          |           |   |           |          |           |   |           |          |           |   |           |          |           |   |           |          |           |   |           |          |           |   |           |          |           |   |           |          |          |   |           |          |          |   |           |          |          |   |           |          |          |   |           |          |           |   |           |          |           |   |           |          |          |   |           |          |          |   |          |          |           |   |          |          |           |   |          |           |           |   |          |          |          |   |          |          |           |   |          |          |          |
| F                                                                                                                                                                                                                                                                                                                                                                                                                                                                                                                                                                                                                                                                                                                                                                                                                                                                                                                                                                                                                                                                                                                                                                                                                                                                                                                                                                                                                                                                                                                                                                                                                                                                                                                                                                                                                                                                                                                                                                                                                                                                                                                                                                                                                                                                                                                                                                                                                                                                   | 1.788758                                                                          | 2.269191                                                                           | 0.631756  |                         |  |  |   |          |          |           |   |           |          |           |   |           |          |           |   |           |           |           |   |           |          |           |   |           |          |           |   |           |          |           |   |           |          |           |   |           |          |           |   |           |          |           |   |           |          |           |   |           |          |           |   |           |          |           |   |           |          |           |   |           |          |           |   |           |          |           |   |           |          |           |   |           |          |          |   |           |          |          |   |           |          |          |   |           |          |          |   |           |          |           |   |           |          |           |   |           |          |          |   |           |          |          |   |          |          |           |   |          |          |           |   |          |           |           |   |          |          |          |   |          |          |           |   |          |          |          |
| F                                                                                                                                                                                                                                                                                                                                                                                                                                                                                                                                                                                                                                                                                                                                                                                                                                                                                                                                                                                                                                                                                                                                                                                                                                                                                                                                                                                                                                                                                                                                                                                                                                                                                                                                                                                                                                                                                                                                                                                                                                                                                                                                                                                                                                                                                                                                                                                                                                                                   | 3.430752                                                                          | 1.173715                                                                           | -0.301661 |                         |  |  |   |          |          |           |   |           |          |           |   |           |          |           |   |           |           |           |   |           |          |           |   |           |          |           |   |           |          |           |   |           |          |           |   |           |          |           |   |           |          |           |   |           |          |           |   |           |          |           |   |           |          |           |   |           |          |           |   |           |          |           |   |           |          |           |   |           |          |           |   |           |          |          |   |           |          |          |   |           |          |          |   |           |          |          |   |           |          |           |   |           |          |           |   |           |          |          |   |           |          |          |   |          |          |           |   |          |          |           |   |          |           |           |   |          |          |          |   |          |          |           |   |          |          |          |
| F                                                                                                                                                                                                                                                                                                                                                                                                                                                                                                                                                                                                                                                                                                                                                                                                                                                                                                                                                                                                                                                                                                                                                                                                                                                                                                                                                                                                                                                                                                                                                                                                                                                                                                                                                                                                                                                                                                                                                                                                                                                                                                                                                                                                                                                                                                                                                                                                                                                                   | 1.940378                                                                          | 0.110446                                                                           | 0.885905  |                         |  |  |   |          |          |           |   |           |          |           |   |           |          |           |   |           |           |           |   |           |          |           |   |           |          |           |   |           |          |           |   |           |          |           |   |           |          |           |   |           |          |           |   |           |          |           |   |           |          |           |   |           |          |           |   |           |          |           |   |           |          |           |   |           |          |           |   |           |          |           |   |           |          |          |   |           |          |          |   |           |          |          |   |           |          |          |   |           |          |           |   |           |          |           |   |           |          |          |   |           |          |          |   |          |          |           |   |          |          |           |   |          |           |           |   |          |          |          |   |          |          |           |   |          |          |          |

| 3                                                                                                                                                                                                                                                                                                                                                                                                                                                                                                                                                                                                                                                                                                                                                                                                                                                                                                                                                                                                                                                                                                                                                                                                                                                                                                                                                                                                                                                                                                                                                                                                                                                                                                                                                                                                                                                                                                                                                                                                                                                                                                                                                                                                                                                                                                                                                                                                                                                                       | 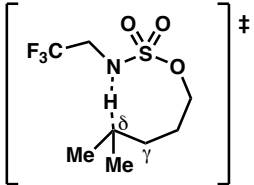 |  |           |                         |  |  |   |          |          |           |   |           |          |          |   |           |           |           |   |           |           |           |   |           |           |           |   |           |          |           |   |           |           |           |   |           |           |          |   |           |          |           |   |           |          |           |   |           |          |          |   |           |          |          |   |           |          |          |   |           |          |          |   |           |          |           |   |           |          |           |   |           |          |           |   |           |          |           |   |           |          |           |   |           |          |           |   |           |          |          |   |           |          |          |   |           |          |          |   |           |          |           |   |           |          |          |   |           |          |          |   |           |           |          |   |          |           |           |   |          |          |          |   |          |          |           |   |           |           |           |
|-------------------------------------------------------------------------------------------------------------------------------------------------------------------------------------------------------------------------------------------------------------------------------------------------------------------------------------------------------------------------------------------------------------------------------------------------------------------------------------------------------------------------------------------------------------------------------------------------------------------------------------------------------------------------------------------------------------------------------------------------------------------------------------------------------------------------------------------------------------------------------------------------------------------------------------------------------------------------------------------------------------------------------------------------------------------------------------------------------------------------------------------------------------------------------------------------------------------------------------------------------------------------------------------------------------------------------------------------------------------------------------------------------------------------------------------------------------------------------------------------------------------------------------------------------------------------------------------------------------------------------------------------------------------------------------------------------------------------------------------------------------------------------------------------------------------------------------------------------------------------------------------------------------------------------------------------------------------------------------------------------------------------------------------------------------------------------------------------------------------------------------------------------------------------------------------------------------------------------------------------------------------------------------------------------------------------------------------------------------------------------------------------------------------------------------------------------------------------|-----------------------------------------------------------------------------------|------------------------------------------------------------------------------------|-----------|-------------------------|--|--|---|----------|----------|-----------|---|-----------|----------|----------|---|-----------|-----------|-----------|---|-----------|-----------|-----------|---|-----------|-----------|-----------|---|-----------|----------|-----------|---|-----------|-----------|-----------|---|-----------|-----------|----------|---|-----------|----------|-----------|---|-----------|----------|-----------|---|-----------|----------|----------|---|-----------|----------|----------|---|-----------|----------|----------|---|-----------|----------|----------|---|-----------|----------|-----------|---|-----------|----------|-----------|---|-----------|----------|-----------|---|-----------|----------|-----------|---|-----------|----------|-----------|---|-----------|----------|-----------|---|-----------|----------|----------|---|-----------|----------|----------|---|-----------|----------|----------|---|-----------|----------|-----------|---|-----------|----------|----------|---|-----------|----------|----------|---|-----------|-----------|----------|---|----------|-----------|-----------|---|----------|----------|----------|---|----------|----------|-----------|---|-----------|-----------|-----------|
| <table border="0" style="width: 100%; text-align: center;"> <thead> <tr> <th style="text-align: left;">Atom</th> <th colspan="3">Coordinates (Angstroms)</th> </tr> <tr> <th></th> <th>X</th> <th>Y</th> <th>Z</th> </tr> </thead> </table>                                                                                                                                                                                                                                                                                                                                                                                                                                                                                                                                                                                                                                                                                                                                                                                                                                                                                                                                                                                                                                                                                                                                                                                                                                                                                                                                                                                                                                                                                                                                                                                                                                                                                                                                                                                                                                                                                                                                                                                                                                                                                                                                                                                                                             |                                                                                   |                                                                                    | Atom      | Coordinates (Angstroms) |  |  |   | X        | Y        | Z         |   |           |          |          |   |           |           |           |   |           |           |           |   |           |           |           |   |           |          |           |   |           |           |           |   |           |           |          |   |           |          |           |   |           |          |           |   |           |          |          |   |           |          |          |   |           |          |          |   |           |          |          |   |           |          |           |   |           |          |           |   |           |          |           |   |           |          |           |   |           |          |           |   |           |          |           |   |           |          |          |   |           |          |          |   |           |          |          |   |           |          |           |   |           |          |          |   |           |          |          |   |           |           |          |   |          |           |           |   |          |          |          |   |          |          |           |   |           |           |           |
| Atom                                                                                                                                                                                                                                                                                                                                                                                                                                                                                                                                                                                                                                                                                                                                                                                                                                                                                                                                                                                                                                                                                                                                                                                                                                                                                                                                                                                                                                                                                                                                                                                                                                                                                                                                                                                                                                                                                                                                                                                                                                                                                                                                                                                                                                                                                                                                                                                                                                                                    | Coordinates (Angstroms)                                                           |                                                                                    |           |                         |  |  |   |          |          |           |   |           |          |          |   |           |           |           |   |           |           |           |   |           |           |           |   |           |          |           |   |           |           |           |   |           |           |          |   |           |          |           |   |           |          |           |   |           |          |          |   |           |          |          |   |           |          |          |   |           |          |          |   |           |          |           |   |           |          |           |   |           |          |           |   |           |          |           |   |           |          |           |   |           |          |           |   |           |          |          |   |           |          |          |   |           |          |          |   |           |          |           |   |           |          |          |   |           |          |          |   |           |           |          |   |          |           |           |   |          |          |          |   |          |          |           |   |           |           |           |
|                                                                                                                                                                                                                                                                                                                                                                                                                                                                                                                                                                                                                                                                                                                                                                                                                                                                                                                                                                                                                                                                                                                                                                                                                                                                                                                                                                                                                                                                                                                                                                                                                                                                                                                                                                                                                                                                                                                                                                                                                                                                                                                                                                                                                                                                                                                                                                                                                                                                         | X                                                                                 | Y                                                                                  | Z         |                         |  |  |   |          |          |           |   |           |          |          |   |           |           |           |   |           |           |           |   |           |           |           |   |           |          |           |   |           |           |           |   |           |           |          |   |           |          |           |   |           |          |           |   |           |          |          |   |           |          |          |   |           |          |          |   |           |          |          |   |           |          |           |   |           |          |           |   |           |          |           |   |           |          |           |   |           |          |           |   |           |          |           |   |           |          |          |   |           |          |          |   |           |          |          |   |           |          |           |   |           |          |          |   |           |          |          |   |           |           |          |   |          |           |           |   |          |          |          |   |          |          |           |   |           |           |           |
| <table border="0" style="width: 100%; text-align: center;"> <tbody> <tr><td colspan="4">-----</td></tr> <tr><td>C</td><td>0.294770</td><td>0.502812</td><td>-0.115482</td></tr> <tr><td>N</td><td>-2.242278</td><td>0.351530</td><td>0.279293</td></tr> <tr><td>S</td><td>-2.774940</td><td>-0.729289</td><td>-0.888166</td></tr> <tr><td>O</td><td>-2.889561</td><td>-2.025443</td><td>-0.210259</td></tr> <tr><td>O</td><td>-2.113036</td><td>-0.653265</td><td>-2.185369</td></tr> <tr><td>C</td><td>-5.169724</td><td>0.167854</td><td>-0.060299</td></tr> <tr><td>H</td><td>-6.033853</td><td>-0.463758</td><td>-0.278114</td></tr> <tr><td>H</td><td>-4.723197</td><td>-0.147618</td><td>0.885163</td></tr> <tr><td>C</td><td>-5.550098</td><td>1.643297</td><td>-0.060603</td></tr> <tr><td>H</td><td>-5.864379</td><td>1.922536</td><td>-1.072703</td></tr> <tr><td>H</td><td>-6.444469</td><td>1.733071</td><td>0.569643</td></tr> <tr><td>C</td><td>-4.496734</td><td>2.627352</td><td>0.481292</td></tr> <tr><td>H</td><td>-4.964101</td><td>3.624282</td><td>0.518961</td></tr> <tr><td>H</td><td>-4.268939</td><td>2.366853</td><td>1.523107</td></tr> <tr><td>C</td><td>-3.171628</td><td>2.796905</td><td>-0.276100</td></tr> <tr><td>H</td><td>-2.629294</td><td>1.696856</td><td>-0.131240</td></tr> <tr><td>C</td><td>-3.282429</td><td>3.045128</td><td>-1.773064</td></tr> <tr><td>H</td><td>-3.831353</td><td>2.254227</td><td>-2.287715</td></tr> <tr><td>H</td><td>-2.292756</td><td>3.128045</td><td>-2.231535</td></tr> <tr><td>H</td><td>-3.810566</td><td>3.994567</td><td>-1.947050</td></tr> <tr><td>C</td><td>-2.238959</td><td>3.777213</td><td>0.427740</td></tr> <tr><td>H</td><td>-2.113909</td><td>3.534262</td><td>1.488527</td></tr> <tr><td>H</td><td>-2.661288</td><td>4.790916</td><td>0.372131</td></tr> <tr><td>H</td><td>-1.253368</td><td>3.804955</td><td>-0.045020</td></tr> <tr><td>C</td><td>-0.897357</td><td>0.246479</td><td>0.813059</td></tr> <tr><td>H</td><td>-0.821158</td><td>0.973706</td><td>1.625953</td></tr> <tr><td>H</td><td>-0.758553</td><td>-0.751059</td><td>1.249742</td></tr> <tr><td>F</td><td>0.546063</td><td>-0.517404</td><td>-0.958517</td></tr> <tr><td>F</td><td>1.411738</td><td>0.679234</td><td>0.641020</td></tr> <tr><td>F</td><td>0.135847</td><td>1.621829</td><td>-0.861078</td></tr> <tr><td>O</td><td>-4.225038</td><td>-0.075930</td><td>-1.157701</td></tr> </tbody> </table> |                                                                                   |                                                                                    | -----     |                         |  |  | C | 0.294770 | 0.502812 | -0.115482 | N | -2.242278 | 0.351530 | 0.279293 | S | -2.774940 | -0.729289 | -0.888166 | O | -2.889561 | -2.025443 | -0.210259 | O | -2.113036 | -0.653265 | -2.185369 | C | -5.169724 | 0.167854 | -0.060299 | H | -6.033853 | -0.463758 | -0.278114 | H | -4.723197 | -0.147618 | 0.885163 | C | -5.550098 | 1.643297 | -0.060603 | H | -5.864379 | 1.922536 | -1.072703 | H | -6.444469 | 1.733071 | 0.569643 | C | -4.496734 | 2.627352 | 0.481292 | H | -4.964101 | 3.624282 | 0.518961 | H | -4.268939 | 2.366853 | 1.523107 | C | -3.171628 | 2.796905 | -0.276100 | H | -2.629294 | 1.696856 | -0.131240 | C | -3.282429 | 3.045128 | -1.773064 | H | -3.831353 | 2.254227 | -2.287715 | H | -2.292756 | 3.128045 | -2.231535 | H | -3.810566 | 3.994567 | -1.947050 | C | -2.238959 | 3.777213 | 0.427740 | H | -2.113909 | 3.534262 | 1.488527 | H | -2.661288 | 4.790916 | 0.372131 | H | -1.253368 | 3.804955 | -0.045020 | C | -0.897357 | 0.246479 | 0.813059 | H | -0.821158 | 0.973706 | 1.625953 | H | -0.758553 | -0.751059 | 1.249742 | F | 0.546063 | -0.517404 | -0.958517 | F | 1.411738 | 0.679234 | 0.641020 | F | 0.135847 | 1.621829 | -0.861078 | O | -4.225038 | -0.075930 | -1.157701 |
| -----                                                                                                                                                                                                                                                                                                                                                                                                                                                                                                                                                                                                                                                                                                                                                                                                                                                                                                                                                                                                                                                                                                                                                                                                                                                                                                                                                                                                                                                                                                                                                                                                                                                                                                                                                                                                                                                                                                                                                                                                                                                                                                                                                                                                                                                                                                                                                                                                                                                                   |                                                                                   |                                                                                    |           |                         |  |  |   |          |          |           |   |           |          |          |   |           |           |           |   |           |           |           |   |           |           |           |   |           |          |           |   |           |           |           |   |           |           |          |   |           |          |           |   |           |          |           |   |           |          |          |   |           |          |          |   |           |          |          |   |           |          |          |   |           |          |           |   |           |          |           |   |           |          |           |   |           |          |           |   |           |          |           |   |           |          |           |   |           |          |          |   |           |          |          |   |           |          |          |   |           |          |           |   |           |          |          |   |           |          |          |   |           |           |          |   |          |           |           |   |          |          |          |   |          |          |           |   |           |           |           |
| C                                                                                                                                                                                                                                                                                                                                                                                                                                                                                                                                                                                                                                                                                                                                                                                                                                                                                                                                                                                                                                                                                                                                                                                                                                                                                                                                                                                                                                                                                                                                                                                                                                                                                                                                                                                                                                                                                                                                                                                                                                                                                                                                                                                                                                                                                                                                                                                                                                                                       | 0.294770                                                                          | 0.502812                                                                           | -0.115482 |                         |  |  |   |          |          |           |   |           |          |          |   |           |           |           |   |           |           |           |   |           |           |           |   |           |          |           |   |           |           |           |   |           |           |          |   |           |          |           |   |           |          |           |   |           |          |          |   |           |          |          |   |           |          |          |   |           |          |          |   |           |          |           |   |           |          |           |   |           |          |           |   |           |          |           |   |           |          |           |   |           |          |           |   |           |          |          |   |           |          |          |   |           |          |          |   |           |          |           |   |           |          |          |   |           |          |          |   |           |           |          |   |          |           |           |   |          |          |          |   |          |          |           |   |           |           |           |
| N                                                                                                                                                                                                                                                                                                                                                                                                                                                                                                                                                                                                                                                                                                                                                                                                                                                                                                                                                                                                                                                                                                                                                                                                                                                                                                                                                                                                                                                                                                                                                                                                                                                                                                                                                                                                                                                                                                                                                                                                                                                                                                                                                                                                                                                                                                                                                                                                                                                                       | -2.242278                                                                         | 0.351530                                                                           | 0.279293  |                         |  |  |   |          |          |           |   |           |          |          |   |           |           |           |   |           |           |           |   |           |           |           |   |           |          |           |   |           |           |           |   |           |           |          |   |           |          |           |   |           |          |           |   |           |          |          |   |           |          |          |   |           |          |          |   |           |          |          |   |           |          |           |   |           |          |           |   |           |          |           |   |           |          |           |   |           |          |           |   |           |          |           |   |           |          |          |   |           |          |          |   |           |          |          |   |           |          |           |   |           |          |          |   |           |          |          |   |           |           |          |   |          |           |           |   |          |          |          |   |          |          |           |   |           |           |           |
| S                                                                                                                                                                                                                                                                                                                                                                                                                                                                                                                                                                                                                                                                                                                                                                                                                                                                                                                                                                                                                                                                                                                                                                                                                                                                                                                                                                                                                                                                                                                                                                                                                                                                                                                                                                                                                                                                                                                                                                                                                                                                                                                                                                                                                                                                                                                                                                                                                                                                       | -2.774940                                                                         | -0.729289                                                                          | -0.888166 |                         |  |  |   |          |          |           |   |           |          |          |   |           |           |           |   |           |           |           |   |           |           |           |   |           |          |           |   |           |           |           |   |           |           |          |   |           |          |           |   |           |          |           |   |           |          |          |   |           |          |          |   |           |          |          |   |           |          |          |   |           |          |           |   |           |          |           |   |           |          |           |   |           |          |           |   |           |          |           |   |           |          |           |   |           |          |          |   |           |          |          |   |           |          |          |   |           |          |           |   |           |          |          |   |           |          |          |   |           |           |          |   |          |           |           |   |          |          |          |   |          |          |           |   |           |           |           |
| O                                                                                                                                                                                                                                                                                                                                                                                                                                                                                                                                                                                                                                                                                                                                                                                                                                                                                                                                                                                                                                                                                                                                                                                                                                                                                                                                                                                                                                                                                                                                                                                                                                                                                                                                                                                                                                                                                                                                                                                                                                                                                                                                                                                                                                                                                                                                                                                                                                                                       | -2.889561                                                                         | -2.025443                                                                          | -0.210259 |                         |  |  |   |          |          |           |   |           |          |          |   |           |           |           |   |           |           |           |   |           |           |           |   |           |          |           |   |           |           |           |   |           |           |          |   |           |          |           |   |           |          |           |   |           |          |          |   |           |          |          |   |           |          |          |   |           |          |          |   |           |          |           |   |           |          |           |   |           |          |           |   |           |          |           |   |           |          |           |   |           |          |           |   |           |          |          |   |           |          |          |   |           |          |          |   |           |          |           |   |           |          |          |   |           |          |          |   |           |           |          |   |          |           |           |   |          |          |          |   |          |          |           |   |           |           |           |
| O                                                                                                                                                                                                                                                                                                                                                                                                                                                                                                                                                                                                                                                                                                                                                                                                                                                                                                                                                                                                                                                                                                                                                                                                                                                                                                                                                                                                                                                                                                                                                                                                                                                                                                                                                                                                                                                                                                                                                                                                                                                                                                                                                                                                                                                                                                                                                                                                                                                                       | -2.113036                                                                         | -0.653265                                                                          | -2.185369 |                         |  |  |   |          |          |           |   |           |          |          |   |           |           |           |   |           |           |           |   |           |           |           |   |           |          |           |   |           |           |           |   |           |           |          |   |           |          |           |   |           |          |           |   |           |          |          |   |           |          |          |   |           |          |          |   |           |          |          |   |           |          |           |   |           |          |           |   |           |          |           |   |           |          |           |   |           |          |           |   |           |          |           |   |           |          |          |   |           |          |          |   |           |          |          |   |           |          |           |   |           |          |          |   |           |          |          |   |           |           |          |   |          |           |           |   |          |          |          |   |          |          |           |   |           |           |           |
| C                                                                                                                                                                                                                                                                                                                                                                                                                                                                                                                                                                                                                                                                                                                                                                                                                                                                                                                                                                                                                                                                                                                                                                                                                                                                                                                                                                                                                                                                                                                                                                                                                                                                                                                                                                                                                                                                                                                                                                                                                                                                                                                                                                                                                                                                                                                                                                                                                                                                       | -5.169724                                                                         | 0.167854                                                                           | -0.060299 |                         |  |  |   |          |          |           |   |           |          |          |   |           |           |           |   |           |           |           |   |           |           |           |   |           |          |           |   |           |           |           |   |           |           |          |   |           |          |           |   |           |          |           |   |           |          |          |   |           |          |          |   |           |          |          |   |           |          |          |   |           |          |           |   |           |          |           |   |           |          |           |   |           |          |           |   |           |          |           |   |           |          |           |   |           |          |          |   |           |          |          |   |           |          |          |   |           |          |           |   |           |          |          |   |           |          |          |   |           |           |          |   |          |           |           |   |          |          |          |   |          |          |           |   |           |           |           |
| H                                                                                                                                                                                                                                                                                                                                                                                                                                                                                                                                                                                                                                                                                                                                                                                                                                                                                                                                                                                                                                                                                                                                                                                                                                                                                                                                                                                                                                                                                                                                                                                                                                                                                                                                                                                                                                                                                                                                                                                                                                                                                                                                                                                                                                                                                                                                                                                                                                                                       | -6.033853                                                                         | -0.463758                                                                          | -0.278114 |                         |  |  |   |          |          |           |   |           |          |          |   |           |           |           |   |           |           |           |   |           |           |           |   |           |          |           |   |           |           |           |   |           |           |          |   |           |          |           |   |           |          |           |   |           |          |          |   |           |          |          |   |           |          |          |   |           |          |          |   |           |          |           |   |           |          |           |   |           |          |           |   |           |          |           |   |           |          |           |   |           |          |           |   |           |          |          |   |           |          |          |   |           |          |          |   |           |          |           |   |           |          |          |   |           |          |          |   |           |           |          |   |          |           |           |   |          |          |          |   |          |          |           |   |           |           |           |
| H                                                                                                                                                                                                                                                                                                                                                                                                                                                                                                                                                                                                                                                                                                                                                                                                                                                                                                                                                                                                                                                                                                                                                                                                                                                                                                                                                                                                                                                                                                                                                                                                                                                                                                                                                                                                                                                                                                                                                                                                                                                                                                                                                                                                                                                                                                                                                                                                                                                                       | -4.723197                                                                         | -0.147618                                                                          | 0.885163  |                         |  |  |   |          |          |           |   |           |          |          |   |           |           |           |   |           |           |           |   |           |           |           |   |           |          |           |   |           |           |           |   |           |           |          |   |           |          |           |   |           |          |           |   |           |          |          |   |           |          |          |   |           |          |          |   |           |          |          |   |           |          |           |   |           |          |           |   |           |          |           |   |           |          |           |   |           |          |           |   |           |          |           |   |           |          |          |   |           |          |          |   |           |          |          |   |           |          |           |   |           |          |          |   |           |          |          |   |           |           |          |   |          |           |           |   |          |          |          |   |          |          |           |   |           |           |           |
| C                                                                                                                                                                                                                                                                                                                                                                                                                                                                                                                                                                                                                                                                                                                                                                                                                                                                                                                                                                                                                                                                                                                                                                                                                                                                                                                                                                                                                                                                                                                                                                                                                                                                                                                                                                                                                                                                                                                                                                                                                                                                                                                                                                                                                                                                                                                                                                                                                                                                       | -5.550098                                                                         | 1.643297                                                                           | -0.060603 |                         |  |  |   |          |          |           |   |           |          |          |   |           |           |           |   |           |           |           |   |           |           |           |   |           |          |           |   |           |           |           |   |           |           |          |   |           |          |           |   |           |          |           |   |           |          |          |   |           |          |          |   |           |          |          |   |           |          |          |   |           |          |           |   |           |          |           |   |           |          |           |   |           |          |           |   |           |          |           |   |           |          |           |   |           |          |          |   |           |          |          |   |           |          |          |   |           |          |           |   |           |          |          |   |           |          |          |   |           |           |          |   |          |           |           |   |          |          |          |   |          |          |           |   |           |           |           |
| H                                                                                                                                                                                                                                                                                                                                                                                                                                                                                                                                                                                                                                                                                                                                                                                                                                                                                                                                                                                                                                                                                                                                                                                                                                                                                                                                                                                                                                                                                                                                                                                                                                                                                                                                                                                                                                                                                                                                                                                                                                                                                                                                                                                                                                                                                                                                                                                                                                                                       | -5.864379                                                                         | 1.922536                                                                           | -1.072703 |                         |  |  |   |          |          |           |   |           |          |          |   |           |           |           |   |           |           |           |   |           |           |           |   |           |          |           |   |           |           |           |   |           |           |          |   |           |          |           |   |           |          |           |   |           |          |          |   |           |          |          |   |           |          |          |   |           |          |          |   |           |          |           |   |           |          |           |   |           |          |           |   |           |          |           |   |           |          |           |   |           |          |           |   |           |          |          |   |           |          |          |   |           |          |          |   |           |          |           |   |           |          |          |   |           |          |          |   |           |           |          |   |          |           |           |   |          |          |          |   |          |          |           |   |           |           |           |
| H                                                                                                                                                                                                                                                                                                                                                                                                                                                                                                                                                                                                                                                                                                                                                                                                                                                                                                                                                                                                                                                                                                                                                                                                                                                                                                                                                                                                                                                                                                                                                                                                                                                                                                                                                                                                                                                                                                                                                                                                                                                                                                                                                                                                                                                                                                                                                                                                                                                                       | -6.444469                                                                         | 1.733071                                                                           | 0.569643  |                         |  |  |   |          |          |           |   |           |          |          |   |           |           |           |   |           |           |           |   |           |           |           |   |           |          |           |   |           |           |           |   |           |           |          |   |           |          |           |   |           |          |           |   |           |          |          |   |           |          |          |   |           |          |          |   |           |          |          |   |           |          |           |   |           |          |           |   |           |          |           |   |           |          |           |   |           |          |           |   |           |          |           |   |           |          |          |   |           |          |          |   |           |          |          |   |           |          |           |   |           |          |          |   |           |          |          |   |           |           |          |   |          |           |           |   |          |          |          |   |          |          |           |   |           |           |           |
| C                                                                                                                                                                                                                                                                                                                                                                                                                                                                                                                                                                                                                                                                                                                                                                                                                                                                                                                                                                                                                                                                                                                                                                                                                                                                                                                                                                                                                                                                                                                                                                                                                                                                                                                                                                                                                                                                                                                                                                                                                                                                                                                                                                                                                                                                                                                                                                                                                                                                       | -4.496734                                                                         | 2.627352                                                                           | 0.481292  |                         |  |  |   |          |          |           |   |           |          |          |   |           |           |           |   |           |           |           |   |           |           |           |   |           |          |           |   |           |           |           |   |           |           |          |   |           |          |           |   |           |          |           |   |           |          |          |   |           |          |          |   |           |          |          |   |           |          |          |   |           |          |           |   |           |          |           |   |           |          |           |   |           |          |           |   |           |          |           |   |           |          |           |   |           |          |          |   |           |          |          |   |           |          |          |   |           |          |           |   |           |          |          |   |           |          |          |   |           |           |          |   |          |           |           |   |          |          |          |   |          |          |           |   |           |           |           |
| H                                                                                                                                                                                                                                                                                                                                                                                                                                                                                                                                                                                                                                                                                                                                                                                                                                                                                                                                                                                                                                                                                                                                                                                                                                                                                                                                                                                                                                                                                                                                                                                                                                                                                                                                                                                                                                                                                                                                                                                                                                                                                                                                                                                                                                                                                                                                                                                                                                                                       | -4.964101                                                                         | 3.624282                                                                           | 0.518961  |                         |  |  |   |          |          |           |   |           |          |          |   |           |           |           |   |           |           |           |   |           |           |           |   |           |          |           |   |           |           |           |   |           |           |          |   |           |          |           |   |           |          |           |   |           |          |          |   |           |          |          |   |           |          |          |   |           |          |          |   |           |          |           |   |           |          |           |   |           |          |           |   |           |          |           |   |           |          |           |   |           |          |           |   |           |          |          |   |           |          |          |   |           |          |          |   |           |          |           |   |           |          |          |   |           |          |          |   |           |           |          |   |          |           |           |   |          |          |          |   |          |          |           |   |           |           |           |
| H                                                                                                                                                                                                                                                                                                                                                                                                                                                                                                                                                                                                                                                                                                                                                                                                                                                                                                                                                                                                                                                                                                                                                                                                                                                                                                                                                                                                                                                                                                                                                                                                                                                                                                                                                                                                                                                                                                                                                                                                                                                                                                                                                                                                                                                                                                                                                                                                                                                                       | -4.268939                                                                         | 2.366853                                                                           | 1.523107  |                         |  |  |   |          |          |           |   |           |          |          |   |           |           |           |   |           |           |           |   |           |           |           |   |           |          |           |   |           |           |           |   |           |           |          |   |           |          |           |   |           |          |           |   |           |          |          |   |           |          |          |   |           |          |          |   |           |          |          |   |           |          |           |   |           |          |           |   |           |          |           |   |           |          |           |   |           |          |           |   |           |          |           |   |           |          |          |   |           |          |          |   |           |          |          |   |           |          |           |   |           |          |          |   |           |          |          |   |           |           |          |   |          |           |           |   |          |          |          |   |          |          |           |   |           |           |           |
| C                                                                                                                                                                                                                                                                                                                                                                                                                                                                                                                                                                                                                                                                                                                                                                                                                                                                                                                                                                                                                                                                                                                                                                                                                                                                                                                                                                                                                                                                                                                                                                                                                                                                                                                                                                                                                                                                                                                                                                                                                                                                                                                                                                                                                                                                                                                                                                                                                                                                       | -3.171628                                                                         | 2.796905                                                                           | -0.276100 |                         |  |  |   |          |          |           |   |           |          |          |   |           |           |           |   |           |           |           |   |           |           |           |   |           |          |           |   |           |           |           |   |           |           |          |   |           |          |           |   |           |          |           |   |           |          |          |   |           |          |          |   |           |          |          |   |           |          |          |   |           |          |           |   |           |          |           |   |           |          |           |   |           |          |           |   |           |          |           |   |           |          |           |   |           |          |          |   |           |          |          |   |           |          |          |   |           |          |           |   |           |          |          |   |           |          |          |   |           |           |          |   |          |           |           |   |          |          |          |   |          |          |           |   |           |           |           |
| H                                                                                                                                                                                                                                                                                                                                                                                                                                                                                                                                                                                                                                                                                                                                                                                                                                                                                                                                                                                                                                                                                                                                                                                                                                                                                                                                                                                                                                                                                                                                                                                                                                                                                                                                                                                                                                                                                                                                                                                                                                                                                                                                                                                                                                                                                                                                                                                                                                                                       | -2.629294                                                                         | 1.696856                                                                           | -0.131240 |                         |  |  |   |          |          |           |   |           |          |          |   |           |           |           |   |           |           |           |   |           |           |           |   |           |          |           |   |           |           |           |   |           |           |          |   |           |          |           |   |           |          |           |   |           |          |          |   |           |          |          |   |           |          |          |   |           |          |          |   |           |          |           |   |           |          |           |   |           |          |           |   |           |          |           |   |           |          |           |   |           |          |           |   |           |          |          |   |           |          |          |   |           |          |          |   |           |          |           |   |           |          |          |   |           |          |          |   |           |           |          |   |          |           |           |   |          |          |          |   |          |          |           |   |           |           |           |
| C                                                                                                                                                                                                                                                                                                                                                                                                                                                                                                                                                                                                                                                                                                                                                                                                                                                                                                                                                                                                                                                                                                                                                                                                                                                                                                                                                                                                                                                                                                                                                                                                                                                                                                                                                                                                                                                                                                                                                                                                                                                                                                                                                                                                                                                                                                                                                                                                                                                                       | -3.282429                                                                         | 3.045128                                                                           | -1.773064 |                         |  |  |   |          |          |           |   |           |          |          |   |           |           |           |   |           |           |           |   |           |           |           |   |           |          |           |   |           |           |           |   |           |           |          |   |           |          |           |   |           |          |           |   |           |          |          |   |           |          |          |   |           |          |          |   |           |          |          |   |           |          |           |   |           |          |           |   |           |          |           |   |           |          |           |   |           |          |           |   |           |          |           |   |           |          |          |   |           |          |          |   |           |          |          |   |           |          |           |   |           |          |          |   |           |          |          |   |           |           |          |   |          |           |           |   |          |          |          |   |          |          |           |   |           |           |           |
| H                                                                                                                                                                                                                                                                                                                                                                                                                                                                                                                                                                                                                                                                                                                                                                                                                                                                                                                                                                                                                                                                                                                                                                                                                                                                                                                                                                                                                                                                                                                                                                                                                                                                                                                                                                                                                                                                                                                                                                                                                                                                                                                                                                                                                                                                                                                                                                                                                                                                       | -3.831353                                                                         | 2.254227                                                                           | -2.287715 |                         |  |  |   |          |          |           |   |           |          |          |   |           |           |           |   |           |           |           |   |           |           |           |   |           |          |           |   |           |           |           |   |           |           |          |   |           |          |           |   |           |          |           |   |           |          |          |   |           |          |          |   |           |          |          |   |           |          |          |   |           |          |           |   |           |          |           |   |           |          |           |   |           |          |           |   |           |          |           |   |           |          |           |   |           |          |          |   |           |          |          |   |           |          |          |   |           |          |           |   |           |          |          |   |           |          |          |   |           |           |          |   |          |           |           |   |          |          |          |   |          |          |           |   |           |           |           |
| H                                                                                                                                                                                                                                                                                                                                                                                                                                                                                                                                                                                                                                                                                                                                                                                                                                                                                                                                                                                                                                                                                                                                                                                                                                                                                                                                                                                                                                                                                                                                                                                                                                                                                                                                                                                                                                                                                                                                                                                                                                                                                                                                                                                                                                                                                                                                                                                                                                                                       | -2.292756                                                                         | 3.128045                                                                           | -2.231535 |                         |  |  |   |          |          |           |   |           |          |          |   |           |           |           |   |           |           |           |   |           |           |           |   |           |          |           |   |           |           |           |   |           |           |          |   |           |          |           |   |           |          |           |   |           |          |          |   |           |          |          |   |           |          |          |   |           |          |          |   |           |          |           |   |           |          |           |   |           |          |           |   |           |          |           |   |           |          |           |   |           |          |           |   |           |          |          |   |           |          |          |   |           |          |          |   |           |          |           |   |           |          |          |   |           |          |          |   |           |           |          |   |          |           |           |   |          |          |          |   |          |          |           |   |           |           |           |
| H                                                                                                                                                                                                                                                                                                                                                                                                                                                                                                                                                                                                                                                                                                                                                                                                                                                                                                                                                                                                                                                                                                                                                                                                                                                                                                                                                                                                                                                                                                                                                                                                                                                                                                                                                                                                                                                                                                                                                                                                                                                                                                                                                                                                                                                                                                                                                                                                                                                                       | -3.810566                                                                         | 3.994567                                                                           | -1.947050 |                         |  |  |   |          |          |           |   |           |          |          |   |           |           |           |   |           |           |           |   |           |           |           |   |           |          |           |   |           |           |           |   |           |           |          |   |           |          |           |   |           |          |           |   |           |          |          |   |           |          |          |   |           |          |          |   |           |          |          |   |           |          |           |   |           |          |           |   |           |          |           |   |           |          |           |   |           |          |           |   |           |          |           |   |           |          |          |   |           |          |          |   |           |          |          |   |           |          |           |   |           |          |          |   |           |          |          |   |           |           |          |   |          |           |           |   |          |          |          |   |          |          |           |   |           |           |           |
| C                                                                                                                                                                                                                                                                                                                                                                                                                                                                                                                                                                                                                                                                                                                                                                                                                                                                                                                                                                                                                                                                                                                                                                                                                                                                                                                                                                                                                                                                                                                                                                                                                                                                                                                                                                                                                                                                                                                                                                                                                                                                                                                                                                                                                                                                                                                                                                                                                                                                       | -2.238959                                                                         | 3.777213                                                                           | 0.427740  |                         |  |  |   |          |          |           |   |           |          |          |   |           |           |           |   |           |           |           |   |           |           |           |   |           |          |           |   |           |           |           |   |           |           |          |   |           |          |           |   |           |          |           |   |           |          |          |   |           |          |          |   |           |          |          |   |           |          |          |   |           |          |           |   |           |          |           |   |           |          |           |   |           |          |           |   |           |          |           |   |           |          |           |   |           |          |          |   |           |          |          |   |           |          |          |   |           |          |           |   |           |          |          |   |           |          |          |   |           |           |          |   |          |           |           |   |          |          |          |   |          |          |           |   |           |           |           |
| H                                                                                                                                                                                                                                                                                                                                                                                                                                                                                                                                                                                                                                                                                                                                                                                                                                                                                                                                                                                                                                                                                                                                                                                                                                                                                                                                                                                                                                                                                                                                                                                                                                                                                                                                                                                                                                                                                                                                                                                                                                                                                                                                                                                                                                                                                                                                                                                                                                                                       | -2.113909                                                                         | 3.534262                                                                           | 1.488527  |                         |  |  |   |          |          |           |   |           |          |          |   |           |           |           |   |           |           |           |   |           |           |           |   |           |          |           |   |           |           |           |   |           |           |          |   |           |          |           |   |           |          |           |   |           |          |          |   |           |          |          |   |           |          |          |   |           |          |          |   |           |          |           |   |           |          |           |   |           |          |           |   |           |          |           |   |           |          |           |   |           |          |           |   |           |          |          |   |           |          |          |   |           |          |          |   |           |          |           |   |           |          |          |   |           |          |          |   |           |           |          |   |          |           |           |   |          |          |          |   |          |          |           |   |           |           |           |
| H                                                                                                                                                                                                                                                                                                                                                                                                                                                                                                                                                                                                                                                                                                                                                                                                                                                                                                                                                                                                                                                                                                                                                                                                                                                                                                                                                                                                                                                                                                                                                                                                                                                                                                                                                                                                                                                                                                                                                                                                                                                                                                                                                                                                                                                                                                                                                                                                                                                                       | -2.661288                                                                         | 4.790916                                                                           | 0.372131  |                         |  |  |   |          |          |           |   |           |          |          |   |           |           |           |   |           |           |           |   |           |           |           |   |           |          |           |   |           |           |           |   |           |           |          |   |           |          |           |   |           |          |           |   |           |          |          |   |           |          |          |   |           |          |          |   |           |          |          |   |           |          |           |   |           |          |           |   |           |          |           |   |           |          |           |   |           |          |           |   |           |          |           |   |           |          |          |   |           |          |          |   |           |          |          |   |           |          |           |   |           |          |          |   |           |          |          |   |           |           |          |   |          |           |           |   |          |          |          |   |          |          |           |   |           |           |           |
| H                                                                                                                                                                                                                                                                                                                                                                                                                                                                                                                                                                                                                                                                                                                                                                                                                                                                                                                                                                                                                                                                                                                                                                                                                                                                                                                                                                                                                                                                                                                                                                                                                                                                                                                                                                                                                                                                                                                                                                                                                                                                                                                                                                                                                                                                                                                                                                                                                                                                       | -1.253368                                                                         | 3.804955                                                                           | -0.045020 |                         |  |  |   |          |          |           |   |           |          |          |   |           |           |           |   |           |           |           |   |           |           |           |   |           |          |           |   |           |           |           |   |           |           |          |   |           |          |           |   |           |          |           |   |           |          |          |   |           |          |          |   |           |          |          |   |           |          |          |   |           |          |           |   |           |          |           |   |           |          |           |   |           |          |           |   |           |          |           |   |           |          |           |   |           |          |          |   |           |          |          |   |           |          |          |   |           |          |           |   |           |          |          |   |           |          |          |   |           |           |          |   |          |           |           |   |          |          |          |   |          |          |           |   |           |           |           |
| C                                                                                                                                                                                                                                                                                                                                                                                                                                                                                                                                                                                                                                                                                                                                                                                                                                                                                                                                                                                                                                                                                                                                                                                                                                                                                                                                                                                                                                                                                                                                                                                                                                                                                                                                                                                                                                                                                                                                                                                                                                                                                                                                                                                                                                                                                                                                                                                                                                                                       | -0.897357                                                                         | 0.246479                                                                           | 0.813059  |                         |  |  |   |          |          |           |   |           |          |          |   |           |           |           |   |           |           |           |   |           |           |           |   |           |          |           |   |           |           |           |   |           |           |          |   |           |          |           |   |           |          |           |   |           |          |          |   |           |          |          |   |           |          |          |   |           |          |          |   |           |          |           |   |           |          |           |   |           |          |           |   |           |          |           |   |           |          |           |   |           |          |           |   |           |          |          |   |           |          |          |   |           |          |          |   |           |          |           |   |           |          |          |   |           |          |          |   |           |           |          |   |          |           |           |   |          |          |          |   |          |          |           |   |           |           |           |
| H                                                                                                                                                                                                                                                                                                                                                                                                                                                                                                                                                                                                                                                                                                                                                                                                                                                                                                                                                                                                                                                                                                                                                                                                                                                                                                                                                                                                                                                                                                                                                                                                                                                                                                                                                                                                                                                                                                                                                                                                                                                                                                                                                                                                                                                                                                                                                                                                                                                                       | -0.821158                                                                         | 0.973706                                                                           | 1.625953  |                         |  |  |   |          |          |           |   |           |          |          |   |           |           |           |   |           |           |           |   |           |           |           |   |           |          |           |   |           |           |           |   |           |           |          |   |           |          |           |   |           |          |           |   |           |          |          |   |           |          |          |   |           |          |          |   |           |          |          |   |           |          |           |   |           |          |           |   |           |          |           |   |           |          |           |   |           |          |           |   |           |          |           |   |           |          |          |   |           |          |          |   |           |          |          |   |           |          |           |   |           |          |          |   |           |          |          |   |           |           |          |   |          |           |           |   |          |          |          |   |          |          |           |   |           |           |           |
| H                                                                                                                                                                                                                                                                                                                                                                                                                                                                                                                                                                                                                                                                                                                                                                                                                                                                                                                                                                                                                                                                                                                                                                                                                                                                                                                                                                                                                                                                                                                                                                                                                                                                                                                                                                                                                                                                                                                                                                                                                                                                                                                                                                                                                                                                                                                                                                                                                                                                       | -0.758553                                                                         | -0.751059                                                                          | 1.249742  |                         |  |  |   |          |          |           |   |           |          |          |   |           |           |           |   |           |           |           |   |           |           |           |   |           |          |           |   |           |           |           |   |           |           |          |   |           |          |           |   |           |          |           |   |           |          |          |   |           |          |          |   |           |          |          |   |           |          |          |   |           |          |           |   |           |          |           |   |           |          |           |   |           |          |           |   |           |          |           |   |           |          |           |   |           |          |          |   |           |          |          |   |           |          |          |   |           |          |           |   |           |          |          |   |           |          |          |   |           |           |          |   |          |           |           |   |          |          |          |   |          |          |           |   |           |           |           |
| F                                                                                                                                                                                                                                                                                                                                                                                                                                                                                                                                                                                                                                                                                                                                                                                                                                                                                                                                                                                                                                                                                                                                                                                                                                                                                                                                                                                                                                                                                                                                                                                                                                                                                                                                                                                                                                                                                                                                                                                                                                                                                                                                                                                                                                                                                                                                                                                                                                                                       | 0.546063                                                                          | -0.517404                                                                          | -0.958517 |                         |  |  |   |          |          |           |   |           |          |          |   |           |           |           |   |           |           |           |   |           |           |           |   |           |          |           |   |           |           |           |   |           |           |          |   |           |          |           |   |           |          |           |   |           |          |          |   |           |          |          |   |           |          |          |   |           |          |          |   |           |          |           |   |           |          |           |   |           |          |           |   |           |          |           |   |           |          |           |   |           |          |           |   |           |          |          |   |           |          |          |   |           |          |          |   |           |          |           |   |           |          |          |   |           |          |          |   |           |           |          |   |          |           |           |   |          |          |          |   |          |          |           |   |           |           |           |
| F                                                                                                                                                                                                                                                                                                                                                                                                                                                                                                                                                                                                                                                                                                                                                                                                                                                                                                                                                                                                                                                                                                                                                                                                                                                                                                                                                                                                                                                                                                                                                                                                                                                                                                                                                                                                                                                                                                                                                                                                                                                                                                                                                                                                                                                                                                                                                                                                                                                                       | 1.411738                                                                          | 0.679234                                                                           | 0.641020  |                         |  |  |   |          |          |           |   |           |          |          |   |           |           |           |   |           |           |           |   |           |           |           |   |           |          |           |   |           |           |           |   |           |           |          |   |           |          |           |   |           |          |           |   |           |          |          |   |           |          |          |   |           |          |          |   |           |          |          |   |           |          |           |   |           |          |           |   |           |          |           |   |           |          |           |   |           |          |           |   |           |          |           |   |           |          |          |   |           |          |          |   |           |          |          |   |           |          |           |   |           |          |          |   |           |          |          |   |           |           |          |   |          |           |           |   |          |          |          |   |          |          |           |   |           |           |           |
| F                                                                                                                                                                                                                                                                                                                                                                                                                                                                                                                                                                                                                                                                                                                                                                                                                                                                                                                                                                                                                                                                                                                                                                                                                                                                                                                                                                                                                                                                                                                                                                                                                                                                                                                                                                                                                                                                                                                                                                                                                                                                                                                                                                                                                                                                                                                                                                                                                                                                       | 0.135847                                                                          | 1.621829                                                                           | -0.861078 |                         |  |  |   |          |          |           |   |           |          |          |   |           |           |           |   |           |           |           |   |           |           |           |   |           |          |           |   |           |           |           |   |           |           |          |   |           |          |           |   |           |          |           |   |           |          |          |   |           |          |          |   |           |          |          |   |           |          |          |   |           |          |           |   |           |          |           |   |           |          |           |   |           |          |           |   |           |          |           |   |           |          |           |   |           |          |          |   |           |          |          |   |           |          |          |   |           |          |           |   |           |          |          |   |           |          |          |   |           |           |          |   |          |           |           |   |          |          |          |   |          |          |           |   |           |           |           |
| O                                                                                                                                                                                                                                                                                                                                                                                                                                                                                                                                                                                                                                                                                                                                                                                                                                                                                                                                                                                                                                                                                                                                                                                                                                                                                                                                                                                                                                                                                                                                                                                                                                                                                                                                                                                                                                                                                                                                                                                                                                                                                                                                                                                                                                                                                                                                                                                                                                                                       | -4.225038                                                                         | -0.075930                                                                          | -1.157701 |                         |  |  |   |          |          |           |   |           |          |          |   |           |           |           |   |           |           |           |   |           |           |           |   |           |          |           |   |           |           |           |   |           |           |          |   |           |          |           |   |           |          |           |   |           |          |          |   |           |          |          |   |           |          |          |   |           |          |          |   |           |          |           |   |           |          |           |   |           |          |           |   |           |          |           |   |           |          |           |   |           |          |           |   |           |          |          |   |           |          |          |   |           |          |          |   |           |          |           |   |           |          |          |   |           |          |          |   |           |           |          |   |          |           |           |   |          |          |          |   |          |          |           |   |           |           |           |

| 4                                                                                                                                                                                                                                                                                                                                                                                                                                                                                                                                                                                                                                                                                                                                                                                                                                                                                                                                                                                                                                                                                                                                                                                                                                                                                                                                                                                                                                                                                                                                                                                                                                                                                                                                                                                                                                                                                                                                                                                                                                                                                                                                                                                                                                                                                                                                                                                                                                                                  | 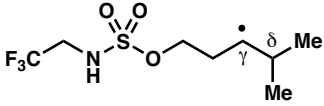 |  |           |                         |  |  |   |           |           |           |   |           |           |          |   |           |           |           |   |           |           |          |   |           |          |          |   |           |          |          |   |           |          |           |   |           |          |           |   |           |          |           |   |           |          |          |   |           |          |          |   |           |          |          |   |           |           |           |   |           |          |          |   |           |          |          |   |           |          |           |   |           |          |           |   |           |          |           |   |           |          |          |   |           |          |          |   |           |          |          |   |           |          |          |   |           |          |          |   |           |          |           |   |          |           |           |   |          |           |           |   |          |           |          |   |          |          |           |   |          |          |           |   |          |          |           |   |          |          |           |
|--------------------------------------------------------------------------------------------------------------------------------------------------------------------------------------------------------------------------------------------------------------------------------------------------------------------------------------------------------------------------------------------------------------------------------------------------------------------------------------------------------------------------------------------------------------------------------------------------------------------------------------------------------------------------------------------------------------------------------------------------------------------------------------------------------------------------------------------------------------------------------------------------------------------------------------------------------------------------------------------------------------------------------------------------------------------------------------------------------------------------------------------------------------------------------------------------------------------------------------------------------------------------------------------------------------------------------------------------------------------------------------------------------------------------------------------------------------------------------------------------------------------------------------------------------------------------------------------------------------------------------------------------------------------------------------------------------------------------------------------------------------------------------------------------------------------------------------------------------------------------------------------------------------------------------------------------------------------------------------------------------------------------------------------------------------------------------------------------------------------------------------------------------------------------------------------------------------------------------------------------------------------------------------------------------------------------------------------------------------------------------------------------------------------------------------------------------------------|-----------------------------------------------------------------------------------|------------------------------------------------------------------------------------|-----------|-------------------------|--|--|---|-----------|-----------|-----------|---|-----------|-----------|----------|---|-----------|-----------|-----------|---|-----------|-----------|----------|---|-----------|----------|----------|---|-----------|----------|----------|---|-----------|----------|-----------|---|-----------|----------|-----------|---|-----------|----------|-----------|---|-----------|----------|----------|---|-----------|----------|----------|---|-----------|----------|----------|---|-----------|-----------|-----------|---|-----------|----------|----------|---|-----------|----------|----------|---|-----------|----------|-----------|---|-----------|----------|-----------|---|-----------|----------|-----------|---|-----------|----------|----------|---|-----------|----------|----------|---|-----------|----------|----------|---|-----------|----------|----------|---|-----------|----------|----------|---|-----------|----------|-----------|---|----------|-----------|-----------|---|----------|-----------|-----------|---|----------|-----------|----------|---|----------|----------|-----------|---|----------|----------|-----------|---|----------|----------|-----------|---|----------|----------|-----------|
| <table border="0" style="width: 100%; text-align: center;"> <thead> <tr> <th style="text-align: left;">Atom</th> <th colspan="3">Coordinates (Angstroms)</th> </tr> <tr> <th></th> <th>X</th> <th>Y</th> <th>Z</th> </tr> </thead> </table>                                                                                                                                                                                                                                                                                                                                                                                                                                                                                                                                                                                                                                                                                                                                                                                                                                                                                                                                                                                                                                                                                                                                                                                                                                                                                                                                                                                                                                                                                                                                                                                                                                                                                                                                                                                                                                                                                                                                                                                                                                                                                                                                                                                                                        |                                                                                   |                                                                                    | Atom      | Coordinates (Angstroms) |  |  |   | X         | Y         | Z         |   |           |           |          |   |           |           |           |   |           |           |          |   |           |          |          |   |           |          |          |   |           |          |           |   |           |          |           |   |           |          |           |   |           |          |          |   |           |          |          |   |           |          |          |   |           |           |           |   |           |          |          |   |           |          |          |   |           |          |           |   |           |          |           |   |           |          |           |   |           |          |          |   |           |          |          |   |           |          |          |   |           |          |          |   |           |          |          |   |           |          |           |   |          |           |           |   |          |           |           |   |          |           |          |   |          |          |           |   |          |          |           |   |          |          |           |   |          |          |           |
| Atom                                                                                                                                                                                                                                                                                                                                                                                                                                                                                                                                                                                                                                                                                                                                                                                                                                                                                                                                                                                                                                                                                                                                                                                                                                                                                                                                                                                                                                                                                                                                                                                                                                                                                                                                                                                                                                                                                                                                                                                                                                                                                                                                                                                                                                                                                                                                                                                                                                                               | Coordinates (Angstroms)                                                           |                                                                                    |           |                         |  |  |   |           |           |           |   |           |           |          |   |           |           |           |   |           |           |          |   |           |          |          |   |           |          |          |   |           |          |           |   |           |          |           |   |           |          |           |   |           |          |          |   |           |          |          |   |           |          |          |   |           |           |           |   |           |          |          |   |           |          |          |   |           |          |           |   |           |          |           |   |           |          |           |   |           |          |          |   |           |          |          |   |           |          |          |   |           |          |          |   |           |          |          |   |           |          |           |   |          |           |           |   |          |           |           |   |          |           |          |   |          |          |           |   |          |          |           |   |          |          |           |   |          |          |           |
|                                                                                                                                                                                                                                                                                                                                                                                                                                                                                                                                                                                                                                                                                                                                                                                                                                                                                                                                                                                                                                                                                                                                                                                                                                                                                                                                                                                                                                                                                                                                                                                                                                                                                                                                                                                                                                                                                                                                                                                                                                                                                                                                                                                                                                                                                                                                                                                                                                                                    | X                                                                                 | Y                                                                                  | Z         |                         |  |  |   |           |           |           |   |           |           |          |   |           |           |           |   |           |           |          |   |           |          |          |   |           |          |          |   |           |          |           |   |           |          |           |   |           |          |           |   |           |          |          |   |           |          |          |   |           |          |          |   |           |           |           |   |           |          |          |   |           |          |          |   |           |          |           |   |           |          |           |   |           |          |           |   |           |          |          |   |           |          |          |   |           |          |          |   |           |          |          |   |           |          |          |   |           |          |           |   |          |           |           |   |          |           |           |   |          |           |          |   |          |          |           |   |          |          |           |   |          |          |           |   |          |          |           |
| <table border="0" style="width: 100%; text-align: center;"> <tbody> <tr><td colspan="4">-----</td></tr> <tr><td>N</td><td>-0.909392</td><td>-0.611561</td><td>-0.600107</td></tr> <tr><td>S</td><td>-2.309246</td><td>-0.051020</td><td>0.071614</td></tr> <tr><td>O</td><td>-3.396478</td><td>-0.781778</td><td>-0.570444</td></tr> <tr><td>O</td><td>-2.150968</td><td>-0.051763</td><td>1.524398</td></tr> <tr><td>C</td><td>-3.157132</td><td>2.465617</td><td>0.286885</td></tr> <tr><td>H</td><td>-3.005750</td><td>2.313940</td><td>1.358215</td></tr> <tr><td>H</td><td>-2.712656</td><td>3.419783</td><td>-0.003807</td></tr> <tr><td>C</td><td>-4.633934</td><td>2.397523</td><td>-0.104523</td></tr> <tr><td>H</td><td>-4.687512</td><td>2.395920</td><td>-1.206704</td></tr> <tr><td>H</td><td>-5.065481</td><td>1.445854</td><td>0.226651</td></tr> <tr><td>C</td><td>-5.399852</td><td>3.546712</td><td>0.474422</td></tr> <tr><td>H</td><td>-5.005564</td><td>4.551872</td><td>0.319640</td></tr> <tr><td>H</td><td>-0.993245</td><td>-0.847253</td><td>-1.582992</td></tr> <tr><td>C</td><td>-6.803499</td><td>3.405101</td><td>0.984423</td></tr> <tr><td>H</td><td>-6.858477</td><td>2.472654</td><td>1.568425</td></tr> <tr><td>C</td><td>-7.818013</td><td>3.262511</td><td>-0.180205</td></tr> <tr><td>H</td><td>-7.828094</td><td>4.168639</td><td>-0.797393</td></tr> <tr><td>H</td><td>-7.568853</td><td>2.414541</td><td>-0.826557</td></tr> <tr><td>H</td><td>-8.830647</td><td>3.104500</td><td>0.209550</td></tr> <tr><td>C</td><td>-7.194645</td><td>4.573343</td><td>1.904206</td></tr> <tr><td>H</td><td>-8.213217</td><td>4.447051</td><td>2.287159</td></tr> <tr><td>H</td><td>-6.516325</td><td>4.649043</td><td>2.760667</td></tr> <tr><td>H</td><td>-7.158412</td><td>5.525320</td><td>1.360023</td></tr> <tr><td>O</td><td>-2.334254</td><td>1.493215</td><td>-0.445568</td></tr> <tr><td>C</td><td>0.408013</td><td>-0.359303</td><td>-0.051025</td></tr> <tr><td>H</td><td>1.029430</td><td>-1.244785</td><td>-0.212107</td></tr> <tr><td>H</td><td>0.325524</td><td>-0.195070</td><td>1.025022</td></tr> <tr><td>C</td><td>1.148126</td><td>0.824435</td><td>-0.670838</td></tr> <tr><td>F</td><td>0.612765</td><td>2.020384</td><td>-0.349437</td></tr> <tr><td>F</td><td>2.436334</td><td>0.830024</td><td>-0.246234</td></tr> <tr><td>F</td><td>1.168587</td><td>0.743892</td><td>-2.026051</td></tr> </tbody> </table> |                                                                                   |                                                                                    | -----     |                         |  |  | N | -0.909392 | -0.611561 | -0.600107 | S | -2.309246 | -0.051020 | 0.071614 | O | -3.396478 | -0.781778 | -0.570444 | O | -2.150968 | -0.051763 | 1.524398 | C | -3.157132 | 2.465617 | 0.286885 | H | -3.005750 | 2.313940 | 1.358215 | H | -2.712656 | 3.419783 | -0.003807 | C | -4.633934 | 2.397523 | -0.104523 | H | -4.687512 | 2.395920 | -1.206704 | H | -5.065481 | 1.445854 | 0.226651 | C | -5.399852 | 3.546712 | 0.474422 | H | -5.005564 | 4.551872 | 0.319640 | H | -0.993245 | -0.847253 | -1.582992 | C | -6.803499 | 3.405101 | 0.984423 | H | -6.858477 | 2.472654 | 1.568425 | C | -7.818013 | 3.262511 | -0.180205 | H | -7.828094 | 4.168639 | -0.797393 | H | -7.568853 | 2.414541 | -0.826557 | H | -8.830647 | 3.104500 | 0.209550 | C | -7.194645 | 4.573343 | 1.904206 | H | -8.213217 | 4.447051 | 2.287159 | H | -6.516325 | 4.649043 | 2.760667 | H | -7.158412 | 5.525320 | 1.360023 | O | -2.334254 | 1.493215 | -0.445568 | C | 0.408013 | -0.359303 | -0.051025 | H | 1.029430 | -1.244785 | -0.212107 | H | 0.325524 | -0.195070 | 1.025022 | C | 1.148126 | 0.824435 | -0.670838 | F | 0.612765 | 2.020384 | -0.349437 | F | 2.436334 | 0.830024 | -0.246234 | F | 1.168587 | 0.743892 | -2.026051 |
| -----                                                                                                                                                                                                                                                                                                                                                                                                                                                                                                                                                                                                                                                                                                                                                                                                                                                                                                                                                                                                                                                                                                                                                                                                                                                                                                                                                                                                                                                                                                                                                                                                                                                                                                                                                                                                                                                                                                                                                                                                                                                                                                                                                                                                                                                                                                                                                                                                                                                              |                                                                                   |                                                                                    |           |                         |  |  |   |           |           |           |   |           |           |          |   |           |           |           |   |           |           |          |   |           |          |          |   |           |          |          |   |           |          |           |   |           |          |           |   |           |          |           |   |           |          |          |   |           |          |          |   |           |          |          |   |           |           |           |   |           |          |          |   |           |          |          |   |           |          |           |   |           |          |           |   |           |          |           |   |           |          |          |   |           |          |          |   |           |          |          |   |           |          |          |   |           |          |          |   |           |          |           |   |          |           |           |   |          |           |           |   |          |           |          |   |          |          |           |   |          |          |           |   |          |          |           |   |          |          |           |
| N                                                                                                                                                                                                                                                                                                                                                                                                                                                                                                                                                                                                                                                                                                                                                                                                                                                                                                                                                                                                                                                                                                                                                                                                                                                                                                                                                                                                                                                                                                                                                                                                                                                                                                                                                                                                                                                                                                                                                                                                                                                                                                                                                                                                                                                                                                                                                                                                                                                                  | -0.909392                                                                         | -0.611561                                                                          | -0.600107 |                         |  |  |   |           |           |           |   |           |           |          |   |           |           |           |   |           |           |          |   |           |          |          |   |           |          |          |   |           |          |           |   |           |          |           |   |           |          |           |   |           |          |          |   |           |          |          |   |           |          |          |   |           |           |           |   |           |          |          |   |           |          |          |   |           |          |           |   |           |          |           |   |           |          |           |   |           |          |          |   |           |          |          |   |           |          |          |   |           |          |          |   |           |          |          |   |           |          |           |   |          |           |           |   |          |           |           |   |          |           |          |   |          |          |           |   |          |          |           |   |          |          |           |   |          |          |           |
| S                                                                                                                                                                                                                                                                                                                                                                                                                                                                                                                                                                                                                                                                                                                                                                                                                                                                                                                                                                                                                                                                                                                                                                                                                                                                                                                                                                                                                                                                                                                                                                                                                                                                                                                                                                                                                                                                                                                                                                                                                                                                                                                                                                                                                                                                                                                                                                                                                                                                  | -2.309246                                                                         | -0.051020                                                                          | 0.071614  |                         |  |  |   |           |           |           |   |           |           |          |   |           |           |           |   |           |           |          |   |           |          |          |   |           |          |          |   |           |          |           |   |           |          |           |   |           |          |           |   |           |          |          |   |           |          |          |   |           |          |          |   |           |           |           |   |           |          |          |   |           |          |          |   |           |          |           |   |           |          |           |   |           |          |           |   |           |          |          |   |           |          |          |   |           |          |          |   |           |          |          |   |           |          |          |   |           |          |           |   |          |           |           |   |          |           |           |   |          |           |          |   |          |          |           |   |          |          |           |   |          |          |           |   |          |          |           |
| O                                                                                                                                                                                                                                                                                                                                                                                                                                                                                                                                                                                                                                                                                                                                                                                                                                                                                                                                                                                                                                                                                                                                                                                                                                                                                                                                                                                                                                                                                                                                                                                                                                                                                                                                                                                                                                                                                                                                                                                                                                                                                                                                                                                                                                                                                                                                                                                                                                                                  | -3.396478                                                                         | -0.781778                                                                          | -0.570444 |                         |  |  |   |           |           |           |   |           |           |          |   |           |           |           |   |           |           |          |   |           |          |          |   |           |          |          |   |           |          |           |   |           |          |           |   |           |          |           |   |           |          |          |   |           |          |          |   |           |          |          |   |           |           |           |   |           |          |          |   |           |          |          |   |           |          |           |   |           |          |           |   |           |          |           |   |           |          |          |   |           |          |          |   |           |          |          |   |           |          |          |   |           |          |          |   |           |          |           |   |          |           |           |   |          |           |           |   |          |           |          |   |          |          |           |   |          |          |           |   |          |          |           |   |          |          |           |
| O                                                                                                                                                                                                                                                                                                                                                                                                                                                                                                                                                                                                                                                                                                                                                                                                                                                                                                                                                                                                                                                                                                                                                                                                                                                                                                                                                                                                                                                                                                                                                                                                                                                                                                                                                                                                                                                                                                                                                                                                                                                                                                                                                                                                                                                                                                                                                                                                                                                                  | -2.150968                                                                         | -0.051763                                                                          | 1.524398  |                         |  |  |   |           |           |           |   |           |           |          |   |           |           |           |   |           |           |          |   |           |          |          |   |           |          |          |   |           |          |           |   |           |          |           |   |           |          |           |   |           |          |          |   |           |          |          |   |           |          |          |   |           |           |           |   |           |          |          |   |           |          |          |   |           |          |           |   |           |          |           |   |           |          |           |   |           |          |          |   |           |          |          |   |           |          |          |   |           |          |          |   |           |          |          |   |           |          |           |   |          |           |           |   |          |           |           |   |          |           |          |   |          |          |           |   |          |          |           |   |          |          |           |   |          |          |           |
| C                                                                                                                                                                                                                                                                                                                                                                                                                                                                                                                                                                                                                                                                                                                                                                                                                                                                                                                                                                                                                                                                                                                                                                                                                                                                                                                                                                                                                                                                                                                                                                                                                                                                                                                                                                                                                                                                                                                                                                                                                                                                                                                                                                                                                                                                                                                                                                                                                                                                  | -3.157132                                                                         | 2.465617                                                                           | 0.286885  |                         |  |  |   |           |           |           |   |           |           |          |   |           |           |           |   |           |           |          |   |           |          |          |   |           |          |          |   |           |          |           |   |           |          |           |   |           |          |           |   |           |          |          |   |           |          |          |   |           |          |          |   |           |           |           |   |           |          |          |   |           |          |          |   |           |          |           |   |           |          |           |   |           |          |           |   |           |          |          |   |           |          |          |   |           |          |          |   |           |          |          |   |           |          |          |   |           |          |           |   |          |           |           |   |          |           |           |   |          |           |          |   |          |          |           |   |          |          |           |   |          |          |           |   |          |          |           |
| H                                                                                                                                                                                                                                                                                                                                                                                                                                                                                                                                                                                                                                                                                                                                                                                                                                                                                                                                                                                                                                                                                                                                                                                                                                                                                                                                                                                                                                                                                                                                                                                                                                                                                                                                                                                                                                                                                                                                                                                                                                                                                                                                                                                                                                                                                                                                                                                                                                                                  | -3.005750                                                                         | 2.313940                                                                           | 1.358215  |                         |  |  |   |           |           |           |   |           |           |          |   |           |           |           |   |           |           |          |   |           |          |          |   |           |          |          |   |           |          |           |   |           |          |           |   |           |          |           |   |           |          |          |   |           |          |          |   |           |          |          |   |           |           |           |   |           |          |          |   |           |          |          |   |           |          |           |   |           |          |           |   |           |          |           |   |           |          |          |   |           |          |          |   |           |          |          |   |           |          |          |   |           |          |          |   |           |          |           |   |          |           |           |   |          |           |           |   |          |           |          |   |          |          |           |   |          |          |           |   |          |          |           |   |          |          |           |
| H                                                                                                                                                                                                                                                                                                                                                                                                                                                                                                                                                                                                                                                                                                                                                                                                                                                                                                                                                                                                                                                                                                                                                                                                                                                                                                                                                                                                                                                                                                                                                                                                                                                                                                                                                                                                                                                                                                                                                                                                                                                                                                                                                                                                                                                                                                                                                                                                                                                                  | -2.712656                                                                         | 3.419783                                                                           | -0.003807 |                         |  |  |   |           |           |           |   |           |           |          |   |           |           |           |   |           |           |          |   |           |          |          |   |           |          |          |   |           |          |           |   |           |          |           |   |           |          |           |   |           |          |          |   |           |          |          |   |           |          |          |   |           |           |           |   |           |          |          |   |           |          |          |   |           |          |           |   |           |          |           |   |           |          |           |   |           |          |          |   |           |          |          |   |           |          |          |   |           |          |          |   |           |          |          |   |           |          |           |   |          |           |           |   |          |           |           |   |          |           |          |   |          |          |           |   |          |          |           |   |          |          |           |   |          |          |           |
| C                                                                                                                                                                                                                                                                                                                                                                                                                                                                                                                                                                                                                                                                                                                                                                                                                                                                                                                                                                                                                                                                                                                                                                                                                                                                                                                                                                                                                                                                                                                                                                                                                                                                                                                                                                                                                                                                                                                                                                                                                                                                                                                                                                                                                                                                                                                                                                                                                                                                  | -4.633934                                                                         | 2.397523                                                                           | -0.104523 |                         |  |  |   |           |           |           |   |           |           |          |   |           |           |           |   |           |           |          |   |           |          |          |   |           |          |          |   |           |          |           |   |           |          |           |   |           |          |           |   |           |          |          |   |           |          |          |   |           |          |          |   |           |           |           |   |           |          |          |   |           |          |          |   |           |          |           |   |           |          |           |   |           |          |           |   |           |          |          |   |           |          |          |   |           |          |          |   |           |          |          |   |           |          |          |   |           |          |           |   |          |           |           |   |          |           |           |   |          |           |          |   |          |          |           |   |          |          |           |   |          |          |           |   |          |          |           |
| H                                                                                                                                                                                                                                                                                                                                                                                                                                                                                                                                                                                                                                                                                                                                                                                                                                                                                                                                                                                                                                                                                                                                                                                                                                                                                                                                                                                                                                                                                                                                                                                                                                                                                                                                                                                                                                                                                                                                                                                                                                                                                                                                                                                                                                                                                                                                                                                                                                                                  | -4.687512                                                                         | 2.395920                                                                           | -1.206704 |                         |  |  |   |           |           |           |   |           |           |          |   |           |           |           |   |           |           |          |   |           |          |          |   |           |          |          |   |           |          |           |   |           |          |           |   |           |          |           |   |           |          |          |   |           |          |          |   |           |          |          |   |           |           |           |   |           |          |          |   |           |          |          |   |           |          |           |   |           |          |           |   |           |          |           |   |           |          |          |   |           |          |          |   |           |          |          |   |           |          |          |   |           |          |          |   |           |          |           |   |          |           |           |   |          |           |           |   |          |           |          |   |          |          |           |   |          |          |           |   |          |          |           |   |          |          |           |
| H                                                                                                                                                                                                                                                                                                                                                                                                                                                                                                                                                                                                                                                                                                                                                                                                                                                                                                                                                                                                                                                                                                                                                                                                                                                                                                                                                                                                                                                                                                                                                                                                                                                                                                                                                                                                                                                                                                                                                                                                                                                                                                                                                                                                                                                                                                                                                                                                                                                                  | -5.065481                                                                         | 1.445854                                                                           | 0.226651  |                         |  |  |   |           |           |           |   |           |           |          |   |           |           |           |   |           |           |          |   |           |          |          |   |           |          |          |   |           |          |           |   |           |          |           |   |           |          |           |   |           |          |          |   |           |          |          |   |           |          |          |   |           |           |           |   |           |          |          |   |           |          |          |   |           |          |           |   |           |          |           |   |           |          |           |   |           |          |          |   |           |          |          |   |           |          |          |   |           |          |          |   |           |          |          |   |           |          |           |   |          |           |           |   |          |           |           |   |          |           |          |   |          |          |           |   |          |          |           |   |          |          |           |   |          |          |           |
| C                                                                                                                                                                                                                                                                                                                                                                                                                                                                                                                                                                                                                                                                                                                                                                                                                                                                                                                                                                                                                                                                                                                                                                                                                                                                                                                                                                                                                                                                                                                                                                                                                                                                                                                                                                                                                                                                                                                                                                                                                                                                                                                                                                                                                                                                                                                                                                                                                                                                  | -5.399852                                                                         | 3.546712                                                                           | 0.474422  |                         |  |  |   |           |           |           |   |           |           |          |   |           |           |           |   |           |           |          |   |           |          |          |   |           |          |          |   |           |          |           |   |           |          |           |   |           |          |           |   |           |          |          |   |           |          |          |   |           |          |          |   |           |           |           |   |           |          |          |   |           |          |          |   |           |          |           |   |           |          |           |   |           |          |           |   |           |          |          |   |           |          |          |   |           |          |          |   |           |          |          |   |           |          |          |   |           |          |           |   |          |           |           |   |          |           |           |   |          |           |          |   |          |          |           |   |          |          |           |   |          |          |           |   |          |          |           |
| H                                                                                                                                                                                                                                                                                                                                                                                                                                                                                                                                                                                                                                                                                                                                                                                                                                                                                                                                                                                                                                                                                                                                                                                                                                                                                                                                                                                                                                                                                                                                                                                                                                                                                                                                                                                                                                                                                                                                                                                                                                                                                                                                                                                                                                                                                                                                                                                                                                                                  | -5.005564                                                                         | 4.551872                                                                           | 0.319640  |                         |  |  |   |           |           |           |   |           |           |          |   |           |           |           |   |           |           |          |   |           |          |          |   |           |          |          |   |           |          |           |   |           |          |           |   |           |          |           |   |           |          |          |   |           |          |          |   |           |          |          |   |           |           |           |   |           |          |          |   |           |          |          |   |           |          |           |   |           |          |           |   |           |          |           |   |           |          |          |   |           |          |          |   |           |          |          |   |           |          |          |   |           |          |          |   |           |          |           |   |          |           |           |   |          |           |           |   |          |           |          |   |          |          |           |   |          |          |           |   |          |          |           |   |          |          |           |
| H                                                                                                                                                                                                                                                                                                                                                                                                                                                                                                                                                                                                                                                                                                                                                                                                                                                                                                                                                                                                                                                                                                                                                                                                                                                                                                                                                                                                                                                                                                                                                                                                                                                                                                                                                                                                                                                                                                                                                                                                                                                                                                                                                                                                                                                                                                                                                                                                                                                                  | -0.993245                                                                         | -0.847253                                                                          | -1.582992 |                         |  |  |   |           |           |           |   |           |           |          |   |           |           |           |   |           |           |          |   |           |          |          |   |           |          |          |   |           |          |           |   |           |          |           |   |           |          |           |   |           |          |          |   |           |          |          |   |           |          |          |   |           |           |           |   |           |          |          |   |           |          |          |   |           |          |           |   |           |          |           |   |           |          |           |   |           |          |          |   |           |          |          |   |           |          |          |   |           |          |          |   |           |          |          |   |           |          |           |   |          |           |           |   |          |           |           |   |          |           |          |   |          |          |           |   |          |          |           |   |          |          |           |   |          |          |           |
| C                                                                                                                                                                                                                                                                                                                                                                                                                                                                                                                                                                                                                                                                                                                                                                                                                                                                                                                                                                                                                                                                                                                                                                                                                                                                                                                                                                                                                                                                                                                                                                                                                                                                                                                                                                                                                                                                                                                                                                                                                                                                                                                                                                                                                                                                                                                                                                                                                                                                  | -6.803499                                                                         | 3.405101                                                                           | 0.984423  |                         |  |  |   |           |           |           |   |           |           |          |   |           |           |           |   |           |           |          |   |           |          |          |   |           |          |          |   |           |          |           |   |           |          |           |   |           |          |           |   |           |          |          |   |           |          |          |   |           |          |          |   |           |           |           |   |           |          |          |   |           |          |          |   |           |          |           |   |           |          |           |   |           |          |           |   |           |          |          |   |           |          |          |   |           |          |          |   |           |          |          |   |           |          |          |   |           |          |           |   |          |           |           |   |          |           |           |   |          |           |          |   |          |          |           |   |          |          |           |   |          |          |           |   |          |          |           |
| H                                                                                                                                                                                                                                                                                                                                                                                                                                                                                                                                                                                                                                                                                                                                                                                                                                                                                                                                                                                                                                                                                                                                                                                                                                                                                                                                                                                                                                                                                                                                                                                                                                                                                                                                                                                                                                                                                                                                                                                                                                                                                                                                                                                                                                                                                                                                                                                                                                                                  | -6.858477                                                                         | 2.472654                                                                           | 1.568425  |                         |  |  |   |           |           |           |   |           |           |          |   |           |           |           |   |           |           |          |   |           |          |          |   |           |          |          |   |           |          |           |   |           |          |           |   |           |          |           |   |           |          |          |   |           |          |          |   |           |          |          |   |           |           |           |   |           |          |          |   |           |          |          |   |           |          |           |   |           |          |           |   |           |          |           |   |           |          |          |   |           |          |          |   |           |          |          |   |           |          |          |   |           |          |          |   |           |          |           |   |          |           |           |   |          |           |           |   |          |           |          |   |          |          |           |   |          |          |           |   |          |          |           |   |          |          |           |
| C                                                                                                                                                                                                                                                                                                                                                                                                                                                                                                                                                                                                                                                                                                                                                                                                                                                                                                                                                                                                                                                                                                                                                                                                                                                                                                                                                                                                                                                                                                                                                                                                                                                                                                                                                                                                                                                                                                                                                                                                                                                                                                                                                                                                                                                                                                                                                                                                                                                                  | -7.818013                                                                         | 3.262511                                                                           | -0.180205 |                         |  |  |   |           |           |           |   |           |           |          |   |           |           |           |   |           |           |          |   |           |          |          |   |           |          |          |   |           |          |           |   |           |          |           |   |           |          |           |   |           |          |          |   |           |          |          |   |           |          |          |   |           |           |           |   |           |          |          |   |           |          |          |   |           |          |           |   |           |          |           |   |           |          |           |   |           |          |          |   |           |          |          |   |           |          |          |   |           |          |          |   |           |          |          |   |           |          |           |   |          |           |           |   |          |           |           |   |          |           |          |   |          |          |           |   |          |          |           |   |          |          |           |   |          |          |           |
| H                                                                                                                                                                                                                                                                                                                                                                                                                                                                                                                                                                                                                                                                                                                                                                                                                                                                                                                                                                                                                                                                                                                                                                                                                                                                                                                                                                                                                                                                                                                                                                                                                                                                                                                                                                                                                                                                                                                                                                                                                                                                                                                                                                                                                                                                                                                                                                                                                                                                  | -7.828094                                                                         | 4.168639                                                                           | -0.797393 |                         |  |  |   |           |           |           |   |           |           |          |   |           |           |           |   |           |           |          |   |           |          |          |   |           |          |          |   |           |          |           |   |           |          |           |   |           |          |           |   |           |          |          |   |           |          |          |   |           |          |          |   |           |           |           |   |           |          |          |   |           |          |          |   |           |          |           |   |           |          |           |   |           |          |           |   |           |          |          |   |           |          |          |   |           |          |          |   |           |          |          |   |           |          |          |   |           |          |           |   |          |           |           |   |          |           |           |   |          |           |          |   |          |          |           |   |          |          |           |   |          |          |           |   |          |          |           |
| H                                                                                                                                                                                                                                                                                                                                                                                                                                                                                                                                                                                                                                                                                                                                                                                                                                                                                                                                                                                                                                                                                                                                                                                                                                                                                                                                                                                                                                                                                                                                                                                                                                                                                                                                                                                                                                                                                                                                                                                                                                                                                                                                                                                                                                                                                                                                                                                                                                                                  | -7.568853                                                                         | 2.414541                                                                           | -0.826557 |                         |  |  |   |           |           |           |   |           |           |          |   |           |           |           |   |           |           |          |   |           |          |          |   |           |          |          |   |           |          |           |   |           |          |           |   |           |          |           |   |           |          |          |   |           |          |          |   |           |          |          |   |           |           |           |   |           |          |          |   |           |          |          |   |           |          |           |   |           |          |           |   |           |          |           |   |           |          |          |   |           |          |          |   |           |          |          |   |           |          |          |   |           |          |          |   |           |          |           |   |          |           |           |   |          |           |           |   |          |           |          |   |          |          |           |   |          |          |           |   |          |          |           |   |          |          |           |
| H                                                                                                                                                                                                                                                                                                                                                                                                                                                                                                                                                                                                                                                                                                                                                                                                                                                                                                                                                                                                                                                                                                                                                                                                                                                                                                                                                                                                                                                                                                                                                                                                                                                                                                                                                                                                                                                                                                                                                                                                                                                                                                                                                                                                                                                                                                                                                                                                                                                                  | -8.830647                                                                         | 3.104500                                                                           | 0.209550  |                         |  |  |   |           |           |           |   |           |           |          |   |           |           |           |   |           |           |          |   |           |          |          |   |           |          |          |   |           |          |           |   |           |          |           |   |           |          |           |   |           |          |          |   |           |          |          |   |           |          |          |   |           |           |           |   |           |          |          |   |           |          |          |   |           |          |           |   |           |          |           |   |           |          |           |   |           |          |          |   |           |          |          |   |           |          |          |   |           |          |          |   |           |          |          |   |           |          |           |   |          |           |           |   |          |           |           |   |          |           |          |   |          |          |           |   |          |          |           |   |          |          |           |   |          |          |           |
| C                                                                                                                                                                                                                                                                                                                                                                                                                                                                                                                                                                                                                                                                                                                                                                                                                                                                                                                                                                                                                                                                                                                                                                                                                                                                                                                                                                                                                                                                                                                                                                                                                                                                                                                                                                                                                                                                                                                                                                                                                                                                                                                                                                                                                                                                                                                                                                                                                                                                  | -7.194645                                                                         | 4.573343                                                                           | 1.904206  |                         |  |  |   |           |           |           |   |           |           |          |   |           |           |           |   |           |           |          |   |           |          |          |   |           |          |          |   |           |          |           |   |           |          |           |   |           |          |           |   |           |          |          |   |           |          |          |   |           |          |          |   |           |           |           |   |           |          |          |   |           |          |          |   |           |          |           |   |           |          |           |   |           |          |           |   |           |          |          |   |           |          |          |   |           |          |          |   |           |          |          |   |           |          |          |   |           |          |           |   |          |           |           |   |          |           |           |   |          |           |          |   |          |          |           |   |          |          |           |   |          |          |           |   |          |          |           |
| H                                                                                                                                                                                                                                                                                                                                                                                                                                                                                                                                                                                                                                                                                                                                                                                                                                                                                                                                                                                                                                                                                                                                                                                                                                                                                                                                                                                                                                                                                                                                                                                                                                                                                                                                                                                                                                                                                                                                                                                                                                                                                                                                                                                                                                                                                                                                                                                                                                                                  | -8.213217                                                                         | 4.447051                                                                           | 2.287159  |                         |  |  |   |           |           |           |   |           |           |          |   |           |           |           |   |           |           |          |   |           |          |          |   |           |          |          |   |           |          |           |   |           |          |           |   |           |          |           |   |           |          |          |   |           |          |          |   |           |          |          |   |           |           |           |   |           |          |          |   |           |          |          |   |           |          |           |   |           |          |           |   |           |          |           |   |           |          |          |   |           |          |          |   |           |          |          |   |           |          |          |   |           |          |          |   |           |          |           |   |          |           |           |   |          |           |           |   |          |           |          |   |          |          |           |   |          |          |           |   |          |          |           |   |          |          |           |
| H                                                                                                                                                                                                                                                                                                                                                                                                                                                                                                                                                                                                                                                                                                                                                                                                                                                                                                                                                                                                                                                                                                                                                                                                                                                                                                                                                                                                                                                                                                                                                                                                                                                                                                                                                                                                                                                                                                                                                                                                                                                                                                                                                                                                                                                                                                                                                                                                                                                                  | -6.516325                                                                         | 4.649043                                                                           | 2.760667  |                         |  |  |   |           |           |           |   |           |           |          |   |           |           |           |   |           |           |          |   |           |          |          |   |           |          |          |   |           |          |           |   |           |          |           |   |           |          |           |   |           |          |          |   |           |          |          |   |           |          |          |   |           |           |           |   |           |          |          |   |           |          |          |   |           |          |           |   |           |          |           |   |           |          |           |   |           |          |          |   |           |          |          |   |           |          |          |   |           |          |          |   |           |          |          |   |           |          |           |   |          |           |           |   |          |           |           |   |          |           |          |   |          |          |           |   |          |          |           |   |          |          |           |   |          |          |           |
| H                                                                                                                                                                                                                                                                                                                                                                                                                                                                                                                                                                                                                                                                                                                                                                                                                                                                                                                                                                                                                                                                                                                                                                                                                                                                                                                                                                                                                                                                                                                                                                                                                                                                                                                                                                                                                                                                                                                                                                                                                                                                                                                                                                                                                                                                                                                                                                                                                                                                  | -7.158412                                                                         | 5.525320                                                                           | 1.360023  |                         |  |  |   |           |           |           |   |           |           |          |   |           |           |           |   |           |           |          |   |           |          |          |   |           |          |          |   |           |          |           |   |           |          |           |   |           |          |           |   |           |          |          |   |           |          |          |   |           |          |          |   |           |           |           |   |           |          |          |   |           |          |          |   |           |          |           |   |           |          |           |   |           |          |           |   |           |          |          |   |           |          |          |   |           |          |          |   |           |          |          |   |           |          |          |   |           |          |           |   |          |           |           |   |          |           |           |   |          |           |          |   |          |          |           |   |          |          |           |   |          |          |           |   |          |          |           |
| O                                                                                                                                                                                                                                                                                                                                                                                                                                                                                                                                                                                                                                                                                                                                                                                                                                                                                                                                                                                                                                                                                                                                                                                                                                                                                                                                                                                                                                                                                                                                                                                                                                                                                                                                                                                                                                                                                                                                                                                                                                                                                                                                                                                                                                                                                                                                                                                                                                                                  | -2.334254                                                                         | 1.493215                                                                           | -0.445568 |                         |  |  |   |           |           |           |   |           |           |          |   |           |           |           |   |           |           |          |   |           |          |          |   |           |          |          |   |           |          |           |   |           |          |           |   |           |          |           |   |           |          |          |   |           |          |          |   |           |          |          |   |           |           |           |   |           |          |          |   |           |          |          |   |           |          |           |   |           |          |           |   |           |          |           |   |           |          |          |   |           |          |          |   |           |          |          |   |           |          |          |   |           |          |          |   |           |          |           |   |          |           |           |   |          |           |           |   |          |           |          |   |          |          |           |   |          |          |           |   |          |          |           |   |          |          |           |
| C                                                                                                                                                                                                                                                                                                                                                                                                                                                                                                                                                                                                                                                                                                                                                                                                                                                                                                                                                                                                                                                                                                                                                                                                                                                                                                                                                                                                                                                                                                                                                                                                                                                                                                                                                                                                                                                                                                                                                                                                                                                                                                                                                                                                                                                                                                                                                                                                                                                                  | 0.408013                                                                          | -0.359303                                                                          | -0.051025 |                         |  |  |   |           |           |           |   |           |           |          |   |           |           |           |   |           |           |          |   |           |          |          |   |           |          |          |   |           |          |           |   |           |          |           |   |           |          |           |   |           |          |          |   |           |          |          |   |           |          |          |   |           |           |           |   |           |          |          |   |           |          |          |   |           |          |           |   |           |          |           |   |           |          |           |   |           |          |          |   |           |          |          |   |           |          |          |   |           |          |          |   |           |          |          |   |           |          |           |   |          |           |           |   |          |           |           |   |          |           |          |   |          |          |           |   |          |          |           |   |          |          |           |   |          |          |           |
| H                                                                                                                                                                                                                                                                                                                                                                                                                                                                                                                                                                                                                                                                                                                                                                                                                                                                                                                                                                                                                                                                                                                                                                                                                                                                                                                                                                                                                                                                                                                                                                                                                                                                                                                                                                                                                                                                                                                                                                                                                                                                                                                                                                                                                                                                                                                                                                                                                                                                  | 1.029430                                                                          | -1.244785                                                                          | -0.212107 |                         |  |  |   |           |           |           |   |           |           |          |   |           |           |           |   |           |           |          |   |           |          |          |   |           |          |          |   |           |          |           |   |           |          |           |   |           |          |           |   |           |          |          |   |           |          |          |   |           |          |          |   |           |           |           |   |           |          |          |   |           |          |          |   |           |          |           |   |           |          |           |   |           |          |           |   |           |          |          |   |           |          |          |   |           |          |          |   |           |          |          |   |           |          |          |   |           |          |           |   |          |           |           |   |          |           |           |   |          |           |          |   |          |          |           |   |          |          |           |   |          |          |           |   |          |          |           |
| H                                                                                                                                                                                                                                                                                                                                                                                                                                                                                                                                                                                                                                                                                                                                                                                                                                                                                                                                                                                                                                                                                                                                                                                                                                                                                                                                                                                                                                                                                                                                                                                                                                                                                                                                                                                                                                                                                                                                                                                                                                                                                                                                                                                                                                                                                                                                                                                                                                                                  | 0.325524                                                                          | -0.195070                                                                          | 1.025022  |                         |  |  |   |           |           |           |   |           |           |          |   |           |           |           |   |           |           |          |   |           |          |          |   |           |          |          |   |           |          |           |   |           |          |           |   |           |          |           |   |           |          |          |   |           |          |          |   |           |          |          |   |           |           |           |   |           |          |          |   |           |          |          |   |           |          |           |   |           |          |           |   |           |          |           |   |           |          |          |   |           |          |          |   |           |          |          |   |           |          |          |   |           |          |          |   |           |          |           |   |          |           |           |   |          |           |           |   |          |           |          |   |          |          |           |   |          |          |           |   |          |          |           |   |          |          |           |
| C                                                                                                                                                                                                                                                                                                                                                                                                                                                                                                                                                                                                                                                                                                                                                                                                                                                                                                                                                                                                                                                                                                                                                                                                                                                                                                                                                                                                                                                                                                                                                                                                                                                                                                                                                                                                                                                                                                                                                                                                                                                                                                                                                                                                                                                                                                                                                                                                                                                                  | 1.148126                                                                          | 0.824435                                                                           | -0.670838 |                         |  |  |   |           |           |           |   |           |           |          |   |           |           |           |   |           |           |          |   |           |          |          |   |           |          |          |   |           |          |           |   |           |          |           |   |           |          |           |   |           |          |          |   |           |          |          |   |           |          |          |   |           |           |           |   |           |          |          |   |           |          |          |   |           |          |           |   |           |          |           |   |           |          |           |   |           |          |          |   |           |          |          |   |           |          |          |   |           |          |          |   |           |          |          |   |           |          |           |   |          |           |           |   |          |           |           |   |          |           |          |   |          |          |           |   |          |          |           |   |          |          |           |   |          |          |           |
| F                                                                                                                                                                                                                                                                                                                                                                                                                                                                                                                                                                                                                                                                                                                                                                                                                                                                                                                                                                                                                                                                                                                                                                                                                                                                                                                                                                                                                                                                                                                                                                                                                                                                                                                                                                                                                                                                                                                                                                                                                                                                                                                                                                                                                                                                                                                                                                                                                                                                  | 0.612765                                                                          | 2.020384                                                                           | -0.349437 |                         |  |  |   |           |           |           |   |           |           |          |   |           |           |           |   |           |           |          |   |           |          |          |   |           |          |          |   |           |          |           |   |           |          |           |   |           |          |           |   |           |          |          |   |           |          |          |   |           |          |          |   |           |           |           |   |           |          |          |   |           |          |          |   |           |          |           |   |           |          |           |   |           |          |           |   |           |          |          |   |           |          |          |   |           |          |          |   |           |          |          |   |           |          |          |   |           |          |           |   |          |           |           |   |          |           |           |   |          |           |          |   |          |          |           |   |          |          |           |   |          |          |           |   |          |          |           |
| F                                                                                                                                                                                                                                                                                                                                                                                                                                                                                                                                                                                                                                                                                                                                                                                                                                                                                                                                                                                                                                                                                                                                                                                                                                                                                                                                                                                                                                                                                                                                                                                                                                                                                                                                                                                                                                                                                                                                                                                                                                                                                                                                                                                                                                                                                                                                                                                                                                                                  | 2.436334                                                                          | 0.830024                                                                           | -0.246234 |                         |  |  |   |           |           |           |   |           |           |          |   |           |           |           |   |           |           |          |   |           |          |          |   |           |          |          |   |           |          |           |   |           |          |           |   |           |          |           |   |           |          |          |   |           |          |          |   |           |          |          |   |           |           |           |   |           |          |          |   |           |          |          |   |           |          |           |   |           |          |           |   |           |          |           |   |           |          |          |   |           |          |          |   |           |          |          |   |           |          |          |   |           |          |          |   |           |          |           |   |          |           |           |   |          |           |           |   |          |           |          |   |          |          |           |   |          |          |           |   |          |          |           |   |          |          |           |
| F                                                                                                                                                                                                                                                                                                                                                                                                                                                                                                                                                                                                                                                                                                                                                                                                                                                                                                                                                                                                                                                                                                                                                                                                                                                                                                                                                                                                                                                                                                                                                                                                                                                                                                                                                                                                                                                                                                                                                                                                                                                                                                                                                                                                                                                                                                                                                                                                                                                                  | 1.168587                                                                          | 0.743892                                                                           | -2.026051 |                         |  |  |   |           |           |           |   |           |           |          |   |           |           |           |   |           |           |          |   |           |          |          |   |           |          |          |   |           |          |           |   |           |          |           |   |           |          |           |   |           |          |          |   |           |          |          |   |           |          |          |   |           |           |           |   |           |          |          |   |           |          |          |   |           |          |           |   |           |          |           |   |           |          |           |   |           |          |          |   |           |          |          |   |           |          |          |   |           |          |          |   |           |          |          |   |           |          |           |   |          |           |           |   |          |           |           |   |          |           |          |   |          |          |           |   |          |          |           |   |          |          |           |   |          |          |           |

|                                                                                                                                                                                                                                                                                                                                                                                                                                                                                                                                                                                                                                                                                                                                                                                                                                                                                                                                                                                                                                                                                                                                                                                                                                                                                                                                                                                                                                                                                                                                                                                                                                                                                                                                                                                                                                                                                                                                                                                                                                                                                                                                                                                                                                                                                                                                                                                                                                                                                                                                                                                                                                                                                                                                                                                                                                                                                                                                                                                                                                                                                                                                                                                                                                                                                                                                                                                                                                                                                                                                                                                                                                                                                                                                                                                                                                                                                                                                                                                                                                                                                                                                                                                                                                                                                                                                                                                                                                                                                                                                                                                                                                                                                                                                                                                                                                                                                                                                                                                                                                                                                                                                                                                                                                                                                                                                                                                                                                                                                                                                                                                                                                                                                                                                                                                                                                                                                                                                                                                                                                               |                                                                                   |                                                                                    |           |           |           |          |   |           |          |          |   |           |          |          |   |           |          |          |   |           |          |          |   |           |          |          |   |           |          |          |   |           |          |          |   |           |          |          |   |           |          |           |   |           |          |           |   |           |          |          |   |           |          |          |   |           |          |          |   |           |          |           |   |           |           |          |   |           |          |           |   |           |          |           |   |           |          |          |   |           |          |           |   |           |          |           |   |           |          |           |   |           |          |           |   |            |          |           |   |           |           |          |   |           |          |           |   |           |           |           |   |           |           |          |   |           |           |           |   |          |           |          |   |           |          |          |
|-----------------------------------------------------------------------------------------------------------------------------------------------------------------------------------------------------------------------------------------------------------------------------------------------------------------------------------------------------------------------------------------------------------------------------------------------------------------------------------------------------------------------------------------------------------------------------------------------------------------------------------------------------------------------------------------------------------------------------------------------------------------------------------------------------------------------------------------------------------------------------------------------------------------------------------------------------------------------------------------------------------------------------------------------------------------------------------------------------------------------------------------------------------------------------------------------------------------------------------------------------------------------------------------------------------------------------------------------------------------------------------------------------------------------------------------------------------------------------------------------------------------------------------------------------------------------------------------------------------------------------------------------------------------------------------------------------------------------------------------------------------------------------------------------------------------------------------------------------------------------------------------------------------------------------------------------------------------------------------------------------------------------------------------------------------------------------------------------------------------------------------------------------------------------------------------------------------------------------------------------------------------------------------------------------------------------------------------------------------------------------------------------------------------------------------------------------------------------------------------------------------------------------------------------------------------------------------------------------------------------------------------------------------------------------------------------------------------------------------------------------------------------------------------------------------------------------------------------------------------------------------------------------------------------------------------------------------------------------------------------------------------------------------------------------------------------------------------------------------------------------------------------------------------------------------------------------------------------------------------------------------------------------------------------------------------------------------------------------------------------------------------------------------------------------------------------------------------------------------------------------------------------------------------------------------------------------------------------------------------------------------------------------------------------------------------------------------------------------------------------------------------------------------------------------------------------------------------------------------------------------------------------------------------------------------------------------------------------------------------------------------------------------------------------------------------------------------------------------------------------------------------------------------------------------------------------------------------------------------------------------------------------------------------------------------------------------------------------------------------------------------------------------------------------------------------------------------------------------------------------------------------------------------------------------------------------------------------------------------------------------------------------------------------------------------------------------------------------------------------------------------------------------------------------------------------------------------------------------------------------------------------------------------------------------------------------------------------------------------------------------------------------------------------------------------------------------------------------------------------------------------------------------------------------------------------------------------------------------------------------------------------------------------------------------------------------------------------------------------------------------------------------------------------------------------------------------------------------------------------------------------------------------------------------------------------------------------------------------------------------------------------------------------------------------------------------------------------------------------------------------------------------------------------------------------------------------------------------------------------------------------------------------------------------------------------------------------------------------------------------------------------------------------------------|-----------------------------------------------------------------------------------|------------------------------------------------------------------------------------|-----------|-----------|-----------|----------|---|-----------|----------|----------|---|-----------|----------|----------|---|-----------|----------|----------|---|-----------|----------|----------|---|-----------|----------|----------|---|-----------|----------|----------|---|-----------|----------|----------|---|-----------|----------|----------|---|-----------|----------|-----------|---|-----------|----------|-----------|---|-----------|----------|----------|---|-----------|----------|----------|---|-----------|----------|----------|---|-----------|----------|-----------|---|-----------|-----------|----------|---|-----------|----------|-----------|---|-----------|----------|-----------|---|-----------|----------|----------|---|-----------|----------|-----------|---|-----------|----------|-----------|---|-----------|----------|-----------|---|-----------|----------|-----------|---|------------|----------|-----------|---|-----------|-----------|----------|---|-----------|----------|-----------|---|-----------|-----------|-----------|---|-----------|-----------|----------|---|-----------|-----------|-----------|---|----------|-----------|----------|---|-----------|----------|----------|
| 5                                                                                                                                                                                                                                                                                                                                                                                                                                                                                                                                                                                                                                                                                                                                                                                                                                                                                                                                                                                                                                                                                                                                                                                                                                                                                                                                                                                                                                                                                                                                                                                                                                                                                                                                                                                                                                                                                                                                                                                                                                                                                                                                                                                                                                                                                                                                                                                                                                                                                                                                                                                                                                                                                                                                                                                                                                                                                                                                                                                                                                                                                                                                                                                                                                                                                                                                                                                                                                                                                                                                                                                                                                                                                                                                                                                                                                                                                                                                                                                                                                                                                                                                                                                                                                                                                                                                                                                                                                                                                                                                                                                                                                                                                                                                                                                                                                                                                                                                                                                                                                                                                                                                                                                                                                                                                                                                                                                                                                                                                                                                                                                                                                                                                                                                                                                                                                                                                                                                                                                                                                             | 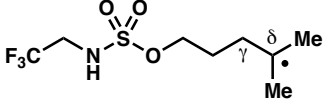 |  |           |           |           |          |   |           |          |          |   |           |          |          |   |           |          |          |   |           |          |          |   |           |          |          |   |           |          |          |   |           |          |          |   |           |          |          |   |           |          |           |   |           |          |           |   |           |          |          |   |           |          |          |   |           |          |          |   |           |          |           |   |           |           |          |   |           |          |           |   |           |          |           |   |           |          |          |   |           |          |           |   |           |          |           |   |           |          |           |   |           |          |           |   |            |          |           |   |           |           |          |   |           |          |           |   |           |           |           |   |           |           |          |   |           |           |           |   |          |           |          |   |           |          |          |
| <p style="text-align: center;">Atom                      Coordinates (Angstroms)</p> <p style="text-align: center;">                                 X                      Y                      Z</p> <p style="text-align: center;">-----</p>                                                                                                                                                                                                                                                                                                                                                                                                                                                                                                                                                                                                                                                                                                                                                                                                                                                                                                                                                                                                                                                                                                                                                                                                                                                                                                                                                                                                                                                                                                                                                                                                                                                                                                                                                                                                                                                                                                                                                                                                                                                                                                                                                                                                                                                                                                                                                                                                                                                                                                                                                                                                                                                                                                                                                                                                                                                                                                                                                                                                                                                                                                                                                                                                                                                                                                                                                                                                                                                                                                                                                                                                                                                                                                                                                                                                                                                                                                                                                                                                                                                                                                                                                                                                                                                                                                                                                                                                                                                                                                                                                                                                                                                                                                                                                                                                                                                                                                                                                                                                                                                                                                                                                                                                                                                                                                                                                                                                                                                                                                                                                                                                                                                                                                                                                                                             |                                                                                   |                                                                                    |           |           |           |          |   |           |          |          |   |           |          |          |   |           |          |          |   |           |          |          |   |           |          |          |   |           |          |          |   |           |          |          |   |           |          |          |   |           |          |           |   |           |          |           |   |           |          |          |   |           |          |          |   |           |          |          |   |           |          |           |   |           |           |          |   |           |          |           |   |           |          |           |   |           |          |          |   |           |          |           |   |           |          |           |   |           |          |           |   |           |          |           |   |            |          |           |   |           |           |          |   |           |          |           |   |           |           |           |   |           |           |          |   |           |           |           |   |          |           |          |   |           |          |          |
| <table style="width: 100%; border-collapse: collapse;"> <tbody> <tr><td style="text-align: center;">C</td><td style="text-align: center;">-0.741258</td><td style="text-align: center;">-1.232617</td><td style="text-align: center;">0.703845</td></tr> <tr><td style="text-align: center;">N</td><td style="text-align: center;">-2.650424</td><td style="text-align: center;">0.220541</td><td style="text-align: center;">1.348003</td></tr> <tr><td style="text-align: center;">S</td><td style="text-align: center;">-2.513145</td><td style="text-align: center;">1.879298</td><td style="text-align: center;">1.498449</td></tr> <tr><td style="text-align: center;">O</td><td style="text-align: center;">-2.773900</td><td style="text-align: center;">2.162275</td><td style="text-align: center;">2.907129</td></tr> <tr><td style="text-align: center;">O</td><td style="text-align: center;">-1.332652</td><td style="text-align: center;">2.363791</td><td style="text-align: center;">0.799796</td></tr> <tr><td style="text-align: center;">C</td><td style="text-align: center;">-5.104411</td><td style="text-align: center;">2.203731</td><td style="text-align: center;">1.070259</td></tr> <tr><td style="text-align: center;">H</td><td style="text-align: center;">-5.256918</td><td style="text-align: center;">1.123753</td><td style="text-align: center;">1.173569</td></tr> <tr><td style="text-align: center;">H</td><td style="text-align: center;">-5.212372</td><td style="text-align: center;">2.681169</td><td style="text-align: center;">2.047934</td></tr> <tr><td style="text-align: center;">C</td><td style="text-align: center;">-6.041995</td><td style="text-align: center;">2.807152</td><td style="text-align: center;">0.036945</td></tr> <tr><td style="text-align: center;">H</td><td style="text-align: center;">-5.809330</td><td style="text-align: center;">3.871599</td><td style="text-align: center;">-0.074828</td></tr> <tr><td style="text-align: center;">H</td><td style="text-align: center;">-5.867518</td><td style="text-align: center;">2.333143</td><td style="text-align: center;">-0.935310</td></tr> <tr><td style="text-align: center;">C</td><td style="text-align: center;">-7.522841</td><td style="text-align: center;">2.624689</td><td style="text-align: center;">0.447114</td></tr> <tr><td style="text-align: center;">H</td><td style="text-align: center;">-7.735218</td><td style="text-align: center;">1.551667</td><td style="text-align: center;">0.538828</td></tr> <tr><td style="text-align: center;">H</td><td style="text-align: center;">-7.656437</td><td style="text-align: center;">3.054391</td><td style="text-align: center;">1.455661</td></tr> <tr><td style="text-align: center;">C</td><td style="text-align: center;">-8.496270</td><td style="text-align: center;">3.256809</td><td style="text-align: center;">-0.511761</td></tr> <tr><td style="text-align: center;">H</td><td style="text-align: center;">-2.738562</td><td style="text-align: center;">-0.241078</td><td style="text-align: center;">2.247433</td></tr> <tr><td style="text-align: center;">C</td><td style="text-align: center;">-8.668495</td><td style="text-align: center;">4.745495</td><td style="text-align: center;">-0.493170</td></tr> <tr><td style="text-align: center;">H</td><td style="text-align: center;">-7.742914</td><td style="text-align: center;">5.269455</td><td style="text-align: center;">-0.229928</td></tr> <tr><td style="text-align: center;">H</td><td style="text-align: center;">-9.428332</td><td style="text-align: center;">5.054916</td><td style="text-align: center;">0.248762</td></tr> <tr><td style="text-align: center;">H</td><td style="text-align: center;">-9.008942</td><td style="text-align: center;">5.127924</td><td style="text-align: center;">-1.463118</td></tr> <tr><td style="text-align: center;">C</td><td style="text-align: center;">-9.563638</td><td style="text-align: center;">2.419619</td><td style="text-align: center;">-1.146384</td></tr> <tr><td style="text-align: center;">H</td><td style="text-align: center;">-9.205430</td><td style="text-align: center;">1.411832</td><td style="text-align: center;">-1.387383</td></tr> <tr><td style="text-align: center;">H</td><td style="text-align: center;">-9.942710</td><td style="text-align: center;">2.877099</td><td style="text-align: center;">-2.068260</td></tr> <tr><td style="text-align: center;">H</td><td style="text-align: center;">-10.437895</td><td style="text-align: center;">2.292428</td><td style="text-align: center;">-0.480055</td></tr> <tr><td style="text-align: center;">C</td><td style="text-align: center;">-2.009898</td><td style="text-align: center;">-0.507978</td><td style="text-align: center;">0.266054</td></tr> <tr><td style="text-align: center;">H</td><td style="text-align: center;">-1.748733</td><td style="text-align: center;">0.181360</td><td style="text-align: center;">-0.538541</td></tr> <tr><td style="text-align: center;">H</td><td style="text-align: center;">-2.692542</td><td style="text-align: center;">-1.264093</td><td style="text-align: center;">-0.133635</td></tr> <tr><td style="text-align: center;">F</td><td style="text-align: center;">-1.001492</td><td style="text-align: center;">-2.086369</td><td style="text-align: center;">1.732471</td></tr> <tr><td style="text-align: center;">F</td><td style="text-align: center;">-0.249282</td><td style="text-align: center;">-1.971371</td><td style="text-align: center;">-0.318639</td></tr> <tr><td style="text-align: center;">F</td><td style="text-align: center;">0.232971</td><td style="text-align: center;">-0.401393</td><td style="text-align: center;">1.119607</td></tr> <tr><td style="text-align: center;">O</td><td style="text-align: center;">-3.738815</td><td style="text-align: center;">2.432050</td><td style="text-align: center;">0.594010</td></tr> </tbody> </table> |                                                                                   |                                                                                    | C         | -0.741258 | -1.232617 | 0.703845 | N | -2.650424 | 0.220541 | 1.348003 | S | -2.513145 | 1.879298 | 1.498449 | O | -2.773900 | 2.162275 | 2.907129 | O | -1.332652 | 2.363791 | 0.799796 | C | -5.104411 | 2.203731 | 1.070259 | H | -5.256918 | 1.123753 | 1.173569 | H | -5.212372 | 2.681169 | 2.047934 | C | -6.041995 | 2.807152 | 0.036945 | H | -5.809330 | 3.871599 | -0.074828 | H | -5.867518 | 2.333143 | -0.935310 | C | -7.522841 | 2.624689 | 0.447114 | H | -7.735218 | 1.551667 | 0.538828 | H | -7.656437 | 3.054391 | 1.455661 | C | -8.496270 | 3.256809 | -0.511761 | H | -2.738562 | -0.241078 | 2.247433 | C | -8.668495 | 4.745495 | -0.493170 | H | -7.742914 | 5.269455 | -0.229928 | H | -9.428332 | 5.054916 | 0.248762 | H | -9.008942 | 5.127924 | -1.463118 | C | -9.563638 | 2.419619 | -1.146384 | H | -9.205430 | 1.411832 | -1.387383 | H | -9.942710 | 2.877099 | -2.068260 | H | -10.437895 | 2.292428 | -0.480055 | C | -2.009898 | -0.507978 | 0.266054 | H | -1.748733 | 0.181360 | -0.538541 | H | -2.692542 | -1.264093 | -0.133635 | F | -1.001492 | -2.086369 | 1.732471 | F | -0.249282 | -1.971371 | -0.318639 | F | 0.232971 | -0.401393 | 1.119607 | O | -3.738815 | 2.432050 | 0.594010 |
| C                                                                                                                                                                                                                                                                                                                                                                                                                                                                                                                                                                                                                                                                                                                                                                                                                                                                                                                                                                                                                                                                                                                                                                                                                                                                                                                                                                                                                                                                                                                                                                                                                                                                                                                                                                                                                                                                                                                                                                                                                                                                                                                                                                                                                                                                                                                                                                                                                                                                                                                                                                                                                                                                                                                                                                                                                                                                                                                                                                                                                                                                                                                                                                                                                                                                                                                                                                                                                                                                                                                                                                                                                                                                                                                                                                                                                                                                                                                                                                                                                                                                                                                                                                                                                                                                                                                                                                                                                                                                                                                                                                                                                                                                                                                                                                                                                                                                                                                                                                                                                                                                                                                                                                                                                                                                                                                                                                                                                                                                                                                                                                                                                                                                                                                                                                                                                                                                                                                                                                                                                                             | -0.741258                                                                         | -1.232617                                                                          | 0.703845  |           |           |          |   |           |          |          |   |           |          |          |   |           |          |          |   |           |          |          |   |           |          |          |   |           |          |          |   |           |          |          |   |           |          |          |   |           |          |           |   |           |          |           |   |           |          |          |   |           |          |          |   |           |          |          |   |           |          |           |   |           |           |          |   |           |          |           |   |           |          |           |   |           |          |          |   |           |          |           |   |           |          |           |   |           |          |           |   |           |          |           |   |            |          |           |   |           |           |          |   |           |          |           |   |           |           |           |   |           |           |          |   |           |           |           |   |          |           |          |   |           |          |          |
| N                                                                                                                                                                                                                                                                                                                                                                                                                                                                                                                                                                                                                                                                                                                                                                                                                                                                                                                                                                                                                                                                                                                                                                                                                                                                                                                                                                                                                                                                                                                                                                                                                                                                                                                                                                                                                                                                                                                                                                                                                                                                                                                                                                                                                                                                                                                                                                                                                                                                                                                                                                                                                                                                                                                                                                                                                                                                                                                                                                                                                                                                                                                                                                                                                                                                                                                                                                                                                                                                                                                                                                                                                                                                                                                                                                                                                                                                                                                                                                                                                                                                                                                                                                                                                                                                                                                                                                                                                                                                                                                                                                                                                                                                                                                                                                                                                                                                                                                                                                                                                                                                                                                                                                                                                                                                                                                                                                                                                                                                                                                                                                                                                                                                                                                                                                                                                                                                                                                                                                                                                                             | -2.650424                                                                         | 0.220541                                                                           | 1.348003  |           |           |          |   |           |          |          |   |           |          |          |   |           |          |          |   |           |          |          |   |           |          |          |   |           |          |          |   |           |          |          |   |           |          |          |   |           |          |           |   |           |          |           |   |           |          |          |   |           |          |          |   |           |          |          |   |           |          |           |   |           |           |          |   |           |          |           |   |           |          |           |   |           |          |          |   |           |          |           |   |           |          |           |   |           |          |           |   |           |          |           |   |            |          |           |   |           |           |          |   |           |          |           |   |           |           |           |   |           |           |          |   |           |           |           |   |          |           |          |   |           |          |          |
| S                                                                                                                                                                                                                                                                                                                                                                                                                                                                                                                                                                                                                                                                                                                                                                                                                                                                                                                                                                                                                                                                                                                                                                                                                                                                                                                                                                                                                                                                                                                                                                                                                                                                                                                                                                                                                                                                                                                                                                                                                                                                                                                                                                                                                                                                                                                                                                                                                                                                                                                                                                                                                                                                                                                                                                                                                                                                                                                                                                                                                                                                                                                                                                                                                                                                                                                                                                                                                                                                                                                                                                                                                                                                                                                                                                                                                                                                                                                                                                                                                                                                                                                                                                                                                                                                                                                                                                                                                                                                                                                                                                                                                                                                                                                                                                                                                                                                                                                                                                                                                                                                                                                                                                                                                                                                                                                                                                                                                                                                                                                                                                                                                                                                                                                                                                                                                                                                                                                                                                                                                                             | -2.513145                                                                         | 1.879298                                                                           | 1.498449  |           |           |          |   |           |          |          |   |           |          |          |   |           |          |          |   |           |          |          |   |           |          |          |   |           |          |          |   |           |          |          |   |           |          |          |   |           |          |           |   |           |          |           |   |           |          |          |   |           |          |          |   |           |          |          |   |           |          |           |   |           |           |          |   |           |          |           |   |           |          |           |   |           |          |          |   |           |          |           |   |           |          |           |   |           |          |           |   |           |          |           |   |            |          |           |   |           |           |          |   |           |          |           |   |           |           |           |   |           |           |          |   |           |           |           |   |          |           |          |   |           |          |          |
| O                                                                                                                                                                                                                                                                                                                                                                                                                                                                                                                                                                                                                                                                                                                                                                                                                                                                                                                                                                                                                                                                                                                                                                                                                                                                                                                                                                                                                                                                                                                                                                                                                                                                                                                                                                                                                                                                                                                                                                                                                                                                                                                                                                                                                                                                                                                                                                                                                                                                                                                                                                                                                                                                                                                                                                                                                                                                                                                                                                                                                                                                                                                                                                                                                                                                                                                                                                                                                                                                                                                                                                                                                                                                                                                                                                                                                                                                                                                                                                                                                                                                                                                                                                                                                                                                                                                                                                                                                                                                                                                                                                                                                                                                                                                                                                                                                                                                                                                                                                                                                                                                                                                                                                                                                                                                                                                                                                                                                                                                                                                                                                                                                                                                                                                                                                                                                                                                                                                                                                                                                                             | -2.773900                                                                         | 2.162275                                                                           | 2.907129  |           |           |          |   |           |          |          |   |           |          |          |   |           |          |          |   |           |          |          |   |           |          |          |   |           |          |          |   |           |          |          |   |           |          |          |   |           |          |           |   |           |          |           |   |           |          |          |   |           |          |          |   |           |          |          |   |           |          |           |   |           |           |          |   |           |          |           |   |           |          |           |   |           |          |          |   |           |          |           |   |           |          |           |   |           |          |           |   |           |          |           |   |            |          |           |   |           |           |          |   |           |          |           |   |           |           |           |   |           |           |          |   |           |           |           |   |          |           |          |   |           |          |          |
| O                                                                                                                                                                                                                                                                                                                                                                                                                                                                                                                                                                                                                                                                                                                                                                                                                                                                                                                                                                                                                                                                                                                                                                                                                                                                                                                                                                                                                                                                                                                                                                                                                                                                                                                                                                                                                                                                                                                                                                                                                                                                                                                                                                                                                                                                                                                                                                                                                                                                                                                                                                                                                                                                                                                                                                                                                                                                                                                                                                                                                                                                                                                                                                                                                                                                                                                                                                                                                                                                                                                                                                                                                                                                                                                                                                                                                                                                                                                                                                                                                                                                                                                                                                                                                                                                                                                                                                                                                                                                                                                                                                                                                                                                                                                                                                                                                                                                                                                                                                                                                                                                                                                                                                                                                                                                                                                                                                                                                                                                                                                                                                                                                                                                                                                                                                                                                                                                                                                                                                                                                                             | -1.332652                                                                         | 2.363791                                                                           | 0.799796  |           |           |          |   |           |          |          |   |           |          |          |   |           |          |          |   |           |          |          |   |           |          |          |   |           |          |          |   |           |          |          |   |           |          |          |   |           |          |           |   |           |          |           |   |           |          |          |   |           |          |          |   |           |          |          |   |           |          |           |   |           |           |          |   |           |          |           |   |           |          |           |   |           |          |          |   |           |          |           |   |           |          |           |   |           |          |           |   |           |          |           |   |            |          |           |   |           |           |          |   |           |          |           |   |           |           |           |   |           |           |          |   |           |           |           |   |          |           |          |   |           |          |          |
| C                                                                                                                                                                                                                                                                                                                                                                                                                                                                                                                                                                                                                                                                                                                                                                                                                                                                                                                                                                                                                                                                                                                                                                                                                                                                                                                                                                                                                                                                                                                                                                                                                                                                                                                                                                                                                                                                                                                                                                                                                                                                                                                                                                                                                                                                                                                                                                                                                                                                                                                                                                                                                                                                                                                                                                                                                                                                                                                                                                                                                                                                                                                                                                                                                                                                                                                                                                                                                                                                                                                                                                                                                                                                                                                                                                                                                                                                                                                                                                                                                                                                                                                                                                                                                                                                                                                                                                                                                                                                                                                                                                                                                                                                                                                                                                                                                                                                                                                                                                                                                                                                                                                                                                                                                                                                                                                                                                                                                                                                                                                                                                                                                                                                                                                                                                                                                                                                                                                                                                                                                                             | -5.104411                                                                         | 2.203731                                                                           | 1.070259  |           |           |          |   |           |          |          |   |           |          |          |   |           |          |          |   |           |          |          |   |           |          |          |   |           |          |          |   |           |          |          |   |           |          |          |   |           |          |           |   |           |          |           |   |           |          |          |   |           |          |          |   |           |          |          |   |           |          |           |   |           |           |          |   |           |          |           |   |           |          |           |   |           |          |          |   |           |          |           |   |           |          |           |   |           |          |           |   |           |          |           |   |            |          |           |   |           |           |          |   |           |          |           |   |           |           |           |   |           |           |          |   |           |           |           |   |          |           |          |   |           |          |          |
| H                                                                                                                                                                                                                                                                                                                                                                                                                                                                                                                                                                                                                                                                                                                                                                                                                                                                                                                                                                                                                                                                                                                                                                                                                                                                                                                                                                                                                                                                                                                                                                                                                                                                                                                                                                                                                                                                                                                                                                                                                                                                                                                                                                                                                                                                                                                                                                                                                                                                                                                                                                                                                                                                                                                                                                                                                                                                                                                                                                                                                                                                                                                                                                                                                                                                                                                                                                                                                                                                                                                                                                                                                                                                                                                                                                                                                                                                                                                                                                                                                                                                                                                                                                                                                                                                                                                                                                                                                                                                                                                                                                                                                                                                                                                                                                                                                                                                                                                                                                                                                                                                                                                                                                                                                                                                                                                                                                                                                                                                                                                                                                                                                                                                                                                                                                                                                                                                                                                                                                                                                                             | -5.256918                                                                         | 1.123753                                                                           | 1.173569  |           |           |          |   |           |          |          |   |           |          |          |   |           |          |          |   |           |          |          |   |           |          |          |   |           |          |          |   |           |          |          |   |           |          |          |   |           |          |           |   |           |          |           |   |           |          |          |   |           |          |          |   |           |          |          |   |           |          |           |   |           |           |          |   |           |          |           |   |           |          |           |   |           |          |          |   |           |          |           |   |           |          |           |   |           |          |           |   |           |          |           |   |            |          |           |   |           |           |          |   |           |          |           |   |           |           |           |   |           |           |          |   |           |           |           |   |          |           |          |   |           |          |          |
| H                                                                                                                                                                                                                                                                                                                                                                                                                                                                                                                                                                                                                                                                                                                                                                                                                                                                                                                                                                                                                                                                                                                                                                                                                                                                                                                                                                                                                                                                                                                                                                                                                                                                                                                                                                                                                                                                                                                                                                                                                                                                                                                                                                                                                                                                                                                                                                                                                                                                                                                                                                                                                                                                                                                                                                                                                                                                                                                                                                                                                                                                                                                                                                                                                                                                                                                                                                                                                                                                                                                                                                                                                                                                                                                                                                                                                                                                                                                                                                                                                                                                                                                                                                                                                                                                                                                                                                                                                                                                                                                                                                                                                                                                                                                                                                                                                                                                                                                                                                                                                                                                                                                                                                                                                                                                                                                                                                                                                                                                                                                                                                                                                                                                                                                                                                                                                                                                                                                                                                                                                                             | -5.212372                                                                         | 2.681169                                                                           | 2.047934  |           |           |          |   |           |          |          |   |           |          |          |   |           |          |          |   |           |          |          |   |           |          |          |   |           |          |          |   |           |          |          |   |           |          |          |   |           |          |           |   |           |          |           |   |           |          |          |   |           |          |          |   |           |          |          |   |           |          |           |   |           |           |          |   |           |          |           |   |           |          |           |   |           |          |          |   |           |          |           |   |           |          |           |   |           |          |           |   |           |          |           |   |            |          |           |   |           |           |          |   |           |          |           |   |           |           |           |   |           |           |          |   |           |           |           |   |          |           |          |   |           |          |          |
| C                                                                                                                                                                                                                                                                                                                                                                                                                                                                                                                                                                                                                                                                                                                                                                                                                                                                                                                                                                                                                                                                                                                                                                                                                                                                                                                                                                                                                                                                                                                                                                                                                                                                                                                                                                                                                                                                                                                                                                                                                                                                                                                                                                                                                                                                                                                                                                                                                                                                                                                                                                                                                                                                                                                                                                                                                                                                                                                                                                                                                                                                                                                                                                                                                                                                                                                                                                                                                                                                                                                                                                                                                                                                                                                                                                                                                                                                                                                                                                                                                                                                                                                                                                                                                                                                                                                                                                                                                                                                                                                                                                                                                                                                                                                                                                                                                                                                                                                                                                                                                                                                                                                                                                                                                                                                                                                                                                                                                                                                                                                                                                                                                                                                                                                                                                                                                                                                                                                                                                                                                                             | -6.041995                                                                         | 2.807152                                                                           | 0.036945  |           |           |          |   |           |          |          |   |           |          |          |   |           |          |          |   |           |          |          |   |           |          |          |   |           |          |          |   |           |          |          |   |           |          |          |   |           |          |           |   |           |          |           |   |           |          |          |   |           |          |          |   |           |          |          |   |           |          |           |   |           |           |          |   |           |          |           |   |           |          |           |   |           |          |          |   |           |          |           |   |           |          |           |   |           |          |           |   |           |          |           |   |            |          |           |   |           |           |          |   |           |          |           |   |           |           |           |   |           |           |          |   |           |           |           |   |          |           |          |   |           |          |          |
| H                                                                                                                                                                                                                                                                                                                                                                                                                                                                                                                                                                                                                                                                                                                                                                                                                                                                                                                                                                                                                                                                                                                                                                                                                                                                                                                                                                                                                                                                                                                                                                                                                                                                                                                                                                                                                                                                                                                                                                                                                                                                                                                                                                                                                                                                                                                                                                                                                                                                                                                                                                                                                                                                                                                                                                                                                                                                                                                                                                                                                                                                                                                                                                                                                                                                                                                                                                                                                                                                                                                                                                                                                                                                                                                                                                                                                                                                                                                                                                                                                                                                                                                                                                                                                                                                                                                                                                                                                                                                                                                                                                                                                                                                                                                                                                                                                                                                                                                                                                                                                                                                                                                                                                                                                                                                                                                                                                                                                                                                                                                                                                                                                                                                                                                                                                                                                                                                                                                                                                                                                                             | -5.809330                                                                         | 3.871599                                                                           | -0.074828 |           |           |          |   |           |          |          |   |           |          |          |   |           |          |          |   |           |          |          |   |           |          |          |   |           |          |          |   |           |          |          |   |           |          |          |   |           |          |           |   |           |          |           |   |           |          |          |   |           |          |          |   |           |          |          |   |           |          |           |   |           |           |          |   |           |          |           |   |           |          |           |   |           |          |          |   |           |          |           |   |           |          |           |   |           |          |           |   |           |          |           |   |            |          |           |   |           |           |          |   |           |          |           |   |           |           |           |   |           |           |          |   |           |           |           |   |          |           |          |   |           |          |          |
| H                                                                                                                                                                                                                                                                                                                                                                                                                                                                                                                                                                                                                                                                                                                                                                                                                                                                                                                                                                                                                                                                                                                                                                                                                                                                                                                                                                                                                                                                                                                                                                                                                                                                                                                                                                                                                                                                                                                                                                                                                                                                                                                                                                                                                                                                                                                                                                                                                                                                                                                                                                                                                                                                                                                                                                                                                                                                                                                                                                                                                                                                                                                                                                                                                                                                                                                                                                                                                                                                                                                                                                                                                                                                                                                                                                                                                                                                                                                                                                                                                                                                                                                                                                                                                                                                                                                                                                                                                                                                                                                                                                                                                                                                                                                                                                                                                                                                                                                                                                                                                                                                                                                                                                                                                                                                                                                                                                                                                                                                                                                                                                                                                                                                                                                                                                                                                                                                                                                                                                                                                                             | -5.867518                                                                         | 2.333143                                                                           | -0.935310 |           |           |          |   |           |          |          |   |           |          |          |   |           |          |          |   |           |          |          |   |           |          |          |   |           |          |          |   |           |          |          |   |           |          |          |   |           |          |           |   |           |          |           |   |           |          |          |   |           |          |          |   |           |          |          |   |           |          |           |   |           |           |          |   |           |          |           |   |           |          |           |   |           |          |          |   |           |          |           |   |           |          |           |   |           |          |           |   |           |          |           |   |            |          |           |   |           |           |          |   |           |          |           |   |           |           |           |   |           |           |          |   |           |           |           |   |          |           |          |   |           |          |          |
| C                                                                                                                                                                                                                                                                                                                                                                                                                                                                                                                                                                                                                                                                                                                                                                                                                                                                                                                                                                                                                                                                                                                                                                                                                                                                                                                                                                                                                                                                                                                                                                                                                                                                                                                                                                                                                                                                                                                                                                                                                                                                                                                                                                                                                                                                                                                                                                                                                                                                                                                                                                                                                                                                                                                                                                                                                                                                                                                                                                                                                                                                                                                                                                                                                                                                                                                                                                                                                                                                                                                                                                                                                                                                                                                                                                                                                                                                                                                                                                                                                                                                                                                                                                                                                                                                                                                                                                                                                                                                                                                                                                                                                                                                                                                                                                                                                                                                                                                                                                                                                                                                                                                                                                                                                                                                                                                                                                                                                                                                                                                                                                                                                                                                                                                                                                                                                                                                                                                                                                                                                                             | -7.522841                                                                         | 2.624689                                                                           | 0.447114  |           |           |          |   |           |          |          |   |           |          |          |   |           |          |          |   |           |          |          |   |           |          |          |   |           |          |          |   |           |          |          |   |           |          |          |   |           |          |           |   |           |          |           |   |           |          |          |   |           |          |          |   |           |          |          |   |           |          |           |   |           |           |          |   |           |          |           |   |           |          |           |   |           |          |          |   |           |          |           |   |           |          |           |   |           |          |           |   |           |          |           |   |            |          |           |   |           |           |          |   |           |          |           |   |           |           |           |   |           |           |          |   |           |           |           |   |          |           |          |   |           |          |          |
| H                                                                                                                                                                                                                                                                                                                                                                                                                                                                                                                                                                                                                                                                                                                                                                                                                                                                                                                                                                                                                                                                                                                                                                                                                                                                                                                                                                                                                                                                                                                                                                                                                                                                                                                                                                                                                                                                                                                                                                                                                                                                                                                                                                                                                                                                                                                                                                                                                                                                                                                                                                                                                                                                                                                                                                                                                                                                                                                                                                                                                                                                                                                                                                                                                                                                                                                                                                                                                                                                                                                                                                                                                                                                                                                                                                                                                                                                                                                                                                                                                                                                                                                                                                                                                                                                                                                                                                                                                                                                                                                                                                                                                                                                                                                                                                                                                                                                                                                                                                                                                                                                                                                                                                                                                                                                                                                                                                                                                                                                                                                                                                                                                                                                                                                                                                                                                                                                                                                                                                                                                                             | -7.735218                                                                         | 1.551667                                                                           | 0.538828  |           |           |          |   |           |          |          |   |           |          |          |   |           |          |          |   |           |          |          |   |           |          |          |   |           |          |          |   |           |          |          |   |           |          |          |   |           |          |           |   |           |          |           |   |           |          |          |   |           |          |          |   |           |          |          |   |           |          |           |   |           |           |          |   |           |          |           |   |           |          |           |   |           |          |          |   |           |          |           |   |           |          |           |   |           |          |           |   |           |          |           |   |            |          |           |   |           |           |          |   |           |          |           |   |           |           |           |   |           |           |          |   |           |           |           |   |          |           |          |   |           |          |          |
| H                                                                                                                                                                                                                                                                                                                                                                                                                                                                                                                                                                                                                                                                                                                                                                                                                                                                                                                                                                                                                                                                                                                                                                                                                                                                                                                                                                                                                                                                                                                                                                                                                                                                                                                                                                                                                                                                                                                                                                                                                                                                                                                                                                                                                                                                                                                                                                                                                                                                                                                                                                                                                                                                                                                                                                                                                                                                                                                                                                                                                                                                                                                                                                                                                                                                                                                                                                                                                                                                                                                                                                                                                                                                                                                                                                                                                                                                                                                                                                                                                                                                                                                                                                                                                                                                                                                                                                                                                                                                                                                                                                                                                                                                                                                                                                                                                                                                                                                                                                                                                                                                                                                                                                                                                                                                                                                                                                                                                                                                                                                                                                                                                                                                                                                                                                                                                                                                                                                                                                                                                                             | -7.656437                                                                         | 3.054391                                                                           | 1.455661  |           |           |          |   |           |          |          |   |           |          |          |   |           |          |          |   |           |          |          |   |           |          |          |   |           |          |          |   |           |          |          |   |           |          |          |   |           |          |           |   |           |          |           |   |           |          |          |   |           |          |          |   |           |          |          |   |           |          |           |   |           |           |          |   |           |          |           |   |           |          |           |   |           |          |          |   |           |          |           |   |           |          |           |   |           |          |           |   |           |          |           |   |            |          |           |   |           |           |          |   |           |          |           |   |           |           |           |   |           |           |          |   |           |           |           |   |          |           |          |   |           |          |          |
| C                                                                                                                                                                                                                                                                                                                                                                                                                                                                                                                                                                                                                                                                                                                                                                                                                                                                                                                                                                                                                                                                                                                                                                                                                                                                                                                                                                                                                                                                                                                                                                                                                                                                                                                                                                                                                                                                                                                                                                                                                                                                                                                                                                                                                                                                                                                                                                                                                                                                                                                                                                                                                                                                                                                                                                                                                                                                                                                                                                                                                                                                                                                                                                                                                                                                                                                                                                                                                                                                                                                                                                                                                                                                                                                                                                                                                                                                                                                                                                                                                                                                                                                                                                                                                                                                                                                                                                                                                                                                                                                                                                                                                                                                                                                                                                                                                                                                                                                                                                                                                                                                                                                                                                                                                                                                                                                                                                                                                                                                                                                                                                                                                                                                                                                                                                                                                                                                                                                                                                                                                                             | -8.496270                                                                         | 3.256809                                                                           | -0.511761 |           |           |          |   |           |          |          |   |           |          |          |   |           |          |          |   |           |          |          |   |           |          |          |   |           |          |          |   |           |          |          |   |           |          |          |   |           |          |           |   |           |          |           |   |           |          |          |   |           |          |          |   |           |          |          |   |           |          |           |   |           |           |          |   |           |          |           |   |           |          |           |   |           |          |          |   |           |          |           |   |           |          |           |   |           |          |           |   |           |          |           |   |            |          |           |   |           |           |          |   |           |          |           |   |           |           |           |   |           |           |          |   |           |           |           |   |          |           |          |   |           |          |          |
| H                                                                                                                                                                                                                                                                                                                                                                                                                                                                                                                                                                                                                                                                                                                                                                                                                                                                                                                                                                                                                                                                                                                                                                                                                                                                                                                                                                                                                                                                                                                                                                                                                                                                                                                                                                                                                                                                                                                                                                                                                                                                                                                                                                                                                                                                                                                                                                                                                                                                                                                                                                                                                                                                                                                                                                                                                                                                                                                                                                                                                                                                                                                                                                                                                                                                                                                                                                                                                                                                                                                                                                                                                                                                                                                                                                                                                                                                                                                                                                                                                                                                                                                                                                                                                                                                                                                                                                                                                                                                                                                                                                                                                                                                                                                                                                                                                                                                                                                                                                                                                                                                                                                                                                                                                                                                                                                                                                                                                                                                                                                                                                                                                                                                                                                                                                                                                                                                                                                                                                                                                                             | -2.738562                                                                         | -0.241078                                                                          | 2.247433  |           |           |          |   |           |          |          |   |           |          |          |   |           |          |          |   |           |          |          |   |           |          |          |   |           |          |          |   |           |          |          |   |           |          |          |   |           |          |           |   |           |          |           |   |           |          |          |   |           |          |          |   |           |          |          |   |           |          |           |   |           |           |          |   |           |          |           |   |           |          |           |   |           |          |          |   |           |          |           |   |           |          |           |   |           |          |           |   |           |          |           |   |            |          |           |   |           |           |          |   |           |          |           |   |           |           |           |   |           |           |          |   |           |           |           |   |          |           |          |   |           |          |          |
| C                                                                                                                                                                                                                                                                                                                                                                                                                                                                                                                                                                                                                                                                                                                                                                                                                                                                                                                                                                                                                                                                                                                                                                                                                                                                                                                                                                                                                                                                                                                                                                                                                                                                                                                                                                                                                                                                                                                                                                                                                                                                                                                                                                                                                                                                                                                                                                                                                                                                                                                                                                                                                                                                                                                                                                                                                                                                                                                                                                                                                                                                                                                                                                                                                                                                                                                                                                                                                                                                                                                                                                                                                                                                                                                                                                                                                                                                                                                                                                                                                                                                                                                                                                                                                                                                                                                                                                                                                                                                                                                                                                                                                                                                                                                                                                                                                                                                                                                                                                                                                                                                                                                                                                                                                                                                                                                                                                                                                                                                                                                                                                                                                                                                                                                                                                                                                                                                                                                                                                                                                                             | -8.668495                                                                         | 4.745495                                                                           | -0.493170 |           |           |          |   |           |          |          |   |           |          |          |   |           |          |          |   |           |          |          |   |           |          |          |   |           |          |          |   |           |          |          |   |           |          |          |   |           |          |           |   |           |          |           |   |           |          |          |   |           |          |          |   |           |          |          |   |           |          |           |   |           |           |          |   |           |          |           |   |           |          |           |   |           |          |          |   |           |          |           |   |           |          |           |   |           |          |           |   |           |          |           |   |            |          |           |   |           |           |          |   |           |          |           |   |           |           |           |   |           |           |          |   |           |           |           |   |          |           |          |   |           |          |          |
| H                                                                                                                                                                                                                                                                                                                                                                                                                                                                                                                                                                                                                                                                                                                                                                                                                                                                                                                                                                                                                                                                                                                                                                                                                                                                                                                                                                                                                                                                                                                                                                                                                                                                                                                                                                                                                                                                                                                                                                                                                                                                                                                                                                                                                                                                                                                                                                                                                                                                                                                                                                                                                                                                                                                                                                                                                                                                                                                                                                                                                                                                                                                                                                                                                                                                                                                                                                                                                                                                                                                                                                                                                                                                                                                                                                                                                                                                                                                                                                                                                                                                                                                                                                                                                                                                                                                                                                                                                                                                                                                                                                                                                                                                                                                                                                                                                                                                                                                                                                                                                                                                                                                                                                                                                                                                                                                                                                                                                                                                                                                                                                                                                                                                                                                                                                                                                                                                                                                                                                                                                                             | -7.742914                                                                         | 5.269455                                                                           | -0.229928 |           |           |          |   |           |          |          |   |           |          |          |   |           |          |          |   |           |          |          |   |           |          |          |   |           |          |          |   |           |          |          |   |           |          |          |   |           |          |           |   |           |          |           |   |           |          |          |   |           |          |          |   |           |          |          |   |           |          |           |   |           |           |          |   |           |          |           |   |           |          |           |   |           |          |          |   |           |          |           |   |           |          |           |   |           |          |           |   |           |          |           |   |            |          |           |   |           |           |          |   |           |          |           |   |           |           |           |   |           |           |          |   |           |           |           |   |          |           |          |   |           |          |          |
| H                                                                                                                                                                                                                                                                                                                                                                                                                                                                                                                                                                                                                                                                                                                                                                                                                                                                                                                                                                                                                                                                                                                                                                                                                                                                                                                                                                                                                                                                                                                                                                                                                                                                                                                                                                                                                                                                                                                                                                                                                                                                                                                                                                                                                                                                                                                                                                                                                                                                                                                                                                                                                                                                                                                                                                                                                                                                                                                                                                                                                                                                                                                                                                                                                                                                                                                                                                                                                                                                                                                                                                                                                                                                                                                                                                                                                                                                                                                                                                                                                                                                                                                                                                                                                                                                                                                                                                                                                                                                                                                                                                                                                                                                                                                                                                                                                                                                                                                                                                                                                                                                                                                                                                                                                                                                                                                                                                                                                                                                                                                                                                                                                                                                                                                                                                                                                                                                                                                                                                                                                                             | -9.428332                                                                         | 5.054916                                                                           | 0.248762  |           |           |          |   |           |          |          |   |           |          |          |   |           |          |          |   |           |          |          |   |           |          |          |   |           |          |          |   |           |          |          |   |           |          |          |   |           |          |           |   |           |          |           |   |           |          |          |   |           |          |          |   |           |          |          |   |           |          |           |   |           |           |          |   |           |          |           |   |           |          |           |   |           |          |          |   |           |          |           |   |           |          |           |   |           |          |           |   |           |          |           |   |            |          |           |   |           |           |          |   |           |          |           |   |           |           |           |   |           |           |          |   |           |           |           |   |          |           |          |   |           |          |          |
| H                                                                                                                                                                                                                                                                                                                                                                                                                                                                                                                                                                                                                                                                                                                                                                                                                                                                                                                                                                                                                                                                                                                                                                                                                                                                                                                                                                                                                                                                                                                                                                                                                                                                                                                                                                                                                                                                                                                                                                                                                                                                                                                                                                                                                                                                                                                                                                                                                                                                                                                                                                                                                                                                                                                                                                                                                                                                                                                                                                                                                                                                                                                                                                                                                                                                                                                                                                                                                                                                                                                                                                                                                                                                                                                                                                                                                                                                                                                                                                                                                                                                                                                                                                                                                                                                                                                                                                                                                                                                                                                                                                                                                                                                                                                                                                                                                                                                                                                                                                                                                                                                                                                                                                                                                                                                                                                                                                                                                                                                                                                                                                                                                                                                                                                                                                                                                                                                                                                                                                                                                                             | -9.008942                                                                         | 5.127924                                                                           | -1.463118 |           |           |          |   |           |          |          |   |           |          |          |   |           |          |          |   |           |          |          |   |           |          |          |   |           |          |          |   |           |          |          |   |           |          |          |   |           |          |           |   |           |          |           |   |           |          |          |   |           |          |          |   |           |          |          |   |           |          |           |   |           |           |          |   |           |          |           |   |           |          |           |   |           |          |          |   |           |          |           |   |           |          |           |   |           |          |           |   |           |          |           |   |            |          |           |   |           |           |          |   |           |          |           |   |           |           |           |   |           |           |          |   |           |           |           |   |          |           |          |   |           |          |          |
| C                                                                                                                                                                                                                                                                                                                                                                                                                                                                                                                                                                                                                                                                                                                                                                                                                                                                                                                                                                                                                                                                                                                                                                                                                                                                                                                                                                                                                                                                                                                                                                                                                                                                                                                                                                                                                                                                                                                                                                                                                                                                                                                                                                                                                                                                                                                                                                                                                                                                                                                                                                                                                                                                                                                                                                                                                                                                                                                                                                                                                                                                                                                                                                                                                                                                                                                                                                                                                                                                                                                                                                                                                                                                                                                                                                                                                                                                                                                                                                                                                                                                                                                                                                                                                                                                                                                                                                                                                                                                                                                                                                                                                                                                                                                                                                                                                                                                                                                                                                                                                                                                                                                                                                                                                                                                                                                                                                                                                                                                                                                                                                                                                                                                                                                                                                                                                                                                                                                                                                                                                                             | -9.563638                                                                         | 2.419619                                                                           | -1.146384 |           |           |          |   |           |          |          |   |           |          |          |   |           |          |          |   |           |          |          |   |           |          |          |   |           |          |          |   |           |          |          |   |           |          |          |   |           |          |           |   |           |          |           |   |           |          |          |   |           |          |          |   |           |          |          |   |           |          |           |   |           |           |          |   |           |          |           |   |           |          |           |   |           |          |          |   |           |          |           |   |           |          |           |   |           |          |           |   |           |          |           |   |            |          |           |   |           |           |          |   |           |          |           |   |           |           |           |   |           |           |          |   |           |           |           |   |          |           |          |   |           |          |          |
| H                                                                                                                                                                                                                                                                                                                                                                                                                                                                                                                                                                                                                                                                                                                                                                                                                                                                                                                                                                                                                                                                                                                                                                                                                                                                                                                                                                                                                                                                                                                                                                                                                                                                                                                                                                                                                                                                                                                                                                                                                                                                                                                                                                                                                                                                                                                                                                                                                                                                                                                                                                                                                                                                                                                                                                                                                                                                                                                                                                                                                                                                                                                                                                                                                                                                                                                                                                                                                                                                                                                                                                                                                                                                                                                                                                                                                                                                                                                                                                                                                                                                                                                                                                                                                                                                                                                                                                                                                                                                                                                                                                                                                                                                                                                                                                                                                                                                                                                                                                                                                                                                                                                                                                                                                                                                                                                                                                                                                                                                                                                                                                                                                                                                                                                                                                                                                                                                                                                                                                                                                                             | -9.205430                                                                         | 1.411832                                                                           | -1.387383 |           |           |          |   |           |          |          |   |           |          |          |   |           |          |          |   |           |          |          |   |           |          |          |   |           |          |          |   |           |          |          |   |           |          |          |   |           |          |           |   |           |          |           |   |           |          |          |   |           |          |          |   |           |          |          |   |           |          |           |   |           |           |          |   |           |          |           |   |           |          |           |   |           |          |          |   |           |          |           |   |           |          |           |   |           |          |           |   |           |          |           |   |            |          |           |   |           |           |          |   |           |          |           |   |           |           |           |   |           |           |          |   |           |           |           |   |          |           |          |   |           |          |          |
| H                                                                                                                                                                                                                                                                                                                                                                                                                                                                                                                                                                                                                                                                                                                                                                                                                                                                                                                                                                                                                                                                                                                                                                                                                                                                                                                                                                                                                                                                                                                                                                                                                                                                                                                                                                                                                                                                                                                                                                                                                                                                                                                                                                                                                                                                                                                                                                                                                                                                                                                                                                                                                                                                                                                                                                                                                                                                                                                                                                                                                                                                                                                                                                                                                                                                                                                                                                                                                                                                                                                                                                                                                                                                                                                                                                                                                                                                                                                                                                                                                                                                                                                                                                                                                                                                                                                                                                                                                                                                                                                                                                                                                                                                                                                                                                                                                                                                                                                                                                                                                                                                                                                                                                                                                                                                                                                                                                                                                                                                                                                                                                                                                                                                                                                                                                                                                                                                                                                                                                                                                                             | -9.942710                                                                         | 2.877099                                                                           | -2.068260 |           |           |          |   |           |          |          |   |           |          |          |   |           |          |          |   |           |          |          |   |           |          |          |   |           |          |          |   |           |          |          |   |           |          |          |   |           |          |           |   |           |          |           |   |           |          |          |   |           |          |          |   |           |          |          |   |           |          |           |   |           |           |          |   |           |          |           |   |           |          |           |   |           |          |          |   |           |          |           |   |           |          |           |   |           |          |           |   |           |          |           |   |            |          |           |   |           |           |          |   |           |          |           |   |           |           |           |   |           |           |          |   |           |           |           |   |          |           |          |   |           |          |          |
| H                                                                                                                                                                                                                                                                                                                                                                                                                                                                                                                                                                                                                                                                                                                                                                                                                                                                                                                                                                                                                                                                                                                                                                                                                                                                                                                                                                                                                                                                                                                                                                                                                                                                                                                                                                                                                                                                                                                                                                                                                                                                                                                                                                                                                                                                                                                                                                                                                                                                                                                                                                                                                                                                                                                                                                                                                                                                                                                                                                                                                                                                                                                                                                                                                                                                                                                                                                                                                                                                                                                                                                                                                                                                                                                                                                                                                                                                                                                                                                                                                                                                                                                                                                                                                                                                                                                                                                                                                                                                                                                                                                                                                                                                                                                                                                                                                                                                                                                                                                                                                                                                                                                                                                                                                                                                                                                                                                                                                                                                                                                                                                                                                                                                                                                                                                                                                                                                                                                                                                                                                                             | -10.437895                                                                        | 2.292428                                                                           | -0.480055 |           |           |          |   |           |          |          |   |           |          |          |   |           |          |          |   |           |          |          |   |           |          |          |   |           |          |          |   |           |          |          |   |           |          |          |   |           |          |           |   |           |          |           |   |           |          |          |   |           |          |          |   |           |          |          |   |           |          |           |   |           |           |          |   |           |          |           |   |           |          |           |   |           |          |          |   |           |          |           |   |           |          |           |   |           |          |           |   |           |          |           |   |            |          |           |   |           |           |          |   |           |          |           |   |           |           |           |   |           |           |          |   |           |           |           |   |          |           |          |   |           |          |          |
| C                                                                                                                                                                                                                                                                                                                                                                                                                                                                                                                                                                                                                                                                                                                                                                                                                                                                                                                                                                                                                                                                                                                                                                                                                                                                                                                                                                                                                                                                                                                                                                                                                                                                                                                                                                                                                                                                                                                                                                                                                                                                                                                                                                                                                                                                                                                                                                                                                                                                                                                                                                                                                                                                                                                                                                                                                                                                                                                                                                                                                                                                                                                                                                                                                                                                                                                                                                                                                                                                                                                                                                                                                                                                                                                                                                                                                                                                                                                                                                                                                                                                                                                                                                                                                                                                                                                                                                                                                                                                                                                                                                                                                                                                                                                                                                                                                                                                                                                                                                                                                                                                                                                                                                                                                                                                                                                                                                                                                                                                                                                                                                                                                                                                                                                                                                                                                                                                                                                                                                                                                                             | -2.009898                                                                         | -0.507978                                                                          | 0.266054  |           |           |          |   |           |          |          |   |           |          |          |   |           |          |          |   |           |          |          |   |           |          |          |   |           |          |          |   |           |          |          |   |           |          |          |   |           |          |           |   |           |          |           |   |           |          |          |   |           |          |          |   |           |          |          |   |           |          |           |   |           |           |          |   |           |          |           |   |           |          |           |   |           |          |          |   |           |          |           |   |           |          |           |   |           |          |           |   |           |          |           |   |            |          |           |   |           |           |          |   |           |          |           |   |           |           |           |   |           |           |          |   |           |           |           |   |          |           |          |   |           |          |          |
| H                                                                                                                                                                                                                                                                                                                                                                                                                                                                                                                                                                                                                                                                                                                                                                                                                                                                                                                                                                                                                                                                                                                                                                                                                                                                                                                                                                                                                                                                                                                                                                                                                                                                                                                                                                                                                                                                                                                                                                                                                                                                                                                                                                                                                                                                                                                                                                                                                                                                                                                                                                                                                                                                                                                                                                                                                                                                                                                                                                                                                                                                                                                                                                                                                                                                                                                                                                                                                                                                                                                                                                                                                                                                                                                                                                                                                                                                                                                                                                                                                                                                                                                                                                                                                                                                                                                                                                                                                                                                                                                                                                                                                                                                                                                                                                                                                                                                                                                                                                                                                                                                                                                                                                                                                                                                                                                                                                                                                                                                                                                                                                                                                                                                                                                                                                                                                                                                                                                                                                                                                                             | -1.748733                                                                         | 0.181360                                                                           | -0.538541 |           |           |          |   |           |          |          |   |           |          |          |   |           |          |          |   |           |          |          |   |           |          |          |   |           |          |          |   |           |          |          |   |           |          |          |   |           |          |           |   |           |          |           |   |           |          |          |   |           |          |          |   |           |          |          |   |           |          |           |   |           |           |          |   |           |          |           |   |           |          |           |   |           |          |          |   |           |          |           |   |           |          |           |   |           |          |           |   |           |          |           |   |            |          |           |   |           |           |          |   |           |          |           |   |           |           |           |   |           |           |          |   |           |           |           |   |          |           |          |   |           |          |          |
| H                                                                                                                                                                                                                                                                                                                                                                                                                                                                                                                                                                                                                                                                                                                                                                                                                                                                                                                                                                                                                                                                                                                                                                                                                                                                                                                                                                                                                                                                                                                                                                                                                                                                                                                                                                                                                                                                                                                                                                                                                                                                                                                                                                                                                                                                                                                                                                                                                                                                                                                                                                                                                                                                                                                                                                                                                                                                                                                                                                                                                                                                                                                                                                                                                                                                                                                                                                                                                                                                                                                                                                                                                                                                                                                                                                                                                                                                                                                                                                                                                                                                                                                                                                                                                                                                                                                                                                                                                                                                                                                                                                                                                                                                                                                                                                                                                                                                                                                                                                                                                                                                                                                                                                                                                                                                                                                                                                                                                                                                                                                                                                                                                                                                                                                                                                                                                                                                                                                                                                                                                                             | -2.692542                                                                         | -1.264093                                                                          | -0.133635 |           |           |          |   |           |          |          |   |           |          |          |   |           |          |          |   |           |          |          |   |           |          |          |   |           |          |          |   |           |          |          |   |           |          |          |   |           |          |           |   |           |          |           |   |           |          |          |   |           |          |          |   |           |          |          |   |           |          |           |   |           |           |          |   |           |          |           |   |           |          |           |   |           |          |          |   |           |          |           |   |           |          |           |   |           |          |           |   |           |          |           |   |            |          |           |   |           |           |          |   |           |          |           |   |           |           |           |   |           |           |          |   |           |           |           |   |          |           |          |   |           |          |          |
| F                                                                                                                                                                                                                                                                                                                                                                                                                                                                                                                                                                                                                                                                                                                                                                                                                                                                                                                                                                                                                                                                                                                                                                                                                                                                                                                                                                                                                                                                                                                                                                                                                                                                                                                                                                                                                                                                                                                                                                                                                                                                                                                                                                                                                                                                                                                                                                                                                                                                                                                                                                                                                                                                                                                                                                                                                                                                                                                                                                                                                                                                                                                                                                                                                                                                                                                                                                                                                                                                                                                                                                                                                                                                                                                                                                                                                                                                                                                                                                                                                                                                                                                                                                                                                                                                                                                                                                                                                                                                                                                                                                                                                                                                                                                                                                                                                                                                                                                                                                                                                                                                                                                                                                                                                                                                                                                                                                                                                                                                                                                                                                                                                                                                                                                                                                                                                                                                                                                                                                                                                                             | -1.001492                                                                         | -2.086369                                                                          | 1.732471  |           |           |          |   |           |          |          |   |           |          |          |   |           |          |          |   |           |          |          |   |           |          |          |   |           |          |          |   |           |          |          |   |           |          |          |   |           |          |           |   |           |          |           |   |           |          |          |   |           |          |          |   |           |          |          |   |           |          |           |   |           |           |          |   |           |          |           |   |           |          |           |   |           |          |          |   |           |          |           |   |           |          |           |   |           |          |           |   |           |          |           |   |            |          |           |   |           |           |          |   |           |          |           |   |           |           |           |   |           |           |          |   |           |           |           |   |          |           |          |   |           |          |          |
| F                                                                                                                                                                                                                                                                                                                                                                                                                                                                                                                                                                                                                                                                                                                                                                                                                                                                                                                                                                                                                                                                                                                                                                                                                                                                                                                                                                                                                                                                                                                                                                                                                                                                                                                                                                                                                                                                                                                                                                                                                                                                                                                                                                                                                                                                                                                                                                                                                                                                                                                                                                                                                                                                                                                                                                                                                                                                                                                                                                                                                                                                                                                                                                                                                                                                                                                                                                                                                                                                                                                                                                                                                                                                                                                                                                                                                                                                                                                                                                                                                                                                                                                                                                                                                                                                                                                                                                                                                                                                                                                                                                                                                                                                                                                                                                                                                                                                                                                                                                                                                                                                                                                                                                                                                                                                                                                                                                                                                                                                                                                                                                                                                                                                                                                                                                                                                                                                                                                                                                                                                                             | -0.249282                                                                         | -1.971371                                                                          | -0.318639 |           |           |          |   |           |          |          |   |           |          |          |   |           |          |          |   |           |          |          |   |           |          |          |   |           |          |          |   |           |          |          |   |           |          |          |   |           |          |           |   |           |          |           |   |           |          |          |   |           |          |          |   |           |          |          |   |           |          |           |   |           |           |          |   |           |          |           |   |           |          |           |   |           |          |          |   |           |          |           |   |           |          |           |   |           |          |           |   |           |          |           |   |            |          |           |   |           |           |          |   |           |          |           |   |           |           |           |   |           |           |          |   |           |           |           |   |          |           |          |   |           |          |          |
| F                                                                                                                                                                                                                                                                                                                                                                                                                                                                                                                                                                                                                                                                                                                                                                                                                                                                                                                                                                                                                                                                                                                                                                                                                                                                                                                                                                                                                                                                                                                                                                                                                                                                                                                                                                                                                                                                                                                                                                                                                                                                                                                                                                                                                                                                                                                                                                                                                                                                                                                                                                                                                                                                                                                                                                                                                                                                                                                                                                                                                                                                                                                                                                                                                                                                                                                                                                                                                                                                                                                                                                                                                                                                                                                                                                                                                                                                                                                                                                                                                                                                                                                                                                                                                                                                                                                                                                                                                                                                                                                                                                                                                                                                                                                                                                                                                                                                                                                                                                                                                                                                                                                                                                                                                                                                                                                                                                                                                                                                                                                                                                                                                                                                                                                                                                                                                                                                                                                                                                                                                                             | 0.232971                                                                          | -0.401393                                                                          | 1.119607  |           |           |          |   |           |          |          |   |           |          |          |   |           |          |          |   |           |          |          |   |           |          |          |   |           |          |          |   |           |          |          |   |           |          |          |   |           |          |           |   |           |          |           |   |           |          |          |   |           |          |          |   |           |          |          |   |           |          |           |   |           |           |          |   |           |          |           |   |           |          |           |   |           |          |          |   |           |          |           |   |           |          |           |   |           |          |           |   |           |          |           |   |            |          |           |   |           |           |          |   |           |          |           |   |           |           |           |   |           |           |          |   |           |           |           |   |          |           |          |   |           |          |          |
| O                                                                                                                                                                                                                                                                                                                                                                                                                                                                                                                                                                                                                                                                                                                                                                                                                                                                                                                                                                                                                                                                                                                                                                                                                                                                                                                                                                                                                                                                                                                                                                                                                                                                                                                                                                                                                                                                                                                                                                                                                                                                                                                                                                                                                                                                                                                                                                                                                                                                                                                                                                                                                                                                                                                                                                                                                                                                                                                                                                                                                                                                                                                                                                                                                                                                                                                                                                                                                                                                                                                                                                                                                                                                                                                                                                                                                                                                                                                                                                                                                                                                                                                                                                                                                                                                                                                                                                                                                                                                                                                                                                                                                                                                                                                                                                                                                                                                                                                                                                                                                                                                                                                                                                                                                                                                                                                                                                                                                                                                                                                                                                                                                                                                                                                                                                                                                                                                                                                                                                                                                                             | -3.738815                                                                         | 2.432050                                                                           | 0.594010  |           |           |          |   |           |          |          |   |           |          |          |   |           |          |          |   |           |          |          |   |           |          |          |   |           |          |          |   |           |          |          |   |           |          |          |   |           |          |           |   |           |          |           |   |           |          |          |   |           |          |          |   |           |          |          |   |           |          |           |   |           |           |          |   |           |          |           |   |           |          |           |   |           |          |          |   |           |          |           |   |           |          |           |   |           |          |           |   |           |          |           |   |            |          |           |   |           |           |          |   |           |          |           |   |           |           |           |   |           |           |          |   |           |           |           |   |          |           |          |   |           |          |          |

|                                                                                                                                                                                                                                                                                                                                                                                                                                                                                                                                                                                                                                                                                                                                                                                                                                                                                                                                                                                                                                                                                                                                                                                                                                                                                                                                                                                                                                                                                                                                                                                                                                                                                                                                                                                                                                                                                                                                                                                                                                                                                                                                                                                                                                                                                                                                                                                                                                                                                                                                                                                                                                                                                                                                                                                                                                                                                                                                                                                                                                                                                                                                                                                                                                                                                                                                                                                                                                                                                                                                                                                                                                                                                                                                                                                                                                                                                                                                                                                                                                                                                                                                                                                                                                                                                                                                                                                                                                                                                                                                                                                                                                                                                                                                                                                                                                                                                                                                                                                                                                                                                                                                                                                                                                                                                                                                                                                                                                                                                                                                                                                                                                                                                                                                                                                                                                                                                                                                                                                                                                                                                                                                                                                                                                                                                                                                                                                                                                                                                                                                                                                                                                                                                                                                                                                                                                                                                                                                                                                                                                                                                                                                                                                       |                                                                                   |                                                                                    |           |          |           |          |   |          |           |          |   |          |           |          |   |          |           |          |   |          |           |          |   |           |           |           |   |           |           |          |   |           |           |           |   |           |           |           |   |           |           |          |   |          |          |          |   |           |          |          |   |           |           |          |   |          |           |           |   |          |           |           |   |          |           |           |   |          |           |           |   |          |          |           |   |          |          |           |   |          |          |           |   |          |          |           |   |          |          |           |   |          |          |           |   |          |          |           |   |          |          |           |   |          |          |           |   |          |          |           |   |          |          |           |   |          |          |           |   |          |          |           |   |          |          |           |   |          |          |           |   |          |          |           |   |          |          |           |   |          |          |           |   |          |          |           |   |          |          |           |
|---------------------------------------------------------------------------------------------------------------------------------------------------------------------------------------------------------------------------------------------------------------------------------------------------------------------------------------------------------------------------------------------------------------------------------------------------------------------------------------------------------------------------------------------------------------------------------------------------------------------------------------------------------------------------------------------------------------------------------------------------------------------------------------------------------------------------------------------------------------------------------------------------------------------------------------------------------------------------------------------------------------------------------------------------------------------------------------------------------------------------------------------------------------------------------------------------------------------------------------------------------------------------------------------------------------------------------------------------------------------------------------------------------------------------------------------------------------------------------------------------------------------------------------------------------------------------------------------------------------------------------------------------------------------------------------------------------------------------------------------------------------------------------------------------------------------------------------------------------------------------------------------------------------------------------------------------------------------------------------------------------------------------------------------------------------------------------------------------------------------------------------------------------------------------------------------------------------------------------------------------------------------------------------------------------------------------------------------------------------------------------------------------------------------------------------------------------------------------------------------------------------------------------------------------------------------------------------------------------------------------------------------------------------------------------------------------------------------------------------------------------------------------------------------------------------------------------------------------------------------------------------------------------------------------------------------------------------------------------------------------------------------------------------------------------------------------------------------------------------------------------------------------------------------------------------------------------------------------------------------------------------------------------------------------------------------------------------------------------------------------------------------------------------------------------------------------------------------------------------------------------------------------------------------------------------------------------------------------------------------------------------------------------------------------------------------------------------------------------------------------------------------------------------------------------------------------------------------------------------------------------------------------------------------------------------------------------------------------------------------------------------------------------------------------------------------------------------------------------------------------------------------------------------------------------------------------------------------------------------------------------------------------------------------------------------------------------------------------------------------------------------------------------------------------------------------------------------------------------------------------------------------------------------------------------------------------------------------------------------------------------------------------------------------------------------------------------------------------------------------------------------------------------------------------------------------------------------------------------------------------------------------------------------------------------------------------------------------------------------------------------------------------------------------------------------------------------------------------------------------------------------------------------------------------------------------------------------------------------------------------------------------------------------------------------------------------------------------------------------------------------------------------------------------------------------------------------------------------------------------------------------------------------------------------------------------------------------------------------------------------------------------------------------------------------------------------------------------------------------------------------------------------------------------------------------------------------------------------------------------------------------------------------------------------------------------------------------------------------------------------------------------------------------------------------------------------------------------------------------------------------------------------------------------------------------------------------------------------------------------------------------------------------------------------------------------------------------------------------------------------------------------------------------------------------------------------------------------------------------------------------------------------------------------------------------------------------------------------------------------------------------------------------------------------------------------------------------------------------------------------------------------------------------------------------------------------------------------------------------------------------------------------------------------------------------------------------------------------------------------------------------------------------------------------------------------------------------------------------------------------------------------------------------------------------------|-----------------------------------------------------------------------------------|------------------------------------------------------------------------------------|-----------|----------|-----------|----------|---|----------|-----------|----------|---|----------|-----------|----------|---|----------|-----------|----------|---|----------|-----------|----------|---|-----------|-----------|-----------|---|-----------|-----------|----------|---|-----------|-----------|-----------|---|-----------|-----------|-----------|---|-----------|-----------|----------|---|----------|----------|----------|---|-----------|----------|----------|---|-----------|-----------|----------|---|----------|-----------|-----------|---|----------|-----------|-----------|---|----------|-----------|-----------|---|----------|-----------|-----------|---|----------|----------|-----------|---|----------|----------|-----------|---|----------|----------|-----------|---|----------|----------|-----------|---|----------|----------|-----------|---|----------|----------|-----------|---|----------|----------|-----------|---|----------|----------|-----------|---|----------|----------|-----------|---|----------|----------|-----------|---|----------|----------|-----------|---|----------|----------|-----------|---|----------|----------|-----------|---|----------|----------|-----------|---|----------|----------|-----------|---|----------|----------|-----------|---|----------|----------|-----------|---|----------|----------|-----------|---|----------|----------|-----------|---|----------|----------|-----------|
| 6                                                                                                                                                                                                                                                                                                                                                                                                                                                                                                                                                                                                                                                                                                                                                                                                                                                                                                                                                                                                                                                                                                                                                                                                                                                                                                                                                                                                                                                                                                                                                                                                                                                                                                                                                                                                                                                                                                                                                                                                                                                                                                                                                                                                                                                                                                                                                                                                                                                                                                                                                                                                                                                                                                                                                                                                                                                                                                                                                                                                                                                                                                                                                                                                                                                                                                                                                                                                                                                                                                                                                                                                                                                                                                                                                                                                                                                                                                                                                                                                                                                                                                                                                                                                                                                                                                                                                                                                                                                                                                                                                                                                                                                                                                                                                                                                                                                                                                                                                                                                                                                                                                                                                                                                                                                                                                                                                                                                                                                                                                                                                                                                                                                                                                                                                                                                                                                                                                                                                                                                                                                                                                                                                                                                                                                                                                                                                                                                                                                                                                                                                                                                                                                                                                                                                                                                                                                                                                                                                                                                                                                                                                                                                                                     | 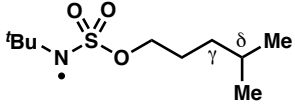 |  |           |          |           |          |   |          |           |          |   |          |           |          |   |          |           |          |   |          |           |          |   |           |           |           |   |           |           |          |   |           |           |           |   |           |           |           |   |           |           |          |   |          |          |          |   |           |          |          |   |           |           |          |   |          |           |           |   |          |           |           |   |          |           |           |   |          |           |           |   |          |          |           |   |          |          |           |   |          |          |           |   |          |          |           |   |          |          |           |   |          |          |           |   |          |          |           |   |          |          |           |   |          |          |           |   |          |          |           |   |          |          |           |   |          |          |           |   |          |          |           |   |          |          |           |   |          |          |           |   |          |          |           |   |          |          |           |   |          |          |           |   |          |          |           |   |          |          |           |
| <p style="text-align: center;">Atom                      Coordinates (Angstroms)</p> <p style="text-align: center;">                                  X                      Y                      Z</p> <p style="text-align: center;">-----</p>                                                                                                                                                                                                                                                                                                                                                                                                                                                                                                                                                                                                                                                                                                                                                                                                                                                                                                                                                                                                                                                                                                                                                                                                                                                                                                                                                                                                                                                                                                                                                                                                                                                                                                                                                                                                                                                                                                                                                                                                                                                                                                                                                                                                                                                                                                                                                                                                                                                                                                                                                                                                                                                                                                                                                                                                                                                                                                                                                                                                                                                                                                                                                                                                                                                                                                                                                                                                                                                                                                                                                                                                                                                                                                                                                                                                                                                                                                                                                                                                                                                                                                                                                                                                                                                                                                                                                                                                                                                                                                                                                                                                                                                                                                                                                                                                                                                                                                                                                                                                                                                                                                                                                                                                                                                                                                                                                                                                                                                                                                                                                                                                                                                                                                                                                                                                                                                                                                                                                                                                                                                                                                                                                                                                                                                                                                                                                                                                                                                                                                                                                                                                                                                                                                                                                                                                                                                                                                                                    |                                                                                   |                                                                                    |           |          |           |          |   |          |           |          |   |          |           |          |   |          |           |          |   |          |           |          |   |           |           |           |   |           |           |          |   |           |           |           |   |           |           |           |   |           |           |          |   |          |          |          |   |           |          |          |   |           |           |          |   |          |           |           |   |          |           |           |   |          |           |           |   |          |           |           |   |          |          |           |   |          |          |           |   |          |          |           |   |          |          |           |   |          |          |           |   |          |          |           |   |          |          |           |   |          |          |           |   |          |          |           |   |          |          |           |   |          |          |           |   |          |          |           |   |          |          |           |   |          |          |           |   |          |          |           |   |          |          |           |   |          |          |           |   |          |          |           |   |          |          |           |   |          |          |           |
| <table style="width: 100%; border-collapse: collapse;"> <tbody> <tr><td style="text-align: center;">C</td><td style="text-align: center;">0.270275</td><td style="text-align: center;">-1.048418</td><td style="text-align: center;">0.522496</td></tr> <tr><td style="text-align: center;">C</td><td style="text-align: center;">1.110647</td><td style="text-align: center;">-2.091926</td><td style="text-align: center;">1.285388</td></tr> <tr><td style="text-align: center;">H</td><td style="text-align: center;">1.581342</td><td style="text-align: center;">-2.810937</td><td style="text-align: center;">0.610885</td></tr> <tr><td style="text-align: center;">H</td><td style="text-align: center;">1.888595</td><td style="text-align: center;">-1.608080</td><td style="text-align: center;">1.881815</td></tr> <tr><td style="text-align: center;">H</td><td style="text-align: center;">0.452204</td><td style="text-align: center;">-2.644608</td><td style="text-align: center;">1.962242</td></tr> <tr><td style="text-align: center;">C</td><td style="text-align: center;">-0.785467</td><td style="text-align: center;">-1.756558</td><td style="text-align: center;">-0.376223</td></tr> <tr><td style="text-align: center;">H</td><td style="text-align: center;">-1.453866</td><td style="text-align: center;">-2.331387</td><td style="text-align: center;">0.272973</td></tr> <tr><td style="text-align: center;">H</td><td style="text-align: center;">-1.379950</td><td style="text-align: center;">-1.023871</td><td style="text-align: center;">-0.928577</td></tr> <tr><td style="text-align: center;">H</td><td style="text-align: center;">-0.304672</td><td style="text-align: center;">-2.433821</td><td style="text-align: center;">-1.084756</td></tr> <tr><td style="text-align: center;">C</td><td style="text-align: center;">-0.440887</td><td style="text-align: center;">-0.105030</td><td style="text-align: center;">1.512644</td></tr> <tr><td style="text-align: center;">H</td><td style="text-align: center;">0.287727</td><td style="text-align: center;">0.414457</td><td style="text-align: center;">2.142100</td></tr> <tr><td style="text-align: center;">H</td><td style="text-align: center;">-1.033400</td><td style="text-align: center;">0.642312</td><td style="text-align: center;">0.977647</td></tr> <tr><td style="text-align: center;">H</td><td style="text-align: center;">-1.107214</td><td style="text-align: center;">-0.683368</td><td style="text-align: center;">2.160302</td></tr> <tr><td style="text-align: center;">N</td><td style="text-align: center;">1.028708</td><td style="text-align: center;">-0.159470</td><td style="text-align: center;">-0.372499</td></tr> <tr><td style="text-align: center;">S</td><td style="text-align: center;">2.397879</td><td style="text-align: center;">-0.734690</td><td style="text-align: center;">-1.165311</td></tr> <tr><td style="text-align: center;">O</td><td style="text-align: center;">3.521303</td><td style="text-align: center;">-0.581652</td><td style="text-align: center;">-0.233936</td></tr> <tr><td style="text-align: center;">O</td><td style="text-align: center;">2.175572</td><td style="text-align: center;">-2.001225</td><td style="text-align: center;">-1.857733</td></tr> <tr><td style="text-align: center;">C</td><td style="text-align: center;">2.879159</td><td style="text-align: center;">1.736162</td><td style="text-align: center;">-1.984890</td></tr> <tr><td style="text-align: center;">H</td><td style="text-align: center;">2.106543</td><td style="text-align: center;">2.125583</td><td style="text-align: center;">-1.315296</td></tr> <tr><td style="text-align: center;">H</td><td style="text-align: center;">3.838833</td><td style="text-align: center;">1.711599</td><td style="text-align: center;">-1.461993</td></tr> <tr><td style="text-align: center;">C</td><td style="text-align: center;">2.957585</td><td style="text-align: center;">2.524496</td><td style="text-align: center;">-3.281640</td></tr> <tr><td style="text-align: center;">H</td><td style="text-align: center;">3.684695</td><td style="text-align: center;">2.039783</td><td style="text-align: center;">-3.941524</td></tr> <tr><td style="text-align: center;">H</td><td style="text-align: center;">1.983601</td><td style="text-align: center;">2.482630</td><td style="text-align: center;">-3.784729</td></tr> <tr><td style="text-align: center;">C</td><td style="text-align: center;">3.349343</td><td style="text-align: center;">3.987153</td><td style="text-align: center;">-3.018008</td></tr> <tr><td style="text-align: center;">H</td><td style="text-align: center;">4.347464</td><td style="text-align: center;">4.022908</td><td style="text-align: center;">-2.556976</td></tr> <tr><td style="text-align: center;">H</td><td style="text-align: center;">2.654434</td><td style="text-align: center;">4.414190</td><td style="text-align: center;">-2.281533</td></tr> <tr><td style="text-align: center;">C</td><td style="text-align: center;">3.345979</td><td style="text-align: center;">4.890115</td><td style="text-align: center;">-4.268746</td></tr> <tr><td style="text-align: center;">H</td><td style="text-align: center;">2.347673</td><td style="text-align: center;">4.818263</td><td style="text-align: center;">-4.726612</td></tr> <tr><td style="text-align: center;">C</td><td style="text-align: center;">4.380508</td><td style="text-align: center;">4.450544</td><td style="text-align: center;">-5.317104</td></tr> <tr><td style="text-align: center;">H</td><td style="text-align: center;">5.394375</td><td style="text-align: center;">4.475392</td><td style="text-align: center;">-4.896995</td></tr> <tr><td style="text-align: center;">H</td><td style="text-align: center;">4.194255</td><td style="text-align: center;">3.436291</td><td style="text-align: center;">-5.684115</td></tr> <tr><td style="text-align: center;">H</td><td style="text-align: center;">4.363940</td><td style="text-align: center;">5.121168</td><td style="text-align: center;">-6.183466</td></tr> <tr><td style="text-align: center;">C</td><td style="text-align: center;">3.573538</td><td style="text-align: center;">6.355931</td><td style="text-align: center;">-3.867008</td></tr> <tr><td style="text-align: center;">H</td><td style="text-align: center;">3.530566</td><td style="text-align: center;">7.016193</td><td style="text-align: center;">-4.740335</td></tr> <tr><td style="text-align: center;">H</td><td style="text-align: center;">2.817537</td><td style="text-align: center;">6.696783</td><td style="text-align: center;">-3.150369</td></tr> <tr><td style="text-align: center;">H</td><td style="text-align: center;">4.558754</td><td style="text-align: center;">6.484981</td><td style="text-align: center;">-3.400926</td></tr> <tr><td style="text-align: center;">O</td><td style="text-align: center;">2.517665</td><td style="text-align: center;">0.358690</td><td style="text-align: center;">-2.343767</td></tr> </tbody> </table> |                                                                                   |                                                                                    | C         | 0.270275 | -1.048418 | 0.522496 | C | 1.110647 | -2.091926 | 1.285388 | H | 1.581342 | -2.810937 | 0.610885 | H | 1.888595 | -1.608080 | 1.881815 | H | 0.452204 | -2.644608 | 1.962242 | C | -0.785467 | -1.756558 | -0.376223 | H | -1.453866 | -2.331387 | 0.272973 | H | -1.379950 | -1.023871 | -0.928577 | H | -0.304672 | -2.433821 | -1.084756 | C | -0.440887 | -0.105030 | 1.512644 | H | 0.287727 | 0.414457 | 2.142100 | H | -1.033400 | 0.642312 | 0.977647 | H | -1.107214 | -0.683368 | 2.160302 | N | 1.028708 | -0.159470 | -0.372499 | S | 2.397879 | -0.734690 | -1.165311 | O | 3.521303 | -0.581652 | -0.233936 | O | 2.175572 | -2.001225 | -1.857733 | C | 2.879159 | 1.736162 | -1.984890 | H | 2.106543 | 2.125583 | -1.315296 | H | 3.838833 | 1.711599 | -1.461993 | C | 2.957585 | 2.524496 | -3.281640 | H | 3.684695 | 2.039783 | -3.941524 | H | 1.983601 | 2.482630 | -3.784729 | C | 3.349343 | 3.987153 | -3.018008 | H | 4.347464 | 4.022908 | -2.556976 | H | 2.654434 | 4.414190 | -2.281533 | C | 3.345979 | 4.890115 | -4.268746 | H | 2.347673 | 4.818263 | -4.726612 | C | 4.380508 | 4.450544 | -5.317104 | H | 5.394375 | 4.475392 | -4.896995 | H | 4.194255 | 3.436291 | -5.684115 | H | 4.363940 | 5.121168 | -6.183466 | C | 3.573538 | 6.355931 | -3.867008 | H | 3.530566 | 7.016193 | -4.740335 | H | 2.817537 | 6.696783 | -3.150369 | H | 4.558754 | 6.484981 | -3.400926 | O | 2.517665 | 0.358690 | -2.343767 |
| C                                                                                                                                                                                                                                                                                                                                                                                                                                                                                                                                                                                                                                                                                                                                                                                                                                                                                                                                                                                                                                                                                                                                                                                                                                                                                                                                                                                                                                                                                                                                                                                                                                                                                                                                                                                                                                                                                                                                                                                                                                                                                                                                                                                                                                                                                                                                                                                                                                                                                                                                                                                                                                                                                                                                                                                                                                                                                                                                                                                                                                                                                                                                                                                                                                                                                                                                                                                                                                                                                                                                                                                                                                                                                                                                                                                                                                                                                                                                                                                                                                                                                                                                                                                                                                                                                                                                                                                                                                                                                                                                                                                                                                                                                                                                                                                                                                                                                                                                                                                                                                                                                                                                                                                                                                                                                                                                                                                                                                                                                                                                                                                                                                                                                                                                                                                                                                                                                                                                                                                                                                                                                                                                                                                                                                                                                                                                                                                                                                                                                                                                                                                                                                                                                                                                                                                                                                                                                                                                                                                                                                                                                                                                                                                     | 0.270275                                                                          | -1.048418                                                                          | 0.522496  |          |           |          |   |          |           |          |   |          |           |          |   |          |           |          |   |          |           |          |   |           |           |           |   |           |           |          |   |           |           |           |   |           |           |           |   |           |           |          |   |          |          |          |   |           |          |          |   |           |           |          |   |          |           |           |   |          |           |           |   |          |           |           |   |          |           |           |   |          |          |           |   |          |          |           |   |          |          |           |   |          |          |           |   |          |          |           |   |          |          |           |   |          |          |           |   |          |          |           |   |          |          |           |   |          |          |           |   |          |          |           |   |          |          |           |   |          |          |           |   |          |          |           |   |          |          |           |   |          |          |           |   |          |          |           |   |          |          |           |   |          |          |           |   |          |          |           |
| C                                                                                                                                                                                                                                                                                                                                                                                                                                                                                                                                                                                                                                                                                                                                                                                                                                                                                                                                                                                                                                                                                                                                                                                                                                                                                                                                                                                                                                                                                                                                                                                                                                                                                                                                                                                                                                                                                                                                                                                                                                                                                                                                                                                                                                                                                                                                                                                                                                                                                                                                                                                                                                                                                                                                                                                                                                                                                                                                                                                                                                                                                                                                                                                                                                                                                                                                                                                                                                                                                                                                                                                                                                                                                                                                                                                                                                                                                                                                                                                                                                                                                                                                                                                                                                                                                                                                                                                                                                                                                                                                                                                                                                                                                                                                                                                                                                                                                                                                                                                                                                                                                                                                                                                                                                                                                                                                                                                                                                                                                                                                                                                                                                                                                                                                                                                                                                                                                                                                                                                                                                                                                                                                                                                                                                                                                                                                                                                                                                                                                                                                                                                                                                                                                                                                                                                                                                                                                                                                                                                                                                                                                                                                                                                     | 1.110647                                                                          | -2.091926                                                                          | 1.285388  |          |           |          |   |          |           |          |   |          |           |          |   |          |           |          |   |          |           |          |   |           |           |           |   |           |           |          |   |           |           |           |   |           |           |           |   |           |           |          |   |          |          |          |   |           |          |          |   |           |           |          |   |          |           |           |   |          |           |           |   |          |           |           |   |          |           |           |   |          |          |           |   |          |          |           |   |          |          |           |   |          |          |           |   |          |          |           |   |          |          |           |   |          |          |           |   |          |          |           |   |          |          |           |   |          |          |           |   |          |          |           |   |          |          |           |   |          |          |           |   |          |          |           |   |          |          |           |   |          |          |           |   |          |          |           |   |          |          |           |   |          |          |           |   |          |          |           |
| H                                                                                                                                                                                                                                                                                                                                                                                                                                                                                                                                                                                                                                                                                                                                                                                                                                                                                                                                                                                                                                                                                                                                                                                                                                                                                                                                                                                                                                                                                                                                                                                                                                                                                                                                                                                                                                                                                                                                                                                                                                                                                                                                                                                                                                                                                                                                                                                                                                                                                                                                                                                                                                                                                                                                                                                                                                                                                                                                                                                                                                                                                                                                                                                                                                                                                                                                                                                                                                                                                                                                                                                                                                                                                                                                                                                                                                                                                                                                                                                                                                                                                                                                                                                                                                                                                                                                                                                                                                                                                                                                                                                                                                                                                                                                                                                                                                                                                                                                                                                                                                                                                                                                                                                                                                                                                                                                                                                                                                                                                                                                                                                                                                                                                                                                                                                                                                                                                                                                                                                                                                                                                                                                                                                                                                                                                                                                                                                                                                                                                                                                                                                                                                                                                                                                                                                                                                                                                                                                                                                                                                                                                                                                                                                     | 1.581342                                                                          | -2.810937                                                                          | 0.610885  |          |           |          |   |          |           |          |   |          |           |          |   |          |           |          |   |          |           |          |   |           |           |           |   |           |           |          |   |           |           |           |   |           |           |           |   |           |           |          |   |          |          |          |   |           |          |          |   |           |           |          |   |          |           |           |   |          |           |           |   |          |           |           |   |          |           |           |   |          |          |           |   |          |          |           |   |          |          |           |   |          |          |           |   |          |          |           |   |          |          |           |   |          |          |           |   |          |          |           |   |          |          |           |   |          |          |           |   |          |          |           |   |          |          |           |   |          |          |           |   |          |          |           |   |          |          |           |   |          |          |           |   |          |          |           |   |          |          |           |   |          |          |           |   |          |          |           |
| H                                                                                                                                                                                                                                                                                                                                                                                                                                                                                                                                                                                                                                                                                                                                                                                                                                                                                                                                                                                                                                                                                                                                                                                                                                                                                                                                                                                                                                                                                                                                                                                                                                                                                                                                                                                                                                                                                                                                                                                                                                                                                                                                                                                                                                                                                                                                                                                                                                                                                                                                                                                                                                                                                                                                                                                                                                                                                                                                                                                                                                                                                                                                                                                                                                                                                                                                                                                                                                                                                                                                                                                                                                                                                                                                                                                                                                                                                                                                                                                                                                                                                                                                                                                                                                                                                                                                                                                                                                                                                                                                                                                                                                                                                                                                                                                                                                                                                                                                                                                                                                                                                                                                                                                                                                                                                                                                                                                                                                                                                                                                                                                                                                                                                                                                                                                                                                                                                                                                                                                                                                                                                                                                                                                                                                                                                                                                                                                                                                                                                                                                                                                                                                                                                                                                                                                                                                                                                                                                                                                                                                                                                                                                                                                     | 1.888595                                                                          | -1.608080                                                                          | 1.881815  |          |           |          |   |          |           |          |   |          |           |          |   |          |           |          |   |          |           |          |   |           |           |           |   |           |           |          |   |           |           |           |   |           |           |           |   |           |           |          |   |          |          |          |   |           |          |          |   |           |           |          |   |          |           |           |   |          |           |           |   |          |           |           |   |          |           |           |   |          |          |           |   |          |          |           |   |          |          |           |   |          |          |           |   |          |          |           |   |          |          |           |   |          |          |           |   |          |          |           |   |          |          |           |   |          |          |           |   |          |          |           |   |          |          |           |   |          |          |           |   |          |          |           |   |          |          |           |   |          |          |           |   |          |          |           |   |          |          |           |   |          |          |           |   |          |          |           |
| H                                                                                                                                                                                                                                                                                                                                                                                                                                                                                                                                                                                                                                                                                                                                                                                                                                                                                                                                                                                                                                                                                                                                                                                                                                                                                                                                                                                                                                                                                                                                                                                                                                                                                                                                                                                                                                                                                                                                                                                                                                                                                                                                                                                                                                                                                                                                                                                                                                                                                                                                                                                                                                                                                                                                                                                                                                                                                                                                                                                                                                                                                                                                                                                                                                                                                                                                                                                                                                                                                                                                                                                                                                                                                                                                                                                                                                                                                                                                                                                                                                                                                                                                                                                                                                                                                                                                                                                                                                                                                                                                                                                                                                                                                                                                                                                                                                                                                                                                                                                                                                                                                                                                                                                                                                                                                                                                                                                                                                                                                                                                                                                                                                                                                                                                                                                                                                                                                                                                                                                                                                                                                                                                                                                                                                                                                                                                                                                                                                                                                                                                                                                                                                                                                                                                                                                                                                                                                                                                                                                                                                                                                                                                                                                     | 0.452204                                                                          | -2.644608                                                                          | 1.962242  |          |           |          |   |          |           |          |   |          |           |          |   |          |           |          |   |          |           |          |   |           |           |           |   |           |           |          |   |           |           |           |   |           |           |           |   |           |           |          |   |          |          |          |   |           |          |          |   |           |           |          |   |          |           |           |   |          |           |           |   |          |           |           |   |          |           |           |   |          |          |           |   |          |          |           |   |          |          |           |   |          |          |           |   |          |          |           |   |          |          |           |   |          |          |           |   |          |          |           |   |          |          |           |   |          |          |           |   |          |          |           |   |          |          |           |   |          |          |           |   |          |          |           |   |          |          |           |   |          |          |           |   |          |          |           |   |          |          |           |   |          |          |           |   |          |          |           |
| C                                                                                                                                                                                                                                                                                                                                                                                                                                                                                                                                                                                                                                                                                                                                                                                                                                                                                                                                                                                                                                                                                                                                                                                                                                                                                                                                                                                                                                                                                                                                                                                                                                                                                                                                                                                                                                                                                                                                                                                                                                                                                                                                                                                                                                                                                                                                                                                                                                                                                                                                                                                                                                                                                                                                                                                                                                                                                                                                                                                                                                                                                                                                                                                                                                                                                                                                                                                                                                                                                                                                                                                                                                                                                                                                                                                                                                                                                                                                                                                                                                                                                                                                                                                                                                                                                                                                                                                                                                                                                                                                                                                                                                                                                                                                                                                                                                                                                                                                                                                                                                                                                                                                                                                                                                                                                                                                                                                                                                                                                                                                                                                                                                                                                                                                                                                                                                                                                                                                                                                                                                                                                                                                                                                                                                                                                                                                                                                                                                                                                                                                                                                                                                                                                                                                                                                                                                                                                                                                                                                                                                                                                                                                                                                     | -0.785467                                                                         | -1.756558                                                                          | -0.376223 |          |           |          |   |          |           |          |   |          |           |          |   |          |           |          |   |          |           |          |   |           |           |           |   |           |           |          |   |           |           |           |   |           |           |           |   |           |           |          |   |          |          |          |   |           |          |          |   |           |           |          |   |          |           |           |   |          |           |           |   |          |           |           |   |          |           |           |   |          |          |           |   |          |          |           |   |          |          |           |   |          |          |           |   |          |          |           |   |          |          |           |   |          |          |           |   |          |          |           |   |          |          |           |   |          |          |           |   |          |          |           |   |          |          |           |   |          |          |           |   |          |          |           |   |          |          |           |   |          |          |           |   |          |          |           |   |          |          |           |   |          |          |           |   |          |          |           |
| H                                                                                                                                                                                                                                                                                                                                                                                                                                                                                                                                                                                                                                                                                                                                                                                                                                                                                                                                                                                                                                                                                                                                                                                                                                                                                                                                                                                                                                                                                                                                                                                                                                                                                                                                                                                                                                                                                                                                                                                                                                                                                                                                                                                                                                                                                                                                                                                                                                                                                                                                                                                                                                                                                                                                                                                                                                                                                                                                                                                                                                                                                                                                                                                                                                                                                                                                                                                                                                                                                                                                                                                                                                                                                                                                                                                                                                                                                                                                                                                                                                                                                                                                                                                                                                                                                                                                                                                                                                                                                                                                                                                                                                                                                                                                                                                                                                                                                                                                                                                                                                                                                                                                                                                                                                                                                                                                                                                                                                                                                                                                                                                                                                                                                                                                                                                                                                                                                                                                                                                                                                                                                                                                                                                                                                                                                                                                                                                                                                                                                                                                                                                                                                                                                                                                                                                                                                                                                                                                                                                                                                                                                                                                                                                     | -1.453866                                                                         | -2.331387                                                                          | 0.272973  |          |           |          |   |          |           |          |   |          |           |          |   |          |           |          |   |          |           |          |   |           |           |           |   |           |           |          |   |           |           |           |   |           |           |           |   |           |           |          |   |          |          |          |   |           |          |          |   |           |           |          |   |          |           |           |   |          |           |           |   |          |           |           |   |          |           |           |   |          |          |           |   |          |          |           |   |          |          |           |   |          |          |           |   |          |          |           |   |          |          |           |   |          |          |           |   |          |          |           |   |          |          |           |   |          |          |           |   |          |          |           |   |          |          |           |   |          |          |           |   |          |          |           |   |          |          |           |   |          |          |           |   |          |          |           |   |          |          |           |   |          |          |           |   |          |          |           |
| H                                                                                                                                                                                                                                                                                                                                                                                                                                                                                                                                                                                                                                                                                                                                                                                                                                                                                                                                                                                                                                                                                                                                                                                                                                                                                                                                                                                                                                                                                                                                                                                                                                                                                                                                                                                                                                                                                                                                                                                                                                                                                                                                                                                                                                                                                                                                                                                                                                                                                                                                                                                                                                                                                                                                                                                                                                                                                                                                                                                                                                                                                                                                                                                                                                                                                                                                                                                                                                                                                                                                                                                                                                                                                                                                                                                                                                                                                                                                                                                                                                                                                                                                                                                                                                                                                                                                                                                                                                                                                                                                                                                                                                                                                                                                                                                                                                                                                                                                                                                                                                                                                                                                                                                                                                                                                                                                                                                                                                                                                                                                                                                                                                                                                                                                                                                                                                                                                                                                                                                                                                                                                                                                                                                                                                                                                                                                                                                                                                                                                                                                                                                                                                                                                                                                                                                                                                                                                                                                                                                                                                                                                                                                                                                     | -1.379950                                                                         | -1.023871                                                                          | -0.928577 |          |           |          |   |          |           |          |   |          |           |          |   |          |           |          |   |          |           |          |   |           |           |           |   |           |           |          |   |           |           |           |   |           |           |           |   |           |           |          |   |          |          |          |   |           |          |          |   |           |           |          |   |          |           |           |   |          |           |           |   |          |           |           |   |          |           |           |   |          |          |           |   |          |          |           |   |          |          |           |   |          |          |           |   |          |          |           |   |          |          |           |   |          |          |           |   |          |          |           |   |          |          |           |   |          |          |           |   |          |          |           |   |          |          |           |   |          |          |           |   |          |          |           |   |          |          |           |   |          |          |           |   |          |          |           |   |          |          |           |   |          |          |           |   |          |          |           |
| H                                                                                                                                                                                                                                                                                                                                                                                                                                                                                                                                                                                                                                                                                                                                                                                                                                                                                                                                                                                                                                                                                                                                                                                                                                                                                                                                                                                                                                                                                                                                                                                                                                                                                                                                                                                                                                                                                                                                                                                                                                                                                                                                                                                                                                                                                                                                                                                                                                                                                                                                                                                                                                                                                                                                                                                                                                                                                                                                                                                                                                                                                                                                                                                                                                                                                                                                                                                                                                                                                                                                                                                                                                                                                                                                                                                                                                                                                                                                                                                                                                                                                                                                                                                                                                                                                                                                                                                                                                                                                                                                                                                                                                                                                                                                                                                                                                                                                                                                                                                                                                                                                                                                                                                                                                                                                                                                                                                                                                                                                                                                                                                                                                                                                                                                                                                                                                                                                                                                                                                                                                                                                                                                                                                                                                                                                                                                                                                                                                                                                                                                                                                                                                                                                                                                                                                                                                                                                                                                                                                                                                                                                                                                                                                     | -0.304672                                                                         | -2.433821                                                                          | -1.084756 |          |           |          |   |          |           |          |   |          |           |          |   |          |           |          |   |          |           |          |   |           |           |           |   |           |           |          |   |           |           |           |   |           |           |           |   |           |           |          |   |          |          |          |   |           |          |          |   |           |           |          |   |          |           |           |   |          |           |           |   |          |           |           |   |          |           |           |   |          |          |           |   |          |          |           |   |          |          |           |   |          |          |           |   |          |          |           |   |          |          |           |   |          |          |           |   |          |          |           |   |          |          |           |   |          |          |           |   |          |          |           |   |          |          |           |   |          |          |           |   |          |          |           |   |          |          |           |   |          |          |           |   |          |          |           |   |          |          |           |   |          |          |           |   |          |          |           |
| C                                                                                                                                                                                                                                                                                                                                                                                                                                                                                                                                                                                                                                                                                                                                                                                                                                                                                                                                                                                                                                                                                                                                                                                                                                                                                                                                                                                                                                                                                                                                                                                                                                                                                                                                                                                                                                                                                                                                                                                                                                                                                                                                                                                                                                                                                                                                                                                                                                                                                                                                                                                                                                                                                                                                                                                                                                                                                                                                                                                                                                                                                                                                                                                                                                                                                                                                                                                                                                                                                                                                                                                                                                                                                                                                                                                                                                                                                                                                                                                                                                                                                                                                                                                                                                                                                                                                                                                                                                                                                                                                                                                                                                                                                                                                                                                                                                                                                                                                                                                                                                                                                                                                                                                                                                                                                                                                                                                                                                                                                                                                                                                                                                                                                                                                                                                                                                                                                                                                                                                                                                                                                                                                                                                                                                                                                                                                                                                                                                                                                                                                                                                                                                                                                                                                                                                                                                                                                                                                                                                                                                                                                                                                                                                     | -0.440887                                                                         | -0.105030                                                                          | 1.512644  |          |           |          |   |          |           |          |   |          |           |          |   |          |           |          |   |          |           |          |   |           |           |           |   |           |           |          |   |           |           |           |   |           |           |           |   |           |           |          |   |          |          |          |   |           |          |          |   |           |           |          |   |          |           |           |   |          |           |           |   |          |           |           |   |          |           |           |   |          |          |           |   |          |          |           |   |          |          |           |   |          |          |           |   |          |          |           |   |          |          |           |   |          |          |           |   |          |          |           |   |          |          |           |   |          |          |           |   |          |          |           |   |          |          |           |   |          |          |           |   |          |          |           |   |          |          |           |   |          |          |           |   |          |          |           |   |          |          |           |   |          |          |           |   |          |          |           |
| H                                                                                                                                                                                                                                                                                                                                                                                                                                                                                                                                                                                                                                                                                                                                                                                                                                                                                                                                                                                                                                                                                                                                                                                                                                                                                                                                                                                                                                                                                                                                                                                                                                                                                                                                                                                                                                                                                                                                                                                                                                                                                                                                                                                                                                                                                                                                                                                                                                                                                                                                                                                                                                                                                                                                                                                                                                                                                                                                                                                                                                                                                                                                                                                                                                                                                                                                                                                                                                                                                                                                                                                                                                                                                                                                                                                                                                                                                                                                                                                                                                                                                                                                                                                                                                                                                                                                                                                                                                                                                                                                                                                                                                                                                                                                                                                                                                                                                                                                                                                                                                                                                                                                                                                                                                                                                                                                                                                                                                                                                                                                                                                                                                                                                                                                                                                                                                                                                                                                                                                                                                                                                                                                                                                                                                                                                                                                                                                                                                                                                                                                                                                                                                                                                                                                                                                                                                                                                                                                                                                                                                                                                                                                                                                     | 0.287727                                                                          | 0.414457                                                                           | 2.142100  |          |           |          |   |          |           |          |   |          |           |          |   |          |           |          |   |          |           |          |   |           |           |           |   |           |           |          |   |           |           |           |   |           |           |           |   |           |           |          |   |          |          |          |   |           |          |          |   |           |           |          |   |          |           |           |   |          |           |           |   |          |           |           |   |          |           |           |   |          |          |           |   |          |          |           |   |          |          |           |   |          |          |           |   |          |          |           |   |          |          |           |   |          |          |           |   |          |          |           |   |          |          |           |   |          |          |           |   |          |          |           |   |          |          |           |   |          |          |           |   |          |          |           |   |          |          |           |   |          |          |           |   |          |          |           |   |          |          |           |   |          |          |           |   |          |          |           |
| H                                                                                                                                                                                                                                                                                                                                                                                                                                                                                                                                                                                                                                                                                                                                                                                                                                                                                                                                                                                                                                                                                                                                                                                                                                                                                                                                                                                                                                                                                                                                                                                                                                                                                                                                                                                                                                                                                                                                                                                                                                                                                                                                                                                                                                                                                                                                                                                                                                                                                                                                                                                                                                                                                                                                                                                                                                                                                                                                                                                                                                                                                                                                                                                                                                                                                                                                                                                                                                                                                                                                                                                                                                                                                                                                                                                                                                                                                                                                                                                                                                                                                                                                                                                                                                                                                                                                                                                                                                                                                                                                                                                                                                                                                                                                                                                                                                                                                                                                                                                                                                                                                                                                                                                                                                                                                                                                                                                                                                                                                                                                                                                                                                                                                                                                                                                                                                                                                                                                                                                                                                                                                                                                                                                                                                                                                                                                                                                                                                                                                                                                                                                                                                                                                                                                                                                                                                                                                                                                                                                                                                                                                                                                                                                     | -1.033400                                                                         | 0.642312                                                                           | 0.977647  |          |           |          |   |          |           |          |   |          |           |          |   |          |           |          |   |          |           |          |   |           |           |           |   |           |           |          |   |           |           |           |   |           |           |           |   |           |           |          |   |          |          |          |   |           |          |          |   |           |           |          |   |          |           |           |   |          |           |           |   |          |           |           |   |          |           |           |   |          |          |           |   |          |          |           |   |          |          |           |   |          |          |           |   |          |          |           |   |          |          |           |   |          |          |           |   |          |          |           |   |          |          |           |   |          |          |           |   |          |          |           |   |          |          |           |   |          |          |           |   |          |          |           |   |          |          |           |   |          |          |           |   |          |          |           |   |          |          |           |   |          |          |           |   |          |          |           |
| H                                                                                                                                                                                                                                                                                                                                                                                                                                                                                                                                                                                                                                                                                                                                                                                                                                                                                                                                                                                                                                                                                                                                                                                                                                                                                                                                                                                                                                                                                                                                                                                                                                                                                                                                                                                                                                                                                                                                                                                                                                                                                                                                                                                                                                                                                                                                                                                                                                                                                                                                                                                                                                                                                                                                                                                                                                                                                                                                                                                                                                                                                                                                                                                                                                                                                                                                                                                                                                                                                                                                                                                                                                                                                                                                                                                                                                                                                                                                                                                                                                                                                                                                                                                                                                                                                                                                                                                                                                                                                                                                                                                                                                                                                                                                                                                                                                                                                                                                                                                                                                                                                                                                                                                                                                                                                                                                                                                                                                                                                                                                                                                                                                                                                                                                                                                                                                                                                                                                                                                                                                                                                                                                                                                                                                                                                                                                                                                                                                                                                                                                                                                                                                                                                                                                                                                                                                                                                                                                                                                                                                                                                                                                                                                     | -1.107214                                                                         | -0.683368                                                                          | 2.160302  |          |           |          |   |          |           |          |   |          |           |          |   |          |           |          |   |          |           |          |   |           |           |           |   |           |           |          |   |           |           |           |   |           |           |           |   |           |           |          |   |          |          |          |   |           |          |          |   |           |           |          |   |          |           |           |   |          |           |           |   |          |           |           |   |          |           |           |   |          |          |           |   |          |          |           |   |          |          |           |   |          |          |           |   |          |          |           |   |          |          |           |   |          |          |           |   |          |          |           |   |          |          |           |   |          |          |           |   |          |          |           |   |          |          |           |   |          |          |           |   |          |          |           |   |          |          |           |   |          |          |           |   |          |          |           |   |          |          |           |   |          |          |           |   |          |          |           |
| N                                                                                                                                                                                                                                                                                                                                                                                                                                                                                                                                                                                                                                                                                                                                                                                                                                                                                                                                                                                                                                                                                                                                                                                                                                                                                                                                                                                                                                                                                                                                                                                                                                                                                                                                                                                                                                                                                                                                                                                                                                                                                                                                                                                                                                                                                                                                                                                                                                                                                                                                                                                                                                                                                                                                                                                                                                                                                                                                                                                                                                                                                                                                                                                                                                                                                                                                                                                                                                                                                                                                                                                                                                                                                                                                                                                                                                                                                                                                                                                                                                                                                                                                                                                                                                                                                                                                                                                                                                                                                                                                                                                                                                                                                                                                                                                                                                                                                                                                                                                                                                                                                                                                                                                                                                                                                                                                                                                                                                                                                                                                                                                                                                                                                                                                                                                                                                                                                                                                                                                                                                                                                                                                                                                                                                                                                                                                                                                                                                                                                                                                                                                                                                                                                                                                                                                                                                                                                                                                                                                                                                                                                                                                                                                     | 1.028708                                                                          | -0.159470                                                                          | -0.372499 |          |           |          |   |          |           |          |   |          |           |          |   |          |           |          |   |          |           |          |   |           |           |           |   |           |           |          |   |           |           |           |   |           |           |           |   |           |           |          |   |          |          |          |   |           |          |          |   |           |           |          |   |          |           |           |   |          |           |           |   |          |           |           |   |          |           |           |   |          |          |           |   |          |          |           |   |          |          |           |   |          |          |           |   |          |          |           |   |          |          |           |   |          |          |           |   |          |          |           |   |          |          |           |   |          |          |           |   |          |          |           |   |          |          |           |   |          |          |           |   |          |          |           |   |          |          |           |   |          |          |           |   |          |          |           |   |          |          |           |   |          |          |           |   |          |          |           |
| S                                                                                                                                                                                                                                                                                                                                                                                                                                                                                                                                                                                                                                                                                                                                                                                                                                                                                                                                                                                                                                                                                                                                                                                                                                                                                                                                                                                                                                                                                                                                                                                                                                                                                                                                                                                                                                                                                                                                                                                                                                                                                                                                                                                                                                                                                                                                                                                                                                                                                                                                                                                                                                                                                                                                                                                                                                                                                                                                                                                                                                                                                                                                                                                                                                                                                                                                                                                                                                                                                                                                                                                                                                                                                                                                                                                                                                                                                                                                                                                                                                                                                                                                                                                                                                                                                                                                                                                                                                                                                                                                                                                                                                                                                                                                                                                                                                                                                                                                                                                                                                                                                                                                                                                                                                                                                                                                                                                                                                                                                                                                                                                                                                                                                                                                                                                                                                                                                                                                                                                                                                                                                                                                                                                                                                                                                                                                                                                                                                                                                                                                                                                                                                                                                                                                                                                                                                                                                                                                                                                                                                                                                                                                                                                     | 2.397879                                                                          | -0.734690                                                                          | -1.165311 |          |           |          |   |          |           |          |   |          |           |          |   |          |           |          |   |          |           |          |   |           |           |           |   |           |           |          |   |           |           |           |   |           |           |           |   |           |           |          |   |          |          |          |   |           |          |          |   |           |           |          |   |          |           |           |   |          |           |           |   |          |           |           |   |          |           |           |   |          |          |           |   |          |          |           |   |          |          |           |   |          |          |           |   |          |          |           |   |          |          |           |   |          |          |           |   |          |          |           |   |          |          |           |   |          |          |           |   |          |          |           |   |          |          |           |   |          |          |           |   |          |          |           |   |          |          |           |   |          |          |           |   |          |          |           |   |          |          |           |   |          |          |           |   |          |          |           |
| O                                                                                                                                                                                                                                                                                                                                                                                                                                                                                                                                                                                                                                                                                                                                                                                                                                                                                                                                                                                                                                                                                                                                                                                                                                                                                                                                                                                                                                                                                                                                                                                                                                                                                                                                                                                                                                                                                                                                                                                                                                                                                                                                                                                                                                                                                                                                                                                                                                                                                                                                                                                                                                                                                                                                                                                                                                                                                                                                                                                                                                                                                                                                                                                                                                                                                                                                                                                                                                                                                                                                                                                                                                                                                                                                                                                                                                                                                                                                                                                                                                                                                                                                                                                                                                                                                                                                                                                                                                                                                                                                                                                                                                                                                                                                                                                                                                                                                                                                                                                                                                                                                                                                                                                                                                                                                                                                                                                                                                                                                                                                                                                                                                                                                                                                                                                                                                                                                                                                                                                                                                                                                                                                                                                                                                                                                                                                                                                                                                                                                                                                                                                                                                                                                                                                                                                                                                                                                                                                                                                                                                                                                                                                                                                     | 3.521303                                                                          | -0.581652                                                                          | -0.233936 |          |           |          |   |          |           |          |   |          |           |          |   |          |           |          |   |          |           |          |   |           |           |           |   |           |           |          |   |           |           |           |   |           |           |           |   |           |           |          |   |          |          |          |   |           |          |          |   |           |           |          |   |          |           |           |   |          |           |           |   |          |           |           |   |          |           |           |   |          |          |           |   |          |          |           |   |          |          |           |   |          |          |           |   |          |          |           |   |          |          |           |   |          |          |           |   |          |          |           |   |          |          |           |   |          |          |           |   |          |          |           |   |          |          |           |   |          |          |           |   |          |          |           |   |          |          |           |   |          |          |           |   |          |          |           |   |          |          |           |   |          |          |           |   |          |          |           |
| O                                                                                                                                                                                                                                                                                                                                                                                                                                                                                                                                                                                                                                                                                                                                                                                                                                                                                                                                                                                                                                                                                                                                                                                                                                                                                                                                                                                                                                                                                                                                                                                                                                                                                                                                                                                                                                                                                                                                                                                                                                                                                                                                                                                                                                                                                                                                                                                                                                                                                                                                                                                                                                                                                                                                                                                                                                                                                                                                                                                                                                                                                                                                                                                                                                                                                                                                                                                                                                                                                                                                                                                                                                                                                                                                                                                                                                                                                                                                                                                                                                                                                                                                                                                                                                                                                                                                                                                                                                                                                                                                                                                                                                                                                                                                                                                                                                                                                                                                                                                                                                                                                                                                                                                                                                                                                                                                                                                                                                                                                                                                                                                                                                                                                                                                                                                                                                                                                                                                                                                                                                                                                                                                                                                                                                                                                                                                                                                                                                                                                                                                                                                                                                                                                                                                                                                                                                                                                                                                                                                                                                                                                                                                                                                     | 2.175572                                                                          | -2.001225                                                                          | -1.857733 |          |           |          |   |          |           |          |   |          |           |          |   |          |           |          |   |          |           |          |   |           |           |           |   |           |           |          |   |           |           |           |   |           |           |           |   |           |           |          |   |          |          |          |   |           |          |          |   |           |           |          |   |          |           |           |   |          |           |           |   |          |           |           |   |          |           |           |   |          |          |           |   |          |          |           |   |          |          |           |   |          |          |           |   |          |          |           |   |          |          |           |   |          |          |           |   |          |          |           |   |          |          |           |   |          |          |           |   |          |          |           |   |          |          |           |   |          |          |           |   |          |          |           |   |          |          |           |   |          |          |           |   |          |          |           |   |          |          |           |   |          |          |           |   |          |          |           |
| C                                                                                                                                                                                                                                                                                                                                                                                                                                                                                                                                                                                                                                                                                                                                                                                                                                                                                                                                                                                                                                                                                                                                                                                                                                                                                                                                                                                                                                                                                                                                                                                                                                                                                                                                                                                                                                                                                                                                                                                                                                                                                                                                                                                                                                                                                                                                                                                                                                                                                                                                                                                                                                                                                                                                                                                                                                                                                                                                                                                                                                                                                                                                                                                                                                                                                                                                                                                                                                                                                                                                                                                                                                                                                                                                                                                                                                                                                                                                                                                                                                                                                                                                                                                                                                                                                                                                                                                                                                                                                                                                                                                                                                                                                                                                                                                                                                                                                                                                                                                                                                                                                                                                                                                                                                                                                                                                                                                                                                                                                                                                                                                                                                                                                                                                                                                                                                                                                                                                                                                                                                                                                                                                                                                                                                                                                                                                                                                                                                                                                                                                                                                                                                                                                                                                                                                                                                                                                                                                                                                                                                                                                                                                                                                     | 2.879159                                                                          | 1.736162                                                                           | -1.984890 |          |           |          |   |          |           |          |   |          |           |          |   |          |           |          |   |          |           |          |   |           |           |           |   |           |           |          |   |           |           |           |   |           |           |           |   |           |           |          |   |          |          |          |   |           |          |          |   |           |           |          |   |          |           |           |   |          |           |           |   |          |           |           |   |          |           |           |   |          |          |           |   |          |          |           |   |          |          |           |   |          |          |           |   |          |          |           |   |          |          |           |   |          |          |           |   |          |          |           |   |          |          |           |   |          |          |           |   |          |          |           |   |          |          |           |   |          |          |           |   |          |          |           |   |          |          |           |   |          |          |           |   |          |          |           |   |          |          |           |   |          |          |           |   |          |          |           |
| H                                                                                                                                                                                                                                                                                                                                                                                                                                                                                                                                                                                                                                                                                                                                                                                                                                                                                                                                                                                                                                                                                                                                                                                                                                                                                                                                                                                                                                                                                                                                                                                                                                                                                                                                                                                                                                                                                                                                                                                                                                                                                                                                                                                                                                                                                                                                                                                                                                                                                                                                                                                                                                                                                                                                                                                                                                                                                                                                                                                                                                                                                                                                                                                                                                                                                                                                                                                                                                                                                                                                                                                                                                                                                                                                                                                                                                                                                                                                                                                                                                                                                                                                                                                                                                                                                                                                                                                                                                                                                                                                                                                                                                                                                                                                                                                                                                                                                                                                                                                                                                                                                                                                                                                                                                                                                                                                                                                                                                                                                                                                                                                                                                                                                                                                                                                                                                                                                                                                                                                                                                                                                                                                                                                                                                                                                                                                                                                                                                                                                                                                                                                                                                                                                                                                                                                                                                                                                                                                                                                                                                                                                                                                                                                     | 2.106543                                                                          | 2.125583                                                                           | -1.315296 |          |           |          |   |          |           |          |   |          |           |          |   |          |           |          |   |          |           |          |   |           |           |           |   |           |           |          |   |           |           |           |   |           |           |           |   |           |           |          |   |          |          |          |   |           |          |          |   |           |           |          |   |          |           |           |   |          |           |           |   |          |           |           |   |          |           |           |   |          |          |           |   |          |          |           |   |          |          |           |   |          |          |           |   |          |          |           |   |          |          |           |   |          |          |           |   |          |          |           |   |          |          |           |   |          |          |           |   |          |          |           |   |          |          |           |   |          |          |           |   |          |          |           |   |          |          |           |   |          |          |           |   |          |          |           |   |          |          |           |   |          |          |           |   |          |          |           |
| H                                                                                                                                                                                                                                                                                                                                                                                                                                                                                                                                                                                                                                                                                                                                                                                                                                                                                                                                                                                                                                                                                                                                                                                                                                                                                                                                                                                                                                                                                                                                                                                                                                                                                                                                                                                                                                                                                                                                                                                                                                                                                                                                                                                                                                                                                                                                                                                                                                                                                                                                                                                                                                                                                                                                                                                                                                                                                                                                                                                                                                                                                                                                                                                                                                                                                                                                                                                                                                                                                                                                                                                                                                                                                                                                                                                                                                                                                                                                                                                                                                                                                                                                                                                                                                                                                                                                                                                                                                                                                                                                                                                                                                                                                                                                                                                                                                                                                                                                                                                                                                                                                                                                                                                                                                                                                                                                                                                                                                                                                                                                                                                                                                                                                                                                                                                                                                                                                                                                                                                                                                                                                                                                                                                                                                                                                                                                                                                                                                                                                                                                                                                                                                                                                                                                                                                                                                                                                                                                                                                                                                                                                                                                                                                     | 3.838833                                                                          | 1.711599                                                                           | -1.461993 |          |           |          |   |          |           |          |   |          |           |          |   |          |           |          |   |          |           |          |   |           |           |           |   |           |           |          |   |           |           |           |   |           |           |           |   |           |           |          |   |          |          |          |   |           |          |          |   |           |           |          |   |          |           |           |   |          |           |           |   |          |           |           |   |          |           |           |   |          |          |           |   |          |          |           |   |          |          |           |   |          |          |           |   |          |          |           |   |          |          |           |   |          |          |           |   |          |          |           |   |          |          |           |   |          |          |           |   |          |          |           |   |          |          |           |   |          |          |           |   |          |          |           |   |          |          |           |   |          |          |           |   |          |          |           |   |          |          |           |   |          |          |           |   |          |          |           |
| C                                                                                                                                                                                                                                                                                                                                                                                                                                                                                                                                                                                                                                                                                                                                                                                                                                                                                                                                                                                                                                                                                                                                                                                                                                                                                                                                                                                                                                                                                                                                                                                                                                                                                                                                                                                                                                                                                                                                                                                                                                                                                                                                                                                                                                                                                                                                                                                                                                                                                                                                                                                                                                                                                                                                                                                                                                                                                                                                                                                                                                                                                                                                                                                                                                                                                                                                                                                                                                                                                                                                                                                                                                                                                                                                                                                                                                                                                                                                                                                                                                                                                                                                                                                                                                                                                                                                                                                                                                                                                                                                                                                                                                                                                                                                                                                                                                                                                                                                                                                                                                                                                                                                                                                                                                                                                                                                                                                                                                                                                                                                                                                                                                                                                                                                                                                                                                                                                                                                                                                                                                                                                                                                                                                                                                                                                                                                                                                                                                                                                                                                                                                                                                                                                                                                                                                                                                                                                                                                                                                                                                                                                                                                                                                     | 2.957585                                                                          | 2.524496                                                                           | -3.281640 |          |           |          |   |          |           |          |   |          |           |          |   |          |           |          |   |          |           |          |   |           |           |           |   |           |           |          |   |           |           |           |   |           |           |           |   |           |           |          |   |          |          |          |   |           |          |          |   |           |           |          |   |          |           |           |   |          |           |           |   |          |           |           |   |          |           |           |   |          |          |           |   |          |          |           |   |          |          |           |   |          |          |           |   |          |          |           |   |          |          |           |   |          |          |           |   |          |          |           |   |          |          |           |   |          |          |           |   |          |          |           |   |          |          |           |   |          |          |           |   |          |          |           |   |          |          |           |   |          |          |           |   |          |          |           |   |          |          |           |   |          |          |           |   |          |          |           |
| H                                                                                                                                                                                                                                                                                                                                                                                                                                                                                                                                                                                                                                                                                                                                                                                                                                                                                                                                                                                                                                                                                                                                                                                                                                                                                                                                                                                                                                                                                                                                                                                                                                                                                                                                                                                                                                                                                                                                                                                                                                                                                                                                                                                                                                                                                                                                                                                                                                                                                                                                                                                                                                                                                                                                                                                                                                                                                                                                                                                                                                                                                                                                                                                                                                                                                                                                                                                                                                                                                                                                                                                                                                                                                                                                                                                                                                                                                                                                                                                                                                                                                                                                                                                                                                                                                                                                                                                                                                                                                                                                                                                                                                                                                                                                                                                                                                                                                                                                                                                                                                                                                                                                                                                                                                                                                                                                                                                                                                                                                                                                                                                                                                                                                                                                                                                                                                                                                                                                                                                                                                                                                                                                                                                                                                                                                                                                                                                                                                                                                                                                                                                                                                                                                                                                                                                                                                                                                                                                                                                                                                                                                                                                                                                     | 3.684695                                                                          | 2.039783                                                                           | -3.941524 |          |           |          |   |          |           |          |   |          |           |          |   |          |           |          |   |          |           |          |   |           |           |           |   |           |           |          |   |           |           |           |   |           |           |           |   |           |           |          |   |          |          |          |   |           |          |          |   |           |           |          |   |          |           |           |   |          |           |           |   |          |           |           |   |          |           |           |   |          |          |           |   |          |          |           |   |          |          |           |   |          |          |           |   |          |          |           |   |          |          |           |   |          |          |           |   |          |          |           |   |          |          |           |   |          |          |           |   |          |          |           |   |          |          |           |   |          |          |           |   |          |          |           |   |          |          |           |   |          |          |           |   |          |          |           |   |          |          |           |   |          |          |           |   |          |          |           |
| H                                                                                                                                                                                                                                                                                                                                                                                                                                                                                                                                                                                                                                                                                                                                                                                                                                                                                                                                                                                                                                                                                                                                                                                                                                                                                                                                                                                                                                                                                                                                                                                                                                                                                                                                                                                                                                                                                                                                                                                                                                                                                                                                                                                                                                                                                                                                                                                                                                                                                                                                                                                                                                                                                                                                                                                                                                                                                                                                                                                                                                                                                                                                                                                                                                                                                                                                                                                                                                                                                                                                                                                                                                                                                                                                                                                                                                                                                                                                                                                                                                                                                                                                                                                                                                                                                                                                                                                                                                                                                                                                                                                                                                                                                                                                                                                                                                                                                                                                                                                                                                                                                                                                                                                                                                                                                                                                                                                                                                                                                                                                                                                                                                                                                                                                                                                                                                                                                                                                                                                                                                                                                                                                                                                                                                                                                                                                                                                                                                                                                                                                                                                                                                                                                                                                                                                                                                                                                                                                                                                                                                                                                                                                                                                     | 1.983601                                                                          | 2.482630                                                                           | -3.784729 |          |           |          |   |          |           |          |   |          |           |          |   |          |           |          |   |          |           |          |   |           |           |           |   |           |           |          |   |           |           |           |   |           |           |           |   |           |           |          |   |          |          |          |   |           |          |          |   |           |           |          |   |          |           |           |   |          |           |           |   |          |           |           |   |          |           |           |   |          |          |           |   |          |          |           |   |          |          |           |   |          |          |           |   |          |          |           |   |          |          |           |   |          |          |           |   |          |          |           |   |          |          |           |   |          |          |           |   |          |          |           |   |          |          |           |   |          |          |           |   |          |          |           |   |          |          |           |   |          |          |           |   |          |          |           |   |          |          |           |   |          |          |           |   |          |          |           |
| C                                                                                                                                                                                                                                                                                                                                                                                                                                                                                                                                                                                                                                                                                                                                                                                                                                                                                                                                                                                                                                                                                                                                                                                                                                                                                                                                                                                                                                                                                                                                                                                                                                                                                                                                                                                                                                                                                                                                                                                                                                                                                                                                                                                                                                                                                                                                                                                                                                                                                                                                                                                                                                                                                                                                                                                                                                                                                                                                                                                                                                                                                                                                                                                                                                                                                                                                                                                                                                                                                                                                                                                                                                                                                                                                                                                                                                                                                                                                                                                                                                                                                                                                                                                                                                                                                                                                                                                                                                                                                                                                                                                                                                                                                                                                                                                                                                                                                                                                                                                                                                                                                                                                                                                                                                                                                                                                                                                                                                                                                                                                                                                                                                                                                                                                                                                                                                                                                                                                                                                                                                                                                                                                                                                                                                                                                                                                                                                                                                                                                                                                                                                                                                                                                                                                                                                                                                                                                                                                                                                                                                                                                                                                                                                     | 3.349343                                                                          | 3.987153                                                                           | -3.018008 |          |           |          |   |          |           |          |   |          |           |          |   |          |           |          |   |          |           |          |   |           |           |           |   |           |           |          |   |           |           |           |   |           |           |           |   |           |           |          |   |          |          |          |   |           |          |          |   |           |           |          |   |          |           |           |   |          |           |           |   |          |           |           |   |          |           |           |   |          |          |           |   |          |          |           |   |          |          |           |   |          |          |           |   |          |          |           |   |          |          |           |   |          |          |           |   |          |          |           |   |          |          |           |   |          |          |           |   |          |          |           |   |          |          |           |   |          |          |           |   |          |          |           |   |          |          |           |   |          |          |           |   |          |          |           |   |          |          |           |   |          |          |           |   |          |          |           |
| H                                                                                                                                                                                                                                                                                                                                                                                                                                                                                                                                                                                                                                                                                                                                                                                                                                                                                                                                                                                                                                                                                                                                                                                                                                                                                                                                                                                                                                                                                                                                                                                                                                                                                                                                                                                                                                                                                                                                                                                                                                                                                                                                                                                                                                                                                                                                                                                                                                                                                                                                                                                                                                                                                                                                                                                                                                                                                                                                                                                                                                                                                                                                                                                                                                                                                                                                                                                                                                                                                                                                                                                                                                                                                                                                                                                                                                                                                                                                                                                                                                                                                                                                                                                                                                                                                                                                                                                                                                                                                                                                                                                                                                                                                                                                                                                                                                                                                                                                                                                                                                                                                                                                                                                                                                                                                                                                                                                                                                                                                                                                                                                                                                                                                                                                                                                                                                                                                                                                                                                                                                                                                                                                                                                                                                                                                                                                                                                                                                                                                                                                                                                                                                                                                                                                                                                                                                                                                                                                                                                                                                                                                                                                                                                     | 4.347464                                                                          | 4.022908                                                                           | -2.556976 |          |           |          |   |          |           |          |   |          |           |          |   |          |           |          |   |          |           |          |   |           |           |           |   |           |           |          |   |           |           |           |   |           |           |           |   |           |           |          |   |          |          |          |   |           |          |          |   |           |           |          |   |          |           |           |   |          |           |           |   |          |           |           |   |          |           |           |   |          |          |           |   |          |          |           |   |          |          |           |   |          |          |           |   |          |          |           |   |          |          |           |   |          |          |           |   |          |          |           |   |          |          |           |   |          |          |           |   |          |          |           |   |          |          |           |   |          |          |           |   |          |          |           |   |          |          |           |   |          |          |           |   |          |          |           |   |          |          |           |   |          |          |           |   |          |          |           |
| H                                                                                                                                                                                                                                                                                                                                                                                                                                                                                                                                                                                                                                                                                                                                                                                                                                                                                                                                                                                                                                                                                                                                                                                                                                                                                                                                                                                                                                                                                                                                                                                                                                                                                                                                                                                                                                                                                                                                                                                                                                                                                                                                                                                                                                                                                                                                                                                                                                                                                                                                                                                                                                                                                                                                                                                                                                                                                                                                                                                                                                                                                                                                                                                                                                                                                                                                                                                                                                                                                                                                                                                                                                                                                                                                                                                                                                                                                                                                                                                                                                                                                                                                                                                                                                                                                                                                                                                                                                                                                                                                                                                                                                                                                                                                                                                                                                                                                                                                                                                                                                                                                                                                                                                                                                                                                                                                                                                                                                                                                                                                                                                                                                                                                                                                                                                                                                                                                                                                                                                                                                                                                                                                                                                                                                                                                                                                                                                                                                                                                                                                                                                                                                                                                                                                                                                                                                                                                                                                                                                                                                                                                                                                                                                     | 2.654434                                                                          | 4.414190                                                                           | -2.281533 |          |           |          |   |          |           |          |   |          |           |          |   |          |           |          |   |          |           |          |   |           |           |           |   |           |           |          |   |           |           |           |   |           |           |           |   |           |           |          |   |          |          |          |   |           |          |          |   |           |           |          |   |          |           |           |   |          |           |           |   |          |           |           |   |          |           |           |   |          |          |           |   |          |          |           |   |          |          |           |   |          |          |           |   |          |          |           |   |          |          |           |   |          |          |           |   |          |          |           |   |          |          |           |   |          |          |           |   |          |          |           |   |          |          |           |   |          |          |           |   |          |          |           |   |          |          |           |   |          |          |           |   |          |          |           |   |          |          |           |   |          |          |           |   |          |          |           |
| C                                                                                                                                                                                                                                                                                                                                                                                                                                                                                                                                                                                                                                                                                                                                                                                                                                                                                                                                                                                                                                                                                                                                                                                                                                                                                                                                                                                                                                                                                                                                                                                                                                                                                                                                                                                                                                                                                                                                                                                                                                                                                                                                                                                                                                                                                                                                                                                                                                                                                                                                                                                                                                                                                                                                                                                                                                                                                                                                                                                                                                                                                                                                                                                                                                                                                                                                                                                                                                                                                                                                                                                                                                                                                                                                                                                                                                                                                                                                                                                                                                                                                                                                                                                                                                                                                                                                                                                                                                                                                                                                                                                                                                                                                                                                                                                                                                                                                                                                                                                                                                                                                                                                                                                                                                                                                                                                                                                                                                                                                                                                                                                                                                                                                                                                                                                                                                                                                                                                                                                                                                                                                                                                                                                                                                                                                                                                                                                                                                                                                                                                                                                                                                                                                                                                                                                                                                                                                                                                                                                                                                                                                                                                                                                     | 3.345979                                                                          | 4.890115                                                                           | -4.268746 |          |           |          |   |          |           |          |   |          |           |          |   |          |           |          |   |          |           |          |   |           |           |           |   |           |           |          |   |           |           |           |   |           |           |           |   |           |           |          |   |          |          |          |   |           |          |          |   |           |           |          |   |          |           |           |   |          |           |           |   |          |           |           |   |          |           |           |   |          |          |           |   |          |          |           |   |          |          |           |   |          |          |           |   |          |          |           |   |          |          |           |   |          |          |           |   |          |          |           |   |          |          |           |   |          |          |           |   |          |          |           |   |          |          |           |   |          |          |           |   |          |          |           |   |          |          |           |   |          |          |           |   |          |          |           |   |          |          |           |   |          |          |           |   |          |          |           |
| H                                                                                                                                                                                                                                                                                                                                                                                                                                                                                                                                                                                                                                                                                                                                                                                                                                                                                                                                                                                                                                                                                                                                                                                                                                                                                                                                                                                                                                                                                                                                                                                                                                                                                                                                                                                                                                                                                                                                                                                                                                                                                                                                                                                                                                                                                                                                                                                                                                                                                                                                                                                                                                                                                                                                                                                                                                                                                                                                                                                                                                                                                                                                                                                                                                                                                                                                                                                                                                                                                                                                                                                                                                                                                                                                                                                                                                                                                                                                                                                                                                                                                                                                                                                                                                                                                                                                                                                                                                                                                                                                                                                                                                                                                                                                                                                                                                                                                                                                                                                                                                                                                                                                                                                                                                                                                                                                                                                                                                                                                                                                                                                                                                                                                                                                                                                                                                                                                                                                                                                                                                                                                                                                                                                                                                                                                                                                                                                                                                                                                                                                                                                                                                                                                                                                                                                                                                                                                                                                                                                                                                                                                                                                                                                     | 2.347673                                                                          | 4.818263                                                                           | -4.726612 |          |           |          |   |          |           |          |   |          |           |          |   |          |           |          |   |          |           |          |   |           |           |           |   |           |           |          |   |           |           |           |   |           |           |           |   |           |           |          |   |          |          |          |   |           |          |          |   |           |           |          |   |          |           |           |   |          |           |           |   |          |           |           |   |          |           |           |   |          |          |           |   |          |          |           |   |          |          |           |   |          |          |           |   |          |          |           |   |          |          |           |   |          |          |           |   |          |          |           |   |          |          |           |   |          |          |           |   |          |          |           |   |          |          |           |   |          |          |           |   |          |          |           |   |          |          |           |   |          |          |           |   |          |          |           |   |          |          |           |   |          |          |           |   |          |          |           |
| C                                                                                                                                                                                                                                                                                                                                                                                                                                                                                                                                                                                                                                                                                                                                                                                                                                                                                                                                                                                                                                                                                                                                                                                                                                                                                                                                                                                                                                                                                                                                                                                                                                                                                                                                                                                                                                                                                                                                                                                                                                                                                                                                                                                                                                                                                                                                                                                                                                                                                                                                                                                                                                                                                                                                                                                                                                                                                                                                                                                                                                                                                                                                                                                                                                                                                                                                                                                                                                                                                                                                                                                                                                                                                                                                                                                                                                                                                                                                                                                                                                                                                                                                                                                                                                                                                                                                                                                                                                                                                                                                                                                                                                                                                                                                                                                                                                                                                                                                                                                                                                                                                                                                                                                                                                                                                                                                                                                                                                                                                                                                                                                                                                                                                                                                                                                                                                                                                                                                                                                                                                                                                                                                                                                                                                                                                                                                                                                                                                                                                                                                                                                                                                                                                                                                                                                                                                                                                                                                                                                                                                                                                                                                                                                     | 4.380508                                                                          | 4.450544                                                                           | -5.317104 |          |           |          |   |          |           |          |   |          |           |          |   |          |           |          |   |          |           |          |   |           |           |           |   |           |           |          |   |           |           |           |   |           |           |           |   |           |           |          |   |          |          |          |   |           |          |          |   |           |           |          |   |          |           |           |   |          |           |           |   |          |           |           |   |          |           |           |   |          |          |           |   |          |          |           |   |          |          |           |   |          |          |           |   |          |          |           |   |          |          |           |   |          |          |           |   |          |          |           |   |          |          |           |   |          |          |           |   |          |          |           |   |          |          |           |   |          |          |           |   |          |          |           |   |          |          |           |   |          |          |           |   |          |          |           |   |          |          |           |   |          |          |           |   |          |          |           |
| H                                                                                                                                                                                                                                                                                                                                                                                                                                                                                                                                                                                                                                                                                                                                                                                                                                                                                                                                                                                                                                                                                                                                                                                                                                                                                                                                                                                                                                                                                                                                                                                                                                                                                                                                                                                                                                                                                                                                                                                                                                                                                                                                                                                                                                                                                                                                                                                                                                                                                                                                                                                                                                                                                                                                                                                                                                                                                                                                                                                                                                                                                                                                                                                                                                                                                                                                                                                                                                                                                                                                                                                                                                                                                                                                                                                                                                                                                                                                                                                                                                                                                                                                                                                                                                                                                                                                                                                                                                                                                                                                                                                                                                                                                                                                                                                                                                                                                                                                                                                                                                                                                                                                                                                                                                                                                                                                                                                                                                                                                                                                                                                                                                                                                                                                                                                                                                                                                                                                                                                                                                                                                                                                                                                                                                                                                                                                                                                                                                                                                                                                                                                                                                                                                                                                                                                                                                                                                                                                                                                                                                                                                                                                                                                     | 5.394375                                                                          | 4.475392                                                                           | -4.896995 |          |           |          |   |          |           |          |   |          |           |          |   |          |           |          |   |          |           |          |   |           |           |           |   |           |           |          |   |           |           |           |   |           |           |           |   |           |           |          |   |          |          |          |   |           |          |          |   |           |           |          |   |          |           |           |   |          |           |           |   |          |           |           |   |          |           |           |   |          |          |           |   |          |          |           |   |          |          |           |   |          |          |           |   |          |          |           |   |          |          |           |   |          |          |           |   |          |          |           |   |          |          |           |   |          |          |           |   |          |          |           |   |          |          |           |   |          |          |           |   |          |          |           |   |          |          |           |   |          |          |           |   |          |          |           |   |          |          |           |   |          |          |           |   |          |          |           |
| H                                                                                                                                                                                                                                                                                                                                                                                                                                                                                                                                                                                                                                                                                                                                                                                                                                                                                                                                                                                                                                                                                                                                                                                                                                                                                                                                                                                                                                                                                                                                                                                                                                                                                                                                                                                                                                                                                                                                                                                                                                                                                                                                                                                                                                                                                                                                                                                                                                                                                                                                                                                                                                                                                                                                                                                                                                                                                                                                                                                                                                                                                                                                                                                                                                                                                                                                                                                                                                                                                                                                                                                                                                                                                                                                                                                                                                                                                                                                                                                                                                                                                                                                                                                                                                                                                                                                                                                                                                                                                                                                                                                                                                                                                                                                                                                                                                                                                                                                                                                                                                                                                                                                                                                                                                                                                                                                                                                                                                                                                                                                                                                                                                                                                                                                                                                                                                                                                                                                                                                                                                                                                                                                                                                                                                                                                                                                                                                                                                                                                                                                                                                                                                                                                                                                                                                                                                                                                                                                                                                                                                                                                                                                                                                     | 4.194255                                                                          | 3.436291                                                                           | -5.684115 |          |           |          |   |          |           |          |   |          |           |          |   |          |           |          |   |          |           |          |   |           |           |           |   |           |           |          |   |           |           |           |   |           |           |           |   |           |           |          |   |          |          |          |   |           |          |          |   |           |           |          |   |          |           |           |   |          |           |           |   |          |           |           |   |          |           |           |   |          |          |           |   |          |          |           |   |          |          |           |   |          |          |           |   |          |          |           |   |          |          |           |   |          |          |           |   |          |          |           |   |          |          |           |   |          |          |           |   |          |          |           |   |          |          |           |   |          |          |           |   |          |          |           |   |          |          |           |   |          |          |           |   |          |          |           |   |          |          |           |   |          |          |           |   |          |          |           |
| H                                                                                                                                                                                                                                                                                                                                                                                                                                                                                                                                                                                                                                                                                                                                                                                                                                                                                                                                                                                                                                                                                                                                                                                                                                                                                                                                                                                                                                                                                                                                                                                                                                                                                                                                                                                                                                                                                                                                                                                                                                                                                                                                                                                                                                                                                                                                                                                                                                                                                                                                                                                                                                                                                                                                                                                                                                                                                                                                                                                                                                                                                                                                                                                                                                                                                                                                                                                                                                                                                                                                                                                                                                                                                                                                                                                                                                                                                                                                                                                                                                                                                                                                                                                                                                                                                                                                                                                                                                                                                                                                                                                                                                                                                                                                                                                                                                                                                                                                                                                                                                                                                                                                                                                                                                                                                                                                                                                                                                                                                                                                                                                                                                                                                                                                                                                                                                                                                                                                                                                                                                                                                                                                                                                                                                                                                                                                                                                                                                                                                                                                                                                                                                                                                                                                                                                                                                                                                                                                                                                                                                                                                                                                                                                     | 4.363940                                                                          | 5.121168                                                                           | -6.183466 |          |           |          |   |          |           |          |   |          |           |          |   |          |           |          |   |          |           |          |   |           |           |           |   |           |           |          |   |           |           |           |   |           |           |           |   |           |           |          |   |          |          |          |   |           |          |          |   |           |           |          |   |          |           |           |   |          |           |           |   |          |           |           |   |          |           |           |   |          |          |           |   |          |          |           |   |          |          |           |   |          |          |           |   |          |          |           |   |          |          |           |   |          |          |           |   |          |          |           |   |          |          |           |   |          |          |           |   |          |          |           |   |          |          |           |   |          |          |           |   |          |          |           |   |          |          |           |   |          |          |           |   |          |          |           |   |          |          |           |   |          |          |           |   |          |          |           |
| C                                                                                                                                                                                                                                                                                                                                                                                                                                                                                                                                                                                                                                                                                                                                                                                                                                                                                                                                                                                                                                                                                                                                                                                                                                                                                                                                                                                                                                                                                                                                                                                                                                                                                                                                                                                                                                                                                                                                                                                                                                                                                                                                                                                                                                                                                                                                                                                                                                                                                                                                                                                                                                                                                                                                                                                                                                                                                                                                                                                                                                                                                                                                                                                                                                                                                                                                                                                                                                                                                                                                                                                                                                                                                                                                                                                                                                                                                                                                                                                                                                                                                                                                                                                                                                                                                                                                                                                                                                                                                                                                                                                                                                                                                                                                                                                                                                                                                                                                                                                                                                                                                                                                                                                                                                                                                                                                                                                                                                                                                                                                                                                                                                                                                                                                                                                                                                                                                                                                                                                                                                                                                                                                                                                                                                                                                                                                                                                                                                                                                                                                                                                                                                                                                                                                                                                                                                                                                                                                                                                                                                                                                                                                                                                     | 3.573538                                                                          | 6.355931                                                                           | -3.867008 |          |           |          |   |          |           |          |   |          |           |          |   |          |           |          |   |          |           |          |   |           |           |           |   |           |           |          |   |           |           |           |   |           |           |           |   |           |           |          |   |          |          |          |   |           |          |          |   |           |           |          |   |          |           |           |   |          |           |           |   |          |           |           |   |          |           |           |   |          |          |           |   |          |          |           |   |          |          |           |   |          |          |           |   |          |          |           |   |          |          |           |   |          |          |           |   |          |          |           |   |          |          |           |   |          |          |           |   |          |          |           |   |          |          |           |   |          |          |           |   |          |          |           |   |          |          |           |   |          |          |           |   |          |          |           |   |          |          |           |   |          |          |           |   |          |          |           |
| H                                                                                                                                                                                                                                                                                                                                                                                                                                                                                                                                                                                                                                                                                                                                                                                                                                                                                                                                                                                                                                                                                                                                                                                                                                                                                                                                                                                                                                                                                                                                                                                                                                                                                                                                                                                                                                                                                                                                                                                                                                                                                                                                                                                                                                                                                                                                                                                                                                                                                                                                                                                                                                                                                                                                                                                                                                                                                                                                                                                                                                                                                                                                                                                                                                                                                                                                                                                                                                                                                                                                                                                                                                                                                                                                                                                                                                                                                                                                                                                                                                                                                                                                                                                                                                                                                                                                                                                                                                                                                                                                                                                                                                                                                                                                                                                                                                                                                                                                                                                                                                                                                                                                                                                                                                                                                                                                                                                                                                                                                                                                                                                                                                                                                                                                                                                                                                                                                                                                                                                                                                                                                                                                                                                                                                                                                                                                                                                                                                                                                                                                                                                                                                                                                                                                                                                                                                                                                                                                                                                                                                                                                                                                                                                     | 3.530566                                                                          | 7.016193                                                                           | -4.740335 |          |           |          |   |          |           |          |   |          |           |          |   |          |           |          |   |          |           |          |   |           |           |           |   |           |           |          |   |           |           |           |   |           |           |           |   |           |           |          |   |          |          |          |   |           |          |          |   |           |           |          |   |          |           |           |   |          |           |           |   |          |           |           |   |          |           |           |   |          |          |           |   |          |          |           |   |          |          |           |   |          |          |           |   |          |          |           |   |          |          |           |   |          |          |           |   |          |          |           |   |          |          |           |   |          |          |           |   |          |          |           |   |          |          |           |   |          |          |           |   |          |          |           |   |          |          |           |   |          |          |           |   |          |          |           |   |          |          |           |   |          |          |           |   |          |          |           |
| H                                                                                                                                                                                                                                                                                                                                                                                                                                                                                                                                                                                                                                                                                                                                                                                                                                                                                                                                                                                                                                                                                                                                                                                                                                                                                                                                                                                                                                                                                                                                                                                                                                                                                                                                                                                                                                                                                                                                                                                                                                                                                                                                                                                                                                                                                                                                                                                                                                                                                                                                                                                                                                                                                                                                                                                                                                                                                                                                                                                                                                                                                                                                                                                                                                                                                                                                                                                                                                                                                                                                                                                                                                                                                                                                                                                                                                                                                                                                                                                                                                                                                                                                                                                                                                                                                                                                                                                                                                                                                                                                                                                                                                                                                                                                                                                                                                                                                                                                                                                                                                                                                                                                                                                                                                                                                                                                                                                                                                                                                                                                                                                                                                                                                                                                                                                                                                                                                                                                                                                                                                                                                                                                                                                                                                                                                                                                                                                                                                                                                                                                                                                                                                                                                                                                                                                                                                                                                                                                                                                                                                                                                                                                                                                     | 2.817537                                                                          | 6.696783                                                                           | -3.150369 |          |           |          |   |          |           |          |   |          |           |          |   |          |           |          |   |          |           |          |   |           |           |           |   |           |           |          |   |           |           |           |   |           |           |           |   |           |           |          |   |          |          |          |   |           |          |          |   |           |           |          |   |          |           |           |   |          |           |           |   |          |           |           |   |          |           |           |   |          |          |           |   |          |          |           |   |          |          |           |   |          |          |           |   |          |          |           |   |          |          |           |   |          |          |           |   |          |          |           |   |          |          |           |   |          |          |           |   |          |          |           |   |          |          |           |   |          |          |           |   |          |          |           |   |          |          |           |   |          |          |           |   |          |          |           |   |          |          |           |   |          |          |           |   |          |          |           |
| H                                                                                                                                                                                                                                                                                                                                                                                                                                                                                                                                                                                                                                                                                                                                                                                                                                                                                                                                                                                                                                                                                                                                                                                                                                                                                                                                                                                                                                                                                                                                                                                                                                                                                                                                                                                                                                                                                                                                                                                                                                                                                                                                                                                                                                                                                                                                                                                                                                                                                                                                                                                                                                                                                                                                                                                                                                                                                                                                                                                                                                                                                                                                                                                                                                                                                                                                                                                                                                                                                                                                                                                                                                                                                                                                                                                                                                                                                                                                                                                                                                                                                                                                                                                                                                                                                                                                                                                                                                                                                                                                                                                                                                                                                                                                                                                                                                                                                                                                                                                                                                                                                                                                                                                                                                                                                                                                                                                                                                                                                                                                                                                                                                                                                                                                                                                                                                                                                                                                                                                                                                                                                                                                                                                                                                                                                                                                                                                                                                                                                                                                                                                                                                                                                                                                                                                                                                                                                                                                                                                                                                                                                                                                                                                     | 4.558754                                                                          | 6.484981                                                                           | -3.400926 |          |           |          |   |          |           |          |   |          |           |          |   |          |           |          |   |          |           |          |   |           |           |           |   |           |           |          |   |           |           |           |   |           |           |           |   |           |           |          |   |          |          |          |   |           |          |          |   |           |           |          |   |          |           |           |   |          |           |           |   |          |           |           |   |          |           |           |   |          |          |           |   |          |          |           |   |          |          |           |   |          |          |           |   |          |          |           |   |          |          |           |   |          |          |           |   |          |          |           |   |          |          |           |   |          |          |           |   |          |          |           |   |          |          |           |   |          |          |           |   |          |          |           |   |          |          |           |   |          |          |           |   |          |          |           |   |          |          |           |   |          |          |           |   |          |          |           |
| O                                                                                                                                                                                                                                                                                                                                                                                                                                                                                                                                                                                                                                                                                                                                                                                                                                                                                                                                                                                                                                                                                                                                                                                                                                                                                                                                                                                                                                                                                                                                                                                                                                                                                                                                                                                                                                                                                                                                                                                                                                                                                                                                                                                                                                                                                                                                                                                                                                                                                                                                                                                                                                                                                                                                                                                                                                                                                                                                                                                                                                                                                                                                                                                                                                                                                                                                                                                                                                                                                                                                                                                                                                                                                                                                                                                                                                                                                                                                                                                                                                                                                                                                                                                                                                                                                                                                                                                                                                                                                                                                                                                                                                                                                                                                                                                                                                                                                                                                                                                                                                                                                                                                                                                                                                                                                                                                                                                                                                                                                                                                                                                                                                                                                                                                                                                                                                                                                                                                                                                                                                                                                                                                                                                                                                                                                                                                                                                                                                                                                                                                                                                                                                                                                                                                                                                                                                                                                                                                                                                                                                                                                                                                                                                     | 2.517665                                                                          | 0.358690                                                                           | -2.343767 |          |           |          |   |          |           |          |   |          |           |          |   |          |           |          |   |          |           |          |   |           |           |           |   |           |           |          |   |           |           |           |   |           |           |           |   |           |           |          |   |          |          |          |   |           |          |          |   |           |           |          |   |          |           |           |   |          |           |           |   |          |           |           |   |          |           |           |   |          |          |           |   |          |          |           |   |          |          |           |   |          |          |           |   |          |          |           |   |          |          |           |   |          |          |           |   |          |          |           |   |          |          |           |   |          |          |           |   |          |          |           |   |          |          |           |   |          |          |           |   |          |          |           |   |          |          |           |   |          |          |           |   |          |          |           |   |          |          |           |   |          |          |           |   |          |          |           |

| 7                                                                                                                                                                                                                                                                                                                                                                                                                                                                                                                                                                                                                                                                                                                                                                                                                                                                                                                                                                                                                                                                                                                                                                                                                                                                                                                                                                                                                                                                                                                                                                                                                                                                                                                                                                                                                                                                                                                                                                                                                                                                                                                                                                                                                                                                                                                                                                                                                                                                                                                                                                                                                                                                                                  |                         |           |           |                         |  |  |   |           |          |           |   |           |          |           |   |           |          |           |   |           |          |           |   |           |          |           |   |           |           |          |   |           |           |          |   |           |           |          |   |           |           |          |   |           |          |          |   |           |          |          |   |           |          |          |   |           |          |          |   |           |          |          |   |           |           |           |   |           |           |           |   |           |           |           |   |           |          |           |   |           |          |           |   |           |          |           |   |           |          |           |   |           |          |           |   |           |          |           |   |           |          |           |   |           |          |           |   |           |          |           |   |           |          |           |   |           |          |          |   |           |          |          |   |           |          |          |   |           |          |          |   |           |          |          |   |           |          |          |   |           |          |          |
|----------------------------------------------------------------------------------------------------------------------------------------------------------------------------------------------------------------------------------------------------------------------------------------------------------------------------------------------------------------------------------------------------------------------------------------------------------------------------------------------------------------------------------------------------------------------------------------------------------------------------------------------------------------------------------------------------------------------------------------------------------------------------------------------------------------------------------------------------------------------------------------------------------------------------------------------------------------------------------------------------------------------------------------------------------------------------------------------------------------------------------------------------------------------------------------------------------------------------------------------------------------------------------------------------------------------------------------------------------------------------------------------------------------------------------------------------------------------------------------------------------------------------------------------------------------------------------------------------------------------------------------------------------------------------------------------------------------------------------------------------------------------------------------------------------------------------------------------------------------------------------------------------------------------------------------------------------------------------------------------------------------------------------------------------------------------------------------------------------------------------------------------------------------------------------------------------------------------------------------------------------------------------------------------------------------------------------------------------------------------------------------------------------------------------------------------------------------------------------------------------------------------------------------------------------------------------------------------------------------------------------------------------------------------------------------------------|-------------------------|-----------|-----------|-------------------------|--|--|---|-----------|----------|-----------|---|-----------|----------|-----------|---|-----------|----------|-----------|---|-----------|----------|-----------|---|-----------|----------|-----------|---|-----------|-----------|----------|---|-----------|-----------|----------|---|-----------|-----------|----------|---|-----------|-----------|----------|---|-----------|----------|----------|---|-----------|----------|----------|---|-----------|----------|----------|---|-----------|----------|----------|---|-----------|----------|----------|---|-----------|-----------|-----------|---|-----------|-----------|-----------|---|-----------|-----------|-----------|---|-----------|----------|-----------|---|-----------|----------|-----------|---|-----------|----------|-----------|---|-----------|----------|-----------|---|-----------|----------|-----------|---|-----------|----------|-----------|---|-----------|----------|-----------|---|-----------|----------|-----------|---|-----------|----------|-----------|---|-----------|----------|-----------|---|-----------|----------|----------|---|-----------|----------|----------|---|-----------|----------|----------|---|-----------|----------|----------|---|-----------|----------|----------|---|-----------|----------|----------|---|-----------|----------|----------|
| <table border="0" style="width: 100%; text-align: center;"> <thead> <tr> <th style="text-align: left;">Atom</th> <th colspan="3">Coordinates (Angstroms)</th> </tr> <tr> <th></th> <th>X</th> <th>Y</th> <th>Z</th> </tr> </thead> </table>                                                                                                                                                                                                                                                                                                                                                                                                                                                                                                                                                                                                                                                                                                                                                                                                                                                                                                                                                                                                                                                                                                                                                                                                                                                                                                                                                                                                                                                                                                                                                                                                                                                                                                                                                                                                                                                                                                                                                                                                                                                                                                                                                                                                                                                                                                                                                                                                                                                        |                         |           | Atom      | Coordinates (Angstroms) |  |  |   | X         | Y        | Z         |   |           |          |           |   |           |          |           |   |           |          |           |   |           |          |           |   |           |           |          |   |           |           |          |   |           |           |          |   |           |           |          |   |           |          |          |   |           |          |          |   |           |          |          |   |           |          |          |   |           |          |          |   |           |           |           |   |           |           |           |   |           |           |           |   |           |          |           |   |           |          |           |   |           |          |           |   |           |          |           |   |           |          |           |   |           |          |           |   |           |          |           |   |           |          |           |   |           |          |           |   |           |          |           |   |           |          |          |   |           |          |          |   |           |          |          |   |           |          |          |   |           |          |          |   |           |          |          |   |           |          |          |
| Atom                                                                                                                                                                                                                                                                                                                                                                                                                                                                                                                                                                                                                                                                                                                                                                                                                                                                                                                                                                                                                                                                                                                                                                                                                                                                                                                                                                                                                                                                                                                                                                                                                                                                                                                                                                                                                                                                                                                                                                                                                                                                                                                                                                                                                                                                                                                                                                                                                                                                                                                                                                                                                                                                                               | Coordinates (Angstroms) |           |           |                         |  |  |   |           |          |           |   |           |          |           |   |           |          |           |   |           |          |           |   |           |          |           |   |           |           |          |   |           |           |          |   |           |           |          |   |           |           |          |   |           |          |          |   |           |          |          |   |           |          |          |   |           |          |          |   |           |          |          |   |           |           |           |   |           |           |           |   |           |           |           |   |           |          |           |   |           |          |           |   |           |          |           |   |           |          |           |   |           |          |           |   |           |          |           |   |           |          |           |   |           |          |           |   |           |          |           |   |           |          |           |   |           |          |          |   |           |          |          |   |           |          |          |   |           |          |          |   |           |          |          |   |           |          |          |   |           |          |          |
|                                                                                                                                                                                                                                                                                                                                                                                                                                                                                                                                                                                                                                                                                                                                                                                                                                                                                                                                                                                                                                                                                                                                                                                                                                                                                                                                                                                                                                                                                                                                                                                                                                                                                                                                                                                                                                                                                                                                                                                                                                                                                                                                                                                                                                                                                                                                                                                                                                                                                                                                                                                                                                                                                                    | X                       | Y         | Z         |                         |  |  |   |           |          |           |   |           |          |           |   |           |          |           |   |           |          |           |   |           |          |           |   |           |           |          |   |           |           |          |   |           |           |          |   |           |           |          |   |           |          |          |   |           |          |          |   |           |          |          |   |           |          |          |   |           |          |          |   |           |           |           |   |           |           |           |   |           |           |           |   |           |          |           |   |           |          |           |   |           |          |           |   |           |          |           |   |           |          |           |   |           |          |           |   |           |          |           |   |           |          |           |   |           |          |           |   |           |          |           |   |           |          |          |   |           |          |          |   |           |          |          |   |           |          |          |   |           |          |          |   |           |          |          |   |           |          |          |
| <table border="0" style="width: 100%; text-align: center;"> <tbody> <tr><td colspan="4">-----</td></tr> <tr><td>C</td><td>-1.728181</td><td>1.003267</td><td>-0.057322</td></tr> <tr><td>C</td><td>-1.210227</td><td>1.166801</td><td>-1.497057</td></tr> <tr><td>H</td><td>-1.470273</td><td>0.308433</td><td>-2.120442</td></tr> <tr><td>H</td><td>-1.613235</td><td>2.069844</td><td>-1.964833</td></tr> <tr><td>H</td><td>-0.118931</td><td>1.254945</td><td>-1.479270</td></tr> <tr><td>C</td><td>-1.138728</td><td>-0.272256</td><td>0.589406</td></tr> <tr><td>H</td><td>-0.048522</td><td>-0.175398</td><td>0.631578</td></tr> <tr><td>H</td><td>-1.517527</td><td>-0.393176</td><td>1.608378</td></tr> <tr><td>H</td><td>-1.390278</td><td>-1.163471</td><td>0.013424</td></tr> <tr><td>C</td><td>-1.311980</td><td>2.218040</td><td>0.794045</td></tr> <tr><td>H</td><td>-1.649437</td><td>3.158631</td><td>0.349376</td></tr> <tr><td>H</td><td>-1.720575</td><td>2.142498</td><td>1.805844</td></tr> <tr><td>H</td><td>-0.220771</td><td>2.254117</td><td>0.863346</td></tr> <tr><td>N</td><td>-3.221613</td><td>0.921949</td><td>0.076999</td></tr> <tr><td>S</td><td>-4.143051</td><td>-0.060190</td><td>-0.911664</td></tr> <tr><td>O</td><td>-3.436215</td><td>-1.298489</td><td>-1.225751</td></tr> <tr><td>O</td><td>-5.485468</td><td>-0.094781</td><td>-0.330249</td></tr> <tr><td>C</td><td>-5.212238</td><td>1.806619</td><td>-2.494300</td></tr> <tr><td>H</td><td>-6.154382</td><td>1.515755</td><td>-2.023597</td></tr> <tr><td>H</td><td>-5.364862</td><td>1.881712</td><td>-3.572687</td></tr> <tr><td>O</td><td>-4.262615</td><td>0.709245</td><td>-2.367066</td></tr> <tr><td>C</td><td>-4.658282</td><td>3.122859</td><td>-1.943044</td></tr> <tr><td>H</td><td>-5.348552</td><td>3.916081</td><td>-2.266835</td></tr> <tr><td>H</td><td>-3.703460</td><td>3.330705</td><td>-2.438052</td></tr> <tr><td>C</td><td>-4.483729</td><td>3.196193</td><td>-0.432278</td></tr> <tr><td>H</td><td>-3.815951</td><td>2.123770</td><td>-0.092848</td></tr> <tr><td>H</td><td>-3.769912</td><td>3.976936</td><td>-0.144817</td></tr> <tr><td>C</td><td>-5.718680</td><td>3.202307</td><td>0.466905</td></tr> <tr><td>H</td><td>-6.349594</td><td>2.344922</td><td>0.203915</td></tr> <tr><td>C</td><td>-5.326477</td><td>3.063302</td><td>1.947025</td></tr> <tr><td>H</td><td>-4.690115</td><td>3.899818</td><td>2.263070</td></tr> <tr><td>H</td><td>-6.218139</td><td>3.064136</td><td>2.582499</td></tr> <tr><td>H</td><td>-4.783186</td><td>2.131517</td><td>2.126305</td></tr> <tr><td>C</td><td>-6.544186</td><td>4.491445</td><td>0.249391</td></tr> </tbody> </table> |                         |           | -----     |                         |  |  | C | -1.728181 | 1.003267 | -0.057322 | C | -1.210227 | 1.166801 | -1.497057 | H | -1.470273 | 0.308433 | -2.120442 | H | -1.613235 | 2.069844 | -1.964833 | H | -0.118931 | 1.254945 | -1.479270 | C | -1.138728 | -0.272256 | 0.589406 | H | -0.048522 | -0.175398 | 0.631578 | H | -1.517527 | -0.393176 | 1.608378 | H | -1.390278 | -1.163471 | 0.013424 | C | -1.311980 | 2.218040 | 0.794045 | H | -1.649437 | 3.158631 | 0.349376 | H | -1.720575 | 2.142498 | 1.805844 | H | -0.220771 | 2.254117 | 0.863346 | N | -3.221613 | 0.921949 | 0.076999 | S | -4.143051 | -0.060190 | -0.911664 | O | -3.436215 | -1.298489 | -1.225751 | O | -5.485468 | -0.094781 | -0.330249 | C | -5.212238 | 1.806619 | -2.494300 | H | -6.154382 | 1.515755 | -2.023597 | H | -5.364862 | 1.881712 | -3.572687 | O | -4.262615 | 0.709245 | -2.367066 | C | -4.658282 | 3.122859 | -1.943044 | H | -5.348552 | 3.916081 | -2.266835 | H | -3.703460 | 3.330705 | -2.438052 | C | -4.483729 | 3.196193 | -0.432278 | H | -3.815951 | 2.123770 | -0.092848 | H | -3.769912 | 3.976936 | -0.144817 | C | -5.718680 | 3.202307 | 0.466905 | H | -6.349594 | 2.344922 | 0.203915 | C | -5.326477 | 3.063302 | 1.947025 | H | -4.690115 | 3.899818 | 2.263070 | H | -6.218139 | 3.064136 | 2.582499 | H | -4.783186 | 2.131517 | 2.126305 | C | -6.544186 | 4.491445 | 0.249391 |
| -----                                                                                                                                                                                                                                                                                                                                                                                                                                                                                                                                                                                                                                                                                                                                                                                                                                                                                                                                                                                                                                                                                                                                                                                                                                                                                                                                                                                                                                                                                                                                                                                                                                                                                                                                                                                                                                                                                                                                                                                                                                                                                                                                                                                                                                                                                                                                                                                                                                                                                                                                                                                                                                                                                              |                         |           |           |                         |  |  |   |           |          |           |   |           |          |           |   |           |          |           |   |           |          |           |   |           |          |           |   |           |           |          |   |           |           |          |   |           |           |          |   |           |           |          |   |           |          |          |   |           |          |          |   |           |          |          |   |           |          |          |   |           |          |          |   |           |           |           |   |           |           |           |   |           |           |           |   |           |          |           |   |           |          |           |   |           |          |           |   |           |          |           |   |           |          |           |   |           |          |           |   |           |          |           |   |           |          |           |   |           |          |           |   |           |          |           |   |           |          |          |   |           |          |          |   |           |          |          |   |           |          |          |   |           |          |          |   |           |          |          |   |           |          |          |
| C                                                                                                                                                                                                                                                                                                                                                                                                                                                                                                                                                                                                                                                                                                                                                                                                                                                                                                                                                                                                                                                                                                                                                                                                                                                                                                                                                                                                                                                                                                                                                                                                                                                                                                                                                                                                                                                                                                                                                                                                                                                                                                                                                                                                                                                                                                                                                                                                                                                                                                                                                                                                                                                                                                  | -1.728181               | 1.003267  | -0.057322 |                         |  |  |   |           |          |           |   |           |          |           |   |           |          |           |   |           |          |           |   |           |          |           |   |           |           |          |   |           |           |          |   |           |           |          |   |           |           |          |   |           |          |          |   |           |          |          |   |           |          |          |   |           |          |          |   |           |          |          |   |           |           |           |   |           |           |           |   |           |           |           |   |           |          |           |   |           |          |           |   |           |          |           |   |           |          |           |   |           |          |           |   |           |          |           |   |           |          |           |   |           |          |           |   |           |          |           |   |           |          |           |   |           |          |          |   |           |          |          |   |           |          |          |   |           |          |          |   |           |          |          |   |           |          |          |   |           |          |          |
| C                                                                                                                                                                                                                                                                                                                                                                                                                                                                                                                                                                                                                                                                                                                                                                                                                                                                                                                                                                                                                                                                                                                                                                                                                                                                                                                                                                                                                                                                                                                                                                                                                                                                                                                                                                                                                                                                                                                                                                                                                                                                                                                                                                                                                                                                                                                                                                                                                                                                                                                                                                                                                                                                                                  | -1.210227               | 1.166801  | -1.497057 |                         |  |  |   |           |          |           |   |           |          |           |   |           |          |           |   |           |          |           |   |           |          |           |   |           |           |          |   |           |           |          |   |           |           |          |   |           |           |          |   |           |          |          |   |           |          |          |   |           |          |          |   |           |          |          |   |           |          |          |   |           |           |           |   |           |           |           |   |           |           |           |   |           |          |           |   |           |          |           |   |           |          |           |   |           |          |           |   |           |          |           |   |           |          |           |   |           |          |           |   |           |          |           |   |           |          |           |   |           |          |           |   |           |          |          |   |           |          |          |   |           |          |          |   |           |          |          |   |           |          |          |   |           |          |          |   |           |          |          |
| H                                                                                                                                                                                                                                                                                                                                                                                                                                                                                                                                                                                                                                                                                                                                                                                                                                                                                                                                                                                                                                                                                                                                                                                                                                                                                                                                                                                                                                                                                                                                                                                                                                                                                                                                                                                                                                                                                                                                                                                                                                                                                                                                                                                                                                                                                                                                                                                                                                                                                                                                                                                                                                                                                                  | -1.470273               | 0.308433  | -2.120442 |                         |  |  |   |           |          |           |   |           |          |           |   |           |          |           |   |           |          |           |   |           |          |           |   |           |           |          |   |           |           |          |   |           |           |          |   |           |           |          |   |           |          |          |   |           |          |          |   |           |          |          |   |           |          |          |   |           |          |          |   |           |           |           |   |           |           |           |   |           |           |           |   |           |          |           |   |           |          |           |   |           |          |           |   |           |          |           |   |           |          |           |   |           |          |           |   |           |          |           |   |           |          |           |   |           |          |           |   |           |          |           |   |           |          |          |   |           |          |          |   |           |          |          |   |           |          |          |   |           |          |          |   |           |          |          |   |           |          |          |
| H                                                                                                                                                                                                                                                                                                                                                                                                                                                                                                                                                                                                                                                                                                                                                                                                                                                                                                                                                                                                                                                                                                                                                                                                                                                                                                                                                                                                                                                                                                                                                                                                                                                                                                                                                                                                                                                                                                                                                                                                                                                                                                                                                                                                                                                                                                                                                                                                                                                                                                                                                                                                                                                                                                  | -1.613235               | 2.069844  | -1.964833 |                         |  |  |   |           |          |           |   |           |          |           |   |           |          |           |   |           |          |           |   |           |          |           |   |           |           |          |   |           |           |          |   |           |           |          |   |           |           |          |   |           |          |          |   |           |          |          |   |           |          |          |   |           |          |          |   |           |          |          |   |           |           |           |   |           |           |           |   |           |           |           |   |           |          |           |   |           |          |           |   |           |          |           |   |           |          |           |   |           |          |           |   |           |          |           |   |           |          |           |   |           |          |           |   |           |          |           |   |           |          |           |   |           |          |          |   |           |          |          |   |           |          |          |   |           |          |          |   |           |          |          |   |           |          |          |   |           |          |          |
| H                                                                                                                                                                                                                                                                                                                                                                                                                                                                                                                                                                                                                                                                                                                                                                                                                                                                                                                                                                                                                                                                                                                                                                                                                                                                                                                                                                                                                                                                                                                                                                                                                                                                                                                                                                                                                                                                                                                                                                                                                                                                                                                                                                                                                                                                                                                                                                                                                                                                                                                                                                                                                                                                                                  | -0.118931               | 1.254945  | -1.479270 |                         |  |  |   |           |          |           |   |           |          |           |   |           |          |           |   |           |          |           |   |           |          |           |   |           |           |          |   |           |           |          |   |           |           |          |   |           |           |          |   |           |          |          |   |           |          |          |   |           |          |          |   |           |          |          |   |           |          |          |   |           |           |           |   |           |           |           |   |           |           |           |   |           |          |           |   |           |          |           |   |           |          |           |   |           |          |           |   |           |          |           |   |           |          |           |   |           |          |           |   |           |          |           |   |           |          |           |   |           |          |           |   |           |          |          |   |           |          |          |   |           |          |          |   |           |          |          |   |           |          |          |   |           |          |          |   |           |          |          |
| C                                                                                                                                                                                                                                                                                                                                                                                                                                                                                                                                                                                                                                                                                                                                                                                                                                                                                                                                                                                                                                                                                                                                                                                                                                                                                                                                                                                                                                                                                                                                                                                                                                                                                                                                                                                                                                                                                                                                                                                                                                                                                                                                                                                                                                                                                                                                                                                                                                                                                                                                                                                                                                                                                                  | -1.138728               | -0.272256 | 0.589406  |                         |  |  |   |           |          |           |   |           |          |           |   |           |          |           |   |           |          |           |   |           |          |           |   |           |           |          |   |           |           |          |   |           |           |          |   |           |           |          |   |           |          |          |   |           |          |          |   |           |          |          |   |           |          |          |   |           |          |          |   |           |           |           |   |           |           |           |   |           |           |           |   |           |          |           |   |           |          |           |   |           |          |           |   |           |          |           |   |           |          |           |   |           |          |           |   |           |          |           |   |           |          |           |   |           |          |           |   |           |          |           |   |           |          |          |   |           |          |          |   |           |          |          |   |           |          |          |   |           |          |          |   |           |          |          |   |           |          |          |
| H                                                                                                                                                                                                                                                                                                                                                                                                                                                                                                                                                                                                                                                                                                                                                                                                                                                                                                                                                                                                                                                                                                                                                                                                                                                                                                                                                                                                                                                                                                                                                                                                                                                                                                                                                                                                                                                                                                                                                                                                                                                                                                                                                                                                                                                                                                                                                                                                                                                                                                                                                                                                                                                                                                  | -0.048522               | -0.175398 | 0.631578  |                         |  |  |   |           |          |           |   |           |          |           |   |           |          |           |   |           |          |           |   |           |          |           |   |           |           |          |   |           |           |          |   |           |           |          |   |           |           |          |   |           |          |          |   |           |          |          |   |           |          |          |   |           |          |          |   |           |          |          |   |           |           |           |   |           |           |           |   |           |           |           |   |           |          |           |   |           |          |           |   |           |          |           |   |           |          |           |   |           |          |           |   |           |          |           |   |           |          |           |   |           |          |           |   |           |          |           |   |           |          |           |   |           |          |          |   |           |          |          |   |           |          |          |   |           |          |          |   |           |          |          |   |           |          |          |   |           |          |          |
| H                                                                                                                                                                                                                                                                                                                                                                                                                                                                                                                                                                                                                                                                                                                                                                                                                                                                                                                                                                                                                                                                                                                                                                                                                                                                                                                                                                                                                                                                                                                                                                                                                                                                                                                                                                                                                                                                                                                                                                                                                                                                                                                                                                                                                                                                                                                                                                                                                                                                                                                                                                                                                                                                                                  | -1.517527               | -0.393176 | 1.608378  |                         |  |  |   |           |          |           |   |           |          |           |   |           |          |           |   |           |          |           |   |           |          |           |   |           |           |          |   |           |           |          |   |           |           |          |   |           |           |          |   |           |          |          |   |           |          |          |   |           |          |          |   |           |          |          |   |           |          |          |   |           |           |           |   |           |           |           |   |           |           |           |   |           |          |           |   |           |          |           |   |           |          |           |   |           |          |           |   |           |          |           |   |           |          |           |   |           |          |           |   |           |          |           |   |           |          |           |   |           |          |           |   |           |          |          |   |           |          |          |   |           |          |          |   |           |          |          |   |           |          |          |   |           |          |          |   |           |          |          |
| H                                                                                                                                                                                                                                                                                                                                                                                                                                                                                                                                                                                                                                                                                                                                                                                                                                                                                                                                                                                                                                                                                                                                                                                                                                                                                                                                                                                                                                                                                                                                                                                                                                                                                                                                                                                                                                                                                                                                                                                                                                                                                                                                                                                                                                                                                                                                                                                                                                                                                                                                                                                                                                                                                                  | -1.390278               | -1.163471 | 0.013424  |                         |  |  |   |           |          |           |   |           |          |           |   |           |          |           |   |           |          |           |   |           |          |           |   |           |           |          |   |           |           |          |   |           |           |          |   |           |           |          |   |           |          |          |   |           |          |          |   |           |          |          |   |           |          |          |   |           |          |          |   |           |           |           |   |           |           |           |   |           |           |           |   |           |          |           |   |           |          |           |   |           |          |           |   |           |          |           |   |           |          |           |   |           |          |           |   |           |          |           |   |           |          |           |   |           |          |           |   |           |          |           |   |           |          |          |   |           |          |          |   |           |          |          |   |           |          |          |   |           |          |          |   |           |          |          |   |           |          |          |
| C                                                                                                                                                                                                                                                                                                                                                                                                                                                                                                                                                                                                                                                                                                                                                                                                                                                                                                                                                                                                                                                                                                                                                                                                                                                                                                                                                                                                                                                                                                                                                                                                                                                                                                                                                                                                                                                                                                                                                                                                                                                                                                                                                                                                                                                                                                                                                                                                                                                                                                                                                                                                                                                                                                  | -1.311980               | 2.218040  | 0.794045  |                         |  |  |   |           |          |           |   |           |          |           |   |           |          |           |   |           |          |           |   |           |          |           |   |           |           |          |   |           |           |          |   |           |           |          |   |           |           |          |   |           |          |          |   |           |          |          |   |           |          |          |   |           |          |          |   |           |          |          |   |           |           |           |   |           |           |           |   |           |           |           |   |           |          |           |   |           |          |           |   |           |          |           |   |           |          |           |   |           |          |           |   |           |          |           |   |           |          |           |   |           |          |           |   |           |          |           |   |           |          |           |   |           |          |          |   |           |          |          |   |           |          |          |   |           |          |          |   |           |          |          |   |           |          |          |   |           |          |          |
| H                                                                                                                                                                                                                                                                                                                                                                                                                                                                                                                                                                                                                                                                                                                                                                                                                                                                                                                                                                                                                                                                                                                                                                                                                                                                                                                                                                                                                                                                                                                                                                                                                                                                                                                                                                                                                                                                                                                                                                                                                                                                                                                                                                                                                                                                                                                                                                                                                                                                                                                                                                                                                                                                                                  | -1.649437               | 3.158631  | 0.349376  |                         |  |  |   |           |          |           |   |           |          |           |   |           |          |           |   |           |          |           |   |           |          |           |   |           |           |          |   |           |           |          |   |           |           |          |   |           |           |          |   |           |          |          |   |           |          |          |   |           |          |          |   |           |          |          |   |           |          |          |   |           |           |           |   |           |           |           |   |           |           |           |   |           |          |           |   |           |          |           |   |           |          |           |   |           |          |           |   |           |          |           |   |           |          |           |   |           |          |           |   |           |          |           |   |           |          |           |   |           |          |           |   |           |          |          |   |           |          |          |   |           |          |          |   |           |          |          |   |           |          |          |   |           |          |          |   |           |          |          |
| H                                                                                                                                                                                                                                                                                                                                                                                                                                                                                                                                                                                                                                                                                                                                                                                                                                                                                                                                                                                                                                                                                                                                                                                                                                                                                                                                                                                                                                                                                                                                                                                                                                                                                                                                                                                                                                                                                                                                                                                                                                                                                                                                                                                                                                                                                                                                                                                                                                                                                                                                                                                                                                                                                                  | -1.720575               | 2.142498  | 1.805844  |                         |  |  |   |           |          |           |   |           |          |           |   |           |          |           |   |           |          |           |   |           |          |           |   |           |           |          |   |           |           |          |   |           |           |          |   |           |           |          |   |           |          |          |   |           |          |          |   |           |          |          |   |           |          |          |   |           |          |          |   |           |           |           |   |           |           |           |   |           |           |           |   |           |          |           |   |           |          |           |   |           |          |           |   |           |          |           |   |           |          |           |   |           |          |           |   |           |          |           |   |           |          |           |   |           |          |           |   |           |          |           |   |           |          |          |   |           |          |          |   |           |          |          |   |           |          |          |   |           |          |          |   |           |          |          |   |           |          |          |
| H                                                                                                                                                                                                                                                                                                                                                                                                                                                                                                                                                                                                                                                                                                                                                                                                                                                                                                                                                                                                                                                                                                                                                                                                                                                                                                                                                                                                                                                                                                                                                                                                                                                                                                                                                                                                                                                                                                                                                                                                                                                                                                                                                                                                                                                                                                                                                                                                                                                                                                                                                                                                                                                                                                  | -0.220771               | 2.254117  | 0.863346  |                         |  |  |   |           |          |           |   |           |          |           |   |           |          |           |   |           |          |           |   |           |          |           |   |           |           |          |   |           |           |          |   |           |           |          |   |           |           |          |   |           |          |          |   |           |          |          |   |           |          |          |   |           |          |          |   |           |          |          |   |           |           |           |   |           |           |           |   |           |           |           |   |           |          |           |   |           |          |           |   |           |          |           |   |           |          |           |   |           |          |           |   |           |          |           |   |           |          |           |   |           |          |           |   |           |          |           |   |           |          |           |   |           |          |          |   |           |          |          |   |           |          |          |   |           |          |          |   |           |          |          |   |           |          |          |   |           |          |          |
| N                                                                                                                                                                                                                                                                                                                                                                                                                                                                                                                                                                                                                                                                                                                                                                                                                                                                                                                                                                                                                                                                                                                                                                                                                                                                                                                                                                                                                                                                                                                                                                                                                                                                                                                                                                                                                                                                                                                                                                                                                                                                                                                                                                                                                                                                                                                                                                                                                                                                                                                                                                                                                                                                                                  | -3.221613               | 0.921949  | 0.076999  |                         |  |  |   |           |          |           |   |           |          |           |   |           |          |           |   |           |          |           |   |           |          |           |   |           |           |          |   |           |           |          |   |           |           |          |   |           |           |          |   |           |          |          |   |           |          |          |   |           |          |          |   |           |          |          |   |           |          |          |   |           |           |           |   |           |           |           |   |           |           |           |   |           |          |           |   |           |          |           |   |           |          |           |   |           |          |           |   |           |          |           |   |           |          |           |   |           |          |           |   |           |          |           |   |           |          |           |   |           |          |           |   |           |          |          |   |           |          |          |   |           |          |          |   |           |          |          |   |           |          |          |   |           |          |          |   |           |          |          |
| S                                                                                                                                                                                                                                                                                                                                                                                                                                                                                                                                                                                                                                                                                                                                                                                                                                                                                                                                                                                                                                                                                                                                                                                                                                                                                                                                                                                                                                                                                                                                                                                                                                                                                                                                                                                                                                                                                                                                                                                                                                                                                                                                                                                                                                                                                                                                                                                                                                                                                                                                                                                                                                                                                                  | -4.143051               | -0.060190 | -0.911664 |                         |  |  |   |           |          |           |   |           |          |           |   |           |          |           |   |           |          |           |   |           |          |           |   |           |           |          |   |           |           |          |   |           |           |          |   |           |           |          |   |           |          |          |   |           |          |          |   |           |          |          |   |           |          |          |   |           |          |          |   |           |           |           |   |           |           |           |   |           |           |           |   |           |          |           |   |           |          |           |   |           |          |           |   |           |          |           |   |           |          |           |   |           |          |           |   |           |          |           |   |           |          |           |   |           |          |           |   |           |          |           |   |           |          |          |   |           |          |          |   |           |          |          |   |           |          |          |   |           |          |          |   |           |          |          |   |           |          |          |
| O                                                                                                                                                                                                                                                                                                                                                                                                                                                                                                                                                                                                                                                                                                                                                                                                                                                                                                                                                                                                                                                                                                                                                                                                                                                                                                                                                                                                                                                                                                                                                                                                                                                                                                                                                                                                                                                                                                                                                                                                                                                                                                                                                                                                                                                                                                                                                                                                                                                                                                                                                                                                                                                                                                  | -3.436215               | -1.298489 | -1.225751 |                         |  |  |   |           |          |           |   |           |          |           |   |           |          |           |   |           |          |           |   |           |          |           |   |           |           |          |   |           |           |          |   |           |           |          |   |           |           |          |   |           |          |          |   |           |          |          |   |           |          |          |   |           |          |          |   |           |          |          |   |           |           |           |   |           |           |           |   |           |           |           |   |           |          |           |   |           |          |           |   |           |          |           |   |           |          |           |   |           |          |           |   |           |          |           |   |           |          |           |   |           |          |           |   |           |          |           |   |           |          |           |   |           |          |          |   |           |          |          |   |           |          |          |   |           |          |          |   |           |          |          |   |           |          |          |   |           |          |          |
| O                                                                                                                                                                                                                                                                                                                                                                                                                                                                                                                                                                                                                                                                                                                                                                                                                                                                                                                                                                                                                                                                                                                                                                                                                                                                                                                                                                                                                                                                                                                                                                                                                                                                                                                                                                                                                                                                                                                                                                                                                                                                                                                                                                                                                                                                                                                                                                                                                                                                                                                                                                                                                                                                                                  | -5.485468               | -0.094781 | -0.330249 |                         |  |  |   |           |          |           |   |           |          |           |   |           |          |           |   |           |          |           |   |           |          |           |   |           |           |          |   |           |           |          |   |           |           |          |   |           |           |          |   |           |          |          |   |           |          |          |   |           |          |          |   |           |          |          |   |           |          |          |   |           |           |           |   |           |           |           |   |           |           |           |   |           |          |           |   |           |          |           |   |           |          |           |   |           |          |           |   |           |          |           |   |           |          |           |   |           |          |           |   |           |          |           |   |           |          |           |   |           |          |           |   |           |          |          |   |           |          |          |   |           |          |          |   |           |          |          |   |           |          |          |   |           |          |          |   |           |          |          |
| C                                                                                                                                                                                                                                                                                                                                                                                                                                                                                                                                                                                                                                                                                                                                                                                                                                                                                                                                                                                                                                                                                                                                                                                                                                                                                                                                                                                                                                                                                                                                                                                                                                                                                                                                                                                                                                                                                                                                                                                                                                                                                                                                                                                                                                                                                                                                                                                                                                                                                                                                                                                                                                                                                                  | -5.212238               | 1.806619  | -2.494300 |                         |  |  |   |           |          |           |   |           |          |           |   |           |          |           |   |           |          |           |   |           |          |           |   |           |           |          |   |           |           |          |   |           |           |          |   |           |           |          |   |           |          |          |   |           |          |          |   |           |          |          |   |           |          |          |   |           |          |          |   |           |           |           |   |           |           |           |   |           |           |           |   |           |          |           |   |           |          |           |   |           |          |           |   |           |          |           |   |           |          |           |   |           |          |           |   |           |          |           |   |           |          |           |   |           |          |           |   |           |          |           |   |           |          |          |   |           |          |          |   |           |          |          |   |           |          |          |   |           |          |          |   |           |          |          |   |           |          |          |
| H                                                                                                                                                                                                                                                                                                                                                                                                                                                                                                                                                                                                                                                                                                                                                                                                                                                                                                                                                                                                                                                                                                                                                                                                                                                                                                                                                                                                                                                                                                                                                                                                                                                                                                                                                                                                                                                                                                                                                                                                                                                                                                                                                                                                                                                                                                                                                                                                                                                                                                                                                                                                                                                                                                  | -6.154382               | 1.515755  | -2.023597 |                         |  |  |   |           |          |           |   |           |          |           |   |           |          |           |   |           |          |           |   |           |          |           |   |           |           |          |   |           |           |          |   |           |           |          |   |           |           |          |   |           |          |          |   |           |          |          |   |           |          |          |   |           |          |          |   |           |          |          |   |           |           |           |   |           |           |           |   |           |           |           |   |           |          |           |   |           |          |           |   |           |          |           |   |           |          |           |   |           |          |           |   |           |          |           |   |           |          |           |   |           |          |           |   |           |          |           |   |           |          |           |   |           |          |          |   |           |          |          |   |           |          |          |   |           |          |          |   |           |          |          |   |           |          |          |   |           |          |          |
| H                                                                                                                                                                                                                                                                                                                                                                                                                                                                                                                                                                                                                                                                                                                                                                                                                                                                                                                                                                                                                                                                                                                                                                                                                                                                                                                                                                                                                                                                                                                                                                                                                                                                                                                                                                                                                                                                                                                                                                                                                                                                                                                                                                                                                                                                                                                                                                                                                                                                                                                                                                                                                                                                                                  | -5.364862               | 1.881712  | -3.572687 |                         |  |  |   |           |          |           |   |           |          |           |   |           |          |           |   |           |          |           |   |           |          |           |   |           |           |          |   |           |           |          |   |           |           |          |   |           |           |          |   |           |          |          |   |           |          |          |   |           |          |          |   |           |          |          |   |           |          |          |   |           |           |           |   |           |           |           |   |           |           |           |   |           |          |           |   |           |          |           |   |           |          |           |   |           |          |           |   |           |          |           |   |           |          |           |   |           |          |           |   |           |          |           |   |           |          |           |   |           |          |           |   |           |          |          |   |           |          |          |   |           |          |          |   |           |          |          |   |           |          |          |   |           |          |          |   |           |          |          |
| O                                                                                                                                                                                                                                                                                                                                                                                                                                                                                                                                                                                                                                                                                                                                                                                                                                                                                                                                                                                                                                                                                                                                                                                                                                                                                                                                                                                                                                                                                                                                                                                                                                                                                                                                                                                                                                                                                                                                                                                                                                                                                                                                                                                                                                                                                                                                                                                                                                                                                                                                                                                                                                                                                                  | -4.262615               | 0.709245  | -2.367066 |                         |  |  |   |           |          |           |   |           |          |           |   |           |          |           |   |           |          |           |   |           |          |           |   |           |           |          |   |           |           |          |   |           |           |          |   |           |           |          |   |           |          |          |   |           |          |          |   |           |          |          |   |           |          |          |   |           |          |          |   |           |           |           |   |           |           |           |   |           |           |           |   |           |          |           |   |           |          |           |   |           |          |           |   |           |          |           |   |           |          |           |   |           |          |           |   |           |          |           |   |           |          |           |   |           |          |           |   |           |          |           |   |           |          |          |   |           |          |          |   |           |          |          |   |           |          |          |   |           |          |          |   |           |          |          |   |           |          |          |
| C                                                                                                                                                                                                                                                                                                                                                                                                                                                                                                                                                                                                                                                                                                                                                                                                                                                                                                                                                                                                                                                                                                                                                                                                                                                                                                                                                                                                                                                                                                                                                                                                                                                                                                                                                                                                                                                                                                                                                                                                                                                                                                                                                                                                                                                                                                                                                                                                                                                                                                                                                                                                                                                                                                  | -4.658282               | 3.122859  | -1.943044 |                         |  |  |   |           |          |           |   |           |          |           |   |           |          |           |   |           |          |           |   |           |          |           |   |           |           |          |   |           |           |          |   |           |           |          |   |           |           |          |   |           |          |          |   |           |          |          |   |           |          |          |   |           |          |          |   |           |          |          |   |           |           |           |   |           |           |           |   |           |           |           |   |           |          |           |   |           |          |           |   |           |          |           |   |           |          |           |   |           |          |           |   |           |          |           |   |           |          |           |   |           |          |           |   |           |          |           |   |           |          |           |   |           |          |          |   |           |          |          |   |           |          |          |   |           |          |          |   |           |          |          |   |           |          |          |   |           |          |          |
| H                                                                                                                                                                                                                                                                                                                                                                                                                                                                                                                                                                                                                                                                                                                                                                                                                                                                                                                                                                                                                                                                                                                                                                                                                                                                                                                                                                                                                                                                                                                                                                                                                                                                                                                                                                                                                                                                                                                                                                                                                                                                                                                                                                                                                                                                                                                                                                                                                                                                                                                                                                                                                                                                                                  | -5.348552               | 3.916081  | -2.266835 |                         |  |  |   |           |          |           |   |           |          |           |   |           |          |           |   |           |          |           |   |           |          |           |   |           |           |          |   |           |           |          |   |           |           |          |   |           |           |          |   |           |          |          |   |           |          |          |   |           |          |          |   |           |          |          |   |           |          |          |   |           |           |           |   |           |           |           |   |           |           |           |   |           |          |           |   |           |          |           |   |           |          |           |   |           |          |           |   |           |          |           |   |           |          |           |   |           |          |           |   |           |          |           |   |           |          |           |   |           |          |           |   |           |          |          |   |           |          |          |   |           |          |          |   |           |          |          |   |           |          |          |   |           |          |          |   |           |          |          |
| H                                                                                                                                                                                                                                                                                                                                                                                                                                                                                                                                                                                                                                                                                                                                                                                                                                                                                                                                                                                                                                                                                                                                                                                                                                                                                                                                                                                                                                                                                                                                                                                                                                                                                                                                                                                                                                                                                                                                                                                                                                                                                                                                                                                                                                                                                                                                                                                                                                                                                                                                                                                                                                                                                                  | -3.703460               | 3.330705  | -2.438052 |                         |  |  |   |           |          |           |   |           |          |           |   |           |          |           |   |           |          |           |   |           |          |           |   |           |           |          |   |           |           |          |   |           |           |          |   |           |           |          |   |           |          |          |   |           |          |          |   |           |          |          |   |           |          |          |   |           |          |          |   |           |           |           |   |           |           |           |   |           |           |           |   |           |          |           |   |           |          |           |   |           |          |           |   |           |          |           |   |           |          |           |   |           |          |           |   |           |          |           |   |           |          |           |   |           |          |           |   |           |          |           |   |           |          |          |   |           |          |          |   |           |          |          |   |           |          |          |   |           |          |          |   |           |          |          |   |           |          |          |
| C                                                                                                                                                                                                                                                                                                                                                                                                                                                                                                                                                                                                                                                                                                                                                                                                                                                                                                                                                                                                                                                                                                                                                                                                                                                                                                                                                                                                                                                                                                                                                                                                                                                                                                                                                                                                                                                                                                                                                                                                                                                                                                                                                                                                                                                                                                                                                                                                                                                                                                                                                                                                                                                                                                  | -4.483729               | 3.196193  | -0.432278 |                         |  |  |   |           |          |           |   |           |          |           |   |           |          |           |   |           |          |           |   |           |          |           |   |           |           |          |   |           |           |          |   |           |           |          |   |           |           |          |   |           |          |          |   |           |          |          |   |           |          |          |   |           |          |          |   |           |          |          |   |           |           |           |   |           |           |           |   |           |           |           |   |           |          |           |   |           |          |           |   |           |          |           |   |           |          |           |   |           |          |           |   |           |          |           |   |           |          |           |   |           |          |           |   |           |          |           |   |           |          |           |   |           |          |          |   |           |          |          |   |           |          |          |   |           |          |          |   |           |          |          |   |           |          |          |   |           |          |          |
| H                                                                                                                                                                                                                                                                                                                                                                                                                                                                                                                                                                                                                                                                                                                                                                                                                                                                                                                                                                                                                                                                                                                                                                                                                                                                                                                                                                                                                                                                                                                                                                                                                                                                                                                                                                                                                                                                                                                                                                                                                                                                                                                                                                                                                                                                                                                                                                                                                                                                                                                                                                                                                                                                                                  | -3.815951               | 2.123770  | -0.092848 |                         |  |  |   |           |          |           |   |           |          |           |   |           |          |           |   |           |          |           |   |           |          |           |   |           |           |          |   |           |           |          |   |           |           |          |   |           |           |          |   |           |          |          |   |           |          |          |   |           |          |          |   |           |          |          |   |           |          |          |   |           |           |           |   |           |           |           |   |           |           |           |   |           |          |           |   |           |          |           |   |           |          |           |   |           |          |           |   |           |          |           |   |           |          |           |   |           |          |           |   |           |          |           |   |           |          |           |   |           |          |           |   |           |          |          |   |           |          |          |   |           |          |          |   |           |          |          |   |           |          |          |   |           |          |          |   |           |          |          |
| H                                                                                                                                                                                                                                                                                                                                                                                                                                                                                                                                                                                                                                                                                                                                                                                                                                                                                                                                                                                                                                                                                                                                                                                                                                                                                                                                                                                                                                                                                                                                                                                                                                                                                                                                                                                                                                                                                                                                                                                                                                                                                                                                                                                                                                                                                                                                                                                                                                                                                                                                                                                                                                                                                                  | -3.769912               | 3.976936  | -0.144817 |                         |  |  |   |           |          |           |   |           |          |           |   |           |          |           |   |           |          |           |   |           |          |           |   |           |           |          |   |           |           |          |   |           |           |          |   |           |           |          |   |           |          |          |   |           |          |          |   |           |          |          |   |           |          |          |   |           |          |          |   |           |           |           |   |           |           |           |   |           |           |           |   |           |          |           |   |           |          |           |   |           |          |           |   |           |          |           |   |           |          |           |   |           |          |           |   |           |          |           |   |           |          |           |   |           |          |           |   |           |          |           |   |           |          |          |   |           |          |          |   |           |          |          |   |           |          |          |   |           |          |          |   |           |          |          |   |           |          |          |
| C                                                                                                                                                                                                                                                                                                                                                                                                                                                                                                                                                                                                                                                                                                                                                                                                                                                                                                                                                                                                                                                                                                                                                                                                                                                                                                                                                                                                                                                                                                                                                                                                                                                                                                                                                                                                                                                                                                                                                                                                                                                                                                                                                                                                                                                                                                                                                                                                                                                                                                                                                                                                                                                                                                  | -5.718680               | 3.202307  | 0.466905  |                         |  |  |   |           |          |           |   |           |          |           |   |           |          |           |   |           |          |           |   |           |          |           |   |           |           |          |   |           |           |          |   |           |           |          |   |           |           |          |   |           |          |          |   |           |          |          |   |           |          |          |   |           |          |          |   |           |          |          |   |           |           |           |   |           |           |           |   |           |           |           |   |           |          |           |   |           |          |           |   |           |          |           |   |           |          |           |   |           |          |           |   |           |          |           |   |           |          |           |   |           |          |           |   |           |          |           |   |           |          |           |   |           |          |          |   |           |          |          |   |           |          |          |   |           |          |          |   |           |          |          |   |           |          |          |   |           |          |          |
| H                                                                                                                                                                                                                                                                                                                                                                                                                                                                                                                                                                                                                                                                                                                                                                                                                                                                                                                                                                                                                                                                                                                                                                                                                                                                                                                                                                                                                                                                                                                                                                                                                                                                                                                                                                                                                                                                                                                                                                                                                                                                                                                                                                                                                                                                                                                                                                                                                                                                                                                                                                                                                                                                                                  | -6.349594               | 2.344922  | 0.203915  |                         |  |  |   |           |          |           |   |           |          |           |   |           |          |           |   |           |          |           |   |           |          |           |   |           |           |          |   |           |           |          |   |           |           |          |   |           |           |          |   |           |          |          |   |           |          |          |   |           |          |          |   |           |          |          |   |           |          |          |   |           |           |           |   |           |           |           |   |           |           |           |   |           |          |           |   |           |          |           |   |           |          |           |   |           |          |           |   |           |          |           |   |           |          |           |   |           |          |           |   |           |          |           |   |           |          |           |   |           |          |           |   |           |          |          |   |           |          |          |   |           |          |          |   |           |          |          |   |           |          |          |   |           |          |          |   |           |          |          |
| C                                                                                                                                                                                                                                                                                                                                                                                                                                                                                                                                                                                                                                                                                                                                                                                                                                                                                                                                                                                                                                                                                                                                                                                                                                                                                                                                                                                                                                                                                                                                                                                                                                                                                                                                                                                                                                                                                                                                                                                                                                                                                                                                                                                                                                                                                                                                                                                                                                                                                                                                                                                                                                                                                                  | -5.326477               | 3.063302  | 1.947025  |                         |  |  |   |           |          |           |   |           |          |           |   |           |          |           |   |           |          |           |   |           |          |           |   |           |           |          |   |           |           |          |   |           |           |          |   |           |           |          |   |           |          |          |   |           |          |          |   |           |          |          |   |           |          |          |   |           |          |          |   |           |           |           |   |           |           |           |   |           |           |           |   |           |          |           |   |           |          |           |   |           |          |           |   |           |          |           |   |           |          |           |   |           |          |           |   |           |          |           |   |           |          |           |   |           |          |           |   |           |          |           |   |           |          |          |   |           |          |          |   |           |          |          |   |           |          |          |   |           |          |          |   |           |          |          |   |           |          |          |
| H                                                                                                                                                                                                                                                                                                                                                                                                                                                                                                                                                                                                                                                                                                                                                                                                                                                                                                                                                                                                                                                                                                                                                                                                                                                                                                                                                                                                                                                                                                                                                                                                                                                                                                                                                                                                                                                                                                                                                                                                                                                                                                                                                                                                                                                                                                                                                                                                                                                                                                                                                                                                                                                                                                  | -4.690115               | 3.899818  | 2.263070  |                         |  |  |   |           |          |           |   |           |          |           |   |           |          |           |   |           |          |           |   |           |          |           |   |           |           |          |   |           |           |          |   |           |           |          |   |           |           |          |   |           |          |          |   |           |          |          |   |           |          |          |   |           |          |          |   |           |          |          |   |           |           |           |   |           |           |           |   |           |           |           |   |           |          |           |   |           |          |           |   |           |          |           |   |           |          |           |   |           |          |           |   |           |          |           |   |           |          |           |   |           |          |           |   |           |          |           |   |           |          |           |   |           |          |          |   |           |          |          |   |           |          |          |   |           |          |          |   |           |          |          |   |           |          |          |   |           |          |          |
| H                                                                                                                                                                                                                                                                                                                                                                                                                                                                                                                                                                                                                                                                                                                                                                                                                                                                                                                                                                                                                                                                                                                                                                                                                                                                                                                                                                                                                                                                                                                                                                                                                                                                                                                                                                                                                                                                                                                                                                                                                                                                                                                                                                                                                                                                                                                                                                                                                                                                                                                                                                                                                                                                                                  | -6.218139               | 3.064136  | 2.582499  |                         |  |  |   |           |          |           |   |           |          |           |   |           |          |           |   |           |          |           |   |           |          |           |   |           |           |          |   |           |           |          |   |           |           |          |   |           |           |          |   |           |          |          |   |           |          |          |   |           |          |          |   |           |          |          |   |           |          |          |   |           |           |           |   |           |           |           |   |           |           |           |   |           |          |           |   |           |          |           |   |           |          |           |   |           |          |           |   |           |          |           |   |           |          |           |   |           |          |           |   |           |          |           |   |           |          |           |   |           |          |           |   |           |          |          |   |           |          |          |   |           |          |          |   |           |          |          |   |           |          |          |   |           |          |          |   |           |          |          |
| H                                                                                                                                                                                                                                                                                                                                                                                                                                                                                                                                                                                                                                                                                                                                                                                                                                                                                                                                                                                                                                                                                                                                                                                                                                                                                                                                                                                                                                                                                                                                                                                                                                                                                                                                                                                                                                                                                                                                                                                                                                                                                                                                                                                                                                                                                                                                                                                                                                                                                                                                                                                                                                                                                                  | -4.783186               | 2.131517  | 2.126305  |                         |  |  |   |           |          |           |   |           |          |           |   |           |          |           |   |           |          |           |   |           |          |           |   |           |           |          |   |           |           |          |   |           |           |          |   |           |           |          |   |           |          |          |   |           |          |          |   |           |          |          |   |           |          |          |   |           |          |          |   |           |           |           |   |           |           |           |   |           |           |           |   |           |          |           |   |           |          |           |   |           |          |           |   |           |          |           |   |           |          |           |   |           |          |           |   |           |          |           |   |           |          |           |   |           |          |           |   |           |          |           |   |           |          |          |   |           |          |          |   |           |          |          |   |           |          |          |   |           |          |          |   |           |          |          |   |           |          |          |
| C                                                                                                                                                                                                                                                                                                                                                                                                                                                                                                                                                                                                                                                                                                                                                                                                                                                                                                                                                                                                                                                                                                                                                                                                                                                                                                                                                                                                                                                                                                                                                                                                                                                                                                                                                                                                                                                                                                                                                                                                                                                                                                                                                                                                                                                                                                                                                                                                                                                                                                                                                                                                                                                                                                  | -6.544186               | 4.491445  | 0.249391  |                         |  |  |   |           |          |           |   |           |          |           |   |           |          |           |   |           |          |           |   |           |          |           |   |           |           |          |   |           |           |          |   |           |           |          |   |           |           |          |   |           |          |          |   |           |          |          |   |           |          |          |   |           |          |          |   |           |          |          |   |           |           |           |   |           |           |           |   |           |           |           |   |           |          |           |   |           |          |           |   |           |          |           |   |           |          |           |   |           |          |           |   |           |          |           |   |           |          |           |   |           |          |           |   |           |          |           |   |           |          |           |   |           |          |          |   |           |          |          |   |           |          |          |   |           |          |          |   |           |          |          |   |           |          |          |   |           |          |          |



|       |   |           |                         |           |           |
|-------|---|-----------|-------------------------|-----------|-----------|
|       |   | H         | -6.905382               | 4.585577  | -0.779362 |
|       |   | H         | -7.418963               | 4.487155  | 0.908750  |
|       |   | H         | -5.950326               | 5.382785  | 0.485554  |
| 8     |   |           |                         |           |           |
| Atom  |   |           | Coordinates (Angstroms) |           |           |
|       |   | X         | Y                       | Z         |           |
| ----- |   |           |                         |           |           |
|       | C | -0.620757 | 0.612072                | 0.010560  |           |
|       | C | 0.515080  | 1.199672                | -0.851682 |           |
|       | H | 0.571577  | 0.701560                | -1.821818 |           |
|       | H | 0.368798  | 2.270226                | -1.020605 |           |
|       | H | 1.472305  | 1.069014                | -0.335904 |           |
|       | C | -0.349003 | -0.887430               | 0.269036  |           |
|       | H | 0.573124  | -0.969776               | 0.853223  |           |
|       | H | -1.163479 | -1.346862               | 0.833587  |           |
|       | H | -0.208867 | -1.448731               | -0.657782 |           |
|       | C | -0.699831 | 1.331831                | 1.368231  |           |
|       | H | -0.889305 | 2.400112                | 1.248489  |           |
|       | H | -1.497200 | 0.904318                | 1.983130  |           |
|       | H | 0.249669  | 1.218024                | 1.901280  |           |
|       | N | -1.972759 | 0.798550                | -0.622541 |           |
|       | S | -2.390152 | -0.204657               | -1.906790 |           |
|       | O | -1.420816 | -0.265045               | -3.003708 |           |
|       | O | -2.896275 | -1.462608               | -1.345899 |           |
|       | C | -4.816712 | 0.907075                | -1.719552 |           |
|       | H | -4.667507 | 0.526489                | -0.706353 |           |
|       | H | -5.630174 | 0.351620                | -2.192734 |           |
|       | C | -5.075365 | 2.405585                | -1.740325 |           |
|       | H | -5.120206 | 2.740910                | -2.782943 |           |
|       | H | -6.079256 | 2.563019                | -1.325048 |           |
|       | C | -4.087521 | 3.261471                | -0.930674 |           |
|       | H | -4.448658 | 4.302586                | -0.961335 |           |
|       | C | -2.611882 | 3.304166                | -1.348972 |           |
|       | H | -4.137879 | 2.963673                | 0.125035  |           |
|       | H | -2.190606 | 2.094583                | -1.028532 |           |
|       | C | -1.828468 | 4.277150                | -0.476449 |           |
|       | H | -2.032232 | 4.136781                | 0.589122  |           |
|       | H | -0.749498 | 4.206160                | -0.641614 |           |
|       | H | -2.126459 | 5.304915                | -0.732051 |           |

Supporting Information for Sulfamides Direct Radical-Mediated Chlorination

|   |                                                                                   |                                                                                    |      |                         |           |           |
|---|-----------------------------------------------------------------------------------|------------------------------------------------------------------------------------|------|-------------------------|-----------|-----------|
|   |                                                                                   |                                                                                    | C    | -2.328020               | 3.499541  | -2.830045 |
|   |                                                                                   |                                                                                    | H    | -1.251136               | 3.513619  | -3.025056 |
|   |                                                                                   |                                                                                    | H    | -2.777827               | 2.724593  | -3.451356 |
|   |                                                                                   |                                                                                    | H    | -2.731785               | 4.472066  | -3.151590 |
|   |                                                                                   |                                                                                    | O    | -3.624501               | 0.641285  | -2.527222 |
| 9 | 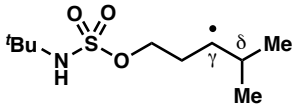 |  |      |                         |           |           |
|   |                                                                                   |                                                                                    | Atom | Coordinates (Angstroms) |           |           |
|   |                                                                                   |                                                                                    |      | X                       | Y         | Z         |
|   |                                                                                   |                                                                                    |      | -----                   |           |           |
|   |                                                                                   |                                                                                    | C    | 1.163916                | -0.020978 | 0.211475  |
|   |                                                                                   |                                                                                    | C    | 1.319786                | -1.191045 | 1.200420  |
|   |                                                                                   |                                                                                    | H    | 0.556724                | -1.149552 | 1.980925  |
|   |                                                                                   |                                                                                    | H    | 1.233122                | -2.151712 | 0.680677  |
|   |                                                                                   |                                                                                    | H    | 2.305799                | -1.151924 | 1.675475  |
|   |                                                                                   |                                                                                    | C    | 1.284264                | 1.329096  | 0.932770  |
|   |                                                                                   |                                                                                    | H    | 2.283458                | 1.409448  | 1.371424  |
|   |                                                                                   |                                                                                    | H    | 1.142479                | 2.158757  | 0.235090  |
|   |                                                                                   |                                                                                    | H    | 0.555645                | 1.420938  | 1.742065  |
|   |                                                                                   |                                                                                    | C    | 2.227616                | -0.115891 | -0.896301 |
|   |                                                                                   |                                                                                    | H    | 2.144586                | -1.059263 | -1.448583 |
|   |                                                                                   |                                                                                    | H    | 2.128010                | 0.711304  | -1.604947 |
|   |                                                                                   |                                                                                    | H    | 3.226820                | -0.078982 | -0.451948 |
|   |                                                                                   |                                                                                    | N    | -0.145188               | -0.099251 | -0.517151 |
|   |                                                                                   |                                                                                    | S    | -1.634553               | 0.175406  | 0.142222  |
|   |                                                                                   |                                                                                    | O    | -2.596195               | -0.524979 | -0.711975 |
|   |                                                                                   |                                                                                    | O    | -1.686772               | -0.023707 | 1.594934  |
|   |                                                                                   |                                                                                    | C    | -2.674226               | 2.561369  | 0.671787  |
|   |                                                                                   |                                                                                    | H    | -2.581277               | 2.259331  | 1.717667  |
|   |                                                                                   |                                                                                    | H    | -2.301016               | 3.582131  | 0.560594  |
|   |                                                                                   |                                                                                    | C    | -4.114639               | 2.444580  | 0.167529  |
|   |                                                                                   |                                                                                    | H    | -4.098715               | 2.600819  | -0.924728 |
|   |                                                                                   |                                                                                    | H    | -4.484355               | 1.425156  | 0.327445  |
|   |                                                                                   |                                                                                    | C    | -5.009344               | 3.435982  | 0.844468  |
|   |                                                                                   |                                                                                    | H    | -4.693896               | 4.480129  | 0.860356  |
|   |                                                                                   |                                                                                    | H    | -0.225622               | -0.882966 | -1.159480 |
|   |                                                                                   |                                                                                    | C    | -6.422790               | 3.115887  | 1.232064  |
|   |                                                                                   |                                                                                    | H    | -6.430280               | 2.110096  | 1.681441  |
|   |                                                                                   |                                                                                    | C    | -7.351909               | 3.056624  | -0.008453 |
|   |                                                                                   |                                                                                    | H    | -7.405371               | 4.035922  | -0.498687 |
|   |                                                                                   |                                                                                    | H    | -6.992136               | 2.328747  | -0.743009 |
|   |                                                                                   |                                                                                    | H    | -8.367813               | 2.766782  | 0.285445  |

|    |                                                                                   |                                                                                    |                         |           |           |
|----|-----------------------------------------------------------------------------------|------------------------------------------------------------------------------------|-------------------------|-----------|-----------|
|    |                                                                                   | C                                                                                  | -6.966949               | 4.111190  | 2.269898  |
|    |                                                                                   | H                                                                                  | -7.991273               | 3.854167  | 2.561289  |
|    |                                                                                   | H                                                                                  | -6.348554               | 4.120420  | 3.173765  |
|    |                                                                                   | H                                                                                  | -6.981893               | 5.129274  | 1.861075  |
|    |                                                                                   | O                                                                                  | -1.729877               | 1.782650  | -0.131831 |
| 10 | 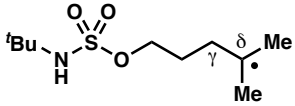 |  |                         |           |           |
|    |                                                                                   | Atom                                                                               | Coordinates (Angstroms) |           |           |
|    |                                                                                   |                                                                                    | X                       | Y         | Z         |
|    |                                                                                   |                                                                                    | -----                   |           |           |
|    |                                                                                   | C                                                                                  | 0.423863                | -0.138292 | 0.436396  |
|    |                                                                                   | C                                                                                  | 1.876777                | 0.285608  | 0.715897  |
|    |                                                                                   | H                                                                                  | 2.308338                | 0.805924  | -0.145060 |
|    |                                                                                   | H                                                                                  | 1.941362                | 0.945008  | 1.585881  |
|    |                                                                                   | H                                                                                  | 2.487005                | -0.599875 | 0.921717  |
|    |                                                                                   | C                                                                                  | 0.375871                | -1.080594 | -0.779027 |
|    |                                                                                   | H                                                                                  | 0.943405                | -1.989724 | -0.560788 |
|    |                                                                                   | H                                                                                  | -0.654297               | -1.366625 | -1.013433 |
|    |                                                                                   | H                                                                                  | 0.821739                | -0.614103 | -1.665367 |
|    |                                                                                   | C                                                                                  | -0.193591               | -0.838298 | 1.656242  |
|    |                                                                                   | H                                                                                  | -0.194561               | -0.187842 | 2.532329  |
|    |                                                                                   | H                                                                                  | -1.224192               | -1.139336 | 1.443839  |
|    |                                                                                   | H                                                                                  | 0.386567                | -1.736357 | 1.891933  |
|    |                                                                                   | S                                                                                  | -0.444680               | 2.487092  | 0.862532  |
|    |                                                                                   | O                                                                                  | -0.451295               | 2.198681  | 2.295713  |
|    |                                                                                   | O                                                                                  | 0.513160                | 3.440161  | 0.306045  |
|    |                                                                                   | C                                                                                  | -3.089478               | 2.449436  | 0.944497  |
|    |                                                                                   | H                                                                                  | -3.077669               | 1.391609  | 0.662913  |
|    |                                                                                   | H                                                                                  | -3.064008               | 2.534829  | 2.034408  |
|    |                                                                                   | C                                                                                  | -4.281387               | 3.180724  | 0.347735  |
|    |                                                                                   | H                                                                                  | -4.212010               | 4.243488  | 0.603918  |
|    |                                                                                   | H                                                                                  | -4.244501               | 3.107973  | -0.744986 |
|    |                                                                                   | C                                                                                  | -5.616645               | 2.593606  | 0.863492  |
|    |                                                                                   | H                                                                                  | -5.600052               | 2.619055  | 1.967709  |
|    |                                                                                   | H                                                                                  | -5.669970               | 1.534257  | 0.581278  |
|    |                                                                                   | C                                                                                  | -6.834130               | 3.317982  | 0.354131  |
|    |                                                                                   | C                                                                                  | -7.176343               | 4.656565  | 0.935059  |
|    |                                                                                   | H                                                                                  | -7.794845               | 4.554828  | 1.846604  |
|    |                                                                                   | H                                                                                  | -6.285865               | 5.226147  | 1.223271  |
|    |                                                                                   | H                                                                                  | -7.756497               | 5.268542  | 0.233694  |
|    |                                                                                   | C                                                                                  | -7.903788               | 2.555987  | -0.365846 |
|    |                                                                                   | H                                                                                  | -8.520195               | 3.214289  | -0.990061 |

|    |                                                                                   |                                                                                    |                         |           |           |  |
|----|-----------------------------------------------------------------------------------|------------------------------------------------------------------------------------|-------------------------|-----------|-----------|--|
|    |                                                                                   | H                                                                                  | -7.486645               | 1.769922  | -1.006262 |  |
|    |                                                                                   | H                                                                                  | -8.596793               | 2.055251  | 0.336851  |  |
|    |                                                                                   | O                                                                                  | -1.884610               | 3.081708  | 0.405302  |  |
|    |                                                                                   | N                                                                                  | -0.450022               | 1.026325  | 0.031674  |  |
|    |                                                                                   | H                                                                                  | -0.328937               | 1.251252  | -0.955477 |  |
| 11 | 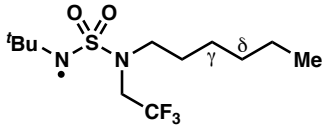 |  |                         |           |           |  |
|    |                                                                                   | Atom                                                                               | Coordinates (Angstroms) |           |           |  |
|    |                                                                                   |                                                                                    | X                       | Y         | Z         |  |
|    |                                                                                   | -----                                                                              |                         |           |           |  |
|    |                                                                                   | C                                                                                  | 0.380783                | -1.059623 | 0.000238  |  |
|    |                                                                                   | C                                                                                  | 0.204910                | 0.483845  | -0.029738 |  |
|    |                                                                                   | H                                                                                  | 1.102274                | 0.990615  | 0.329712  |  |
|    |                                                                                   | H                                                                                  | -0.020243               | 0.827857  | -1.043125 |  |
|    |                                                                                   | H                                                                                  | -0.636281               | 0.745901  | 0.620108  |  |
|    |                                                                                   | C                                                                                  | -0.909102               | -1.740945 | -0.493527 |  |
|    |                                                                                   | H                                                                                  | -1.149463               | -1.422170 | -1.511728 |  |
|    |                                                                                   | H                                                                                  | -0.797236               | -2.829274 | -0.489295 |  |
|    |                                                                                   | H                                                                                  | -1.744268               | -1.476141 | 0.162516  |  |
|    |                                                                                   | C                                                                                  | 0.722556                | -1.536063 | 1.429663  |  |
|    |                                                                                   | H                                                                                  | 0.901647                | -2.614608 | 1.447372  |  |
|    |                                                                                   | H                                                                                  | 1.600413                | -1.025486 | 1.831304  |  |
|    |                                                                                   | H                                                                                  | -0.128198               | -1.318059 | 2.082670  |  |
|    |                                                                                   | N                                                                                  | 1.405289                | -1.414975 | -0.996931 |  |
|    |                                                                                   | S                                                                                  | 3.039636                | -1.240737 | -0.647131 |  |
|    |                                                                                   | O                                                                                  | 3.462045                | -2.591121 | -0.233077 |  |
|    |                                                                                   | O                                                                                  | 3.404832                | -0.094482 | 0.194335  |  |
|    |                                                                                   | N                                                                                  | 3.593557                | -0.878214 | -2.190823 |  |
|    |                                                                                   | C                                                                                  | 4.686239                | 0.125673  | -2.313917 |  |
|    |                                                                                   | H                                                                                  | 5.308174                | 0.100210  | -1.414295 |  |
|    |                                                                                   | H                                                                                  | 5.309938                | -0.206309 | -3.149270 |  |
|    |                                                                                   | C                                                                                  | 4.178910                | 1.548007  | -2.563805 |  |
|    |                                                                                   | H                                                                                  | 3.542458                | 1.552234  | -3.456501 |  |
|    |                                                                                   | H                                                                                  | 3.552969                | 1.852907  | -1.717959 |  |
|    |                                                                                   | C                                                                                  | 5.333469                | 2.543194  | -2.741681 |  |
|    |                                                                                   | H                                                                                  | 5.973744                | 2.524016  | -1.848108 |  |
|    |                                                                                   | H                                                                                  | 5.966875                | 2.223236  | -3.581963 |  |
|    |                                                                                   | C                                                                                  | 4.856898                | 3.980654  | -2.989716 |  |
|    |                                                                                   | H                                                                                  | 4.214344                | 4.000635  | -3.881840 |  |
|    |                                                                                   | H                                                                                  | 4.224730                | 4.302155  | -2.149473 |  |

|    |  |      |                         |           |           |
|----|--|------|-------------------------|-----------|-----------|
|    |  | C    | 6.003676                | 4.983814  | -3.171064 |
|    |  | H    | 6.646041                | 4.962737  | -2.279797 |
|    |  | H    | 6.635253                | 4.662303  | -4.010877 |
|    |  | C    | 5.519667                | 6.417560  | -3.416903 |
|    |  | H    | 4.913924                | 6.779922  | -2.577721 |
|    |  | H    | 6.361162                | 7.107603  | -3.542376 |
|    |  | H    | 4.902108                | 6.477193  | -4.321095 |
|    |  | C    | 3.506667                | -1.953651 | -3.171665 |
|    |  | H    | 2.907484                | -2.774849 | -2.776855 |
|    |  | H    | 4.497435                | -2.351699 | -3.421094 |
|    |  | C    | 2.849315                | -1.517660 | -4.477715 |
|    |  | F    | 2.761311                | -2.583443 | -5.314706 |
|    |  | F    | 3.568549                | -0.565007 | -5.128102 |
|    |  | F    | 1.605099                | -1.027695 | -4.311188 |
| 12 |  |      |                         |           |           |
|    |  | Atom | Coordinates (Angstroms) |           |           |
|    |  |      | X                       | Y         | Z         |
|    |  |      | -----                   |           |           |
|    |  | C    | 1.766391                | 2.594000  | 2.628364  |
|    |  | C    | 0.503781                | 3.413013  | 2.302729  |
|    |  | H    | 1.484648                | 1.684544  | 3.165429  |
|    |  | H    | 2.360328                | 3.197014  | 3.332438  |
|    |  | H    | -0.138939               | 3.454628  | 3.187985  |
|    |  | H    | 0.783234                | 4.440536  | 2.056857  |
|    |  | S    | -0.570296               | 1.299939  | 0.918501  |
|    |  | O    | -1.682676               | 1.172459  | -0.030691 |
|    |  | O    | -0.698649               | 0.701465  | 2.256368  |
|    |  | N    | 0.835130                | 0.821779  | 0.094429  |
|    |  | C    | 1.188031                | -0.635769 | 0.009602  |
|    |  | C    | 2.368141                | -0.695691 | -0.976559 |
|    |  | H    | 3.234273                | -0.146520 | -0.594784 |
|    |  | H    | 2.671332                | -1.736689 | -1.127459 |
|    |  | H    | 2.086843                | -0.269885 | -1.944045 |
|    |  | C    | 1.602302                | -1.253994 | 1.361068  |
|    |  | H    | 0.788481                | -1.213112 | 2.086790  |
|    |  | H    | 1.882227                | -2.301622 | 1.208310  |
|    |  | H    | 2.469844                | -0.735708 | 1.781648  |

|    |  |  |   |                              |           |           |
|----|--|--|---|------------------------------|-----------|-----------|
|    |  |  | C | -0.005750                    | -1.417620 | -0.580616 |
|    |  |  | H | -0.346489                    | -0.967636 | -1.516271 |
|    |  |  | H | 0.316248                     | -2.444690 | -0.780995 |
|    |  |  | H | -0.850642                    | -1.457122 | 0.111049  |
|    |  |  | C | 4.072646                     | 2.910359  | -0.582143 |
|    |  |  | H | 4.906137                     | 2.341978  | -0.147458 |
|    |  |  | H | 3.543059                     | 2.222773  | -1.252237 |
|    |  |  | C | 2.623117                     | 2.227065  | 1.428974  |
|    |  |  | H | 1.812929                     | 1.490076  | 0.689412  |
|    |  |  | H | 3.410289                     | 1.513325  | 1.694092  |
|    |  |  | C | 3.125504                     | 3.351627  | 0.542094  |
|    |  |  | H | 3.650848                     | 4.076755  | 1.188454  |
|    |  |  | H | 2.280432                     | 3.901772  | 0.108282  |
|    |  |  | C | 4.624763                     | 4.088800  | -1.391924 |
|    |  |  | H | 5.189786                     | 4.779090  | -0.754397 |
|    |  |  | H | 5.295263                     | 3.744008  | -2.185942 |
|    |  |  | H | 3.815968                     | 4.658640  | -1.864354 |
|    |  |  | N | -0.268203                    | 2.931969  | 1.131957  |
|    |  |  | C | -0.780440                    | 3.878005  | 0.159461  |
|    |  |  | H | -0.005828                    | 4.599506  | -0.123647 |
|    |  |  | H | -1.104763                    | 3.348483  | -0.737098 |
|    |  |  | C | -1.980369                    | 4.685539  | 0.656721  |
|    |  |  | F | -3.018771                    | 3.915812  | 1.033709  |
|    |  |  | F | -1.664406                    | 5.474527  | 1.720041  |
|    |  |  | F | -2.415721                    | 5.512149  | -0.329689 |
| 13 |  |  |   |                              |           |           |
|    |  |  |   | Atom Coordinates (Angstroms) |           |           |
|    |  |  |   | X                            | Y         | Z         |
|    |  |  |   | -----                        |           |           |
|    |  |  | C | 0.481685                     | 4.661034  | 0.456634  |
|    |  |  | C | 1.896941                     | 4.374843  | -0.033620 |
|    |  |  | H | 0.479558                     | 4.599069  | 1.552314  |
|    |  |  | H | 2.624463                     | 4.990870  | 0.508494  |
|    |  |  | H | 0.248358                     | 5.711488  | 0.221076  |
|    |  |  | C | -0.592677                    | 2.290551  | 0.253423  |
|    |  |  | H | -0.375740                    | 2.155534  | 1.314763  |
|    |  |  | H | -1.561398                    | 1.819248  | 0.064512  |
|    |  |  | C | -0.661290                    | 3.786870  | -0.091930 |

|    |                                                                                     |                                                                                      |           |           |
|----|-------------------------------------------------------------------------------------|--------------------------------------------------------------------------------------|-----------|-----------|
|    | H                                                                                   | -0.752818                                                                            | 3.912911  | -1.178240 |
|    | H                                                                                   | -1.602112                                                                            | 4.166590  | 0.325917  |
|    | C                                                                                   | 3.600460                                                                             | 2.027611  | 1.875363  |
|    | C                                                                                   | 3.590462                                                                             | 3.146642  | 2.933056  |
|    | H                                                                                   | 4.551131                                                                             | 3.167903  | 3.457621  |
|    | H                                                                                   | 3.436161                                                                             | 4.129453  | 2.478410  |
|    | H                                                                                   | 2.796649                                                                             | 2.976309  | 3.666008  |
|    | C                                                                                   | 4.740504                                                                             | 2.257649  | 0.861464  |
|    | H                                                                                   | 5.704818                                                                             | 2.229942  | 1.379762  |
|    | H                                                                                   | 4.739651                                                                             | 1.488335  | 0.086235  |
|    | H                                                                                   | 4.646397                                                                             | 3.236434  | 0.380412  |
|    | C                                                                                   | 3.801880                                                                             | 0.671999  | 2.586765  |
|    | H                                                                                   | 4.733134                                                                             | 0.722923  | 3.160181  |
|    | H                                                                                   | 2.978345                                                                             | 0.457619  | 3.271361  |
|    | H                                                                                   | 3.886090                                                                             | -0.155381 | 1.878603  |
|    | N                                                                                   | 2.247820                                                                             | 2.091135  | 1.226058  |
|    | H                                                                                   | 2.150193                                                                             | 3.209276  | 0.491954  |
|    | C                                                                                   | 2.193951                                                                             | 4.357982  | -1.522926 |
|    | H                                                                                   | 3.194692                                                                             | 3.939912  | -1.684105 |
|    | H                                                                                   | 1.497260                                                                             | 3.698108  | -2.047902 |
|    | C                                                                                   | 2.137097                                                                             | 5.764075  | -2.155247 |
|    | H                                                                                   | 2.397755                                                                             | 5.714511  | -3.217727 |
|    | H                                                                                   | 1.136900                                                                             | 6.202751  | -2.076146 |
|    | H                                                                                   | 2.842830                                                                             | 6.445730  | -1.667535 |
|    | S                                                                                   | 1.713690                                                                             | 0.802447  | 0.288775  |
|    | O                                                                                   | 1.212559                                                                             | -0.209337 | 1.231866  |
|    | O                                                                                   | 2.641443                                                                             | 0.353675  | -0.765854 |
|    | N                                                                                   | 0.449447                                                                             | 1.571956  | -0.516350 |
|    | C                                                                                   | -0.705002                                                                            | 0.007081  | -2.133050 |
|    | C                                                                                   | 0.203394                                                                             | 1.217385  | -1.900932 |
|    | H                                                                                   | 1.149946                                                                             | 1.002981  | -2.399850 |
|    | H                                                                                   | -0.269047                                                                            | 2.062895  | -2.409971 |
|    | F                                                                                   | -0.231017                                                                            | -1.124600 | -1.576739 |
|    | F                                                                                   | -1.962844                                                                            | 0.192306  | -1.648902 |
|    | F                                                                                   | -0.828816                                                                            | -0.213474 | -3.469156 |
| 14 | 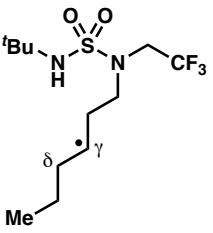 |  |           |           |
|    | Atom                                                                                | Coordinates (Angstroms)                                                              |           |           |
|    |                                                                                     | X                                                                                    | Y         | Z         |

*Supporting Information for Sulfamides Direct Radical-Mediated Chlorination*

-----

|   |            |           |           |
|---|------------|-----------|-----------|
| C | -0.176569  | -0.929341 | -0.000033 |
| C | -0.191111  | -2.206242 | 0.859046  |
| H | 0.221031   | -2.022805 | 1.854793  |
| H | -1.208213  | -2.594781 | 0.972426  |
| H | 0.419073   | -2.979444 | 0.380699  |
| C | 1.247351   | -0.368894 | -0.133655 |
| H | 1.889093   | -1.114613 | -0.614220 |
| H | 1.246453   | 0.533716  | -0.753130 |
| H | 1.672074   | -0.123253 | 0.840841  |
| C | -0.743482  | -1.232627 | -1.398524 |
| H | -1.756323  | -1.648754 | -1.338522 |
| H | -0.770804  | -0.328844 | -2.015588 |
| H | -0.110608  | -1.970669 | -1.899684 |
| S | -1.134836  | 0.553516  | 2.188213  |
| O | -2.105001  | -0.269132 | 2.920966  |
| O | 0.257365   | 0.633079  | 2.629349  |
| N | -1.775278  | 2.104914  | 2.180526  |
| C | -3.233992  | 2.299799  | 2.339044  |
| H | -3.567946  | 1.647905  | 3.146420  |
| H | -3.362215  | 3.329558  | 2.682488  |
| C | -4.075693  | 2.058566  | 1.072898  |
| H | -3.605704  | 2.582481  | 0.218928  |
| H | -4.059827  | 0.990415  | 0.814458  |
| N | -1.089337  | 0.148551  | 0.541361  |
| H | -2.052588  | -0.029907 | 0.258895  |
| C | -5.492373  | 2.507707  | 1.240690  |
| H | -5.676528  | 3.420014  | 1.807925  |
| C | -6.603035  | 1.943925  | 0.415259  |
| H | -6.514254  | 0.846290  | 0.377326  |
| H | -6.494651  | 2.271701  | -0.637521 |
| C | -8.008023  | 2.329803  | 0.904441  |
| H | -8.087354  | 3.424821  | 0.935452  |
| H | -8.134156  | 1.982066  | 1.937845  |
| C | -9.127569  | 1.759375  | 0.027607  |
| H | -9.092236  | 0.663688  | 0.002735  |
| H | -10.114113 | 2.051427  | 0.402815  |
| H | -9.044372  | 2.117724  | -1.005481 |
| C | -0.999344  | 3.133699  | 1.505097  |
| H | -0.119083  | 2.700248  | 1.027317  |
| H | -1.589712  | 3.627821  | 0.725879  |
| C | -0.501064  | 4.221261  | 2.454685  |
| F | 0.285600   | 3.749451  | 3.438650  |
| F | 0.221071   | 5.136319  | 1.754146  |
| F | -1.521453  | 4.897060  | 3.047865  |



| 15                                                                                                                                                                                                                                                                                                                                                                                                                                                                                                                                                                                                                                                                                                                                                                                                                                                                                                                                                                                                                                                                                                                                                                                                                                                                                                                                                                                                                                                                                                                                                                                                                                                                                                                                                                                                                                                                                                                                                                                                                                                                                                                                                                                                                                                                                                                                                                                                                                                                                                                                                                                                                                                                                                                                                                                                      | 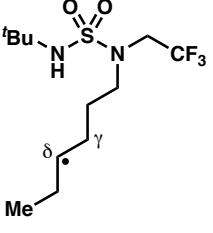 |  |           |                         |  |  |   |   |   |       |  |  |  |   |          |           |           |   |          |           |           |   |          |           |          |   |          |           |           |   |          |           |           |   |          |           |           |   |          |           |           |   |          |           |           |   |          |           |          |   |          |           |           |   |          |           |           |   |          |           |           |   |          |           |           |   |          |           |          |   |           |           |          |   |          |           |          |   |           |           |          |   |           |           |          |   |           |          |          |   |           |           |          |   |           |          |           |   |           |           |          |   |          |           |           |   |           |           |           |   |           |           |          |   |          |          |          |   |          |          |          |   |           |          |          |   |          |          |          |   |           |           |           |   |           |           |           |   |           |          |           |   |           |          |          |   |           |           |          |
|---------------------------------------------------------------------------------------------------------------------------------------------------------------------------------------------------------------------------------------------------------------------------------------------------------------------------------------------------------------------------------------------------------------------------------------------------------------------------------------------------------------------------------------------------------------------------------------------------------------------------------------------------------------------------------------------------------------------------------------------------------------------------------------------------------------------------------------------------------------------------------------------------------------------------------------------------------------------------------------------------------------------------------------------------------------------------------------------------------------------------------------------------------------------------------------------------------------------------------------------------------------------------------------------------------------------------------------------------------------------------------------------------------------------------------------------------------------------------------------------------------------------------------------------------------------------------------------------------------------------------------------------------------------------------------------------------------------------------------------------------------------------------------------------------------------------------------------------------------------------------------------------------------------------------------------------------------------------------------------------------------------------------------------------------------------------------------------------------------------------------------------------------------------------------------------------------------------------------------------------------------------------------------------------------------------------------------------------------------------------------------------------------------------------------------------------------------------------------------------------------------------------------------------------------------------------------------------------------------------------------------------------------------------------------------------------------------------------------------------------------------------------------------------------------------|-----------------------------------------------------------------------------------|------------------------------------------------------------------------------------|-----------|-------------------------|--|--|---|---|---|-------|--|--|--|---|----------|-----------|-----------|---|----------|-----------|-----------|---|----------|-----------|----------|---|----------|-----------|-----------|---|----------|-----------|-----------|---|----------|-----------|-----------|---|----------|-----------|-----------|---|----------|-----------|-----------|---|----------|-----------|----------|---|----------|-----------|-----------|---|----------|-----------|-----------|---|----------|-----------|-----------|---|----------|-----------|-----------|---|----------|-----------|----------|---|-----------|-----------|----------|---|----------|-----------|----------|---|-----------|-----------|----------|---|-----------|-----------|----------|---|-----------|----------|----------|---|-----------|-----------|----------|---|-----------|----------|-----------|---|-----------|-----------|----------|---|----------|-----------|-----------|---|-----------|-----------|-----------|---|-----------|-----------|----------|---|----------|----------|----------|---|----------|----------|----------|---|-----------|----------|----------|---|----------|----------|----------|---|-----------|-----------|-----------|---|-----------|-----------|-----------|---|-----------|----------|-----------|---|-----------|----------|----------|---|-----------|-----------|----------|
| <table border="1"> <thead> <tr> <th rowspan="2">Atom</th> <th colspan="3">Coordinates (Angstroms)</th> </tr> <tr> <th>X</th> <th>Y</th> <th>Z</th> </tr> </thead> <tbody> <tr><td colspan="4">-----</td></tr> <tr><td>C</td><td>1.643351</td><td>-2.590077</td><td>-0.825143</td></tr> <tr><td>C</td><td>1.642303</td><td>-4.031383</td><td>-0.285351</td></tr> <tr><td>H</td><td>1.976653</td><td>-4.069251</td><td>0.754830</td></tr> <tr><td>H</td><td>0.642836</td><td>-4.474278</td><td>-0.342685</td></tr> <tr><td>H</td><td>2.324561</td><td>-4.648121</td><td>-0.879630</td></tr> <tr><td>C</td><td>3.040793</td><td>-1.961237</td><td>-0.718071</td></tr> <tr><td>H</td><td>3.749837</td><td>-2.547257</td><td>-1.311938</td></tr> <tr><td>H</td><td>3.030799</td><td>-0.937897</td><td>-1.106728</td></tr> <tr><td>H</td><td>3.390114</td><td>-1.938396</td><td>0.315216</td></tr> <tr><td>C</td><td>1.187147</td><td>-2.580669</td><td>-2.295119</td></tr> <tr><td>H</td><td>0.195484</td><td>-3.034341</td><td>-2.410035</td></tr> <tr><td>H</td><td>1.154078</td><td>-1.560064</td><td>-2.689467</td></tr> <tr><td>H</td><td>1.889497</td><td>-3.159909</td><td>-2.901407</td></tr> <tr><td>S</td><td>0.471810</td><td>-1.688086</td><td>1.565381</td></tr> <tr><td>O</td><td>-0.470473</td><td>-2.714005</td><td>2.029604</td></tr> <tr><td>O</td><td>1.827747</td><td>-1.626046</td><td>2.110073</td></tr> <tr><td>C</td><td>-1.760940</td><td>-0.162624</td><td>1.975857</td></tr> <tr><td>H</td><td>-2.066329</td><td>-0.995128</td><td>2.611569</td></tr> <tr><td>H</td><td>-1.978193</td><td>0.756606</td><td>2.526687</td></tr> <tr><td>C</td><td>-2.535657</td><td>-0.183703</td><td>0.652283</td></tr> <tr><td>H</td><td>-2.147208</td><td>0.583212</td><td>-0.029791</td></tr> <tr><td>H</td><td>-2.395528</td><td>-1.154491</td><td>0.159264</td></tr> <tr><td>N</td><td>0.639360</td><td>-1.704129</td><td>-0.122145</td></tr> <tr><td>H</td><td>-0.293467</td><td>-1.851989</td><td>-0.506104</td></tr> <tr><td>N</td><td>-0.285932</td><td>-0.219127</td><td>1.852925</td></tr> <tr><td>C</td><td>0.434371</td><td>0.982983</td><td>1.462004</td></tr> <tr><td>H</td><td>1.361264</td><td>0.725049</td><td>0.946833</td></tr> <tr><td>H</td><td>-0.162467</td><td>1.598213</td><td>0.779999</td></tr> <tr><td>C</td><td>0.814669</td><td>1.862830</td><td>2.651264</td></tr> <tr><td>C</td><td>-4.849466</td><td>-0.026925</td><td>-0.387081</td></tr> <tr><td>H</td><td>-4.506106</td><td>-0.689127</td><td>-1.182267</td></tr> <tr><td>C</td><td>-6.257701</td><td>0.472241</td><td>-0.440566</td></tr> <tr><td>H</td><td>-6.316343</td><td>1.460696</td><td>0.040534</td></tr> <tr><td>H</td><td>-6.908220</td><td>-0.178434</td><td>0.174928</td></tr> </tbody> </table> |                                                                                   |                                                                                    | Atom      | Coordinates (Angstroms) |  |  | X | Y | Z | ----- |  |  |  | C | 1.643351 | -2.590077 | -0.825143 | C | 1.642303 | -4.031383 | -0.285351 | H | 1.976653 | -4.069251 | 0.754830 | H | 0.642836 | -4.474278 | -0.342685 | H | 2.324561 | -4.648121 | -0.879630 | C | 3.040793 | -1.961237 | -0.718071 | H | 3.749837 | -2.547257 | -1.311938 | H | 3.030799 | -0.937897 | -1.106728 | H | 3.390114 | -1.938396 | 0.315216 | C | 1.187147 | -2.580669 | -2.295119 | H | 0.195484 | -3.034341 | -2.410035 | H | 1.154078 | -1.560064 | -2.689467 | H | 1.889497 | -3.159909 | -2.901407 | S | 0.471810 | -1.688086 | 1.565381 | O | -0.470473 | -2.714005 | 2.029604 | O | 1.827747 | -1.626046 | 2.110073 | C | -1.760940 | -0.162624 | 1.975857 | H | -2.066329 | -0.995128 | 2.611569 | H | -1.978193 | 0.756606 | 2.526687 | C | -2.535657 | -0.183703 | 0.652283 | H | -2.147208 | 0.583212 | -0.029791 | H | -2.395528 | -1.154491 | 0.159264 | N | 0.639360 | -1.704129 | -0.122145 | H | -0.293467 | -1.851989 | -0.506104 | N | -0.285932 | -0.219127 | 1.852925 | C | 0.434371 | 0.982983 | 1.462004 | H | 1.361264 | 0.725049 | 0.946833 | H | -0.162467 | 1.598213 | 0.779999 | C | 0.814669 | 1.862830 | 2.651264 | C | -4.849466 | -0.026925 | -0.387081 | H | -4.506106 | -0.689127 | -1.182267 | C | -6.257701 | 0.472241 | -0.440566 | H | -6.316343 | 1.460696 | 0.040534 | H | -6.908220 | -0.178434 | 0.174928 |
| Atom                                                                                                                                                                                                                                                                                                                                                                                                                                                                                                                                                                                                                                                                                                                                                                                                                                                                                                                                                                                                                                                                                                                                                                                                                                                                                                                                                                                                                                                                                                                                                                                                                                                                                                                                                                                                                                                                                                                                                                                                                                                                                                                                                                                                                                                                                                                                                                                                                                                                                                                                                                                                                                                                                                                                                                                                    | Coordinates (Angstroms)                                                           |                                                                                    |           |                         |  |  |   |   |   |       |  |  |  |   |          |           |           |   |          |           |           |   |          |           |          |   |          |           |           |   |          |           |           |   |          |           |           |   |          |           |           |   |          |           |           |   |          |           |          |   |          |           |           |   |          |           |           |   |          |           |           |   |          |           |           |   |          |           |          |   |           |           |          |   |          |           |          |   |           |           |          |   |           |           |          |   |           |          |          |   |           |           |          |   |           |          |           |   |           |           |          |   |          |           |           |   |           |           |           |   |           |           |          |   |          |          |          |   |          |          |          |   |           |          |          |   |          |          |          |   |           |           |           |   |           |           |           |   |           |          |           |   |           |          |          |   |           |           |          |
|                                                                                                                                                                                                                                                                                                                                                                                                                                                                                                                                                                                                                                                                                                                                                                                                                                                                                                                                                                                                                                                                                                                                                                                                                                                                                                                                                                                                                                                                                                                                                                                                                                                                                                                                                                                                                                                                                                                                                                                                                                                                                                                                                                                                                                                                                                                                                                                                                                                                                                                                                                                                                                                                                                                                                                                                         | X                                                                                 | Y                                                                                  | Z         |                         |  |  |   |   |   |       |  |  |  |   |          |           |           |   |          |           |           |   |          |           |          |   |          |           |           |   |          |           |           |   |          |           |           |   |          |           |           |   |          |           |           |   |          |           |          |   |          |           |           |   |          |           |           |   |          |           |           |   |          |           |           |   |          |           |          |   |           |           |          |   |          |           |          |   |           |           |          |   |           |           |          |   |           |          |          |   |           |           |          |   |           |          |           |   |           |           |          |   |          |           |           |   |           |           |           |   |           |           |          |   |          |          |          |   |          |          |          |   |           |          |          |   |          |          |          |   |           |           |           |   |           |           |           |   |           |          |           |   |           |          |          |   |           |           |          |
| -----                                                                                                                                                                                                                                                                                                                                                                                                                                                                                                                                                                                                                                                                                                                                                                                                                                                                                                                                                                                                                                                                                                                                                                                                                                                                                                                                                                                                                                                                                                                                                                                                                                                                                                                                                                                                                                                                                                                                                                                                                                                                                                                                                                                                                                                                                                                                                                                                                                                                                                                                                                                                                                                                                                                                                                                                   |                                                                                   |                                                                                    |           |                         |  |  |   |   |   |       |  |  |  |   |          |           |           |   |          |           |           |   |          |           |          |   |          |           |           |   |          |           |           |   |          |           |           |   |          |           |           |   |          |           |           |   |          |           |          |   |          |           |           |   |          |           |           |   |          |           |           |   |          |           |           |   |          |           |          |   |           |           |          |   |          |           |          |   |           |           |          |   |           |           |          |   |           |          |          |   |           |           |          |   |           |          |           |   |           |           |          |   |          |           |           |   |           |           |           |   |           |           |          |   |          |          |          |   |          |          |          |   |           |          |          |   |          |          |          |   |           |           |           |   |           |           |           |   |           |          |           |   |           |          |          |   |           |           |          |
| C                                                                                                                                                                                                                                                                                                                                                                                                                                                                                                                                                                                                                                                                                                                                                                                                                                                                                                                                                                                                                                                                                                                                                                                                                                                                                                                                                                                                                                                                                                                                                                                                                                                                                                                                                                                                                                                                                                                                                                                                                                                                                                                                                                                                                                                                                                                                                                                                                                                                                                                                                                                                                                                                                                                                                                                                       | 1.643351                                                                          | -2.590077                                                                          | -0.825143 |                         |  |  |   |   |   |       |  |  |  |   |          |           |           |   |          |           |           |   |          |           |          |   |          |           |           |   |          |           |           |   |          |           |           |   |          |           |           |   |          |           |           |   |          |           |          |   |          |           |           |   |          |           |           |   |          |           |           |   |          |           |           |   |          |           |          |   |           |           |          |   |          |           |          |   |           |           |          |   |           |           |          |   |           |          |          |   |           |           |          |   |           |          |           |   |           |           |          |   |          |           |           |   |           |           |           |   |           |           |          |   |          |          |          |   |          |          |          |   |           |          |          |   |          |          |          |   |           |           |           |   |           |           |           |   |           |          |           |   |           |          |          |   |           |           |          |
| C                                                                                                                                                                                                                                                                                                                                                                                                                                                                                                                                                                                                                                                                                                                                                                                                                                                                                                                                                                                                                                                                                                                                                                                                                                                                                                                                                                                                                                                                                                                                                                                                                                                                                                                                                                                                                                                                                                                                                                                                                                                                                                                                                                                                                                                                                                                                                                                                                                                                                                                                                                                                                                                                                                                                                                                                       | 1.642303                                                                          | -4.031383                                                                          | -0.285351 |                         |  |  |   |   |   |       |  |  |  |   |          |           |           |   |          |           |           |   |          |           |          |   |          |           |           |   |          |           |           |   |          |           |           |   |          |           |           |   |          |           |           |   |          |           |          |   |          |           |           |   |          |           |           |   |          |           |           |   |          |           |           |   |          |           |          |   |           |           |          |   |          |           |          |   |           |           |          |   |           |           |          |   |           |          |          |   |           |           |          |   |           |          |           |   |           |           |          |   |          |           |           |   |           |           |           |   |           |           |          |   |          |          |          |   |          |          |          |   |           |          |          |   |          |          |          |   |           |           |           |   |           |           |           |   |           |          |           |   |           |          |          |   |           |           |          |
| H                                                                                                                                                                                                                                                                                                                                                                                                                                                                                                                                                                                                                                                                                                                                                                                                                                                                                                                                                                                                                                                                                                                                                                                                                                                                                                                                                                                                                                                                                                                                                                                                                                                                                                                                                                                                                                                                                                                                                                                                                                                                                                                                                                                                                                                                                                                                                                                                                                                                                                                                                                                                                                                                                                                                                                                                       | 1.976653                                                                          | -4.069251                                                                          | 0.754830  |                         |  |  |   |   |   |       |  |  |  |   |          |           |           |   |          |           |           |   |          |           |          |   |          |           |           |   |          |           |           |   |          |           |           |   |          |           |           |   |          |           |           |   |          |           |          |   |          |           |           |   |          |           |           |   |          |           |           |   |          |           |           |   |          |           |          |   |           |           |          |   |          |           |          |   |           |           |          |   |           |           |          |   |           |          |          |   |           |           |          |   |           |          |           |   |           |           |          |   |          |           |           |   |           |           |           |   |           |           |          |   |          |          |          |   |          |          |          |   |           |          |          |   |          |          |          |   |           |           |           |   |           |           |           |   |           |          |           |   |           |          |          |   |           |           |          |
| H                                                                                                                                                                                                                                                                                                                                                                                                                                                                                                                                                                                                                                                                                                                                                                                                                                                                                                                                                                                                                                                                                                                                                                                                                                                                                                                                                                                                                                                                                                                                                                                                                                                                                                                                                                                                                                                                                                                                                                                                                                                                                                                                                                                                                                                                                                                                                                                                                                                                                                                                                                                                                                                                                                                                                                                                       | 0.642836                                                                          | -4.474278                                                                          | -0.342685 |                         |  |  |   |   |   |       |  |  |  |   |          |           |           |   |          |           |           |   |          |           |          |   |          |           |           |   |          |           |           |   |          |           |           |   |          |           |           |   |          |           |           |   |          |           |          |   |          |           |           |   |          |           |           |   |          |           |           |   |          |           |           |   |          |           |          |   |           |           |          |   |          |           |          |   |           |           |          |   |           |           |          |   |           |          |          |   |           |           |          |   |           |          |           |   |           |           |          |   |          |           |           |   |           |           |           |   |           |           |          |   |          |          |          |   |          |          |          |   |           |          |          |   |          |          |          |   |           |           |           |   |           |           |           |   |           |          |           |   |           |          |          |   |           |           |          |
| H                                                                                                                                                                                                                                                                                                                                                                                                                                                                                                                                                                                                                                                                                                                                                                                                                                                                                                                                                                                                                                                                                                                                                                                                                                                                                                                                                                                                                                                                                                                                                                                                                                                                                                                                                                                                                                                                                                                                                                                                                                                                                                                                                                                                                                                                                                                                                                                                                                                                                                                                                                                                                                                                                                                                                                                                       | 2.324561                                                                          | -4.648121                                                                          | -0.879630 |                         |  |  |   |   |   |       |  |  |  |   |          |           |           |   |          |           |           |   |          |           |          |   |          |           |           |   |          |           |           |   |          |           |           |   |          |           |           |   |          |           |           |   |          |           |          |   |          |           |           |   |          |           |           |   |          |           |           |   |          |           |           |   |          |           |          |   |           |           |          |   |          |           |          |   |           |           |          |   |           |           |          |   |           |          |          |   |           |           |          |   |           |          |           |   |           |           |          |   |          |           |           |   |           |           |           |   |           |           |          |   |          |          |          |   |          |          |          |   |           |          |          |   |          |          |          |   |           |           |           |   |           |           |           |   |           |          |           |   |           |          |          |   |           |           |          |
| C                                                                                                                                                                                                                                                                                                                                                                                                                                                                                                                                                                                                                                                                                                                                                                                                                                                                                                                                                                                                                                                                                                                                                                                                                                                                                                                                                                                                                                                                                                                                                                                                                                                                                                                                                                                                                                                                                                                                                                                                                                                                                                                                                                                                                                                                                                                                                                                                                                                                                                                                                                                                                                                                                                                                                                                                       | 3.040793                                                                          | -1.961237                                                                          | -0.718071 |                         |  |  |   |   |   |       |  |  |  |   |          |           |           |   |          |           |           |   |          |           |          |   |          |           |           |   |          |           |           |   |          |           |           |   |          |           |           |   |          |           |           |   |          |           |          |   |          |           |           |   |          |           |           |   |          |           |           |   |          |           |           |   |          |           |          |   |           |           |          |   |          |           |          |   |           |           |          |   |           |           |          |   |           |          |          |   |           |           |          |   |           |          |           |   |           |           |          |   |          |           |           |   |           |           |           |   |           |           |          |   |          |          |          |   |          |          |          |   |           |          |          |   |          |          |          |   |           |           |           |   |           |           |           |   |           |          |           |   |           |          |          |   |           |           |          |
| H                                                                                                                                                                                                                                                                                                                                                                                                                                                                                                                                                                                                                                                                                                                                                                                                                                                                                                                                                                                                                                                                                                                                                                                                                                                                                                                                                                                                                                                                                                                                                                                                                                                                                                                                                                                                                                                                                                                                                                                                                                                                                                                                                                                                                                                                                                                                                                                                                                                                                                                                                                                                                                                                                                                                                                                                       | 3.749837                                                                          | -2.547257                                                                          | -1.311938 |                         |  |  |   |   |   |       |  |  |  |   |          |           |           |   |          |           |           |   |          |           |          |   |          |           |           |   |          |           |           |   |          |           |           |   |          |           |           |   |          |           |           |   |          |           |          |   |          |           |           |   |          |           |           |   |          |           |           |   |          |           |           |   |          |           |          |   |           |           |          |   |          |           |          |   |           |           |          |   |           |           |          |   |           |          |          |   |           |           |          |   |           |          |           |   |           |           |          |   |          |           |           |   |           |           |           |   |           |           |          |   |          |          |          |   |          |          |          |   |           |          |          |   |          |          |          |   |           |           |           |   |           |           |           |   |           |          |           |   |           |          |          |   |           |           |          |
| H                                                                                                                                                                                                                                                                                                                                                                                                                                                                                                                                                                                                                                                                                                                                                                                                                                                                                                                                                                                                                                                                                                                                                                                                                                                                                                                                                                                                                                                                                                                                                                                                                                                                                                                                                                                                                                                                                                                                                                                                                                                                                                                                                                                                                                                                                                                                                                                                                                                                                                                                                                                                                                                                                                                                                                                                       | 3.030799                                                                          | -0.937897                                                                          | -1.106728 |                         |  |  |   |   |   |       |  |  |  |   |          |           |           |   |          |           |           |   |          |           |          |   |          |           |           |   |          |           |           |   |          |           |           |   |          |           |           |   |          |           |           |   |          |           |          |   |          |           |           |   |          |           |           |   |          |           |           |   |          |           |           |   |          |           |          |   |           |           |          |   |          |           |          |   |           |           |          |   |           |           |          |   |           |          |          |   |           |           |          |   |           |          |           |   |           |           |          |   |          |           |           |   |           |           |           |   |           |           |          |   |          |          |          |   |          |          |          |   |           |          |          |   |          |          |          |   |           |           |           |   |           |           |           |   |           |          |           |   |           |          |          |   |           |           |          |
| H                                                                                                                                                                                                                                                                                                                                                                                                                                                                                                                                                                                                                                                                                                                                                                                                                                                                                                                                                                                                                                                                                                                                                                                                                                                                                                                                                                                                                                                                                                                                                                                                                                                                                                                                                                                                                                                                                                                                                                                                                                                                                                                                                                                                                                                                                                                                                                                                                                                                                                                                                                                                                                                                                                                                                                                                       | 3.390114                                                                          | -1.938396                                                                          | 0.315216  |                         |  |  |   |   |   |       |  |  |  |   |          |           |           |   |          |           |           |   |          |           |          |   |          |           |           |   |          |           |           |   |          |           |           |   |          |           |           |   |          |           |           |   |          |           |          |   |          |           |           |   |          |           |           |   |          |           |           |   |          |           |           |   |          |           |          |   |           |           |          |   |          |           |          |   |           |           |          |   |           |           |          |   |           |          |          |   |           |           |          |   |           |          |           |   |           |           |          |   |          |           |           |   |           |           |           |   |           |           |          |   |          |          |          |   |          |          |          |   |           |          |          |   |          |          |          |   |           |           |           |   |           |           |           |   |           |          |           |   |           |          |          |   |           |           |          |
| C                                                                                                                                                                                                                                                                                                                                                                                                                                                                                                                                                                                                                                                                                                                                                                                                                                                                                                                                                                                                                                                                                                                                                                                                                                                                                                                                                                                                                                                                                                                                                                                                                                                                                                                                                                                                                                                                                                                                                                                                                                                                                                                                                                                                                                                                                                                                                                                                                                                                                                                                                                                                                                                                                                                                                                                                       | 1.187147                                                                          | -2.580669                                                                          | -2.295119 |                         |  |  |   |   |   |       |  |  |  |   |          |           |           |   |          |           |           |   |          |           |          |   |          |           |           |   |          |           |           |   |          |           |           |   |          |           |           |   |          |           |           |   |          |           |          |   |          |           |           |   |          |           |           |   |          |           |           |   |          |           |           |   |          |           |          |   |           |           |          |   |          |           |          |   |           |           |          |   |           |           |          |   |           |          |          |   |           |           |          |   |           |          |           |   |           |           |          |   |          |           |           |   |           |           |           |   |           |           |          |   |          |          |          |   |          |          |          |   |           |          |          |   |          |          |          |   |           |           |           |   |           |           |           |   |           |          |           |   |           |          |          |   |           |           |          |
| H                                                                                                                                                                                                                                                                                                                                                                                                                                                                                                                                                                                                                                                                                                                                                                                                                                                                                                                                                                                                                                                                                                                                                                                                                                                                                                                                                                                                                                                                                                                                                                                                                                                                                                                                                                                                                                                                                                                                                                                                                                                                                                                                                                                                                                                                                                                                                                                                                                                                                                                                                                                                                                                                                                                                                                                                       | 0.195484                                                                          | -3.034341                                                                          | -2.410035 |                         |  |  |   |   |   |       |  |  |  |   |          |           |           |   |          |           |           |   |          |           |          |   |          |           |           |   |          |           |           |   |          |           |           |   |          |           |           |   |          |           |           |   |          |           |          |   |          |           |           |   |          |           |           |   |          |           |           |   |          |           |           |   |          |           |          |   |           |           |          |   |          |           |          |   |           |           |          |   |           |           |          |   |           |          |          |   |           |           |          |   |           |          |           |   |           |           |          |   |          |           |           |   |           |           |           |   |           |           |          |   |          |          |          |   |          |          |          |   |           |          |          |   |          |          |          |   |           |           |           |   |           |           |           |   |           |          |           |   |           |          |          |   |           |           |          |
| H                                                                                                                                                                                                                                                                                                                                                                                                                                                                                                                                                                                                                                                                                                                                                                                                                                                                                                                                                                                                                                                                                                                                                                                                                                                                                                                                                                                                                                                                                                                                                                                                                                                                                                                                                                                                                                                                                                                                                                                                                                                                                                                                                                                                                                                                                                                                                                                                                                                                                                                                                                                                                                                                                                                                                                                                       | 1.154078                                                                          | -1.560064                                                                          | -2.689467 |                         |  |  |   |   |   |       |  |  |  |   |          |           |           |   |          |           |           |   |          |           |          |   |          |           |           |   |          |           |           |   |          |           |           |   |          |           |           |   |          |           |           |   |          |           |          |   |          |           |           |   |          |           |           |   |          |           |           |   |          |           |           |   |          |           |          |   |           |           |          |   |          |           |          |   |           |           |          |   |           |           |          |   |           |          |          |   |           |           |          |   |           |          |           |   |           |           |          |   |          |           |           |   |           |           |           |   |           |           |          |   |          |          |          |   |          |          |          |   |           |          |          |   |          |          |          |   |           |           |           |   |           |           |           |   |           |          |           |   |           |          |          |   |           |           |          |
| H                                                                                                                                                                                                                                                                                                                                                                                                                                                                                                                                                                                                                                                                                                                                                                                                                                                                                                                                                                                                                                                                                                                                                                                                                                                                                                                                                                                                                                                                                                                                                                                                                                                                                                                                                                                                                                                                                                                                                                                                                                                                                                                                                                                                                                                                                                                                                                                                                                                                                                                                                                                                                                                                                                                                                                                                       | 1.889497                                                                          | -3.159909                                                                          | -2.901407 |                         |  |  |   |   |   |       |  |  |  |   |          |           |           |   |          |           |           |   |          |           |          |   |          |           |           |   |          |           |           |   |          |           |           |   |          |           |           |   |          |           |           |   |          |           |          |   |          |           |           |   |          |           |           |   |          |           |           |   |          |           |           |   |          |           |          |   |           |           |          |   |          |           |          |   |           |           |          |   |           |           |          |   |           |          |          |   |           |           |          |   |           |          |           |   |           |           |          |   |          |           |           |   |           |           |           |   |           |           |          |   |          |          |          |   |          |          |          |   |           |          |          |   |          |          |          |   |           |           |           |   |           |           |           |   |           |          |           |   |           |          |          |   |           |           |          |
| S                                                                                                                                                                                                                                                                                                                                                                                                                                                                                                                                                                                                                                                                                                                                                                                                                                                                                                                                                                                                                                                                                                                                                                                                                                                                                                                                                                                                                                                                                                                                                                                                                                                                                                                                                                                                                                                                                                                                                                                                                                                                                                                                                                                                                                                                                                                                                                                                                                                                                                                                                                                                                                                                                                                                                                                                       | 0.471810                                                                          | -1.688086                                                                          | 1.565381  |                         |  |  |   |   |   |       |  |  |  |   |          |           |           |   |          |           |           |   |          |           |          |   |          |           |           |   |          |           |           |   |          |           |           |   |          |           |           |   |          |           |           |   |          |           |          |   |          |           |           |   |          |           |           |   |          |           |           |   |          |           |           |   |          |           |          |   |           |           |          |   |          |           |          |   |           |           |          |   |           |           |          |   |           |          |          |   |           |           |          |   |           |          |           |   |           |           |          |   |          |           |           |   |           |           |           |   |           |           |          |   |          |          |          |   |          |          |          |   |           |          |          |   |          |          |          |   |           |           |           |   |           |           |           |   |           |          |           |   |           |          |          |   |           |           |          |
| O                                                                                                                                                                                                                                                                                                                                                                                                                                                                                                                                                                                                                                                                                                                                                                                                                                                                                                                                                                                                                                                                                                                                                                                                                                                                                                                                                                                                                                                                                                                                                                                                                                                                                                                                                                                                                                                                                                                                                                                                                                                                                                                                                                                                                                                                                                                                                                                                                                                                                                                                                                                                                                                                                                                                                                                                       | -0.470473                                                                         | -2.714005                                                                          | 2.029604  |                         |  |  |   |   |   |       |  |  |  |   |          |           |           |   |          |           |           |   |          |           |          |   |          |           |           |   |          |           |           |   |          |           |           |   |          |           |           |   |          |           |           |   |          |           |          |   |          |           |           |   |          |           |           |   |          |           |           |   |          |           |           |   |          |           |          |   |           |           |          |   |          |           |          |   |           |           |          |   |           |           |          |   |           |          |          |   |           |           |          |   |           |          |           |   |           |           |          |   |          |           |           |   |           |           |           |   |           |           |          |   |          |          |          |   |          |          |          |   |           |          |          |   |          |          |          |   |           |           |           |   |           |           |           |   |           |          |           |   |           |          |          |   |           |           |          |
| O                                                                                                                                                                                                                                                                                                                                                                                                                                                                                                                                                                                                                                                                                                                                                                                                                                                                                                                                                                                                                                                                                                                                                                                                                                                                                                                                                                                                                                                                                                                                                                                                                                                                                                                                                                                                                                                                                                                                                                                                                                                                                                                                                                                                                                                                                                                                                                                                                                                                                                                                                                                                                                                                                                                                                                                                       | 1.827747                                                                          | -1.626046                                                                          | 2.110073  |                         |  |  |   |   |   |       |  |  |  |   |          |           |           |   |          |           |           |   |          |           |          |   |          |           |           |   |          |           |           |   |          |           |           |   |          |           |           |   |          |           |           |   |          |           |          |   |          |           |           |   |          |           |           |   |          |           |           |   |          |           |           |   |          |           |          |   |           |           |          |   |          |           |          |   |           |           |          |   |           |           |          |   |           |          |          |   |           |           |          |   |           |          |           |   |           |           |          |   |          |           |           |   |           |           |           |   |           |           |          |   |          |          |          |   |          |          |          |   |           |          |          |   |          |          |          |   |           |           |           |   |           |           |           |   |           |          |           |   |           |          |          |   |           |           |          |
| C                                                                                                                                                                                                                                                                                                                                                                                                                                                                                                                                                                                                                                                                                                                                                                                                                                                                                                                                                                                                                                                                                                                                                                                                                                                                                                                                                                                                                                                                                                                                                                                                                                                                                                                                                                                                                                                                                                                                                                                                                                                                                                                                                                                                                                                                                                                                                                                                                                                                                                                                                                                                                                                                                                                                                                                                       | -1.760940                                                                         | -0.162624                                                                          | 1.975857  |                         |  |  |   |   |   |       |  |  |  |   |          |           |           |   |          |           |           |   |          |           |          |   |          |           |           |   |          |           |           |   |          |           |           |   |          |           |           |   |          |           |           |   |          |           |          |   |          |           |           |   |          |           |           |   |          |           |           |   |          |           |           |   |          |           |          |   |           |           |          |   |          |           |          |   |           |           |          |   |           |           |          |   |           |          |          |   |           |           |          |   |           |          |           |   |           |           |          |   |          |           |           |   |           |           |           |   |           |           |          |   |          |          |          |   |          |          |          |   |           |          |          |   |          |          |          |   |           |           |           |   |           |           |           |   |           |          |           |   |           |          |          |   |           |           |          |
| H                                                                                                                                                                                                                                                                                                                                                                                                                                                                                                                                                                                                                                                                                                                                                                                                                                                                                                                                                                                                                                                                                                                                                                                                                                                                                                                                                                                                                                                                                                                                                                                                                                                                                                                                                                                                                                                                                                                                                                                                                                                                                                                                                                                                                                                                                                                                                                                                                                                                                                                                                                                                                                                                                                                                                                                                       | -2.066329                                                                         | -0.995128                                                                          | 2.611569  |                         |  |  |   |   |   |       |  |  |  |   |          |           |           |   |          |           |           |   |          |           |          |   |          |           |           |   |          |           |           |   |          |           |           |   |          |           |           |   |          |           |           |   |          |           |          |   |          |           |           |   |          |           |           |   |          |           |           |   |          |           |           |   |          |           |          |   |           |           |          |   |          |           |          |   |           |           |          |   |           |           |          |   |           |          |          |   |           |           |          |   |           |          |           |   |           |           |          |   |          |           |           |   |           |           |           |   |           |           |          |   |          |          |          |   |          |          |          |   |           |          |          |   |          |          |          |   |           |           |           |   |           |           |           |   |           |          |           |   |           |          |          |   |           |           |          |
| H                                                                                                                                                                                                                                                                                                                                                                                                                                                                                                                                                                                                                                                                                                                                                                                                                                                                                                                                                                                                                                                                                                                                                                                                                                                                                                                                                                                                                                                                                                                                                                                                                                                                                                                                                                                                                                                                                                                                                                                                                                                                                                                                                                                                                                                                                                                                                                                                                                                                                                                                                                                                                                                                                                                                                                                                       | -1.978193                                                                         | 0.756606                                                                           | 2.526687  |                         |  |  |   |   |   |       |  |  |  |   |          |           |           |   |          |           |           |   |          |           |          |   |          |           |           |   |          |           |           |   |          |           |           |   |          |           |           |   |          |           |           |   |          |           |          |   |          |           |           |   |          |           |           |   |          |           |           |   |          |           |           |   |          |           |          |   |           |           |          |   |          |           |          |   |           |           |          |   |           |           |          |   |           |          |          |   |           |           |          |   |           |          |           |   |           |           |          |   |          |           |           |   |           |           |           |   |           |           |          |   |          |          |          |   |          |          |          |   |           |          |          |   |          |          |          |   |           |           |           |   |           |           |           |   |           |          |           |   |           |          |          |   |           |           |          |
| C                                                                                                                                                                                                                                                                                                                                                                                                                                                                                                                                                                                                                                                                                                                                                                                                                                                                                                                                                                                                                                                                                                                                                                                                                                                                                                                                                                                                                                                                                                                                                                                                                                                                                                                                                                                                                                                                                                                                                                                                                                                                                                                                                                                                                                                                                                                                                                                                                                                                                                                                                                                                                                                                                                                                                                                                       | -2.535657                                                                         | -0.183703                                                                          | 0.652283  |                         |  |  |   |   |   |       |  |  |  |   |          |           |           |   |          |           |           |   |          |           |          |   |          |           |           |   |          |           |           |   |          |           |           |   |          |           |           |   |          |           |           |   |          |           |          |   |          |           |           |   |          |           |           |   |          |           |           |   |          |           |           |   |          |           |          |   |           |           |          |   |          |           |          |   |           |           |          |   |           |           |          |   |           |          |          |   |           |           |          |   |           |          |           |   |           |           |          |   |          |           |           |   |           |           |           |   |           |           |          |   |          |          |          |   |          |          |          |   |           |          |          |   |          |          |          |   |           |           |           |   |           |           |           |   |           |          |           |   |           |          |          |   |           |           |          |
| H                                                                                                                                                                                                                                                                                                                                                                                                                                                                                                                                                                                                                                                                                                                                                                                                                                                                                                                                                                                                                                                                                                                                                                                                                                                                                                                                                                                                                                                                                                                                                                                                                                                                                                                                                                                                                                                                                                                                                                                                                                                                                                                                                                                                                                                                                                                                                                                                                                                                                                                                                                                                                                                                                                                                                                                                       | -2.147208                                                                         | 0.583212                                                                           | -0.029791 |                         |  |  |   |   |   |       |  |  |  |   |          |           |           |   |          |           |           |   |          |           |          |   |          |           |           |   |          |           |           |   |          |           |           |   |          |           |           |   |          |           |           |   |          |           |          |   |          |           |           |   |          |           |           |   |          |           |           |   |          |           |           |   |          |           |          |   |           |           |          |   |          |           |          |   |           |           |          |   |           |           |          |   |           |          |          |   |           |           |          |   |           |          |           |   |           |           |          |   |          |           |           |   |           |           |           |   |           |           |          |   |          |          |          |   |          |          |          |   |           |          |          |   |          |          |          |   |           |           |           |   |           |           |           |   |           |          |           |   |           |          |          |   |           |           |          |
| H                                                                                                                                                                                                                                                                                                                                                                                                                                                                                                                                                                                                                                                                                                                                                                                                                                                                                                                                                                                                                                                                                                                                                                                                                                                                                                                                                                                                                                                                                                                                                                                                                                                                                                                                                                                                                                                                                                                                                                                                                                                                                                                                                                                                                                                                                                                                                                                                                                                                                                                                                                                                                                                                                                                                                                                                       | -2.395528                                                                         | -1.154491                                                                          | 0.159264  |                         |  |  |   |   |   |       |  |  |  |   |          |           |           |   |          |           |           |   |          |           |          |   |          |           |           |   |          |           |           |   |          |           |           |   |          |           |           |   |          |           |           |   |          |           |          |   |          |           |           |   |          |           |           |   |          |           |           |   |          |           |           |   |          |           |          |   |           |           |          |   |          |           |          |   |           |           |          |   |           |           |          |   |           |          |          |   |           |           |          |   |           |          |           |   |           |           |          |   |          |           |           |   |           |           |           |   |           |           |          |   |          |          |          |   |          |          |          |   |           |          |          |   |          |          |          |   |           |           |           |   |           |           |           |   |           |          |           |   |           |          |          |   |           |           |          |
| N                                                                                                                                                                                                                                                                                                                                                                                                                                                                                                                                                                                                                                                                                                                                                                                                                                                                                                                                                                                                                                                                                                                                                                                                                                                                                                                                                                                                                                                                                                                                                                                                                                                                                                                                                                                                                                                                                                                                                                                                                                                                                                                                                                                                                                                                                                                                                                                                                                                                                                                                                                                                                                                                                                                                                                                                       | 0.639360                                                                          | -1.704129                                                                          | -0.122145 |                         |  |  |   |   |   |       |  |  |  |   |          |           |           |   |          |           |           |   |          |           |          |   |          |           |           |   |          |           |           |   |          |           |           |   |          |           |           |   |          |           |           |   |          |           |          |   |          |           |           |   |          |           |           |   |          |           |           |   |          |           |           |   |          |           |          |   |           |           |          |   |          |           |          |   |           |           |          |   |           |           |          |   |           |          |          |   |           |           |          |   |           |          |           |   |           |           |          |   |          |           |           |   |           |           |           |   |           |           |          |   |          |          |          |   |          |          |          |   |           |          |          |   |          |          |          |   |           |           |           |   |           |           |           |   |           |          |           |   |           |          |          |   |           |           |          |
| H                                                                                                                                                                                                                                                                                                                                                                                                                                                                                                                                                                                                                                                                                                                                                                                                                                                                                                                                                                                                                                                                                                                                                                                                                                                                                                                                                                                                                                                                                                                                                                                                                                                                                                                                                                                                                                                                                                                                                                                                                                                                                                                                                                                                                                                                                                                                                                                                                                                                                                                                                                                                                                                                                                                                                                                                       | -0.293467                                                                         | -1.851989                                                                          | -0.506104 |                         |  |  |   |   |   |       |  |  |  |   |          |           |           |   |          |           |           |   |          |           |          |   |          |           |           |   |          |           |           |   |          |           |           |   |          |           |           |   |          |           |           |   |          |           |          |   |          |           |           |   |          |           |           |   |          |           |           |   |          |           |           |   |          |           |          |   |           |           |          |   |          |           |          |   |           |           |          |   |           |           |          |   |           |          |          |   |           |           |          |   |           |          |           |   |           |           |          |   |          |           |           |   |           |           |           |   |           |           |          |   |          |          |          |   |          |          |          |   |           |          |          |   |          |          |          |   |           |           |           |   |           |           |           |   |           |          |           |   |           |          |          |   |           |           |          |
| N                                                                                                                                                                                                                                                                                                                                                                                                                                                                                                                                                                                                                                                                                                                                                                                                                                                                                                                                                                                                                                                                                                                                                                                                                                                                                                                                                                                                                                                                                                                                                                                                                                                                                                                                                                                                                                                                                                                                                                                                                                                                                                                                                                                                                                                                                                                                                                                                                                                                                                                                                                                                                                                                                                                                                                                                       | -0.285932                                                                         | -0.219127                                                                          | 1.852925  |                         |  |  |   |   |   |       |  |  |  |   |          |           |           |   |          |           |           |   |          |           |          |   |          |           |           |   |          |           |           |   |          |           |           |   |          |           |           |   |          |           |           |   |          |           |          |   |          |           |           |   |          |           |           |   |          |           |           |   |          |           |           |   |          |           |          |   |           |           |          |   |          |           |          |   |           |           |          |   |           |           |          |   |           |          |          |   |           |           |          |   |           |          |           |   |           |           |          |   |          |           |           |   |           |           |           |   |           |           |          |   |          |          |          |   |          |          |          |   |           |          |          |   |          |          |          |   |           |           |           |   |           |           |           |   |           |          |           |   |           |          |          |   |           |           |          |
| C                                                                                                                                                                                                                                                                                                                                                                                                                                                                                                                                                                                                                                                                                                                                                                                                                                                                                                                                                                                                                                                                                                                                                                                                                                                                                                                                                                                                                                                                                                                                                                                                                                                                                                                                                                                                                                                                                                                                                                                                                                                                                                                                                                                                                                                                                                                                                                                                                                                                                                                                                                                                                                                                                                                                                                                                       | 0.434371                                                                          | 0.982983                                                                           | 1.462004  |                         |  |  |   |   |   |       |  |  |  |   |          |           |           |   |          |           |           |   |          |           |          |   |          |           |           |   |          |           |           |   |          |           |           |   |          |           |           |   |          |           |           |   |          |           |          |   |          |           |           |   |          |           |           |   |          |           |           |   |          |           |           |   |          |           |          |   |           |           |          |   |          |           |          |   |           |           |          |   |           |           |          |   |           |          |          |   |           |           |          |   |           |          |           |   |           |           |          |   |          |           |           |   |           |           |           |   |           |           |          |   |          |          |          |   |          |          |          |   |           |          |          |   |          |          |          |   |           |           |           |   |           |           |           |   |           |          |           |   |           |          |          |   |           |           |          |
| H                                                                                                                                                                                                                                                                                                                                                                                                                                                                                                                                                                                                                                                                                                                                                                                                                                                                                                                                                                                                                                                                                                                                                                                                                                                                                                                                                                                                                                                                                                                                                                                                                                                                                                                                                                                                                                                                                                                                                                                                                                                                                                                                                                                                                                                                                                                                                                                                                                                                                                                                                                                                                                                                                                                                                                                                       | 1.361264                                                                          | 0.725049                                                                           | 0.946833  |                         |  |  |   |   |   |       |  |  |  |   |          |           |           |   |          |           |           |   |          |           |          |   |          |           |           |   |          |           |           |   |          |           |           |   |          |           |           |   |          |           |           |   |          |           |          |   |          |           |           |   |          |           |           |   |          |           |           |   |          |           |           |   |          |           |          |   |           |           |          |   |          |           |          |   |           |           |          |   |           |           |          |   |           |          |          |   |           |           |          |   |           |          |           |   |           |           |          |   |          |           |           |   |           |           |           |   |           |           |          |   |          |          |          |   |          |          |          |   |           |          |          |   |          |          |          |   |           |           |           |   |           |           |           |   |           |          |           |   |           |          |          |   |           |           |          |
| H                                                                                                                                                                                                                                                                                                                                                                                                                                                                                                                                                                                                                                                                                                                                                                                                                                                                                                                                                                                                                                                                                                                                                                                                                                                                                                                                                                                                                                                                                                                                                                                                                                                                                                                                                                                                                                                                                                                                                                                                                                                                                                                                                                                                                                                                                                                                                                                                                                                                                                                                                                                                                                                                                                                                                                                                       | -0.162467                                                                         | 1.598213                                                                           | 0.779999  |                         |  |  |   |   |   |       |  |  |  |   |          |           |           |   |          |           |           |   |          |           |          |   |          |           |           |   |          |           |           |   |          |           |           |   |          |           |           |   |          |           |           |   |          |           |          |   |          |           |           |   |          |           |           |   |          |           |           |   |          |           |           |   |          |           |          |   |           |           |          |   |          |           |          |   |           |           |          |   |           |           |          |   |           |          |          |   |           |           |          |   |           |          |           |   |           |           |          |   |          |           |           |   |           |           |           |   |           |           |          |   |          |          |          |   |          |          |          |   |           |          |          |   |          |          |          |   |           |           |           |   |           |           |           |   |           |          |           |   |           |          |          |   |           |           |          |
| C                                                                                                                                                                                                                                                                                                                                                                                                                                                                                                                                                                                                                                                                                                                                                                                                                                                                                                                                                                                                                                                                                                                                                                                                                                                                                                                                                                                                                                                                                                                                                                                                                                                                                                                                                                                                                                                                                                                                                                                                                                                                                                                                                                                                                                                                                                                                                                                                                                                                                                                                                                                                                                                                                                                                                                                                       | 0.814669                                                                          | 1.862830                                                                           | 2.651264  |                         |  |  |   |   |   |       |  |  |  |   |          |           |           |   |          |           |           |   |          |           |          |   |          |           |           |   |          |           |           |   |          |           |           |   |          |           |           |   |          |           |           |   |          |           |          |   |          |           |           |   |          |           |           |   |          |           |           |   |          |           |           |   |          |           |          |   |           |           |          |   |          |           |          |   |           |           |          |   |           |           |          |   |           |          |          |   |           |           |          |   |           |          |           |   |           |           |          |   |          |           |           |   |           |           |           |   |           |           |          |   |          |          |          |   |          |          |          |   |           |          |          |   |          |          |          |   |           |           |           |   |           |           |           |   |           |          |           |   |           |          |          |   |           |           |          |
| C                                                                                                                                                                                                                                                                                                                                                                                                                                                                                                                                                                                                                                                                                                                                                                                                                                                                                                                                                                                                                                                                                                                                                                                                                                                                                                                                                                                                                                                                                                                                                                                                                                                                                                                                                                                                                                                                                                                                                                                                                                                                                                                                                                                                                                                                                                                                                                                                                                                                                                                                                                                                                                                                                                                                                                                                       | -4.849466                                                                         | -0.026925                                                                          | -0.387081 |                         |  |  |   |   |   |       |  |  |  |   |          |           |           |   |          |           |           |   |          |           |          |   |          |           |           |   |          |           |           |   |          |           |           |   |          |           |           |   |          |           |           |   |          |           |          |   |          |           |           |   |          |           |           |   |          |           |           |   |          |           |           |   |          |           |          |   |           |           |          |   |          |           |          |   |           |           |          |   |           |           |          |   |           |          |          |   |           |           |          |   |           |          |           |   |           |           |          |   |          |           |           |   |           |           |           |   |           |           |          |   |          |          |          |   |          |          |          |   |           |          |          |   |          |          |          |   |           |           |           |   |           |           |           |   |           |          |           |   |           |          |          |   |           |           |          |
| H                                                                                                                                                                                                                                                                                                                                                                                                                                                                                                                                                                                                                                                                                                                                                                                                                                                                                                                                                                                                                                                                                                                                                                                                                                                                                                                                                                                                                                                                                                                                                                                                                                                                                                                                                                                                                                                                                                                                                                                                                                                                                                                                                                                                                                                                                                                                                                                                                                                                                                                                                                                                                                                                                                                                                                                                       | -4.506106                                                                         | -0.689127                                                                          | -1.182267 |                         |  |  |   |   |   |       |  |  |  |   |          |           |           |   |          |           |           |   |          |           |          |   |          |           |           |   |          |           |           |   |          |           |           |   |          |           |           |   |          |           |           |   |          |           |          |   |          |           |           |   |          |           |           |   |          |           |           |   |          |           |           |   |          |           |          |   |           |           |          |   |          |           |          |   |           |           |          |   |           |           |          |   |           |          |          |   |           |           |          |   |           |          |           |   |           |           |          |   |          |           |           |   |           |           |           |   |           |           |          |   |          |          |          |   |          |          |          |   |           |          |          |   |          |          |          |   |           |           |           |   |           |           |           |   |           |          |           |   |           |          |          |   |           |           |          |
| C                                                                                                                                                                                                                                                                                                                                                                                                                                                                                                                                                                                                                                                                                                                                                                                                                                                                                                                                                                                                                                                                                                                                                                                                                                                                                                                                                                                                                                                                                                                                                                                                                                                                                                                                                                                                                                                                                                                                                                                                                                                                                                                                                                                                                                                                                                                                                                                                                                                                                                                                                                                                                                                                                                                                                                                                       | -6.257701                                                                         | 0.472241                                                                           | -0.440566 |                         |  |  |   |   |   |       |  |  |  |   |          |           |           |   |          |           |           |   |          |           |          |   |          |           |           |   |          |           |           |   |          |           |           |   |          |           |           |   |          |           |           |   |          |           |          |   |          |           |           |   |          |           |           |   |          |           |           |   |          |           |           |   |          |           |          |   |           |           |          |   |          |           |          |   |           |           |          |   |           |           |          |   |           |          |          |   |           |           |          |   |           |          |           |   |           |           |          |   |          |           |           |   |           |           |           |   |           |           |          |   |          |          |          |   |          |          |          |   |           |          |          |   |          |          |          |   |           |           |           |   |           |           |           |   |           |          |           |   |           |          |          |   |           |           |          |
| H                                                                                                                                                                                                                                                                                                                                                                                                                                                                                                                                                                                                                                                                                                                                                                                                                                                                                                                                                                                                                                                                                                                                                                                                                                                                                                                                                                                                                                                                                                                                                                                                                                                                                                                                                                                                                                                                                                                                                                                                                                                                                                                                                                                                                                                                                                                                                                                                                                                                                                                                                                                                                                                                                                                                                                                                       | -6.316343                                                                         | 1.460696                                                                           | 0.040534  |                         |  |  |   |   |   |       |  |  |  |   |          |           |           |   |          |           |           |   |          |           |          |   |          |           |           |   |          |           |           |   |          |           |           |   |          |           |           |   |          |           |           |   |          |           |          |   |          |           |           |   |          |           |           |   |          |           |           |   |          |           |           |   |          |           |          |   |           |           |          |   |          |           |          |   |           |           |          |   |           |           |          |   |           |          |          |   |           |           |          |   |           |          |           |   |           |           |          |   |          |           |           |   |           |           |           |   |           |           |          |   |          |          |          |   |          |          |          |   |           |          |          |   |          |          |          |   |           |           |           |   |           |           |           |   |           |          |           |   |           |          |          |   |           |           |          |
| H                                                                                                                                                                                                                                                                                                                                                                                                                                                                                                                                                                                                                                                                                                                                                                                                                                                                                                                                                                                                                                                                                                                                                                                                                                                                                                                                                                                                                                                                                                                                                                                                                                                                                                                                                                                                                                                                                                                                                                                                                                                                                                                                                                                                                                                                                                                                                                                                                                                                                                                                                                                                                                                                                                                                                                                                       | -6.908220                                                                         | -0.178434                                                                          | 0.174928  |                         |  |  |   |   |   |       |  |  |  |   |          |           |           |   |          |           |           |   |          |           |          |   |          |           |           |   |          |           |           |   |          |           |           |   |          |           |           |   |          |           |           |   |          |           |          |   |          |           |           |   |          |           |           |   |          |           |           |   |          |           |           |   |          |           |          |   |           |           |          |   |          |           |          |   |           |           |          |   |           |           |          |   |           |          |          |   |           |           |          |   |           |          |           |   |           |           |          |   |          |           |           |   |           |           |           |   |           |           |          |   |          |          |          |   |          |          |          |   |           |          |          |   |          |          |          |   |           |           |           |   |           |           |           |   |           |          |           |   |           |          |          |   |           |           |          |

|    |                                                                                   |                                                                                    |                         |           |           |
|----|-----------------------------------------------------------------------------------|------------------------------------------------------------------------------------|-------------------------|-----------|-----------|
|    |                                                                                   | C                                                                                  | -6.837727               | 0.549216  | -1.859588 |
|    |                                                                                   | H                                                                                  | -6.823947               | -0.434400 | -2.343073 |
|    |                                                                                   | H                                                                                  | -7.875127               | 0.899034  | -1.844190 |
|    |                                                                                   | H                                                                                  | -6.257913               | 1.237216  | -2.484682 |
|    |                                                                                   | F                                                                                  | 1.489751                | 2.956424  | 2.206357  |
|    |                                                                                   | F                                                                                  | -0.274530               | 2.320913  | 3.324900  |
|    |                                                                                   | F                                                                                  | 1.599662                | 1.237890  | 3.547417  |
|    |                                                                                   | C                                                                                  | -4.040587               | 0.047734  | 0.868753  |
|    |                                                                                   | H                                                                                  | -4.197823               | 1.023954  | 1.352788  |
|    |                                                                                   | H                                                                                  | -4.409452               | -0.696709 | 1.600743  |
| 16 | 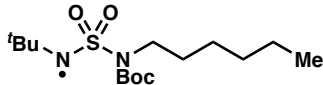 |  |                         |           |           |
|    |                                                                                   | Atom                                                                               | Coordinates (Angstroms) |           |           |
|    |                                                                                   |                                                                                    | X                       | Y         | Z         |
|    |                                                                                   |                                                                                    | -----                   |           |           |
|    |                                                                                   | N                                                                                  | -0.006407               | 1.320439  | -0.972133 |
|    |                                                                                   | S                                                                                  | 1.481679                | 0.888931  | -0.299540 |
|    |                                                                                   | O                                                                                  | 1.494816                | -0.507797 | 0.137390  |
|    |                                                                                   | O                                                                                  | 1.858338                | 1.944276  | 0.649378  |
|    |                                                                                   | N                                                                                  | 2.533728                | 1.092298  | -1.626757 |
|    |                                                                                   | C                                                                                  | 3.423073                | 2.284577  | -1.658636 |
|    |                                                                                   | H                                                                                  | 3.699130                | 2.514300  | -0.629929 |
|    |                                                                                   | H                                                                                  | 4.320103                | 1.964387  | -2.190986 |
|    |                                                                                   | C                                                                                  | 2.790737                | 3.499181  | -2.342495 |
|    |                                                                                   | H                                                                                  | 2.477619                | 3.217248  | -3.355153 |
|    |                                                                                   | H                                                                                  | 1.887135                | 3.795059  | -1.795660 |
|    |                                                                                   | C                                                                                  | 3.764118                | 4.683424  | -2.413095 |
|    |                                                                                   | H                                                                                  | 4.085513                | 4.953450  | -1.396866 |
|    |                                                                                   | H                                                                                  | 4.671573                | 4.376788  | -2.952728 |
|    |                                                                                   | C                                                                                  | 4.128629                | 7.107965  | -3.175542 |
|    |                                                                                   | H                                                                                  | 5.036178                | 6.801382  | -3.713861 |
|    |                                                                                   | H                                                                                  | 4.451781                | 7.377847  | -2.160551 |
|    |                                                                                   | C                                                                                  | 1.427299                | -1.718163 | -3.735947 |
|    |                                                                                   | C                                                                                  | 0.268301                | -2.560167 | -3.201197 |
|    |                                                                                   | H                                                                                  | -0.645691               | -1.964055 | -3.131648 |
|    |                                                                                   | H                                                                                  | 0.082875                | -3.399043 | -3.878646 |
|    |                                                                                   | H                                                                                  | 0.503161                | -2.957102 | -2.209747 |
|    |                                                                                   | C                                                                                  | 2.716455                | -2.541846 | -3.791066 |
|    |                                                                                   | H                                                                                  | 3.553123                | -1.954776 | -4.171806 |
|    |                                                                                   | H                                                                                  | 2.968856                | -2.923340 | -2.796810 |

|                              |                                                                                     |                                                                                      |           |
|------------------------------|-------------------------------------------------------------------------------------|--------------------------------------------------------------------------------------|-----------|
| H                            | 2.562712                                                                            | -3.398671                                                                            | -4.455033 |
| C                            | 1.069355                                                                            | -1.083439                                                                            | -5.081959 |
| H                            | 0.183231                                                                            | -0.448804                                                                            | -4.981298 |
| H                            | 1.892554                                                                            | -0.485172                                                                            | -5.474365 |
| H                            | 0.839341                                                                            | -1.876564                                                                            | -5.801003 |
| C                            | 2.513215                                                                            | 0.269692                                                                             | -2.765838 |
| O                            | 3.303105                                                                            | 0.436786                                                                             | -3.679302 |
| O                            | 1.555653                                                                            | -0.654670                                                                            | -2.698512 |
| C                            | 3.162840                                                                            | 5.918233                                                                             | -3.097622 |
| H                            | 2.254390                                                                            | 6.224882                                                                             | -2.559013 |
| H                            | 2.839959                                                                            | 5.647585                                                                             | -4.113368 |
| C                            | 3.520166                                                                            | 8.337124                                                                             | -3.860676 |
| H                            | 2.629945                                                                            | 8.688423                                                                             | -3.325209 |
| H                            | 4.233873                                                                            | 9.167291                                                                             | -3.900394 |
| H                            | 3.218406                                                                            | 8.107660                                                                             | -4.889693 |
| C                            | -1.237307                                                                           | 1.139240                                                                             | -0.179181 |
| C                            | -2.183092                                                                           | 2.257762                                                                             | -0.664355 |
| H                            | -2.293935                                                                           | 2.227405                                                                             | -1.751718 |
| H                            | -3.168878                                                                           | 2.129995                                                                             | -0.205927 |
| H                            | -1.795297                                                                           | 3.240944                                                                             | -0.381912 |
| C                            | -1.086091                                                                           | 1.196076                                                                             | 1.353435  |
| H                            | -0.461005                                                                           | 0.384718                                                                             | 1.733543  |
| H                            | -0.655416                                                                           | 2.148024                                                                             | 1.673018  |
| H                            | -2.078171                                                                           | 1.097467                                                                             | 1.804538  |
| C                            | -1.803291                                                                           | -0.244427                                                                            | -0.608393 |
| H                            | -1.933187                                                                           | -0.291309                                                                            | -1.692409 |
| H                            | -1.138066                                                                           | -1.050664                                                                            | -0.292934 |
| H                            | -2.780116                                                                           | -0.376330                                                                            | -0.131739 |
| 17                           | 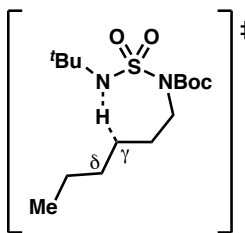 |  |           |
| Atom Coordinates (Angstroms) |                                                                                     |                                                                                      |           |
|                              | X                                                                                   | Y                                                                                    | Z         |
| -----                        |                                                                                     |                                                                                      |           |
| C                            | 1.440738                                                                            | 0.501914                                                                             | -0.000226 |
| C                            | 0.116094                                                                            | 1.259357                                                                             | -0.245403 |
| H                            | 1.223895                                                                            | -0.488972                                                                            | 0.405236  |
| H                            | 1.982898                                                                            | 1.050063                                                                             | 0.785866  |
| H                            | -0.602372                                                                           | 1.004933                                                                             | 0.536912  |
| H                            | 0.268140                                                                            | 2.337202                                                                             | -0.225825 |
| S                            | -0.759206                                                                           | -0.645303                                                                            | -1.999835 |
| O                            | -1.889197                                                                           | -0.773804                                                                            | -2.917031 |

*Supporting Information for Sulfamides Direct Radical-Mediated Chlorination*

|   |           |           |           |
|---|-----------|-----------|-----------|
| O | -0.853123 | -1.340130 | -0.706047 |
| N | 0.678483  | -0.925696 | -2.833472 |
| C | 3.768283  | 1.390361  | -3.089948 |
| H | 4.593496  | 0.729753  | -2.790134 |
| H | 3.215621  | 0.861098  | -3.875270 |
| C | 2.344238  | 0.355127  | -1.213435 |
| H | 1.595640  | -0.296769 | -2.092986 |
| H | 3.147074  | -0.368983 | -1.035578 |
| C | 2.843004  | 1.620204  | -1.887139 |
| H | 3.391549  | 2.196995  | -1.121316 |
| H | 2.003575  | 2.259426  | -2.184642 |
| C | 4.339218  | 2.695246  | -3.656653 |
| H | 4.930390  | 3.229895  | -2.903783 |
| H | 4.989566  | 2.503045  | -4.516537 |
| H | 3.538381  | 3.366811  | -3.987173 |
| N | -0.496495 | 0.998447  | -1.574943 |
| C | -0.730561 | 2.095266  | -2.426402 |
| O | -0.653713 | 3.243902  | -2.017547 |
| O | -1.007647 | 1.716090  | -3.668769 |
| C | -1.469181 | 2.682718  | -4.701913 |
| C | -0.352050 | 3.682469  | -5.012517 |
| H | -0.650807 | 4.298899  | -5.866857 |
| H | -0.152764 | 4.336645  | -4.162814 |
| H | 0.568207  | 3.154259  | -5.281686 |
| C | -2.757821 | 3.362476  | -4.232733 |
| H | -2.579956 | 4.012597  | -3.374671 |
| H | -3.159097 | 3.969914  | -5.050439 |
| H | -3.509018 | 2.612932  | -3.965404 |
| C | -1.736226 | 1.770891  | -5.900712 |
| H | -2.088092 | 2.369728  | -6.746307 |
| H | -0.822604 | 1.249104  | -6.199923 |
| H | -2.497335 | 1.024859  | -5.657502 |
| C | 1.111921  | -2.334195 | -3.123919 |
| C | -0.000327 | -3.057383 | -3.914560 |
| H | -0.309380 | -2.469729 | -4.782464 |
| H | 0.389862  | -4.019683 | -4.261846 |
| H | -0.881697 | -3.250983 | -3.298645 |
| C | 1.473354  | -3.145359 | -1.862730 |
| C | 2.351763  | -2.181901 | -4.022809 |
| H | 2.107838  | -1.615889 | -4.926322 |
| H | 3.162276  | -1.666146 | -3.499230 |
| H | 2.717429  | -3.170739 | -4.317224 |
| H | 0.612801  | -3.269379 | -1.203019 |
| H | 2.273801  | -2.658120 | -1.297239 |
| H | 1.830376  | -4.136779 | -2.160718 |

| 18                                                                                                                                                                                                                                          | 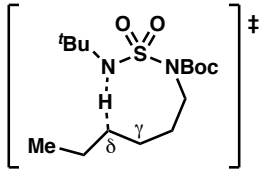 |  |           |           |                         |  |  |  |   |   |   |
|---------------------------------------------------------------------------------------------------------------------------------------------------------------------------------------------------------------------------------------------|-----------------------------------------------------------------------------------|------------------------------------------------------------------------------------|-----------|-----------|-------------------------|--|--|--|---|---|---|
| <table border="0" style="width: 100%; text-align: center;"> <thead> <tr> <th style="text-align: left;">Atom</th> <th colspan="3">Coordinates (Angstroms)</th> </tr> <tr> <th></th> <th>X</th> <th>Y</th> <th>Z</th> </tr> </thead> </table> |                                                                                   |                                                                                    |           | Atom      | Coordinates (Angstroms) |  |  |  | X | Y | Z |
| Atom                                                                                                                                                                                                                                        | Coordinates (Angstroms)                                                           |                                                                                    |           |           |                         |  |  |  |   |   |   |
|                                                                                                                                                                                                                                             | X                                                                                 | Y                                                                                  | Z         |           |                         |  |  |  |   |   |   |
| -----                                                                                                                                                                                                                                       |                                                                                   |                                                                                    |           |           |                         |  |  |  |   |   |   |
|                                                                                                                                                                                                                                             | C                                                                                 | -2.221695                                                                          | 0.984409  | 0.000364  |                         |  |  |  |   |   |   |
|                                                                                                                                                                                                                                             | C                                                                                 | -0.795483                                                                          | 0.945940  | -0.530879 |                         |  |  |  |   |   |   |
|                                                                                                                                                                                                                                             | H                                                                                 | -2.200187                                                                          | 0.734382  | 1.068963  |                         |  |  |  |   |   |   |
|                                                                                                                                                                                                                                             | H                                                                                 | -0.112133                                                                          | 1.505725  | 0.119015  |                         |  |  |  |   |   |   |
|                                                                                                                                                                                                                                             | H                                                                                 | -2.578245                                                                          | 2.025506  | -0.051664 |                         |  |  |  |   |   |   |
|                                                                                                                                                                                                                                             | C                                                                                 | -2.975107                                                                          | -1.422997 | -0.673804 |                         |  |  |  |   |   |   |
|                                                                                                                                                                                                                                             | H                                                                                 | -2.619939                                                                          | -1.736860 | 0.307315  |                         |  |  |  |   |   |   |
|                                                                                                                                                                                                                                             | H                                                                                 | -3.898973                                                                          | -1.961508 | -0.892932 |                         |  |  |  |   |   |   |
|                                                                                                                                                                                                                                             | C                                                                                 | -3.253037                                                                          | 0.087905  | -0.706310 |                         |  |  |  |   |   |   |
|                                                                                                                                                                                                                                             | H                                                                                 | -3.398374                                                                          | 0.395410  | -1.746431 |                         |  |  |  |   |   |   |
|                                                                                                                                                                                                                                             | H                                                                                 | -4.219771                                                                          | 0.240680  | -0.209900 |                         |  |  |  |   |   |   |
|                                                                                                                                                                                                                                             | N                                                                                 | -0.237135                                                                          | -1.543116 | 0.166843  |                         |  |  |  |   |   |   |
|                                                                                                                                                                                                                                             | H                                                                                 | -0.440305                                                                          | -0.274305 | -0.249937 |                         |  |  |  |   |   |   |
|                                                                                                                                                                                                                                             | C                                                                                 | -0.531695                                                                          | 1.234142  | -1.998382 |                         |  |  |  |   |   |   |
|                                                                                                                                                                                                                                             | H                                                                                 | 0.495348                                                                           | 0.940479  | -2.243334 |                         |  |  |  |   |   |   |
|                                                                                                                                                                                                                                             | H                                                                                 | -1.184942                                                                          | 0.626154  | -2.630852 |                         |  |  |  |   |   |   |
|                                                                                                                                                                                                                                             | C                                                                                 | -0.720773                                                                          | 2.725444  | -2.345936 |                         |  |  |  |   |   |   |
|                                                                                                                                                                                                                                             | H                                                                                 | -0.482158                                                                          | 2.901213  | -3.400138 |                         |  |  |  |   |   |   |
|                                                                                                                                                                                                                                             | H                                                                                 | -1.752388                                                                          | 3.052009  | -2.178207 |                         |  |  |  |   |   |   |
|                                                                                                                                                                                                                                             | H                                                                                 | -0.063147                                                                          | 3.360747  | -1.741717 |                         |  |  |  |   |   |   |
|                                                                                                                                                                                                                                             | S                                                                                 | -0.419923                                                                          | -2.486989 | -1.207909 |                         |  |  |  |   |   |   |
|                                                                                                                                                                                                                                             | O                                                                                 | -0.560044                                                                          | -3.891397 | -0.797806 |                         |  |  |  |   |   |   |
|                                                                                                                                                                                                                                             | O                                                                                 | 0.541871                                                                           | -2.162929 | -2.267107 |                         |  |  |  |   |   |   |
|                                                                                                                                                                                                                                             | N                                                                                 | -1.976933                                                                          | -1.874109 | -1.687865 |                         |  |  |  |   |   |   |
|                                                                                                                                                                                                                                             | C                                                                                 | -2.512563                                                                          | -2.213865 | -2.941582 |                         |  |  |  |   |   |   |
|                                                                                                                                                                                                                                             | O                                                                                 | -3.620221                                                                          | -1.823028 | -3.277916 |                         |  |  |  |   |   |   |
|                                                                                                                                                                                                                                             | O                                                                                 | -1.693097                                                                          | -2.986346 | -3.649916 |                         |  |  |  |   |   |   |
|                                                                                                                                                                                                                                             | C                                                                                 | -2.001625                                                                          | -3.408422 | -5.041847 |                         |  |  |  |   |   |   |
|                                                                                                                                                                                                                                             | C                                                                                 | -0.762811                                                                          | -4.226094 | -5.412137 |                         |  |  |  |   |   |   |
|                                                                                                                                                                                                                                             | H                                                                                 | -0.865730                                                                          | -4.607145 | -6.432799 |                         |  |  |  |   |   |   |
|                                                                                                                                                                                                                                             | H                                                                                 | 0.138379                                                                           | -3.609615 | -5.355918 |                         |  |  |  |   |   |   |
|                                                                                                                                                                                                                                             | H                                                                                 | -0.643801                                                                          | -5.074727 | -4.732609 |                         |  |  |  |   |   |   |
|                                                                                                                                                                                                                                             | C                                                                                 | -2.134535                                                                          | -2.174763 | -5.938094 |                         |  |  |  |   |   |   |
|                                                                                                                                                                                                                                             | H                                                                                 | -2.231200                                                                          | -2.498387 | -6.979651 |                         |  |  |  |   |   |   |
|                                                                                                                                                                                                                                             | H                                                                                 | -3.012688                                                                          | -1.582111 | -5.676873 |                         |  |  |  |   |   |   |
|                                                                                                                                                                                                                                             | H                                                                                 | -1.241096                                                                          | -1.547596 | -5.858727 |                         |  |  |  |   |   |   |

Supporting Information for Sulfamides Direct Radical-Mediated Chlorination

|    |                                                                                    |                                                                                     |                         |           |           |  |
|----|------------------------------------------------------------------------------------|-------------------------------------------------------------------------------------|-------------------------|-----------|-----------|--|
|    |                                                                                    |                                                                                     |                         |           |           |  |
|    |                                                                                    | C                                                                                   | -3.258234               | -4.282876 | -5.048469 |  |
|    |                                                                                    | H                                                                                   | -4.146849               | -3.709185 | -4.781606 |  |
|    |                                                                                    | H                                                                                   | -3.398416               | -4.699424 | -6.051391 |  |
|    |                                                                                    | H                                                                                   | -3.146494               | -5.115632 | -4.347045 |  |
|    |                                                                                    | C                                                                                   | 1.059216                | -1.590347 | 0.931229  |  |
|    |                                                                                    | C                                                                                   | 0.779193                | -0.783678 | 2.213422  |  |
|    |                                                                                    | H                                                                                   | 1.671890                | -0.779618 | 2.846885  |  |
|    |                                                                                    | H                                                                                   | 0.524251                | 0.255956  | 1.988757  |  |
|    |                                                                                    | H                                                                                   | -0.045639               | -1.228978 | 2.777084  |  |
|    |                                                                                    | C                                                                                   | 2.239821                | -0.966927 | 0.159109  |  |
|    |                                                                                    | H                                                                                   | 3.132472                | -0.976133 | 0.793340  |  |
|    |                                                                                    | H                                                                                   | 2.457720                | -1.520338 | -0.756275 |  |
|    |                                                                                    | H                                                                                   | 2.029529                | 0.072587  | -0.110761 |  |
|    |                                                                                    | C                                                                                   | 1.399914                | -3.043527 | 1.326339  |  |
|    |                                                                                    | H                                                                                   | 2.245463                | -3.019059 | 2.021500  |  |
|    |                                                                                    | H                                                                                   | 0.553569                | -3.525724 | 1.821425  |  |
|    |                                                                                    | H                                                                                   | 1.682981                | -3.650308 | 0.464300  |  |
| 19 | 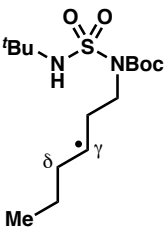 |  |                         |           |           |  |
|    |                                                                                    | Atom                                                                                | Coordinates (Angstroms) |           |           |  |
|    |                                                                                    |                                                                                     | X                       | Y         | Z         |  |
|    |                                                                                    | -----                                                                               |                         |           |           |  |
|    |                                                                                    | S                                                                                   | -2.109665               | 1.505576  | 0.000000  |  |
|    |                                                                                    | O                                                                                   | -2.888668               | 1.119569  | 1.179354  |  |
|    |                                                                                    | O                                                                                   | -0.707164               | 1.873920  | 0.113968  |  |
|    |                                                                                    | N                                                                                   | -2.979101               | 2.878723  | -0.636134 |  |
|    |                                                                                    | C                                                                                   | -4.419855               | 3.001225  | -0.291698 |  |
|    |                                                                                    | H                                                                                   | -4.602443               | 2.386066  | 0.586869  |  |
|    |                                                                                    | H                                                                                   | -4.587856               | 4.043930  | -0.016461 |  |
|    |                                                                                    | C                                                                                   | -5.356583               | 2.603675  | -1.442667 |  |
|    |                                                                                    | H                                                                                   | -5.056387               | 3.163469  | -2.346423 |  |
|    |                                                                                    | H                                                                                   | -5.220328               | 1.540844  | -1.689449 |  |
|    |                                                                                    | N                                                                                   | -2.258795               | 0.199270  | -1.012735 |  |
|    |                                                                                    | H                                                                                   | -3.183878               | -0.202584 | -0.887891 |  |
|    |                                                                                    | C                                                                                   | -6.791996               | 2.870283  | -1.120576 |  |
|    |                                                                                    | H                                                                                   | -7.026880               | 3.747279  | -0.517455 |  |
|    |                                                                                    | C                                                                                   | -7.901526               | 2.211089  | -1.874428 |  |
|    |                                                                                    | H                                                                                   | -7.683426               | 1.137321  | -1.991531 |  |
|    |                                                                                    | H                                                                                   | -7.939237               | 2.605374  | -2.909242 |  |

Supporting Information for Sulfamides Direct Radical-Mediated Chlorination

|    |                                                                                     |                                                                                                                                                                                                                                                                                                                                                                                                                                                                                                                                                                                                                                                                                                                                                                                                                                                                                                                                                                                                                                                                                                                                                                                                                                                                        |
|----|-------------------------------------------------------------------------------------|------------------------------------------------------------------------------------------------------------------------------------------------------------------------------------------------------------------------------------------------------------------------------------------------------------------------------------------------------------------------------------------------------------------------------------------------------------------------------------------------------------------------------------------------------------------------------------------------------------------------------------------------------------------------------------------------------------------------------------------------------------------------------------------------------------------------------------------------------------------------------------------------------------------------------------------------------------------------------------------------------------------------------------------------------------------------------------------------------------------------------------------------------------------------------------------------------------------------------------------------------------------------|
|    |                                                                                     | C -9.288383 2.387469 -1.235611<br>H -9.496561 3.460240 -1.125851<br>H -9.269558 1.971978 -0.219738<br>C -10.411328 1.727509 -2.042654<br>H -10.246088 0.647992 -2.142735<br>H -11.384651 1.871243 -1.561449<br>H -10.473760 2.148527 -3.053325<br>C -1.653298 -0.066868 -2.358169<br>C -2.025867 -1.533991 -2.644824<br>C -2.425568 3.950593 -1.354269<br>O -3.066499 4.973629 -1.541743<br>O -1.198119 3.701968 -1.812957<br>C -0.361806 4.782241 -2.410213<br>C 0.966628 4.066903 -2.662519<br>H 1.683473 4.769391 -3.098167<br>H 1.381072 3.678549 -1.728363<br>H 0.834885 3.234307 -3.359701<br>C -0.984980 5.257459 -3.725683<br>H -1.149994 4.410852 -4.399927<br>H -1.933539 5.768359 -3.557348<br>H -0.294822 5.950849 -4.217737<br>C -0.182344 5.916168 -1.397557<br>H 0.542254 6.635142 -1.793318<br>H -1.120362 6.440012 -1.208745<br>H 0.207483 5.525820 -0.452448<br>H -1.622088 -2.197169 -1.874347<br>H -3.113207 -1.669490 -2.688954<br>H -1.614889 -1.833996 -3.613162<br>C -0.125705 0.071364 -2.292876<br>H 0.287493 -0.574719 -1.513314<br>H 0.298512 -0.229325 -3.256261<br>H 0.179053 1.096940 -2.083485<br>C -2.244783 0.842233 -3.449956<br>H -1.857320 0.543410 -4.429822<br>H -3.336450 0.761450 -3.479832<br>H -1.974514 1.886880 -3.285566 |
| 20 | 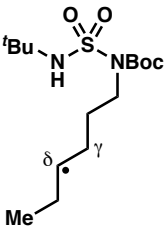 |                                                                                                                                                                                                                                                                                                                                                                                                                                                                                                                                                                                                                                                                                                                                                                                                                                                                                                                                                                                                                                                                                                                                                                                    |
|    | Atom<br>X Y Z                                                                       | Coordinates (Angstroms)<br>X Y Z                                                                                                                                                                                                                                                                                                                                                                                                                                                                                                                                                                                                                                                                                                                                                                                                                                                                                                                                                                                                                                                                                                                                                                                                                                       |

Supporting Information for Sulfamides Direct Radical-Mediated Chlorination

|  |                                 |
|--|---------------------------------|
|  | -----                           |
|  | S 0.771961 -0.603724 -0.013539  |
|  | O 0.058792 -0.991491 1.206590   |
|  | O 2.184338 -0.257518 0.020898   |
|  | N -0.112671 0.790063 -0.579785  |
|  | C -1.524813 0.936148 -0.136147  |
|  | H -1.645656 0.337100 0.765020   |
|  | H -1.657110 1.985084 0.135776   |
|  | C -2.543267 0.530844 -1.205773  |
|  | H -2.368044 1.116362 -2.115806  |
|  | H -2.406276 -0.525034 -1.470551 |
|  | N 0.542657 -1.897436 -1.026971  |
|  | H -0.377132 -2.290154 -0.846284 |
|  | C -5.021161 0.380461 -1.743433  |
|  | H -4.765967 0.486963 -2.798168  |
|  | C -6.463446 0.237677 -1.376029  |
|  | H -6.885846 1.230397 -1.127516  |
|  | H -6.550387 -0.343674 -0.445277 |
|  | C -7.325508 -0.403787 -2.472280 |
|  | H -6.980134 -1.418106 -2.700951 |
|  | H -8.374911 -0.464957 -2.165537 |
|  | H -7.281433 0.180937 -3.398380  |
|  | C 1.058778 -2.161135 -2.409642  |
|  | C 0.661272 -3.625463 -2.676659  |
|  | C 0.408130 1.852705 -1.334525   |
|  | O -0.228147 2.885272 -1.481625  |
|  | O 1.600262 1.586658 -1.870972   |
|  | C 2.411544 2.656770 -2.519324   |
|  | C 3.709235 1.923395 -2.863362   |
|  | H 4.406033 2.618604 -3.341209   |
|  | H 4.179261 1.522285 -1.961424   |
|  | H 3.519104 1.098209 -3.555798   |
|  | C 1.709964 3.148491 -3.788481   |
|  | H 1.485259 2.307794 -4.452792   |
|  | H 0.784062 3.675109 -3.555383   |
|  | H 2.377957 3.831696 -4.323466   |
|  | C 2.675750 3.782390 -1.516027   |
|  | H 3.381989 4.493387 -1.956829   |
|  | H 1.760286 4.318213 -1.261443   |
|  | H 3.123190 3.381242 -0.601457   |
|  | C -3.987650 0.749238 -0.727156  |
|  | H -4.104800 1.811878 -0.438505  |
|  | H -4.163029 0.182255 0.200489   |
|  | H 1.110973 -4.293353 -1.936273  |
|  | H -0.427226 -3.755619 -2.650832 |
|  | H 1.007339 -3.923498 -3.670654  |



|                                                                                                                                                                                                                                                                                                                                                                                                                                                                                                                                                                                                                                                                                                                                                                                                                                                                                                                                                                                                                                                                                                                                                                                                                                                                                                                                                                                                                                                                                                                                                                                                                                                                                                                                                                                                                                                                                                                                                                                                                                                                                                                                                                                                                                                                                                                                                                                                              |                         | C 2.587947 -2.030663 -2.443566<br>H 3.047860 -2.679998 -1.693456<br>H 2.946577 -2.332081 -3.433018<br>H 2.911397 -1.007104 -2.253712<br>C 0.401504 -1.245487 -3.457525<br>H 0.724487 -1.541549 -4.461353<br>H -0.690074 -1.322694 -3.417883<br>H 0.685378 -0.202371 -3.306911 |           |                         |  |  |   |   |   |       |  |  |  |   |          |          |           |   |          |          |           |   |          |           |          |   |          |           |          |   |          |          |          |   |          |          |           |   |          |          |           |   |          |          |          |   |          |          |           |   |          |          |           |   |          |          |           |   |          |          |           |   |          |          |           |   |          |          |           |   |          |          |           |   |          |          |           |   |          |          |           |   |          |          |           |   |          |           |          |   |          |          |          |   |          |           |          |   |          |           |           |   |          |           |           |   |          |           |           |   |          |           |           |   |          |           |           |   |          |           |           |   |          |           |           |   |          |           |           |
|--------------------------------------------------------------------------------------------------------------------------------------------------------------------------------------------------------------------------------------------------------------------------------------------------------------------------------------------------------------------------------------------------------------------------------------------------------------------------------------------------------------------------------------------------------------------------------------------------------------------------------------------------------------------------------------------------------------------------------------------------------------------------------------------------------------------------------------------------------------------------------------------------------------------------------------------------------------------------------------------------------------------------------------------------------------------------------------------------------------------------------------------------------------------------------------------------------------------------------------------------------------------------------------------------------------------------------------------------------------------------------------------------------------------------------------------------------------------------------------------------------------------------------------------------------------------------------------------------------------------------------------------------------------------------------------------------------------------------------------------------------------------------------------------------------------------------------------------------------------------------------------------------------------------------------------------------------------------------------------------------------------------------------------------------------------------------------------------------------------------------------------------------------------------------------------------------------------------------------------------------------------------------------------------------------------------------------------------------------------------------------------------------------------|-------------------------|-------------------------------------------------------------------------------------------------------------------------------------------------------------------------------------------------------------------------------------------------------------------------------|-----------|-------------------------|--|--|---|---|---|-------|--|--|--|---|----------|----------|-----------|---|----------|----------|-----------|---|----------|-----------|----------|---|----------|-----------|----------|---|----------|----------|----------|---|----------|----------|-----------|---|----------|----------|-----------|---|----------|----------|----------|---|----------|----------|-----------|---|----------|----------|-----------|---|----------|----------|-----------|---|----------|----------|-----------|---|----------|----------|-----------|---|----------|----------|-----------|---|----------|----------|-----------|---|----------|----------|-----------|---|----------|----------|-----------|---|----------|----------|-----------|---|----------|-----------|----------|---|----------|----------|----------|---|----------|-----------|----------|---|----------|-----------|-----------|---|----------|-----------|-----------|---|----------|-----------|-----------|---|----------|-----------|-----------|---|----------|-----------|-----------|---|----------|-----------|-----------|---|----------|-----------|-----------|---|----------|-----------|-----------|
| 21                                                                                                                                                                                                                                                                                                                                                                                                                                                                                                                                                                                                                                                                                                                                                                                                                                                                                                                                                                                                                                                                                                                                                                                                                                                                                                                                                                                                                                                                                                                                                                                                                                                                                                                                                                                                                                                                                                                                                                                                                                                                                                                                                                                                                                                                                                                                                                                                           |                         |                                                                                                                                                                                                                                                                               |           |                         |  |  |   |   |   |       |  |  |  |   |          |          |           |   |          |          |           |   |          |           |          |   |          |           |          |   |          |          |          |   |          |          |           |   |          |          |           |   |          |          |          |   |          |          |           |   |          |          |           |   |          |          |           |   |          |          |           |   |          |          |           |   |          |          |           |   |          |          |           |   |          |          |           |   |          |          |           |   |          |          |           |   |          |           |          |   |          |          |          |   |          |           |          |   |          |           |           |   |          |           |           |   |          |           |           |   |          |           |           |   |          |           |           |   |          |           |           |   |          |           |           |   |          |           |           |
| <table border="1"> <thead> <tr> <th rowspan="2">Atom</th> <th colspan="3">Coordinates (Angstroms)</th> </tr> <tr> <th>X</th> <th>Y</th> <th>Z</th> </tr> </thead> <tbody> <tr><td colspan="4">-----</td></tr> <tr><td>C</td><td>0.419216</td><td>0.204566</td><td>-0.000359</td></tr> <tr><td>N</td><td>2.841017</td><td>0.297796</td><td>-0.087539</td></tr> <tr><td>S</td><td>4.340188</td><td>-0.061405</td><td>0.645318</td></tr> <tr><td>O</td><td>4.352985</td><td>-1.436449</td><td>1.138992</td></tr> <tr><td>O</td><td>4.596634</td><td>1.047114</td><td>1.569474</td></tr> <tr><td>N</td><td>5.412955</td><td>0.131313</td><td>-0.642561</td></tr> <tr><td>C</td><td>6.349220</td><td>1.290266</td><td>-0.644141</td></tr> <tr><td>H</td><td>6.607436</td><td>1.504802</td><td>0.392922</td></tr> <tr><td>H</td><td>7.246098</td><td>0.932662</td><td>-1.152674</td></tr> <tr><td>C</td><td>5.780278</td><td>2.528367</td><td>-1.339427</td></tr> <tr><td>H</td><td>5.490206</td><td>2.263062</td><td>-2.363317</td></tr> <tr><td>H</td><td>4.871067</td><td>2.851942</td><td>-0.818519</td></tr> <tr><td>C</td><td>6.796221</td><td>3.678342</td><td>-1.370302</td></tr> <tr><td>H</td><td>7.095265</td><td>3.929046</td><td>-0.342437</td></tr> <tr><td>H</td><td>7.708457</td><td>3.344909</td><td>-1.885287</td></tr> <tr><td>C</td><td>7.265079</td><td>6.094976</td><td>-2.097282</td></tr> <tr><td>H</td><td>8.177720</td><td>5.763022</td><td>-2.611409</td></tr> <tr><td>H</td><td>7.565987</td><td>6.343939</td><td>-1.070183</td></tr> <tr><td>C</td><td>1.719624</td><td>-0.113135</td><td>0.724972</td></tr> <tr><td>H</td><td>1.712172</td><td>0.416324</td><td>1.689615</td></tr> <tr><td>H</td><td>1.749902</td><td>-1.189095</td><td>0.943699</td></tr> <tr><td>C</td><td>4.144253</td><td>-2.599638</td><td>-2.773615</td></tr> <tr><td>C</td><td>2.908077</td><td>-3.329985</td><td>-2.248479</td></tr> <tr><td>H</td><td>2.056843</td><td>-2.647404</td><td>-2.172534</td></tr> <tr><td>H</td><td>2.641840</td><td>-4.137931</td><td>-2.936286</td></tr> <tr><td>H</td><td>3.103201</td><td>-3.762916</td><td>-1.263243</td></tr> <tr><td>C</td><td>5.356676</td><td>-3.531338</td><td>-2.822813</td></tr> <tr><td>H</td><td>6.244975</td><td>-3.016401</td><td>-3.191725</td></tr> <tr><td>H</td><td>5.565538</td><td>-3.941115</td><td>-1.829839</td></tr> </tbody> </table> |                         |                                                                                                                                                                                                                                                                               | Atom      | Coordinates (Angstroms) |  |  | X | Y | Z | ----- |  |  |  | C | 0.419216 | 0.204566 | -0.000359 | N | 2.841017 | 0.297796 | -0.087539 | S | 4.340188 | -0.061405 | 0.645318 | O | 4.352985 | -1.436449 | 1.138992 | O | 4.596634 | 1.047114 | 1.569474 | N | 5.412955 | 0.131313 | -0.642561 | C | 6.349220 | 1.290266 | -0.644141 | H | 6.607436 | 1.504802 | 0.392922 | H | 7.246098 | 0.932662 | -1.152674 | C | 5.780278 | 2.528367 | -1.339427 | H | 5.490206 | 2.263062 | -2.363317 | H | 4.871067 | 2.851942 | -0.818519 | C | 6.796221 | 3.678342 | -1.370302 | H | 7.095265 | 3.929046 | -0.342437 | H | 7.708457 | 3.344909 | -1.885287 | C | 7.265079 | 6.094976 | -2.097282 | H | 8.177720 | 5.763022 | -2.611409 | H | 7.565987 | 6.343939 | -1.070183 | C | 1.719624 | -0.113135 | 0.724972 | H | 1.712172 | 0.416324 | 1.689615 | H | 1.749902 | -1.189095 | 0.943699 | C | 4.144253 | -2.599638 | -2.773615 | C | 2.908077 | -3.329985 | -2.248479 | H | 2.056843 | -2.647404 | -2.172534 | H | 2.641840 | -4.137931 | -2.936286 | H | 3.103201 | -3.762916 | -1.263243 | C | 5.356676 | -3.531338 | -2.822813 | H | 6.244975 | -3.016401 | -3.191725 | H | 5.565538 | -3.941115 | -1.829839 |
| Atom                                                                                                                                                                                                                                                                                                                                                                                                                                                                                                                                                                                                                                                                                                                                                                                                                                                                                                                                                                                                                                                                                                                                                                                                                                                                                                                                                                                                                                                                                                                                                                                                                                                                                                                                                                                                                                                                                                                                                                                                                                                                                                                                                                                                                                                                                                                                                                                                         | Coordinates (Angstroms) |                                                                                                                                                                                                                                                                               |           |                         |  |  |   |   |   |       |  |  |  |   |          |          |           |   |          |          |           |   |          |           |          |   |          |           |          |   |          |          |          |   |          |          |           |   |          |          |           |   |          |          |          |   |          |          |           |   |          |          |           |   |          |          |           |   |          |          |           |   |          |          |           |   |          |          |           |   |          |          |           |   |          |          |           |   |          |          |           |   |          |          |           |   |          |           |          |   |          |          |          |   |          |           |          |   |          |           |           |   |          |           |           |   |          |           |           |   |          |           |           |   |          |           |           |   |          |           |           |   |          |           |           |   |          |           |           |
|                                                                                                                                                                                                                                                                                                                                                                                                                                                                                                                                                                                                                                                                                                                                                                                                                                                                                                                                                                                                                                                                                                                                                                                                                                                                                                                                                                                                                                                                                                                                                                                                                                                                                                                                                                                                                                                                                                                                                                                                                                                                                                                                                                                                                                                                                                                                                                                                              | X                       | Y                                                                                                                                                                                                                                                                             | Z         |                         |  |  |   |   |   |       |  |  |  |   |          |          |           |   |          |          |           |   |          |           |          |   |          |           |          |   |          |          |          |   |          |          |           |   |          |          |           |   |          |          |          |   |          |          |           |   |          |          |           |   |          |          |           |   |          |          |           |   |          |          |           |   |          |          |           |   |          |          |           |   |          |          |           |   |          |          |           |   |          |          |           |   |          |           |          |   |          |          |          |   |          |           |          |   |          |           |           |   |          |           |           |   |          |           |           |   |          |           |           |   |          |           |           |   |          |           |           |   |          |           |           |   |          |           |           |
| -----                                                                                                                                                                                                                                                                                                                                                                                                                                                                                                                                                                                                                                                                                                                                                                                                                                                                                                                                                                                                                                                                                                                                                                                                                                                                                                                                                                                                                                                                                                                                                                                                                                                                                                                                                                                                                                                                                                                                                                                                                                                                                                                                                                                                                                                                                                                                                                                                        |                         |                                                                                                                                                                                                                                                                               |           |                         |  |  |   |   |   |       |  |  |  |   |          |          |           |   |          |          |           |   |          |           |          |   |          |           |          |   |          |          |          |   |          |          |           |   |          |          |           |   |          |          |          |   |          |          |           |   |          |          |           |   |          |          |           |   |          |          |           |   |          |          |           |   |          |          |           |   |          |          |           |   |          |          |           |   |          |          |           |   |          |          |           |   |          |           |          |   |          |          |          |   |          |           |          |   |          |           |           |   |          |           |           |   |          |           |           |   |          |           |           |   |          |           |           |   |          |           |           |   |          |           |           |   |          |           |           |
| C                                                                                                                                                                                                                                                                                                                                                                                                                                                                                                                                                                                                                                                                                                                                                                                                                                                                                                                                                                                                                                                                                                                                                                                                                                                                                                                                                                                                                                                                                                                                                                                                                                                                                                                                                                                                                                                                                                                                                                                                                                                                                                                                                                                                                                                                                                                                                                                                            | 0.419216                | 0.204566                                                                                                                                                                                                                                                                      | -0.000359 |                         |  |  |   |   |   |       |  |  |  |   |          |          |           |   |          |          |           |   |          |           |          |   |          |           |          |   |          |          |          |   |          |          |           |   |          |          |           |   |          |          |          |   |          |          |           |   |          |          |           |   |          |          |           |   |          |          |           |   |          |          |           |   |          |          |           |   |          |          |           |   |          |          |           |   |          |          |           |   |          |          |           |   |          |           |          |   |          |          |          |   |          |           |          |   |          |           |           |   |          |           |           |   |          |           |           |   |          |           |           |   |          |           |           |   |          |           |           |   |          |           |           |   |          |           |           |
| N                                                                                                                                                                                                                                                                                                                                                                                                                                                                                                                                                                                                                                                                                                                                                                                                                                                                                                                                                                                                                                                                                                                                                                                                                                                                                                                                                                                                                                                                                                                                                                                                                                                                                                                                                                                                                                                                                                                                                                                                                                                                                                                                                                                                                                                                                                                                                                                                            | 2.841017                | 0.297796                                                                                                                                                                                                                                                                      | -0.087539 |                         |  |  |   |   |   |       |  |  |  |   |          |          |           |   |          |          |           |   |          |           |          |   |          |           |          |   |          |          |          |   |          |          |           |   |          |          |           |   |          |          |          |   |          |          |           |   |          |          |           |   |          |          |           |   |          |          |           |   |          |          |           |   |          |          |           |   |          |          |           |   |          |          |           |   |          |          |           |   |          |          |           |   |          |           |          |   |          |          |          |   |          |           |          |   |          |           |           |   |          |           |           |   |          |           |           |   |          |           |           |   |          |           |           |   |          |           |           |   |          |           |           |   |          |           |           |
| S                                                                                                                                                                                                                                                                                                                                                                                                                                                                                                                                                                                                                                                                                                                                                                                                                                                                                                                                                                                                                                                                                                                                                                                                                                                                                                                                                                                                                                                                                                                                                                                                                                                                                                                                                                                                                                                                                                                                                                                                                                                                                                                                                                                                                                                                                                                                                                                                            | 4.340188                | -0.061405                                                                                                                                                                                                                                                                     | 0.645318  |                         |  |  |   |   |   |       |  |  |  |   |          |          |           |   |          |          |           |   |          |           |          |   |          |           |          |   |          |          |          |   |          |          |           |   |          |          |           |   |          |          |          |   |          |          |           |   |          |          |           |   |          |          |           |   |          |          |           |   |          |          |           |   |          |          |           |   |          |          |           |   |          |          |           |   |          |          |           |   |          |          |           |   |          |           |          |   |          |          |          |   |          |           |          |   |          |           |           |   |          |           |           |   |          |           |           |   |          |           |           |   |          |           |           |   |          |           |           |   |          |           |           |   |          |           |           |
| O                                                                                                                                                                                                                                                                                                                                                                                                                                                                                                                                                                                                                                                                                                                                                                                                                                                                                                                                                                                                                                                                                                                                                                                                                                                                                                                                                                                                                                                                                                                                                                                                                                                                                                                                                                                                                                                                                                                                                                                                                                                                                                                                                                                                                                                                                                                                                                                                            | 4.352985                | -1.436449                                                                                                                                                                                                                                                                     | 1.138992  |                         |  |  |   |   |   |       |  |  |  |   |          |          |           |   |          |          |           |   |          |           |          |   |          |           |          |   |          |          |          |   |          |          |           |   |          |          |           |   |          |          |          |   |          |          |           |   |          |          |           |   |          |          |           |   |          |          |           |   |          |          |           |   |          |          |           |   |          |          |           |   |          |          |           |   |          |          |           |   |          |          |           |   |          |           |          |   |          |          |          |   |          |           |          |   |          |           |           |   |          |           |           |   |          |           |           |   |          |           |           |   |          |           |           |   |          |           |           |   |          |           |           |   |          |           |           |
| O                                                                                                                                                                                                                                                                                                                                                                                                                                                                                                                                                                                                                                                                                                                                                                                                                                                                                                                                                                                                                                                                                                                                                                                                                                                                                                                                                                                                                                                                                                                                                                                                                                                                                                                                                                                                                                                                                                                                                                                                                                                                                                                                                                                                                                                                                                                                                                                                            | 4.596634                | 1.047114                                                                                                                                                                                                                                                                      | 1.569474  |                         |  |  |   |   |   |       |  |  |  |   |          |          |           |   |          |          |           |   |          |           |          |   |          |           |          |   |          |          |          |   |          |          |           |   |          |          |           |   |          |          |          |   |          |          |           |   |          |          |           |   |          |          |           |   |          |          |           |   |          |          |           |   |          |          |           |   |          |          |           |   |          |          |           |   |          |          |           |   |          |          |           |   |          |           |          |   |          |          |          |   |          |           |          |   |          |           |           |   |          |           |           |   |          |           |           |   |          |           |           |   |          |           |           |   |          |           |           |   |          |           |           |   |          |           |           |
| N                                                                                                                                                                                                                                                                                                                                                                                                                                                                                                                                                                                                                                                                                                                                                                                                                                                                                                                                                                                                                                                                                                                                                                                                                                                                                                                                                                                                                                                                                                                                                                                                                                                                                                                                                                                                                                                                                                                                                                                                                                                                                                                                                                                                                                                                                                                                                                                                            | 5.412955                | 0.131313                                                                                                                                                                                                                                                                      | -0.642561 |                         |  |  |   |   |   |       |  |  |  |   |          |          |           |   |          |          |           |   |          |           |          |   |          |           |          |   |          |          |          |   |          |          |           |   |          |          |           |   |          |          |          |   |          |          |           |   |          |          |           |   |          |          |           |   |          |          |           |   |          |          |           |   |          |          |           |   |          |          |           |   |          |          |           |   |          |          |           |   |          |          |           |   |          |           |          |   |          |          |          |   |          |           |          |   |          |           |           |   |          |           |           |   |          |           |           |   |          |           |           |   |          |           |           |   |          |           |           |   |          |           |           |   |          |           |           |
| C                                                                                                                                                                                                                                                                                                                                                                                                                                                                                                                                                                                                                                                                                                                                                                                                                                                                                                                                                                                                                                                                                                                                                                                                                                                                                                                                                                                                                                                                                                                                                                                                                                                                                                                                                                                                                                                                                                                                                                                                                                                                                                                                                                                                                                                                                                                                                                                                            | 6.349220                | 1.290266                                                                                                                                                                                                                                                                      | -0.644141 |                         |  |  |   |   |   |       |  |  |  |   |          |          |           |   |          |          |           |   |          |           |          |   |          |           |          |   |          |          |          |   |          |          |           |   |          |          |           |   |          |          |          |   |          |          |           |   |          |          |           |   |          |          |           |   |          |          |           |   |          |          |           |   |          |          |           |   |          |          |           |   |          |          |           |   |          |          |           |   |          |          |           |   |          |           |          |   |          |          |          |   |          |           |          |   |          |           |           |   |          |           |           |   |          |           |           |   |          |           |           |   |          |           |           |   |          |           |           |   |          |           |           |   |          |           |           |
| H                                                                                                                                                                                                                                                                                                                                                                                                                                                                                                                                                                                                                                                                                                                                                                                                                                                                                                                                                                                                                                                                                                                                                                                                                                                                                                                                                                                                                                                                                                                                                                                                                                                                                                                                                                                                                                                                                                                                                                                                                                                                                                                                                                                                                                                                                                                                                                                                            | 6.607436                | 1.504802                                                                                                                                                                                                                                                                      | 0.392922  |                         |  |  |   |   |   |       |  |  |  |   |          |          |           |   |          |          |           |   |          |           |          |   |          |           |          |   |          |          |          |   |          |          |           |   |          |          |           |   |          |          |          |   |          |          |           |   |          |          |           |   |          |          |           |   |          |          |           |   |          |          |           |   |          |          |           |   |          |          |           |   |          |          |           |   |          |          |           |   |          |          |           |   |          |           |          |   |          |          |          |   |          |           |          |   |          |           |           |   |          |           |           |   |          |           |           |   |          |           |           |   |          |           |           |   |          |           |           |   |          |           |           |   |          |           |           |
| H                                                                                                                                                                                                                                                                                                                                                                                                                                                                                                                                                                                                                                                                                                                                                                                                                                                                                                                                                                                                                                                                                                                                                                                                                                                                                                                                                                                                                                                                                                                                                                                                                                                                                                                                                                                                                                                                                                                                                                                                                                                                                                                                                                                                                                                                                                                                                                                                            | 7.246098                | 0.932662                                                                                                                                                                                                                                                                      | -1.152674 |                         |  |  |   |   |   |       |  |  |  |   |          |          |           |   |          |          |           |   |          |           |          |   |          |           |          |   |          |          |          |   |          |          |           |   |          |          |           |   |          |          |          |   |          |          |           |   |          |          |           |   |          |          |           |   |          |          |           |   |          |          |           |   |          |          |           |   |          |          |           |   |          |          |           |   |          |          |           |   |          |          |           |   |          |           |          |   |          |          |          |   |          |           |          |   |          |           |           |   |          |           |           |   |          |           |           |   |          |           |           |   |          |           |           |   |          |           |           |   |          |           |           |   |          |           |           |
| C                                                                                                                                                                                                                                                                                                                                                                                                                                                                                                                                                                                                                                                                                                                                                                                                                                                                                                                                                                                                                                                                                                                                                                                                                                                                                                                                                                                                                                                                                                                                                                                                                                                                                                                                                                                                                                                                                                                                                                                                                                                                                                                                                                                                                                                                                                                                                                                                            | 5.780278                | 2.528367                                                                                                                                                                                                                                                                      | -1.339427 |                         |  |  |   |   |   |       |  |  |  |   |          |          |           |   |          |          |           |   |          |           |          |   |          |           |          |   |          |          |          |   |          |          |           |   |          |          |           |   |          |          |          |   |          |          |           |   |          |          |           |   |          |          |           |   |          |          |           |   |          |          |           |   |          |          |           |   |          |          |           |   |          |          |           |   |          |          |           |   |          |          |           |   |          |           |          |   |          |          |          |   |          |           |          |   |          |           |           |   |          |           |           |   |          |           |           |   |          |           |           |   |          |           |           |   |          |           |           |   |          |           |           |   |          |           |           |
| H                                                                                                                                                                                                                                                                                                                                                                                                                                                                                                                                                                                                                                                                                                                                                                                                                                                                                                                                                                                                                                                                                                                                                                                                                                                                                                                                                                                                                                                                                                                                                                                                                                                                                                                                                                                                                                                                                                                                                                                                                                                                                                                                                                                                                                                                                                                                                                                                            | 5.490206                | 2.263062                                                                                                                                                                                                                                                                      | -2.363317 |                         |  |  |   |   |   |       |  |  |  |   |          |          |           |   |          |          |           |   |          |           |          |   |          |           |          |   |          |          |          |   |          |          |           |   |          |          |           |   |          |          |          |   |          |          |           |   |          |          |           |   |          |          |           |   |          |          |           |   |          |          |           |   |          |          |           |   |          |          |           |   |          |          |           |   |          |          |           |   |          |          |           |   |          |           |          |   |          |          |          |   |          |           |          |   |          |           |           |   |          |           |           |   |          |           |           |   |          |           |           |   |          |           |           |   |          |           |           |   |          |           |           |   |          |           |           |
| H                                                                                                                                                                                                                                                                                                                                                                                                                                                                                                                                                                                                                                                                                                                                                                                                                                                                                                                                                                                                                                                                                                                                                                                                                                                                                                                                                                                                                                                                                                                                                                                                                                                                                                                                                                                                                                                                                                                                                                                                                                                                                                                                                                                                                                                                                                                                                                                                            | 4.871067                | 2.851942                                                                                                                                                                                                                                                                      | -0.818519 |                         |  |  |   |   |   |       |  |  |  |   |          |          |           |   |          |          |           |   |          |           |          |   |          |           |          |   |          |          |          |   |          |          |           |   |          |          |           |   |          |          |          |   |          |          |           |   |          |          |           |   |          |          |           |   |          |          |           |   |          |          |           |   |          |          |           |   |          |          |           |   |          |          |           |   |          |          |           |   |          |          |           |   |          |           |          |   |          |          |          |   |          |           |          |   |          |           |           |   |          |           |           |   |          |           |           |   |          |           |           |   |          |           |           |   |          |           |           |   |          |           |           |   |          |           |           |
| C                                                                                                                                                                                                                                                                                                                                                                                                                                                                                                                                                                                                                                                                                                                                                                                                                                                                                                                                                                                                                                                                                                                                                                                                                                                                                                                                                                                                                                                                                                                                                                                                                                                                                                                                                                                                                                                                                                                                                                                                                                                                                                                                                                                                                                                                                                                                                                                                            | 6.796221                | 3.678342                                                                                                                                                                                                                                                                      | -1.370302 |                         |  |  |   |   |   |       |  |  |  |   |          |          |           |   |          |          |           |   |          |           |          |   |          |           |          |   |          |          |          |   |          |          |           |   |          |          |           |   |          |          |          |   |          |          |           |   |          |          |           |   |          |          |           |   |          |          |           |   |          |          |           |   |          |          |           |   |          |          |           |   |          |          |           |   |          |          |           |   |          |          |           |   |          |           |          |   |          |          |          |   |          |           |          |   |          |           |           |   |          |           |           |   |          |           |           |   |          |           |           |   |          |           |           |   |          |           |           |   |          |           |           |   |          |           |           |
| H                                                                                                                                                                                                                                                                                                                                                                                                                                                                                                                                                                                                                                                                                                                                                                                                                                                                                                                                                                                                                                                                                                                                                                                                                                                                                                                                                                                                                                                                                                                                                                                                                                                                                                                                                                                                                                                                                                                                                                                                                                                                                                                                                                                                                                                                                                                                                                                                            | 7.095265                | 3.929046                                                                                                                                                                                                                                                                      | -0.342437 |                         |  |  |   |   |   |       |  |  |  |   |          |          |           |   |          |          |           |   |          |           |          |   |          |           |          |   |          |          |          |   |          |          |           |   |          |          |           |   |          |          |          |   |          |          |           |   |          |          |           |   |          |          |           |   |          |          |           |   |          |          |           |   |          |          |           |   |          |          |           |   |          |          |           |   |          |          |           |   |          |          |           |   |          |           |          |   |          |          |          |   |          |           |          |   |          |           |           |   |          |           |           |   |          |           |           |   |          |           |           |   |          |           |           |   |          |           |           |   |          |           |           |   |          |           |           |
| H                                                                                                                                                                                                                                                                                                                                                                                                                                                                                                                                                                                                                                                                                                                                                                                                                                                                                                                                                                                                                                                                                                                                                                                                                                                                                                                                                                                                                                                                                                                                                                                                                                                                                                                                                                                                                                                                                                                                                                                                                                                                                                                                                                                                                                                                                                                                                                                                            | 7.708457                | 3.344909                                                                                                                                                                                                                                                                      | -1.885287 |                         |  |  |   |   |   |       |  |  |  |   |          |          |           |   |          |          |           |   |          |           |          |   |          |           |          |   |          |          |          |   |          |          |           |   |          |          |           |   |          |          |          |   |          |          |           |   |          |          |           |   |          |          |           |   |          |          |           |   |          |          |           |   |          |          |           |   |          |          |           |   |          |          |           |   |          |          |           |   |          |          |           |   |          |           |          |   |          |          |          |   |          |           |          |   |          |           |           |   |          |           |           |   |          |           |           |   |          |           |           |   |          |           |           |   |          |           |           |   |          |           |           |   |          |           |           |
| C                                                                                                                                                                                                                                                                                                                                                                                                                                                                                                                                                                                                                                                                                                                                                                                                                                                                                                                                                                                                                                                                                                                                                                                                                                                                                                                                                                                                                                                                                                                                                                                                                                                                                                                                                                                                                                                                                                                                                                                                                                                                                                                                                                                                                                                                                                                                                                                                            | 7.265079                | 6.094976                                                                                                                                                                                                                                                                      | -2.097282 |                         |  |  |   |   |   |       |  |  |  |   |          |          |           |   |          |          |           |   |          |           |          |   |          |           |          |   |          |          |          |   |          |          |           |   |          |          |           |   |          |          |          |   |          |          |           |   |          |          |           |   |          |          |           |   |          |          |           |   |          |          |           |   |          |          |           |   |          |          |           |   |          |          |           |   |          |          |           |   |          |          |           |   |          |           |          |   |          |          |          |   |          |           |          |   |          |           |           |   |          |           |           |   |          |           |           |   |          |           |           |   |          |           |           |   |          |           |           |   |          |           |           |   |          |           |           |
| H                                                                                                                                                                                                                                                                                                                                                                                                                                                                                                                                                                                                                                                                                                                                                                                                                                                                                                                                                                                                                                                                                                                                                                                                                                                                                                                                                                                                                                                                                                                                                                                                                                                                                                                                                                                                                                                                                                                                                                                                                                                                                                                                                                                                                                                                                                                                                                                                            | 8.177720                | 5.763022                                                                                                                                                                                                                                                                      | -2.611409 |                         |  |  |   |   |   |       |  |  |  |   |          |          |           |   |          |          |           |   |          |           |          |   |          |           |          |   |          |          |          |   |          |          |           |   |          |          |           |   |          |          |          |   |          |          |           |   |          |          |           |   |          |          |           |   |          |          |           |   |          |          |           |   |          |          |           |   |          |          |           |   |          |          |           |   |          |          |           |   |          |          |           |   |          |           |          |   |          |          |          |   |          |           |          |   |          |           |           |   |          |           |           |   |          |           |           |   |          |           |           |   |          |           |           |   |          |           |           |   |          |           |           |   |          |           |           |
| H                                                                                                                                                                                                                                                                                                                                                                                                                                                                                                                                                                                                                                                                                                                                                                                                                                                                                                                                                                                                                                                                                                                                                                                                                                                                                                                                                                                                                                                                                                                                                                                                                                                                                                                                                                                                                                                                                                                                                                                                                                                                                                                                                                                                                                                                                                                                                                                                            | 7.565987                | 6.343939                                                                                                                                                                                                                                                                      | -1.070183 |                         |  |  |   |   |   |       |  |  |  |   |          |          |           |   |          |          |           |   |          |           |          |   |          |           |          |   |          |          |          |   |          |          |           |   |          |          |           |   |          |          |          |   |          |          |           |   |          |          |           |   |          |          |           |   |          |          |           |   |          |          |           |   |          |          |           |   |          |          |           |   |          |          |           |   |          |          |           |   |          |          |           |   |          |           |          |   |          |          |          |   |          |           |          |   |          |           |           |   |          |           |           |   |          |           |           |   |          |           |           |   |          |           |           |   |          |           |           |   |          |           |           |   |          |           |           |
| C                                                                                                                                                                                                                                                                                                                                                                                                                                                                                                                                                                                                                                                                                                                                                                                                                                                                                                                                                                                                                                                                                                                                                                                                                                                                                                                                                                                                                                                                                                                                                                                                                                                                                                                                                                                                                                                                                                                                                                                                                                                                                                                                                                                                                                                                                                                                                                                                            | 1.719624                | -0.113135                                                                                                                                                                                                                                                                     | 0.724972  |                         |  |  |   |   |   |       |  |  |  |   |          |          |           |   |          |          |           |   |          |           |          |   |          |           |          |   |          |          |          |   |          |          |           |   |          |          |           |   |          |          |          |   |          |          |           |   |          |          |           |   |          |          |           |   |          |          |           |   |          |          |           |   |          |          |           |   |          |          |           |   |          |          |           |   |          |          |           |   |          |          |           |   |          |           |          |   |          |          |          |   |          |           |          |   |          |           |           |   |          |           |           |   |          |           |           |   |          |           |           |   |          |           |           |   |          |           |           |   |          |           |           |   |          |           |           |
| H                                                                                                                                                                                                                                                                                                                                                                                                                                                                                                                                                                                                                                                                                                                                                                                                                                                                                                                                                                                                                                                                                                                                                                                                                                                                                                                                                                                                                                                                                                                                                                                                                                                                                                                                                                                                                                                                                                                                                                                                                                                                                                                                                                                                                                                                                                                                                                                                            | 1.712172                | 0.416324                                                                                                                                                                                                                                                                      | 1.689615  |                         |  |  |   |   |   |       |  |  |  |   |          |          |           |   |          |          |           |   |          |           |          |   |          |           |          |   |          |          |          |   |          |          |           |   |          |          |           |   |          |          |          |   |          |          |           |   |          |          |           |   |          |          |           |   |          |          |           |   |          |          |           |   |          |          |           |   |          |          |           |   |          |          |           |   |          |          |           |   |          |          |           |   |          |           |          |   |          |          |          |   |          |           |          |   |          |           |           |   |          |           |           |   |          |           |           |   |          |           |           |   |          |           |           |   |          |           |           |   |          |           |           |   |          |           |           |
| H                                                                                                                                                                                                                                                                                                                                                                                                                                                                                                                                                                                                                                                                                                                                                                                                                                                                                                                                                                                                                                                                                                                                                                                                                                                                                                                                                                                                                                                                                                                                                                                                                                                                                                                                                                                                                                                                                                                                                                                                                                                                                                                                                                                                                                                                                                                                                                                                            | 1.749902                | -1.189095                                                                                                                                                                                                                                                                     | 0.943699  |                         |  |  |   |   |   |       |  |  |  |   |          |          |           |   |          |          |           |   |          |           |          |   |          |           |          |   |          |          |          |   |          |          |           |   |          |          |           |   |          |          |          |   |          |          |           |   |          |          |           |   |          |          |           |   |          |          |           |   |          |          |           |   |          |          |           |   |          |          |           |   |          |          |           |   |          |          |           |   |          |          |           |   |          |           |          |   |          |          |          |   |          |           |          |   |          |           |           |   |          |           |           |   |          |           |           |   |          |           |           |   |          |           |           |   |          |           |           |   |          |           |           |   |          |           |           |
| C                                                                                                                                                                                                                                                                                                                                                                                                                                                                                                                                                                                                                                                                                                                                                                                                                                                                                                                                                                                                                                                                                                                                                                                                                                                                                                                                                                                                                                                                                                                                                                                                                                                                                                                                                                                                                                                                                                                                                                                                                                                                                                                                                                                                                                                                                                                                                                                                            | 4.144253                | -2.599638                                                                                                                                                                                                                                                                     | -2.773615 |                         |  |  |   |   |   |       |  |  |  |   |          |          |           |   |          |          |           |   |          |           |          |   |          |           |          |   |          |          |          |   |          |          |           |   |          |          |           |   |          |          |          |   |          |          |           |   |          |          |           |   |          |          |           |   |          |          |           |   |          |          |           |   |          |          |           |   |          |          |           |   |          |          |           |   |          |          |           |   |          |          |           |   |          |           |          |   |          |          |          |   |          |           |          |   |          |           |           |   |          |           |           |   |          |           |           |   |          |           |           |   |          |           |           |   |          |           |           |   |          |           |           |   |          |           |           |
| C                                                                                                                                                                                                                                                                                                                                                                                                                                                                                                                                                                                                                                                                                                                                                                                                                                                                                                                                                                                                                                                                                                                                                                                                                                                                                                                                                                                                                                                                                                                                                                                                                                                                                                                                                                                                                                                                                                                                                                                                                                                                                                                                                                                                                                                                                                                                                                                                            | 2.908077                | -3.329985                                                                                                                                                                                                                                                                     | -2.248479 |                         |  |  |   |   |   |       |  |  |  |   |          |          |           |   |          |          |           |   |          |           |          |   |          |           |          |   |          |          |          |   |          |          |           |   |          |          |           |   |          |          |          |   |          |          |           |   |          |          |           |   |          |          |           |   |          |          |           |   |          |          |           |   |          |          |           |   |          |          |           |   |          |          |           |   |          |          |           |   |          |          |           |   |          |           |          |   |          |          |          |   |          |           |          |   |          |           |           |   |          |           |           |   |          |           |           |   |          |           |           |   |          |           |           |   |          |           |           |   |          |           |           |   |          |           |           |
| H                                                                                                                                                                                                                                                                                                                                                                                                                                                                                                                                                                                                                                                                                                                                                                                                                                                                                                                                                                                                                                                                                                                                                                                                                                                                                                                                                                                                                                                                                                                                                                                                                                                                                                                                                                                                                                                                                                                                                                                                                                                                                                                                                                                                                                                                                                                                                                                                            | 2.056843                | -2.647404                                                                                                                                                                                                                                                                     | -2.172534 |                         |  |  |   |   |   |       |  |  |  |   |          |          |           |   |          |          |           |   |          |           |          |   |          |           |          |   |          |          |          |   |          |          |           |   |          |          |           |   |          |          |          |   |          |          |           |   |          |          |           |   |          |          |           |   |          |          |           |   |          |          |           |   |          |          |           |   |          |          |           |   |          |          |           |   |          |          |           |   |          |          |           |   |          |           |          |   |          |          |          |   |          |           |          |   |          |           |           |   |          |           |           |   |          |           |           |   |          |           |           |   |          |           |           |   |          |           |           |   |          |           |           |   |          |           |           |
| H                                                                                                                                                                                                                                                                                                                                                                                                                                                                                                                                                                                                                                                                                                                                                                                                                                                                                                                                                                                                                                                                                                                                                                                                                                                                                                                                                                                                                                                                                                                                                                                                                                                                                                                                                                                                                                                                                                                                                                                                                                                                                                                                                                                                                                                                                                                                                                                                            | 2.641840                | -4.137931                                                                                                                                                                                                                                                                     | -2.936286 |                         |  |  |   |   |   |       |  |  |  |   |          |          |           |   |          |          |           |   |          |           |          |   |          |           |          |   |          |          |          |   |          |          |           |   |          |          |           |   |          |          |          |   |          |          |           |   |          |          |           |   |          |          |           |   |          |          |           |   |          |          |           |   |          |          |           |   |          |          |           |   |          |          |           |   |          |          |           |   |          |          |           |   |          |           |          |   |          |          |          |   |          |           |          |   |          |           |           |   |          |           |           |   |          |           |           |   |          |           |           |   |          |           |           |   |          |           |           |   |          |           |           |   |          |           |           |
| H                                                                                                                                                                                                                                                                                                                                                                                                                                                                                                                                                                                                                                                                                                                                                                                                                                                                                                                                                                                                                                                                                                                                                                                                                                                                                                                                                                                                                                                                                                                                                                                                                                                                                                                                                                                                                                                                                                                                                                                                                                                                                                                                                                                                                                                                                                                                                                                                            | 3.103201                | -3.762916                                                                                                                                                                                                                                                                     | -1.263243 |                         |  |  |   |   |   |       |  |  |  |   |          |          |           |   |          |          |           |   |          |           |          |   |          |           |          |   |          |          |          |   |          |          |           |   |          |          |           |   |          |          |          |   |          |          |           |   |          |          |           |   |          |          |           |   |          |          |           |   |          |          |           |   |          |          |           |   |          |          |           |   |          |          |           |   |          |          |           |   |          |          |           |   |          |           |          |   |          |          |          |   |          |           |          |   |          |           |           |   |          |           |           |   |          |           |           |   |          |           |           |   |          |           |           |   |          |           |           |   |          |           |           |   |          |           |           |
| C                                                                                                                                                                                                                                                                                                                                                                                                                                                                                                                                                                                                                                                                                                                                                                                                                                                                                                                                                                                                                                                                                                                                                                                                                                                                                                                                                                                                                                                                                                                                                                                                                                                                                                                                                                                                                                                                                                                                                                                                                                                                                                                                                                                                                                                                                                                                                                                                            | 5.356676                | -3.531338                                                                                                                                                                                                                                                                     | -2.822813 |                         |  |  |   |   |   |       |  |  |  |   |          |          |           |   |          |          |           |   |          |           |          |   |          |           |          |   |          |          |          |   |          |          |           |   |          |          |           |   |          |          |          |   |          |          |           |   |          |          |           |   |          |          |           |   |          |          |           |   |          |          |           |   |          |          |           |   |          |          |           |   |          |          |           |   |          |          |           |   |          |          |           |   |          |           |          |   |          |          |          |   |          |           |          |   |          |           |           |   |          |           |           |   |          |           |           |   |          |           |           |   |          |           |           |   |          |           |           |   |          |           |           |   |          |           |           |
| H                                                                                                                                                                                                                                                                                                                                                                                                                                                                                                                                                                                                                                                                                                                                                                                                                                                                                                                                                                                                                                                                                                                                                                                                                                                                                                                                                                                                                                                                                                                                                                                                                                                                                                                                                                                                                                                                                                                                                                                                                                                                                                                                                                                                                                                                                                                                                                                                            | 6.244975                | -3.016401                                                                                                                                                                                                                                                                     | -3.191725 |                         |  |  |   |   |   |       |  |  |  |   |          |          |           |   |          |          |           |   |          |           |          |   |          |           |          |   |          |          |          |   |          |          |           |   |          |          |           |   |          |          |          |   |          |          |           |   |          |          |           |   |          |          |           |   |          |          |           |   |          |          |           |   |          |          |           |   |          |          |           |   |          |          |           |   |          |          |           |   |          |          |           |   |          |           |          |   |          |          |          |   |          |           |          |   |          |           |           |   |          |           |           |   |          |           |           |   |          |           |           |   |          |           |           |   |          |           |           |   |          |           |           |   |          |           |           |
| H                                                                                                                                                                                                                                                                                                                                                                                                                                                                                                                                                                                                                                                                                                                                                                                                                                                                                                                                                                                                                                                                                                                                                                                                                                                                                                                                                                                                                                                                                                                                                                                                                                                                                                                                                                                                                                                                                                                                                                                                                                                                                                                                                                                                                                                                                                                                                                                                            | 5.565538                | -3.941115                                                                                                                                                                                                                                                                     | -1.829839 |                         |  |  |   |   |   |       |  |  |  |   |          |          |           |   |          |          |           |   |          |           |          |   |          |           |          |   |          |          |          |   |          |          |           |   |          |          |           |   |          |          |          |   |          |          |           |   |          |          |           |   |          |          |           |   |          |          |           |   |          |          |           |   |          |          |           |   |          |          |           |   |          |          |           |   |          |          |           |   |          |          |           |   |          |           |          |   |          |          |          |   |          |           |          |   |          |           |           |   |          |           |           |   |          |           |           |   |          |           |           |   |          |           |           |   |          |           |           |   |          |           |           |   |          |           |           |

|    |  |      |                         |           |           |
|----|--|------|-------------------------|-----------|-----------|
|    |  | H    | 5.135834                | -4.366266 | -3.495510 |
|    |  | C    | 3.857212                | -1.920614 | -4.113966 |
|    |  | H    | 3.027425                | -1.214024 | -4.015464 |
|    |  | H    | 4.733448                | -1.392529 | -4.492356 |
|    |  | H    | 3.568508                | -2.683731 | -4.843979 |
|    |  | C    | 5.380948                | -0.700884 | -1.782138 |
|    |  | O    | 6.202672                | -0.584301 | -2.670849 |
|    |  | O    | 4.364304                | -1.557009 | -1.724096 |
|    |  | F    | -0.634573               | -0.174850 | 0.762926  |
|    |  | F    | 0.284473                | 1.523058  | -0.255738 |
|    |  | F    | 0.323525                | -0.450232 | -1.179497 |
|    |  | C    | 6.257560                | 4.938299  | -2.061143 |
|    |  | H    | 5.343811                | 5.270370  | -1.547530 |
|    |  | H    | 5.957528                | 4.687580  | -3.088829 |
|    |  | C    | 6.719115                | 7.350517  | -2.787139 |
|    |  | H    | 5.825329                | 7.726339  | -2.274939 |
|    |  | H    | 7.461209                | 8.156263  | -2.796237 |
|    |  | H    | 6.441390                | 7.141476  | -3.827156 |
| 22 |  |      |                         |           |           |
|    |  | Atom | Coordinates (Angstroms) |           |           |
|    |  |      | X                       | Y         | Z         |
|    |  |      | -----                   |           |           |
|    |  | C    | 0.358489                | -1.635747 | -0.506803 |
|    |  | C    | -0.863549               | -0.687880 | -0.538029 |
|    |  | H    | 0.118389                | -2.517227 | 0.091510  |
|    |  | H    | 1.156230                | -1.104542 | 0.034194  |
|    |  | H    | -1.382791               | -0.732952 | 0.421554  |
|    |  | H    | -0.560409               | 0.343545  | -0.708583 |
|    |  | S    | -2.418632               | -2.554632 | -1.778275 |
|    |  | O    | -3.753675               | -2.616797 | -2.362495 |
|    |  | O    | -2.213666               | -3.161705 | -0.456600 |
|    |  | N    | -1.301759               | -3.124232 | -2.915104 |
|    |  | C    | 2.796753                | -0.509576 | -2.463156 |
|    |  | H    | 2.745314                | -0.033581 | -1.475937 |
|    |  | H    | 3.499894                | -1.347411 | -2.370001 |
|    |  | C    | 0.889332                | -2.089034 | -1.856956 |
|    |  | H    | -0.131486               | -2.639313 | -2.445448 |

|    |                                                                                     |                                                                                      |                         |           |           |
|----|-------------------------------------------------------------------------------------|--------------------------------------------------------------------------------------|-------------------------|-----------|-----------|
|    |                                                                                     | H                                                                                    | 1.559630                | -2.950997 | -1.762814 |
|    |                                                                                     | C                                                                                    | 1.402458                | -1.058642 | -2.846770 |
|    |                                                                                     | H                                                                                    | 0.701537                | -0.220676 | -2.933658 |
|    |                                                                                     | H                                                                                    | 1.472668                | -1.517571 | -3.841081 |
|    |                                                                                     | C                                                                                    | 3.326250                | 0.498042  | -3.489936 |
|    |                                                                                     | H                                                                                    | 2.655482                | 1.359795  | -3.581208 |
|    |                                                                                     | H                                                                                    | 4.313915                | 0.871504  | -3.199017 |
|    |                                                                                     | H                                                                                    | 3.419965                | 0.040401  | -4.481441 |
|    |                                                                                     | N                                                                                    | -1.842304               | -0.957643 | -1.629320 |
|    |                                                                                     | C                                                                                    | -2.092252               | 0.070502  | -2.570162 |
|    |                                                                                     | O                                                                                    | -1.685698               | 1.205248  | -2.384273 |
|    |                                                                                     | O                                                                                    | -2.778107               | -0.371413 | -3.612942 |
|    |                                                                                     | C                                                                                    | -3.263467               | 0.539528  | -4.690281 |
|    |                                                                                     | C                                                                                    | -2.066585               | 1.154882  | -5.418517 |
|    |                                                                                     | H                                                                                    | -2.427671               | 1.713332  | -6.288291 |
|    |                                                                                     | H                                                                                    | -1.511876               | 1.837474  | -4.773243 |
|    |                                                                                     | H                                                                                    | -1.392298               | 0.370331  | -5.775723 |
|    |                                                                                     | C                                                                                    | -4.198811               | 1.590726  | -4.089353 |
|    |                                                                                     | H                                                                                    | -3.662978               | 2.280257  | -3.435163 |
|    |                                                                                     | H                                                                                    | -4.654856               | 2.166339  | -4.901273 |
|    |                                                                                     | H                                                                                    | -5.001473               | 1.108709  | -3.522747 |
|    |                                                                                     | C                                                                                    | -4.027542               | -0.421479 | -5.601935 |
|    |                                                                                     | H                                                                                    | -4.433523               | 0.130020  | -6.455298 |
|    |                                                                                     | H                                                                                    | -3.365586               | -1.207074 | -5.976792 |
|    |                                                                                     | H                                                                                    | -4.854208               | -0.892189 | -5.063179 |
|    |                                                                                     | C                                                                                    | -1.258292               | -4.584528 | -2.990803 |
|    |                                                                                     | H                                                                                    | -0.761941               | -5.055314 | -2.133245 |
|    |                                                                                     | H                                                                                    | -2.273193               | -4.992711 | -3.058573 |
|    |                                                                                     | C                                                                                    | -0.520446               | -5.004636 | -4.251867 |
|    |                                                                                     | F                                                                                    | 0.751940                | -4.530645 | -4.277990 |
|    |                                                                                     | F                                                                                    | -1.127029               | -4.580494 | -5.379789 |
|    |                                                                                     | F                                                                                    | -0.444070               | -6.357512 | -4.315137 |
| 23 | 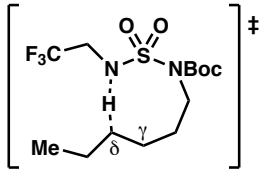 |  |                         |           |           |
|    |                                                                                     | Atom                                                                                 | Coordinates (Angstroms) |           |           |
|    |                                                                                     |                                                                                      | X                       | Y         | Z         |
|    |                                                                                     |                                                                                      | -----                   |           |           |
|    |                                                                                     | C                                                                                    | -0.852979               | -0.102643 | 0.000349  |
|    |                                                                                     | C                                                                                    | 0.547290                | 0.020208  | -0.585228 |

*Supporting Information for Sulfamides Direct Radical-Mediated Chlorination*

|   |           |           |           |
|---|-----------|-----------|-----------|
| H | -0.772857 | -0.560897 | 0.993933  |
| H | 1.254313  | 0.431382  | 0.145619  |
| H | -1.235852 | 0.915351  | 0.174778  |
| C | -1.616048 | -2.360776 | -1.083191 |
| H | -1.193601 | -2.842453 | -0.201920 |
| H | -2.550549 | -2.865357 | -1.333192 |
| C | -1.898850 | -0.870689 | -0.828137 |
| H | -2.085206 | -0.379193 | -1.788093 |
| H | -2.847949 | -0.824910 | -0.279641 |
| N | 1.153049  | -2.546926 | -0.471967 |
| H | 0.926316  | -1.196001 | -0.596128 |
| C | 0.737853  | 0.623883  | -1.965202 |
| H | 1.757625  | 0.418371  | -2.310342 |
| H | 0.065715  | 0.151429  | -2.688006 |
| C | 0.508479  | 2.150180  | -1.969426 |
| H | 0.696780  | 2.556382  | -2.968586 |
| H | -0.519845 | 2.404500  | -1.692734 |
| H | 1.182196  | 2.654513  | -1.267814 |
| S | 0.909455  | -3.191398 | -2.009420 |
| O | 0.938810  | -4.652882 | -1.871899 |
| O | 1.784697  | -2.563585 | -3.003035 |
| N | -0.697913 | -2.615838 | -2.235071 |
| C | -1.315841 | -2.747477 | -3.494186 |
| O | -2.455552 | -2.354412 | -3.677317 |
| O | -0.517481 | -3.339861 | -4.376046 |
| C | -0.896411 | -3.511692 | -5.807725 |
| C | 0.349353  | -4.178814 | -6.392099 |
| H | 0.196821  | -4.367895 | -7.458976 |
| H | 1.225549  | -3.536027 | -6.271452 |
| H | 0.547314  | -5.131926 | -5.893717 |
| C | -1.137422 | -2.140517 | -6.442654 |
| H | -1.287606 | -2.268599 | -7.519505 |
| H | -2.021035 | -1.654253 | -6.026147 |
| H | -0.267342 | -1.493004 | -6.296074 |
| C | -2.113932 | -4.433624 | -5.905250 |
| H | -3.005477 | -3.966002 | -5.484937 |
| H | -2.303844 | -4.663631 | -6.958766 |
| H | -1.922619 | -5.375126 | -5.381111 |
| C | 2.517274  | -2.774953 | 0.004366  |
| H | 3.241283  | -2.052218 | -0.390974 |
| H | 2.859783  | -3.779486 | -0.267638 |
| C | 2.544523  | -2.690255 | 1.522819  |
| F | 3.811543  | -2.867839 | 1.972687  |
| F | 1.770002  | -3.626046 | 2.110501  |
| F | 2.125295  | -1.481298 | 1.976832  |

| 24                                                                                                                                                                                                                                                                                                                                                                                                                                                                                                                                                                                                                                                                                                                                                                                                                                                                                                                                                                                                                                                                                                                                                                                                                                                                                                                                                                                                                                                                                                                                                                                                                                                                                                                                                                                                                                                                                                                                                                                                                                                                                                                                                                                                                                                                                                                                                                                                                                                                                                                                                                                                                                                                                                                                                                                                                                                  | 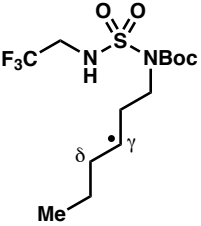 |  |           |                         |  |  |   |           |          |           |   |           |           |          |   |          |          |          |   |           |          |           |   |           |          |          |   |           |          |          |   |           |          |          |   |           |          |           |   |           |          |           |   |           |          |           |   |          |           |           |   |           |           |           |   |           |          |           |   |           |          |          |   |           |          |           |   |           |          |           |   |           |          |           |   |           |          |           |   |           |          |           |   |           |          |          |   |           |          |           |   |           |          |           |   |           |          |           |   |           |          |           |   |          |           |           |   |          |          |           |   |          |           |           |   |          |           |           |   |          |           |           |   |          |           |           |   |          |           |           |   |           |          |           |   |           |          |           |   |          |          |           |   |          |          |           |   |          |          |           |
|-----------------------------------------------------------------------------------------------------------------------------------------------------------------------------------------------------------------------------------------------------------------------------------------------------------------------------------------------------------------------------------------------------------------------------------------------------------------------------------------------------------------------------------------------------------------------------------------------------------------------------------------------------------------------------------------------------------------------------------------------------------------------------------------------------------------------------------------------------------------------------------------------------------------------------------------------------------------------------------------------------------------------------------------------------------------------------------------------------------------------------------------------------------------------------------------------------------------------------------------------------------------------------------------------------------------------------------------------------------------------------------------------------------------------------------------------------------------------------------------------------------------------------------------------------------------------------------------------------------------------------------------------------------------------------------------------------------------------------------------------------------------------------------------------------------------------------------------------------------------------------------------------------------------------------------------------------------------------------------------------------------------------------------------------------------------------------------------------------------------------------------------------------------------------------------------------------------------------------------------------------------------------------------------------------------------------------------------------------------------------------------------------------------------------------------------------------------------------------------------------------------------------------------------------------------------------------------------------------------------------------------------------------------------------------------------------------------------------------------------------------------------------------------------------------------------------------------------------------|-----------------------------------------------------------------------------------|------------------------------------------------------------------------------------|-----------|-------------------------|--|--|---|-----------|----------|-----------|---|-----------|-----------|----------|---|----------|----------|----------|---|-----------|----------|-----------|---|-----------|----------|----------|---|-----------|----------|----------|---|-----------|----------|----------|---|-----------|----------|-----------|---|-----------|----------|-----------|---|-----------|----------|-----------|---|----------|-----------|-----------|---|-----------|-----------|-----------|---|-----------|----------|-----------|---|-----------|----------|----------|---|-----------|----------|-----------|---|-----------|----------|-----------|---|-----------|----------|-----------|---|-----------|----------|-----------|---|-----------|----------|-----------|---|-----------|----------|----------|---|-----------|----------|-----------|---|-----------|----------|-----------|---|-----------|----------|-----------|---|-----------|----------|-----------|---|----------|-----------|-----------|---|----------|----------|-----------|---|----------|-----------|-----------|---|----------|-----------|-----------|---|----------|-----------|-----------|---|----------|-----------|-----------|---|----------|-----------|-----------|---|-----------|----------|-----------|---|-----------|----------|-----------|---|----------|----------|-----------|---|----------|----------|-----------|---|----------|----------|-----------|
| <table border="0" style="width: 100%; text-align: center;"> <thead> <tr> <th style="text-align: left;">Atom</th> <th colspan="3">Coordinates (Angstroms)</th> </tr> <tr> <th></th> <th>X</th> <th>Y</th> <th>Z</th> </tr> </thead> </table>                                                                                                                                                                                                                                                                                                                                                                                                                                                                                                                                                                                                                                                                                                                                                                                                                                                                                                                                                                                                                                                                                                                                                                                                                                                                                                                                                                                                                                                                                                                                                                                                                                                                                                                                                                                                                                                                                                                                                                                                                                                                                                                                                                                                                                                                                                                                                                                                                                                                                                                                                                                                         |                                                                                   |                                                                                    | Atom      | Coordinates (Angstroms) |  |  |   | X         | Y        | Z         |   |           |           |          |   |          |          |          |   |           |          |           |   |           |          |          |   |           |          |          |   |           |          |          |   |           |          |           |   |           |          |           |   |           |          |           |   |          |           |           |   |           |           |           |   |           |          |           |   |           |          |          |   |           |          |           |   |           |          |           |   |           |          |           |   |           |          |           |   |           |          |           |   |           |          |          |   |           |          |           |   |           |          |           |   |           |          |           |   |           |          |           |   |          |           |           |   |          |          |           |   |          |           |           |   |          |           |           |   |          |           |           |   |          |           |           |   |          |           |           |   |           |          |           |   |           |          |           |   |          |          |           |   |          |          |           |   |          |          |           |
| Atom                                                                                                                                                                                                                                                                                                                                                                                                                                                                                                                                                                                                                                                                                                                                                                                                                                                                                                                                                                                                                                                                                                                                                                                                                                                                                                                                                                                                                                                                                                                                                                                                                                                                                                                                                                                                                                                                                                                                                                                                                                                                                                                                                                                                                                                                                                                                                                                                                                                                                                                                                                                                                                                                                                                                                                                                                                                | Coordinates (Angstroms)                                                           |                                                                                    |           |                         |  |  |   |           |          |           |   |           |           |          |   |          |          |          |   |           |          |           |   |           |          |          |   |           |          |          |   |           |          |          |   |           |          |           |   |           |          |           |   |           |          |           |   |          |           |           |   |           |           |           |   |           |          |           |   |           |          |          |   |           |          |           |   |           |          |           |   |           |          |           |   |           |          |           |   |           |          |           |   |           |          |          |   |           |          |           |   |           |          |           |   |           |          |           |   |           |          |           |   |          |           |           |   |          |          |           |   |          |           |           |   |          |           |           |   |          |           |           |   |          |           |           |   |          |           |           |   |           |          |           |   |           |          |           |   |          |          |           |   |          |          |           |   |          |          |           |
|                                                                                                                                                                                                                                                                                                                                                                                                                                                                                                                                                                                                                                                                                                                                                                                                                                                                                                                                                                                                                                                                                                                                                                                                                                                                                                                                                                                                                                                                                                                                                                                                                                                                                                                                                                                                                                                                                                                                                                                                                                                                                                                                                                                                                                                                                                                                                                                                                                                                                                                                                                                                                                                                                                                                                                                                                                                     | X                                                                                 | Y                                                                                  | Z         |                         |  |  |   |           |          |           |   |           |           |          |   |          |          |          |   |           |          |           |   |           |          |          |   |           |          |          |   |           |          |          |   |           |          |           |   |           |          |           |   |           |          |           |   |          |           |           |   |           |           |           |   |           |          |           |   |           |          |          |   |           |          |           |   |           |          |           |   |           |          |           |   |           |          |           |   |           |          |           |   |           |          |          |   |           |          |           |   |           |          |           |   |           |          |           |   |           |          |           |   |          |           |           |   |          |          |           |   |          |           |           |   |          |           |           |   |          |           |           |   |          |           |           |   |          |           |           |   |           |          |           |   |           |          |           |   |          |          |           |   |          |          |           |   |          |          |           |
| <table border="0" style="width: 100%; text-align: center;"> <tbody> <tr><td colspan="4">-----</td></tr> <tr><td>S</td><td>-0.102612</td><td>0.557737</td><td>-0.000026</td></tr> <tr><td>O</td><td>-1.163759</td><td>-0.232201</td><td>0.621884</td></tr> <tr><td>O</td><td>1.207168</td><td>0.701572</td><td>0.623722</td></tr> <tr><td>N</td><td>-0.809773</td><td>2.102195</td><td>-0.225439</td></tr> <tr><td>C</td><td>-2.191614</td><td>2.340414</td><td>0.267059</td></tr> <tr><td>H</td><td>-2.358457</td><td>1.691073</td><td>1.124643</td></tr> <tr><td>H</td><td>-2.211530</td><td>3.376852</td><td>0.606859</td></tr> <tr><td>C</td><td>-3.264295</td><td>2.108841</td><td>-0.806737</td></tr> <tr><td>H</td><td>-2.983772</td><td>2.690450</td><td>-1.703502</td></tr> <tr><td>H</td><td>-3.261025</td><td>1.053280</td><td>-1.110169</td></tr> <tr><td>N</td><td>0.134204</td><td>-0.013928</td><td>-1.555412</td></tr> <tr><td>H</td><td>-0.673584</td><td>-0.528506</td><td>-1.893776</td></tr> <tr><td>C</td><td>-4.628324</td><td>2.500353</td><td>-0.335689</td></tr> <tr><td>H</td><td>-4.719924</td><td>3.400052</td><td>0.273112</td></tr> <tr><td>C</td><td>-5.867116</td><td>1.927030</td><td>-0.944139</td></tr> <tr><td>H</td><td>-5.751892</td><td>0.837565</td><td>-1.059474</td></tr> <tr><td>H</td><td>-5.990823</td><td>2.308897</td><td>-1.976952</td></tr> <tr><td>C</td><td>-7.152312</td><td>2.228615</td><td>-0.156858</td></tr> <tr><td>H</td><td>-7.257108</td><td>3.316473</td><td>-0.047278</td></tr> <tr><td>H</td><td>-7.051959</td><td>1.824702</td><td>0.858874</td></tr> <tr><td>C</td><td>-8.410853</td><td>1.656607</td><td>-0.817754</td></tr> <tr><td>H</td><td>-8.347483</td><td>0.566044</td><td>-0.913371</td></tr> <tr><td>H</td><td>-9.307495</td><td>1.887256</td><td>-0.232578</td></tr> <tr><td>H</td><td>-8.553621</td><td>2.069979</td><td>-1.823445</td></tr> <tr><td>C</td><td>1.437040</td><td>-0.446918</td><td>-2.023051</td></tr> <tr><td>H</td><td>2.210961</td><td>0.090519</td><td>-1.475520</td></tr> <tr><td>H</td><td>1.536107</td><td>-0.216900</td><td>-3.087973</td></tr> <tr><td>C</td><td>1.679652</td><td>-1.943767</td><td>-1.858321</td></tr> <tr><td>F</td><td>0.729807</td><td>-2.671389</td><td>-2.506840</td></tr> <tr><td>F</td><td>2.879066</td><td>-2.283890</td><td>-2.389522</td></tr> <tr><td>F</td><td>1.671268</td><td>-2.343395</td><td>-0.570645</td></tr> <tr><td>C</td><td>-0.145300</td><td>3.175180</td><td>-0.839821</td></tr> <tr><td>O</td><td>-0.662259</td><td>4.276393</td><td>-0.919624</td></tr> <tr><td>O</td><td>1.055768</td><td>2.823754</td><td>-1.304568</td></tr> <tr><td>C</td><td>1.995840</td><td>3.840145</td><td>-1.864558</td></tr> <tr><td>C</td><td>3.234001</td><td>3.002489</td><td>-2.187393</td></tr> </tbody> </table> |                                                                                   |                                                                                    | -----     |                         |  |  | S | -0.102612 | 0.557737 | -0.000026 | O | -1.163759 | -0.232201 | 0.621884 | O | 1.207168 | 0.701572 | 0.623722 | N | -0.809773 | 2.102195 | -0.225439 | C | -2.191614 | 2.340414 | 0.267059 | H | -2.358457 | 1.691073 | 1.124643 | H | -2.211530 | 3.376852 | 0.606859 | C | -3.264295 | 2.108841 | -0.806737 | H | -2.983772 | 2.690450 | -1.703502 | H | -3.261025 | 1.053280 | -1.110169 | N | 0.134204 | -0.013928 | -1.555412 | H | -0.673584 | -0.528506 | -1.893776 | C | -4.628324 | 2.500353 | -0.335689 | H | -4.719924 | 3.400052 | 0.273112 | C | -5.867116 | 1.927030 | -0.944139 | H | -5.751892 | 0.837565 | -1.059474 | H | -5.990823 | 2.308897 | -1.976952 | C | -7.152312 | 2.228615 | -0.156858 | H | -7.257108 | 3.316473 | -0.047278 | H | -7.051959 | 1.824702 | 0.858874 | C | -8.410853 | 1.656607 | -0.817754 | H | -8.347483 | 0.566044 | -0.913371 | H | -9.307495 | 1.887256 | -0.232578 | H | -8.553621 | 2.069979 | -1.823445 | C | 1.437040 | -0.446918 | -2.023051 | H | 2.210961 | 0.090519 | -1.475520 | H | 1.536107 | -0.216900 | -3.087973 | C | 1.679652 | -1.943767 | -1.858321 | F | 0.729807 | -2.671389 | -2.506840 | F | 2.879066 | -2.283890 | -2.389522 | F | 1.671268 | -2.343395 | -0.570645 | C | -0.145300 | 3.175180 | -0.839821 | O | -0.662259 | 4.276393 | -0.919624 | O | 1.055768 | 2.823754 | -1.304568 | C | 1.995840 | 3.840145 | -1.864558 | C | 3.234001 | 3.002489 | -2.187393 |
| -----                                                                                                                                                                                                                                                                                                                                                                                                                                                                                                                                                                                                                                                                                                                                                                                                                                                                                                                                                                                                                                                                                                                                                                                                                                                                                                                                                                                                                                                                                                                                                                                                                                                                                                                                                                                                                                                                                                                                                                                                                                                                                                                                                                                                                                                                                                                                                                                                                                                                                                                                                                                                                                                                                                                                                                                                                                               |                                                                                   |                                                                                    |           |                         |  |  |   |           |          |           |   |           |           |          |   |          |          |          |   |           |          |           |   |           |          |          |   |           |          |          |   |           |          |          |   |           |          |           |   |           |          |           |   |           |          |           |   |          |           |           |   |           |           |           |   |           |          |           |   |           |          |          |   |           |          |           |   |           |          |           |   |           |          |           |   |           |          |           |   |           |          |           |   |           |          |          |   |           |          |           |   |           |          |           |   |           |          |           |   |           |          |           |   |          |           |           |   |          |          |           |   |          |           |           |   |          |           |           |   |          |           |           |   |          |           |           |   |          |           |           |   |           |          |           |   |           |          |           |   |          |          |           |   |          |          |           |   |          |          |           |
| S                                                                                                                                                                                                                                                                                                                                                                                                                                                                                                                                                                                                                                                                                                                                                                                                                                                                                                                                                                                                                                                                                                                                                                                                                                                                                                                                                                                                                                                                                                                                                                                                                                                                                                                                                                                                                                                                                                                                                                                                                                                                                                                                                                                                                                                                                                                                                                                                                                                                                                                                                                                                                                                                                                                                                                                                                                                   | -0.102612                                                                         | 0.557737                                                                           | -0.000026 |                         |  |  |   |           |          |           |   |           |           |          |   |          |          |          |   |           |          |           |   |           |          |          |   |           |          |          |   |           |          |          |   |           |          |           |   |           |          |           |   |           |          |           |   |          |           |           |   |           |           |           |   |           |          |           |   |           |          |          |   |           |          |           |   |           |          |           |   |           |          |           |   |           |          |           |   |           |          |           |   |           |          |          |   |           |          |           |   |           |          |           |   |           |          |           |   |           |          |           |   |          |           |           |   |          |          |           |   |          |           |           |   |          |           |           |   |          |           |           |   |          |           |           |   |          |           |           |   |           |          |           |   |           |          |           |   |          |          |           |   |          |          |           |   |          |          |           |
| O                                                                                                                                                                                                                                                                                                                                                                                                                                                                                                                                                                                                                                                                                                                                                                                                                                                                                                                                                                                                                                                                                                                                                                                                                                                                                                                                                                                                                                                                                                                                                                                                                                                                                                                                                                                                                                                                                                                                                                                                                                                                                                                                                                                                                                                                                                                                                                                                                                                                                                                                                                                                                                                                                                                                                                                                                                                   | -1.163759                                                                         | -0.232201                                                                          | 0.621884  |                         |  |  |   |           |          |           |   |           |           |          |   |          |          |          |   |           |          |           |   |           |          |          |   |           |          |          |   |           |          |          |   |           |          |           |   |           |          |           |   |           |          |           |   |          |           |           |   |           |           |           |   |           |          |           |   |           |          |          |   |           |          |           |   |           |          |           |   |           |          |           |   |           |          |           |   |           |          |           |   |           |          |          |   |           |          |           |   |           |          |           |   |           |          |           |   |           |          |           |   |          |           |           |   |          |          |           |   |          |           |           |   |          |           |           |   |          |           |           |   |          |           |           |   |          |           |           |   |           |          |           |   |           |          |           |   |          |          |           |   |          |          |           |   |          |          |           |
| O                                                                                                                                                                                                                                                                                                                                                                                                                                                                                                                                                                                                                                                                                                                                                                                                                                                                                                                                                                                                                                                                                                                                                                                                                                                                                                                                                                                                                                                                                                                                                                                                                                                                                                                                                                                                                                                                                                                                                                                                                                                                                                                                                                                                                                                                                                                                                                                                                                                                                                                                                                                                                                                                                                                                                                                                                                                   | 1.207168                                                                          | 0.701572                                                                           | 0.623722  |                         |  |  |   |           |          |           |   |           |           |          |   |          |          |          |   |           |          |           |   |           |          |          |   |           |          |          |   |           |          |          |   |           |          |           |   |           |          |           |   |           |          |           |   |          |           |           |   |           |           |           |   |           |          |           |   |           |          |          |   |           |          |           |   |           |          |           |   |           |          |           |   |           |          |           |   |           |          |           |   |           |          |          |   |           |          |           |   |           |          |           |   |           |          |           |   |           |          |           |   |          |           |           |   |          |          |           |   |          |           |           |   |          |           |           |   |          |           |           |   |          |           |           |   |          |           |           |   |           |          |           |   |           |          |           |   |          |          |           |   |          |          |           |   |          |          |           |
| N                                                                                                                                                                                                                                                                                                                                                                                                                                                                                                                                                                                                                                                                                                                                                                                                                                                                                                                                                                                                                                                                                                                                                                                                                                                                                                                                                                                                                                                                                                                                                                                                                                                                                                                                                                                                                                                                                                                                                                                                                                                                                                                                                                                                                                                                                                                                                                                                                                                                                                                                                                                                                                                                                                                                                                                                                                                   | -0.809773                                                                         | 2.102195                                                                           | -0.225439 |                         |  |  |   |           |          |           |   |           |           |          |   |          |          |          |   |           |          |           |   |           |          |          |   |           |          |          |   |           |          |          |   |           |          |           |   |           |          |           |   |           |          |           |   |          |           |           |   |           |           |           |   |           |          |           |   |           |          |          |   |           |          |           |   |           |          |           |   |           |          |           |   |           |          |           |   |           |          |           |   |           |          |          |   |           |          |           |   |           |          |           |   |           |          |           |   |           |          |           |   |          |           |           |   |          |          |           |   |          |           |           |   |          |           |           |   |          |           |           |   |          |           |           |   |          |           |           |   |           |          |           |   |           |          |           |   |          |          |           |   |          |          |           |   |          |          |           |
| C                                                                                                                                                                                                                                                                                                                                                                                                                                                                                                                                                                                                                                                                                                                                                                                                                                                                                                                                                                                                                                                                                                                                                                                                                                                                                                                                                                                                                                                                                                                                                                                                                                                                                                                                                                                                                                                                                                                                                                                                                                                                                                                                                                                                                                                                                                                                                                                                                                                                                                                                                                                                                                                                                                                                                                                                                                                   | -2.191614                                                                         | 2.340414                                                                           | 0.267059  |                         |  |  |   |           |          |           |   |           |           |          |   |          |          |          |   |           |          |           |   |           |          |          |   |           |          |          |   |           |          |          |   |           |          |           |   |           |          |           |   |           |          |           |   |          |           |           |   |           |           |           |   |           |          |           |   |           |          |          |   |           |          |           |   |           |          |           |   |           |          |           |   |           |          |           |   |           |          |           |   |           |          |          |   |           |          |           |   |           |          |           |   |           |          |           |   |           |          |           |   |          |           |           |   |          |          |           |   |          |           |           |   |          |           |           |   |          |           |           |   |          |           |           |   |          |           |           |   |           |          |           |   |           |          |           |   |          |          |           |   |          |          |           |   |          |          |           |
| H                                                                                                                                                                                                                                                                                                                                                                                                                                                                                                                                                                                                                                                                                                                                                                                                                                                                                                                                                                                                                                                                                                                                                                                                                                                                                                                                                                                                                                                                                                                                                                                                                                                                                                                                                                                                                                                                                                                                                                                                                                                                                                                                                                                                                                                                                                                                                                                                                                                                                                                                                                                                                                                                                                                                                                                                                                                   | -2.358457                                                                         | 1.691073                                                                           | 1.124643  |                         |  |  |   |           |          |           |   |           |           |          |   |          |          |          |   |           |          |           |   |           |          |          |   |           |          |          |   |           |          |          |   |           |          |           |   |           |          |           |   |           |          |           |   |          |           |           |   |           |           |           |   |           |          |           |   |           |          |          |   |           |          |           |   |           |          |           |   |           |          |           |   |           |          |           |   |           |          |           |   |           |          |          |   |           |          |           |   |           |          |           |   |           |          |           |   |           |          |           |   |          |           |           |   |          |          |           |   |          |           |           |   |          |           |           |   |          |           |           |   |          |           |           |   |          |           |           |   |           |          |           |   |           |          |           |   |          |          |           |   |          |          |           |   |          |          |           |
| H                                                                                                                                                                                                                                                                                                                                                                                                                                                                                                                                                                                                                                                                                                                                                                                                                                                                                                                                                                                                                                                                                                                                                                                                                                                                                                                                                                                                                                                                                                                                                                                                                                                                                                                                                                                                                                                                                                                                                                                                                                                                                                                                                                                                                                                                                                                                                                                                                                                                                                                                                                                                                                                                                                                                                                                                                                                   | -2.211530                                                                         | 3.376852                                                                           | 0.606859  |                         |  |  |   |           |          |           |   |           |           |          |   |          |          |          |   |           |          |           |   |           |          |          |   |           |          |          |   |           |          |          |   |           |          |           |   |           |          |           |   |           |          |           |   |          |           |           |   |           |           |           |   |           |          |           |   |           |          |          |   |           |          |           |   |           |          |           |   |           |          |           |   |           |          |           |   |           |          |           |   |           |          |          |   |           |          |           |   |           |          |           |   |           |          |           |   |           |          |           |   |          |           |           |   |          |          |           |   |          |           |           |   |          |           |           |   |          |           |           |   |          |           |           |   |          |           |           |   |           |          |           |   |           |          |           |   |          |          |           |   |          |          |           |   |          |          |           |
| C                                                                                                                                                                                                                                                                                                                                                                                                                                                                                                                                                                                                                                                                                                                                                                                                                                                                                                                                                                                                                                                                                                                                                                                                                                                                                                                                                                                                                                                                                                                                                                                                                                                                                                                                                                                                                                                                                                                                                                                                                                                                                                                                                                                                                                                                                                                                                                                                                                                                                                                                                                                                                                                                                                                                                                                                                                                   | -3.264295                                                                         | 2.108841                                                                           | -0.806737 |                         |  |  |   |           |          |           |   |           |           |          |   |          |          |          |   |           |          |           |   |           |          |          |   |           |          |          |   |           |          |          |   |           |          |           |   |           |          |           |   |           |          |           |   |          |           |           |   |           |           |           |   |           |          |           |   |           |          |          |   |           |          |           |   |           |          |           |   |           |          |           |   |           |          |           |   |           |          |           |   |           |          |          |   |           |          |           |   |           |          |           |   |           |          |           |   |           |          |           |   |          |           |           |   |          |          |           |   |          |           |           |   |          |           |           |   |          |           |           |   |          |           |           |   |          |           |           |   |           |          |           |   |           |          |           |   |          |          |           |   |          |          |           |   |          |          |           |
| H                                                                                                                                                                                                                                                                                                                                                                                                                                                                                                                                                                                                                                                                                                                                                                                                                                                                                                                                                                                                                                                                                                                                                                                                                                                                                                                                                                                                                                                                                                                                                                                                                                                                                                                                                                                                                                                                                                                                                                                                                                                                                                                                                                                                                                                                                                                                                                                                                                                                                                                                                                                                                                                                                                                                                                                                                                                   | -2.983772                                                                         | 2.690450                                                                           | -1.703502 |                         |  |  |   |           |          |           |   |           |           |          |   |          |          |          |   |           |          |           |   |           |          |          |   |           |          |          |   |           |          |          |   |           |          |           |   |           |          |           |   |           |          |           |   |          |           |           |   |           |           |           |   |           |          |           |   |           |          |          |   |           |          |           |   |           |          |           |   |           |          |           |   |           |          |           |   |           |          |           |   |           |          |          |   |           |          |           |   |           |          |           |   |           |          |           |   |           |          |           |   |          |           |           |   |          |          |           |   |          |           |           |   |          |           |           |   |          |           |           |   |          |           |           |   |          |           |           |   |           |          |           |   |           |          |           |   |          |          |           |   |          |          |           |   |          |          |           |
| H                                                                                                                                                                                                                                                                                                                                                                                                                                                                                                                                                                                                                                                                                                                                                                                                                                                                                                                                                                                                                                                                                                                                                                                                                                                                                                                                                                                                                                                                                                                                                                                                                                                                                                                                                                                                                                                                                                                                                                                                                                                                                                                                                                                                                                                                                                                                                                                                                                                                                                                                                                                                                                                                                                                                                                                                                                                   | -3.261025                                                                         | 1.053280                                                                           | -1.110169 |                         |  |  |   |           |          |           |   |           |           |          |   |          |          |          |   |           |          |           |   |           |          |          |   |           |          |          |   |           |          |          |   |           |          |           |   |           |          |           |   |           |          |           |   |          |           |           |   |           |           |           |   |           |          |           |   |           |          |          |   |           |          |           |   |           |          |           |   |           |          |           |   |           |          |           |   |           |          |           |   |           |          |          |   |           |          |           |   |           |          |           |   |           |          |           |   |           |          |           |   |          |           |           |   |          |          |           |   |          |           |           |   |          |           |           |   |          |           |           |   |          |           |           |   |          |           |           |   |           |          |           |   |           |          |           |   |          |          |           |   |          |          |           |   |          |          |           |
| N                                                                                                                                                                                                                                                                                                                                                                                                                                                                                                                                                                                                                                                                                                                                                                                                                                                                                                                                                                                                                                                                                                                                                                                                                                                                                                                                                                                                                                                                                                                                                                                                                                                                                                                                                                                                                                                                                                                                                                                                                                                                                                                                                                                                                                                                                                                                                                                                                                                                                                                                                                                                                                                                                                                                                                                                                                                   | 0.134204                                                                          | -0.013928                                                                          | -1.555412 |                         |  |  |   |           |          |           |   |           |           |          |   |          |          |          |   |           |          |           |   |           |          |          |   |           |          |          |   |           |          |          |   |           |          |           |   |           |          |           |   |           |          |           |   |          |           |           |   |           |           |           |   |           |          |           |   |           |          |          |   |           |          |           |   |           |          |           |   |           |          |           |   |           |          |           |   |           |          |           |   |           |          |          |   |           |          |           |   |           |          |           |   |           |          |           |   |           |          |           |   |          |           |           |   |          |          |           |   |          |           |           |   |          |           |           |   |          |           |           |   |          |           |           |   |          |           |           |   |           |          |           |   |           |          |           |   |          |          |           |   |          |          |           |   |          |          |           |
| H                                                                                                                                                                                                                                                                                                                                                                                                                                                                                                                                                                                                                                                                                                                                                                                                                                                                                                                                                                                                                                                                                                                                                                                                                                                                                                                                                                                                                                                                                                                                                                                                                                                                                                                                                                                                                                                                                                                                                                                                                                                                                                                                                                                                                                                                                                                                                                                                                                                                                                                                                                                                                                                                                                                                                                                                                                                   | -0.673584                                                                         | -0.528506                                                                          | -1.893776 |                         |  |  |   |           |          |           |   |           |           |          |   |          |          |          |   |           |          |           |   |           |          |          |   |           |          |          |   |           |          |          |   |           |          |           |   |           |          |           |   |           |          |           |   |          |           |           |   |           |           |           |   |           |          |           |   |           |          |          |   |           |          |           |   |           |          |           |   |           |          |           |   |           |          |           |   |           |          |           |   |           |          |          |   |           |          |           |   |           |          |           |   |           |          |           |   |           |          |           |   |          |           |           |   |          |          |           |   |          |           |           |   |          |           |           |   |          |           |           |   |          |           |           |   |          |           |           |   |           |          |           |   |           |          |           |   |          |          |           |   |          |          |           |   |          |          |           |
| C                                                                                                                                                                                                                                                                                                                                                                                                                                                                                                                                                                                                                                                                                                                                                                                                                                                                                                                                                                                                                                                                                                                                                                                                                                                                                                                                                                                                                                                                                                                                                                                                                                                                                                                                                                                                                                                                                                                                                                                                                                                                                                                                                                                                                                                                                                                                                                                                                                                                                                                                                                                                                                                                                                                                                                                                                                                   | -4.628324                                                                         | 2.500353                                                                           | -0.335689 |                         |  |  |   |           |          |           |   |           |           |          |   |          |          |          |   |           |          |           |   |           |          |          |   |           |          |          |   |           |          |          |   |           |          |           |   |           |          |           |   |           |          |           |   |          |           |           |   |           |           |           |   |           |          |           |   |           |          |          |   |           |          |           |   |           |          |           |   |           |          |           |   |           |          |           |   |           |          |           |   |           |          |          |   |           |          |           |   |           |          |           |   |           |          |           |   |           |          |           |   |          |           |           |   |          |          |           |   |          |           |           |   |          |           |           |   |          |           |           |   |          |           |           |   |          |           |           |   |           |          |           |   |           |          |           |   |          |          |           |   |          |          |           |   |          |          |           |
| H                                                                                                                                                                                                                                                                                                                                                                                                                                                                                                                                                                                                                                                                                                                                                                                                                                                                                                                                                                                                                                                                                                                                                                                                                                                                                                                                                                                                                                                                                                                                                                                                                                                                                                                                                                                                                                                                                                                                                                                                                                                                                                                                                                                                                                                                                                                                                                                                                                                                                                                                                                                                                                                                                                                                                                                                                                                   | -4.719924                                                                         | 3.400052                                                                           | 0.273112  |                         |  |  |   |           |          |           |   |           |           |          |   |          |          |          |   |           |          |           |   |           |          |          |   |           |          |          |   |           |          |          |   |           |          |           |   |           |          |           |   |           |          |           |   |          |           |           |   |           |           |           |   |           |          |           |   |           |          |          |   |           |          |           |   |           |          |           |   |           |          |           |   |           |          |           |   |           |          |           |   |           |          |          |   |           |          |           |   |           |          |           |   |           |          |           |   |           |          |           |   |          |           |           |   |          |          |           |   |          |           |           |   |          |           |           |   |          |           |           |   |          |           |           |   |          |           |           |   |           |          |           |   |           |          |           |   |          |          |           |   |          |          |           |   |          |          |           |
| C                                                                                                                                                                                                                                                                                                                                                                                                                                                                                                                                                                                                                                                                                                                                                                                                                                                                                                                                                                                                                                                                                                                                                                                                                                                                                                                                                                                                                                                                                                                                                                                                                                                                                                                                                                                                                                                                                                                                                                                                                                                                                                                                                                                                                                                                                                                                                                                                                                                                                                                                                                                                                                                                                                                                                                                                                                                   | -5.867116                                                                         | 1.927030                                                                           | -0.944139 |                         |  |  |   |           |          |           |   |           |           |          |   |          |          |          |   |           |          |           |   |           |          |          |   |           |          |          |   |           |          |          |   |           |          |           |   |           |          |           |   |           |          |           |   |          |           |           |   |           |           |           |   |           |          |           |   |           |          |          |   |           |          |           |   |           |          |           |   |           |          |           |   |           |          |           |   |           |          |           |   |           |          |          |   |           |          |           |   |           |          |           |   |           |          |           |   |           |          |           |   |          |           |           |   |          |          |           |   |          |           |           |   |          |           |           |   |          |           |           |   |          |           |           |   |          |           |           |   |           |          |           |   |           |          |           |   |          |          |           |   |          |          |           |   |          |          |           |
| H                                                                                                                                                                                                                                                                                                                                                                                                                                                                                                                                                                                                                                                                                                                                                                                                                                                                                                                                                                                                                                                                                                                                                                                                                                                                                                                                                                                                                                                                                                                                                                                                                                                                                                                                                                                                                                                                                                                                                                                                                                                                                                                                                                                                                                                                                                                                                                                                                                                                                                                                                                                                                                                                                                                                                                                                                                                   | -5.751892                                                                         | 0.837565                                                                           | -1.059474 |                         |  |  |   |           |          |           |   |           |           |          |   |          |          |          |   |           |          |           |   |           |          |          |   |           |          |          |   |           |          |          |   |           |          |           |   |           |          |           |   |           |          |           |   |          |           |           |   |           |           |           |   |           |          |           |   |           |          |          |   |           |          |           |   |           |          |           |   |           |          |           |   |           |          |           |   |           |          |           |   |           |          |          |   |           |          |           |   |           |          |           |   |           |          |           |   |           |          |           |   |          |           |           |   |          |          |           |   |          |           |           |   |          |           |           |   |          |           |           |   |          |           |           |   |          |           |           |   |           |          |           |   |           |          |           |   |          |          |           |   |          |          |           |   |          |          |           |
| H                                                                                                                                                                                                                                                                                                                                                                                                                                                                                                                                                                                                                                                                                                                                                                                                                                                                                                                                                                                                                                                                                                                                                                                                                                                                                                                                                                                                                                                                                                                                                                                                                                                                                                                                                                                                                                                                                                                                                                                                                                                                                                                                                                                                                                                                                                                                                                                                                                                                                                                                                                                                                                                                                                                                                                                                                                                   | -5.990823                                                                         | 2.308897                                                                           | -1.976952 |                         |  |  |   |           |          |           |   |           |           |          |   |          |          |          |   |           |          |           |   |           |          |          |   |           |          |          |   |           |          |          |   |           |          |           |   |           |          |           |   |           |          |           |   |          |           |           |   |           |           |           |   |           |          |           |   |           |          |          |   |           |          |           |   |           |          |           |   |           |          |           |   |           |          |           |   |           |          |           |   |           |          |          |   |           |          |           |   |           |          |           |   |           |          |           |   |           |          |           |   |          |           |           |   |          |          |           |   |          |           |           |   |          |           |           |   |          |           |           |   |          |           |           |   |          |           |           |   |           |          |           |   |           |          |           |   |          |          |           |   |          |          |           |   |          |          |           |
| C                                                                                                                                                                                                                                                                                                                                                                                                                                                                                                                                                                                                                                                                                                                                                                                                                                                                                                                                                                                                                                                                                                                                                                                                                                                                                                                                                                                                                                                                                                                                                                                                                                                                                                                                                                                                                                                                                                                                                                                                                                                                                                                                                                                                                                                                                                                                                                                                                                                                                                                                                                                                                                                                                                                                                                                                                                                   | -7.152312                                                                         | 2.228615                                                                           | -0.156858 |                         |  |  |   |           |          |           |   |           |           |          |   |          |          |          |   |           |          |           |   |           |          |          |   |           |          |          |   |           |          |          |   |           |          |           |   |           |          |           |   |           |          |           |   |          |           |           |   |           |           |           |   |           |          |           |   |           |          |          |   |           |          |           |   |           |          |           |   |           |          |           |   |           |          |           |   |           |          |           |   |           |          |          |   |           |          |           |   |           |          |           |   |           |          |           |   |           |          |           |   |          |           |           |   |          |          |           |   |          |           |           |   |          |           |           |   |          |           |           |   |          |           |           |   |          |           |           |   |           |          |           |   |           |          |           |   |          |          |           |   |          |          |           |   |          |          |           |
| H                                                                                                                                                                                                                                                                                                                                                                                                                                                                                                                                                                                                                                                                                                                                                                                                                                                                                                                                                                                                                                                                                                                                                                                                                                                                                                                                                                                                                                                                                                                                                                                                                                                                                                                                                                                                                                                                                                                                                                                                                                                                                                                                                                                                                                                                                                                                                                                                                                                                                                                                                                                                                                                                                                                                                                                                                                                   | -7.257108                                                                         | 3.316473                                                                           | -0.047278 |                         |  |  |   |           |          |           |   |           |           |          |   |          |          |          |   |           |          |           |   |           |          |          |   |           |          |          |   |           |          |          |   |           |          |           |   |           |          |           |   |           |          |           |   |          |           |           |   |           |           |           |   |           |          |           |   |           |          |          |   |           |          |           |   |           |          |           |   |           |          |           |   |           |          |           |   |           |          |           |   |           |          |          |   |           |          |           |   |           |          |           |   |           |          |           |   |           |          |           |   |          |           |           |   |          |          |           |   |          |           |           |   |          |           |           |   |          |           |           |   |          |           |           |   |          |           |           |   |           |          |           |   |           |          |           |   |          |          |           |   |          |          |           |   |          |          |           |
| H                                                                                                                                                                                                                                                                                                                                                                                                                                                                                                                                                                                                                                                                                                                                                                                                                                                                                                                                                                                                                                                                                                                                                                                                                                                                                                                                                                                                                                                                                                                                                                                                                                                                                                                                                                                                                                                                                                                                                                                                                                                                                                                                                                                                                                                                                                                                                                                                                                                                                                                                                                                                                                                                                                                                                                                                                                                   | -7.051959                                                                         | 1.824702                                                                           | 0.858874  |                         |  |  |   |           |          |           |   |           |           |          |   |          |          |          |   |           |          |           |   |           |          |          |   |           |          |          |   |           |          |          |   |           |          |           |   |           |          |           |   |           |          |           |   |          |           |           |   |           |           |           |   |           |          |           |   |           |          |          |   |           |          |           |   |           |          |           |   |           |          |           |   |           |          |           |   |           |          |           |   |           |          |          |   |           |          |           |   |           |          |           |   |           |          |           |   |           |          |           |   |          |           |           |   |          |          |           |   |          |           |           |   |          |           |           |   |          |           |           |   |          |           |           |   |          |           |           |   |           |          |           |   |           |          |           |   |          |          |           |   |          |          |           |   |          |          |           |
| C                                                                                                                                                                                                                                                                                                                                                                                                                                                                                                                                                                                                                                                                                                                                                                                                                                                                                                                                                                                                                                                                                                                                                                                                                                                                                                                                                                                                                                                                                                                                                                                                                                                                                                                                                                                                                                                                                                                                                                                                                                                                                                                                                                                                                                                                                                                                                                                                                                                                                                                                                                                                                                                                                                                                                                                                                                                   | -8.410853                                                                         | 1.656607                                                                           | -0.817754 |                         |  |  |   |           |          |           |   |           |           |          |   |          |          |          |   |           |          |           |   |           |          |          |   |           |          |          |   |           |          |          |   |           |          |           |   |           |          |           |   |           |          |           |   |          |           |           |   |           |           |           |   |           |          |           |   |           |          |          |   |           |          |           |   |           |          |           |   |           |          |           |   |           |          |           |   |           |          |           |   |           |          |          |   |           |          |           |   |           |          |           |   |           |          |           |   |           |          |           |   |          |           |           |   |          |          |           |   |          |           |           |   |          |           |           |   |          |           |           |   |          |           |           |   |          |           |           |   |           |          |           |   |           |          |           |   |          |          |           |   |          |          |           |   |          |          |           |
| H                                                                                                                                                                                                                                                                                                                                                                                                                                                                                                                                                                                                                                                                                                                                                                                                                                                                                                                                                                                                                                                                                                                                                                                                                                                                                                                                                                                                                                                                                                                                                                                                                                                                                                                                                                                                                                                                                                                                                                                                                                                                                                                                                                                                                                                                                                                                                                                                                                                                                                                                                                                                                                                                                                                                                                                                                                                   | -8.347483                                                                         | 0.566044                                                                           | -0.913371 |                         |  |  |   |           |          |           |   |           |           |          |   |          |          |          |   |           |          |           |   |           |          |          |   |           |          |          |   |           |          |          |   |           |          |           |   |           |          |           |   |           |          |           |   |          |           |           |   |           |           |           |   |           |          |           |   |           |          |          |   |           |          |           |   |           |          |           |   |           |          |           |   |           |          |           |   |           |          |           |   |           |          |          |   |           |          |           |   |           |          |           |   |           |          |           |   |           |          |           |   |          |           |           |   |          |          |           |   |          |           |           |   |          |           |           |   |          |           |           |   |          |           |           |   |          |           |           |   |           |          |           |   |           |          |           |   |          |          |           |   |          |          |           |   |          |          |           |
| H                                                                                                                                                                                                                                                                                                                                                                                                                                                                                                                                                                                                                                                                                                                                                                                                                                                                                                                                                                                                                                                                                                                                                                                                                                                                                                                                                                                                                                                                                                                                                                                                                                                                                                                                                                                                                                                                                                                                                                                                                                                                                                                                                                                                                                                                                                                                                                                                                                                                                                                                                                                                                                                                                                                                                                                                                                                   | -9.307495                                                                         | 1.887256                                                                           | -0.232578 |                         |  |  |   |           |          |           |   |           |           |          |   |          |          |          |   |           |          |           |   |           |          |          |   |           |          |          |   |           |          |          |   |           |          |           |   |           |          |           |   |           |          |           |   |          |           |           |   |           |           |           |   |           |          |           |   |           |          |          |   |           |          |           |   |           |          |           |   |           |          |           |   |           |          |           |   |           |          |           |   |           |          |          |   |           |          |           |   |           |          |           |   |           |          |           |   |           |          |           |   |          |           |           |   |          |          |           |   |          |           |           |   |          |           |           |   |          |           |           |   |          |           |           |   |          |           |           |   |           |          |           |   |           |          |           |   |          |          |           |   |          |          |           |   |          |          |           |
| H                                                                                                                                                                                                                                                                                                                                                                                                                                                                                                                                                                                                                                                                                                                                                                                                                                                                                                                                                                                                                                                                                                                                                                                                                                                                                                                                                                                                                                                                                                                                                                                                                                                                                                                                                                                                                                                                                                                                                                                                                                                                                                                                                                                                                                                                                                                                                                                                                                                                                                                                                                                                                                                                                                                                                                                                                                                   | -8.553621                                                                         | 2.069979                                                                           | -1.823445 |                         |  |  |   |           |          |           |   |           |           |          |   |          |          |          |   |           |          |           |   |           |          |          |   |           |          |          |   |           |          |          |   |           |          |           |   |           |          |           |   |           |          |           |   |          |           |           |   |           |           |           |   |           |          |           |   |           |          |          |   |           |          |           |   |           |          |           |   |           |          |           |   |           |          |           |   |           |          |           |   |           |          |          |   |           |          |           |   |           |          |           |   |           |          |           |   |           |          |           |   |          |           |           |   |          |          |           |   |          |           |           |   |          |           |           |   |          |           |           |   |          |           |           |   |          |           |           |   |           |          |           |   |           |          |           |   |          |          |           |   |          |          |           |   |          |          |           |
| C                                                                                                                                                                                                                                                                                                                                                                                                                                                                                                                                                                                                                                                                                                                                                                                                                                                                                                                                                                                                                                                                                                                                                                                                                                                                                                                                                                                                                                                                                                                                                                                                                                                                                                                                                                                                                                                                                                                                                                                                                                                                                                                                                                                                                                                                                                                                                                                                                                                                                                                                                                                                                                                                                                                                                                                                                                                   | 1.437040                                                                          | -0.446918                                                                          | -2.023051 |                         |  |  |   |           |          |           |   |           |           |          |   |          |          |          |   |           |          |           |   |           |          |          |   |           |          |          |   |           |          |          |   |           |          |           |   |           |          |           |   |           |          |           |   |          |           |           |   |           |           |           |   |           |          |           |   |           |          |          |   |           |          |           |   |           |          |           |   |           |          |           |   |           |          |           |   |           |          |           |   |           |          |          |   |           |          |           |   |           |          |           |   |           |          |           |   |           |          |           |   |          |           |           |   |          |          |           |   |          |           |           |   |          |           |           |   |          |           |           |   |          |           |           |   |          |           |           |   |           |          |           |   |           |          |           |   |          |          |           |   |          |          |           |   |          |          |           |
| H                                                                                                                                                                                                                                                                                                                                                                                                                                                                                                                                                                                                                                                                                                                                                                                                                                                                                                                                                                                                                                                                                                                                                                                                                                                                                                                                                                                                                                                                                                                                                                                                                                                                                                                                                                                                                                                                                                                                                                                                                                                                                                                                                                                                                                                                                                                                                                                                                                                                                                                                                                                                                                                                                                                                                                                                                                                   | 2.210961                                                                          | 0.090519                                                                           | -1.475520 |                         |  |  |   |           |          |           |   |           |           |          |   |          |          |          |   |           |          |           |   |           |          |          |   |           |          |          |   |           |          |          |   |           |          |           |   |           |          |           |   |           |          |           |   |          |           |           |   |           |           |           |   |           |          |           |   |           |          |          |   |           |          |           |   |           |          |           |   |           |          |           |   |           |          |           |   |           |          |           |   |           |          |          |   |           |          |           |   |           |          |           |   |           |          |           |   |           |          |           |   |          |           |           |   |          |          |           |   |          |           |           |   |          |           |           |   |          |           |           |   |          |           |           |   |          |           |           |   |           |          |           |   |           |          |           |   |          |          |           |   |          |          |           |   |          |          |           |
| H                                                                                                                                                                                                                                                                                                                                                                                                                                                                                                                                                                                                                                                                                                                                                                                                                                                                                                                                                                                                                                                                                                                                                                                                                                                                                                                                                                                                                                                                                                                                                                                                                                                                                                                                                                                                                                                                                                                                                                                                                                                                                                                                                                                                                                                                                                                                                                                                                                                                                                                                                                                                                                                                                                                                                                                                                                                   | 1.536107                                                                          | -0.216900                                                                          | -3.087973 |                         |  |  |   |           |          |           |   |           |           |          |   |          |          |          |   |           |          |           |   |           |          |          |   |           |          |          |   |           |          |          |   |           |          |           |   |           |          |           |   |           |          |           |   |          |           |           |   |           |           |           |   |           |          |           |   |           |          |          |   |           |          |           |   |           |          |           |   |           |          |           |   |           |          |           |   |           |          |           |   |           |          |          |   |           |          |           |   |           |          |           |   |           |          |           |   |           |          |           |   |          |           |           |   |          |          |           |   |          |           |           |   |          |           |           |   |          |           |           |   |          |           |           |   |          |           |           |   |           |          |           |   |           |          |           |   |          |          |           |   |          |          |           |   |          |          |           |
| C                                                                                                                                                                                                                                                                                                                                                                                                                                                                                                                                                                                                                                                                                                                                                                                                                                                                                                                                                                                                                                                                                                                                                                                                                                                                                                                                                                                                                                                                                                                                                                                                                                                                                                                                                                                                                                                                                                                                                                                                                                                                                                                                                                                                                                                                                                                                                                                                                                                                                                                                                                                                                                                                                                                                                                                                                                                   | 1.679652                                                                          | -1.943767                                                                          | -1.858321 |                         |  |  |   |           |          |           |   |           |           |          |   |          |          |          |   |           |          |           |   |           |          |          |   |           |          |          |   |           |          |          |   |           |          |           |   |           |          |           |   |           |          |           |   |          |           |           |   |           |           |           |   |           |          |           |   |           |          |          |   |           |          |           |   |           |          |           |   |           |          |           |   |           |          |           |   |           |          |           |   |           |          |          |   |           |          |           |   |           |          |           |   |           |          |           |   |           |          |           |   |          |           |           |   |          |          |           |   |          |           |           |   |          |           |           |   |          |           |           |   |          |           |           |   |          |           |           |   |           |          |           |   |           |          |           |   |          |          |           |   |          |          |           |   |          |          |           |
| F                                                                                                                                                                                                                                                                                                                                                                                                                                                                                                                                                                                                                                                                                                                                                                                                                                                                                                                                                                                                                                                                                                                                                                                                                                                                                                                                                                                                                                                                                                                                                                                                                                                                                                                                                                                                                                                                                                                                                                                                                                                                                                                                                                                                                                                                                                                                                                                                                                                                                                                                                                                                                                                                                                                                                                                                                                                   | 0.729807                                                                          | -2.671389                                                                          | -2.506840 |                         |  |  |   |           |          |           |   |           |           |          |   |          |          |          |   |           |          |           |   |           |          |          |   |           |          |          |   |           |          |          |   |           |          |           |   |           |          |           |   |           |          |           |   |          |           |           |   |           |           |           |   |           |          |           |   |           |          |          |   |           |          |           |   |           |          |           |   |           |          |           |   |           |          |           |   |           |          |           |   |           |          |          |   |           |          |           |   |           |          |           |   |           |          |           |   |           |          |           |   |          |           |           |   |          |          |           |   |          |           |           |   |          |           |           |   |          |           |           |   |          |           |           |   |          |           |           |   |           |          |           |   |           |          |           |   |          |          |           |   |          |          |           |   |          |          |           |
| F                                                                                                                                                                                                                                                                                                                                                                                                                                                                                                                                                                                                                                                                                                                                                                                                                                                                                                                                                                                                                                                                                                                                                                                                                                                                                                                                                                                                                                                                                                                                                                                                                                                                                                                                                                                                                                                                                                                                                                                                                                                                                                                                                                                                                                                                                                                                                                                                                                                                                                                                                                                                                                                                                                                                                                                                                                                   | 2.879066                                                                          | -2.283890                                                                          | -2.389522 |                         |  |  |   |           |          |           |   |           |           |          |   |          |          |          |   |           |          |           |   |           |          |          |   |           |          |          |   |           |          |          |   |           |          |           |   |           |          |           |   |           |          |           |   |          |           |           |   |           |           |           |   |           |          |           |   |           |          |          |   |           |          |           |   |           |          |           |   |           |          |           |   |           |          |           |   |           |          |           |   |           |          |          |   |           |          |           |   |           |          |           |   |           |          |           |   |           |          |           |   |          |           |           |   |          |          |           |   |          |           |           |   |          |           |           |   |          |           |           |   |          |           |           |   |          |           |           |   |           |          |           |   |           |          |           |   |          |          |           |   |          |          |           |   |          |          |           |
| F                                                                                                                                                                                                                                                                                                                                                                                                                                                                                                                                                                                                                                                                                                                                                                                                                                                                                                                                                                                                                                                                                                                                                                                                                                                                                                                                                                                                                                                                                                                                                                                                                                                                                                                                                                                                                                                                                                                                                                                                                                                                                                                                                                                                                                                                                                                                                                                                                                                                                                                                                                                                                                                                                                                                                                                                                                                   | 1.671268                                                                          | -2.343395                                                                          | -0.570645 |                         |  |  |   |           |          |           |   |           |           |          |   |          |          |          |   |           |          |           |   |           |          |          |   |           |          |          |   |           |          |          |   |           |          |           |   |           |          |           |   |           |          |           |   |          |           |           |   |           |           |           |   |           |          |           |   |           |          |          |   |           |          |           |   |           |          |           |   |           |          |           |   |           |          |           |   |           |          |           |   |           |          |          |   |           |          |           |   |           |          |           |   |           |          |           |   |           |          |           |   |          |           |           |   |          |          |           |   |          |           |           |   |          |           |           |   |          |           |           |   |          |           |           |   |          |           |           |   |           |          |           |   |           |          |           |   |          |          |           |   |          |          |           |   |          |          |           |
| C                                                                                                                                                                                                                                                                                                                                                                                                                                                                                                                                                                                                                                                                                                                                                                                                                                                                                                                                                                                                                                                                                                                                                                                                                                                                                                                                                                                                                                                                                                                                                                                                                                                                                                                                                                                                                                                                                                                                                                                                                                                                                                                                                                                                                                                                                                                                                                                                                                                                                                                                                                                                                                                                                                                                                                                                                                                   | -0.145300                                                                         | 3.175180                                                                           | -0.839821 |                         |  |  |   |           |          |           |   |           |           |          |   |          |          |          |   |           |          |           |   |           |          |          |   |           |          |          |   |           |          |          |   |           |          |           |   |           |          |           |   |           |          |           |   |          |           |           |   |           |           |           |   |           |          |           |   |           |          |          |   |           |          |           |   |           |          |           |   |           |          |           |   |           |          |           |   |           |          |           |   |           |          |          |   |           |          |           |   |           |          |           |   |           |          |           |   |           |          |           |   |          |           |           |   |          |          |           |   |          |           |           |   |          |           |           |   |          |           |           |   |          |           |           |   |          |           |           |   |           |          |           |   |           |          |           |   |          |          |           |   |          |          |           |   |          |          |           |
| O                                                                                                                                                                                                                                                                                                                                                                                                                                                                                                                                                                                                                                                                                                                                                                                                                                                                                                                                                                                                                                                                                                                                                                                                                                                                                                                                                                                                                                                                                                                                                                                                                                                                                                                                                                                                                                                                                                                                                                                                                                                                                                                                                                                                                                                                                                                                                                                                                                                                                                                                                                                                                                                                                                                                                                                                                                                   | -0.662259                                                                         | 4.276393                                                                           | -0.919624 |                         |  |  |   |           |          |           |   |           |           |          |   |          |          |          |   |           |          |           |   |           |          |          |   |           |          |          |   |           |          |          |   |           |          |           |   |           |          |           |   |           |          |           |   |          |           |           |   |           |           |           |   |           |          |           |   |           |          |          |   |           |          |           |   |           |          |           |   |           |          |           |   |           |          |           |   |           |          |           |   |           |          |          |   |           |          |           |   |           |          |           |   |           |          |           |   |           |          |           |   |          |           |           |   |          |          |           |   |          |           |           |   |          |           |           |   |          |           |           |   |          |           |           |   |          |           |           |   |           |          |           |   |           |          |           |   |          |          |           |   |          |          |           |   |          |          |           |
| O                                                                                                                                                                                                                                                                                                                                                                                                                                                                                                                                                                                                                                                                                                                                                                                                                                                                                                                                                                                                                                                                                                                                                                                                                                                                                                                                                                                                                                                                                                                                                                                                                                                                                                                                                                                                                                                                                                                                                                                                                                                                                                                                                                                                                                                                                                                                                                                                                                                                                                                                                                                                                                                                                                                                                                                                                                                   | 1.055768                                                                          | 2.823754                                                                           | -1.304568 |                         |  |  |   |           |          |           |   |           |           |          |   |          |          |          |   |           |          |           |   |           |          |          |   |           |          |          |   |           |          |          |   |           |          |           |   |           |          |           |   |           |          |           |   |          |           |           |   |           |           |           |   |           |          |           |   |           |          |          |   |           |          |           |   |           |          |           |   |           |          |           |   |           |          |           |   |           |          |           |   |           |          |          |   |           |          |           |   |           |          |           |   |           |          |           |   |           |          |           |   |          |           |           |   |          |          |           |   |          |           |           |   |          |           |           |   |          |           |           |   |          |           |           |   |          |           |           |   |           |          |           |   |           |          |           |   |          |          |           |   |          |          |           |   |          |          |           |
| C                                                                                                                                                                                                                                                                                                                                                                                                                                                                                                                                                                                                                                                                                                                                                                                                                                                                                                                                                                                                                                                                                                                                                                                                                                                                                                                                                                                                                                                                                                                                                                                                                                                                                                                                                                                                                                                                                                                                                                                                                                                                                                                                                                                                                                                                                                                                                                                                                                                                                                                                                                                                                                                                                                                                                                                                                                                   | 1.995840                                                                          | 3.840145                                                                           | -1.864558 |                         |  |  |   |           |          |           |   |           |           |          |   |          |          |          |   |           |          |           |   |           |          |          |   |           |          |          |   |           |          |          |   |           |          |           |   |           |          |           |   |           |          |           |   |          |           |           |   |           |           |           |   |           |          |           |   |           |          |          |   |           |          |           |   |           |          |           |   |           |          |           |   |           |          |           |   |           |          |           |   |           |          |          |   |           |          |           |   |           |          |           |   |           |          |           |   |           |          |           |   |          |           |           |   |          |          |           |   |          |           |           |   |          |           |           |   |          |           |           |   |          |           |           |   |          |           |           |   |           |          |           |   |           |          |           |   |          |          |           |   |          |          |           |   |          |          |           |
| C                                                                                                                                                                                                                                                                                                                                                                                                                                                                                                                                                                                                                                                                                                                                                                                                                                                                                                                                                                                                                                                                                                                                                                                                                                                                                                                                                                                                                                                                                                                                                                                                                                                                                                                                                                                                                                                                                                                                                                                                                                                                                                                                                                                                                                                                                                                                                                                                                                                                                                                                                                                                                                                                                                                                                                                                                                                   | 3.234001                                                                          | 3.002489                                                                           | -2.187393 |                         |  |  |   |           |          |           |   |           |           |          |   |          |          |          |   |           |          |           |   |           |          |          |   |           |          |          |   |           |          |          |   |           |          |           |   |           |          |           |   |           |          |           |   |          |           |           |   |           |           |           |   |           |          |           |   |           |          |          |   |           |          |           |   |           |          |           |   |           |          |           |   |           |          |           |   |           |          |           |   |           |          |          |   |           |          |           |   |           |          |           |   |           |          |           |   |           |          |           |   |          |           |           |   |          |          |           |   |          |           |           |   |          |           |           |   |          |           |           |   |          |           |           |   |          |           |           |   |           |          |           |   |           |          |           |   |          |          |           |   |          |          |           |   |          |          |           |

Supporting Information for Sulfamides Direct Radical-Mediated Chlorination

|    |                                                                                   |                                                                                    |             |                         |           |   |
|----|-----------------------------------------------------------------------------------|------------------------------------------------------------------------------------|-------------|-------------------------|-----------|---|
|    |                                                                                   | H                                                                                  | 4.018258    | 3.650108                | -2.589980 |   |
|    |                                                                                   | H                                                                                  | 3.618093    | 2.513157                | -1.287852 |   |
|    |                                                                                   | H                                                                                  | 3.005589    | 2.239243                | -2.937220 |   |
|    |                                                                                   | C                                                                                  | 1.401405    | 4.450180                | -3.136159 |   |
|    |                                                                                   | H                                                                                  | 1.126467    | 3.663701                | -3.846304 |   |
|    |                                                                                   | H                                                                                  | 0.521110    | 5.055153                | -2.916798 |   |
|    |                                                                                   | H                                                                                  | 2.154477    | 5.087190                | -3.611498 |   |
|    |                                                                                   | C                                                                                  | 2.314064    | 4.887480                | -0.794776 |   |
|    |                                                                                   | H                                                                                  | 3.102078    | 5.549265                | -1.168247 |   |
|    |                                                                                   | H                                                                                  | 1.440151    | 5.493616                | -0.552808 |   |
|    |                                                                                   | H                                                                                  | 2.679322    | 4.404204                | 0.116613  |   |
| 25 | 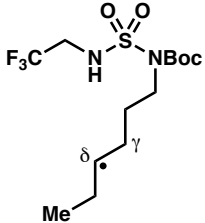 |  |             |                         |           |   |
|    | Center Number                                                                     | Atomic Number                                                                      | Atomic Type | Coordinates (Angstroms) |           |   |
|    |                                                                                   |                                                                                    |             | X                       | Y         | Z |
|    |                                                                                   |                                                                                    |             | -----                   |           |   |
|    |                                                                                   | S                                                                                  | 0.548313    | 0.204289                | -0.000145 |   |
|    |                                                                                   | O                                                                                  | -0.465194   | -0.583495               | 0.699656  |   |
|    |                                                                                   | O                                                                                  | 1.899173    | 0.348926                | 0.529220  |   |
|    |                                                                                   | N                                                                                  | -0.175010   | 1.746813                | -0.180720 |   |
|    |                                                                                   | C                                                                                  | -1.510504   | 1.991644                | 0.426278  |   |
|    |                                                                                   | H                                                                                  | -1.600564   | 1.345326                | 1.298788  |   |
|    |                                                                                   | H                                                                                  | -1.495652   | 3.028677                | 0.765702  |   |
|    |                                                                                   | C                                                                                  | -2.667562   | 1.759072                | -0.547539 |   |
|    |                                                                                   | H                                                                                  | -2.522756   | 2.386981                | -1.434838 |   |
|    |                                                                                   | H                                                                                  | -2.664356   | 0.714002                | -0.879206 |   |
|    |                                                                                   | N                                                                                  | 0.677242    | -0.369938               | -1.567330 |   |
|    |                                                                                   | H                                                                                  | -0.157204   | -0.873576               | -1.853625 |   |
|    |                                                                                   | C                                                                                  | -5.185866   | 1.907098                | -0.833561 |   |
|    |                                                                                   | H                                                                                  | -5.024371   | 2.081486                | -1.897608 |   |
|    |                                                                                   | C                                                                                  | -6.592251   | 1.858274                | -0.328739 |   |
|    |                                                                                   | H                                                                                  | -6.886548   | 2.853565                | 0.056678  |   |
|    |                                                                                   | H                                                                                  | -6.645752   | 1.192897                | 0.546689  |   |
|    |                                                                                   | C                                                                                  | -7.617050   | 1.414781                | -1.381954 |   |
|    |                                                                                   | H                                                                                  | -7.398210   | 0.403300                | -1.741533 |   |
|    |                                                                                   | H                                                                                  | -8.632197   | 1.415561                | -0.971415 |   |
|    |                                                                                   | H                                                                                  | -7.605968   | 2.087076                | -2.247661 |   |
|    |                                                                                   | C                                                                                  | 1.942203    | -0.825079               | -2.112314 |   |
|    |                                                                                   | H                                                                                  | 2.756387    | -0.295656               | -1.617862 |   |
|    |                                                                                   | H                                                                                  | 1.977660    | -0.602598               | -3.182863 |   |
|    |                                                                                   | C                                                                                  | 2.174112    | -2.324228               | -1.952752 |   |
|    |                                                                                   | F                                                                                  | 1.178398    | -3.042711               | -2.539299 |   |

Supporting Information for Sulfamides Direct Radical-Mediated Chlorination

|    |                                                                                    |                                                                                     |           |           |  |
|----|------------------------------------------------------------------------------------|-------------------------------------------------------------------------------------|-----------|-----------|--|
|    | F                                                                                  | 3.335616                                                                            | -2.683584 | -2.551237 |  |
|    | F                                                                                  | 2.236494                                                                            | -2.716135 | -0.664027 |  |
|    | C                                                                                  | 0.441736                                                                            | 2.818124  | -0.845811 |  |
|    | O                                                                                  | -0.079900                                                                           | 3.919130  | -0.889910 |  |
|    | O                                                                                  | 1.604803                                                                            | 2.465383  | -1.397760 |  |
|    | C                                                                                  | 2.494312                                                                            | 3.478074  | -2.040566 |  |
|    | C                                                                                  | 3.703370                                                                            | 2.638529  | -2.455519 |  |
|    | H                                                                                  | 4.451807                                                                            | 3.282833  | -2.925887 |  |
|    | H                                                                                  | 4.159472                                                                            | 2.157139  | -1.585785 |  |
|    | H                                                                                  | 3.415378                                                                            | 1.868665  | -3.177533 |  |
|    | C                                                                                  | 1.797791                                                                            | 4.076420  | -3.265097 |  |
|    | H                                                                                  | 1.465204                                                                            | 3.283416  | -3.942576 |  |
|    | H                                                                                  | 0.938731                                                                            | 4.684690  | -2.980399 |  |
|    | H                                                                                  | 2.509545                                                                            | 4.707827  | -3.806881 |  |
|    | C                                                                                  | 2.896211                                                                            | 4.534977  | -1.009028 |  |
|    | H                                                                                  | 3.649930                                                                            | 5.194761  | -1.450683 |  |
|    | H                                                                                  | 2.043402                                                                            | 5.141724  | -0.701959 |  |
|    | H                                                                                  | 3.335315                                                                            | 4.060071  | -0.126260 |  |
|    | C                                                                                  | -4.026272                                                                           | 2.082928  | 0.094509  |  |
|    | H                                                                                  | -3.999352                                                                           | 3.124186  | 0.471050  |  |
|    | H                                                                                  | -4.172035                                                                           | 1.459164  | 0.989991  |  |
| 26 | 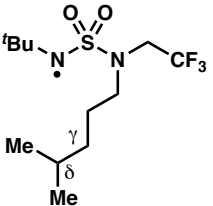 |  |           |           |  |
|    | Atom                                                                               | Coordinates (Angstroms)                                                             |           |           |  |
|    |                                                                                    | X                                                                                   | Y         | Z         |  |
|    | -----                                                                              |                                                                                     |           |           |  |
|    | C                                                                                  | 1.105909                                                                            | -0.538957 | -0.000122 |  |
|    | C                                                                                  | 0.751193                                                                            | 0.964031  | -0.172787 |  |
|    | H                                                                                  | 1.552946                                                                            | 1.603948  | 0.200041  |  |
|    | H                                                                                  | 0.563424                                                                            | 1.198870  | -1.224257 |  |
|    | H                                                                                  | -0.161349                                                                           | 1.168459  | 0.396415  |  |
|    | C                                                                                  | -0.053994                                                                           | -1.410914 | -0.516053 |  |
|    | H                                                                                  | -0.254254                                                                           | -1.203335 | -1.570992 |  |
|    | H                                                                                  | 0.185254                                                                            | -2.473420 | -0.411960 |  |
|    | H                                                                                  | -0.961062                                                                           | -1.202374 | 0.059982  |  |
|    | C                                                                                  | 1.394655                                                                            | -0.857642 | 1.483696  |  |
|    | H                                                                                  | 1.698714                                                                            | -1.900866 | 1.605318  |  |
|    | H                                                                                  | 2.173447                                                                            | -0.212584 | 1.896076  |  |
|    | H                                                                                  | 0.477965                                                                            | -0.697057 | 2.059475  |  |
|    | N                                                                                  | 2.235736                                                                            | -0.837317 | -0.897396 |  |
|    | S                                                                                  | 3.807451                                                                            | -0.444209 | -0.452200 |  |
|    | O                                                                                  | 4.342496                                                                            | -1.694554 | 0.117253  |  |
|    | O                                                                                  | 3.973617                                                                            | 0.804870  | 0.300985  |  |

|    |                                                                                     |                                                                                      |                         |           |           |
|----|-------------------------------------------------------------------------------------|--------------------------------------------------------------------------------------|-------------------------|-----------|-----------|
|    |                                                                                     | N                                                                                    | 4.439110                | -0.151314 | -1.981347 |
|    |                                                                                     | C                                                                                    | 5.451876                | 0.933519  | -2.108001 |
|    |                                                                                     | H                                                                                    | 5.989804                | 1.043631  | -1.161714 |
|    |                                                                                     | H                                                                                    | 6.175275                | 0.589112  | -2.853167 |
|    |                                                                                     | C                                                                                    | 4.849495                | 2.275964  | -2.530909 |
|    |                                                                                     | H                                                                                    | 4.309121                | 2.145752  | -3.476201 |
|    |                                                                                     | H                                                                                    | 4.117696                | 2.578715  | -1.776311 |
|    |                                                                                     | C                                                                                    | 5.933592                | 3.350795  | -2.694868 |
|    |                                                                                     | H                                                                                    | 6.437585                | 3.514025  | -1.730362 |
|    |                                                                                     | H                                                                                    | 6.703720                | 2.975170  | -3.384094 |
|    |                                                                                     | C                                                                                    | 5.427827                | 4.706974  | -3.228155 |
|    |                                                                                     | H                                                                                    | 4.902178                | 4.514736  | -4.175978 |
|    |                                                                                     | C                                                                                    | 4.529842                | -1.307283 | -2.866088 |
|    |                                                                                     | H                                                                                    | 3.964413                | -2.142535 | -2.451485 |
|    |                                                                                     | H                                                                                    | 5.567839                | -1.635867 | -2.996270 |
|    |                                                                                     | C                                                                                    | 3.958830                | -1.038404 | -4.255206 |
|    |                                                                                     | F                                                                                    | 4.027842                | -2.173322 | -4.997582 |
|    |                                                                                     | F                                                                                    | 4.656127                | -0.085195 | -4.928257 |
|    |                                                                                     | F                                                                                    | 2.670270                | -0.644002 | -4.234399 |
|    |                                                                                     | C                                                                                    | 6.611913                | 5.638971  | -3.530038 |
|    |                                                                                     | H                                                                                    | 7.305560                | 5.185309  | -4.247276 |
|    |                                                                                     | H                                                                                    | 6.269155                | 6.591148  | -3.950380 |
|    |                                                                                     | H                                                                                    | 7.175684                | 5.863120  | -2.615377 |
|    |                                                                                     | C                                                                                    | 4.438135                | 5.386094  | -2.267811 |
|    |                                                                                     | H                                                                                    | 3.543931                | 4.778342  | -2.097204 |
|    |                                                                                     | H                                                                                    | 4.907905                | 5.572269  | -1.293317 |
|    |                                                                                     | H                                                                                    | 4.108656                | 6.351631  | -2.667946 |
| 27 | 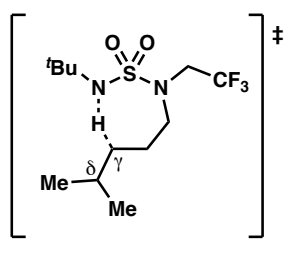 |  |                         |           |           |
|    |                                                                                     | Atom                                                                                 | Coordinates (Angstroms) |           |           |
|    |                                                                                     |                                                                                      | X                       | Y         | Z         |
|    |                                                                                     |                                                                                      | -----                   |           |           |
|    |                                                                                     | C                                                                                    | -0.297607               | 0.452434  | 0.000672  |
|    |                                                                                     | C                                                                                    | -0.266281               | -0.583320 | 1.148745  |
|    |                                                                                     | H                                                                                    | 0.633675                | 0.366632  | -0.569364 |
|    |                                                                                     | H                                                                                    | -0.281375               | 1.447053  | 0.466853  |
|    |                                                                                     | H                                                                                    | 0.584358                | -0.383135 | 1.805419  |
|    |                                                                                     | H                                                                                    | -1.167580               | -0.515907 | 1.761055  |
|    |                                                                                     | S                                                                                    | -1.515029               | -2.950357 | 0.550328  |



|    |                                                                                     |                                                                                      |           |           |
|----|-------------------------------------------------------------------------------------|--------------------------------------------------------------------------------------|-----------|-----------|
|    | O                                                                                   | -1.955160                                                                            | -3.346759 | 1.895083  |
|    | O                                                                                   | -1.163397                                                                            | -4.031098 | -0.390017 |
|    | N                                                                                   | -2.641551                                                                            | -1.835267 | 0.001847  |
|    | C                                                                                   | -3.860958                                                                            | -2.300172 | -0.735449 |
|    | C                                                                                   | -4.782234                                                                            | -1.069286 | -0.814526 |
|    | H                                                                                   | -4.329183                                                                            | -0.265060 | -1.402079 |
|    | H                                                                                   | -5.723070                                                                            | -1.345681 | -1.300760 |
|    | H                                                                                   | -5.005296                                                                            | -0.687131 | 0.185741  |
|    | C                                                                                   | -3.546492                                                                            | -2.817540 | -2.153766 |
|    | H                                                                                   | -2.883423                                                                            | -3.684103 | -2.122080 |
|    | H                                                                                   | -4.477306                                                                            | -3.108265 | -2.652359 |
|    | H                                                                                   | -3.072472                                                                            | -2.037845 | -2.757948 |
|    | C                                                                                   | -4.566158                                                                            | -3.402895 | 0.084978  |
|    | H                                                                                   | -4.762597                                                                            | -3.067256 | 1.105943  |
|    | H                                                                                   | -5.519713                                                                            | -3.638012 | -0.398907 |
|    | H                                                                                   | -3.974915                                                                            | -4.320698 | 0.128731  |
|    | H                                                                                   | -2.034556                                                                            | -0.835092 | -0.634379 |
|    | N                                                                                   | -0.153456                                                                            | -1.961861 | 0.648705  |
|    | C                                                                                   | 1.106540                                                                             | -2.442773 | 0.119183  |
|    | H                                                                                   | 0.929634                                                                             | -3.230629 | -0.615077 |
|    | C                                                                                   | 2.038358                                                                             | -3.018154 | 1.184799  |
|    | F                                                                                   | 1.506282                                                                             | -4.074444 | 1.830656  |
|    | F                                                                                   | 3.197183                                                                             | -3.431095 | 0.607017  |
|    | F                                                                                   | 2.374423                                                                             | -2.099953 | 2.130440  |
|    | H                                                                                   | 1.646277                                                                             | -1.628295 | -0.373432 |
|    | C                                                                                   | -1.315790                                                                            | 0.490027  | -2.428832 |
|    | H                                                                                   | -2.293152                                                                            | 0.299365  | -2.893105 |
|    | C                                                                                   | -0.934107                                                                            | 1.948606  | -2.773833 |
|    | H                                                                                   | -0.876338                                                                            | 2.078031  | -3.860320 |
|    | H                                                                                   | -1.673465                                                                            | 2.658054  | -2.387211 |
|    | H                                                                                   | 0.042676                                                                             | 2.212811  | -2.352979 |
|    | C                                                                                   | -0.310754                                                                            | -0.499332 | -3.040507 |
|    | H                                                                                   | 0.710492                                                                             | -0.311590 | -2.690719 |
|    | H                                                                                   | -0.566644                                                                            | -1.536412 | -2.801861 |
|    | H                                                                                   | -0.299560                                                                            | -0.399939 | -4.130961 |
|    | C                                                                                   | -1.504745                                                                            | 0.338901  | -0.921239 |
|    | H                                                                                   | -2.346237                                                                            | 0.939988  | -0.559087 |
| 28 | 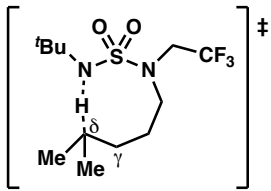 |  |           |           |

Supporting Information for Sulfamides Direct Radical-Mediated Chlorination

| Atom | Coordinates (Angstroms) |           |           |
|------|-------------------------|-----------|-----------|
|      | X                       | Y         | Z         |
| C    | -1.475525               | -0.392402 | 0.137640  |
| H    | -0.504352               | -0.695839 | 0.541132  |
| H    | -2.221531               | -0.736406 | 0.852138  |
| S    | -3.120629               | -2.054357 | -1.272732 |
| O    | -3.527771               | -2.466263 | 0.080494  |
| O    | -2.824924               | -3.078194 | -2.283074 |
| N    | -4.216657               | -0.969730 | -1.981674 |
| C    | -5.638641               | -1.440345 | -2.206131 |
| C    | -6.189291               | -0.538518 | -3.326244 |
| H    | -5.605908               | -0.669830 | -4.242379 |
| H    | -7.230402               | -0.805259 | -3.536802 |
| H    | -6.161430               | 0.516510  | -3.050268 |
| C    | -5.699740               | -2.903805 | -2.697522 |
| H    | -5.405122               | -3.615939 | -1.923697 |
| H    | -6.737549               | -3.116940 | -2.973544 |
| H    | -5.065161               | -3.062567 | -3.571032 |
| C    | -6.494254               | -1.311715 | -0.929441 |
| H    | -6.581052               | -0.270516 | -0.609545 |
| H    | -7.505128               | -1.682859 | -1.128106 |
| H    | -6.065659               | -1.894479 | -0.110530 |
| N    | -1.723002               | -1.146390 | -1.103938 |
| C    | -0.870510               | -0.967154 | -2.264683 |
| H    | -1.366558               | -1.356536 | -3.154249 |
| C    | 0.471978                | -1.690050 | -2.155900 |
| F    | 0.353778                | -3.010486 | -1.928953 |
| F    | 1.167253                | -1.530954 | -3.313315 |
| F    | 1.251090                | -1.182609 | -1.160299 |
| H    | -0.645209               | 0.091099  | -2.433806 |
| C    | -1.512323               | 1.136928  | -0.013913 |
| H    | -1.569924               | 1.553424  | 0.999201  |
| H    | -0.556789               | 1.490975  | -0.419956 |
| C    | -2.631146               | 1.720047  | -0.891827 |
| H    | -2.562136               | 2.816910  | -0.815735 |
| H    | -2.433661               | 1.496041  | -1.947937 |
| C    | -4.085201               | 1.340908  | -0.596717 |
| H    | -4.207067               | 0.159631  | -1.207657 |
| C    | -5.042932               | 2.248579  | -1.359308 |
| H    | -6.084993               | 1.933384  | -1.257244 |
| H    | -4.971517               | 3.267613  | -0.951138 |
| H    | -4.794131               | 2.304424  | -2.423589 |
| C    | -4.461832               | 1.198831  | 0.870039  |
| H    | -3.904949               | 0.415406  | 1.387591  |
| H    | -4.259240               | 2.147229  | 1.390542  |

| H     |                                                                                   | -5.527251                                                                          | 0.984900  | 0.990089  |
|-------|-----------------------------------------------------------------------------------|------------------------------------------------------------------------------------|-----------|-----------|
| 29    | 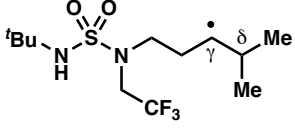 |  |           |           |
| Atom  |                                                                                   | Coordinates (Angstroms)                                                            |           |           |
|       |                                                                                   | X                                                                                  | Y         | Z         |
| ----- |                                                                                   |                                                                                    |           |           |
|       | C                                                                                 | 2.191326                                                                           | -2.091351 | -2.370091 |
|       | S                                                                                 | 0.356033                                                                           | -1.207191 | 1.063491  |
|       | O                                                                                 | -0.730625                                                                          | -2.033854 | 1.589589  |
|       | O                                                                                 | 1.628062                                                                           | -1.088104 | 1.766838  |
|       | N                                                                                 | -0.340671                                                                          | 0.338771  | 0.866615  |
|       | C                                                                                 | 0.363866                                                                           | 1.452609  | 0.375611  |
|       | O                                                                                 | -0.166391                                                                          | 2.547109  | 0.300336  |
|       | O                                                                                 | 1.611994                                                                           | 1.144534  | 0.023058  |
|       | C                                                                                 | 2.589996                                                                           | 2.209819  | -0.361225 |
|       | C                                                                                 | 2.755638                                                                           | 3.192752  | 0.800216  |
|       | H                                                                                 | 3.566787                                                                           | 3.888372  | 0.562463  |
|       | H                                                                                 | 1.846407                                                                           | 3.769716  | 0.973407  |
|       | H                                                                                 | 3.023352                                                                           | 2.659731  | 1.717826  |
|       | C                                                                                 | 2.132541                                                                           | 2.886198  | -1.655234 |
|       | H                                                                                 | 1.220786                                                                           | 3.464899  | -1.503675 |
|       | H                                                                                 | 2.922119                                                                           | 3.561158  | -2.001630 |
|       | H                                                                                 | 1.957637                                                                           | 2.139598  | -2.435759 |
|       | C                                                                                 | 3.876964                                                                           | 1.414600  | -0.584062 |
|       | H                                                                                 | 3.760376                                                                           | 0.705514  | -1.408045 |
|       | H                                                                                 | 4.688509                                                                           | 2.101536  | -0.841309 |
|       | H                                                                                 | 4.159944                                                                           | 0.870486  | 0.321714  |
|       | C                                                                                 | -1.788496                                                                          | 0.517138  | 1.156983  |
|       | H                                                                                 | -2.057153                                                                          | -0.174465 | 1.953196  |
|       | H                                                                                 | -1.888200                                                                          | 1.535737  | 1.533645  |
|       | C                                                                                 | -2.686861                                                                          | 0.310928  | -0.073757 |
|       | H                                                                                 | -2.288625                                                                          | 0.936013  | -0.891652 |
|       | H                                                                                 | -2.615328                                                                          | -0.730496 | -0.412925 |
|       | C                                                                                 | -5.435627                                                                          | 0.346879  | -1.911236 |
|       | H                                                                                 | -5.678926                                                                          | 1.412577  | -1.995269 |
|       | H                                                                                 | -4.520501                                                                          | 0.163165  | -2.483927 |
|       | H                                                                                 | -6.247033                                                                          | -0.225516 | -2.376685 |
|       | C                                                                                 | -6.574279                                                                          | 0.165511  | 0.350953  |
|       | H                                                                                 | -7.403694                                                                          | -0.381098 | -0.111297 |
|       | H                                                                                 | -6.482919                                                                          | -0.168923 | 1.389754  |
|       | H                                                                                 | -6.840638                                                                          | 1.229737  | 0.361838  |
|       | N                                                                                 | 0.665091                                                                           | -1.755999 | -0.500830 |

|    |                                                                                   |                                                                                    |                         |           |           |
|----|-----------------------------------------------------------------------------------|------------------------------------------------------------------------------------|-------------------------|-----------|-----------|
|    |                                                                                   | H                                                                                  | -0.044758               | -2.443476 | -0.742681 |
|    |                                                                                   | C                                                                                  | -4.112977               | 0.658839  | 0.214292  |
|    |                                                                                   | H                                                                                  | -4.312133               | 1.604978  | 0.719164  |
|    |                                                                                   | C                                                                                  | -5.265273               | -0.059358 | -0.423963 |
|    |                                                                                   | H                                                                                  | -5.039851               | -1.137837 | -0.413104 |
|    |                                                                                   | C                                                                                  | 2.026046                | -2.142045 | -0.859489 |
|    |                                                                                   | H                                                                                  | 2.289392                | -3.154836 | -0.533664 |
|    |                                                                                   | H                                                                                  | 2.728198                | -1.439184 | -0.412737 |
|    |                                                                                   | F                                                                                  | 2.019975                | -0.854988 | -2.884016 |
|    |                                                                                   | F                                                                                  | 3.433847                | -2.507470 | -2.714862 |
|    |                                                                                   | F                                                                                  | 1.304007                | -2.908979 | -2.996482 |
| 30 | 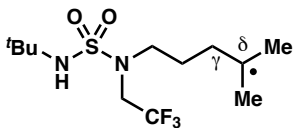 |  |                         |           |           |
|    |                                                                                   | Atom                                                                               | Coordinates (Angstroms) |           |           |
|    |                                                                                   |                                                                                    | X                       | Y         | Z         |
|    |                                                                                   |                                                                                    | -----                   |           |           |
|    |                                                                                   | C                                                                                  | -0.083891               | -0.278995 | 0.000068  |
|    |                                                                                   | C                                                                                  | -0.599742               | -1.691471 | 0.328531  |
|    |                                                                                   | H                                                                                  | -0.860148               | -1.787788 | 1.386194  |
|    |                                                                                   | H                                                                                  | -1.483729               | -1.937254 | -0.268029 |
|    |                                                                                   | H                                                                                  | 0.179606                | -2.427960 | 0.107111  |
|    |                                                                                   | C                                                                                  | 1.135429                | 0.077511  | 0.864689  |
|    |                                                                                   | H                                                                                  | 1.939417                | -0.640849 | 0.674116  |
|    |                                                                                   | H                                                                                  | 1.502169                | 1.078204  | 0.615244  |
|    |                                                                                   | H                                                                                  | 0.891447                | 0.050326  | 1.927944  |
|    |                                                                                   | C                                                                                  | 0.295440                | -0.191901 | -1.488616 |
|    |                                                                                   | H                                                                                  | -0.551031               | -0.457186 | -2.132778 |
|    |                                                                                   | H                                                                                  | 0.633607                | 0.815839  | -1.749702 |
|    |                                                                                   | H                                                                                  | 1.108173                | -0.892250 | -1.701119 |
|    |                                                                                   | S                                                                                  | -2.158187               | 0.835529  | 1.505263  |
|    |                                                                                   | O                                                                                  | -3.337969               | -0.032481 | 1.395470  |
|    |                                                                                   | O                                                                                  | -1.305860               | 0.704241  | 2.695688  |
|    |                                                                                   | C                                                                                  | -4.138637               | 2.657230  | 1.771287  |
|    |                                                                                   | H                                                                                  | -4.399155               | 1.944173  | 2.559750  |
|    |                                                                                   | H                                                                                  | -4.144269               | 3.653046  | 2.224558  |
|    |                                                                                   | C                                                                                  | -5.163760               | 2.589365  | 0.637547  |
|    |                                                                                   | H                                                                                  | -4.886975               | 3.308662  | -0.141112 |
|    |                                                                                   | H                                                                                  | -5.135549               | 1.592001  | 0.187735  |
|    |                                                                                   | C                                                                                  | -7.635286               | 2.893114  | 0.058072  |
|    |                                                                                   | C                                                                                  | -7.742710               | 4.094452  | -0.831614 |
|    |                                                                                   | H                                                                                  | -8.406502               | 4.864478  | -0.394811 |
|    |                                                                                   | H                                                                                  | -6.772298               | 4.576049  | -0.997115 |

Supporting Information for Sulfamides Direct Radical-Mediated Chlorination

|    |                                                                                    |                                                                                     |                         |           |           |
|----|------------------------------------------------------------------------------------|-------------------------------------------------------------------------------------|-------------------------|-----------|-----------|
|    |                                                                                    | H                                                                                   | -8.166097               | 3.840717  | -1.811320 |
|    |                                                                                    | C                                                                                   | -8.791396               | 1.943550  | 0.125910  |
|    |                                                                                    | H                                                                                   | -9.243222               | 1.782451  | -0.860592 |
|    |                                                                                    | H                                                                                   | -8.496097               | 0.968169  | 0.530084  |
|    |                                                                                    | H                                                                                   | -9.599385               | 2.323814  | 0.779851  |
|    |                                                                                    | N                                                                                   | -1.145890               | 0.780200  | 0.172467  |
|    |                                                                                    | H                                                                                   | -1.726416               | 0.882189  | -0.658385 |
|    |                                                                                    | C                                                                                   | -6.594259               | 2.884600  | 1.145137  |
|    |                                                                                    | H                                                                                   | -6.582543               | 3.862590  | 1.659318  |
|    |                                                                                    | H                                                                                   | -6.857244               | 2.139273  | 1.907164  |
|    |                                                                                    | N                                                                                   | -2.742200               | 2.412279  | 1.307296  |
|    |                                                                                    | C                                                                                   | -1.756494               | 3.464790  | 1.534554  |
|    |                                                                                    | H                                                                                   | -1.914358               | 3.977769  | 2.490520  |
|    |                                                                                    | H                                                                                   | -0.750607               | 3.043133  | 1.542409  |
|    |                                                                                    | C                                                                                   | -1.774577               | 4.521046  | 0.435960  |
|    |                                                                                    | F                                                                                   | -0.814252               | 5.449828  | 0.678183  |
|    |                                                                                    | F                                                                                   | -1.539335               | 4.008279  | -0.791939 |
|    |                                                                                    | F                                                                                   | -2.957472               | 5.184886  | 0.367530  |
| 31 | 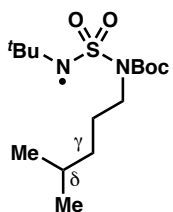 |  |                         |           |           |
|    |                                                                                    | Atom                                                                                | Coordinates (Angstroms) |           |           |
|    |                                                                                    |                                                                                     | X                       | Y         | Z         |
|    |                                                                                    |                                                                                     | -----                   |           |           |
|    |                                                                                    | C                                                                                   | 0.548287                | -0.409099 | -0.000149 |
|    |                                                                                    | C                                                                                   | 0.611002                | -1.564893 | 1.016869  |
|    |                                                                                    | H                                                                                   | 0.935796                | -2.500177 | 0.555593  |
|    |                                                                                    | H                                                                                   | 1.287623                | -1.328144 | 1.841587  |
|    |                                                                                    | H                                                                                   | -0.391281               | -1.720611 | 1.427284  |
|    |                                                                                    | C                                                                                   | -0.379132               | -0.789936 | -1.190981 |
|    |                                                                                    | H                                                                                   | -1.383210               | -0.974215 | -0.795201 |
|    |                                                                                    | H                                                                                   | -0.433727               | 0.023704  | -1.919047 |
|    |                                                                                    | H                                                                                   | -0.018707               | -1.691926 | -1.689582 |
|    |                                                                                    | C                                                                                   | 0.015226                | 0.869906  | 0.679256  |
|    |                                                                                    | H                                                                                   | 0.663426                | 1.165190  | 1.509602  |
|    |                                                                                    | H                                                                                   | -0.036017               | 1.696681  | -0.034398 |
|    |                                                                                    | H                                                                                   | -0.988606               | 0.683489  | 1.073631  |
|    |                                                                                    | N                                                                                   | 1.823383                | -0.000896 | -0.618049 |
|    |                                                                                    | S                                                                                   | 3.056586                | -1.128344 | -0.780443 |
|    |                                                                                    | O                                                                                   | 3.701100                | -1.291449 | 0.530249  |
|    |                                                                                    | O                                                                                   | 2.583273                | -2.307347 | -1.509015 |

|    |                                                                                     |                                                                                      |          |           |           |
|----|-------------------------------------------------------------------------------------|--------------------------------------------------------------------------------------|----------|-----------|-----------|
|    |                                                                                     | N                                                                                    | 4.075101 | -0.204810 | -1.814382 |
|    |                                                                                     | C                                                                                    | 5.151940 | -0.806096 | -2.490873 |
|    |                                                                                     | O                                                                                    | 5.879384 | -0.152909 | -3.219531 |
|    |                                                                                     | O                                                                                    | 5.251962 | -2.102763 | -2.209840 |
|    |                                                                                     | C                                                                                    | 6.238734 | -2.990017 | -2.885525 |
|    |                                                                                     | C                                                                                    | 7.658178 | -2.545720 | -2.524316 |
|    |                                                                                     | H                                                                                    | 8.371938 | -3.279814 | -2.912377 |
|    |                                                                                     | H                                                                                    | 7.893886 | -1.570382 | -2.952351 |
|    |                                                                                     | H                                                                                    | 7.777726 | -2.497357 | -1.437440 |
|    |                                                                                     | C                                                                                    | 5.982340 | -2.988659 | -4.394213 |
|    |                                                                                     | H                                                                                    | 6.203423 | -2.016855 | -4.838518 |
|    |                                                                                     | H                                                                                    | 6.624472 | -3.739785 | -4.865616 |
|    |                                                                                     | H                                                                                    | 4.940976 | -3.251013 | -4.605204 |
|    |                                                                                     | C                                                                                    | 5.916394 | -4.353859 | -2.272952 |
|    |                                                                                     | H                                                                                    | 4.883534 | -4.640535 | -2.488706 |
|    |                                                                                     | H                                                                                    | 6.586097 | -5.111491 | -2.691016 |
|    |                                                                                     | H                                                                                    | 6.050104 | -4.330894 | -1.187657 |
|    |                                                                                     | C                                                                                    | 4.110809 | 1.280399  | -1.694782 |
|    |                                                                                     | H                                                                                    | 3.697856 | 1.551488  | -0.722391 |
|    |                                                                                     | H                                                                                    | 5.165822 | 1.563598  | -1.703182 |
|    |                                                                                     | C                                                                                    | 3.357261 | 1.986216  | -2.822250 |
|    |                                                                                     | H                                                                                    | 3.771907 | 1.650943  | -3.778004 |
|    |                                                                                     | H                                                                                    | 2.305461 | 1.676967  | -2.791885 |
|    |                                                                                     | C                                                                                    | 3.458071 | 3.512675  | -2.692773 |
|    |                                                                                     | H                                                                                    | 4.513391 | 3.817582  | -2.758128 |
|    |                                                                                     | H                                                                                    | 3.115836 | 3.805929  | -1.689714 |
|    |                                                                                     | C                                                                                    | 2.645874 | 4.309237  | -3.734560 |
|    |                                                                                     | H                                                                                    | 1.602624 | 3.962118  | -3.677522 |
|    |                                                                                     | C                                                                                    | 3.142565 | 4.078488  | -5.170888 |
|    |                                                                                     | H                                                                                    | 4.191747 | 4.384729  | -5.272601 |
|    |                                                                                     | H                                                                                    | 3.071183 | 3.027994  | -5.469675 |
|    |                                                                                     | H                                                                                    | 2.554106 | 4.665491  | -5.885195 |
|    |                                                                                     | C                                                                                    | 2.659863 | 5.807772  | -3.393652 |
|    |                                                                                     | H                                                                                    | 2.052373 | 6.381384  | -4.102818 |
|    |                                                                                     | H                                                                                    | 2.266969 | 5.993115  | -2.387267 |
|    |                                                                                     | H                                                                                    | 3.681404 | 6.207335  | -3.432111 |
| 32 | 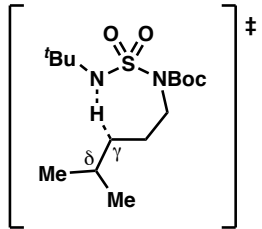 |  |          |           |           |
|    | Atom                                                                                | Coordinates (Angstroms)                                                              |          |           |           |

*Supporting Information for Sulfamides Direct Radical-Mediated Chlorination*

|   | X         | Y         | Z         |
|---|-----------|-----------|-----------|
| C | -1.667078 | 0.751226  | -0.282387 |
| C | -1.669479 | -0.425352 | 0.715184  |
| H | -0.984704 | 0.508482  | -1.102368 |
| H | -1.243425 | 1.623185  | 0.237101  |
| H | -0.746622 | -0.427408 | 1.290852  |
| H | -2.505436 | -0.349817 | 1.412076  |
| S | -3.174633 | -2.355313 | -0.714339 |
| O | -3.571422 | -3.621203 | -0.090913 |
| O | -2.943490 | -2.329852 | -2.163804 |
| N | -4.206176 | -1.152512 | -0.182590 |
| C | -5.681623 | -1.278495 | -0.445363 |
| C | -6.266295 | 0.117625  | -0.158109 |
| H | -5.936368 | 0.853779  | -0.896887 |
| H | -7.358079 | 0.065917  | -0.203197 |
| H | -5.979782 | 0.464449  | 0.839313  |
| C | -6.038255 | -1.707305 | -1.880317 |
| H | -5.695442 | -2.721627 | -2.099279 |
| H | -7.125920 | -1.684368 | -2.005134 |
| H | -5.593018 | -1.031941 | -2.616650 |
| C | -6.268751 | -2.273921 | 0.581670  |
| H | -6.005478 | -1.972744 | 1.599742  |
| H | -7.360119 | -2.273322 | 0.488420  |
| H | -5.900745 | -3.286587 | 0.414381  |
| H | -3.711116 | -0.008411 | -0.694744 |
| H | -1.729626 | -1.753455 | 0.063756  |
| C | -3.216408 | 1.753872  | -2.173668 |
| H | -4.296054 | 1.805120  | -2.373143 |
| C | -2.699276 | 3.211998  | -2.140143 |
| H | -2.891462 | 3.701542  | -3.101328 |
| H | -3.193032 | 3.798003  | -1.357236 |
| H | -1.618788 | 3.243133  | -1.959435 |
| C | -2.566582 | 0.966484  | -3.322507 |
| H | -1.473086 | 0.978103  | -3.252418 |
| H | -2.888934 | -0.078025 | -3.331741 |
| H | -2.833876 | 1.420081  | -4.282981 |
| C | -3.052815 | 1.116158  | -0.797410 |
| H | -3.627811 | 1.654317  | -0.033611 |
| C | -0.586875 | -2.515037 | -0.203625 |
| O | -0.626504 | -3.591619 | -0.769792 |
| O | 0.518226  | -1.901006 | 0.257079  |
| C | 1.857202  | -2.543736 | 0.161535  |
| C | 2.237601  | -2.732276 | -1.309342 |
| H | 1.592982  | -3.463163 | -1.798630 |
| H | 2.170093  | -1.781055 | -1.847042 |

|    |                                                                                   |                                                                                    |      |                         |           |           |
|----|-----------------------------------------------------------------------------------|------------------------------------------------------------------------------------|------|-------------------------|-----------|-----------|
|    |                                                                                   |                                                                                    | H    | 3.273337                | -3.082659 | -1.368743 |
|    |                                                                                   |                                                                                    | C    | 1.862046                | -3.857983 | 0.946613  |
|    |                                                                                   |                                                                                    | H    | 1.527331                | -3.690985 | 1.975486  |
|    |                                                                                   |                                                                                    | H    | 1.219206                | -4.605420 | 0.480493  |
|    |                                                                                   |                                                                                    | H    | 2.884235                | -4.248976 | 0.981761  |
|    |                                                                                   |                                                                                    | C    | 2.761177                | -1.505821 | 0.830298  |
|    |                                                                                   |                                                                                    | H    | 3.796460                | -1.859479 | 0.823024  |
|    |                                                                                   |                                                                                    | H    | 2.718550                | -0.551608 | 0.296430  |
|    |                                                                                   |                                                                                    | H    | 2.460344                | -1.339610 | 1.869170  |
| 33 | 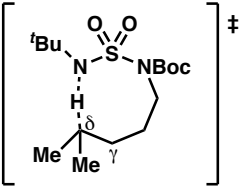 |  |      |                         |           |           |
|    |                                                                                   |                                                                                    | Atom | Coordinates (Angstroms) |           |           |
|    |                                                                                   |                                                                                    |      | X                       | Y         | Z         |
|    |                                                                                   |                                                                                    |      | -----                   |           |           |
|    |                                                                                   |                                                                                    | C    | 0.397665                | 4.696510  | 0.894806  |
|    |                                                                                   |                                                                                    | C    | 1.818723                | 4.756122  | 0.329636  |
|    |                                                                                   |                                                                                    | H    | 0.460800                | 4.430610  | 1.958511  |
|    |                                                                                   |                                                                                    | H    | 0.004659                | 5.726757  | 0.870781  |
|    |                                                                                   |                                                                                    | C    | -0.324383               | 2.281253  | 0.199330  |
|    |                                                                                   |                                                                                    | H    | 0.084510                | 1.956196  | 1.155124  |
|    |                                                                                   |                                                                                    | H    | -1.245773               | 1.727583  | 0.011042  |
|    |                                                                                   |                                                                                    | C    | -0.631948               | 3.785551  | 0.207737  |
|    |                                                                                   |                                                                                    | H    | -0.822524               | 4.111894  | -0.819456 |
|    |                                                                                   |                                                                                    | H    | -1.582455               | 3.909892  | 0.742204  |
|    |                                                                                   |                                                                                    | C    | 3.698248                | 2.012128  | 1.731287  |
|    |                                                                                   |                                                                                    | C    | 3.464032                | 2.795362  | 3.036143  |
|    |                                                                                   |                                                                                    | H    | 4.325171                | 2.663611  | 3.698704  |
|    |                                                                                   |                                                                                    | H    | 3.345323                | 3.863970  | 2.854598  |
|    |                                                                                   |                                                                                    | H    | 2.572013                | 2.426552  | 3.550956  |
|    |                                                                                   |                                                                                    | C    | 4.955943                | 2.531244  | 1.007657  |
|    |                                                                                   |                                                                                    | H    | 5.823024                | 2.437821  | 1.670075  |
|    |                                                                                   |                                                                                    | H    | 5.156807                | 1.965197  | 0.095363  |
|    |                                                                                   |                                                                                    | H    | 4.849500                | 3.584996  | 0.735380  |
|    |                                                                                   |                                                                                    | C    | 3.887129                | 0.523608  | 2.106656  |
|    |                                                                                   |                                                                                    | H    | 4.690932                | 0.463523  | 2.847897  |
|    |                                                                                   |                                                                                    | H    | 2.975667                | 0.112473  | 2.547974  |
|    |                                                                                   |                                                                                    | H    | 4.159442                | -0.091730 | 1.249294  |
|    |                                                                                   |                                                                                    | N    | 2.432949                | 2.204133  | 0.932571  |
|    |                                                                                   |                                                                                    | H    | 2.243490                | 3.535433  | 0.608401  |



Supporting Information for Sulfamides Direct Radical-Mediated Chlorination

|    |                                                                                     |                                                                                      |           |           |
|----|-------------------------------------------------------------------------------------|--------------------------------------------------------------------------------------|-----------|-----------|
|    | S                                                                                   | 2.256064                                                                             | 1.370395  | -0.511733 |
|    | O                                                                                   | 2.251778                                                                             | -0.074018 | -0.241693 |
|    | O                                                                                   | 3.130383                                                                             | 1.873478  | -1.577183 |
|    | N                                                                                   | 0.628478                                                                             | 1.874150  | -0.870673 |
|    | C                                                                                   | 2.695160                                                                             | 5.740171  | 1.094302  |
|    | H                                                                                   | 2.574831                                                                             | 5.657678  | 2.177773  |
|    | H                                                                                   | 3.755265                                                                             | 5.630117  | 0.846495  |
|    | H                                                                                   | 2.404478                                                                             | 6.763376  | 0.813675  |
|    | C                                                                                   | 1.941280                                                                             | 4.947277  | -1.173821 |
|    | H                                                                                   | 2.987324                                                                             | 4.925439  | -1.491997 |
|    | H                                                                                   | 1.398144                                                                             | 4.196012  | -1.746239 |
|    | H                                                                                   | 1.532093                                                                             | 5.934158  | -1.439749 |
|    | C                                                                                   | 0.045786                                                                             | 1.533544  | -2.101055 |
|    | O                                                                                   | -1.110557                                                                            | 1.834029  | -2.358060 |
|    | O                                                                                   | 0.888009                                                                             | 0.869038  | -2.889246 |
|    | C                                                                                   | 0.529112                                                                             | 0.462878  | -4.273391 |
|    | C                                                                                   | 1.816831                                                                             | -0.206715 | -4.756777 |
|    | H                                                                                   | 1.682235                                                                             | -0.564727 | -5.782066 |
|    | H                                                                                   | 2.650661                                                                             | 0.500356  | -4.738205 |
|    | H                                                                                   | 2.071398                                                                             | -1.058325 | -4.119657 |
|    | C                                                                                   | 0.207893                                                                             | 1.703263  | -5.111024 |
|    | H                                                                                   | 0.075175                                                                             | 1.404059  | -6.155920 |
|    | H                                                                                   | -0.706916                                                                            | 2.191047  | -4.771052 |
|    | H                                                                                   | 1.034768                                                                             | 2.418947  | -5.065393 |
|    | C                                                                                   | -0.628296                                                                            | -0.538345 | -4.230474 |
|    | H                                                                                   | -1.549047                                                                            | -0.070432 | -3.879008 |
|    | H                                                                                   | -0.798622                                                                            | -0.932590 | -5.237799 |
|    | H                                                                                   | -0.380879                                                                            | -1.378229 | -3.573742 |
| 34 | 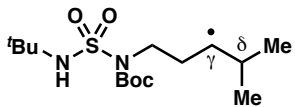 |  |           |           |
|    | Atom                                                                                | Coordinates (Angstroms)                                                              |           |           |
|    |                                                                                     | X                                                                                    | Y         | Z         |
|    |                                                                                     | -----                                                                                |           |           |
|    | C                                                                                   | 0.789932                                                                             | 0.074282  | 0.000101  |
|    | C                                                                                   | 0.498100                                                                             | -1.216092 | 0.787602  |
|    | H                                                                                   | 0.694162                                                                             | -1.089064 | 1.855758  |
|    | H                                                                                   | -0.543560                                                                            | -1.528524 | 0.665122  |
|    | H                                                                                   | 1.143638                                                                             | -2.021617 | 0.422488  |
|    | C                                                                                   | 2.240887                                                                             | 0.529543  | 0.211375  |
|    | H                                                                                   | 2.920941                                                                             | -0.264194 | -0.114714 |
|    | H                                                                                   | 2.448275                                                                             | 1.427705  | -0.376579 |

*Supporting Information for Sulfamides Direct Radical-Mediated Chlorination*

|   |           |           |           |
|---|-----------|-----------|-----------|
| H | 2.440906  | 0.750431  | 1.260975  |
| C | 0.533304  | -0.158937 | -1.499174 |
| H | -0.491268 | -0.504561 | -1.681182 |
| H | 0.702426  | 0.757419  | -2.073204 |
| H | 1.214624  | -0.929008 | -1.872210 |
| S | -0.518294 | 1.564884  | 1.960261  |
| O | -1.585755 | 0.700532  | 2.481366  |
| O | 0.726945  | 1.671121  | 2.713458  |
| N | -1.280478 | 3.093910  | 1.777404  |
| C | -0.620220 | 4.266702  | 1.366409  |
| O | -1.231410 | 5.315233  | 1.234988  |
| O | 0.679811  | 4.074679  | 1.162535  |
| C | 1.584886  | 5.204789  | 0.811093  |
| C | 1.567207  | 6.247677  | 1.931935  |
| H | 2.334009  | 7.002071  | 1.727933  |
| H | 0.599943  | 6.746671  | 2.002432  |
| H | 1.799613  | 5.778405  | 2.892985  |
| C | 1.184582  | 5.786968  | -0.546856 |
| H | 0.214467  | 6.283267  | -0.500010 |
| H | 1.937346  | 6.519028  | -0.857390 |
| H | 1.146745  | 4.997680  | -1.304416 |
| C | 2.949570  | 4.519339  | 0.732027  |
| H | 2.957109  | 3.757632  | -0.052133 |
| H | 3.718920  | 5.262194  | 0.500858  |
| H | 3.198245  | 4.041474  | 1.683528  |
| C | -2.729092 | 3.207108  | 2.092440  |
| H | -2.956320 | 2.495379  | 2.883975  |
| H | -2.872212 | 4.216589  | 2.478992  |
| C | -3.638403 | 2.972058  | 0.874741  |
| H | -3.271014 | 3.609604  | 0.051741  |
| H | -3.541283 | 1.931170  | 0.538034  |
| C | -6.415168 | 2.906067  | -0.923805 |
| H | -6.693426 | 3.962895  | -1.011379 |
| H | -5.503196 | 2.747754  | -1.509181 |
| H | -7.214684 | 2.304873  | -1.373355 |
| C | -7.513373 | 2.705491  | 1.356309  |
| H | -8.332012 | 2.129602  | 0.910623  |
| H | -7.395760 | 2.381889  | 2.395849  |
| H | -7.812944 | 3.760890  | 1.363868  |
| N | -0.146967 | 1.205998  | 0.359707  |
| H | -1.037258 | 1.108010  | -0.127858 |
| C | -5.071297 | 3.274947  | 1.179622  |
| H | -5.293166 | 4.216077  | 1.684269  |
| C | -6.209496 | 2.516259  | 0.563389  |
| H | -5.950132 | 1.445464  | 0.578379  |

|                                                                                                                                                                                                                                                                                                                                                                                                                                                                                                                                                                                                                                                                                                                                                                                                                                                                                                                                                                                                                                                                                                                                                                                                                                                                                                                                                                                                                                                                                                                                                                                                                                                                                                                                                                                                                                                                                                                                                                                                                                                                                                                                                                                                                                                                                                                                                                                                                                                                                                                                                                                                                                                                                                                                                                                                                                                                                                                                                                                                                                                                                                                                                                                                                                                                                                                                                                                                                                                                                                                                                                                                                                                                                                                                                                                                                                                                                                                                                                                                                                                                                                                                                                                                                                                                                                                                                                                                                                                                                                                                                                                                                                                                                                                                                                                                                                                                                                                                                                                                                                                                                                                                                                                                                                                                                                                                                                                                                                                                                                                                                                                                                                                                                                                                                                                                                                                                                                                                                                                                                                                                                                                                                                                                                                                                                                                                                                                                                                                                                                                                                                                                                                                                                                                                                                                                                                                                                                                                                                              |                                                                                   |                                                                                    |           |          |           |          |   |          |           |          |   |          |           |          |   |           |           |          |   |          |           |          |   |          |          |          |   |          |           |           |   |          |          |           |   |          |          |          |   |          |           |           |   |           |           |           |   |          |          |           |   |          |           |           |   |           |          |          |   |           |          |          |   |          |          |          |   |           |          |          |   |           |          |          |   |           |          |          |   |          |          |          |   |          |          |          |   |          |          |          |   |          |          |          |   |          |          |          |   |          |          |          |   |          |          |           |   |          |          |           |   |          |          |           |   |          |          |           |   |          |          |          |   |          |          |           |   |          |          |           |   |          |          |          |   |           |          |          |   |           |          |          |   |           |          |          |
|------------------------------------------------------------------------------------------------------------------------------------------------------------------------------------------------------------------------------------------------------------------------------------------------------------------------------------------------------------------------------------------------------------------------------------------------------------------------------------------------------------------------------------------------------------------------------------------------------------------------------------------------------------------------------------------------------------------------------------------------------------------------------------------------------------------------------------------------------------------------------------------------------------------------------------------------------------------------------------------------------------------------------------------------------------------------------------------------------------------------------------------------------------------------------------------------------------------------------------------------------------------------------------------------------------------------------------------------------------------------------------------------------------------------------------------------------------------------------------------------------------------------------------------------------------------------------------------------------------------------------------------------------------------------------------------------------------------------------------------------------------------------------------------------------------------------------------------------------------------------------------------------------------------------------------------------------------------------------------------------------------------------------------------------------------------------------------------------------------------------------------------------------------------------------------------------------------------------------------------------------------------------------------------------------------------------------------------------------------------------------------------------------------------------------------------------------------------------------------------------------------------------------------------------------------------------------------------------------------------------------------------------------------------------------------------------------------------------------------------------------------------------------------------------------------------------------------------------------------------------------------------------------------------------------------------------------------------------------------------------------------------------------------------------------------------------------------------------------------------------------------------------------------------------------------------------------------------------------------------------------------------------------------------------------------------------------------------------------------------------------------------------------------------------------------------------------------------------------------------------------------------------------------------------------------------------------------------------------------------------------------------------------------------------------------------------------------------------------------------------------------------------------------------------------------------------------------------------------------------------------------------------------------------------------------------------------------------------------------------------------------------------------------------------------------------------------------------------------------------------------------------------------------------------------------------------------------------------------------------------------------------------------------------------------------------------------------------------------------------------------------------------------------------------------------------------------------------------------------------------------------------------------------------------------------------------------------------------------------------------------------------------------------------------------------------------------------------------------------------------------------------------------------------------------------------------------------------------------------------------------------------------------------------------------------------------------------------------------------------------------------------------------------------------------------------------------------------------------------------------------------------------------------------------------------------------------------------------------------------------------------------------------------------------------------------------------------------------------------------------------------------------------------------------------------------------------------------------------------------------------------------------------------------------------------------------------------------------------------------------------------------------------------------------------------------------------------------------------------------------------------------------------------------------------------------------------------------------------------------------------------------------------------------------------------------------------------------------------------------------------------------------------------------------------------------------------------------------------------------------------------------------------------------------------------------------------------------------------------------------------------------------------------------------------------------------------------------------------------------------------------------------------------------------------------------------------------------------------------------------------------------------------------------------------------------------------------------------------------------------------------------------------------------------------------------------------------------------------------------------------------------------------------------------------------------------------------------------------------------------------------------------------------------------------------------------------------------------------|-----------------------------------------------------------------------------------|------------------------------------------------------------------------------------|-----------|----------|-----------|----------|---|----------|-----------|----------|---|----------|-----------|----------|---|-----------|-----------|----------|---|----------|-----------|----------|---|----------|----------|----------|---|----------|-----------|-----------|---|----------|----------|-----------|---|----------|----------|----------|---|----------|-----------|-----------|---|-----------|-----------|-----------|---|----------|----------|-----------|---|----------|-----------|-----------|---|-----------|----------|----------|---|-----------|----------|----------|---|----------|----------|----------|---|-----------|----------|----------|---|-----------|----------|----------|---|-----------|----------|----------|---|----------|----------|----------|---|----------|----------|----------|---|----------|----------|----------|---|----------|----------|----------|---|----------|----------|----------|---|----------|----------|----------|---|----------|----------|-----------|---|----------|----------|-----------|---|----------|----------|-----------|---|----------|----------|-----------|---|----------|----------|----------|---|----------|----------|-----------|---|----------|----------|-----------|---|----------|----------|----------|---|-----------|----------|----------|---|-----------|----------|----------|---|-----------|----------|----------|
| 35                                                                                                                                                                                                                                                                                                                                                                                                                                                                                                                                                                                                                                                                                                                                                                                                                                                                                                                                                                                                                                                                                                                                                                                                                                                                                                                                                                                                                                                                                                                                                                                                                                                                                                                                                                                                                                                                                                                                                                                                                                                                                                                                                                                                                                                                                                                                                                                                                                                                                                                                                                                                                                                                                                                                                                                                                                                                                                                                                                                                                                                                                                                                                                                                                                                                                                                                                                                                                                                                                                                                                                                                                                                                                                                                                                                                                                                                                                                                                                                                                                                                                                                                                                                                                                                                                                                                                                                                                                                                                                                                                                                                                                                                                                                                                                                                                                                                                                                                                                                                                                                                                                                                                                                                                                                                                                                                                                                                                                                                                                                                                                                                                                                                                                                                                                                                                                                                                                                                                                                                                                                                                                                                                                                                                                                                                                                                                                                                                                                                                                                                                                                                                                                                                                                                                                                                                                                                                                                                                                           | 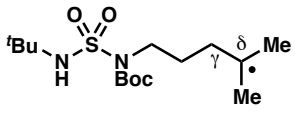 |  |           |          |           |          |   |          |           |          |   |          |           |          |   |           |           |          |   |          |           |          |   |          |          |          |   |          |           |           |   |          |          |           |   |          |          |          |   |          |           |           |   |           |           |           |   |          |          |           |   |          |           |           |   |           |          |          |   |           |          |          |   |          |          |          |   |           |          |          |   |           |          |          |   |           |          |          |   |          |          |          |   |          |          |          |   |          |          |          |   |          |          |          |   |          |          |          |   |          |          |          |   |          |          |           |   |          |          |           |   |          |          |           |   |          |          |           |   |          |          |          |   |          |          |           |   |          |          |           |   |          |          |          |   |           |          |          |   |           |          |          |   |           |          |          |
| <p style="text-align: center;">Atom                      Coordinates (Angstroms)</p> <p style="text-align: center;">                                  X                      Y                      Z</p> <p style="text-align: center;">-----</p>                                                                                                                                                                                                                                                                                                                                                                                                                                                                                                                                                                                                                                                                                                                                                                                                                                                                                                                                                                                                                                                                                                                                                                                                                                                                                                                                                                                                                                                                                                                                                                                                                                                                                                                                                                                                                                                                                                                                                                                                                                                                                                                                                                                                                                                                                                                                                                                                                                                                                                                                                                                                                                                                                                                                                                                                                                                                                                                                                                                                                                                                                                                                                                                                                                                                                                                                                                                                                                                                                                                                                                                                                                                                                                                                                                                                                                                                                                                                                                                                                                                                                                                                                                                                                                                                                                                                                                                                                                                                                                                                                                                                                                                                                                                                                                                                                                                                                                                                                                                                                                                                                                                                                                                                                                                                                                                                                                                                                                                                                                                                                                                                                                                                                                                                                                                                                                                                                                                                                                                                                                                                                                                                                                                                                                                                                                                                                                                                                                                                                                                                                                                                                                                                                                                           |                                                                                   |                                                                                    |           |          |           |          |   |          |           |          |   |          |           |          |   |           |           |          |   |          |           |          |   |          |          |          |   |          |           |           |   |          |          |           |   |          |          |          |   |          |           |           |   |           |           |           |   |          |          |           |   |          |           |           |   |           |          |          |   |           |          |          |   |          |          |          |   |           |          |          |   |           |          |          |   |           |          |          |   |          |          |          |   |          |          |          |   |          |          |          |   |          |          |          |   |          |          |          |   |          |          |          |   |          |          |           |   |          |          |           |   |          |          |           |   |          |          |           |   |          |          |          |   |          |          |           |   |          |          |           |   |          |          |          |   |           |          |          |   |           |          |          |   |           |          |          |
| <table style="width: 100%; border-collapse: collapse;"> <tbody> <tr><td style="text-align: center;">C</td><td style="text-align: center;">0.956946</td><td style="text-align: center;">-0.037207</td><td style="text-align: center;">0.000126</td></tr> <tr><td style="text-align: center;">C</td><td style="text-align: center;">0.755948</td><td style="text-align: center;">-1.280022</td><td style="text-align: center;">0.886193</td></tr> <tr><td style="text-align: center;">H</td><td style="text-align: center;">1.033560</td><td style="text-align: center;">-1.083350</td><td style="text-align: center;">1.925338</td></tr> <tr><td style="text-align: center;">H</td><td style="text-align: center;">-0.285456</td><td style="text-align: center;">-1.615508</td><td style="text-align: center;">0.866948</td></tr> <tr><td style="text-align: center;">H</td><td style="text-align: center;">1.386704</td><td style="text-align: center;">-2.096728</td><td style="text-align: center;">0.519999</td></tr> <tr><td style="text-align: center;">C</td><td style="text-align: center;">2.410241</td><td style="text-align: center;">0.453730</td><td style="text-align: center;">0.064709</td></tr> <tr><td style="text-align: center;">H</td><td style="text-align: center;">3.078448</td><td style="text-align: center;">-0.346761</td><td style="text-align: center;">-0.269269</td></tr> <tr><td style="text-align: center;">H</td><td style="text-align: center;">2.550241</td><td style="text-align: center;">1.318369</td><td style="text-align: center;">-0.589678</td></tr> <tr><td style="text-align: center;">H</td><td style="text-align: center;">2.690057</td><td style="text-align: center;">0.740214</td><td style="text-align: center;">1.079672</td></tr> <tr><td style="text-align: center;">C</td><td style="text-align: center;">0.586101</td><td style="text-align: center;">-0.368487</td><td style="text-align: center;">-1.456181</td></tr> <tr><td style="text-align: center;">H</td><td style="text-align: center;">-0.442522</td><td style="text-align: center;">-0.740561</td><td style="text-align: center;">-1.532413</td></tr> <tr><td style="text-align: center;">H</td><td style="text-align: center;">0.689721</td><td style="text-align: center;">0.512462</td><td style="text-align: center;">-2.097254</td></tr> <tr><td style="text-align: center;">H</td><td style="text-align: center;">1.251062</td><td style="text-align: center;">-1.149965</td><td style="text-align: center;">-1.835033</td></tr> <tr><td style="text-align: center;">S</td><td style="text-align: center;">-0.219612</td><td style="text-align: center;">1.557736</td><td style="text-align: center;">1.962771</td></tr> <tr><td style="text-align: center;">O</td><td style="text-align: center;">-1.220592</td><td style="text-align: center;">0.711093</td><td style="text-align: center;">2.625914</td></tr> <tr><td style="text-align: center;">O</td><td style="text-align: center;">1.080025</td><td style="text-align: center;">1.736381</td><td style="text-align: center;">2.601830</td></tr> <tr><td style="text-align: center;">N</td><td style="text-align: center;">-1.027794</td><td style="text-align: center;">3.058722</td><td style="text-align: center;">1.747709</td></tr> <tr><td style="text-align: center;">C</td><td style="text-align: center;">-0.424760</td><td style="text-align: center;">4.216983</td><td style="text-align: center;">1.224332</td></tr> <tr><td style="text-align: center;">O</td><td style="text-align: center;">-1.061632</td><td style="text-align: center;">5.250189</td><td style="text-align: center;">1.093223</td></tr> <tr><td style="text-align: center;">O</td><td style="text-align: center;">0.856057</td><td style="text-align: center;">4.029988</td><td style="text-align: center;">0.918823</td></tr> <tr><td style="text-align: center;">C</td><td style="text-align: center;">1.713766</td><td style="text-align: center;">5.152736</td><td style="text-align: center;">0.447532</td></tr> <tr><td style="text-align: center;">C</td><td style="text-align: center;">1.775332</td><td style="text-align: center;">6.240548</td><td style="text-align: center;">1.523202</td></tr> <tr><td style="text-align: center;">H</td><td style="text-align: center;">2.511928</td><td style="text-align: center;">6.994174</td><td style="text-align: center;">1.226192</td></tr> <tr><td style="text-align: center;">H</td><td style="text-align: center;">0.810317</td><td style="text-align: center;">6.731747</td><td style="text-align: center;">1.654276</td></tr> <tr><td style="text-align: center;">H</td><td style="text-align: center;">2.093120</td><td style="text-align: center;">5.813407</td><td style="text-align: center;">2.479457</td></tr> <tr><td style="text-align: center;">C</td><td style="text-align: center;">1.194965</td><td style="text-align: center;">5.674405</td><td style="text-align: center;">-0.894987</td></tr> <tr><td style="text-align: center;">H</td><td style="text-align: center;">0.227382</td><td style="text-align: center;">6.166154</td><td style="text-align: center;">-0.787497</td></tr> <tr><td style="text-align: center;">H</td><td style="text-align: center;">1.911749</td><td style="text-align: center;">6.397019</td><td style="text-align: center;">-1.298819</td></tr> <tr><td style="text-align: center;">H</td><td style="text-align: center;">1.101013</td><td style="text-align: center;">4.853144</td><td style="text-align: center;">-1.612639</td></tr> <tr><td style="text-align: center;">C</td><td style="text-align: center;">3.075694</td><td style="text-align: center;">4.476992</td><td style="text-align: center;">0.282440</td></tr> <tr><td style="text-align: center;">H</td><td style="text-align: center;">3.028437</td><td style="text-align: center;">3.686566</td><td style="text-align: center;">-0.471426</td></tr> <tr><td style="text-align: center;">H</td><td style="text-align: center;">3.815258</td><td style="text-align: center;">5.217158</td><td style="text-align: center;">-0.037515</td></tr> <tr><td style="text-align: center;">H</td><td style="text-align: center;">3.405940</td><td style="text-align: center;">4.036588</td><td style="text-align: center;">1.227136</td></tr> <tr><td style="text-align: center;">C</td><td style="text-align: center;">-2.460496</td><td style="text-align: center;">3.157112</td><td style="text-align: center;">2.134222</td></tr> <tr><td style="text-align: center;">H</td><td style="text-align: center;">-2.623702</td><td style="text-align: center;">2.477303</td><td style="text-align: center;">2.969723</td></tr> <tr><td style="text-align: center;">H</td><td style="text-align: center;">-2.603928</td><td style="text-align: center;">4.179460</td><td style="text-align: center;">2.486957</td></tr> </tbody> </table> |                                                                                   |                                                                                    | C         | 0.956946 | -0.037207 | 0.000126 | C | 0.755948 | -1.280022 | 0.886193 | H | 1.033560 | -1.083350 | 1.925338 | H | -0.285456 | -1.615508 | 0.866948 | H | 1.386704 | -2.096728 | 0.519999 | C | 2.410241 | 0.453730 | 0.064709 | H | 3.078448 | -0.346761 | -0.269269 | H | 2.550241 | 1.318369 | -0.589678 | H | 2.690057 | 0.740214 | 1.079672 | C | 0.586101 | -0.368487 | -1.456181 | H | -0.442522 | -0.740561 | -1.532413 | H | 0.689721 | 0.512462 | -2.097254 | H | 1.251062 | -1.149965 | -1.835033 | S | -0.219612 | 1.557736 | 1.962771 | O | -1.220592 | 0.711093 | 2.625914 | O | 1.080025 | 1.736381 | 2.601830 | N | -1.027794 | 3.058722 | 1.747709 | C | -0.424760 | 4.216983 | 1.224332 | O | -1.061632 | 5.250189 | 1.093223 | O | 0.856057 | 4.029988 | 0.918823 | C | 1.713766 | 5.152736 | 0.447532 | C | 1.775332 | 6.240548 | 1.523202 | H | 2.511928 | 6.994174 | 1.226192 | H | 0.810317 | 6.731747 | 1.654276 | H | 2.093120 | 5.813407 | 2.479457 | C | 1.194965 | 5.674405 | -0.894987 | H | 0.227382 | 6.166154 | -0.787497 | H | 1.911749 | 6.397019 | -1.298819 | H | 1.101013 | 4.853144 | -1.612639 | C | 3.075694 | 4.476992 | 0.282440 | H | 3.028437 | 3.686566 | -0.471426 | H | 3.815258 | 5.217158 | -0.037515 | H | 3.405940 | 4.036588 | 1.227136 | C | -2.460496 | 3.157112 | 2.134222 | H | -2.623702 | 2.477303 | 2.969723 | H | -2.603928 | 4.179460 | 2.486957 |
| C                                                                                                                                                                                                                                                                                                                                                                                                                                                                                                                                                                                                                                                                                                                                                                                                                                                                                                                                                                                                                                                                                                                                                                                                                                                                                                                                                                                                                                                                                                                                                                                                                                                                                                                                                                                                                                                                                                                                                                                                                                                                                                                                                                                                                                                                                                                                                                                                                                                                                                                                                                                                                                                                                                                                                                                                                                                                                                                                                                                                                                                                                                                                                                                                                                                                                                                                                                                                                                                                                                                                                                                                                                                                                                                                                                                                                                                                                                                                                                                                                                                                                                                                                                                                                                                                                                                                                                                                                                                                                                                                                                                                                                                                                                                                                                                                                                                                                                                                                                                                                                                                                                                                                                                                                                                                                                                                                                                                                                                                                                                                                                                                                                                                                                                                                                                                                                                                                                                                                                                                                                                                                                                                                                                                                                                                                                                                                                                                                                                                                                                                                                                                                                                                                                                                                                                                                                                                                                                                                                            | 0.956946                                                                          | -0.037207                                                                          | 0.000126  |          |           |          |   |          |           |          |   |          |           |          |   |           |           |          |   |          |           |          |   |          |          |          |   |          |           |           |   |          |          |           |   |          |          |          |   |          |           |           |   |           |           |           |   |          |          |           |   |          |           |           |   |           |          |          |   |           |          |          |   |          |          |          |   |           |          |          |   |           |          |          |   |           |          |          |   |          |          |          |   |          |          |          |   |          |          |          |   |          |          |          |   |          |          |          |   |          |          |          |   |          |          |           |   |          |          |           |   |          |          |           |   |          |          |           |   |          |          |          |   |          |          |           |   |          |          |           |   |          |          |          |   |           |          |          |   |           |          |          |   |           |          |          |
| C                                                                                                                                                                                                                                                                                                                                                                                                                                                                                                                                                                                                                                                                                                                                                                                                                                                                                                                                                                                                                                                                                                                                                                                                                                                                                                                                                                                                                                                                                                                                                                                                                                                                                                                                                                                                                                                                                                                                                                                                                                                                                                                                                                                                                                                                                                                                                                                                                                                                                                                                                                                                                                                                                                                                                                                                                                                                                                                                                                                                                                                                                                                                                                                                                                                                                                                                                                                                                                                                                                                                                                                                                                                                                                                                                                                                                                                                                                                                                                                                                                                                                                                                                                                                                                                                                                                                                                                                                                                                                                                                                                                                                                                                                                                                                                                                                                                                                                                                                                                                                                                                                                                                                                                                                                                                                                                                                                                                                                                                                                                                                                                                                                                                                                                                                                                                                                                                                                                                                                                                                                                                                                                                                                                                                                                                                                                                                                                                                                                                                                                                                                                                                                                                                                                                                                                                                                                                                                                                                                            | 0.755948                                                                          | -1.280022                                                                          | 0.886193  |          |           |          |   |          |           |          |   |          |           |          |   |           |           |          |   |          |           |          |   |          |          |          |   |          |           |           |   |          |          |           |   |          |          |          |   |          |           |           |   |           |           |           |   |          |          |           |   |          |           |           |   |           |          |          |   |           |          |          |   |          |          |          |   |           |          |          |   |           |          |          |   |           |          |          |   |          |          |          |   |          |          |          |   |          |          |          |   |          |          |          |   |          |          |          |   |          |          |          |   |          |          |           |   |          |          |           |   |          |          |           |   |          |          |           |   |          |          |          |   |          |          |           |   |          |          |           |   |          |          |          |   |           |          |          |   |           |          |          |   |           |          |          |
| H                                                                                                                                                                                                                                                                                                                                                                                                                                                                                                                                                                                                                                                                                                                                                                                                                                                                                                                                                                                                                                                                                                                                                                                                                                                                                                                                                                                                                                                                                                                                                                                                                                                                                                                                                                                                                                                                                                                                                                                                                                                                                                                                                                                                                                                                                                                                                                                                                                                                                                                                                                                                                                                                                                                                                                                                                                                                                                                                                                                                                                                                                                                                                                                                                                                                                                                                                                                                                                                                                                                                                                                                                                                                                                                                                                                                                                                                                                                                                                                                                                                                                                                                                                                                                                                                                                                                                                                                                                                                                                                                                                                                                                                                                                                                                                                                                                                                                                                                                                                                                                                                                                                                                                                                                                                                                                                                                                                                                                                                                                                                                                                                                                                                                                                                                                                                                                                                                                                                                                                                                                                                                                                                                                                                                                                                                                                                                                                                                                                                                                                                                                                                                                                                                                                                                                                                                                                                                                                                                                            | 1.033560                                                                          | -1.083350                                                                          | 1.925338  |          |           |          |   |          |           |          |   |          |           |          |   |           |           |          |   |          |           |          |   |          |          |          |   |          |           |           |   |          |          |           |   |          |          |          |   |          |           |           |   |           |           |           |   |          |          |           |   |          |           |           |   |           |          |          |   |           |          |          |   |          |          |          |   |           |          |          |   |           |          |          |   |           |          |          |   |          |          |          |   |          |          |          |   |          |          |          |   |          |          |          |   |          |          |          |   |          |          |          |   |          |          |           |   |          |          |           |   |          |          |           |   |          |          |           |   |          |          |          |   |          |          |           |   |          |          |           |   |          |          |          |   |           |          |          |   |           |          |          |   |           |          |          |
| H                                                                                                                                                                                                                                                                                                                                                                                                                                                                                                                                                                                                                                                                                                                                                                                                                                                                                                                                                                                                                                                                                                                                                                                                                                                                                                                                                                                                                                                                                                                                                                                                                                                                                                                                                                                                                                                                                                                                                                                                                                                                                                                                                                                                                                                                                                                                                                                                                                                                                                                                                                                                                                                                                                                                                                                                                                                                                                                                                                                                                                                                                                                                                                                                                                                                                                                                                                                                                                                                                                                                                                                                                                                                                                                                                                                                                                                                                                                                                                                                                                                                                                                                                                                                                                                                                                                                                                                                                                                                                                                                                                                                                                                                                                                                                                                                                                                                                                                                                                                                                                                                                                                                                                                                                                                                                                                                                                                                                                                                                                                                                                                                                                                                                                                                                                                                                                                                                                                                                                                                                                                                                                                                                                                                                                                                                                                                                                                                                                                                                                                                                                                                                                                                                                                                                                                                                                                                                                                                                                            | -0.285456                                                                         | -1.615508                                                                          | 0.866948  |          |           |          |   |          |           |          |   |          |           |          |   |           |           |          |   |          |           |          |   |          |          |          |   |          |           |           |   |          |          |           |   |          |          |          |   |          |           |           |   |           |           |           |   |          |          |           |   |          |           |           |   |           |          |          |   |           |          |          |   |          |          |          |   |           |          |          |   |           |          |          |   |           |          |          |   |          |          |          |   |          |          |          |   |          |          |          |   |          |          |          |   |          |          |          |   |          |          |          |   |          |          |           |   |          |          |           |   |          |          |           |   |          |          |           |   |          |          |          |   |          |          |           |   |          |          |           |   |          |          |          |   |           |          |          |   |           |          |          |   |           |          |          |
| H                                                                                                                                                                                                                                                                                                                                                                                                                                                                                                                                                                                                                                                                                                                                                                                                                                                                                                                                                                                                                                                                                                                                                                                                                                                                                                                                                                                                                                                                                                                                                                                                                                                                                                                                                                                                                                                                                                                                                                                                                                                                                                                                                                                                                                                                                                                                                                                                                                                                                                                                                                                                                                                                                                                                                                                                                                                                                                                                                                                                                                                                                                                                                                                                                                                                                                                                                                                                                                                                                                                                                                                                                                                                                                                                                                                                                                                                                                                                                                                                                                                                                                                                                                                                                                                                                                                                                                                                                                                                                                                                                                                                                                                                                                                                                                                                                                                                                                                                                                                                                                                                                                                                                                                                                                                                                                                                                                                                                                                                                                                                                                                                                                                                                                                                                                                                                                                                                                                                                                                                                                                                                                                                                                                                                                                                                                                                                                                                                                                                                                                                                                                                                                                                                                                                                                                                                                                                                                                                                                            | 1.386704                                                                          | -2.096728                                                                          | 0.519999  |          |           |          |   |          |           |          |   |          |           |          |   |           |           |          |   |          |           |          |   |          |          |          |   |          |           |           |   |          |          |           |   |          |          |          |   |          |           |           |   |           |           |           |   |          |          |           |   |          |           |           |   |           |          |          |   |           |          |          |   |          |          |          |   |           |          |          |   |           |          |          |   |           |          |          |   |          |          |          |   |          |          |          |   |          |          |          |   |          |          |          |   |          |          |          |   |          |          |          |   |          |          |           |   |          |          |           |   |          |          |           |   |          |          |           |   |          |          |          |   |          |          |           |   |          |          |           |   |          |          |          |   |           |          |          |   |           |          |          |   |           |          |          |
| C                                                                                                                                                                                                                                                                                                                                                                                                                                                                                                                                                                                                                                                                                                                                                                                                                                                                                                                                                                                                                                                                                                                                                                                                                                                                                                                                                                                                                                                                                                                                                                                                                                                                                                                                                                                                                                                                                                                                                                                                                                                                                                                                                                                                                                                                                                                                                                                                                                                                                                                                                                                                                                                                                                                                                                                                                                                                                                                                                                                                                                                                                                                                                                                                                                                                                                                                                                                                                                                                                                                                                                                                                                                                                                                                                                                                                                                                                                                                                                                                                                                                                                                                                                                                                                                                                                                                                                                                                                                                                                                                                                                                                                                                                                                                                                                                                                                                                                                                                                                                                                                                                                                                                                                                                                                                                                                                                                                                                                                                                                                                                                                                                                                                                                                                                                                                                                                                                                                                                                                                                                                                                                                                                                                                                                                                                                                                                                                                                                                                                                                                                                                                                                                                                                                                                                                                                                                                                                                                                                            | 2.410241                                                                          | 0.453730                                                                           | 0.064709  |          |           |          |   |          |           |          |   |          |           |          |   |           |           |          |   |          |           |          |   |          |          |          |   |          |           |           |   |          |          |           |   |          |          |          |   |          |           |           |   |           |           |           |   |          |          |           |   |          |           |           |   |           |          |          |   |           |          |          |   |          |          |          |   |           |          |          |   |           |          |          |   |           |          |          |   |          |          |          |   |          |          |          |   |          |          |          |   |          |          |          |   |          |          |          |   |          |          |          |   |          |          |           |   |          |          |           |   |          |          |           |   |          |          |           |   |          |          |          |   |          |          |           |   |          |          |           |   |          |          |          |   |           |          |          |   |           |          |          |   |           |          |          |
| H                                                                                                                                                                                                                                                                                                                                                                                                                                                                                                                                                                                                                                                                                                                                                                                                                                                                                                                                                                                                                                                                                                                                                                                                                                                                                                                                                                                                                                                                                                                                                                                                                                                                                                                                                                                                                                                                                                                                                                                                                                                                                                                                                                                                                                                                                                                                                                                                                                                                                                                                                                                                                                                                                                                                                                                                                                                                                                                                                                                                                                                                                                                                                                                                                                                                                                                                                                                                                                                                                                                                                                                                                                                                                                                                                                                                                                                                                                                                                                                                                                                                                                                                                                                                                                                                                                                                                                                                                                                                                                                                                                                                                                                                                                                                                                                                                                                                                                                                                                                                                                                                                                                                                                                                                                                                                                                                                                                                                                                                                                                                                                                                                                                                                                                                                                                                                                                                                                                                                                                                                                                                                                                                                                                                                                                                                                                                                                                                                                                                                                                                                                                                                                                                                                                                                                                                                                                                                                                                                                            | 3.078448                                                                          | -0.346761                                                                          | -0.269269 |          |           |          |   |          |           |          |   |          |           |          |   |           |           |          |   |          |           |          |   |          |          |          |   |          |           |           |   |          |          |           |   |          |          |          |   |          |           |           |   |           |           |           |   |          |          |           |   |          |           |           |   |           |          |          |   |           |          |          |   |          |          |          |   |           |          |          |   |           |          |          |   |           |          |          |   |          |          |          |   |          |          |          |   |          |          |          |   |          |          |          |   |          |          |          |   |          |          |          |   |          |          |           |   |          |          |           |   |          |          |           |   |          |          |           |   |          |          |          |   |          |          |           |   |          |          |           |   |          |          |          |   |           |          |          |   |           |          |          |   |           |          |          |
| H                                                                                                                                                                                                                                                                                                                                                                                                                                                                                                                                                                                                                                                                                                                                                                                                                                                                                                                                                                                                                                                                                                                                                                                                                                                                                                                                                                                                                                                                                                                                                                                                                                                                                                                                                                                                                                                                                                                                                                                                                                                                                                                                                                                                                                                                                                                                                                                                                                                                                                                                                                                                                                                                                                                                                                                                                                                                                                                                                                                                                                                                                                                                                                                                                                                                                                                                                                                                                                                                                                                                                                                                                                                                                                                                                                                                                                                                                                                                                                                                                                                                                                                                                                                                                                                                                                                                                                                                                                                                                                                                                                                                                                                                                                                                                                                                                                                                                                                                                                                                                                                                                                                                                                                                                                                                                                                                                                                                                                                                                                                                                                                                                                                                                                                                                                                                                                                                                                                                                                                                                                                                                                                                                                                                                                                                                                                                                                                                                                                                                                                                                                                                                                                                                                                                                                                                                                                                                                                                                                            | 2.550241                                                                          | 1.318369                                                                           | -0.589678 |          |           |          |   |          |           |          |   |          |           |          |   |           |           |          |   |          |           |          |   |          |          |          |   |          |           |           |   |          |          |           |   |          |          |          |   |          |           |           |   |           |           |           |   |          |          |           |   |          |           |           |   |           |          |          |   |           |          |          |   |          |          |          |   |           |          |          |   |           |          |          |   |           |          |          |   |          |          |          |   |          |          |          |   |          |          |          |   |          |          |          |   |          |          |          |   |          |          |          |   |          |          |           |   |          |          |           |   |          |          |           |   |          |          |           |   |          |          |          |   |          |          |           |   |          |          |           |   |          |          |          |   |           |          |          |   |           |          |          |   |           |          |          |
| H                                                                                                                                                                                                                                                                                                                                                                                                                                                                                                                                                                                                                                                                                                                                                                                                                                                                                                                                                                                                                                                                                                                                                                                                                                                                                                                                                                                                                                                                                                                                                                                                                                                                                                                                                                                                                                                                                                                                                                                                                                                                                                                                                                                                                                                                                                                                                                                                                                                                                                                                                                                                                                                                                                                                                                                                                                                                                                                                                                                                                                                                                                                                                                                                                                                                                                                                                                                                                                                                                                                                                                                                                                                                                                                                                                                                                                                                                                                                                                                                                                                                                                                                                                                                                                                                                                                                                                                                                                                                                                                                                                                                                                                                                                                                                                                                                                                                                                                                                                                                                                                                                                                                                                                                                                                                                                                                                                                                                                                                                                                                                                                                                                                                                                                                                                                                                                                                                                                                                                                                                                                                                                                                                                                                                                                                                                                                                                                                                                                                                                                                                                                                                                                                                                                                                                                                                                                                                                                                                                            | 2.690057                                                                          | 0.740214                                                                           | 1.079672  |          |           |          |   |          |           |          |   |          |           |          |   |           |           |          |   |          |           |          |   |          |          |          |   |          |           |           |   |          |          |           |   |          |          |          |   |          |           |           |   |           |           |           |   |          |          |           |   |          |           |           |   |           |          |          |   |           |          |          |   |          |          |          |   |           |          |          |   |           |          |          |   |           |          |          |   |          |          |          |   |          |          |          |   |          |          |          |   |          |          |          |   |          |          |          |   |          |          |          |   |          |          |           |   |          |          |           |   |          |          |           |   |          |          |           |   |          |          |          |   |          |          |           |   |          |          |           |   |          |          |          |   |           |          |          |   |           |          |          |   |           |          |          |
| C                                                                                                                                                                                                                                                                                                                                                                                                                                                                                                                                                                                                                                                                                                                                                                                                                                                                                                                                                                                                                                                                                                                                                                                                                                                                                                                                                                                                                                                                                                                                                                                                                                                                                                                                                                                                                                                                                                                                                                                                                                                                                                                                                                                                                                                                                                                                                                                                                                                                                                                                                                                                                                                                                                                                                                                                                                                                                                                                                                                                                                                                                                                                                                                                                                                                                                                                                                                                                                                                                                                                                                                                                                                                                                                                                                                                                                                                                                                                                                                                                                                                                                                                                                                                                                                                                                                                                                                                                                                                                                                                                                                                                                                                                                                                                                                                                                                                                                                                                                                                                                                                                                                                                                                                                                                                                                                                                                                                                                                                                                                                                                                                                                                                                                                                                                                                                                                                                                                                                                                                                                                                                                                                                                                                                                                                                                                                                                                                                                                                                                                                                                                                                                                                                                                                                                                                                                                                                                                                                                            | 0.586101                                                                          | -0.368487                                                                          | -1.456181 |          |           |          |   |          |           |          |   |          |           |          |   |           |           |          |   |          |           |          |   |          |          |          |   |          |           |           |   |          |          |           |   |          |          |          |   |          |           |           |   |           |           |           |   |          |          |           |   |          |           |           |   |           |          |          |   |           |          |          |   |          |          |          |   |           |          |          |   |           |          |          |   |           |          |          |   |          |          |          |   |          |          |          |   |          |          |          |   |          |          |          |   |          |          |          |   |          |          |          |   |          |          |           |   |          |          |           |   |          |          |           |   |          |          |           |   |          |          |          |   |          |          |           |   |          |          |           |   |          |          |          |   |           |          |          |   |           |          |          |   |           |          |          |
| H                                                                                                                                                                                                                                                                                                                                                                                                                                                                                                                                                                                                                                                                                                                                                                                                                                                                                                                                                                                                                                                                                                                                                                                                                                                                                                                                                                                                                                                                                                                                                                                                                                                                                                                                                                                                                                                                                                                                                                                                                                                                                                                                                                                                                                                                                                                                                                                                                                                                                                                                                                                                                                                                                                                                                                                                                                                                                                                                                                                                                                                                                                                                                                                                                                                                                                                                                                                                                                                                                                                                                                                                                                                                                                                                                                                                                                                                                                                                                                                                                                                                                                                                                                                                                                                                                                                                                                                                                                                                                                                                                                                                                                                                                                                                                                                                                                                                                                                                                                                                                                                                                                                                                                                                                                                                                                                                                                                                                                                                                                                                                                                                                                                                                                                                                                                                                                                                                                                                                                                                                                                                                                                                                                                                                                                                                                                                                                                                                                                                                                                                                                                                                                                                                                                                                                                                                                                                                                                                                                            | -0.442522                                                                         | -0.740561                                                                          | -1.532413 |          |           |          |   |          |           |          |   |          |           |          |   |           |           |          |   |          |           |          |   |          |          |          |   |          |           |           |   |          |          |           |   |          |          |          |   |          |           |           |   |           |           |           |   |          |          |           |   |          |           |           |   |           |          |          |   |           |          |          |   |          |          |          |   |           |          |          |   |           |          |          |   |           |          |          |   |          |          |          |   |          |          |          |   |          |          |          |   |          |          |          |   |          |          |          |   |          |          |          |   |          |          |           |   |          |          |           |   |          |          |           |   |          |          |           |   |          |          |          |   |          |          |           |   |          |          |           |   |          |          |          |   |           |          |          |   |           |          |          |   |           |          |          |
| H                                                                                                                                                                                                                                                                                                                                                                                                                                                                                                                                                                                                                                                                                                                                                                                                                                                                                                                                                                                                                                                                                                                                                                                                                                                                                                                                                                                                                                                                                                                                                                                                                                                                                                                                                                                                                                                                                                                                                                                                                                                                                                                                                                                                                                                                                                                                                                                                                                                                                                                                                                                                                                                                                                                                                                                                                                                                                                                                                                                                                                                                                                                                                                                                                                                                                                                                                                                                                                                                                                                                                                                                                                                                                                                                                                                                                                                                                                                                                                                                                                                                                                                                                                                                                                                                                                                                                                                                                                                                                                                                                                                                                                                                                                                                                                                                                                                                                                                                                                                                                                                                                                                                                                                                                                                                                                                                                                                                                                                                                                                                                                                                                                                                                                                                                                                                                                                                                                                                                                                                                                                                                                                                                                                                                                                                                                                                                                                                                                                                                                                                                                                                                                                                                                                                                                                                                                                                                                                                                                            | 0.689721                                                                          | 0.512462                                                                           | -2.097254 |          |           |          |   |          |           |          |   |          |           |          |   |           |           |          |   |          |           |          |   |          |          |          |   |          |           |           |   |          |          |           |   |          |          |          |   |          |           |           |   |           |           |           |   |          |          |           |   |          |           |           |   |           |          |          |   |           |          |          |   |          |          |          |   |           |          |          |   |           |          |          |   |           |          |          |   |          |          |          |   |          |          |          |   |          |          |          |   |          |          |          |   |          |          |          |   |          |          |          |   |          |          |           |   |          |          |           |   |          |          |           |   |          |          |           |   |          |          |          |   |          |          |           |   |          |          |           |   |          |          |          |   |           |          |          |   |           |          |          |   |           |          |          |
| H                                                                                                                                                                                                                                                                                                                                                                                                                                                                                                                                                                                                                                                                                                                                                                                                                                                                                                                                                                                                                                                                                                                                                                                                                                                                                                                                                                                                                                                                                                                                                                                                                                                                                                                                                                                                                                                                                                                                                                                                                                                                                                                                                                                                                                                                                                                                                                                                                                                                                                                                                                                                                                                                                                                                                                                                                                                                                                                                                                                                                                                                                                                                                                                                                                                                                                                                                                                                                                                                                                                                                                                                                                                                                                                                                                                                                                                                                                                                                                                                                                                                                                                                                                                                                                                                                                                                                                                                                                                                                                                                                                                                                                                                                                                                                                                                                                                                                                                                                                                                                                                                                                                                                                                                                                                                                                                                                                                                                                                                                                                                                                                                                                                                                                                                                                                                                                                                                                                                                                                                                                                                                                                                                                                                                                                                                                                                                                                                                                                                                                                                                                                                                                                                                                                                                                                                                                                                                                                                                                            | 1.251062                                                                          | -1.149965                                                                          | -1.835033 |          |           |          |   |          |           |          |   |          |           |          |   |           |           |          |   |          |           |          |   |          |          |          |   |          |           |           |   |          |          |           |   |          |          |          |   |          |           |           |   |           |           |           |   |          |          |           |   |          |           |           |   |           |          |          |   |           |          |          |   |          |          |          |   |           |          |          |   |           |          |          |   |           |          |          |   |          |          |          |   |          |          |          |   |          |          |          |   |          |          |          |   |          |          |          |   |          |          |          |   |          |          |           |   |          |          |           |   |          |          |           |   |          |          |           |   |          |          |          |   |          |          |           |   |          |          |           |   |          |          |          |   |           |          |          |   |           |          |          |   |           |          |          |
| S                                                                                                                                                                                                                                                                                                                                                                                                                                                                                                                                                                                                                                                                                                                                                                                                                                                                                                                                                                                                                                                                                                                                                                                                                                                                                                                                                                                                                                                                                                                                                                                                                                                                                                                                                                                                                                                                                                                                                                                                                                                                                                                                                                                                                                                                                                                                                                                                                                                                                                                                                                                                                                                                                                                                                                                                                                                                                                                                                                                                                                                                                                                                                                                                                                                                                                                                                                                                                                                                                                                                                                                                                                                                                                                                                                                                                                                                                                                                                                                                                                                                                                                                                                                                                                                                                                                                                                                                                                                                                                                                                                                                                                                                                                                                                                                                                                                                                                                                                                                                                                                                                                                                                                                                                                                                                                                                                                                                                                                                                                                                                                                                                                                                                                                                                                                                                                                                                                                                                                                                                                                                                                                                                                                                                                                                                                                                                                                                                                                                                                                                                                                                                                                                                                                                                                                                                                                                                                                                                                            | -0.219612                                                                         | 1.557736                                                                           | 1.962771  |          |           |          |   |          |           |          |   |          |           |          |   |           |           |          |   |          |           |          |   |          |          |          |   |          |           |           |   |          |          |           |   |          |          |          |   |          |           |           |   |           |           |           |   |          |          |           |   |          |           |           |   |           |          |          |   |           |          |          |   |          |          |          |   |           |          |          |   |           |          |          |   |           |          |          |   |          |          |          |   |          |          |          |   |          |          |          |   |          |          |          |   |          |          |          |   |          |          |          |   |          |          |           |   |          |          |           |   |          |          |           |   |          |          |           |   |          |          |          |   |          |          |           |   |          |          |           |   |          |          |          |   |           |          |          |   |           |          |          |   |           |          |          |
| O                                                                                                                                                                                                                                                                                                                                                                                                                                                                                                                                                                                                                                                                                                                                                                                                                                                                                                                                                                                                                                                                                                                                                                                                                                                                                                                                                                                                                                                                                                                                                                                                                                                                                                                                                                                                                                                                                                                                                                                                                                                                                                                                                                                                                                                                                                                                                                                                                                                                                                                                                                                                                                                                                                                                                                                                                                                                                                                                                                                                                                                                                                                                                                                                                                                                                                                                                                                                                                                                                                                                                                                                                                                                                                                                                                                                                                                                                                                                                                                                                                                                                                                                                                                                                                                                                                                                                                                                                                                                                                                                                                                                                                                                                                                                                                                                                                                                                                                                                                                                                                                                                                                                                                                                                                                                                                                                                                                                                                                                                                                                                                                                                                                                                                                                                                                                                                                                                                                                                                                                                                                                                                                                                                                                                                                                                                                                                                                                                                                                                                                                                                                                                                                                                                                                                                                                                                                                                                                                                                            | -1.220592                                                                         | 0.711093                                                                           | 2.625914  |          |           |          |   |          |           |          |   |          |           |          |   |           |           |          |   |          |           |          |   |          |          |          |   |          |           |           |   |          |          |           |   |          |          |          |   |          |           |           |   |           |           |           |   |          |          |           |   |          |           |           |   |           |          |          |   |           |          |          |   |          |          |          |   |           |          |          |   |           |          |          |   |           |          |          |   |          |          |          |   |          |          |          |   |          |          |          |   |          |          |          |   |          |          |          |   |          |          |          |   |          |          |           |   |          |          |           |   |          |          |           |   |          |          |           |   |          |          |          |   |          |          |           |   |          |          |           |   |          |          |          |   |           |          |          |   |           |          |          |   |           |          |          |
| O                                                                                                                                                                                                                                                                                                                                                                                                                                                                                                                                                                                                                                                                                                                                                                                                                                                                                                                                                                                                                                                                                                                                                                                                                                                                                                                                                                                                                                                                                                                                                                                                                                                                                                                                                                                                                                                                                                                                                                                                                                                                                                                                                                                                                                                                                                                                                                                                                                                                                                                                                                                                                                                                                                                                                                                                                                                                                                                                                                                                                                                                                                                                                                                                                                                                                                                                                                                                                                                                                                                                                                                                                                                                                                                                                                                                                                                                                                                                                                                                                                                                                                                                                                                                                                                                                                                                                                                                                                                                                                                                                                                                                                                                                                                                                                                                                                                                                                                                                                                                                                                                                                                                                                                                                                                                                                                                                                                                                                                                                                                                                                                                                                                                                                                                                                                                                                                                                                                                                                                                                                                                                                                                                                                                                                                                                                                                                                                                                                                                                                                                                                                                                                                                                                                                                                                                                                                                                                                                                                            | 1.080025                                                                          | 1.736381                                                                           | 2.601830  |          |           |          |   |          |           |          |   |          |           |          |   |           |           |          |   |          |           |          |   |          |          |          |   |          |           |           |   |          |          |           |   |          |          |          |   |          |           |           |   |           |           |           |   |          |          |           |   |          |           |           |   |           |          |          |   |           |          |          |   |          |          |          |   |           |          |          |   |           |          |          |   |           |          |          |   |          |          |          |   |          |          |          |   |          |          |          |   |          |          |          |   |          |          |          |   |          |          |          |   |          |          |           |   |          |          |           |   |          |          |           |   |          |          |           |   |          |          |          |   |          |          |           |   |          |          |           |   |          |          |          |   |           |          |          |   |           |          |          |   |           |          |          |
| N                                                                                                                                                                                                                                                                                                                                                                                                                                                                                                                                                                                                                                                                                                                                                                                                                                                                                                                                                                                                                                                                                                                                                                                                                                                                                                                                                                                                                                                                                                                                                                                                                                                                                                                                                                                                                                                                                                                                                                                                                                                                                                                                                                                                                                                                                                                                                                                                                                                                                                                                                                                                                                                                                                                                                                                                                                                                                                                                                                                                                                                                                                                                                                                                                                                                                                                                                                                                                                                                                                                                                                                                                                                                                                                                                                                                                                                                                                                                                                                                                                                                                                                                                                                                                                                                                                                                                                                                                                                                                                                                                                                                                                                                                                                                                                                                                                                                                                                                                                                                                                                                                                                                                                                                                                                                                                                                                                                                                                                                                                                                                                                                                                                                                                                                                                                                                                                                                                                                                                                                                                                                                                                                                                                                                                                                                                                                                                                                                                                                                                                                                                                                                                                                                                                                                                                                                                                                                                                                                                            | -1.027794                                                                         | 3.058722                                                                           | 1.747709  |          |           |          |   |          |           |          |   |          |           |          |   |           |           |          |   |          |           |          |   |          |          |          |   |          |           |           |   |          |          |           |   |          |          |          |   |          |           |           |   |           |           |           |   |          |          |           |   |          |           |           |   |           |          |          |   |           |          |          |   |          |          |          |   |           |          |          |   |           |          |          |   |           |          |          |   |          |          |          |   |          |          |          |   |          |          |          |   |          |          |          |   |          |          |          |   |          |          |          |   |          |          |           |   |          |          |           |   |          |          |           |   |          |          |           |   |          |          |          |   |          |          |           |   |          |          |           |   |          |          |          |   |           |          |          |   |           |          |          |   |           |          |          |
| C                                                                                                                                                                                                                                                                                                                                                                                                                                                                                                                                                                                                                                                                                                                                                                                                                                                                                                                                                                                                                                                                                                                                                                                                                                                                                                                                                                                                                                                                                                                                                                                                                                                                                                                                                                                                                                                                                                                                                                                                                                                                                                                                                                                                                                                                                                                                                                                                                                                                                                                                                                                                                                                                                                                                                                                                                                                                                                                                                                                                                                                                                                                                                                                                                                                                                                                                                                                                                                                                                                                                                                                                                                                                                                                                                                                                                                                                                                                                                                                                                                                                                                                                                                                                                                                                                                                                                                                                                                                                                                                                                                                                                                                                                                                                                                                                                                                                                                                                                                                                                                                                                                                                                                                                                                                                                                                                                                                                                                                                                                                                                                                                                                                                                                                                                                                                                                                                                                                                                                                                                                                                                                                                                                                                                                                                                                                                                                                                                                                                                                                                                                                                                                                                                                                                                                                                                                                                                                                                                                            | -0.424760                                                                         | 4.216983                                                                           | 1.224332  |          |           |          |   |          |           |          |   |          |           |          |   |           |           |          |   |          |           |          |   |          |          |          |   |          |           |           |   |          |          |           |   |          |          |          |   |          |           |           |   |           |           |           |   |          |          |           |   |          |           |           |   |           |          |          |   |           |          |          |   |          |          |          |   |           |          |          |   |           |          |          |   |           |          |          |   |          |          |          |   |          |          |          |   |          |          |          |   |          |          |          |   |          |          |          |   |          |          |          |   |          |          |           |   |          |          |           |   |          |          |           |   |          |          |           |   |          |          |          |   |          |          |           |   |          |          |           |   |          |          |          |   |           |          |          |   |           |          |          |   |           |          |          |
| O                                                                                                                                                                                                                                                                                                                                                                                                                                                                                                                                                                                                                                                                                                                                                                                                                                                                                                                                                                                                                                                                                                                                                                                                                                                                                                                                                                                                                                                                                                                                                                                                                                                                                                                                                                                                                                                                                                                                                                                                                                                                                                                                                                                                                                                                                                                                                                                                                                                                                                                                                                                                                                                                                                                                                                                                                                                                                                                                                                                                                                                                                                                                                                                                                                                                                                                                                                                                                                                                                                                                                                                                                                                                                                                                                                                                                                                                                                                                                                                                                                                                                                                                                                                                                                                                                                                                                                                                                                                                                                                                                                                                                                                                                                                                                                                                                                                                                                                                                                                                                                                                                                                                                                                                                                                                                                                                                                                                                                                                                                                                                                                                                                                                                                                                                                                                                                                                                                                                                                                                                                                                                                                                                                                                                                                                                                                                                                                                                                                                                                                                                                                                                                                                                                                                                                                                                                                                                                                                                                            | -1.061632                                                                         | 5.250189                                                                           | 1.093223  |          |           |          |   |          |           |          |   |          |           |          |   |           |           |          |   |          |           |          |   |          |          |          |   |          |           |           |   |          |          |           |   |          |          |          |   |          |           |           |   |           |           |           |   |          |          |           |   |          |           |           |   |           |          |          |   |           |          |          |   |          |          |          |   |           |          |          |   |           |          |          |   |           |          |          |   |          |          |          |   |          |          |          |   |          |          |          |   |          |          |          |   |          |          |          |   |          |          |          |   |          |          |           |   |          |          |           |   |          |          |           |   |          |          |           |   |          |          |          |   |          |          |           |   |          |          |           |   |          |          |          |   |           |          |          |   |           |          |          |   |           |          |          |
| O                                                                                                                                                                                                                                                                                                                                                                                                                                                                                                                                                                                                                                                                                                                                                                                                                                                                                                                                                                                                                                                                                                                                                                                                                                                                                                                                                                                                                                                                                                                                                                                                                                                                                                                                                                                                                                                                                                                                                                                                                                                                                                                                                                                                                                                                                                                                                                                                                                                                                                                                                                                                                                                                                                                                                                                                                                                                                                                                                                                                                                                                                                                                                                                                                                                                                                                                                                                                                                                                                                                                                                                                                                                                                                                                                                                                                                                                                                                                                                                                                                                                                                                                                                                                                                                                                                                                                                                                                                                                                                                                                                                                                                                                                                                                                                                                                                                                                                                                                                                                                                                                                                                                                                                                                                                                                                                                                                                                                                                                                                                                                                                                                                                                                                                                                                                                                                                                                                                                                                                                                                                                                                                                                                                                                                                                                                                                                                                                                                                                                                                                                                                                                                                                                                                                                                                                                                                                                                                                                                            | 0.856057                                                                          | 4.029988                                                                           | 0.918823  |          |           |          |   |          |           |          |   |          |           |          |   |           |           |          |   |          |           |          |   |          |          |          |   |          |           |           |   |          |          |           |   |          |          |          |   |          |           |           |   |           |           |           |   |          |          |           |   |          |           |           |   |           |          |          |   |           |          |          |   |          |          |          |   |           |          |          |   |           |          |          |   |           |          |          |   |          |          |          |   |          |          |          |   |          |          |          |   |          |          |          |   |          |          |          |   |          |          |          |   |          |          |           |   |          |          |           |   |          |          |           |   |          |          |           |   |          |          |          |   |          |          |           |   |          |          |           |   |          |          |          |   |           |          |          |   |           |          |          |   |           |          |          |
| C                                                                                                                                                                                                                                                                                                                                                                                                                                                                                                                                                                                                                                                                                                                                                                                                                                                                                                                                                                                                                                                                                                                                                                                                                                                                                                                                                                                                                                                                                                                                                                                                                                                                                                                                                                                                                                                                                                                                                                                                                                                                                                                                                                                                                                                                                                                                                                                                                                                                                                                                                                                                                                                                                                                                                                                                                                                                                                                                                                                                                                                                                                                                                                                                                                                                                                                                                                                                                                                                                                                                                                                                                                                                                                                                                                                                                                                                                                                                                                                                                                                                                                                                                                                                                                                                                                                                                                                                                                                                                                                                                                                                                                                                                                                                                                                                                                                                                                                                                                                                                                                                                                                                                                                                                                                                                                                                                                                                                                                                                                                                                                                                                                                                                                                                                                                                                                                                                                                                                                                                                                                                                                                                                                                                                                                                                                                                                                                                                                                                                                                                                                                                                                                                                                                                                                                                                                                                                                                                                                            | 1.713766                                                                          | 5.152736                                                                           | 0.447532  |          |           |          |   |          |           |          |   |          |           |          |   |           |           |          |   |          |           |          |   |          |          |          |   |          |           |           |   |          |          |           |   |          |          |          |   |          |           |           |   |           |           |           |   |          |          |           |   |          |           |           |   |           |          |          |   |           |          |          |   |          |          |          |   |           |          |          |   |           |          |          |   |           |          |          |   |          |          |          |   |          |          |          |   |          |          |          |   |          |          |          |   |          |          |          |   |          |          |          |   |          |          |           |   |          |          |           |   |          |          |           |   |          |          |           |   |          |          |          |   |          |          |           |   |          |          |           |   |          |          |          |   |           |          |          |   |           |          |          |   |           |          |          |
| C                                                                                                                                                                                                                                                                                                                                                                                                                                                                                                                                                                                                                                                                                                                                                                                                                                                                                                                                                                                                                                                                                                                                                                                                                                                                                                                                                                                                                                                                                                                                                                                                                                                                                                                                                                                                                                                                                                                                                                                                                                                                                                                                                                                                                                                                                                                                                                                                                                                                                                                                                                                                                                                                                                                                                                                                                                                                                                                                                                                                                                                                                                                                                                                                                                                                                                                                                                                                                                                                                                                                                                                                                                                                                                                                                                                                                                                                                                                                                                                                                                                                                                                                                                                                                                                                                                                                                                                                                                                                                                                                                                                                                                                                                                                                                                                                                                                                                                                                                                                                                                                                                                                                                                                                                                                                                                                                                                                                                                                                                                                                                                                                                                                                                                                                                                                                                                                                                                                                                                                                                                                                                                                                                                                                                                                                                                                                                                                                                                                                                                                                                                                                                                                                                                                                                                                                                                                                                                                                                                            | 1.775332                                                                          | 6.240548                                                                           | 1.523202  |          |           |          |   |          |           |          |   |          |           |          |   |           |           |          |   |          |           |          |   |          |          |          |   |          |           |           |   |          |          |           |   |          |          |          |   |          |           |           |   |           |           |           |   |          |          |           |   |          |           |           |   |           |          |          |   |           |          |          |   |          |          |          |   |           |          |          |   |           |          |          |   |           |          |          |   |          |          |          |   |          |          |          |   |          |          |          |   |          |          |          |   |          |          |          |   |          |          |          |   |          |          |           |   |          |          |           |   |          |          |           |   |          |          |           |   |          |          |          |   |          |          |           |   |          |          |           |   |          |          |          |   |           |          |          |   |           |          |          |   |           |          |          |
| H                                                                                                                                                                                                                                                                                                                                                                                                                                                                                                                                                                                                                                                                                                                                                                                                                                                                                                                                                                                                                                                                                                                                                                                                                                                                                                                                                                                                                                                                                                                                                                                                                                                                                                                                                                                                                                                                                                                                                                                                                                                                                                                                                                                                                                                                                                                                                                                                                                                                                                                                                                                                                                                                                                                                                                                                                                                                                                                                                                                                                                                                                                                                                                                                                                                                                                                                                                                                                                                                                                                                                                                                                                                                                                                                                                                                                                                                                                                                                                                                                                                                                                                                                                                                                                                                                                                                                                                                                                                                                                                                                                                                                                                                                                                                                                                                                                                                                                                                                                                                                                                                                                                                                                                                                                                                                                                                                                                                                                                                                                                                                                                                                                                                                                                                                                                                                                                                                                                                                                                                                                                                                                                                                                                                                                                                                                                                                                                                                                                                                                                                                                                                                                                                                                                                                                                                                                                                                                                                                                            | 2.511928                                                                          | 6.994174                                                                           | 1.226192  |          |           |          |   |          |           |          |   |          |           |          |   |           |           |          |   |          |           |          |   |          |          |          |   |          |           |           |   |          |          |           |   |          |          |          |   |          |           |           |   |           |           |           |   |          |          |           |   |          |           |           |   |           |          |          |   |           |          |          |   |          |          |          |   |           |          |          |   |           |          |          |   |           |          |          |   |          |          |          |   |          |          |          |   |          |          |          |   |          |          |          |   |          |          |          |   |          |          |          |   |          |          |           |   |          |          |           |   |          |          |           |   |          |          |           |   |          |          |          |   |          |          |           |   |          |          |           |   |          |          |          |   |           |          |          |   |           |          |          |   |           |          |          |
| H                                                                                                                                                                                                                                                                                                                                                                                                                                                                                                                                                                                                                                                                                                                                                                                                                                                                                                                                                                                                                                                                                                                                                                                                                                                                                                                                                                                                                                                                                                                                                                                                                                                                                                                                                                                                                                                                                                                                                                                                                                                                                                                                                                                                                                                                                                                                                                                                                                                                                                                                                                                                                                                                                                                                                                                                                                                                                                                                                                                                                                                                                                                                                                                                                                                                                                                                                                                                                                                                                                                                                                                                                                                                                                                                                                                                                                                                                                                                                                                                                                                                                                                                                                                                                                                                                                                                                                                                                                                                                                                                                                                                                                                                                                                                                                                                                                                                                                                                                                                                                                                                                                                                                                                                                                                                                                                                                                                                                                                                                                                                                                                                                                                                                                                                                                                                                                                                                                                                                                                                                                                                                                                                                                                                                                                                                                                                                                                                                                                                                                                                                                                                                                                                                                                                                                                                                                                                                                                                                                            | 0.810317                                                                          | 6.731747                                                                           | 1.654276  |          |           |          |   |          |           |          |   |          |           |          |   |           |           |          |   |          |           |          |   |          |          |          |   |          |           |           |   |          |          |           |   |          |          |          |   |          |           |           |   |           |           |           |   |          |          |           |   |          |           |           |   |           |          |          |   |           |          |          |   |          |          |          |   |           |          |          |   |           |          |          |   |           |          |          |   |          |          |          |   |          |          |          |   |          |          |          |   |          |          |          |   |          |          |          |   |          |          |          |   |          |          |           |   |          |          |           |   |          |          |           |   |          |          |           |   |          |          |          |   |          |          |           |   |          |          |           |   |          |          |          |   |           |          |          |   |           |          |          |   |           |          |          |
| H                                                                                                                                                                                                                                                                                                                                                                                                                                                                                                                                                                                                                                                                                                                                                                                                                                                                                                                                                                                                                                                                                                                                                                                                                                                                                                                                                                                                                                                                                                                                                                                                                                                                                                                                                                                                                                                                                                                                                                                                                                                                                                                                                                                                                                                                                                                                                                                                                                                                                                                                                                                                                                                                                                                                                                                                                                                                                                                                                                                                                                                                                                                                                                                                                                                                                                                                                                                                                                                                                                                                                                                                                                                                                                                                                                                                                                                                                                                                                                                                                                                                                                                                                                                                                                                                                                                                                                                                                                                                                                                                                                                                                                                                                                                                                                                                                                                                                                                                                                                                                                                                                                                                                                                                                                                                                                                                                                                                                                                                                                                                                                                                                                                                                                                                                                                                                                                                                                                                                                                                                                                                                                                                                                                                                                                                                                                                                                                                                                                                                                                                                                                                                                                                                                                                                                                                                                                                                                                                                                            | 2.093120                                                                          | 5.813407                                                                           | 2.479457  |          |           |          |   |          |           |          |   |          |           |          |   |           |           |          |   |          |           |          |   |          |          |          |   |          |           |           |   |          |          |           |   |          |          |          |   |          |           |           |   |           |           |           |   |          |          |           |   |          |           |           |   |           |          |          |   |           |          |          |   |          |          |          |   |           |          |          |   |           |          |          |   |           |          |          |   |          |          |          |   |          |          |          |   |          |          |          |   |          |          |          |   |          |          |          |   |          |          |          |   |          |          |           |   |          |          |           |   |          |          |           |   |          |          |           |   |          |          |          |   |          |          |           |   |          |          |           |   |          |          |          |   |           |          |          |   |           |          |          |   |           |          |          |
| C                                                                                                                                                                                                                                                                                                                                                                                                                                                                                                                                                                                                                                                                                                                                                                                                                                                                                                                                                                                                                                                                                                                                                                                                                                                                                                                                                                                                                                                                                                                                                                                                                                                                                                                                                                                                                                                                                                                                                                                                                                                                                                                                                                                                                                                                                                                                                                                                                                                                                                                                                                                                                                                                                                                                                                                                                                                                                                                                                                                                                                                                                                                                                                                                                                                                                                                                                                                                                                                                                                                                                                                                                                                                                                                                                                                                                                                                                                                                                                                                                                                                                                                                                                                                                                                                                                                                                                                                                                                                                                                                                                                                                                                                                                                                                                                                                                                                                                                                                                                                                                                                                                                                                                                                                                                                                                                                                                                                                                                                                                                                                                                                                                                                                                                                                                                                                                                                                                                                                                                                                                                                                                                                                                                                                                                                                                                                                                                                                                                                                                                                                                                                                                                                                                                                                                                                                                                                                                                                                                            | 1.194965                                                                          | 5.674405                                                                           | -0.894987 |          |           |          |   |          |           |          |   |          |           |          |   |           |           |          |   |          |           |          |   |          |          |          |   |          |           |           |   |          |          |           |   |          |          |          |   |          |           |           |   |           |           |           |   |          |          |           |   |          |           |           |   |           |          |          |   |           |          |          |   |          |          |          |   |           |          |          |   |           |          |          |   |           |          |          |   |          |          |          |   |          |          |          |   |          |          |          |   |          |          |          |   |          |          |          |   |          |          |          |   |          |          |           |   |          |          |           |   |          |          |           |   |          |          |           |   |          |          |          |   |          |          |           |   |          |          |           |   |          |          |          |   |           |          |          |   |           |          |          |   |           |          |          |
| H                                                                                                                                                                                                                                                                                                                                                                                                                                                                                                                                                                                                                                                                                                                                                                                                                                                                                                                                                                                                                                                                                                                                                                                                                                                                                                                                                                                                                                                                                                                                                                                                                                                                                                                                                                                                                                                                                                                                                                                                                                                                                                                                                                                                                                                                                                                                                                                                                                                                                                                                                                                                                                                                                                                                                                                                                                                                                                                                                                                                                                                                                                                                                                                                                                                                                                                                                                                                                                                                                                                                                                                                                                                                                                                                                                                                                                                                                                                                                                                                                                                                                                                                                                                                                                                                                                                                                                                                                                                                                                                                                                                                                                                                                                                                                                                                                                                                                                                                                                                                                                                                                                                                                                                                                                                                                                                                                                                                                                                                                                                                                                                                                                                                                                                                                                                                                                                                                                                                                                                                                                                                                                                                                                                                                                                                                                                                                                                                                                                                                                                                                                                                                                                                                                                                                                                                                                                                                                                                                                            | 0.227382                                                                          | 6.166154                                                                           | -0.787497 |          |           |          |   |          |           |          |   |          |           |          |   |           |           |          |   |          |           |          |   |          |          |          |   |          |           |           |   |          |          |           |   |          |          |          |   |          |           |           |   |           |           |           |   |          |          |           |   |          |           |           |   |           |          |          |   |           |          |          |   |          |          |          |   |           |          |          |   |           |          |          |   |           |          |          |   |          |          |          |   |          |          |          |   |          |          |          |   |          |          |          |   |          |          |          |   |          |          |          |   |          |          |           |   |          |          |           |   |          |          |           |   |          |          |           |   |          |          |          |   |          |          |           |   |          |          |           |   |          |          |          |   |           |          |          |   |           |          |          |   |           |          |          |
| H                                                                                                                                                                                                                                                                                                                                                                                                                                                                                                                                                                                                                                                                                                                                                                                                                                                                                                                                                                                                                                                                                                                                                                                                                                                                                                                                                                                                                                                                                                                                                                                                                                                                                                                                                                                                                                                                                                                                                                                                                                                                                                                                                                                                                                                                                                                                                                                                                                                                                                                                                                                                                                                                                                                                                                                                                                                                                                                                                                                                                                                                                                                                                                                                                                                                                                                                                                                                                                                                                                                                                                                                                                                                                                                                                                                                                                                                                                                                                                                                                                                                                                                                                                                                                                                                                                                                                                                                                                                                                                                                                                                                                                                                                                                                                                                                                                                                                                                                                                                                                                                                                                                                                                                                                                                                                                                                                                                                                                                                                                                                                                                                                                                                                                                                                                                                                                                                                                                                                                                                                                                                                                                                                                                                                                                                                                                                                                                                                                                                                                                                                                                                                                                                                                                                                                                                                                                                                                                                                                            | 1.911749                                                                          | 6.397019                                                                           | -1.298819 |          |           |          |   |          |           |          |   |          |           |          |   |           |           |          |   |          |           |          |   |          |          |          |   |          |           |           |   |          |          |           |   |          |          |          |   |          |           |           |   |           |           |           |   |          |          |           |   |          |           |           |   |           |          |          |   |           |          |          |   |          |          |          |   |           |          |          |   |           |          |          |   |           |          |          |   |          |          |          |   |          |          |          |   |          |          |          |   |          |          |          |   |          |          |          |   |          |          |          |   |          |          |           |   |          |          |           |   |          |          |           |   |          |          |           |   |          |          |          |   |          |          |           |   |          |          |           |   |          |          |          |   |           |          |          |   |           |          |          |   |           |          |          |
| H                                                                                                                                                                                                                                                                                                                                                                                                                                                                                                                                                                                                                                                                                                                                                                                                                                                                                                                                                                                                                                                                                                                                                                                                                                                                                                                                                                                                                                                                                                                                                                                                                                                                                                                                                                                                                                                                                                                                                                                                                                                                                                                                                                                                                                                                                                                                                                                                                                                                                                                                                                                                                                                                                                                                                                                                                                                                                                                                                                                                                                                                                                                                                                                                                                                                                                                                                                                                                                                                                                                                                                                                                                                                                                                                                                                                                                                                                                                                                                                                                                                                                                                                                                                                                                                                                                                                                                                                                                                                                                                                                                                                                                                                                                                                                                                                                                                                                                                                                                                                                                                                                                                                                                                                                                                                                                                                                                                                                                                                                                                                                                                                                                                                                                                                                                                                                                                                                                                                                                                                                                                                                                                                                                                                                                                                                                                                                                                                                                                                                                                                                                                                                                                                                                                                                                                                                                                                                                                                                                            | 1.101013                                                                          | 4.853144                                                                           | -1.612639 |          |           |          |   |          |           |          |   |          |           |          |   |           |           |          |   |          |           |          |   |          |          |          |   |          |           |           |   |          |          |           |   |          |          |          |   |          |           |           |   |           |           |           |   |          |          |           |   |          |           |           |   |           |          |          |   |           |          |          |   |          |          |          |   |           |          |          |   |           |          |          |   |           |          |          |   |          |          |          |   |          |          |          |   |          |          |          |   |          |          |          |   |          |          |          |   |          |          |          |   |          |          |           |   |          |          |           |   |          |          |           |   |          |          |           |   |          |          |          |   |          |          |           |   |          |          |           |   |          |          |          |   |           |          |          |   |           |          |          |   |           |          |          |
| C                                                                                                                                                                                                                                                                                                                                                                                                                                                                                                                                                                                                                                                                                                                                                                                                                                                                                                                                                                                                                                                                                                                                                                                                                                                                                                                                                                                                                                                                                                                                                                                                                                                                                                                                                                                                                                                                                                                                                                                                                                                                                                                                                                                                                                                                                                                                                                                                                                                                                                                                                                                                                                                                                                                                                                                                                                                                                                                                                                                                                                                                                                                                                                                                                                                                                                                                                                                                                                                                                                                                                                                                                                                                                                                                                                                                                                                                                                                                                                                                                                                                                                                                                                                                                                                                                                                                                                                                                                                                                                                                                                                                                                                                                                                                                                                                                                                                                                                                                                                                                                                                                                                                                                                                                                                                                                                                                                                                                                                                                                                                                                                                                                                                                                                                                                                                                                                                                                                                                                                                                                                                                                                                                                                                                                                                                                                                                                                                                                                                                                                                                                                                                                                                                                                                                                                                                                                                                                                                                                            | 3.075694                                                                          | 4.476992                                                                           | 0.282440  |          |           |          |   |          |           |          |   |          |           |          |   |           |           |          |   |          |           |          |   |          |          |          |   |          |           |           |   |          |          |           |   |          |          |          |   |          |           |           |   |           |           |           |   |          |          |           |   |          |           |           |   |           |          |          |   |           |          |          |   |          |          |          |   |           |          |          |   |           |          |          |   |           |          |          |   |          |          |          |   |          |          |          |   |          |          |          |   |          |          |          |   |          |          |          |   |          |          |          |   |          |          |           |   |          |          |           |   |          |          |           |   |          |          |           |   |          |          |          |   |          |          |           |   |          |          |           |   |          |          |          |   |           |          |          |   |           |          |          |   |           |          |          |
| H                                                                                                                                                                                                                                                                                                                                                                                                                                                                                                                                                                                                                                                                                                                                                                                                                                                                                                                                                                                                                                                                                                                                                                                                                                                                                                                                                                                                                                                                                                                                                                                                                                                                                                                                                                                                                                                                                                                                                                                                                                                                                                                                                                                                                                                                                                                                                                                                                                                                                                                                                                                                                                                                                                                                                                                                                                                                                                                                                                                                                                                                                                                                                                                                                                                                                                                                                                                                                                                                                                                                                                                                                                                                                                                                                                                                                                                                                                                                                                                                                                                                                                                                                                                                                                                                                                                                                                                                                                                                                                                                                                                                                                                                                                                                                                                                                                                                                                                                                                                                                                                                                                                                                                                                                                                                                                                                                                                                                                                                                                                                                                                                                                                                                                                                                                                                                                                                                                                                                                                                                                                                                                                                                                                                                                                                                                                                                                                                                                                                                                                                                                                                                                                                                                                                                                                                                                                                                                                                                                            | 3.028437                                                                          | 3.686566                                                                           | -0.471426 |          |           |          |   |          |           |          |   |          |           |          |   |           |           |          |   |          |           |          |   |          |          |          |   |          |           |           |   |          |          |           |   |          |          |          |   |          |           |           |   |           |           |           |   |          |          |           |   |          |           |           |   |           |          |          |   |           |          |          |   |          |          |          |   |           |          |          |   |           |          |          |   |           |          |          |   |          |          |          |   |          |          |          |   |          |          |          |   |          |          |          |   |          |          |          |   |          |          |          |   |          |          |           |   |          |          |           |   |          |          |           |   |          |          |           |   |          |          |          |   |          |          |           |   |          |          |           |   |          |          |          |   |           |          |          |   |           |          |          |   |           |          |          |
| H                                                                                                                                                                                                                                                                                                                                                                                                                                                                                                                                                                                                                                                                                                                                                                                                                                                                                                                                                                                                                                                                                                                                                                                                                                                                                                                                                                                                                                                                                                                                                                                                                                                                                                                                                                                                                                                                                                                                                                                                                                                                                                                                                                                                                                                                                                                                                                                                                                                                                                                                                                                                                                                                                                                                                                                                                                                                                                                                                                                                                                                                                                                                                                                                                                                                                                                                                                                                                                                                                                                                                                                                                                                                                                                                                                                                                                                                                                                                                                                                                                                                                                                                                                                                                                                                                                                                                                                                                                                                                                                                                                                                                                                                                                                                                                                                                                                                                                                                                                                                                                                                                                                                                                                                                                                                                                                                                                                                                                                                                                                                                                                                                                                                                                                                                                                                                                                                                                                                                                                                                                                                                                                                                                                                                                                                                                                                                                                                                                                                                                                                                                                                                                                                                                                                                                                                                                                                                                                                                                            | 3.815258                                                                          | 5.217158                                                                           | -0.037515 |          |           |          |   |          |           |          |   |          |           |          |   |           |           |          |   |          |           |          |   |          |          |          |   |          |           |           |   |          |          |           |   |          |          |          |   |          |           |           |   |           |           |           |   |          |          |           |   |          |           |           |   |           |          |          |   |           |          |          |   |          |          |          |   |           |          |          |   |           |          |          |   |           |          |          |   |          |          |          |   |          |          |          |   |          |          |          |   |          |          |          |   |          |          |          |   |          |          |          |   |          |          |           |   |          |          |           |   |          |          |           |   |          |          |           |   |          |          |          |   |          |          |           |   |          |          |           |   |          |          |          |   |           |          |          |   |           |          |          |   |           |          |          |
| H                                                                                                                                                                                                                                                                                                                                                                                                                                                                                                                                                                                                                                                                                                                                                                                                                                                                                                                                                                                                                                                                                                                                                                                                                                                                                                                                                                                                                                                                                                                                                                                                                                                                                                                                                                                                                                                                                                                                                                                                                                                                                                                                                                                                                                                                                                                                                                                                                                                                                                                                                                                                                                                                                                                                                                                                                                                                                                                                                                                                                                                                                                                                                                                                                                                                                                                                                                                                                                                                                                                                                                                                                                                                                                                                                                                                                                                                                                                                                                                                                                                                                                                                                                                                                                                                                                                                                                                                                                                                                                                                                                                                                                                                                                                                                                                                                                                                                                                                                                                                                                                                                                                                                                                                                                                                                                                                                                                                                                                                                                                                                                                                                                                                                                                                                                                                                                                                                                                                                                                                                                                                                                                                                                                                                                                                                                                                                                                                                                                                                                                                                                                                                                                                                                                                                                                                                                                                                                                                                                            | 3.405940                                                                          | 4.036588                                                                           | 1.227136  |          |           |          |   |          |           |          |   |          |           |          |   |           |           |          |   |          |           |          |   |          |          |          |   |          |           |           |   |          |          |           |   |          |          |          |   |          |           |           |   |           |           |           |   |          |          |           |   |          |           |           |   |           |          |          |   |           |          |          |   |          |          |          |   |           |          |          |   |           |          |          |   |           |          |          |   |          |          |          |   |          |          |          |   |          |          |          |   |          |          |          |   |          |          |          |   |          |          |          |   |          |          |           |   |          |          |           |   |          |          |           |   |          |          |           |   |          |          |          |   |          |          |           |   |          |          |           |   |          |          |          |   |           |          |          |   |           |          |          |   |           |          |          |
| C                                                                                                                                                                                                                                                                                                                                                                                                                                                                                                                                                                                                                                                                                                                                                                                                                                                                                                                                                                                                                                                                                                                                                                                                                                                                                                                                                                                                                                                                                                                                                                                                                                                                                                                                                                                                                                                                                                                                                                                                                                                                                                                                                                                                                                                                                                                                                                                                                                                                                                                                                                                                                                                                                                                                                                                                                                                                                                                                                                                                                                                                                                                                                                                                                                                                                                                                                                                                                                                                                                                                                                                                                                                                                                                                                                                                                                                                                                                                                                                                                                                                                                                                                                                                                                                                                                                                                                                                                                                                                                                                                                                                                                                                                                                                                                                                                                                                                                                                                                                                                                                                                                                                                                                                                                                                                                                                                                                                                                                                                                                                                                                                                                                                                                                                                                                                                                                                                                                                                                                                                                                                                                                                                                                                                                                                                                                                                                                                                                                                                                                                                                                                                                                                                                                                                                                                                                                                                                                                                                            | -2.460496                                                                         | 3.157112                                                                           | 2.134222  |          |           |          |   |          |           |          |   |          |           |          |   |           |           |          |   |          |           |          |   |          |          |          |   |          |           |           |   |          |          |           |   |          |          |          |   |          |           |           |   |           |           |           |   |          |          |           |   |          |           |           |   |           |          |          |   |           |          |          |   |          |          |          |   |           |          |          |   |           |          |          |   |           |          |          |   |          |          |          |   |          |          |          |   |          |          |          |   |          |          |          |   |          |          |          |   |          |          |          |   |          |          |           |   |          |          |           |   |          |          |           |   |          |          |           |   |          |          |          |   |          |          |           |   |          |          |           |   |          |          |          |   |           |          |          |   |           |          |          |   |           |          |          |
| H                                                                                                                                                                                                                                                                                                                                                                                                                                                                                                                                                                                                                                                                                                                                                                                                                                                                                                                                                                                                                                                                                                                                                                                                                                                                                                                                                                                                                                                                                                                                                                                                                                                                                                                                                                                                                                                                                                                                                                                                                                                                                                                                                                                                                                                                                                                                                                                                                                                                                                                                                                                                                                                                                                                                                                                                                                                                                                                                                                                                                                                                                                                                                                                                                                                                                                                                                                                                                                                                                                                                                                                                                                                                                                                                                                                                                                                                                                                                                                                                                                                                                                                                                                                                                                                                                                                                                                                                                                                                                                                                                                                                                                                                                                                                                                                                                                                                                                                                                                                                                                                                                                                                                                                                                                                                                                                                                                                                                                                                                                                                                                                                                                                                                                                                                                                                                                                                                                                                                                                                                                                                                                                                                                                                                                                                                                                                                                                                                                                                                                                                                                                                                                                                                                                                                                                                                                                                                                                                                                            | -2.623702                                                                         | 2.477303                                                                           | 2.969723  |          |           |          |   |          |           |          |   |          |           |          |   |           |           |          |   |          |           |          |   |          |          |          |   |          |           |           |   |          |          |           |   |          |          |          |   |          |           |           |   |           |           |           |   |          |          |           |   |          |           |           |   |           |          |          |   |           |          |          |   |          |          |          |   |           |          |          |   |           |          |          |   |           |          |          |   |          |          |          |   |          |          |          |   |          |          |          |   |          |          |          |   |          |          |          |   |          |          |          |   |          |          |           |   |          |          |           |   |          |          |           |   |          |          |           |   |          |          |          |   |          |          |           |   |          |          |           |   |          |          |          |   |           |          |          |   |           |          |          |   |           |          |          |
| H                                                                                                                                                                                                                                                                                                                                                                                                                                                                                                                                                                                                                                                                                                                                                                                                                                                                                                                                                                                                                                                                                                                                                                                                                                                                                                                                                                                                                                                                                                                                                                                                                                                                                                                                                                                                                                                                                                                                                                                                                                                                                                                                                                                                                                                                                                                                                                                                                                                                                                                                                                                                                                                                                                                                                                                                                                                                                                                                                                                                                                                                                                                                                                                                                                                                                                                                                                                                                                                                                                                                                                                                                                                                                                                                                                                                                                                                                                                                                                                                                                                                                                                                                                                                                                                                                                                                                                                                                                                                                                                                                                                                                                                                                                                                                                                                                                                                                                                                                                                                                                                                                                                                                                                                                                                                                                                                                                                                                                                                                                                                                                                                                                                                                                                                                                                                                                                                                                                                                                                                                                                                                                                                                                                                                                                                                                                                                                                                                                                                                                                                                                                                                                                                                                                                                                                                                                                                                                                                                                            | -2.603928                                                                         | 4.179460                                                                           | 2.486957  |          |           |          |   |          |           |          |   |          |           |          |   |           |           |          |   |          |           |          |   |          |          |          |   |          |           |           |   |          |          |           |   |          |          |          |   |          |           |           |   |           |           |           |   |          |          |           |   |          |           |           |   |           |          |          |   |           |          |          |   |          |          |          |   |           |          |          |   |           |          |          |   |           |          |          |   |          |          |          |   |          |          |          |   |          |          |          |   |          |          |          |   |          |          |          |   |          |          |          |   |          |          |           |   |          |          |           |   |          |          |           |   |          |          |           |   |          |          |          |   |          |          |           |   |          |          |           |   |          |          |          |   |           |          |          |   |           |          |          |   |           |          |          |

|                                                                                                                                                                                                                                                                                                                                                                                                                                                                                                                                                                                                                                                                                                                                                                                                                                                                                                                                                                                                                                                                                                                                                                                                                                                                                                                                                                                                                                                                                                                                                                                                                                        |                         | C         | -3.420710 | 2.849462 | 0.982368  |      |                         |  |  |   |   |   |   |           |          |           |   |           |          |           |   |          |          |           |   |          |           |          |   |          |          |          |   |          |          |           |   |          |          |           |   |          |          |           |   |          |          |           |   |          |          |           |   |          |          |           |   |          |          |           |   |          |          |           |   |          |          |           |   |          |          |           |   |          |          |           |   |          |          |           |   |          |          |           |
|----------------------------------------------------------------------------------------------------------------------------------------------------------------------------------------------------------------------------------------------------------------------------------------------------------------------------------------------------------------------------------------------------------------------------------------------------------------------------------------------------------------------------------------------------------------------------------------------------------------------------------------------------------------------------------------------------------------------------------------------------------------------------------------------------------------------------------------------------------------------------------------------------------------------------------------------------------------------------------------------------------------------------------------------------------------------------------------------------------------------------------------------------------------------------------------------------------------------------------------------------------------------------------------------------------------------------------------------------------------------------------------------------------------------------------------------------------------------------------------------------------------------------------------------------------------------------------------------------------------------------------------|-------------------------|-----------|-----------|----------|-----------|------|-------------------------|--|--|---|---|---|---|-----------|----------|-----------|---|-----------|----------|-----------|---|----------|----------|-----------|---|----------|-----------|----------|---|----------|----------|----------|---|----------|----------|-----------|---|----------|----------|-----------|---|----------|----------|-----------|---|----------|----------|-----------|---|----------|----------|-----------|---|----------|----------|-----------|---|----------|----------|-----------|---|----------|----------|-----------|---|----------|----------|-----------|---|----------|----------|-----------|---|----------|----------|-----------|---|----------|----------|-----------|---|----------|----------|-----------|
|                                                                                                                                                                                                                                                                                                                                                                                                                                                                                                                                                                                                                                                                                                                                                                                                                                                                                                                                                                                                                                                                                                                                                                                                                                                                                                                                                                                                                                                                                                                                                                                                                                        |                         | H         | -3.184984 | 3.502786 | 0.135039  |      |                         |  |  |   |   |   |   |           |          |           |   |           |          |           |   |          |          |           |   |          |           |          |   |          |          |          |   |          |          |           |   |          |          |           |   |          |          |           |   |          |          |           |   |          |          |           |   |          |          |           |   |          |          |           |   |          |          |           |   |          |          |           |   |          |          |           |   |          |          |           |   |          |          |           |   |          |          |           |
|                                                                                                                                                                                                                                                                                                                                                                                                                                                                                                                                                                                                                                                                                                                                                                                                                                                                                                                                                                                                                                                                                                                                                                                                                                                                                                                                                                                                                                                                                                                                                                                                                                        |                         | H         | -3.281826 | 1.813199 | 0.649486  |      |                         |  |  |   |   |   |   |           |          |           |   |           |          |           |   |          |          |           |   |          |           |          |   |          |          |          |   |          |          |           |   |          |          |           |   |          |          |           |   |          |          |           |   |          |          |           |   |          |          |           |   |          |          |           |   |          |          |           |   |          |          |           |   |          |          |           |   |          |          |           |   |          |          |           |   |          |          |           |
|                                                                                                                                                                                                                                                                                                                                                                                                                                                                                                                                                                                                                                                                                                                                                                                                                                                                                                                                                                                                                                                                                                                                                                                                                                                                                                                                                                                                                                                                                                                                                                                                                                        |                         | C         | -5.884089 | 2.816366 | 0.291278  |      |                         |  |  |   |   |   |   |           |          |           |   |           |          |           |   |          |          |           |   |          |           |          |   |          |          |          |   |          |          |           |   |          |          |           |   |          |          |           |   |          |          |           |   |          |          |           |   |          |          |           |   |          |          |           |   |          |          |           |   |          |          |           |   |          |          |           |   |          |          |           |   |          |          |           |   |          |          |           |
|                                                                                                                                                                                                                                                                                                                                                                                                                                                                                                                                                                                                                                                                                                                                                                                                                                                                                                                                                                                                                                                                                                                                                                                                                                                                                                                                                                                                                                                                                                                                                                                                                                        |                         | C         | -6.039343 | 3.866620 | -0.767131 |      |                         |  |  |   |   |   |   |           |          |           |   |           |          |           |   |          |          |           |   |          |           |          |   |          |          |          |   |          |          |           |   |          |          |           |   |          |          |           |   |          |          |           |   |          |          |           |   |          |          |           |   |          |          |           |   |          |          |           |   |          |          |           |   |          |          |           |   |          |          |           |   |          |          |           |   |          |          |           |
|                                                                                                                                                                                                                                                                                                                                                                                                                                                                                                                                                                                                                                                                                                                                                                                                                                                                                                                                                                                                                                                                                                                                                                                                                                                                                                                                                                                                                                                                                                                                                                                                                                        |                         | H         | -6.779009 | 4.633524 | -0.469190 |      |                         |  |  |   |   |   |   |           |          |           |   |           |          |           |   |          |          |           |   |          |           |          |   |          |          |          |   |          |          |           |   |          |          |           |   |          |          |           |   |          |          |           |   |          |          |           |   |          |          |           |   |          |          |           |   |          |          |           |   |          |          |           |   |          |          |           |   |          |          |           |   |          |          |           |   |          |          |           |
|                                                                                                                                                                                                                                                                                                                                                                                                                                                                                                                                                                                                                                                                                                                                                                                                                                                                                                                                                                                                                                                                                                                                                                                                                                                                                                                                                                                                                                                                                                                                                                                                                                        |                         | H         | -5.102219 | 4.398036 | -0.966681 |      |                         |  |  |   |   |   |   |           |          |           |   |           |          |           |   |          |          |           |   |          |           |          |   |          |          |          |   |          |          |           |   |          |          |           |   |          |          |           |   |          |          |           |   |          |          |           |   |          |          |           |   |          |          |           |   |          |          |           |   |          |          |           |   |          |          |           |   |          |          |           |   |          |          |           |   |          |          |           |
|                                                                                                                                                                                                                                                                                                                                                                                                                                                                                                                                                                                                                                                                                                                                                                                                                                                                                                                                                                                                                                                                                                                                                                                                                                                                                                                                                                                                                                                                                                                                                                                                                                        |                         | H         | -6.397723 | 3.442677 | -1.713456 |      |                         |  |  |   |   |   |   |           |          |           |   |           |          |           |   |          |          |           |   |          |           |          |   |          |          |          |   |          |          |           |   |          |          |           |   |          |          |           |   |          |          |           |   |          |          |           |   |          |          |           |   |          |          |           |   |          |          |           |   |          |          |           |   |          |          |           |   |          |          |           |   |          |          |           |   |          |          |           |
|                                                                                                                                                                                                                                                                                                                                                                                                                                                                                                                                                                                                                                                                                                                                                                                                                                                                                                                                                                                                                                                                                                                                                                                                                                                                                                                                                                                                                                                                                                                                                                                                                                        |                         | C         | -6.983664 | 1.814914 | 0.469167  |      |                         |  |  |   |   |   |   |           |          |           |   |           |          |           |   |          |          |           |   |          |           |          |   |          |          |          |   |          |          |           |   |          |          |           |   |          |          |           |   |          |          |           |   |          |          |           |   |          |          |           |   |          |          |           |   |          |          |           |   |          |          |           |   |          |          |           |   |          |          |           |   |          |          |           |   |          |          |           |
|                                                                                                                                                                                                                                                                                                                                                                                                                                                                                                                                                                                                                                                                                                                                                                                                                                                                                                                                                                                                                                                                                                                                                                                                                                                                                                                                                                                                                                                                                                                                                                                                                                        |                         | H         | -7.386285 | 1.478195 | -0.494112 |      |                         |  |  |   |   |   |   |           |          |           |   |           |          |           |   |          |          |           |   |          |           |          |   |          |          |          |   |          |          |           |   |          |          |           |   |          |          |           |   |          |          |           |   |          |          |           |   |          |          |           |   |          |          |           |   |          |          |           |   |          |          |           |   |          |          |           |   |          |          |           |   |          |          |           |   |          |          |           |
|                                                                                                                                                                                                                                                                                                                                                                                                                                                                                                                                                                                                                                                                                                                                                                                                                                                                                                                                                                                                                                                                                                                                                                                                                                                                                                                                                                                                                                                                                                                                                                                                                                        |                         | H         | -6.648150 | 0.932981 | 1.027346  |      |                         |  |  |   |   |   |   |           |          |           |   |           |          |           |   |          |          |           |   |          |           |          |   |          |          |          |   |          |          |           |   |          |          |           |   |          |          |           |   |          |          |           |   |          |          |           |   |          |          |           |   |          |          |           |   |          |          |           |   |          |          |           |   |          |          |           |   |          |          |           |   |          |          |           |   |          |          |           |
|                                                                                                                                                                                                                                                                                                                                                                                                                                                                                                                                                                                                                                                                                                                                                                                                                                                                                                                                                                                                                                                                                                                                                                                                                                                                                                                                                                                                                                                                                                                                                                                                                                        |                         | H         | -7.837680 | 2.237503 | 1.032232  |      |                         |  |  |   |   |   |   |           |          |           |   |           |          |           |   |          |          |           |   |          |           |          |   |          |          |          |   |          |          |           |   |          |          |           |   |          |          |           |   |          |          |           |   |          |          |           |   |          |          |           |   |          |          |           |   |          |          |           |   |          |          |           |   |          |          |           |   |          |          |           |   |          |          |           |   |          |          |           |
|                                                                                                                                                                                                                                                                                                                                                                                                                                                                                                                                                                                                                                                                                                                                                                                                                                                                                                                                                                                                                                                                                                                                                                                                                                                                                                                                                                                                                                                                                                                                                                                                                                        |                         | N         | 0.027659  | 1.099307 | 0.363770  |      |                         |  |  |   |   |   |   |           |          |           |   |           |          |           |   |          |          |           |   |          |           |          |   |          |          |          |   |          |          |           |   |          |          |           |   |          |          |           |   |          |          |           |   |          |          |           |   |          |          |           |   |          |          |           |   |          |          |           |   |          |          |           |   |          |          |           |   |          |          |           |   |          |          |           |   |          |          |           |
|                                                                                                                                                                                                                                                                                                                                                                                                                                                                                                                                                                                                                                                                                                                                                                                                                                                                                                                                                                                                                                                                                                                                                                                                                                                                                                                                                                                                                                                                                                                                                                                                                                        |                         | H         | -0.897423 | 0.954214 | -0.040387 |      |                         |  |  |   |   |   |   |           |          |           |   |           |          |           |   |          |          |           |   |          |           |          |   |          |          |          |   |          |          |           |   |          |          |           |   |          |          |           |   |          |          |           |   |          |          |           |   |          |          |           |   |          |          |           |   |          |          |           |   |          |          |           |   |          |          |           |   |          |          |           |   |          |          |           |   |          |          |           |
|                                                                                                                                                                                                                                                                                                                                                                                                                                                                                                                                                                                                                                                                                                                                                                                                                                                                                                                                                                                                                                                                                                                                                                                                                                                                                                                                                                                                                                                                                                                                                                                                                                        |                         | C         | -4.895343 | 3.045974 | 1.402835  |      |                         |  |  |   |   |   |   |           |          |           |   |           |          |           |   |          |          |           |   |          |           |          |   |          |          |          |   |          |          |           |   |          |          |           |   |          |          |           |   |          |          |           |   |          |          |           |   |          |          |           |   |          |          |           |   |          |          |           |   |          |          |           |   |          |          |           |   |          |          |           |   |          |          |           |   |          |          |           |
|                                                                                                                                                                                                                                                                                                                                                                                                                                                                                                                                                                                                                                                                                                                                                                                                                                                                                                                                                                                                                                                                                                                                                                                                                                                                                                                                                                                                                                                                                                                                                                                                                                        |                         | H         | -5.002127 | 4.073707 | 1.793487  |      |                         |  |  |   |   |   |   |           |          |           |   |           |          |           |   |          |          |           |   |          |           |          |   |          |          |          |   |          |          |           |   |          |          |           |   |          |          |           |   |          |          |           |   |          |          |           |   |          |          |           |   |          |          |           |   |          |          |           |   |          |          |           |   |          |          |           |   |          |          |           |   |          |          |           |   |          |          |           |
|                                                                                                                                                                                                                                                                                                                                                                                                                                                                                                                                                                                                                                                                                                                                                                                                                                                                                                                                                                                                                                                                                                                                                                                                                                                                                                                                                                                                                                                                                                                                                                                                                                        |                         | H         | -5.114535 | 2.373076 | 2.241929  |      |                         |  |  |   |   |   |   |           |          |           |   |           |          |           |   |          |          |           |   |          |           |          |   |          |          |          |   |          |          |           |   |          |          |           |   |          |          |           |   |          |          |           |   |          |          |           |   |          |          |           |   |          |          |           |   |          |          |           |   |          |          |           |   |          |          |           |   |          |          |           |   |          |          |           |   |          |          |           |
| 36                                                                                                                                                                                                                                                                                                                                                                                                                                                                                                                                                                                                                                                                                                                                                                                                                                                                                                                                                                                                                                                                                                                                                                                                                                                                                                                                                                                                                                                                                                                                                                                                                                     |                         |           |           |          |           |      |                         |  |  |   |   |   |   |           |          |           |   |           |          |           |   |          |          |           |   |          |           |          |   |          |          |          |   |          |          |           |   |          |          |           |   |          |          |           |   |          |          |           |   |          |          |           |   |          |          |           |   |          |          |           |   |          |          |           |   |          |          |           |   |          |          |           |   |          |          |           |   |          |          |           |   |          |          |           |
| <table border="1"> <thead> <tr> <th rowspan="2">Atom</th> <th colspan="3">Coordinates (Angstroms)</th> </tr> <tr> <th>X</th> <th>Y</th> <th>Z</th> </tr> </thead> <tbody> <tr> <td>C</td> <td>-2.537839</td> <td>1.163760</td> <td>-0.953438</td> </tr> <tr> <td>N</td> <td>-0.119220</td> <td>1.305893</td> <td>-1.058932</td> </tr> <tr> <td>S</td> <td>1.392378</td> <td>0.970846</td> <td>-0.340390</td> </tr> <tr> <td>O</td> <td>1.439932</td> <td>-0.410998</td> <td>0.131478</td> </tr> <tr> <td>O</td> <td>1.628538</td> <td>2.070554</td> <td>0.599538</td> </tr> <tr> <td>N</td> <td>2.452083</td> <td>1.209080</td> <td>-1.631539</td> </tr> <tr> <td>C</td> <td>3.361065</td> <td>2.389507</td> <td>-1.619646</td> </tr> <tr> <td>H</td> <td>3.622067</td> <td>2.591845</td> <td>-0.580797</td> </tr> <tr> <td>H</td> <td>4.262174</td> <td>2.061640</td> <td>-2.140552</td> </tr> <tr> <td>C</td> <td>2.757746</td> <td>3.626508</td> <td>-2.288334</td> </tr> <tr> <td>H</td> <td>2.477806</td> <td>3.375290</td> <td>-3.318882</td> </tr> <tr> <td>H</td> <td>1.839983</td> <td>3.904917</td> <td>-1.759890</td> </tr> <tr> <td>C</td> <td>3.752377</td> <td>4.796443</td> <td>-2.293115</td> </tr> <tr> <td>H</td> <td>4.001508</td> <td>5.070037</td> <td>-1.256738</td> </tr> <tr> <td>H</td> <td>4.690237</td> <td>4.459265</td> <td>-2.756617</td> </tr> <tr> <td>C</td> <td>3.267813</td> <td>6.057236</td> <td>-3.038192</td> </tr> <tr> <td>H</td> <td>2.992267</td> <td>5.752706</td> <td>-4.059380</td> </tr> <tr> <td>C</td> <td>4.405923</td> <td>7.084256</td> <td>-3.146639</td> </tr> </tbody> </table> |                         |           |           |          |           | Atom | Coordinates (Angstroms) |  |  | X | Y | Z | C | -2.537839 | 1.163760 | -0.953438 | N | -0.119220 | 1.305893 | -1.058932 | S | 1.392378 | 0.970846 | -0.340390 | O | 1.439932 | -0.410998 | 0.131478 | O | 1.628538 | 2.070554 | 0.599538 | N | 2.452083 | 1.209080 | -1.631539 | C | 3.361065 | 2.389507 | -1.619646 | H | 3.622067 | 2.591845 | -0.580797 | H | 4.262174 | 2.061640 | -2.140552 | C | 2.757746 | 3.626508 | -2.288334 | H | 2.477806 | 3.375290 | -3.318882 | H | 1.839983 | 3.904917 | -1.759890 | C | 3.752377 | 4.796443 | -2.293115 | H | 4.001508 | 5.070037 | -1.256738 | H | 4.690237 | 4.459265 | -2.756617 | C | 3.267813 | 6.057236 | -3.038192 | H | 2.992267 | 5.752706 | -4.059380 | C | 4.405923 | 7.084256 | -3.146639 |
| Atom                                                                                                                                                                                                                                                                                                                                                                                                                                                                                                                                                                                                                                                                                                                                                                                                                                                                                                                                                                                                                                                                                                                                                                                                                                                                                                                                                                                                                                                                                                                                                                                                                                   | Coordinates (Angstroms) |           |           |          |           |      |                         |  |  |   |   |   |   |           |          |           |   |           |          |           |   |          |          |           |   |          |           |          |   |          |          |          |   |          |          |           |   |          |          |           |   |          |          |           |   |          |          |           |   |          |          |           |   |          |          |           |   |          |          |           |   |          |          |           |   |          |          |           |   |          |          |           |   |          |          |           |   |          |          |           |   |          |          |           |
|                                                                                                                                                                                                                                                                                                                                                                                                                                                                                                                                                                                                                                                                                                                                                                                                                                                                                                                                                                                                                                                                                                                                                                                                                                                                                                                                                                                                                                                                                                                                                                                                                                        | X                       | Y         | Z         |          |           |      |                         |  |  |   |   |   |   |           |          |           |   |           |          |           |   |          |          |           |   |          |           |          |   |          |          |          |   |          |          |           |   |          |          |           |   |          |          |           |   |          |          |           |   |          |          |           |   |          |          |           |   |          |          |           |   |          |          |           |   |          |          |           |   |          |          |           |   |          |          |           |   |          |          |           |   |          |          |           |
| C                                                                                                                                                                                                                                                                                                                                                                                                                                                                                                                                                                                                                                                                                                                                                                                                                                                                                                                                                                                                                                                                                                                                                                                                                                                                                                                                                                                                                                                                                                                                                                                                                                      | -2.537839               | 1.163760  | -0.953438 |          |           |      |                         |  |  |   |   |   |   |           |          |           |   |           |          |           |   |          |          |           |   |          |           |          |   |          |          |          |   |          |          |           |   |          |          |           |   |          |          |           |   |          |          |           |   |          |          |           |   |          |          |           |   |          |          |           |   |          |          |           |   |          |          |           |   |          |          |           |   |          |          |           |   |          |          |           |   |          |          |           |
| N                                                                                                                                                                                                                                                                                                                                                                                                                                                                                                                                                                                                                                                                                                                                                                                                                                                                                                                                                                                                                                                                                                                                                                                                                                                                                                                                                                                                                                                                                                                                                                                                                                      | -0.119220               | 1.305893  | -1.058932 |          |           |      |                         |  |  |   |   |   |   |           |          |           |   |           |          |           |   |          |          |           |   |          |           |          |   |          |          |          |   |          |          |           |   |          |          |           |   |          |          |           |   |          |          |           |   |          |          |           |   |          |          |           |   |          |          |           |   |          |          |           |   |          |          |           |   |          |          |           |   |          |          |           |   |          |          |           |   |          |          |           |
| S                                                                                                                                                                                                                                                                                                                                                                                                                                                                                                                                                                                                                                                                                                                                                                                                                                                                                                                                                                                                                                                                                                                                                                                                                                                                                                                                                                                                                                                                                                                                                                                                                                      | 1.392378                | 0.970846  | -0.340390 |          |           |      |                         |  |  |   |   |   |   |           |          |           |   |           |          |           |   |          |          |           |   |          |           |          |   |          |          |          |   |          |          |           |   |          |          |           |   |          |          |           |   |          |          |           |   |          |          |           |   |          |          |           |   |          |          |           |   |          |          |           |   |          |          |           |   |          |          |           |   |          |          |           |   |          |          |           |   |          |          |           |
| O                                                                                                                                                                                                                                                                                                                                                                                                                                                                                                                                                                                                                                                                                                                                                                                                                                                                                                                                                                                                                                                                                                                                                                                                                                                                                                                                                                                                                                                                                                                                                                                                                                      | 1.439932                | -0.410998 | 0.131478  |          |           |      |                         |  |  |   |   |   |   |           |          |           |   |           |          |           |   |          |          |           |   |          |           |          |   |          |          |          |   |          |          |           |   |          |          |           |   |          |          |           |   |          |          |           |   |          |          |           |   |          |          |           |   |          |          |           |   |          |          |           |   |          |          |           |   |          |          |           |   |          |          |           |   |          |          |           |   |          |          |           |
| O                                                                                                                                                                                                                                                                                                                                                                                                                                                                                                                                                                                                                                                                                                                                                                                                                                                                                                                                                                                                                                                                                                                                                                                                                                                                                                                                                                                                                                                                                                                                                                                                                                      | 1.628538                | 2.070554  | 0.599538  |          |           |      |                         |  |  |   |   |   |   |           |          |           |   |           |          |           |   |          |          |           |   |          |           |          |   |          |          |          |   |          |          |           |   |          |          |           |   |          |          |           |   |          |          |           |   |          |          |           |   |          |          |           |   |          |          |           |   |          |          |           |   |          |          |           |   |          |          |           |   |          |          |           |   |          |          |           |   |          |          |           |
| N                                                                                                                                                                                                                                                                                                                                                                                                                                                                                                                                                                                                                                                                                                                                                                                                                                                                                                                                                                                                                                                                                                                                                                                                                                                                                                                                                                                                                                                                                                                                                                                                                                      | 2.452083                | 1.209080  | -1.631539 |          |           |      |                         |  |  |   |   |   |   |           |          |           |   |           |          |           |   |          |          |           |   |          |           |          |   |          |          |          |   |          |          |           |   |          |          |           |   |          |          |           |   |          |          |           |   |          |          |           |   |          |          |           |   |          |          |           |   |          |          |           |   |          |          |           |   |          |          |           |   |          |          |           |   |          |          |           |   |          |          |           |
| C                                                                                                                                                                                                                                                                                                                                                                                                                                                                                                                                                                                                                                                                                                                                                                                                                                                                                                                                                                                                                                                                                                                                                                                                                                                                                                                                                                                                                                                                                                                                                                                                                                      | 3.361065                | 2.389507  | -1.619646 |          |           |      |                         |  |  |   |   |   |   |           |          |           |   |           |          |           |   |          |          |           |   |          |           |          |   |          |          |          |   |          |          |           |   |          |          |           |   |          |          |           |   |          |          |           |   |          |          |           |   |          |          |           |   |          |          |           |   |          |          |           |   |          |          |           |   |          |          |           |   |          |          |           |   |          |          |           |   |          |          |           |
| H                                                                                                                                                                                                                                                                                                                                                                                                                                                                                                                                                                                                                                                                                                                                                                                                                                                                                                                                                                                                                                                                                                                                                                                                                                                                                                                                                                                                                                                                                                                                                                                                                                      | 3.622067                | 2.591845  | -0.580797 |          |           |      |                         |  |  |   |   |   |   |           |          |           |   |           |          |           |   |          |          |           |   |          |           |          |   |          |          |          |   |          |          |           |   |          |          |           |   |          |          |           |   |          |          |           |   |          |          |           |   |          |          |           |   |          |          |           |   |          |          |           |   |          |          |           |   |          |          |           |   |          |          |           |   |          |          |           |   |          |          |           |
| H                                                                                                                                                                                                                                                                                                                                                                                                                                                                                                                                                                                                                                                                                                                                                                                                                                                                                                                                                                                                                                                                                                                                                                                                                                                                                                                                                                                                                                                                                                                                                                                                                                      | 4.262174                | 2.061640  | -2.140552 |          |           |      |                         |  |  |   |   |   |   |           |          |           |   |           |          |           |   |          |          |           |   |          |           |          |   |          |          |          |   |          |          |           |   |          |          |           |   |          |          |           |   |          |          |           |   |          |          |           |   |          |          |           |   |          |          |           |   |          |          |           |   |          |          |           |   |          |          |           |   |          |          |           |   |          |          |           |   |          |          |           |
| C                                                                                                                                                                                                                                                                                                                                                                                                                                                                                                                                                                                                                                                                                                                                                                                                                                                                                                                                                                                                                                                                                                                                                                                                                                                                                                                                                                                                                                                                                                                                                                                                                                      | 2.757746                | 3.626508  | -2.288334 |          |           |      |                         |  |  |   |   |   |   |           |          |           |   |           |          |           |   |          |          |           |   |          |           |          |   |          |          |          |   |          |          |           |   |          |          |           |   |          |          |           |   |          |          |           |   |          |          |           |   |          |          |           |   |          |          |           |   |          |          |           |   |          |          |           |   |          |          |           |   |          |          |           |   |          |          |           |   |          |          |           |
| H                                                                                                                                                                                                                                                                                                                                                                                                                                                                                                                                                                                                                                                                                                                                                                                                                                                                                                                                                                                                                                                                                                                                                                                                                                                                                                                                                                                                                                                                                                                                                                                                                                      | 2.477806                | 3.375290  | -3.318882 |          |           |      |                         |  |  |   |   |   |   |           |          |           |   |           |          |           |   |          |          |           |   |          |           |          |   |          |          |          |   |          |          |           |   |          |          |           |   |          |          |           |   |          |          |           |   |          |          |           |   |          |          |           |   |          |          |           |   |          |          |           |   |          |          |           |   |          |          |           |   |          |          |           |   |          |          |           |   |          |          |           |
| H                                                                                                                                                                                                                                                                                                                                                                                                                                                                                                                                                                                                                                                                                                                                                                                                                                                                                                                                                                                                                                                                                                                                                                                                                                                                                                                                                                                                                                                                                                                                                                                                                                      | 1.839983                | 3.904917  | -1.759890 |          |           |      |                         |  |  |   |   |   |   |           |          |           |   |           |          |           |   |          |          |           |   |          |           |          |   |          |          |          |   |          |          |           |   |          |          |           |   |          |          |           |   |          |          |           |   |          |          |           |   |          |          |           |   |          |          |           |   |          |          |           |   |          |          |           |   |          |          |           |   |          |          |           |   |          |          |           |   |          |          |           |
| C                                                                                                                                                                                                                                                                                                                                                                                                                                                                                                                                                                                                                                                                                                                                                                                                                                                                                                                                                                                                                                                                                                                                                                                                                                                                                                                                                                                                                                                                                                                                                                                                                                      | 3.752377                | 4.796443  | -2.293115 |          |           |      |                         |  |  |   |   |   |   |           |          |           |   |           |          |           |   |          |          |           |   |          |           |          |   |          |          |          |   |          |          |           |   |          |          |           |   |          |          |           |   |          |          |           |   |          |          |           |   |          |          |           |   |          |          |           |   |          |          |           |   |          |          |           |   |          |          |           |   |          |          |           |   |          |          |           |   |          |          |           |
| H                                                                                                                                                                                                                                                                                                                                                                                                                                                                                                                                                                                                                                                                                                                                                                                                                                                                                                                                                                                                                                                                                                                                                                                                                                                                                                                                                                                                                                                                                                                                                                                                                                      | 4.001508                | 5.070037  | -1.256738 |          |           |      |                         |  |  |   |   |   |   |           |          |           |   |           |          |           |   |          |          |           |   |          |           |          |   |          |          |          |   |          |          |           |   |          |          |           |   |          |          |           |   |          |          |           |   |          |          |           |   |          |          |           |   |          |          |           |   |          |          |           |   |          |          |           |   |          |          |           |   |          |          |           |   |          |          |           |   |          |          |           |
| H                                                                                                                                                                                                                                                                                                                                                                                                                                                                                                                                                                                                                                                                                                                                                                                                                                                                                                                                                                                                                                                                                                                                                                                                                                                                                                                                                                                                                                                                                                                                                                                                                                      | 4.690237                | 4.459265  | -2.756617 |          |           |      |                         |  |  |   |   |   |   |           |          |           |   |           |          |           |   |          |          |           |   |          |           |          |   |          |          |          |   |          |          |           |   |          |          |           |   |          |          |           |   |          |          |           |   |          |          |           |   |          |          |           |   |          |          |           |   |          |          |           |   |          |          |           |   |          |          |           |   |          |          |           |   |          |          |           |   |          |          |           |
| C                                                                                                                                                                                                                                                                                                                                                                                                                                                                                                                                                                                                                                                                                                                                                                                                                                                                                                                                                                                                                                                                                                                                                                                                                                                                                                                                                                                                                                                                                                                                                                                                                                      | 3.267813                | 6.057236  | -3.038192 |          |           |      |                         |  |  |   |   |   |   |           |          |           |   |           |          |           |   |          |          |           |   |          |           |          |   |          |          |          |   |          |          |           |   |          |          |           |   |          |          |           |   |          |          |           |   |          |          |           |   |          |          |           |   |          |          |           |   |          |          |           |   |          |          |           |   |          |          |           |   |          |          |           |   |          |          |           |   |          |          |           |
| H                                                                                                                                                                                                                                                                                                                                                                                                                                                                                                                                                                                                                                                                                                                                                                                                                                                                                                                                                                                                                                                                                                                                                                                                                                                                                                                                                                                                                                                                                                                                                                                                                                      | 2.992267                | 5.752706  | -4.059380 |          |           |      |                         |  |  |   |   |   |   |           |          |           |   |           |          |           |   |          |          |           |   |          |           |          |   |          |          |          |   |          |          |           |   |          |          |           |   |          |          |           |   |          |          |           |   |          |          |           |   |          |          |           |   |          |          |           |   |          |          |           |   |          |          |           |   |          |          |           |   |          |          |           |   |          |          |           |   |          |          |           |
| C                                                                                                                                                                                                                                                                                                                                                                                                                                                                                                                                                                                                                                                                                                                                                                                                                                                                                                                                                                                                                                                                                                                                                                                                                                                                                                                                                                                                                                                                                                                                                                                                                                      | 4.405923                | 7.084256  | -3.146639 |          |           |      |                         |  |  |   |   |   |   |           |          |           |   |           |          |           |   |          |          |           |   |          |           |          |   |          |          |          |   |          |          |           |   |          |          |           |   |          |          |           |   |          |          |           |   |          |          |           |   |          |          |           |   |          |          |           |   |          |          |           |   |          |          |           |   |          |          |           |   |          |          |           |   |          |          |           |   |          |          |           |

|                                                   |           |           |           |
|---------------------------------------------------|-----------|-----------|-----------|
| H                                                 | 5.281089  | 6.659817  | -3.651813 |
| H                                                 | 4.088415  | 7.968645  | -3.710388 |
| H                                                 | 4.724500  | 7.420999  | -2.151727 |
| C                                                 | 2.029984  | 6.690562  | -2.382726 |
| H                                                 | 1.175088  | 6.007242  | -2.364885 |
| H                                                 | 2.246176  | 6.984934  | -1.347499 |
| H                                                 | 1.720050  | 7.590400  | -2.925951 |
| C                                                 | -1.225436 | 0.860875  | -0.243571 |
| H                                                 | -1.234936 | 1.374865  | 0.729356  |
| H                                                 | -1.172180 | -0.217601 | -0.042117 |
| C                                                 | 1.233906  | -1.515743 | -3.799708 |
| C                                                 | 0.026687  | -2.291916 | -3.272989 |
| H                                                 | -0.842596 | -1.635934 | -3.171260 |
| H                                                 | -0.226141 | -3.093137 | -3.973621 |
| H                                                 | 0.248312  | -2.738757 | -2.299662 |
| C                                                 | 2.471487  | -2.411151 | -3.884243 |
| H                                                 | 3.339386  | -1.863943 | -4.255120 |
| H                                                 | 2.706175  | -2.833937 | -2.902549 |
| H                                                 | 2.264749  | -3.238943 | -4.570104 |
| C                                                 | 0.908911  | -0.818126 | -5.121700 |
| H                                                 | 0.061214  | -0.137359 | -4.997187 |
| H                                                 | 1.764600  | -0.257966 | -5.501077 |
| H                                                 | 0.631117  | -1.573996 | -5.863377 |
| C                                                 | 2.430452  | 0.396575  | -2.785467 |
| O                                                 | 3.239187  | 0.551380  | -3.680264 |
| O                                                 | 1.438537  | -0.488365 | -2.732233 |
| F                                                 | -3.577499 | 0.749696  | -0.188861 |
| F                                                 | -2.701690 | 2.483381  | -1.185163 |
| F                                                 | -2.629331 | 0.527293  | -2.142892 |
| 37                                                |           |           |           |
| Atom                      Coordinates (Angstroms) |           |           |           |
| X                      Y                      Z   |           |           |           |
| -----                                             |           |           |           |
| C                                                 | -2.147133 | 1.042188  | -0.001262 |
| C                                                 | -1.582397 | -0.351611 | 0.341257  |
| H                                                 | -1.321812 | 1.686407  | -0.331525 |
| H                                                 | -2.539536 | 1.469244  | 0.929642  |
| H                                                 | -0.652127 | -0.253848 | 0.898528  |
| H                                                 | -2.287243 | -0.908959 | 0.956617  |
| S                                                 | -2.481702 | -2.154887 | -1.605210 |

*Supporting Information for Sulfamides Direct Radical-Mediated Chlorination*

|   |           |           |           |
|---|-----------|-----------|-----------|
| O | -2.363132 | -3.554570 | -1.189306 |
| O | -2.522960 | -1.843967 | -3.036394 |
| N | -1.275498 | -1.175807 | -0.851578 |
| C | 0.010775  | -1.302242 | -1.394519 |
| O | 0.287755  | -2.121267 | -2.249613 |
| O | 0.837570  | -0.405198 | -0.838388 |
| C | 2.287547  | -0.364306 | -1.189187 |
| C | 2.945754  | -1.696474 | -0.822847 |
| H | 2.579596  | -2.510857 | -1.449064 |
| H | 4.028110  | -1.609363 | -0.962602 |
| H | 2.758656  | -1.941336 | 0.227570  |
| C | 2.447041  | -0.011160 | -2.669701 |
| H | 3.508887  | 0.143236  | -2.887241 |
| H | 2.071683  | -0.807039 | -3.313870 |
| H | 1.915174  | 0.917019  | -2.901876 |
| C | 2.803004  | 0.766153  | -0.296972 |
| H | 3.875093  | 0.906014  | -0.463886 |
| H | 2.292772  | 1.706441  | -0.526469 |
| H | 2.646213  | 0.530983  | 0.760037  |
| N | -3.803547 | -1.504685 | -0.778295 |
| C | -6.118815 | -1.938738 | -0.168849 |
| C | -4.350092 | 2.060841  | -0.970262 |
| H | -4.838452 | 1.935494  | 0.006399  |
| C | -5.402191 | 1.881268  | -2.074809 |
| H | -4.948966 | 1.988280  | -3.067470 |
| H | -5.881070 | 0.899236  | -2.025159 |
| H | -6.190116 | 2.635878  | -1.982789 |
| C | -3.764640 | 3.493218  | -1.018816 |
| H | -4.572692 | 4.227627  | -0.932266 |
| H | -3.056384 | 3.675163  | -0.205128 |
| H | -3.247677 | 3.670245  | -1.969327 |
| C | -3.228704 | 1.038327  | -1.076074 |
| H | -3.712944 | -0.162479 | -0.962047 |
| H | -2.817270 | 0.967905  | -2.090011 |
| C | -5.073573 | -2.037145 | -1.269876 |
| H | -4.976870 | -3.097981 | -1.525366 |
| H | -5.453488 | -1.512291 | -2.153966 |
| F | -6.291810 | -0.661774 | 0.258925  |
| F | -7.318376 | -2.372708 | -0.628738 |
| F | -5.805823 | -2.681339 | 0.913239  |

| 38                                                                                                                                                                                                                                                                                                                                                                                                                                                                                                                                                                                                                                                                                                                                                                                                                                                                                                                                                                                                                                                                                                                                                                                                                                                                                                                                                                                                                                                                                                                                                                                                                                                                                                                                                                                                                                                                                                                                                                                                                                                                                                                                                                                                                                                                                                                                                                                                                                                                                                                                                                                                                                                                                                                                                                                                  | 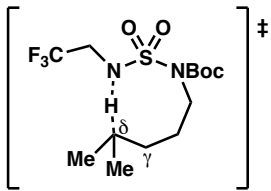 |  |           |                         |  |  |   |           |          |          |   |           |          |           |   |           |          |          |   |           |          |          |   |           |           |           |   |           |           |          |   |           |           |           |   |           |          |           |   |           |          |           |   |           |          |          |   |           |           |           |   |           |          |           |   |           |           |           |   |           |           |           |   |           |           |           |   |           |           |           |   |           |           |          |   |           |          |          |   |           |           |          |   |           |           |           |   |           |           |           |   |          |           |          |   |           |          |           |   |           |           |           |   |           |           |           |   |           |           |           |   |           |           |           |   |           |           |           |   |           |           |           |   |           |           |           |   |           |           |           |   |           |           |           |   |           |           |           |   |           |           |           |   |           |           |           |
|-----------------------------------------------------------------------------------------------------------------------------------------------------------------------------------------------------------------------------------------------------------------------------------------------------------------------------------------------------------------------------------------------------------------------------------------------------------------------------------------------------------------------------------------------------------------------------------------------------------------------------------------------------------------------------------------------------------------------------------------------------------------------------------------------------------------------------------------------------------------------------------------------------------------------------------------------------------------------------------------------------------------------------------------------------------------------------------------------------------------------------------------------------------------------------------------------------------------------------------------------------------------------------------------------------------------------------------------------------------------------------------------------------------------------------------------------------------------------------------------------------------------------------------------------------------------------------------------------------------------------------------------------------------------------------------------------------------------------------------------------------------------------------------------------------------------------------------------------------------------------------------------------------------------------------------------------------------------------------------------------------------------------------------------------------------------------------------------------------------------------------------------------------------------------------------------------------------------------------------------------------------------------------------------------------------------------------------------------------------------------------------------------------------------------------------------------------------------------------------------------------------------------------------------------------------------------------------------------------------------------------------------------------------------------------------------------------------------------------------------------------------------------------------------------------|-----------------------------------------------------------------------------------|------------------------------------------------------------------------------------|-----------|-------------------------|--|--|---|-----------|----------|----------|---|-----------|----------|-----------|---|-----------|----------|----------|---|-----------|----------|----------|---|-----------|-----------|-----------|---|-----------|-----------|----------|---|-----------|-----------|-----------|---|-----------|----------|-----------|---|-----------|----------|-----------|---|-----------|----------|----------|---|-----------|-----------|-----------|---|-----------|----------|-----------|---|-----------|-----------|-----------|---|-----------|-----------|-----------|---|-----------|-----------|-----------|---|-----------|-----------|-----------|---|-----------|-----------|----------|---|-----------|----------|----------|---|-----------|-----------|----------|---|-----------|-----------|-----------|---|-----------|-----------|-----------|---|----------|-----------|----------|---|-----------|----------|-----------|---|-----------|-----------|-----------|---|-----------|-----------|-----------|---|-----------|-----------|-----------|---|-----------|-----------|-----------|---|-----------|-----------|-----------|---|-----------|-----------|-----------|---|-----------|-----------|-----------|---|-----------|-----------|-----------|---|-----------|-----------|-----------|---|-----------|-----------|-----------|---|-----------|-----------|-----------|---|-----------|-----------|-----------|
| <table border="0" style="width: 100%; text-align: center;"> <thead> <tr> <th style="text-align: left;">Atom</th> <th colspan="3">Coordinates (Angstroms)</th> </tr> <tr> <th></th> <th>X</th> <th>Y</th> <th>Z</th> </tr> </thead> </table>                                                                                                                                                                                                                                                                                                                                                                                                                                                                                                                                                                                                                                                                                                                                                                                                                                                                                                                                                                                                                                                                                                                                                                                                                                                                                                                                                                                                                                                                                                                                                                                                                                                                                                                                                                                                                                                                                                                                                                                                                                                                                                                                                                                                                                                                                                                                                                                                                                                                                                                                                         |                                                                                   |                                                                                    | Atom      | Coordinates (Angstroms) |  |  |   | X         | Y        | Z        |   |           |          |           |   |           |          |          |   |           |          |          |   |           |           |           |   |           |           |          |   |           |           |           |   |           |          |           |   |           |          |           |   |           |          |          |   |           |           |           |   |           |          |           |   |           |           |           |   |           |           |           |   |           |           |           |   |           |           |           |   |           |           |          |   |           |          |          |   |           |           |          |   |           |           |           |   |           |           |           |   |          |           |          |   |           |          |           |   |           |           |           |   |           |           |           |   |           |           |           |   |           |           |           |   |           |           |           |   |           |           |           |   |           |           |           |   |           |           |           |   |           |           |           |   |           |           |           |   |           |           |           |   |           |           |           |
| Atom                                                                                                                                                                                                                                                                                                                                                                                                                                                                                                                                                                                                                                                                                                                                                                                                                                                                                                                                                                                                                                                                                                                                                                                                                                                                                                                                                                                                                                                                                                                                                                                                                                                                                                                                                                                                                                                                                                                                                                                                                                                                                                                                                                                                                                                                                                                                                                                                                                                                                                                                                                                                                                                                                                                                                                                                | Coordinates (Angstroms)                                                           |                                                                                    |           |                         |  |  |   |           |          |          |   |           |          |           |   |           |          |          |   |           |          |          |   |           |           |           |   |           |           |          |   |           |           |           |   |           |          |           |   |           |          |           |   |           |          |          |   |           |           |           |   |           |          |           |   |           |           |           |   |           |           |           |   |           |           |           |   |           |           |           |   |           |           |          |   |           |          |          |   |           |           |          |   |           |           |           |   |           |           |           |   |          |           |          |   |           |          |           |   |           |           |           |   |           |           |           |   |           |           |           |   |           |           |           |   |           |           |           |   |           |           |           |   |           |           |           |   |           |           |           |   |           |           |           |   |           |           |           |   |           |           |           |   |           |           |           |
|                                                                                                                                                                                                                                                                                                                                                                                                                                                                                                                                                                                                                                                                                                                                                                                                                                                                                                                                                                                                                                                                                                                                                                                                                                                                                                                                                                                                                                                                                                                                                                                                                                                                                                                                                                                                                                                                                                                                                                                                                                                                                                                                                                                                                                                                                                                                                                                                                                                                                                                                                                                                                                                                                                                                                                                                     | X                                                                                 | Y                                                                                  | Z         |                         |  |  |   |           |          |          |   |           |          |           |   |           |          |          |   |           |          |          |   |           |           |           |   |           |           |          |   |           |           |           |   |           |          |           |   |           |          |           |   |           |          |          |   |           |           |           |   |           |          |           |   |           |           |           |   |           |           |           |   |           |           |           |   |           |           |           |   |           |           |          |   |           |          |          |   |           |           |          |   |           |           |           |   |           |           |           |   |          |           |          |   |           |          |           |   |           |           |           |   |           |           |           |   |           |           |           |   |           |           |           |   |           |           |           |   |           |           |           |   |           |           |           |   |           |           |           |   |           |           |           |   |           |           |           |   |           |           |           |   |           |           |           |
| <table border="0" style="width: 100%; text-align: center;"> <tbody> <tr><td colspan="4">-----</td></tr> <tr><td>C</td><td>-5.492609</td><td>2.026106</td><td>0.000239</td></tr> <tr><td>C</td><td>-4.185078</td><td>2.175925</td><td>-0.785543</td></tr> <tr><td>H</td><td>-5.243438</td><td>1.808580</td><td>1.047503</td></tr> <tr><td>H</td><td>-5.969619</td><td>3.019561</td><td>0.008387</td></tr> <tr><td>C</td><td>-6.163516</td><td>-0.480318</td><td>-0.411855</td></tr> <tr><td>H</td><td>-5.579532</td><td>-0.699601</td><td>0.481181</td></tr> <tr><td>H</td><td>-7.076868</td><td>-1.076148</td><td>-0.377782</td></tr> <tr><td>C</td><td>-6.540184</td><td>1.009234</td><td>-0.484998</td></tr> <tr><td>H</td><td>-6.875793</td><td>1.238938</td><td>-1.500943</td></tr> <tr><td>H</td><td>-7.423782</td><td>1.133944</td><td>0.153770</td></tr> <tr><td>N</td><td>-3.343478</td><td>-0.312568</td><td>-0.260657</td></tr> <tr><td>H</td><td>-3.671738</td><td>1.066722</td><td>-0.643577</td></tr> <tr><td>S</td><td>-3.714213</td><td>-1.326237</td><td>-1.541500</td></tr> <tr><td>O</td><td>-3.471833</td><td>-2.696681</td><td>-1.068402</td></tr> <tr><td>O</td><td>-3.129896</td><td>-0.891671</td><td>-2.808844</td></tr> <tr><td>N</td><td>-5.404876</td><td>-0.978987</td><td>-1.595245</td></tr> <tr><td>C</td><td>-2.032575</td><td>-0.438872</td><td>0.354717</td></tr> <tr><td>H</td><td>-2.015400</td><td>0.248505</td><td>1.204574</td></tr> <tr><td>H</td><td>-1.919583</td><td>-1.456800</td><td>0.747303</td></tr> <tr><td>C</td><td>-0.778555</td><td>-0.139689</td><td>-0.474024</td></tr> <tr><td>F</td><td>-0.495881</td><td>-1.094551</td><td>-1.381850</td></tr> <tr><td>F</td><td>0.289367</td><td>-0.056957</td><td>0.364710</td></tr> <tr><td>F</td><td>-0.860188</td><td>1.039459</td><td>-1.133974</td></tr> <tr><td>C</td><td>-6.184211</td><td>-1.472800</td><td>-2.658098</td></tr> <tr><td>O</td><td>-7.372269</td><td>-1.207551</td><td>-2.742601</td></tr> <tr><td>O</td><td>-5.473434</td><td>-2.239239</td><td>-3.479674</td></tr> <tr><td>C</td><td>-6.036530</td><td>-2.788645</td><td>-4.745159</td></tr> <tr><td>C</td><td>-6.484290</td><td>-1.638802</td><td>-5.650223</td></tr> <tr><td>H</td><td>-6.774258</td><td>-2.044870</td><td>-6.624753</td></tr> <tr><td>H</td><td>-7.338821</td><td>-1.105719</td><td>-5.230209</td></tr> <tr><td>H</td><td>-5.662087</td><td>-0.933850</td><td>-5.807293</td></tr> <tr><td>C</td><td>-7.170814</td><td>-3.762648</td><td>-4.417873</td></tr> <tr><td>H</td><td>-8.029509</td><td>-3.246501</td><td>-3.986197</td></tr> <tr><td>H</td><td>-7.489183</td><td>-4.262382</td><td>-5.338675</td></tr> <tr><td>H</td><td>-6.824974</td><td>-4.529348</td><td>-3.717539</td></tr> </tbody> </table> |                                                                                   |                                                                                    | -----     |                         |  |  | C | -5.492609 | 2.026106 | 0.000239 | C | -4.185078 | 2.175925 | -0.785543 | H | -5.243438 | 1.808580 | 1.047503 | H | -5.969619 | 3.019561 | 0.008387 | C | -6.163516 | -0.480318 | -0.411855 | H | -5.579532 | -0.699601 | 0.481181 | H | -7.076868 | -1.076148 | -0.377782 | C | -6.540184 | 1.009234 | -0.484998 | H | -6.875793 | 1.238938 | -1.500943 | H | -7.423782 | 1.133944 | 0.153770 | N | -3.343478 | -0.312568 | -0.260657 | H | -3.671738 | 1.066722 | -0.643577 | S | -3.714213 | -1.326237 | -1.541500 | O | -3.471833 | -2.696681 | -1.068402 | O | -3.129896 | -0.891671 | -2.808844 | N | -5.404876 | -0.978987 | -1.595245 | C | -2.032575 | -0.438872 | 0.354717 | H | -2.015400 | 0.248505 | 1.204574 | H | -1.919583 | -1.456800 | 0.747303 | C | -0.778555 | -0.139689 | -0.474024 | F | -0.495881 | -1.094551 | -1.381850 | F | 0.289367 | -0.056957 | 0.364710 | F | -0.860188 | 1.039459 | -1.133974 | C | -6.184211 | -1.472800 | -2.658098 | O | -7.372269 | -1.207551 | -2.742601 | O | -5.473434 | -2.239239 | -3.479674 | C | -6.036530 | -2.788645 | -4.745159 | C | -6.484290 | -1.638802 | -5.650223 | H | -6.774258 | -2.044870 | -6.624753 | H | -7.338821 | -1.105719 | -5.230209 | H | -5.662087 | -0.933850 | -5.807293 | C | -7.170814 | -3.762648 | -4.417873 | H | -8.029509 | -3.246501 | -3.986197 | H | -7.489183 | -4.262382 | -5.338675 | H | -6.824974 | -4.529348 | -3.717539 |
| -----                                                                                                                                                                                                                                                                                                                                                                                                                                                                                                                                                                                                                                                                                                                                                                                                                                                                                                                                                                                                                                                                                                                                                                                                                                                                                                                                                                                                                                                                                                                                                                                                                                                                                                                                                                                                                                                                                                                                                                                                                                                                                                                                                                                                                                                                                                                                                                                                                                                                                                                                                                                                                                                                                                                                                                                               |                                                                                   |                                                                                    |           |                         |  |  |   |           |          |          |   |           |          |           |   |           |          |          |   |           |          |          |   |           |           |           |   |           |           |          |   |           |           |           |   |           |          |           |   |           |          |           |   |           |          |          |   |           |           |           |   |           |          |           |   |           |           |           |   |           |           |           |   |           |           |           |   |           |           |           |   |           |           |          |   |           |          |          |   |           |           |          |   |           |           |           |   |           |           |           |   |          |           |          |   |           |          |           |   |           |           |           |   |           |           |           |   |           |           |           |   |           |           |           |   |           |           |           |   |           |           |           |   |           |           |           |   |           |           |           |   |           |           |           |   |           |           |           |   |           |           |           |   |           |           |           |
| C                                                                                                                                                                                                                                                                                                                                                                                                                                                                                                                                                                                                                                                                                                                                                                                                                                                                                                                                                                                                                                                                                                                                                                                                                                                                                                                                                                                                                                                                                                                                                                                                                                                                                                                                                                                                                                                                                                                                                                                                                                                                                                                                                                                                                                                                                                                                                                                                                                                                                                                                                                                                                                                                                                                                                                                                   | -5.492609                                                                         | 2.026106                                                                           | 0.000239  |                         |  |  |   |           |          |          |   |           |          |           |   |           |          |          |   |           |          |          |   |           |           |           |   |           |           |          |   |           |           |           |   |           |          |           |   |           |          |           |   |           |          |          |   |           |           |           |   |           |          |           |   |           |           |           |   |           |           |           |   |           |           |           |   |           |           |           |   |           |           |          |   |           |          |          |   |           |           |          |   |           |           |           |   |           |           |           |   |          |           |          |   |           |          |           |   |           |           |           |   |           |           |           |   |           |           |           |   |           |           |           |   |           |           |           |   |           |           |           |   |           |           |           |   |           |           |           |   |           |           |           |   |           |           |           |   |           |           |           |   |           |           |           |
| C                                                                                                                                                                                                                                                                                                                                                                                                                                                                                                                                                                                                                                                                                                                                                                                                                                                                                                                                                                                                                                                                                                                                                                                                                                                                                                                                                                                                                                                                                                                                                                                                                                                                                                                                                                                                                                                                                                                                                                                                                                                                                                                                                                                                                                                                                                                                                                                                                                                                                                                                                                                                                                                                                                                                                                                                   | -4.185078                                                                         | 2.175925                                                                           | -0.785543 |                         |  |  |   |           |          |          |   |           |          |           |   |           |          |          |   |           |          |          |   |           |           |           |   |           |           |          |   |           |           |           |   |           |          |           |   |           |          |           |   |           |          |          |   |           |           |           |   |           |          |           |   |           |           |           |   |           |           |           |   |           |           |           |   |           |           |           |   |           |           |          |   |           |          |          |   |           |           |          |   |           |           |           |   |           |           |           |   |          |           |          |   |           |          |           |   |           |           |           |   |           |           |           |   |           |           |           |   |           |           |           |   |           |           |           |   |           |           |           |   |           |           |           |   |           |           |           |   |           |           |           |   |           |           |           |   |           |           |           |   |           |           |           |
| H                                                                                                                                                                                                                                                                                                                                                                                                                                                                                                                                                                                                                                                                                                                                                                                                                                                                                                                                                                                                                                                                                                                                                                                                                                                                                                                                                                                                                                                                                                                                                                                                                                                                                                                                                                                                                                                                                                                                                                                                                                                                                                                                                                                                                                                                                                                                                                                                                                                                                                                                                                                                                                                                                                                                                                                                   | -5.243438                                                                         | 1.808580                                                                           | 1.047503  |                         |  |  |   |           |          |          |   |           |          |           |   |           |          |          |   |           |          |          |   |           |           |           |   |           |           |          |   |           |           |           |   |           |          |           |   |           |          |           |   |           |          |          |   |           |           |           |   |           |          |           |   |           |           |           |   |           |           |           |   |           |           |           |   |           |           |           |   |           |           |          |   |           |          |          |   |           |           |          |   |           |           |           |   |           |           |           |   |          |           |          |   |           |          |           |   |           |           |           |   |           |           |           |   |           |           |           |   |           |           |           |   |           |           |           |   |           |           |           |   |           |           |           |   |           |           |           |   |           |           |           |   |           |           |           |   |           |           |           |   |           |           |           |
| H                                                                                                                                                                                                                                                                                                                                                                                                                                                                                                                                                                                                                                                                                                                                                                                                                                                                                                                                                                                                                                                                                                                                                                                                                                                                                                                                                                                                                                                                                                                                                                                                                                                                                                                                                                                                                                                                                                                                                                                                                                                                                                                                                                                                                                                                                                                                                                                                                                                                                                                                                                                                                                                                                                                                                                                                   | -5.969619                                                                         | 3.019561                                                                           | 0.008387  |                         |  |  |   |           |          |          |   |           |          |           |   |           |          |          |   |           |          |          |   |           |           |           |   |           |           |          |   |           |           |           |   |           |          |           |   |           |          |           |   |           |          |          |   |           |           |           |   |           |          |           |   |           |           |           |   |           |           |           |   |           |           |           |   |           |           |           |   |           |           |          |   |           |          |          |   |           |           |          |   |           |           |           |   |           |           |           |   |          |           |          |   |           |          |           |   |           |           |           |   |           |           |           |   |           |           |           |   |           |           |           |   |           |           |           |   |           |           |           |   |           |           |           |   |           |           |           |   |           |           |           |   |           |           |           |   |           |           |           |   |           |           |           |
| C                                                                                                                                                                                                                                                                                                                                                                                                                                                                                                                                                                                                                                                                                                                                                                                                                                                                                                                                                                                                                                                                                                                                                                                                                                                                                                                                                                                                                                                                                                                                                                                                                                                                                                                                                                                                                                                                                                                                                                                                                                                                                                                                                                                                                                                                                                                                                                                                                                                                                                                                                                                                                                                                                                                                                                                                   | -6.163516                                                                         | -0.480318                                                                          | -0.411855 |                         |  |  |   |           |          |          |   |           |          |           |   |           |          |          |   |           |          |          |   |           |           |           |   |           |           |          |   |           |           |           |   |           |          |           |   |           |          |           |   |           |          |          |   |           |           |           |   |           |          |           |   |           |           |           |   |           |           |           |   |           |           |           |   |           |           |           |   |           |           |          |   |           |          |          |   |           |           |          |   |           |           |           |   |           |           |           |   |          |           |          |   |           |          |           |   |           |           |           |   |           |           |           |   |           |           |           |   |           |           |           |   |           |           |           |   |           |           |           |   |           |           |           |   |           |           |           |   |           |           |           |   |           |           |           |   |           |           |           |   |           |           |           |
| H                                                                                                                                                                                                                                                                                                                                                                                                                                                                                                                                                                                                                                                                                                                                                                                                                                                                                                                                                                                                                                                                                                                                                                                                                                                                                                                                                                                                                                                                                                                                                                                                                                                                                                                                                                                                                                                                                                                                                                                                                                                                                                                                                                                                                                                                                                                                                                                                                                                                                                                                                                                                                                                                                                                                                                                                   | -5.579532                                                                         | -0.699601                                                                          | 0.481181  |                         |  |  |   |           |          |          |   |           |          |           |   |           |          |          |   |           |          |          |   |           |           |           |   |           |           |          |   |           |           |           |   |           |          |           |   |           |          |           |   |           |          |          |   |           |           |           |   |           |          |           |   |           |           |           |   |           |           |           |   |           |           |           |   |           |           |           |   |           |           |          |   |           |          |          |   |           |           |          |   |           |           |           |   |           |           |           |   |          |           |          |   |           |          |           |   |           |           |           |   |           |           |           |   |           |           |           |   |           |           |           |   |           |           |           |   |           |           |           |   |           |           |           |   |           |           |           |   |           |           |           |   |           |           |           |   |           |           |           |   |           |           |           |
| H                                                                                                                                                                                                                                                                                                                                                                                                                                                                                                                                                                                                                                                                                                                                                                                                                                                                                                                                                                                                                                                                                                                                                                                                                                                                                                                                                                                                                                                                                                                                                                                                                                                                                                                                                                                                                                                                                                                                                                                                                                                                                                                                                                                                                                                                                                                                                                                                                                                                                                                                                                                                                                                                                                                                                                                                   | -7.076868                                                                         | -1.076148                                                                          | -0.377782 |                         |  |  |   |           |          |          |   |           |          |           |   |           |          |          |   |           |          |          |   |           |           |           |   |           |           |          |   |           |           |           |   |           |          |           |   |           |          |           |   |           |          |          |   |           |           |           |   |           |          |           |   |           |           |           |   |           |           |           |   |           |           |           |   |           |           |           |   |           |           |          |   |           |          |          |   |           |           |          |   |           |           |           |   |           |           |           |   |          |           |          |   |           |          |           |   |           |           |           |   |           |           |           |   |           |           |           |   |           |           |           |   |           |           |           |   |           |           |           |   |           |           |           |   |           |           |           |   |           |           |           |   |           |           |           |   |           |           |           |   |           |           |           |
| C                                                                                                                                                                                                                                                                                                                                                                                                                                                                                                                                                                                                                                                                                                                                                                                                                                                                                                                                                                                                                                                                                                                                                                                                                                                                                                                                                                                                                                                                                                                                                                                                                                                                                                                                                                                                                                                                                                                                                                                                                                                                                                                                                                                                                                                                                                                                                                                                                                                                                                                                                                                                                                                                                                                                                                                                   | -6.540184                                                                         | 1.009234                                                                           | -0.484998 |                         |  |  |   |           |          |          |   |           |          |           |   |           |          |          |   |           |          |          |   |           |           |           |   |           |           |          |   |           |           |           |   |           |          |           |   |           |          |           |   |           |          |          |   |           |           |           |   |           |          |           |   |           |           |           |   |           |           |           |   |           |           |           |   |           |           |           |   |           |           |          |   |           |          |          |   |           |           |          |   |           |           |           |   |           |           |           |   |          |           |          |   |           |          |           |   |           |           |           |   |           |           |           |   |           |           |           |   |           |           |           |   |           |           |           |   |           |           |           |   |           |           |           |   |           |           |           |   |           |           |           |   |           |           |           |   |           |           |           |   |           |           |           |
| H                                                                                                                                                                                                                                                                                                                                                                                                                                                                                                                                                                                                                                                                                                                                                                                                                                                                                                                                                                                                                                                                                                                                                                                                                                                                                                                                                                                                                                                                                                                                                                                                                                                                                                                                                                                                                                                                                                                                                                                                                                                                                                                                                                                                                                                                                                                                                                                                                                                                                                                                                                                                                                                                                                                                                                                                   | -6.875793                                                                         | 1.238938                                                                           | -1.500943 |                         |  |  |   |           |          |          |   |           |          |           |   |           |          |          |   |           |          |          |   |           |           |           |   |           |           |          |   |           |           |           |   |           |          |           |   |           |          |           |   |           |          |          |   |           |           |           |   |           |          |           |   |           |           |           |   |           |           |           |   |           |           |           |   |           |           |           |   |           |           |          |   |           |          |          |   |           |           |          |   |           |           |           |   |           |           |           |   |          |           |          |   |           |          |           |   |           |           |           |   |           |           |           |   |           |           |           |   |           |           |           |   |           |           |           |   |           |           |           |   |           |           |           |   |           |           |           |   |           |           |           |   |           |           |           |   |           |           |           |   |           |           |           |
| H                                                                                                                                                                                                                                                                                                                                                                                                                                                                                                                                                                                                                                                                                                                                                                                                                                                                                                                                                                                                                                                                                                                                                                                                                                                                                                                                                                                                                                                                                                                                                                                                                                                                                                                                                                                                                                                                                                                                                                                                                                                                                                                                                                                                                                                                                                                                                                                                                                                                                                                                                                                                                                                                                                                                                                                                   | -7.423782                                                                         | 1.133944                                                                           | 0.153770  |                         |  |  |   |           |          |          |   |           |          |           |   |           |          |          |   |           |          |          |   |           |           |           |   |           |           |          |   |           |           |           |   |           |          |           |   |           |          |           |   |           |          |          |   |           |           |           |   |           |          |           |   |           |           |           |   |           |           |           |   |           |           |           |   |           |           |           |   |           |           |          |   |           |          |          |   |           |           |          |   |           |           |           |   |           |           |           |   |          |           |          |   |           |          |           |   |           |           |           |   |           |           |           |   |           |           |           |   |           |           |           |   |           |           |           |   |           |           |           |   |           |           |           |   |           |           |           |   |           |           |           |   |           |           |           |   |           |           |           |   |           |           |           |
| N                                                                                                                                                                                                                                                                                                                                                                                                                                                                                                                                                                                                                                                                                                                                                                                                                                                                                                                                                                                                                                                                                                                                                                                                                                                                                                                                                                                                                                                                                                                                                                                                                                                                                                                                                                                                                                                                                                                                                                                                                                                                                                                                                                                                                                                                                                                                                                                                                                                                                                                                                                                                                                                                                                                                                                                                   | -3.343478                                                                         | -0.312568                                                                          | -0.260657 |                         |  |  |   |           |          |          |   |           |          |           |   |           |          |          |   |           |          |          |   |           |           |           |   |           |           |          |   |           |           |           |   |           |          |           |   |           |          |           |   |           |          |          |   |           |           |           |   |           |          |           |   |           |           |           |   |           |           |           |   |           |           |           |   |           |           |           |   |           |           |          |   |           |          |          |   |           |           |          |   |           |           |           |   |           |           |           |   |          |           |          |   |           |          |           |   |           |           |           |   |           |           |           |   |           |           |           |   |           |           |           |   |           |           |           |   |           |           |           |   |           |           |           |   |           |           |           |   |           |           |           |   |           |           |           |   |           |           |           |   |           |           |           |
| H                                                                                                                                                                                                                                                                                                                                                                                                                                                                                                                                                                                                                                                                                                                                                                                                                                                                                                                                                                                                                                                                                                                                                                                                                                                                                                                                                                                                                                                                                                                                                                                                                                                                                                                                                                                                                                                                                                                                                                                                                                                                                                                                                                                                                                                                                                                                                                                                                                                                                                                                                                                                                                                                                                                                                                                                   | -3.671738                                                                         | 1.066722                                                                           | -0.643577 |                         |  |  |   |           |          |          |   |           |          |           |   |           |          |          |   |           |          |          |   |           |           |           |   |           |           |          |   |           |           |           |   |           |          |           |   |           |          |           |   |           |          |          |   |           |           |           |   |           |          |           |   |           |           |           |   |           |           |           |   |           |           |           |   |           |           |           |   |           |           |          |   |           |          |          |   |           |           |          |   |           |           |           |   |           |           |           |   |          |           |          |   |           |          |           |   |           |           |           |   |           |           |           |   |           |           |           |   |           |           |           |   |           |           |           |   |           |           |           |   |           |           |           |   |           |           |           |   |           |           |           |   |           |           |           |   |           |           |           |   |           |           |           |
| S                                                                                                                                                                                                                                                                                                                                                                                                                                                                                                                                                                                                                                                                                                                                                                                                                                                                                                                                                                                                                                                                                                                                                                                                                                                                                                                                                                                                                                                                                                                                                                                                                                                                                                                                                                                                                                                                                                                                                                                                                                                                                                                                                                                                                                                                                                                                                                                                                                                                                                                                                                                                                                                                                                                                                                                                   | -3.714213                                                                         | -1.326237                                                                          | -1.541500 |                         |  |  |   |           |          |          |   |           |          |           |   |           |          |          |   |           |          |          |   |           |           |           |   |           |           |          |   |           |           |           |   |           |          |           |   |           |          |           |   |           |          |          |   |           |           |           |   |           |          |           |   |           |           |           |   |           |           |           |   |           |           |           |   |           |           |           |   |           |           |          |   |           |          |          |   |           |           |          |   |           |           |           |   |           |           |           |   |          |           |          |   |           |          |           |   |           |           |           |   |           |           |           |   |           |           |           |   |           |           |           |   |           |           |           |   |           |           |           |   |           |           |           |   |           |           |           |   |           |           |           |   |           |           |           |   |           |           |           |   |           |           |           |
| O                                                                                                                                                                                                                                                                                                                                                                                                                                                                                                                                                                                                                                                                                                                                                                                                                                                                                                                                                                                                                                                                                                                                                                                                                                                                                                                                                                                                                                                                                                                                                                                                                                                                                                                                                                                                                                                                                                                                                                                                                                                                                                                                                                                                                                                                                                                                                                                                                                                                                                                                                                                                                                                                                                                                                                                                   | -3.471833                                                                         | -2.696681                                                                          | -1.068402 |                         |  |  |   |           |          |          |   |           |          |           |   |           |          |          |   |           |          |          |   |           |           |           |   |           |           |          |   |           |           |           |   |           |          |           |   |           |          |           |   |           |          |          |   |           |           |           |   |           |          |           |   |           |           |           |   |           |           |           |   |           |           |           |   |           |           |           |   |           |           |          |   |           |          |          |   |           |           |          |   |           |           |           |   |           |           |           |   |          |           |          |   |           |          |           |   |           |           |           |   |           |           |           |   |           |           |           |   |           |           |           |   |           |           |           |   |           |           |           |   |           |           |           |   |           |           |           |   |           |           |           |   |           |           |           |   |           |           |           |   |           |           |           |
| O                                                                                                                                                                                                                                                                                                                                                                                                                                                                                                                                                                                                                                                                                                                                                                                                                                                                                                                                                                                                                                                                                                                                                                                                                                                                                                                                                                                                                                                                                                                                                                                                                                                                                                                                                                                                                                                                                                                                                                                                                                                                                                                                                                                                                                                                                                                                                                                                                                                                                                                                                                                                                                                                                                                                                                                                   | -3.129896                                                                         | -0.891671                                                                          | -2.808844 |                         |  |  |   |           |          |          |   |           |          |           |   |           |          |          |   |           |          |          |   |           |           |           |   |           |           |          |   |           |           |           |   |           |          |           |   |           |          |           |   |           |          |          |   |           |           |           |   |           |          |           |   |           |           |           |   |           |           |           |   |           |           |           |   |           |           |           |   |           |           |          |   |           |          |          |   |           |           |          |   |           |           |           |   |           |           |           |   |          |           |          |   |           |          |           |   |           |           |           |   |           |           |           |   |           |           |           |   |           |           |           |   |           |           |           |   |           |           |           |   |           |           |           |   |           |           |           |   |           |           |           |   |           |           |           |   |           |           |           |   |           |           |           |
| N                                                                                                                                                                                                                                                                                                                                                                                                                                                                                                                                                                                                                                                                                                                                                                                                                                                                                                                                                                                                                                                                                                                                                                                                                                                                                                                                                                                                                                                                                                                                                                                                                                                                                                                                                                                                                                                                                                                                                                                                                                                                                                                                                                                                                                                                                                                                                                                                                                                                                                                                                                                                                                                                                                                                                                                                   | -5.404876                                                                         | -0.978987                                                                          | -1.595245 |                         |  |  |   |           |          |          |   |           |          |           |   |           |          |          |   |           |          |          |   |           |           |           |   |           |           |          |   |           |           |           |   |           |          |           |   |           |          |           |   |           |          |          |   |           |           |           |   |           |          |           |   |           |           |           |   |           |           |           |   |           |           |           |   |           |           |           |   |           |           |          |   |           |          |          |   |           |           |          |   |           |           |           |   |           |           |           |   |          |           |          |   |           |          |           |   |           |           |           |   |           |           |           |   |           |           |           |   |           |           |           |   |           |           |           |   |           |           |           |   |           |           |           |   |           |           |           |   |           |           |           |   |           |           |           |   |           |           |           |   |           |           |           |
| C                                                                                                                                                                                                                                                                                                                                                                                                                                                                                                                                                                                                                                                                                                                                                                                                                                                                                                                                                                                                                                                                                                                                                                                                                                                                                                                                                                                                                                                                                                                                                                                                                                                                                                                                                                                                                                                                                                                                                                                                                                                                                                                                                                                                                                                                                                                                                                                                                                                                                                                                                                                                                                                                                                                                                                                                   | -2.032575                                                                         | -0.438872                                                                          | 0.354717  |                         |  |  |   |           |          |          |   |           |          |           |   |           |          |          |   |           |          |          |   |           |           |           |   |           |           |          |   |           |           |           |   |           |          |           |   |           |          |           |   |           |          |          |   |           |           |           |   |           |          |           |   |           |           |           |   |           |           |           |   |           |           |           |   |           |           |           |   |           |           |          |   |           |          |          |   |           |           |          |   |           |           |           |   |           |           |           |   |          |           |          |   |           |          |           |   |           |           |           |   |           |           |           |   |           |           |           |   |           |           |           |   |           |           |           |   |           |           |           |   |           |           |           |   |           |           |           |   |           |           |           |   |           |           |           |   |           |           |           |   |           |           |           |
| H                                                                                                                                                                                                                                                                                                                                                                                                                                                                                                                                                                                                                                                                                                                                                                                                                                                                                                                                                                                                                                                                                                                                                                                                                                                                                                                                                                                                                                                                                                                                                                                                                                                                                                                                                                                                                                                                                                                                                                                                                                                                                                                                                                                                                                                                                                                                                                                                                                                                                                                                                                                                                                                                                                                                                                                                   | -2.015400                                                                         | 0.248505                                                                           | 1.204574  |                         |  |  |   |           |          |          |   |           |          |           |   |           |          |          |   |           |          |          |   |           |           |           |   |           |           |          |   |           |           |           |   |           |          |           |   |           |          |           |   |           |          |          |   |           |           |           |   |           |          |           |   |           |           |           |   |           |           |           |   |           |           |           |   |           |           |           |   |           |           |          |   |           |          |          |   |           |           |          |   |           |           |           |   |           |           |           |   |          |           |          |   |           |          |           |   |           |           |           |   |           |           |           |   |           |           |           |   |           |           |           |   |           |           |           |   |           |           |           |   |           |           |           |   |           |           |           |   |           |           |           |   |           |           |           |   |           |           |           |   |           |           |           |
| H                                                                                                                                                                                                                                                                                                                                                                                                                                                                                                                                                                                                                                                                                                                                                                                                                                                                                                                                                                                                                                                                                                                                                                                                                                                                                                                                                                                                                                                                                                                                                                                                                                                                                                                                                                                                                                                                                                                                                                                                                                                                                                                                                                                                                                                                                                                                                                                                                                                                                                                                                                                                                                                                                                                                                                                                   | -1.919583                                                                         | -1.456800                                                                          | 0.747303  |                         |  |  |   |           |          |          |   |           |          |           |   |           |          |          |   |           |          |          |   |           |           |           |   |           |           |          |   |           |           |           |   |           |          |           |   |           |          |           |   |           |          |          |   |           |           |           |   |           |          |           |   |           |           |           |   |           |           |           |   |           |           |           |   |           |           |           |   |           |           |          |   |           |          |          |   |           |           |          |   |           |           |           |   |           |           |           |   |          |           |          |   |           |          |           |   |           |           |           |   |           |           |           |   |           |           |           |   |           |           |           |   |           |           |           |   |           |           |           |   |           |           |           |   |           |           |           |   |           |           |           |   |           |           |           |   |           |           |           |   |           |           |           |
| C                                                                                                                                                                                                                                                                                                                                                                                                                                                                                                                                                                                                                                                                                                                                                                                                                                                                                                                                                                                                                                                                                                                                                                                                                                                                                                                                                                                                                                                                                                                                                                                                                                                                                                                                                                                                                                                                                                                                                                                                                                                                                                                                                                                                                                                                                                                                                                                                                                                                                                                                                                                                                                                                                                                                                                                                   | -0.778555                                                                         | -0.139689                                                                          | -0.474024 |                         |  |  |   |           |          |          |   |           |          |           |   |           |          |          |   |           |          |          |   |           |           |           |   |           |           |          |   |           |           |           |   |           |          |           |   |           |          |           |   |           |          |          |   |           |           |           |   |           |          |           |   |           |           |           |   |           |           |           |   |           |           |           |   |           |           |           |   |           |           |          |   |           |          |          |   |           |           |          |   |           |           |           |   |           |           |           |   |          |           |          |   |           |          |           |   |           |           |           |   |           |           |           |   |           |           |           |   |           |           |           |   |           |           |           |   |           |           |           |   |           |           |           |   |           |           |           |   |           |           |           |   |           |           |           |   |           |           |           |   |           |           |           |
| F                                                                                                                                                                                                                                                                                                                                                                                                                                                                                                                                                                                                                                                                                                                                                                                                                                                                                                                                                                                                                                                                                                                                                                                                                                                                                                                                                                                                                                                                                                                                                                                                                                                                                                                                                                                                                                                                                                                                                                                                                                                                                                                                                                                                                                                                                                                                                                                                                                                                                                                                                                                                                                                                                                                                                                                                   | -0.495881                                                                         | -1.094551                                                                          | -1.381850 |                         |  |  |   |           |          |          |   |           |          |           |   |           |          |          |   |           |          |          |   |           |           |           |   |           |           |          |   |           |           |           |   |           |          |           |   |           |          |           |   |           |          |          |   |           |           |           |   |           |          |           |   |           |           |           |   |           |           |           |   |           |           |           |   |           |           |           |   |           |           |          |   |           |          |          |   |           |           |          |   |           |           |           |   |           |           |           |   |          |           |          |   |           |          |           |   |           |           |           |   |           |           |           |   |           |           |           |   |           |           |           |   |           |           |           |   |           |           |           |   |           |           |           |   |           |           |           |   |           |           |           |   |           |           |           |   |           |           |           |   |           |           |           |
| F                                                                                                                                                                                                                                                                                                                                                                                                                                                                                                                                                                                                                                                                                                                                                                                                                                                                                                                                                                                                                                                                                                                                                                                                                                                                                                                                                                                                                                                                                                                                                                                                                                                                                                                                                                                                                                                                                                                                                                                                                                                                                                                                                                                                                                                                                                                                                                                                                                                                                                                                                                                                                                                                                                                                                                                                   | 0.289367                                                                          | -0.056957                                                                          | 0.364710  |                         |  |  |   |           |          |          |   |           |          |           |   |           |          |          |   |           |          |          |   |           |           |           |   |           |           |          |   |           |           |           |   |           |          |           |   |           |          |           |   |           |          |          |   |           |           |           |   |           |          |           |   |           |           |           |   |           |           |           |   |           |           |           |   |           |           |           |   |           |           |          |   |           |          |          |   |           |           |          |   |           |           |           |   |           |           |           |   |          |           |          |   |           |          |           |   |           |           |           |   |           |           |           |   |           |           |           |   |           |           |           |   |           |           |           |   |           |           |           |   |           |           |           |   |           |           |           |   |           |           |           |   |           |           |           |   |           |           |           |   |           |           |           |
| F                                                                                                                                                                                                                                                                                                                                                                                                                                                                                                                                                                                                                                                                                                                                                                                                                                                                                                                                                                                                                                                                                                                                                                                                                                                                                                                                                                                                                                                                                                                                                                                                                                                                                                                                                                                                                                                                                                                                                                                                                                                                                                                                                                                                                                                                                                                                                                                                                                                                                                                                                                                                                                                                                                                                                                                                   | -0.860188                                                                         | 1.039459                                                                           | -1.133974 |                         |  |  |   |           |          |          |   |           |          |           |   |           |          |          |   |           |          |          |   |           |           |           |   |           |           |          |   |           |           |           |   |           |          |           |   |           |          |           |   |           |          |          |   |           |           |           |   |           |          |           |   |           |           |           |   |           |           |           |   |           |           |           |   |           |           |           |   |           |           |          |   |           |          |          |   |           |           |          |   |           |           |           |   |           |           |           |   |          |           |          |   |           |          |           |   |           |           |           |   |           |           |           |   |           |           |           |   |           |           |           |   |           |           |           |   |           |           |           |   |           |           |           |   |           |           |           |   |           |           |           |   |           |           |           |   |           |           |           |   |           |           |           |
| C                                                                                                                                                                                                                                                                                                                                                                                                                                                                                                                                                                                                                                                                                                                                                                                                                                                                                                                                                                                                                                                                                                                                                                                                                                                                                                                                                                                                                                                                                                                                                                                                                                                                                                                                                                                                                                                                                                                                                                                                                                                                                                                                                                                                                                                                                                                                                                                                                                                                                                                                                                                                                                                                                                                                                                                                   | -6.184211                                                                         | -1.472800                                                                          | -2.658098 |                         |  |  |   |           |          |          |   |           |          |           |   |           |          |          |   |           |          |          |   |           |           |           |   |           |           |          |   |           |           |           |   |           |          |           |   |           |          |           |   |           |          |          |   |           |           |           |   |           |          |           |   |           |           |           |   |           |           |           |   |           |           |           |   |           |           |           |   |           |           |          |   |           |          |          |   |           |           |          |   |           |           |           |   |           |           |           |   |          |           |          |   |           |          |           |   |           |           |           |   |           |           |           |   |           |           |           |   |           |           |           |   |           |           |           |   |           |           |           |   |           |           |           |   |           |           |           |   |           |           |           |   |           |           |           |   |           |           |           |   |           |           |           |
| O                                                                                                                                                                                                                                                                                                                                                                                                                                                                                                                                                                                                                                                                                                                                                                                                                                                                                                                                                                                                                                                                                                                                                                                                                                                                                                                                                                                                                                                                                                                                                                                                                                                                                                                                                                                                                                                                                                                                                                                                                                                                                                                                                                                                                                                                                                                                                                                                                                                                                                                                                                                                                                                                                                                                                                                                   | -7.372269                                                                         | -1.207551                                                                          | -2.742601 |                         |  |  |   |           |          |          |   |           |          |           |   |           |          |          |   |           |          |          |   |           |           |           |   |           |           |          |   |           |           |           |   |           |          |           |   |           |          |           |   |           |          |          |   |           |           |           |   |           |          |           |   |           |           |           |   |           |           |           |   |           |           |           |   |           |           |           |   |           |           |          |   |           |          |          |   |           |           |          |   |           |           |           |   |           |           |           |   |          |           |          |   |           |          |           |   |           |           |           |   |           |           |           |   |           |           |           |   |           |           |           |   |           |           |           |   |           |           |           |   |           |           |           |   |           |           |           |   |           |           |           |   |           |           |           |   |           |           |           |   |           |           |           |
| O                                                                                                                                                                                                                                                                                                                                                                                                                                                                                                                                                                                                                                                                                                                                                                                                                                                                                                                                                                                                                                                                                                                                                                                                                                                                                                                                                                                                                                                                                                                                                                                                                                                                                                                                                                                                                                                                                                                                                                                                                                                                                                                                                                                                                                                                                                                                                                                                                                                                                                                                                                                                                                                                                                                                                                                                   | -5.473434                                                                         | -2.239239                                                                          | -3.479674 |                         |  |  |   |           |          |          |   |           |          |           |   |           |          |          |   |           |          |          |   |           |           |           |   |           |           |          |   |           |           |           |   |           |          |           |   |           |          |           |   |           |          |          |   |           |           |           |   |           |          |           |   |           |           |           |   |           |           |           |   |           |           |           |   |           |           |           |   |           |           |          |   |           |          |          |   |           |           |          |   |           |           |           |   |           |           |           |   |          |           |          |   |           |          |           |   |           |           |           |   |           |           |           |   |           |           |           |   |           |           |           |   |           |           |           |   |           |           |           |   |           |           |           |   |           |           |           |   |           |           |           |   |           |           |           |   |           |           |           |   |           |           |           |
| C                                                                                                                                                                                                                                                                                                                                                                                                                                                                                                                                                                                                                                                                                                                                                                                                                                                                                                                                                                                                                                                                                                                                                                                                                                                                                                                                                                                                                                                                                                                                                                                                                                                                                                                                                                                                                                                                                                                                                                                                                                                                                                                                                                                                                                                                                                                                                                                                                                                                                                                                                                                                                                                                                                                                                                                                   | -6.036530                                                                         | -2.788645                                                                          | -4.745159 |                         |  |  |   |           |          |          |   |           |          |           |   |           |          |          |   |           |          |          |   |           |           |           |   |           |           |          |   |           |           |           |   |           |          |           |   |           |          |           |   |           |          |          |   |           |           |           |   |           |          |           |   |           |           |           |   |           |           |           |   |           |           |           |   |           |           |           |   |           |           |          |   |           |          |          |   |           |           |          |   |           |           |           |   |           |           |           |   |          |           |          |   |           |          |           |   |           |           |           |   |           |           |           |   |           |           |           |   |           |           |           |   |           |           |           |   |           |           |           |   |           |           |           |   |           |           |           |   |           |           |           |   |           |           |           |   |           |           |           |   |           |           |           |
| C                                                                                                                                                                                                                                                                                                                                                                                                                                                                                                                                                                                                                                                                                                                                                                                                                                                                                                                                                                                                                                                                                                                                                                                                                                                                                                                                                                                                                                                                                                                                                                                                                                                                                                                                                                                                                                                                                                                                                                                                                                                                                                                                                                                                                                                                                                                                                                                                                                                                                                                                                                                                                                                                                                                                                                                                   | -6.484290                                                                         | -1.638802                                                                          | -5.650223 |                         |  |  |   |           |          |          |   |           |          |           |   |           |          |          |   |           |          |          |   |           |           |           |   |           |           |          |   |           |           |           |   |           |          |           |   |           |          |           |   |           |          |          |   |           |           |           |   |           |          |           |   |           |           |           |   |           |           |           |   |           |           |           |   |           |           |           |   |           |           |          |   |           |          |          |   |           |           |          |   |           |           |           |   |           |           |           |   |          |           |          |   |           |          |           |   |           |           |           |   |           |           |           |   |           |           |           |   |           |           |           |   |           |           |           |   |           |           |           |   |           |           |           |   |           |           |           |   |           |           |           |   |           |           |           |   |           |           |           |   |           |           |           |
| H                                                                                                                                                                                                                                                                                                                                                                                                                                                                                                                                                                                                                                                                                                                                                                                                                                                                                                                                                                                                                                                                                                                                                                                                                                                                                                                                                                                                                                                                                                                                                                                                                                                                                                                                                                                                                                                                                                                                                                                                                                                                                                                                                                                                                                                                                                                                                                                                                                                                                                                                                                                                                                                                                                                                                                                                   | -6.774258                                                                         | -2.044870                                                                          | -6.624753 |                         |  |  |   |           |          |          |   |           |          |           |   |           |          |          |   |           |          |          |   |           |           |           |   |           |           |          |   |           |           |           |   |           |          |           |   |           |          |           |   |           |          |          |   |           |           |           |   |           |          |           |   |           |           |           |   |           |           |           |   |           |           |           |   |           |           |           |   |           |           |          |   |           |          |          |   |           |           |          |   |           |           |           |   |           |           |           |   |          |           |          |   |           |          |           |   |           |           |           |   |           |           |           |   |           |           |           |   |           |           |           |   |           |           |           |   |           |           |           |   |           |           |           |   |           |           |           |   |           |           |           |   |           |           |           |   |           |           |           |   |           |           |           |
| H                                                                                                                                                                                                                                                                                                                                                                                                                                                                                                                                                                                                                                                                                                                                                                                                                                                                                                                                                                                                                                                                                                                                                                                                                                                                                                                                                                                                                                                                                                                                                                                                                                                                                                                                                                                                                                                                                                                                                                                                                                                                                                                                                                                                                                                                                                                                                                                                                                                                                                                                                                                                                                                                                                                                                                                                   | -7.338821                                                                         | -1.105719                                                                          | -5.230209 |                         |  |  |   |           |          |          |   |           |          |           |   |           |          |          |   |           |          |          |   |           |           |           |   |           |           |          |   |           |           |           |   |           |          |           |   |           |          |           |   |           |          |          |   |           |           |           |   |           |          |           |   |           |           |           |   |           |           |           |   |           |           |           |   |           |           |           |   |           |           |          |   |           |          |          |   |           |           |          |   |           |           |           |   |           |           |           |   |          |           |          |   |           |          |           |   |           |           |           |   |           |           |           |   |           |           |           |   |           |           |           |   |           |           |           |   |           |           |           |   |           |           |           |   |           |           |           |   |           |           |           |   |           |           |           |   |           |           |           |   |           |           |           |
| H                                                                                                                                                                                                                                                                                                                                                                                                                                                                                                                                                                                                                                                                                                                                                                                                                                                                                                                                                                                                                                                                                                                                                                                                                                                                                                                                                                                                                                                                                                                                                                                                                                                                                                                                                                                                                                                                                                                                                                                                                                                                                                                                                                                                                                                                                                                                                                                                                                                                                                                                                                                                                                                                                                                                                                                                   | -5.662087                                                                         | -0.933850                                                                          | -5.807293 |                         |  |  |   |           |          |          |   |           |          |           |   |           |          |          |   |           |          |          |   |           |           |           |   |           |           |          |   |           |           |           |   |           |          |           |   |           |          |           |   |           |          |          |   |           |           |           |   |           |          |           |   |           |           |           |   |           |           |           |   |           |           |           |   |           |           |           |   |           |           |          |   |           |          |          |   |           |           |          |   |           |           |           |   |           |           |           |   |          |           |          |   |           |          |           |   |           |           |           |   |           |           |           |   |           |           |           |   |           |           |           |   |           |           |           |   |           |           |           |   |           |           |           |   |           |           |           |   |           |           |           |   |           |           |           |   |           |           |           |   |           |           |           |
| C                                                                                                                                                                                                                                                                                                                                                                                                                                                                                                                                                                                                                                                                                                                                                                                                                                                                                                                                                                                                                                                                                                                                                                                                                                                                                                                                                                                                                                                                                                                                                                                                                                                                                                                                                                                                                                                                                                                                                                                                                                                                                                                                                                                                                                                                                                                                                                                                                                                                                                                                                                                                                                                                                                                                                                                                   | -7.170814                                                                         | -3.762648                                                                          | -4.417873 |                         |  |  |   |           |          |          |   |           |          |           |   |           |          |          |   |           |          |          |   |           |           |           |   |           |           |          |   |           |           |           |   |           |          |           |   |           |          |           |   |           |          |          |   |           |           |           |   |           |          |           |   |           |           |           |   |           |           |           |   |           |           |           |   |           |           |           |   |           |           |          |   |           |          |          |   |           |           |          |   |           |           |           |   |           |           |           |   |          |           |          |   |           |          |           |   |           |           |           |   |           |           |           |   |           |           |           |   |           |           |           |   |           |           |           |   |           |           |           |   |           |           |           |   |           |           |           |   |           |           |           |   |           |           |           |   |           |           |           |   |           |           |           |
| H                                                                                                                                                                                                                                                                                                                                                                                                                                                                                                                                                                                                                                                                                                                                                                                                                                                                                                                                                                                                                                                                                                                                                                                                                                                                                                                                                                                                                                                                                                                                                                                                                                                                                                                                                                                                                                                                                                                                                                                                                                                                                                                                                                                                                                                                                                                                                                                                                                                                                                                                                                                                                                                                                                                                                                                                   | -8.029509                                                                         | -3.246501                                                                          | -3.986197 |                         |  |  |   |           |          |          |   |           |          |           |   |           |          |          |   |           |          |          |   |           |           |           |   |           |           |          |   |           |           |           |   |           |          |           |   |           |          |           |   |           |          |          |   |           |           |           |   |           |          |           |   |           |           |           |   |           |           |           |   |           |           |           |   |           |           |           |   |           |           |          |   |           |          |          |   |           |           |          |   |           |           |           |   |           |           |           |   |          |           |          |   |           |          |           |   |           |           |           |   |           |           |           |   |           |           |           |   |           |           |           |   |           |           |           |   |           |           |           |   |           |           |           |   |           |           |           |   |           |           |           |   |           |           |           |   |           |           |           |   |           |           |           |
| H                                                                                                                                                                                                                                                                                                                                                                                                                                                                                                                                                                                                                                                                                                                                                                                                                                                                                                                                                                                                                                                                                                                                                                                                                                                                                                                                                                                                                                                                                                                                                                                                                                                                                                                                                                                                                                                                                                                                                                                                                                                                                                                                                                                                                                                                                                                                                                                                                                                                                                                                                                                                                                                                                                                                                                                                   | -7.489183                                                                         | -4.262382                                                                          | -5.338675 |                         |  |  |   |           |          |          |   |           |          |           |   |           |          |          |   |           |          |          |   |           |           |           |   |           |           |          |   |           |           |           |   |           |          |           |   |           |          |           |   |           |          |          |   |           |           |           |   |           |          |           |   |           |           |           |   |           |           |           |   |           |           |           |   |           |           |           |   |           |           |          |   |           |          |          |   |           |           |          |   |           |           |           |   |           |           |           |   |          |           |          |   |           |          |           |   |           |           |           |   |           |           |           |   |           |           |           |   |           |           |           |   |           |           |           |   |           |           |           |   |           |           |           |   |           |           |           |   |           |           |           |   |           |           |           |   |           |           |           |   |           |           |           |
| H                                                                                                                                                                                                                                                                                                                                                                                                                                                                                                                                                                                                                                                                                                                                                                                                                                                                                                                                                                                                                                                                                                                                                                                                                                                                                                                                                                                                                                                                                                                                                                                                                                                                                                                                                                                                                                                                                                                                                                                                                                                                                                                                                                                                                                                                                                                                                                                                                                                                                                                                                                                                                                                                                                                                                                                                   | -6.824974                                                                         | -4.529348                                                                          | -3.717539 |                         |  |  |   |           |          |          |   |           |          |           |   |           |          |          |   |           |          |          |   |           |           |           |   |           |           |          |   |           |           |           |   |           |          |           |   |           |          |           |   |           |          |          |   |           |           |           |   |           |          |           |   |           |           |           |   |           |           |           |   |           |           |           |   |           |           |           |   |           |           |          |   |           |          |          |   |           |           |          |   |           |           |           |   |           |           |           |   |          |           |          |   |           |          |           |   |           |           |           |   |           |           |           |   |           |           |           |   |           |           |           |   |           |           |           |   |           |           |           |   |           |           |           |   |           |           |           |   |           |           |           |   |           |           |           |   |           |           |           |   |           |           |           |

|    |                                                                                   |                                                                                    |      |                         |           |           |
|----|-----------------------------------------------------------------------------------|------------------------------------------------------------------------------------|------|-------------------------|-----------|-----------|
|    |                                                                                   |                                                                                    | C    | -4.834650               | -3.522954 | -5.340815 |
|    |                                                                                   |                                                                                    | H    | -4.484486               | -4.305408 | -4.661680 |
|    |                                                                                   |                                                                                    | H    | -5.122707               | -3.987104 | -6.288904 |
|    |                                                                                   |                                                                                    | H    | -4.009474               | -2.830002 | -5.525663 |
|    |                                                                                   |                                                                                    | C    | -4.330436               | 2.406934  | -2.282458 |
|    |                                                                                   |                                                                                    | H    | -4.827884               | 3.373354  | -2.452538 |
|    |                                                                                   |                                                                                    | H    | -3.353941               | 2.443232  | -2.773456 |
|    |                                                                                   |                                                                                    | H    | -4.927416               | 1.634123  | -2.770618 |
|    |                                                                                   |                                                                                    | C    | -3.224161               | 3.154702  | -0.119933 |
|    |                                                                                   |                                                                                    | H    | -3.647532               | 4.168560  | -0.165069 |
|    |                                                                                   |                                                                                    | H    | -3.063657               | 2.916646  | 0.937048  |
|    |                                                                                   |                                                                                    | H    | -2.255351               | 3.178261  | -0.625297 |
| 39 | 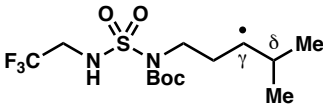 |  |      |                         |           |           |
|    |                                                                                   |                                                                                    | Atom | Coordinates (Angstroms) |           |           |
|    |                                                                                   |                                                                                    |      | X                       | Y         | Z         |
|    |                                                                                   |                                                                                    |      | -----                   |           |           |
|    |                                                                                   |                                                                                    | C    | 1.143479                | -0.911028 | 0.000228  |
|    |                                                                                   |                                                                                    | S    | -0.692169               | -0.026600 | 3.433551  |
|    |                                                                                   |                                                                                    | O    | -1.778846               | -0.853247 | 3.959642  |
|    |                                                                                   |                                                                                    | O    | 0.579793                | 0.092617  | 4.137000  |
|    |                                                                                   |                                                                                    | N    | -1.388917               | 1.519276  | 3.236376  |
|    |                                                                                   |                                                                                    | C    | -0.684316               | 2.633169  | 2.745560  |
|    |                                                                                   |                                                                                    | O    | -1.214540               | 3.727689  | 2.670369  |
|    |                                                                                   |                                                                                    | O    | 0.563821                | 2.325107  | 2.393052  |
|    |                                                                                   |                                                                                    | C    | 1.541805                | 3.390415  | 2.008794  |
|    |                                                                                   |                                                                                    | C    | 1.707367                | 4.373384  | 3.170221  |
|    |                                                                                   |                                                                                    | H    | 2.518553                | 5.068974  | 2.932513  |
|    |                                                                                   |                                                                                    | H    | 0.798133                | 4.950369  | 3.343328  |
|    |                                                                                   |                                                                                    | H    | 1.974997                | 3.840380  | 4.087865  |
|    |                                                                                   |                                                                                    | C    | 1.084350                | 4.066733  | 0.714756  |
|    |                                                                                   |                                                                                    | H    | 0.172517                | 4.645328  | 0.866260  |
|    |                                                                                   |                                                                                    | H    | 1.873865                | 4.741791  | 0.368408  |
|    |                                                                                   |                                                                                    | H    | 0.909585                | 3.320111  | -0.065781 |
|    |                                                                                   |                                                                                    | C    | 2.828812                | 2.595240  | 1.786030  |
|    |                                                                                   |                                                                                    | H    | 2.712278                | 1.886082  | 0.962103  |
|    |                                                                                   |                                                                                    | H    | 3.640320                | 3.282202  | 1.528738  |
|    |                                                                                   |                                                                                    | H    | 3.111817                | 2.051212  | 2.691850  |
|    |                                                                                   |                                                                                    | C    | -2.836717               | 1.697693  | 3.526884  |
|    |                                                                                   |                                                                                    | H    | -3.105346               | 1.006102  | 4.323117  |
|    |                                                                                   |                                                                                    | H    | -2.936349               | 2.716302  | 3.903532  |
|    |                                                                                   |                                                                                    | C    | -3.735145               | 1.491491  | 2.296191  |



Supporting Information for Sulfamides Direct Radical-Mediated Chlorination

|    |                                                                                     |                                                                                      |                         |           |           |
|----|-------------------------------------------------------------------------------------|--------------------------------------------------------------------------------------|-------------------------|-----------|-----------|
|    |                                                                                     | H                                                                                    | -3.336943               | 2.116591  | 1.478286  |
|    |                                                                                     | H                                                                                    | -3.663607               | 0.450074  | 1.957009  |
|    |                                                                                     | C                                                                                    | -6.484312               | 1.528227  | 0.458917  |
|    |                                                                                     | H                                                                                    | -6.727763               | 2.593935  | 0.375445  |
|    |                                                                                     | H                                                                                    | -5.569290               | 1.344900  | -0.114065 |
|    |                                                                                     | H                                                                                    | -7.295752               | 0.955955  | -0.006624 |
|    |                                                                                     | C                                                                                    | -7.622449               | 1.345625  | 2.721263  |
|    |                                                                                     | H                                                                                    | -8.451887               | 0.799127  | 2.258920  |
|    |                                                                                     | H                                                                                    | -7.530826               | 1.010703  | 3.759882  |
|    |                                                                                     | H                                                                                    | -7.888949               | 2.409810  | 2.732717  |
|    |                                                                                     | N                                                                                    | -0.382948               | -0.575595 | 1.869315  |
|    |                                                                                     | H                                                                                    | -1.092779               | -1.263104 | 1.627507  |
|    |                                                                                     | C                                                                                    | -5.161251               | 1.839390  | 2.584293  |
|    |                                                                                     | H                                                                                    | -5.360391               | 2.785540  | 3.089158  |
|    |                                                                                     | C                                                                                    | -6.313573               | 1.121305  | 1.945960  |
|    |                                                                                     | H                                                                                    | -6.087987               | 0.042859  | 1.956271  |
|    |                                                                                     | C                                                                                    | 0.978035                | -0.961664 | 1.510818  |
|    |                                                                                     | H                                                                                    | 1.241329                | -1.974444 | 1.836706  |
|    |                                                                                     | H                                                                                    | 1.680151                | -0.258791 | 1.957611  |
|    |                                                                                     | F                                                                                    | 0.972261                | 0.325292  | -0.513769 |
|    |                                                                                     | F                                                                                    | 2.386061                | -1.327217 | -0.344355 |
|    |                                                                                     | F                                                                                    | 0.256238                | -1.728674 | -0.626242 |
| 40 | 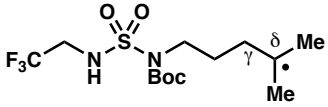 |  |                         |           |           |
|    |                                                                                     | Atom                                                                                 | Coordinates (Angstroms) |           |           |
|    |                                                                                     |                                                                                      | X                       | Y         | Z         |
|    |                                                                                     |                                                                                      | -----                   |           |           |
|    |                                                                                     | C                                                                                    | -5.476426               | 1.838953  | 0.001943  |
|    |                                                                                     | S                                                                                    | -7.425896               | 4.368807  | 1.609668  |
|    |                                                                                     | O                                                                                    | -8.507557               | 3.555986  | 2.163678  |
|    |                                                                                     | O                                                                                    | -6.177358               | 4.567403  | 2.335883  |
|    |                                                                                     | N                                                                                    | -8.164137               | 5.880087  | 1.287908  |
|    |                                                                                     | C                                                                                    | -7.490427               | 6.961382  | 0.697841  |
|    |                                                                                     | O                                                                                    | -8.042298               | 8.035903  | 0.532543  |
|    |                                                                                     | O                                                                                    | -6.238499               | 6.648340  | 0.358282  |
|    |                                                                                     | C                                                                                    | -5.295484               | 7.681878  | -0.162325 |
|    |                                                                                     | C                                                                                    | -5.113173               | 8.782704  | 0.885346  |
|    |                                                                                     | H                                                                                    | -4.323456               | 9.463924  | 0.552545  |
|    |                                                                                     | H                                                                                    | -6.028796               | 9.358303  | 1.026916  |
|    |                                                                                     | H                                                                                    | -4.808449               | 8.351424  | 1.843874  |
|    |                                                                                     | C                                                                                    | -5.801344               | 8.215821  | -1.504538 |

|   |            |          |           |
|---|------------|----------|-----------|
| H | -6.720282  | 8.790872 | -1.386561 |
| H | -5.035416  | 8.865069 | -1.941174 |
| H | -5.982979  | 7.391111 | -2.201177 |
| C | -4.002173  | 6.886037 | -0.343391 |
| H | -4.136521  | 6.083728 | -1.075064 |
| H | -3.212642  | 7.549778 | -0.707636 |
| H | -3.677721  | 6.450228 | 0.605796  |
| C | -9.592820  | 6.075455 | 1.652943  |
| H | -9.800106  | 5.452743 | 2.522748  |
| H | -9.680833  | 7.121835 | 1.949691  |
| C | -10.557227 | 5.756029 | 0.508159  |
| H | -10.289470 | 6.360370 | -0.365807 |
| H | -10.456132 | 4.702004 | 0.223971  |
| C | -13.012311 | 5.790969 | -0.202605 |
| C | -13.149310 | 6.817678 | -1.286015 |
| H | -13.884697 | 7.597959 | -1.013368 |
| H | -12.205220 | 7.335902 | -1.488477 |
| H | -13.502232 | 6.375182 | -2.225876 |
| C | -14.113602 | 4.793117 | -0.016503 |
| H | -14.506613 | 4.437848 | -0.977066 |
| H | -13.783414 | 3.921873 | 0.561326  |
| H | -14.973149 | 5.225735 | 0.530176  |
| N | -7.036472  | 3.780533 | 0.090390  |
| H | -7.806871  | 3.261712 | -0.321133 |
| C | -12.025112 | 6.033272 | 0.907588  |
| H | -12.093194 | 7.081229 | 1.248856  |
| H | -12.277146 | 5.408721 | 1.774530  |
| F | -6.357522  | 1.093146 | -0.718685 |
| F | -4.230168  | 1.481612 | -0.392266 |
| F | -5.618905  | 1.478632 | 1.293627  |
| C | -5.695036  | 3.330628 | -0.230269 |
| H | -4.977511  | 3.883129 | 0.376170  |
| H | -5.488881  | 3.529406 | -1.286094 |

## XVI. References.

<sup>1</sup> Mintz, M.J.; Walling, C. *Org. Synth.* **1969**, *49*, 9.

<sup>2</sup> Johnson, R. C. *J. Chem. Ed.* **1970**, *47*, 702.

<sup>3</sup> Kanegusuku, A. L. G.; Castanheiro, T.; Ayer, S. K.; Roizen, J. L. *unpublished results*.

<sup>4</sup> Zhao, R.; Lu, W. *Org. Lett.* **2017**, *19*, 1768–1771.

<sup>5</sup> Govindarajan, S.R.; Xu, Y.; Swanson, J.P.; Jain, T.; Lu, Y.; Choi, J.-W.; Joy, A. *Macromolecules.* **2016**, *49*, 2429.

<sup>6</sup> a) Quinn, R.K.; Könst, Z.A.; Michalak, S.E.; Schmidt, Y.; Szklarski, A.R.; Flores, A.R.; Nam, S.; Horne, D.A.; Vanderwal, C.D.; Alexanian, E.J. *J. Am. Chem. Soc.* **2016**, *138*, 696.

- b) Characterization data: Short, M. A.; Blackburn, J. M.; Roizen, J. L. *Angew. Chem. Int. Ed.* **2018**, *57*, 296.
- <sup>7</sup> Mustafa, D.; Ma, D.; Zhou, W.; Meisenheimer, P.; Cali, J. J. *Bioconjugate Chem.* **2016**, *27*, 87–101.
- <sup>8</sup> McCune, C. D.; Beio, M. L.; Sturdivant, J. M.; Salud-Bea, R. de la; Darnell, B. M.; Berkowitz, D. B. *J. Am. Chem. Soc.* **2017**, *139*, 14077–14089.
- <sup>9</sup> Carocci, A.; Catalano, A.; Corbo, F.; Duranti, A.; Amoroso, R.; Franchini, C.; Lentini, G.; Tortorella, V. *Tetrahedron: Asymmetry*, **2000**, *11*, 3619.
- <sup>10</sup> a) Koppenhoefer, B.; Schurig, V. *Org. Synth.* **1988**, *66*, 151; b) Koppenhoefer, B.; Schurig, V. *Org. Synth.* **1988**, *66*, 160.
- <sup>11</sup> Blackburn, J. M.; Short, M. A.; Castanheiro, T.; Ayer, S. K.; Muellers, T. D.; Roizen, J. L. *Org. Lett.* **2017**, *19*, 6012.
- <sup>12</sup> Skvorcova, M.; Jirgensons, A. *Org. Lett.* **2017**, *10*, 2478.
- <sup>13</sup> Thottumkara, A. P.; Bowsher, M. S.; Vinod, T. K. *Org. Lett.* **2005**, *7*, 2933.
- <sup>14</sup> Wong, M.-K.; Chung, N.-W.; He, L.; Yang, D. *J. Am. Chem. Soc.* **2003**, *125*, 158.
- <sup>15</sup> Mukherjee, S.; Maji, B.; Tlahuext-Aca, A.; Glorius, F. *J. Am. Chem. Soc.* **2016**, *138*, 16200.
- <sup>16</sup> Suthagar, K.; Watson, A. J. A.; Wilkinson, B. L.; Fairbanks, A. J. *Eur. J. Med. Chem.* **2015**, *102*, 153.
- <sup>17</sup> Masui, T.; Kabaki, M.; Watanabe, H.; Kobayashi, T. Masui, Y. *Org. Process Res. Dev.* **2004**, *8*, 408.
- <sup>18</sup> Kurokawa, T.; Kim, M.; Du Bois, J. *Angew. Chem. Int. Ed.* **2009**, *48*, 2777.
- <sup>19</sup> Shehata, M. F.; Short, M. A.; Sanders, M. A.; Roizen, J. L.; *Tetrahedron*, **2019**, *75*, 3186.
- <sup>20</sup> Cismesia, M. A., Yoon, T. P. *Chem. Sci.* **2015**, *6*, 5426.
- <sup>21</sup> Hatchard, C.G.; Parker, C.A. *Proc. R. Soc. Lond. A.* **1956**, *235*, 518.
- <sup>22</sup> R. G. Parr, W. Yang, *Density-Functional Theory of Atoms and Molecules* 1989, Oxford University Press, Oxford U.K.
- <sup>23</sup> M. J. Frisch, G. W. Trucks, H. B. Schlegel, G. E. Scuseria, M. A. Robb, J. R. Cheeseman, G. Scalmani, V. Barone, E. Mennucci, G. A. Petersson, H. Nakatsuji, M. Caricato, X. Li, H. P. Hratchian, A. F. Izmaylov, J. Bloino, G. Zheng, J. L. Sonnenberg, M. Hada, M. Ehara, K. Toyota, R. Fukuda, J. Hasegawa, M. Ishida, T. Nakajima, Y. Honda, O. Kitao, H. Nakai, T. Vreven, J. A. Montgomery Jr., J. E. Peralta, F. Ogliaro, M. Bearpark, J. J. Heyd, E. Brothers, K. N. Kudin, V. N. Staroverov, T. Keith, R. Kobayashi, J. Normand, K. Raghavachari, A. Rendell, J. C. Burant, S. S. Iyengar, J. Tomasi, M. Cossi, N. Rega, J. M. Millam, M. Klene, J. E. Knox, J. B. Cross, V. Bakken, C. Adamo, J. Jaramillo, R. Gomperts, R. E. Stratmann, O. Yazyev, A. J. Austin, R. Cammi, C. Pomelli, J. W. Ochterski, R. L. Martin, K. Morokuma, V. G. Zakrzewski, G. A. Voth, P. Salvador, J. J. Dannenberg, S. Dapprich, A. D. Daniels, O. Farkas, J. B. Foresman, J. V. Ortiz, J. Cioslowski, D. J. Fox, Gaussian 09, revision D.01; Gaussian, Inc. Wallingford, CT, 2013.
- <sup>24</sup> M. J. Frisch, G. W. Trucks, H. B. Schlegel, G. E. Scuseria, M. A. Robb, J. R. Cheeseman, G. Scalmani, V. Barone, G. A. Petersson, H. Nakatsuji, X. Li, M. Caricato, A. V. Marenich, J. Bloino, B. G. Janesko, R. Gomperts, B. Mennucci, H. P. Hratchian, J. V. Ortiz, A. F. Izmaylov, J. L. Sonnenberg, D. Williams-Young, F. Ding, F. Lipparini, F. Egidi, J. Goings, B. Peng, A. Petrone, T. Henderson, D. Ranasinghe, V. G. Zakrzewski, J. Gao, N. Rega, G. Zheng, W. Liang, M. Hada, M. Ehara, K. Toyota, R. Fukuda, J. Hasegawa, M. Ishida, T. Nakajima, Y. Honda, O.

Kitao, H. Nakai, T. Vreven, K. Throssell, J. A. Montgomery, Jr., J. E. Peralta, F. Ogliaro, M. J. Bearpark, J. J. Heyd, E. N. Brothers, K. N. Kudin, V. N. Staroverov, T. A. Keith, R. Kobayashi, J. Normand, K. Raghavachari, A. P. Rendell, J. C. Burant, S. S. Iyengar, J. Tomasi, M. Cossi, J. M. Millam, M. Klene, C. Adamo, R. Cammi, J. W. Ochterski, R. L. Martin, K. Morokuma, O. Farkas, J. B. Foresman, and D. J. Fox, Gaussian 16, revision B.01, Gaussian, Inc., Wallingford CT, 2016.

<sup>25</sup> R. Dennington, T. Keith, J. Millam, GaussView 2009, version 5; Semichem Inc.: Shawnee Mission, KS, 2009.

<sup>26</sup> a) Stephens, P. J.; Devlin, F. J.; Chabalowski, C. F.; Frisch, M. J. *J. Chem. Phys.* **1994**, *98*, 11623; b) Becke, A. D. *J. Chem. Phys.* **1993**, *98*, 1372; c) Becke, A. D. *J. Phys. Chem.* **1993**, *98*, 5648; d) Lee, C.; Yang, W.; Parr, R. G. *Phys. Rev. B* **1988**, *37*, 785.

<sup>27</sup> Svejstrup, T. D.; Zawodny, W.; Douglas, J. J.; Bidgeli, D.; Sheikh, N. S.; Leonori, D. *Chem. Commun.* **2016**, *52*, 12302.

<sup>28</sup> Morcillo, S. P.; Dauncey, E. M.; Kim, J. H.; Douglas, J. J.; Sheikh, N. S.; Leonori, D. *Angew. Chem. Int. Ed.* **2018**, *57*, 12945.

<sup>29</sup> Bootsma, A. N.; Wheeler, S. E. "Popular Integration Grids Can Result in Large Errors in DFT-Computed Free Energies," *ChemRxiv. Pre-print*. DOI:10.26434/chemrxiv.8864204.v5.

<sup>30</sup> Grimme, S. *Chem. Eur. J.* **2012**, *18*, 999955.

<sup>31</sup> Ribeiro, R. F.; Marenich, A. V.; Cramer, C. J.; Truhlar, D. G. *J. Phys. Chem. B*, **2011**, *115*, 14556.

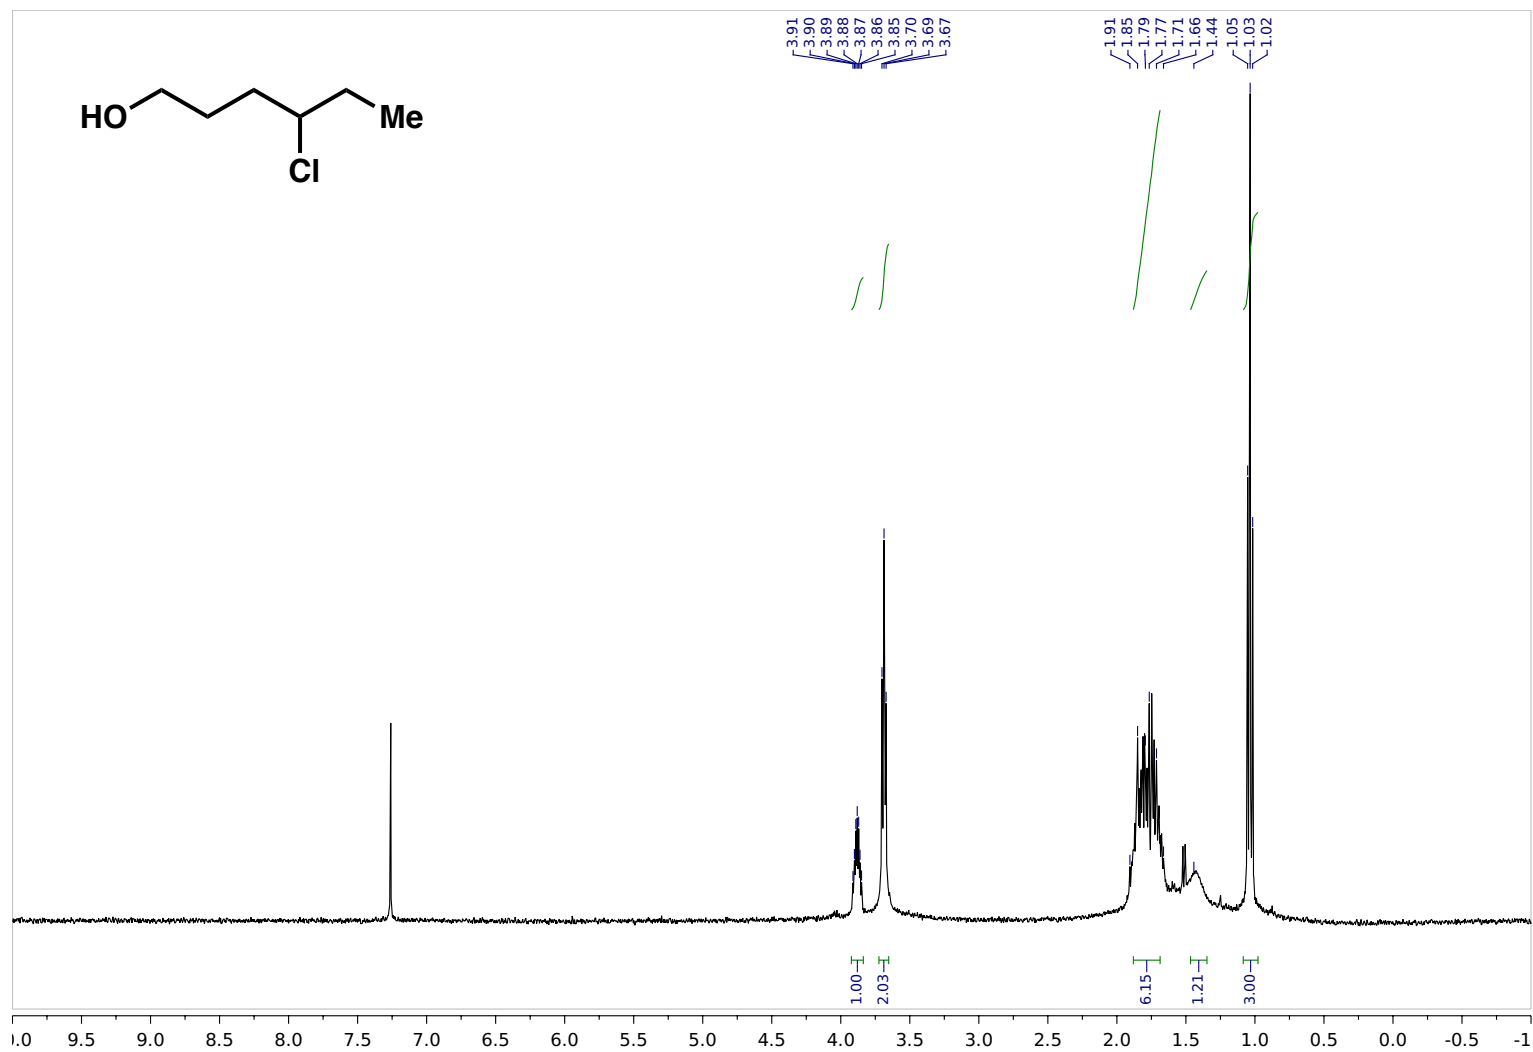

<sup>1</sup>H NMR (400 MHz, CDCl<sub>3</sub>) for 4-chlorohexanol (S1)

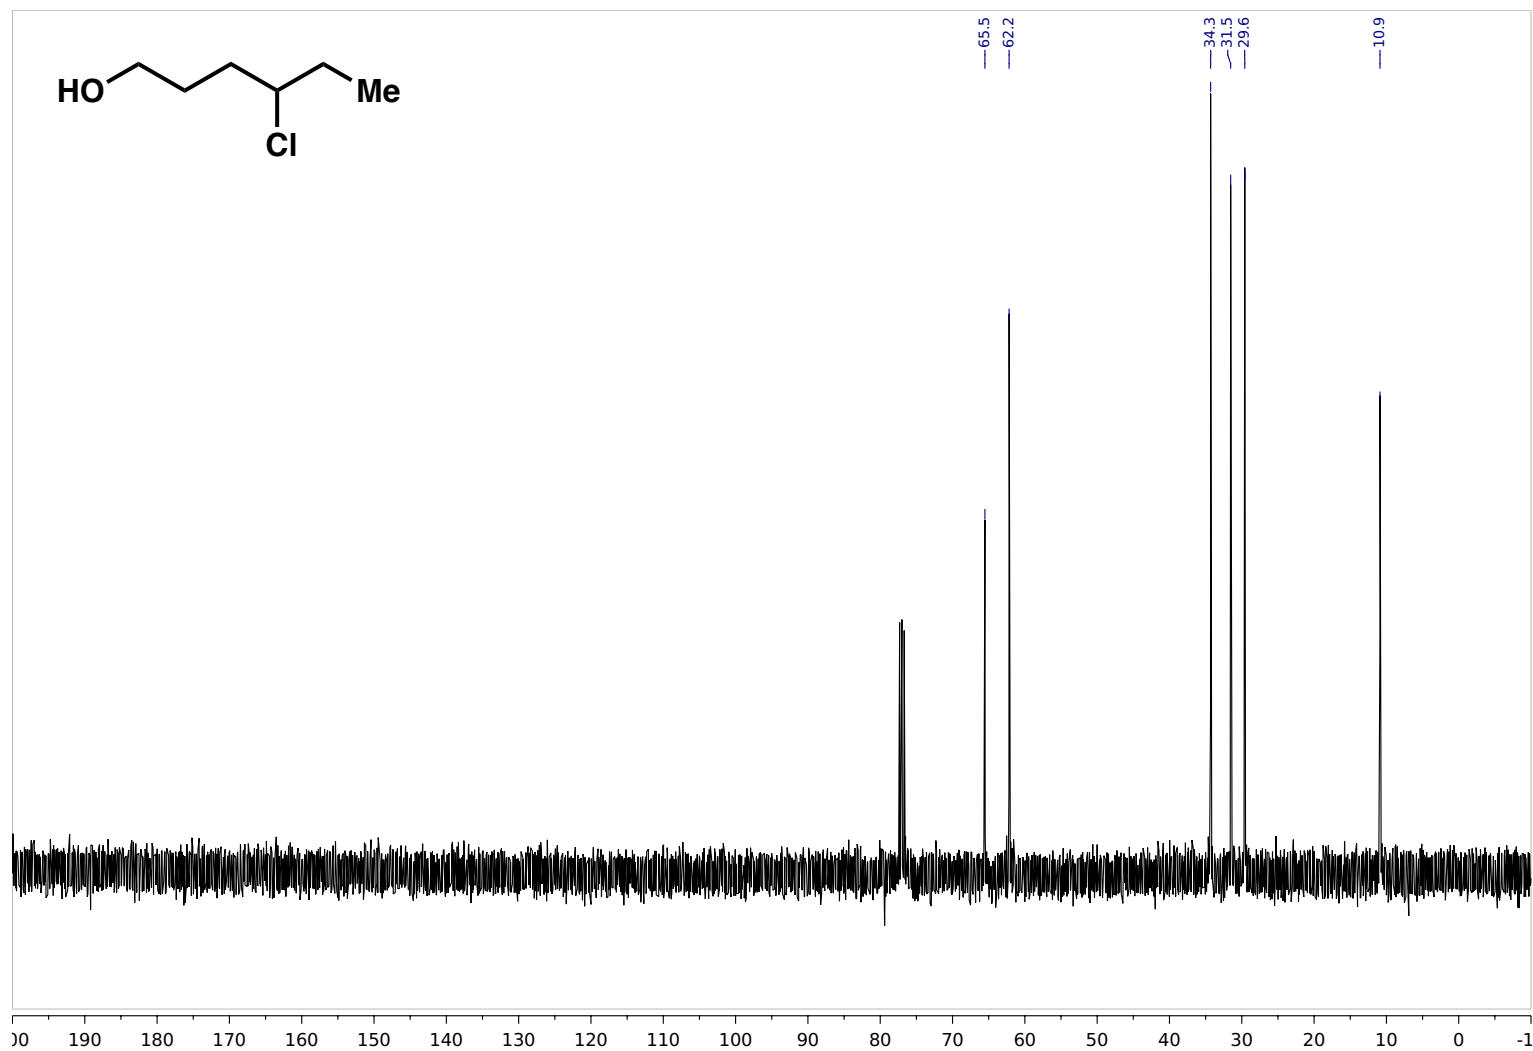

<sup>13</sup>C NMR (101 MHz, CDCl<sub>3</sub>) for 4-chlorohexanol (S1)

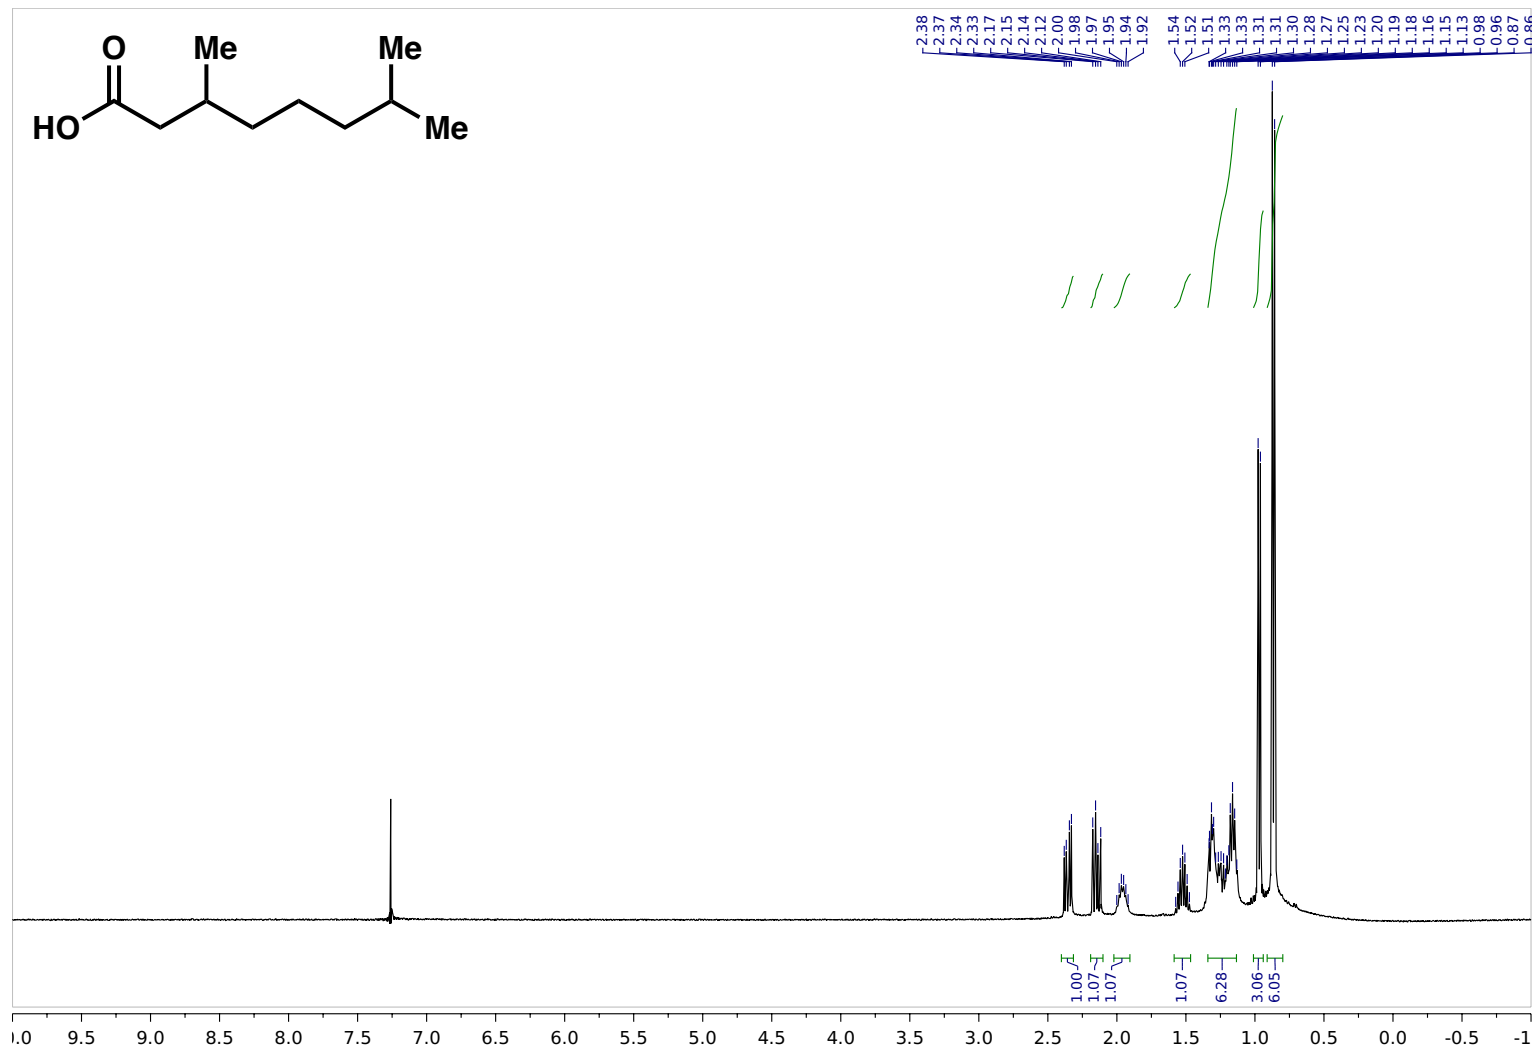

<sup>1</sup>H NMR (400 MHz, CDCl<sub>3</sub>) for 3,7-dimethyloctanoic acid (S2h)

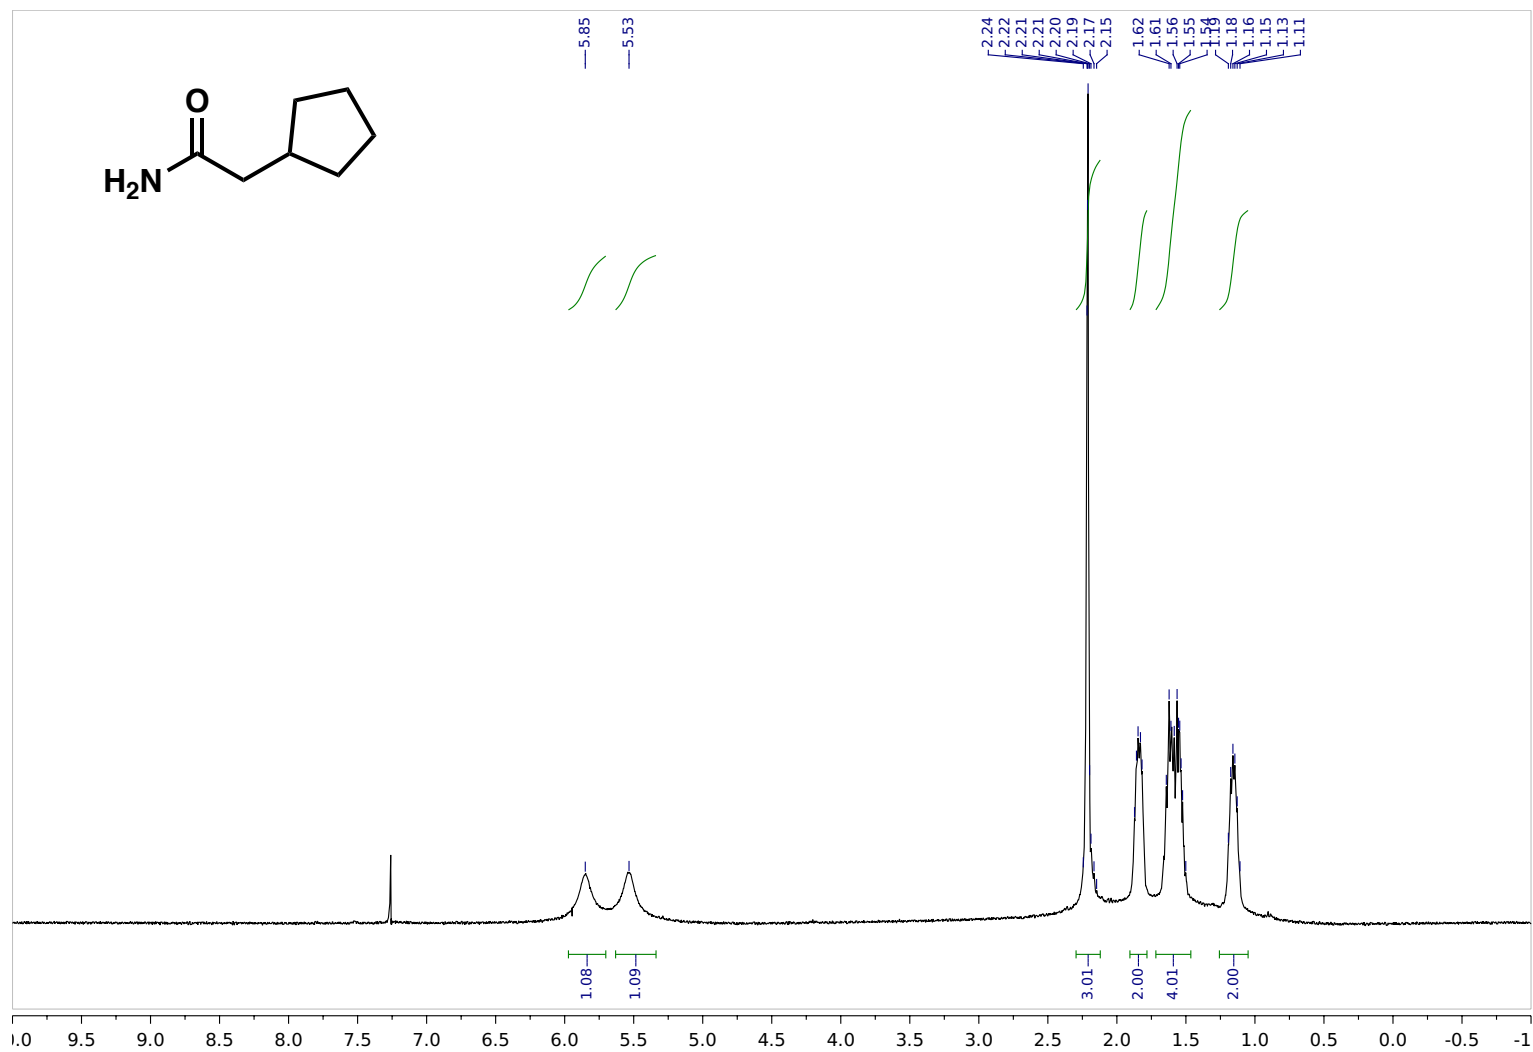

<sup>1</sup>H NMR (400 MHz, CDCl<sub>3</sub>) for 2-cyclopentylacetamide (S3d)



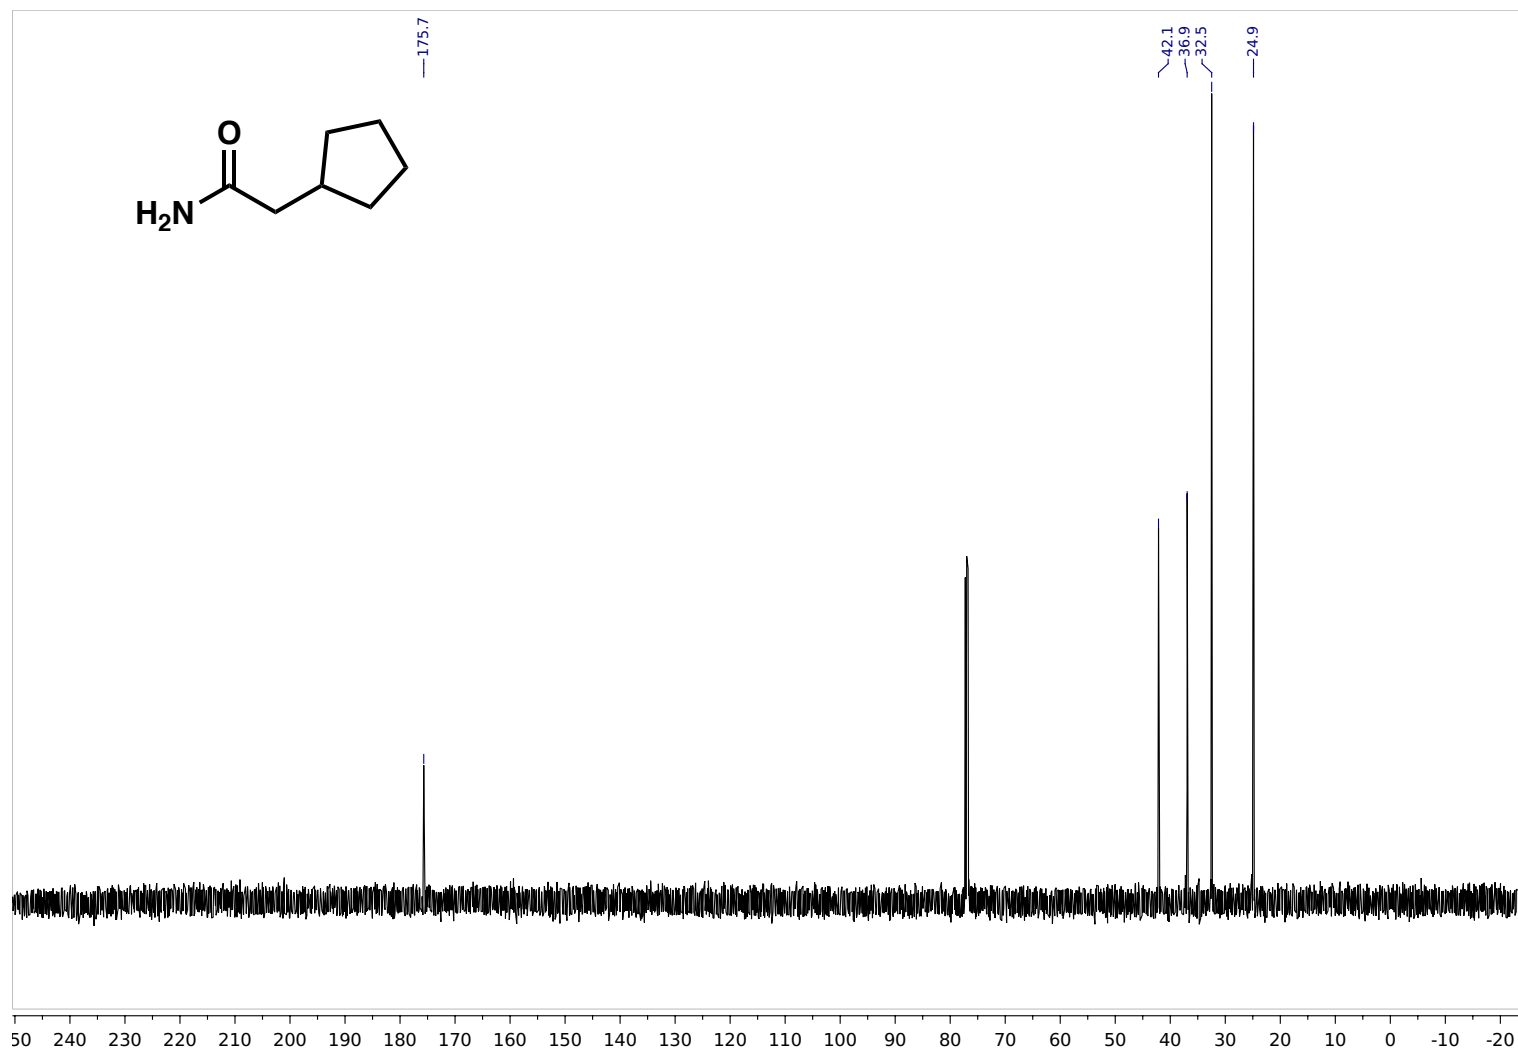

$^{13}\text{C}$  NMR (126 MHz,  $\text{CDCl}_3$ ) for 2-cyclopentylacetamide (S3d)

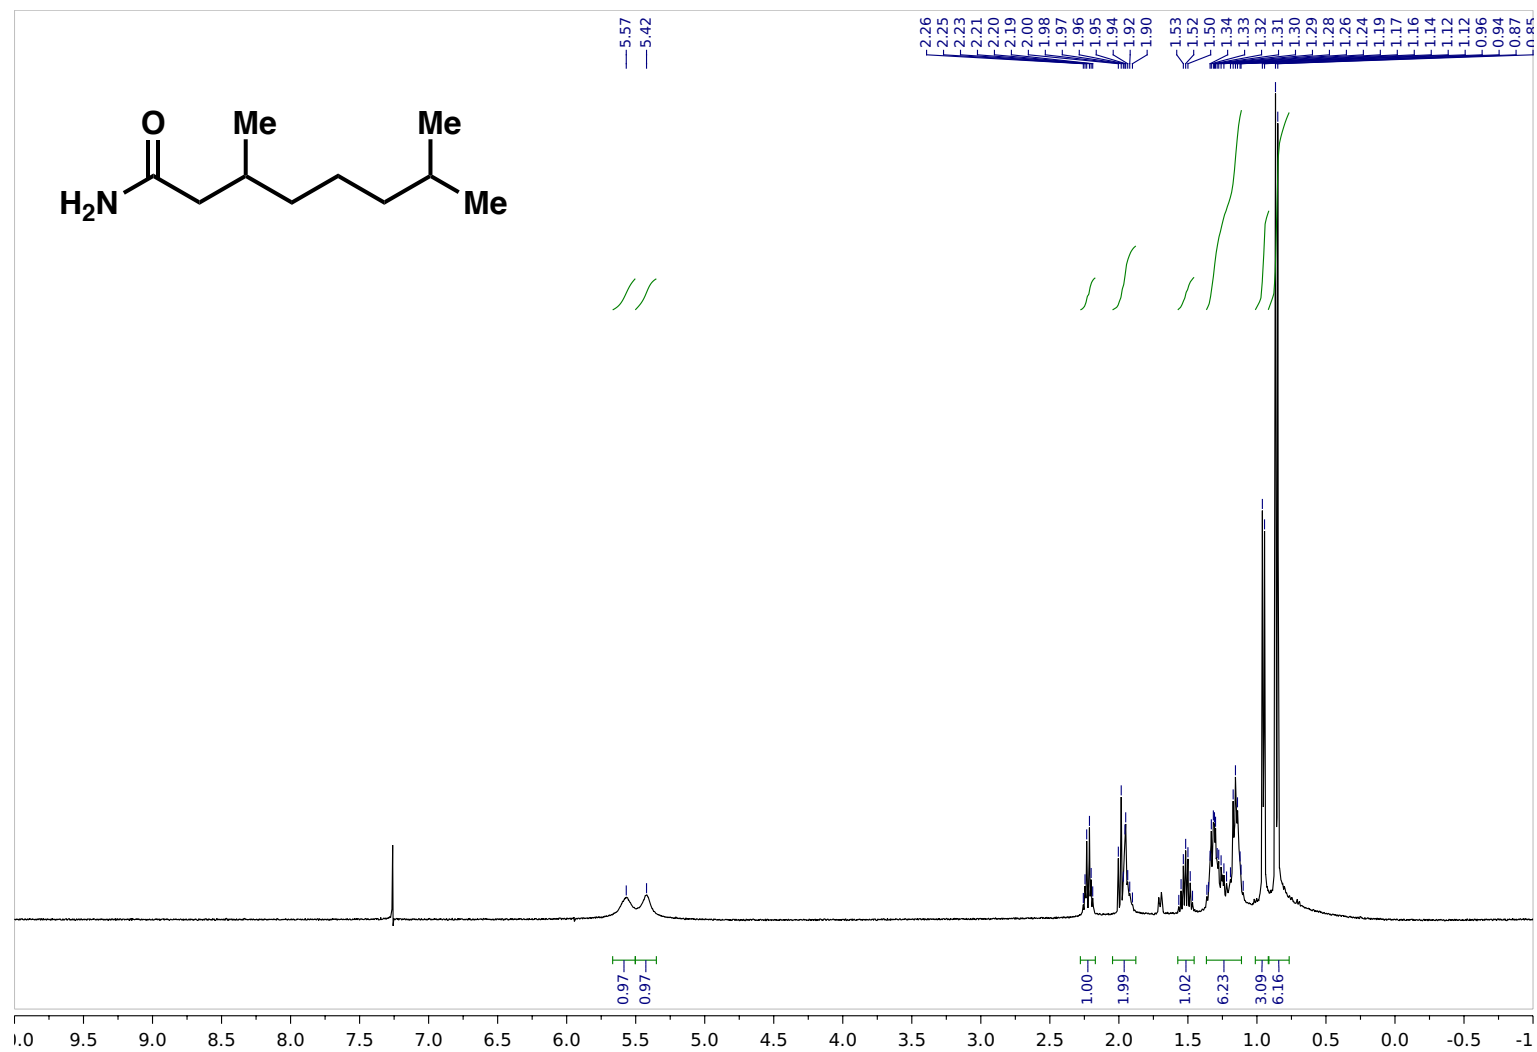

<sup>1</sup>H NMR (400 MHz, CDCl<sub>3</sub>) for 3,7-dimethyloctylamide (S3h)

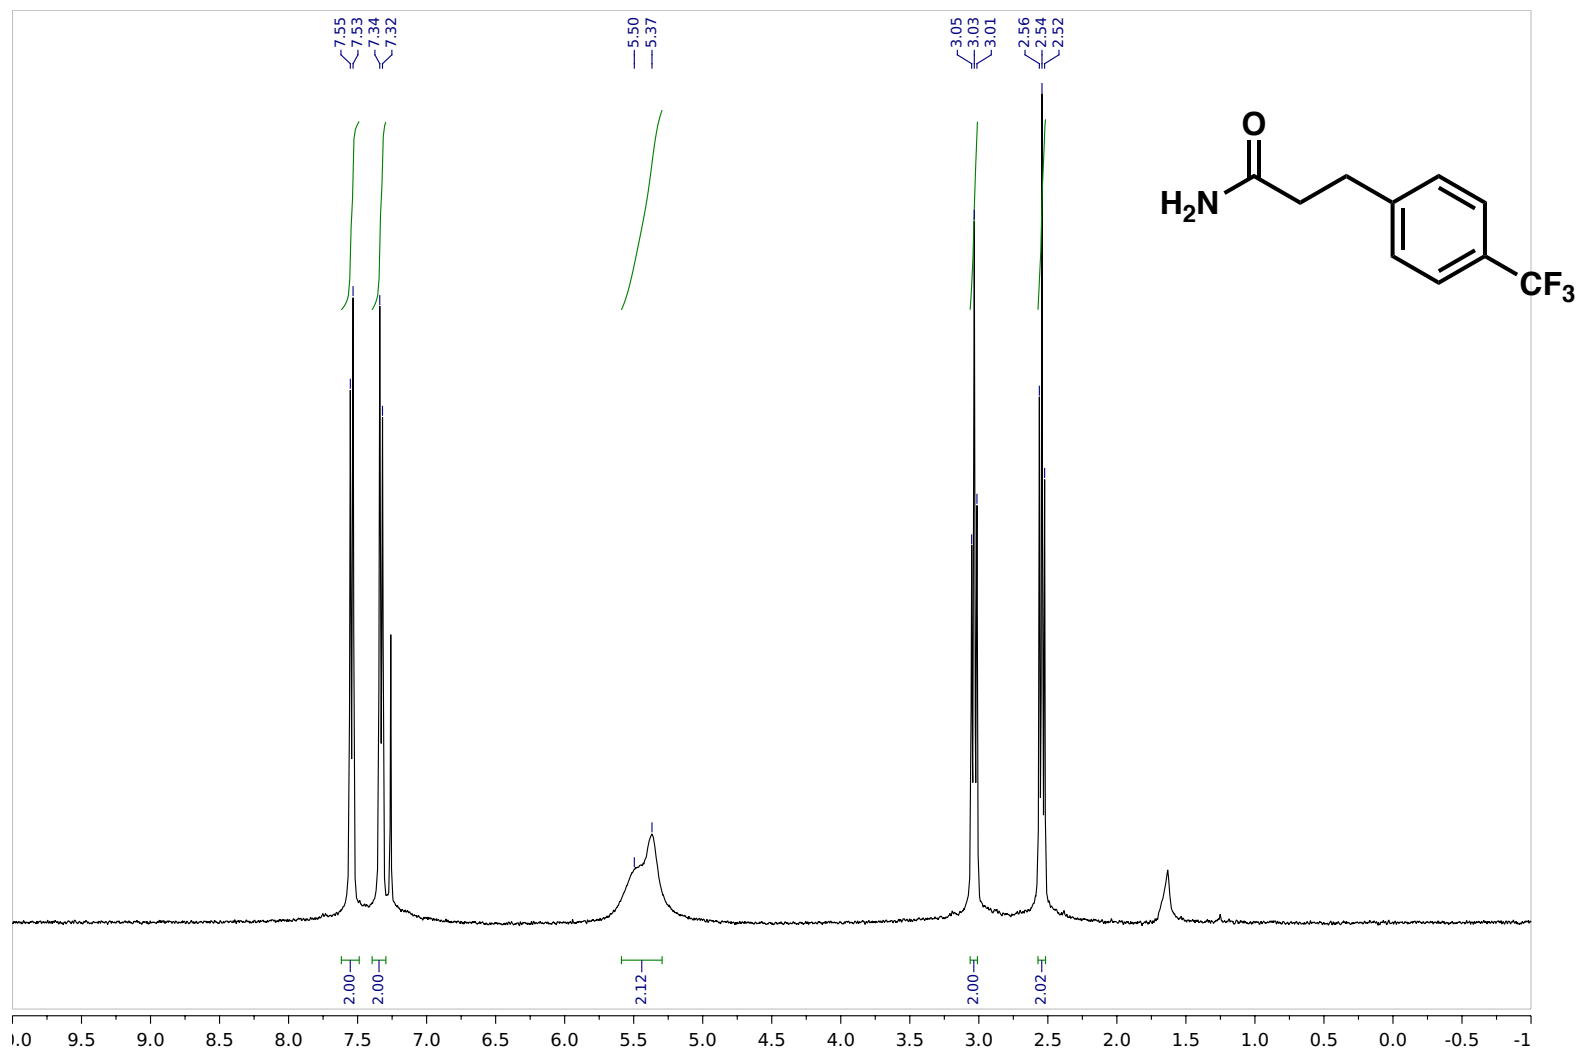

<sup>1</sup>H NMR (400 MHz, CDCl<sub>3</sub>) for 3-(4-(trifluoromethyl)phenyl)propamide (S3t)

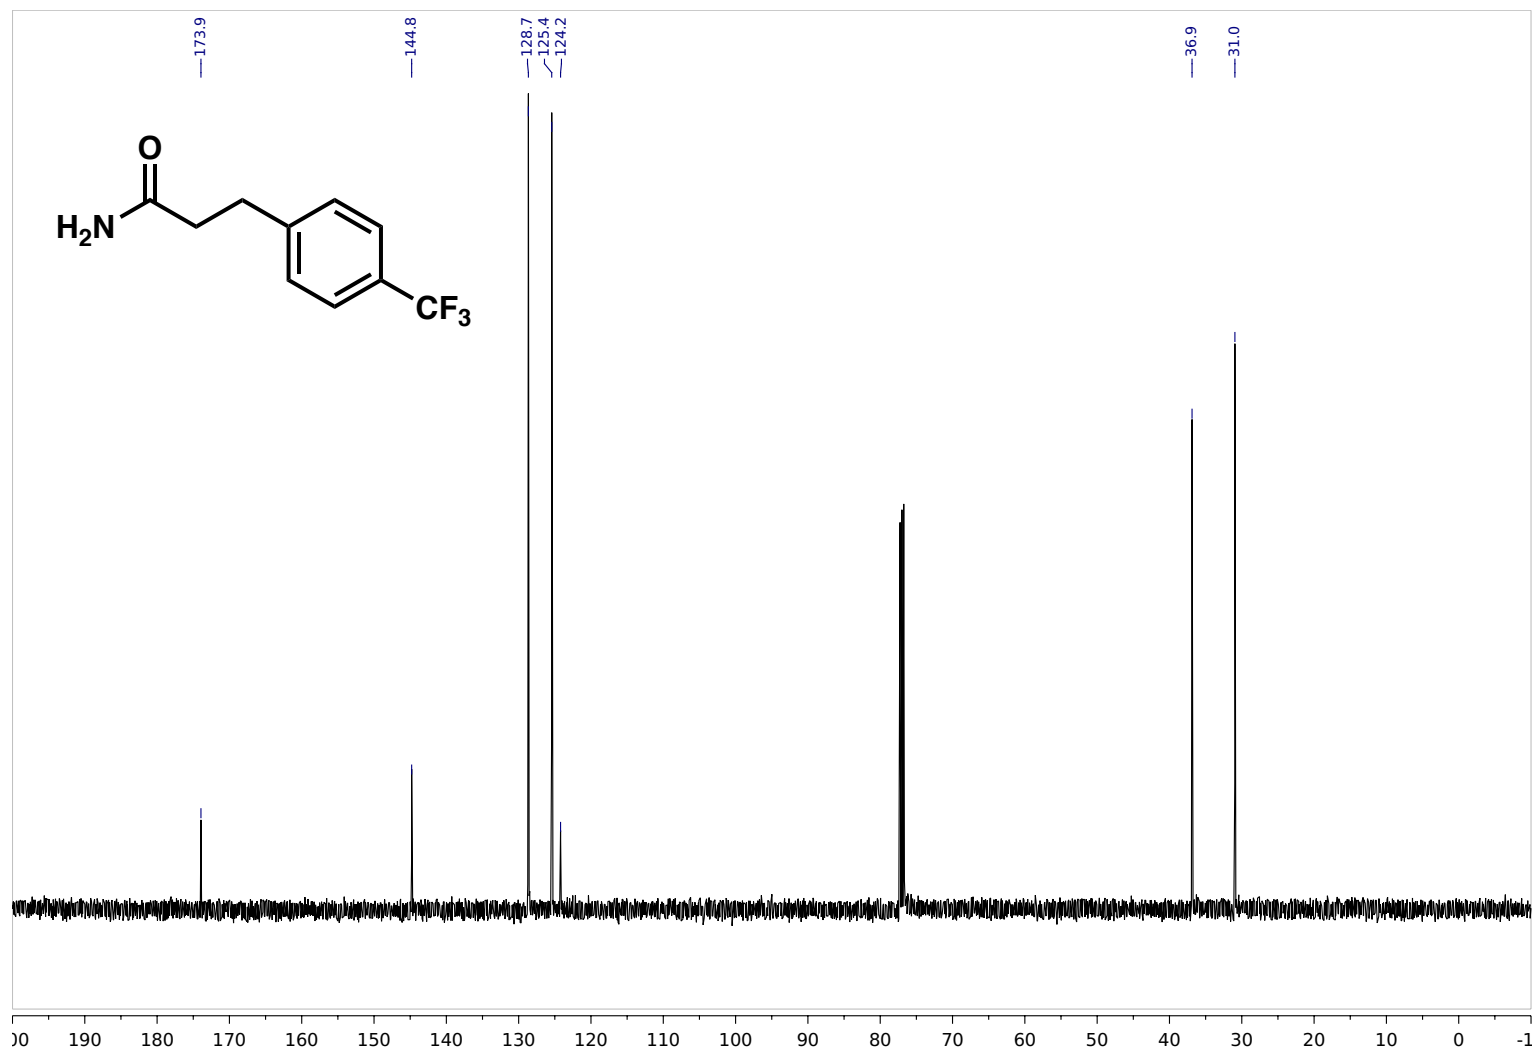

<sup>13</sup>C NMR (126 MHz, CDCl<sub>3</sub>, <sup>1</sup>H and <sup>19</sup>F decoupled) for 3-(4-(trifluoromethyl)phenyl)propamide (**S3t**)

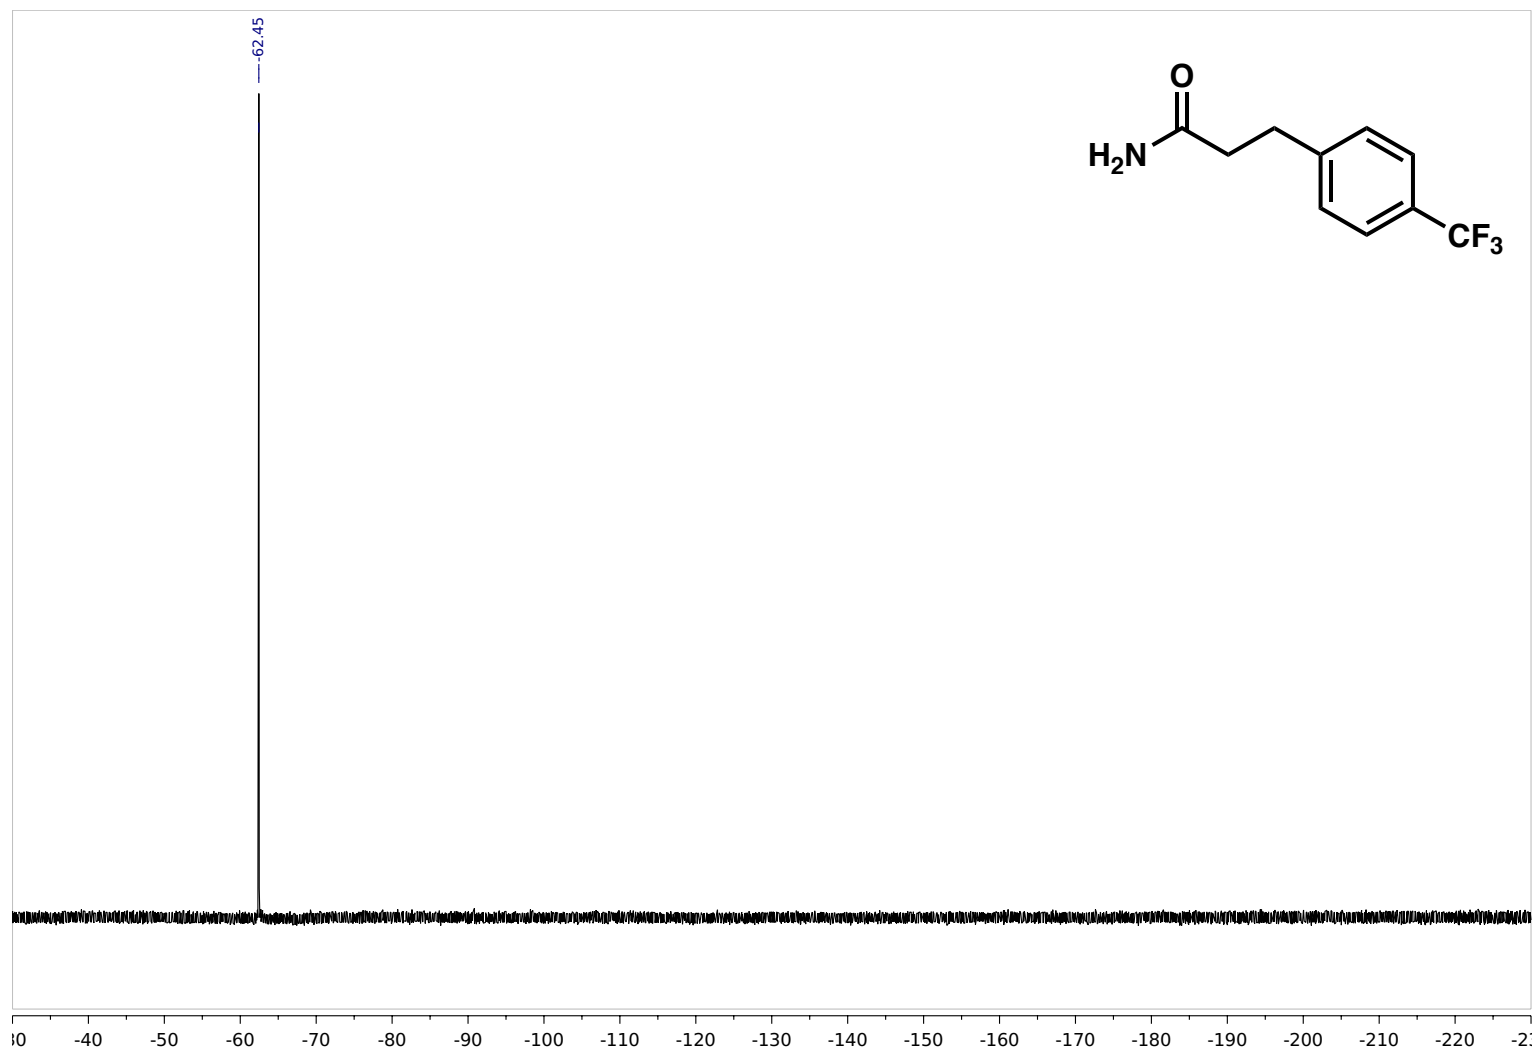

$^{19}\text{F}$  NMR (376 MHz,  $\text{CDCl}_3$ ) for 3-(4-(trifluoromethyl)phenyl)propamide (S3t)

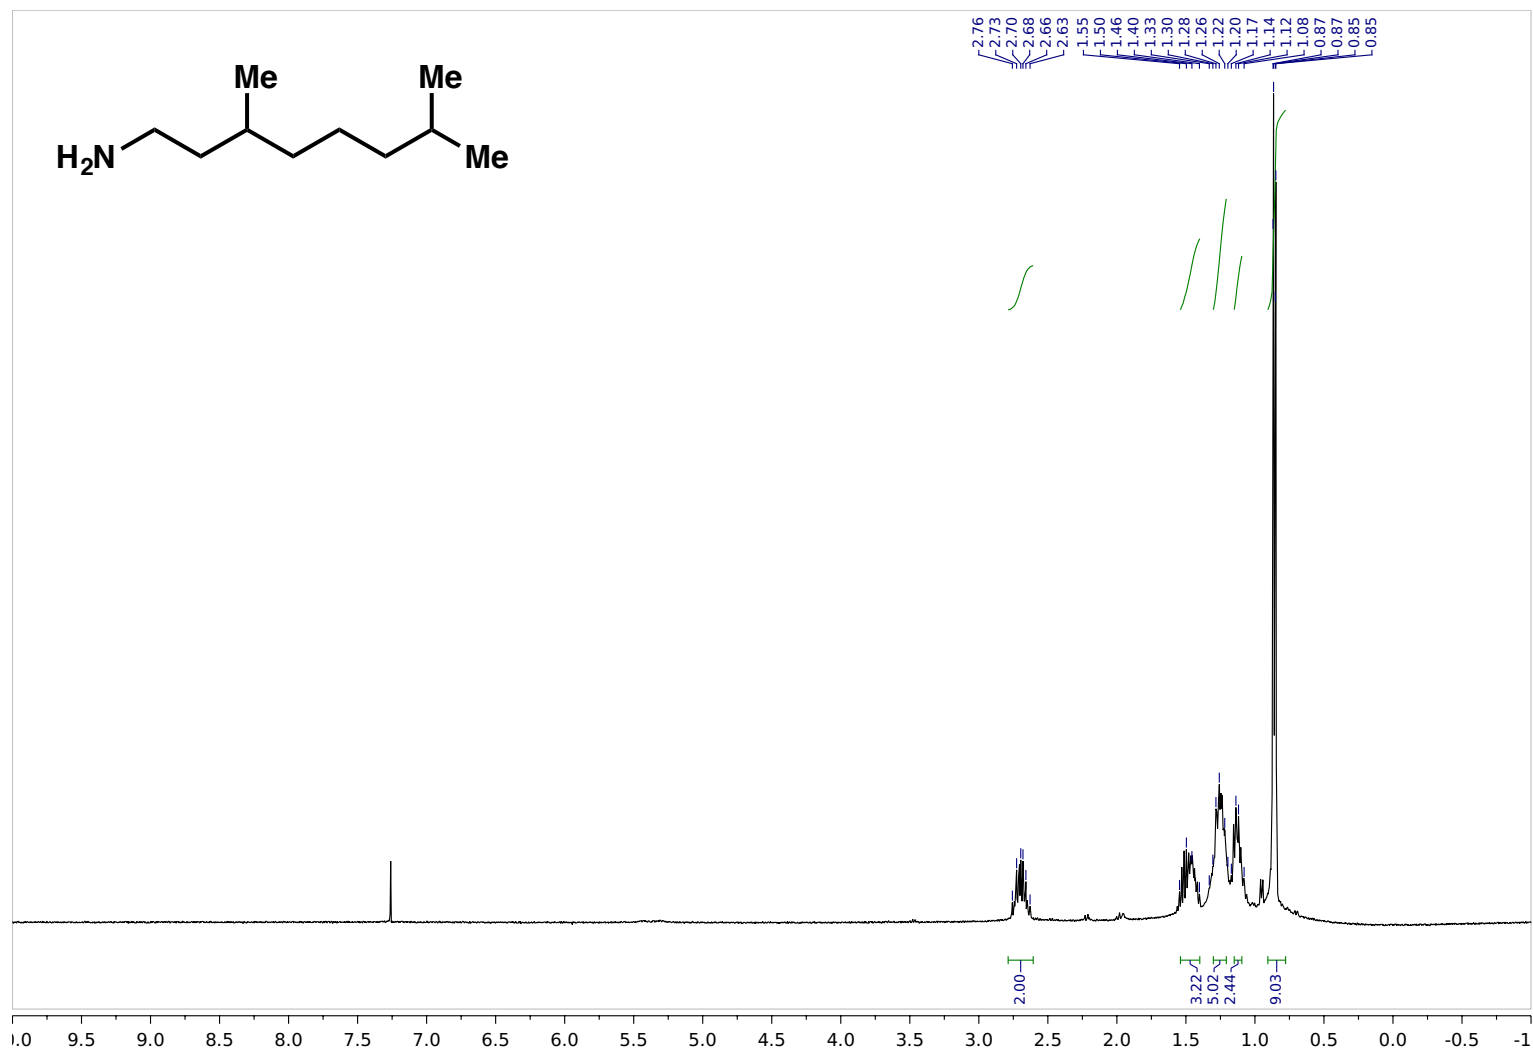

$^1\text{H}$  NMR (400 MHz,  $\text{CDCl}_3$ ) for 3,7-dimethyloctylamine (**S4h**)

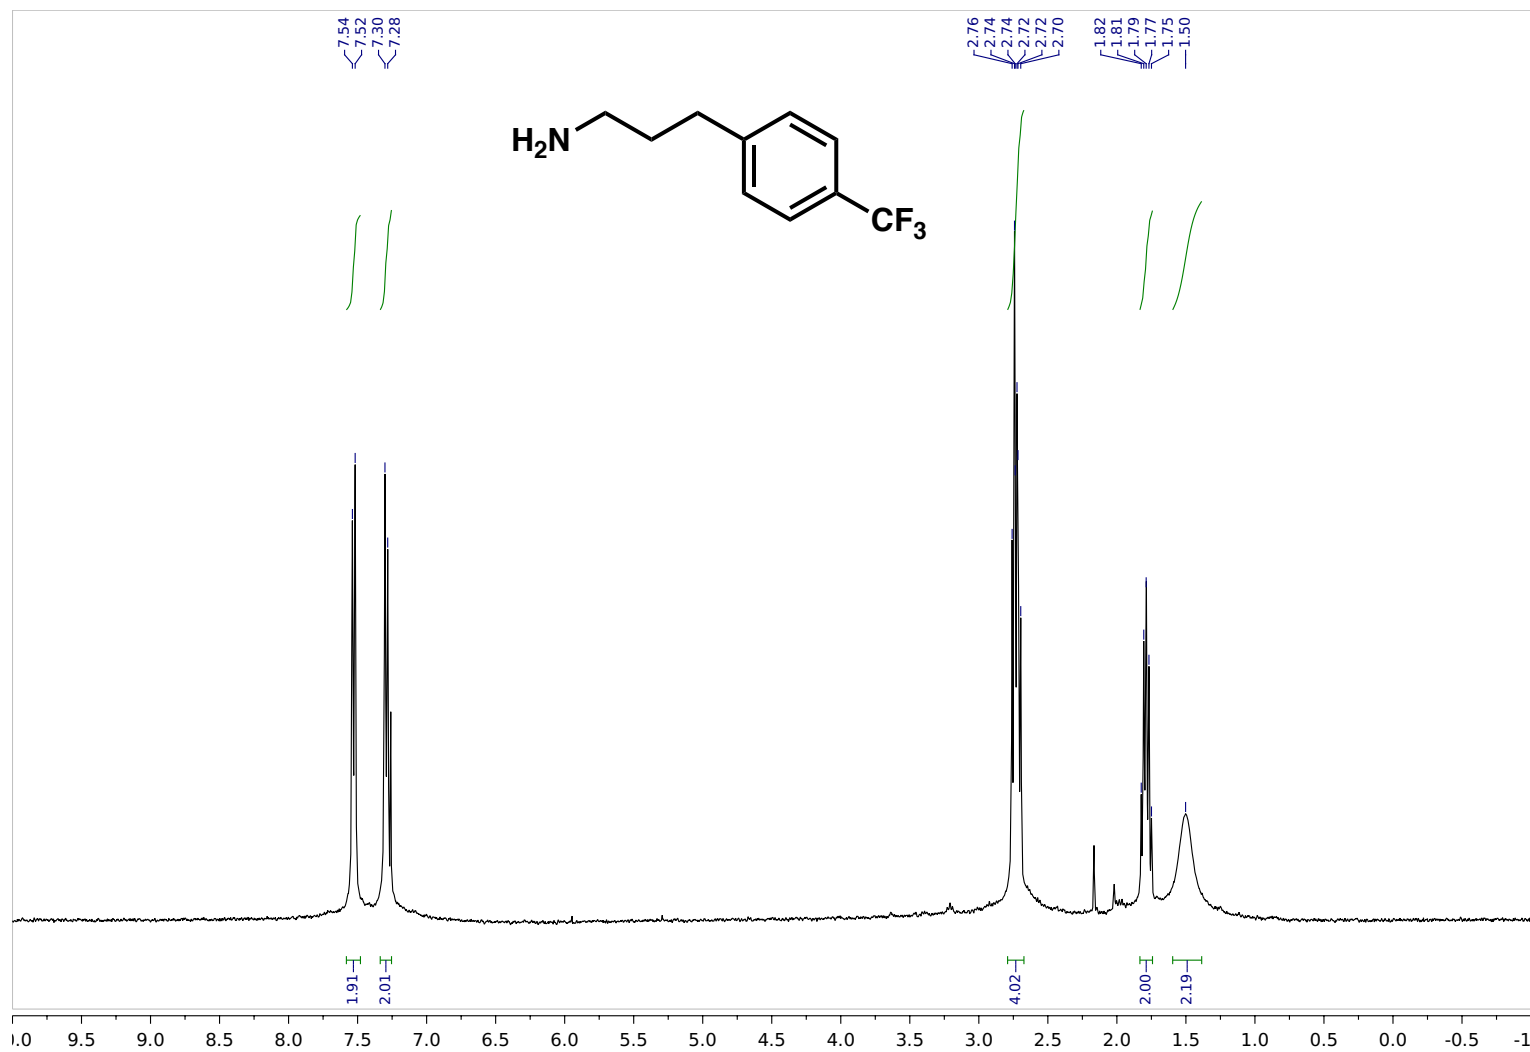

<sup>1</sup>H NMR (400 MHz, CDCl<sub>3</sub>) for 3-(4-(trifluoromethyl)phenyl)propylamine (S4t)

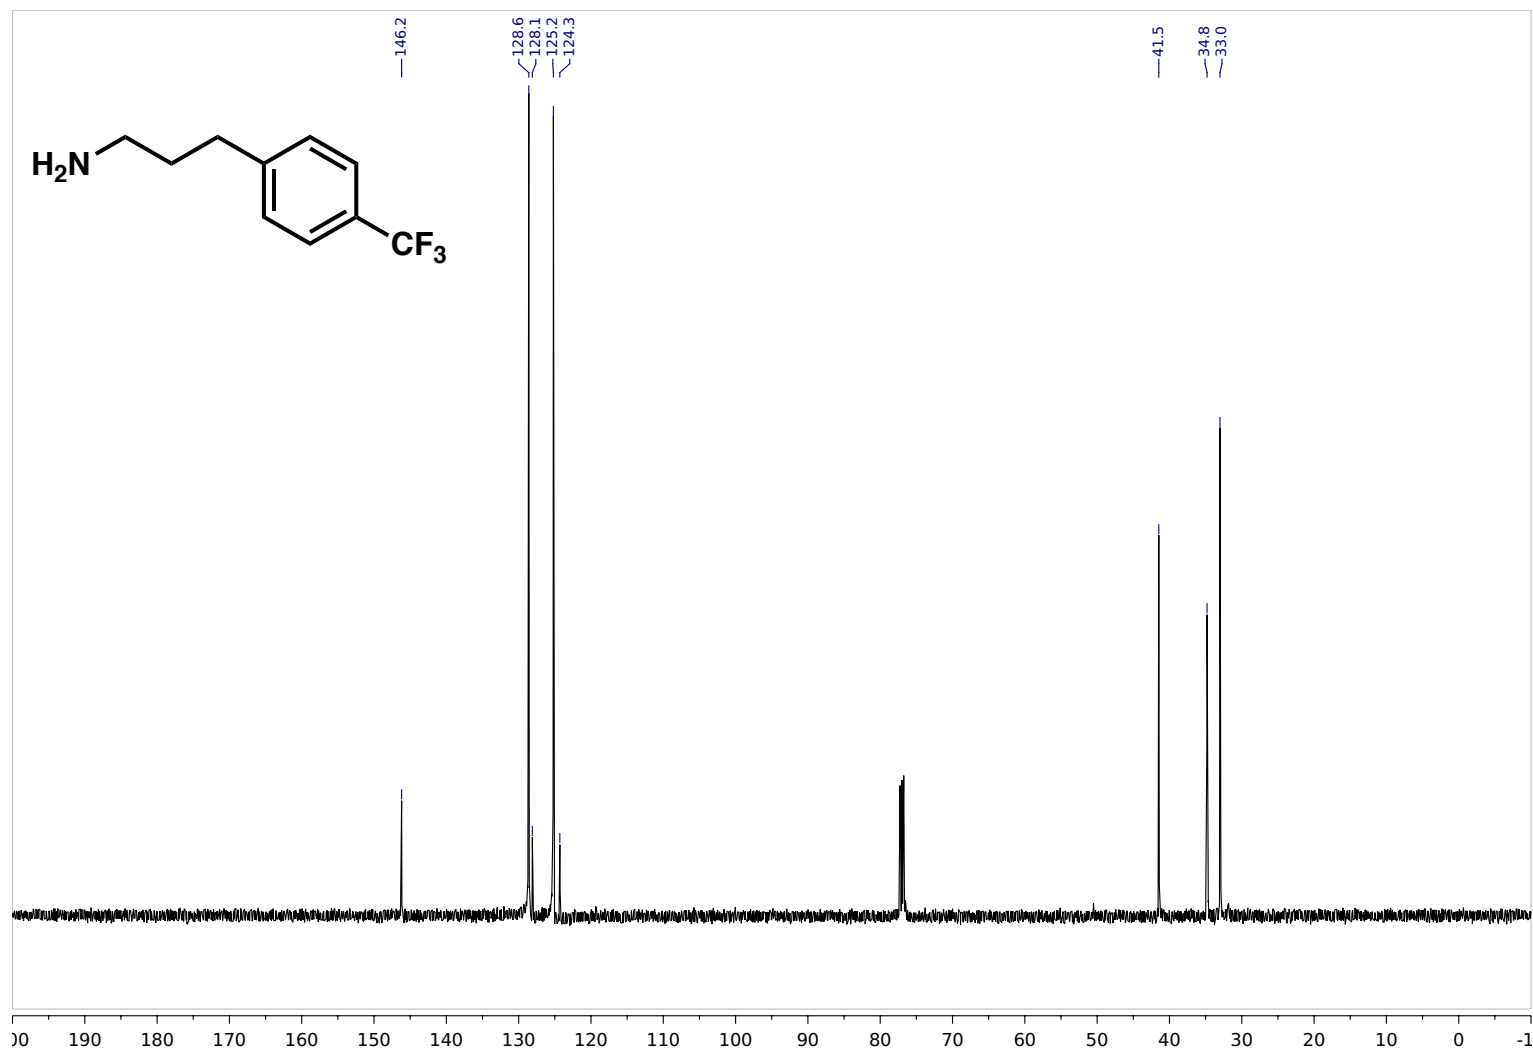

$^{13}\text{C}$  NMR (126 MHz,  $\text{CDCl}_3$ ,  $^1\text{H}$  and  $^{19}\text{F}$  decoupled) for 3-(4-(trifluoromethyl)phenyl)propylamine (S4t)



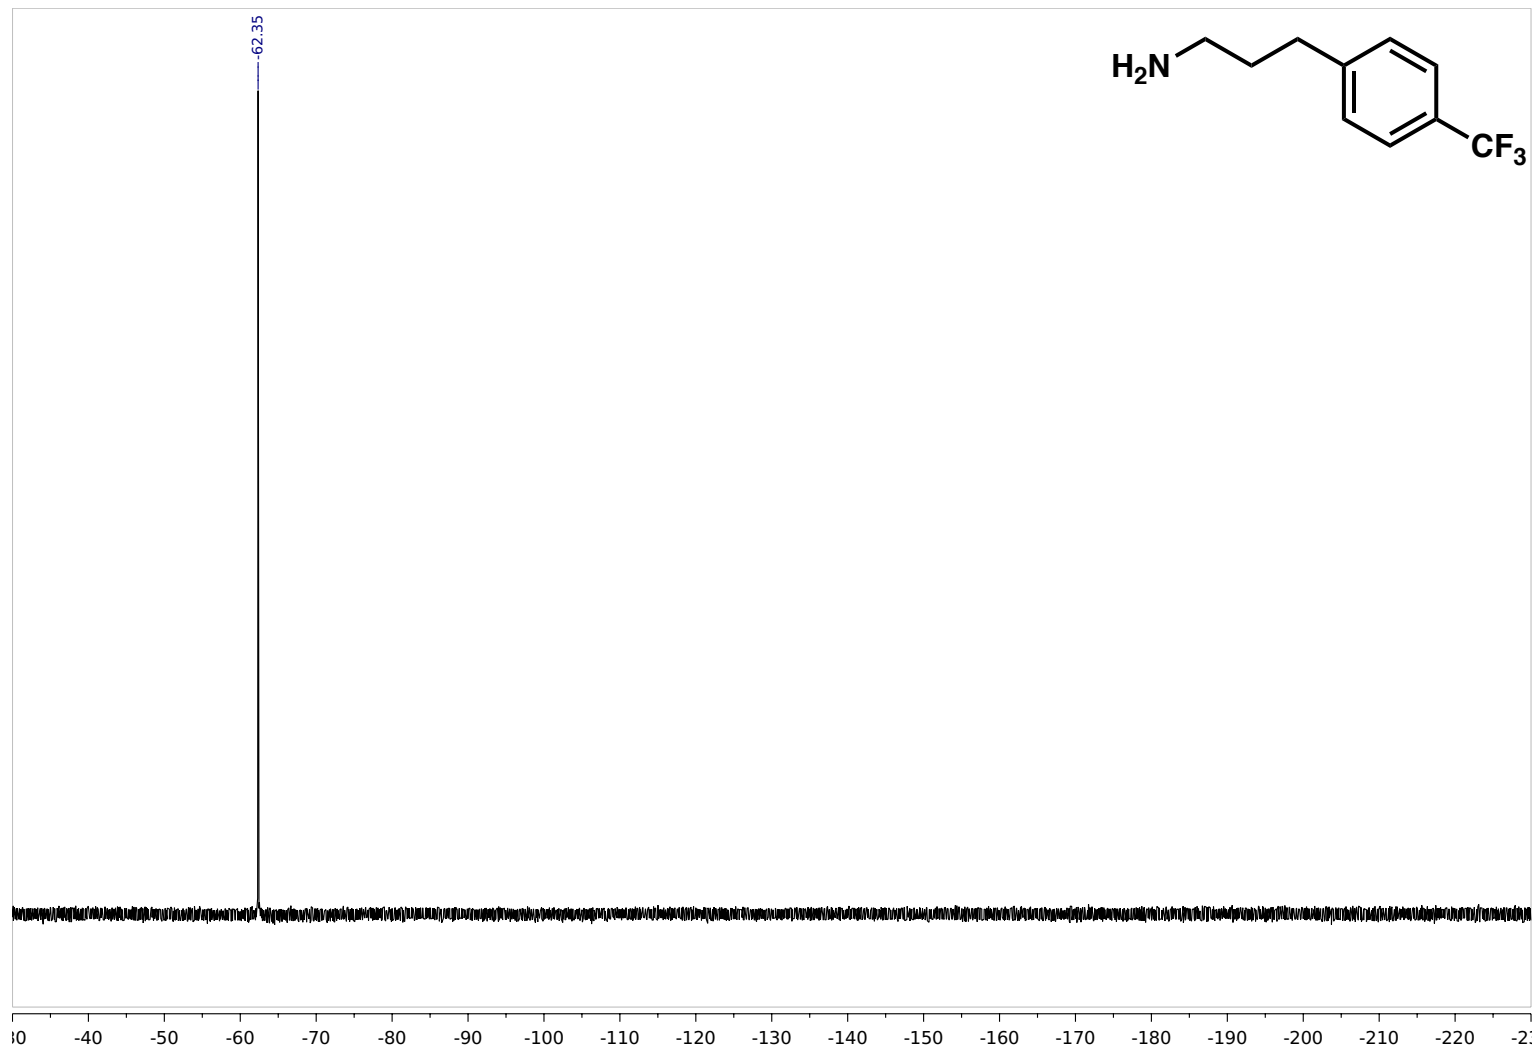

$^{19}\text{F}$  NMR (376 MHz,  $\text{CDCl}_3$ ) for 3-(4-(trifluoromethyl)phenyl)propylamine (S4t)

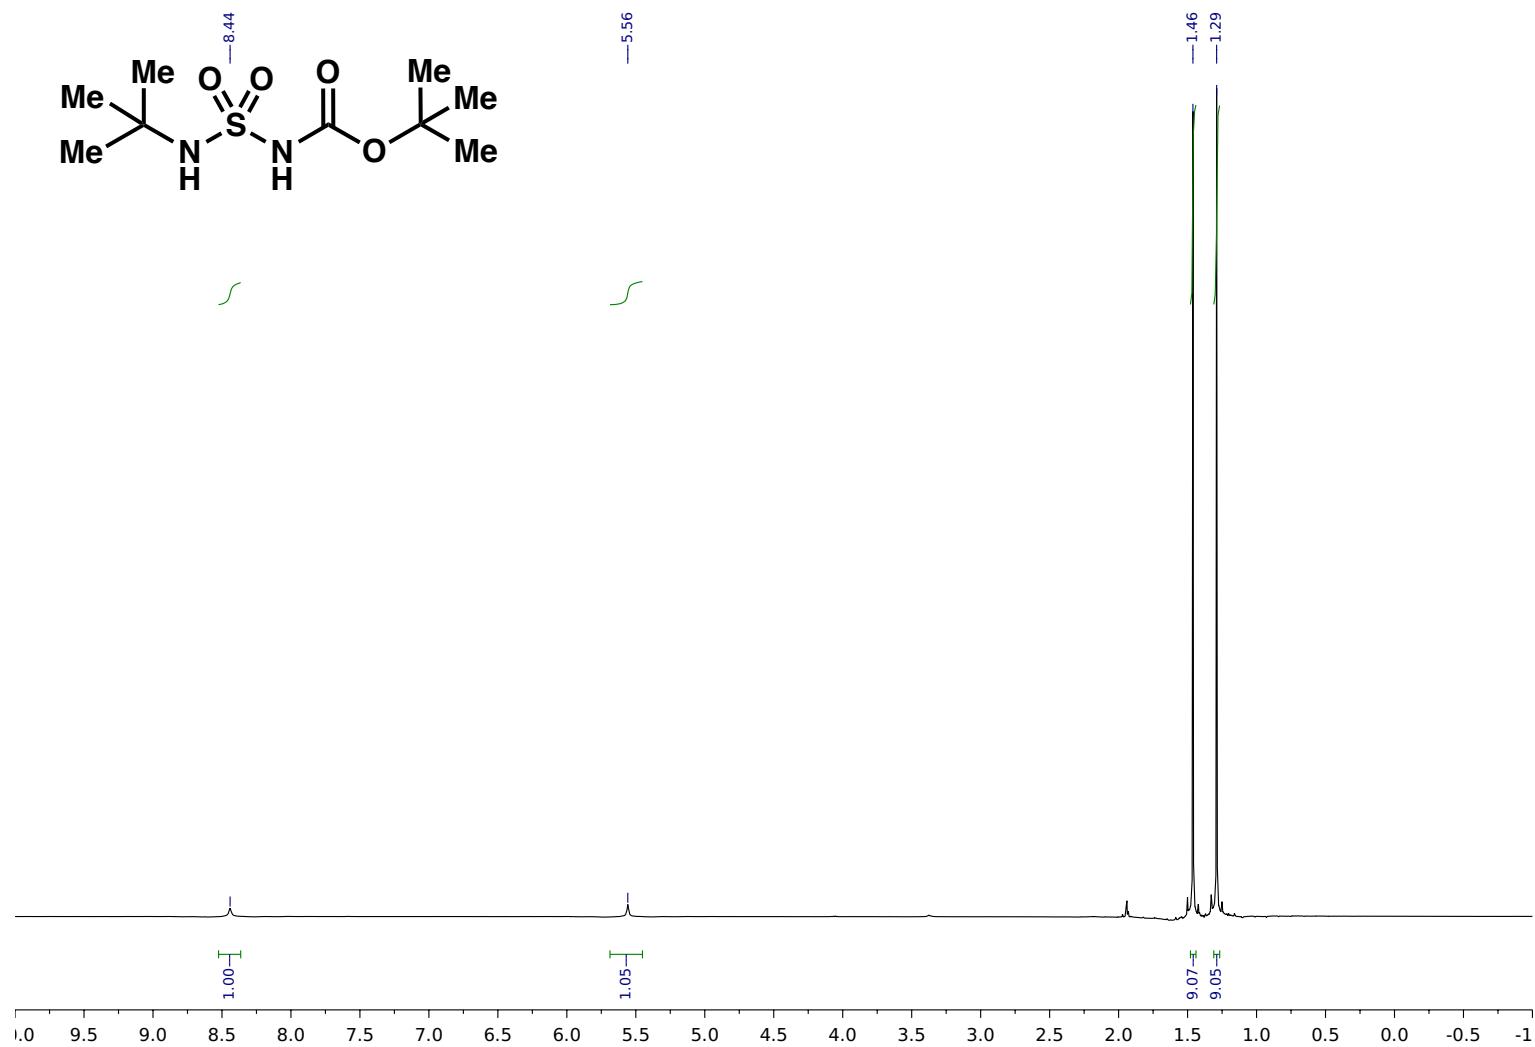

<sup>1</sup>H NMR (400 MHz, CD<sub>3</sub>CN) for *N*-*tert*-butoxycarbonyl-*N'*-*tert*-butylsulfamide (S5a)

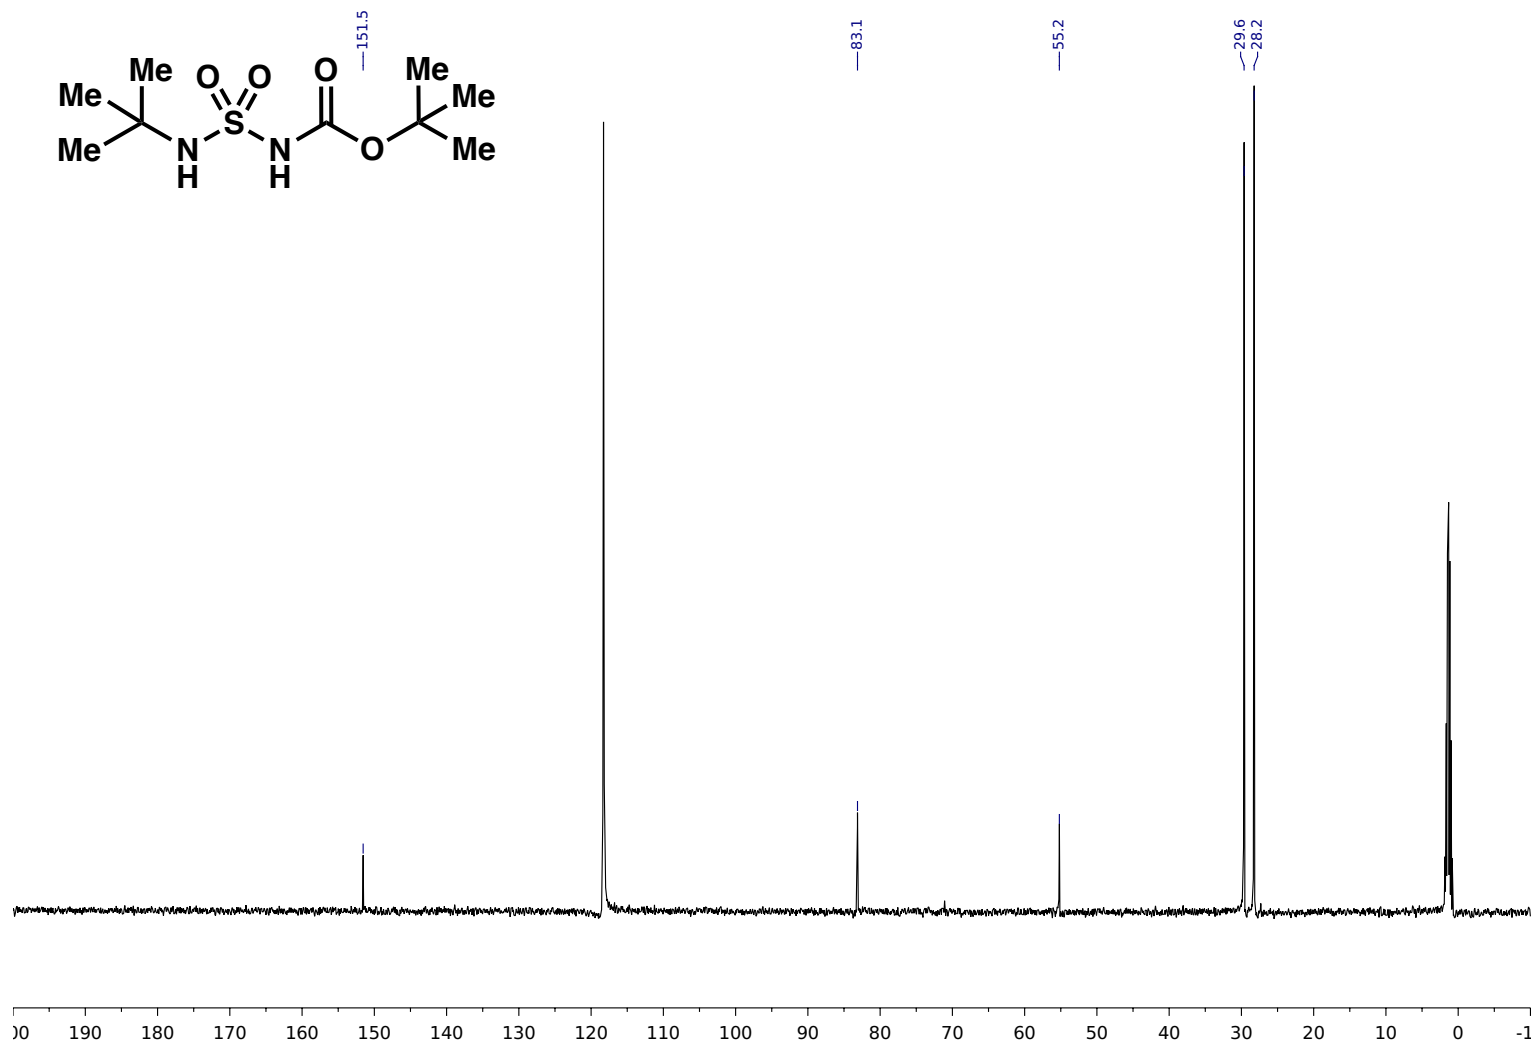

<sup>13</sup>C NMR (126 MHz, CD<sub>3</sub>CN) for *N*-*tert*-butoxycarbonyl-*N'*-*tert*-butylsulfamide (S5a)

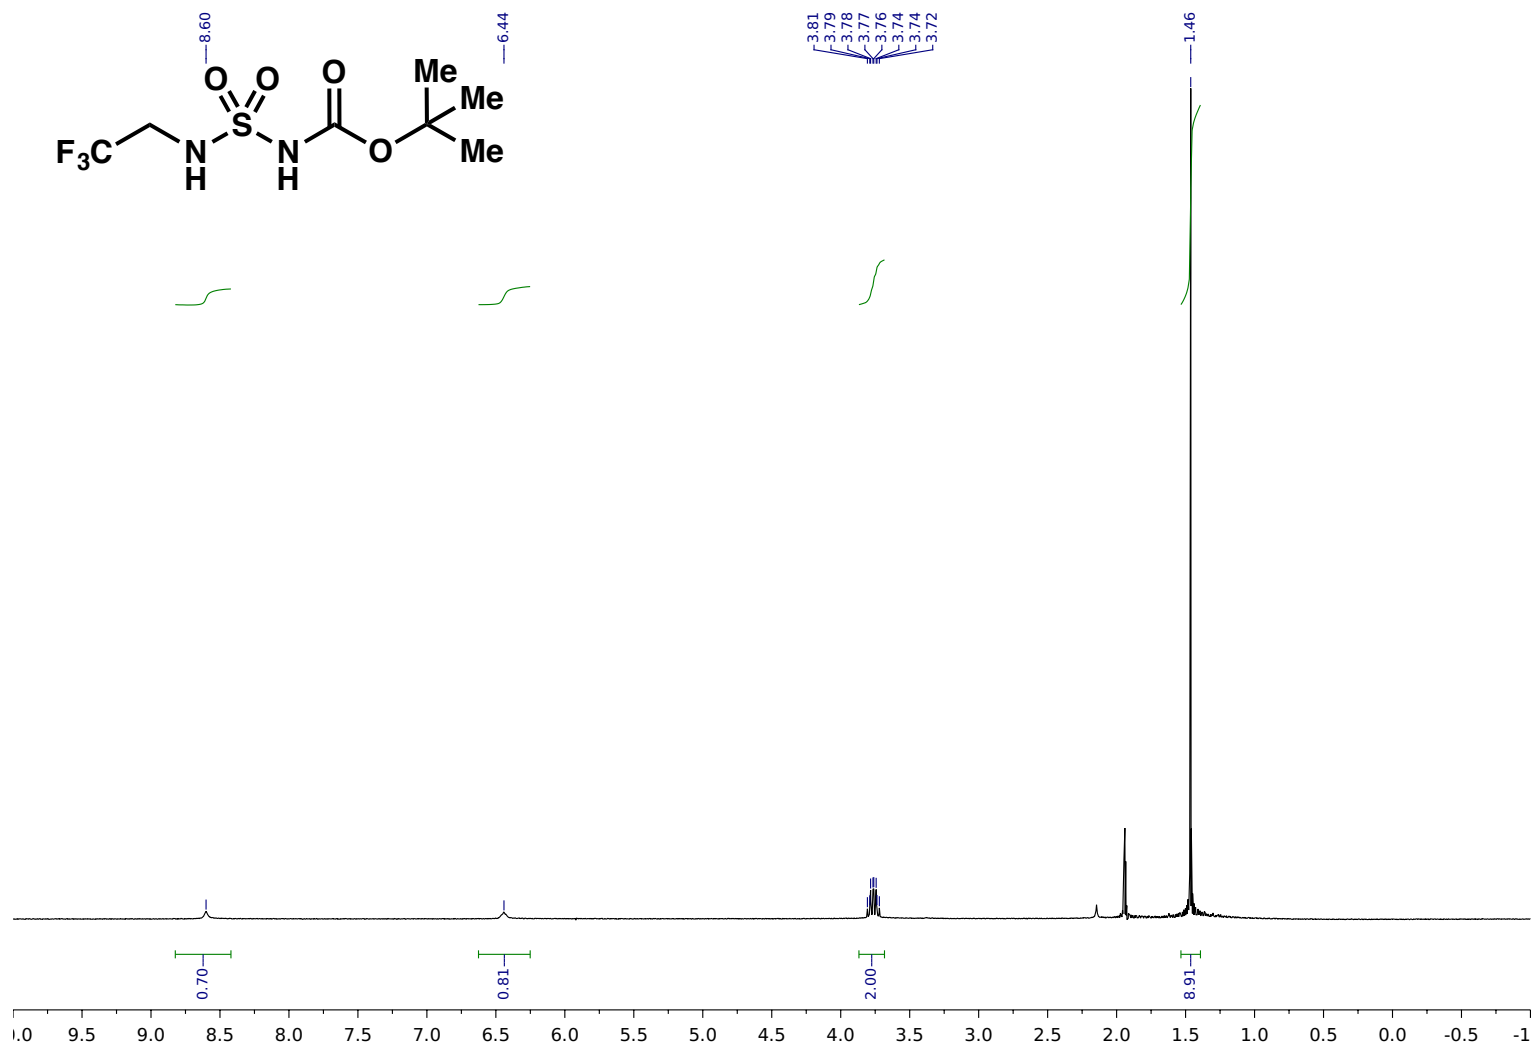

<sup>1</sup>H NMR (400 MHz, CD<sub>3</sub>CN) for *N*-*tert*-butoxycarbonyl-*N'*-(2,2,2-trifluoroethyl)sulfamide (**S5b**)

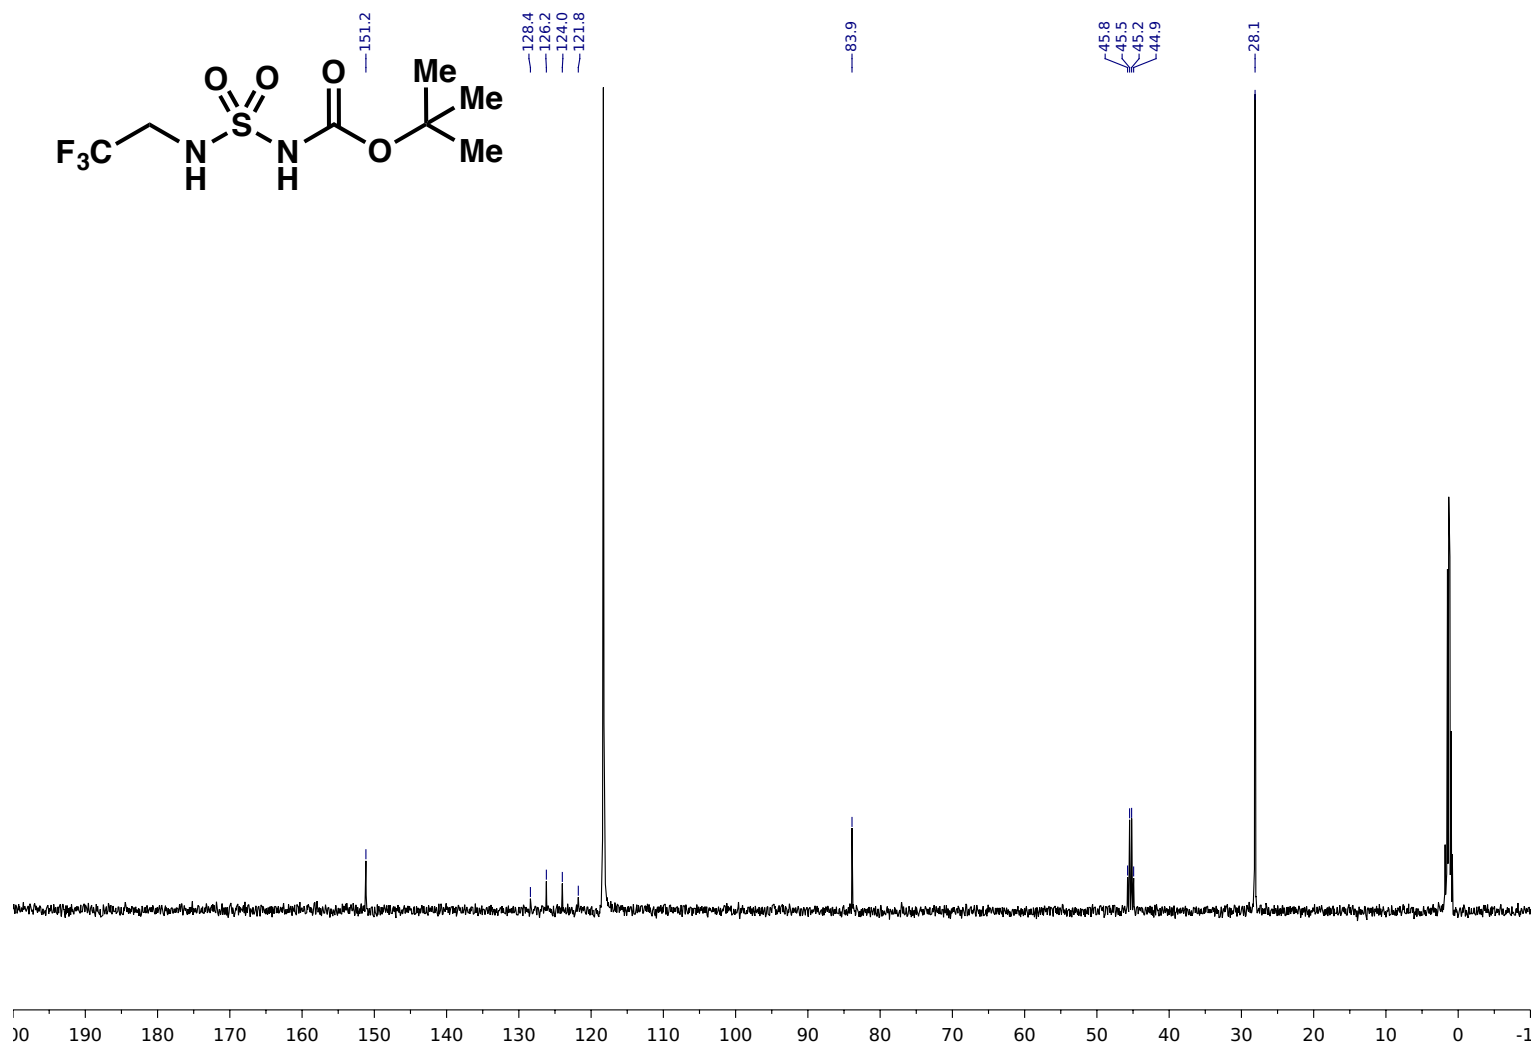

<sup>13</sup>C NMR (126 MHz, CD<sub>3</sub>CN) for *N*-*tert*-butoxycarbonyl-*N'*-(2,2,2-trifluoroethyl)sulfamide (S5b)

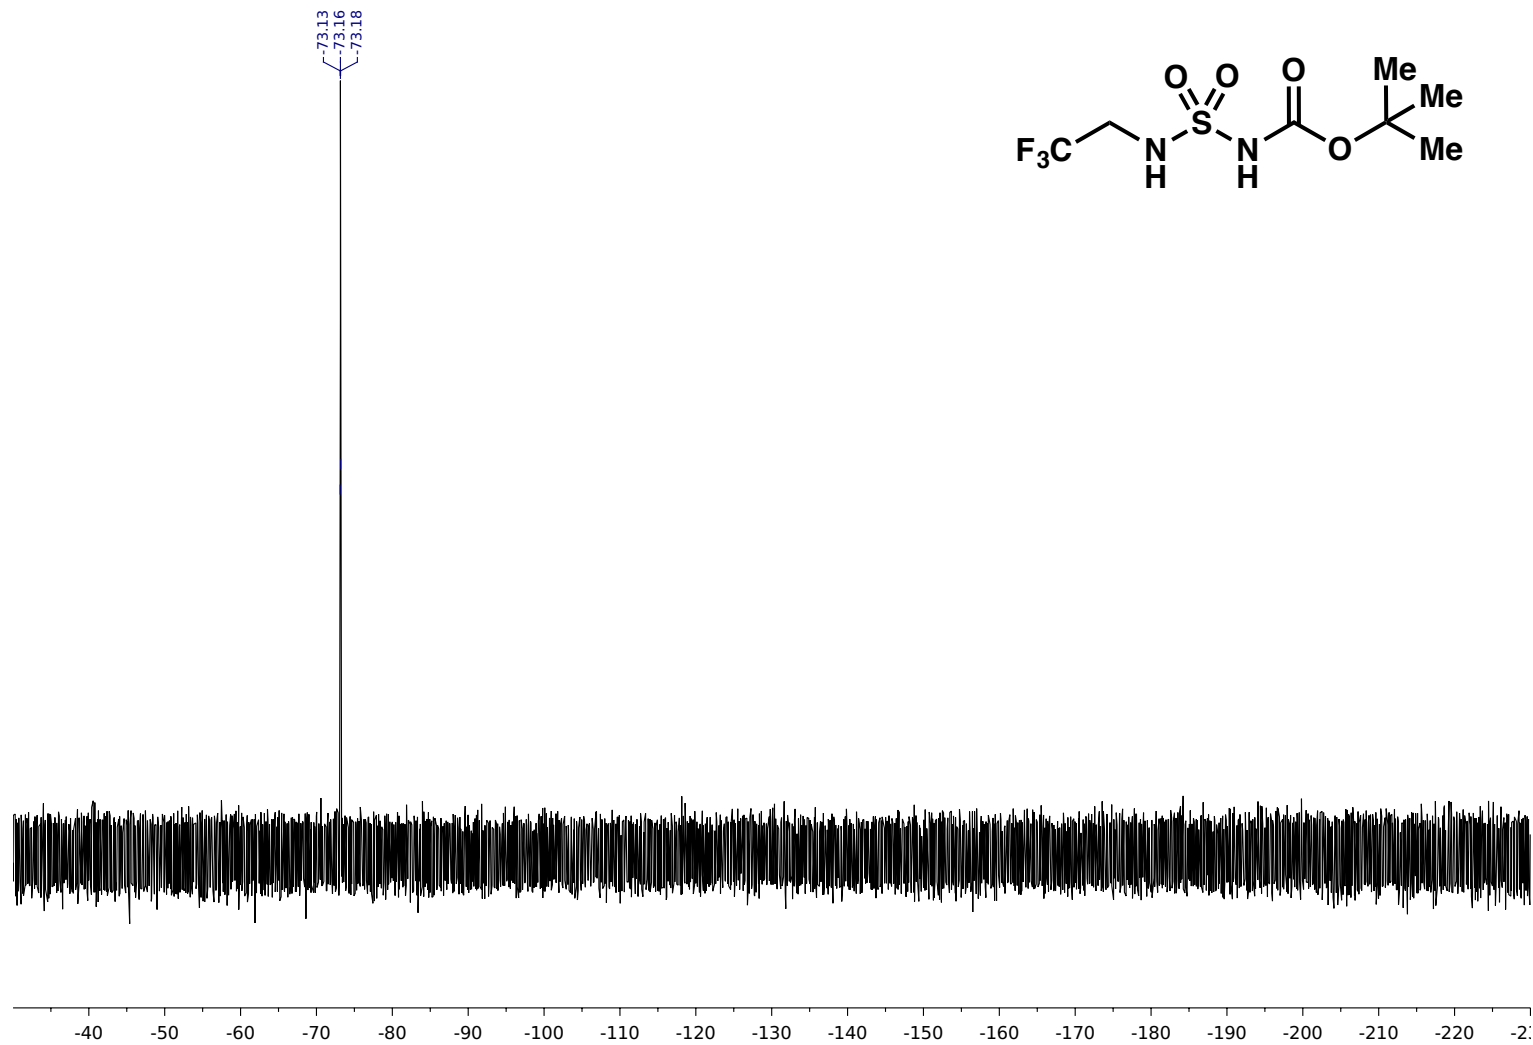

$^{19}\text{F}$  NMR (376 MHz,  $\text{CD}_3\text{CN}$ ) for *N*-*tert*-butoxycarbonyl-*N'*-(2,2,2-trifluoroethyl)sulfamide (**S5b**)

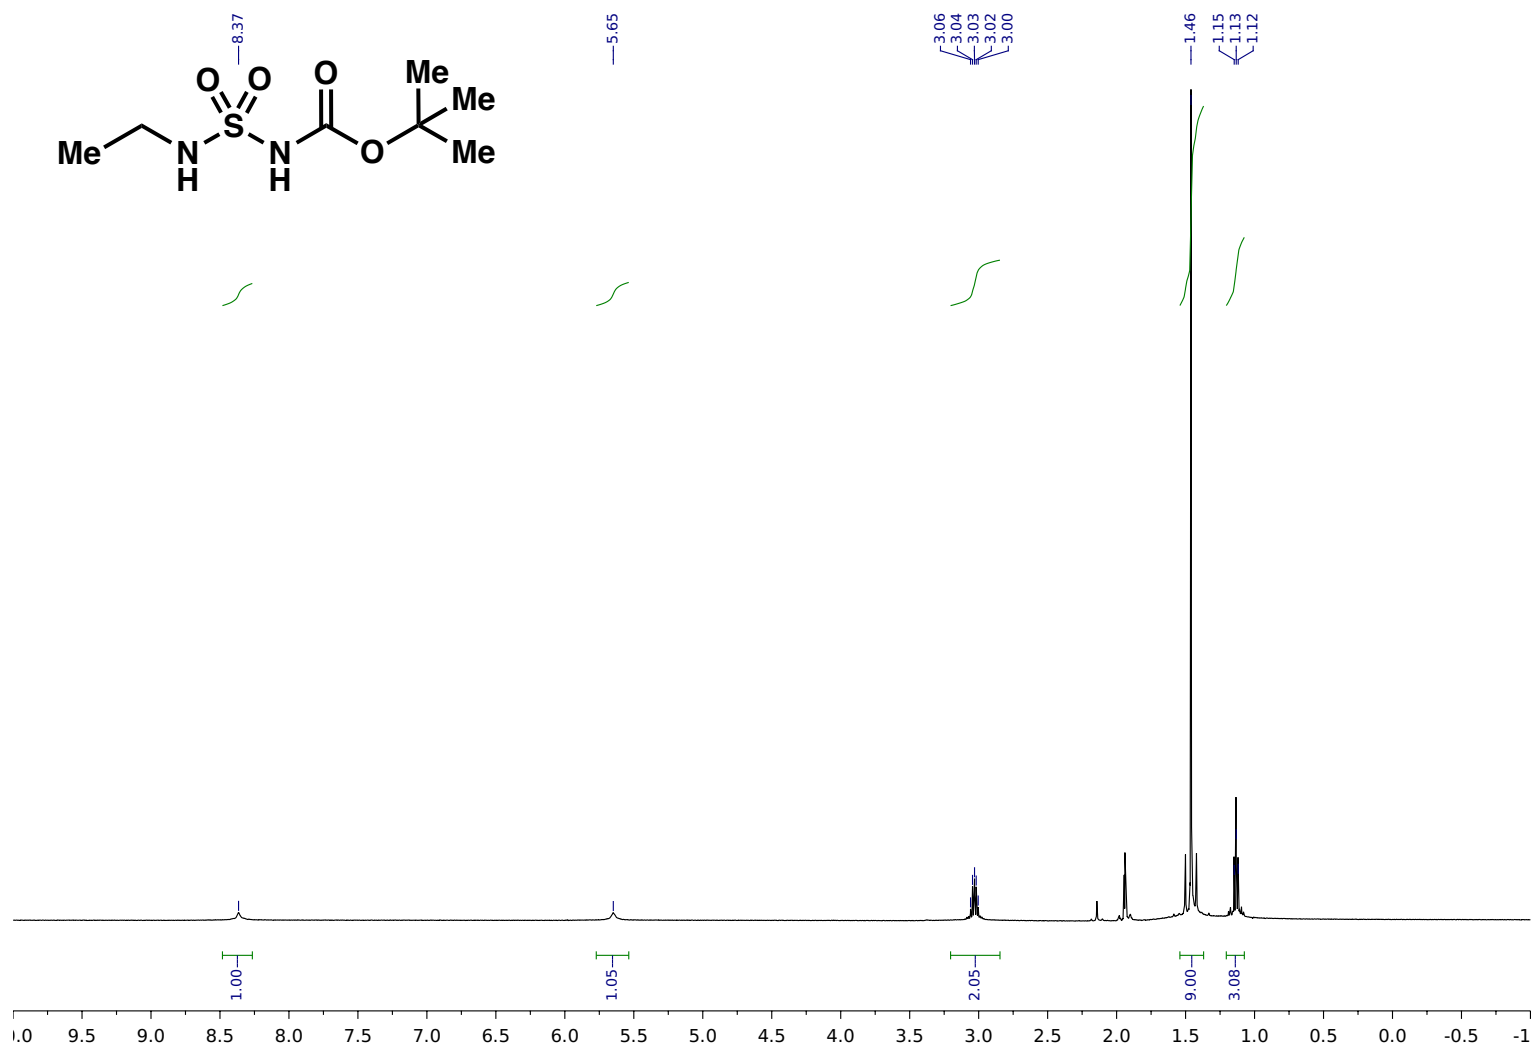

<sup>1</sup>H NMR (500 MHz, CD<sub>3</sub>CN) for *N*-*tert*-butoxycarbonyl-*N'*-ethylsulfamide (**S5c**)

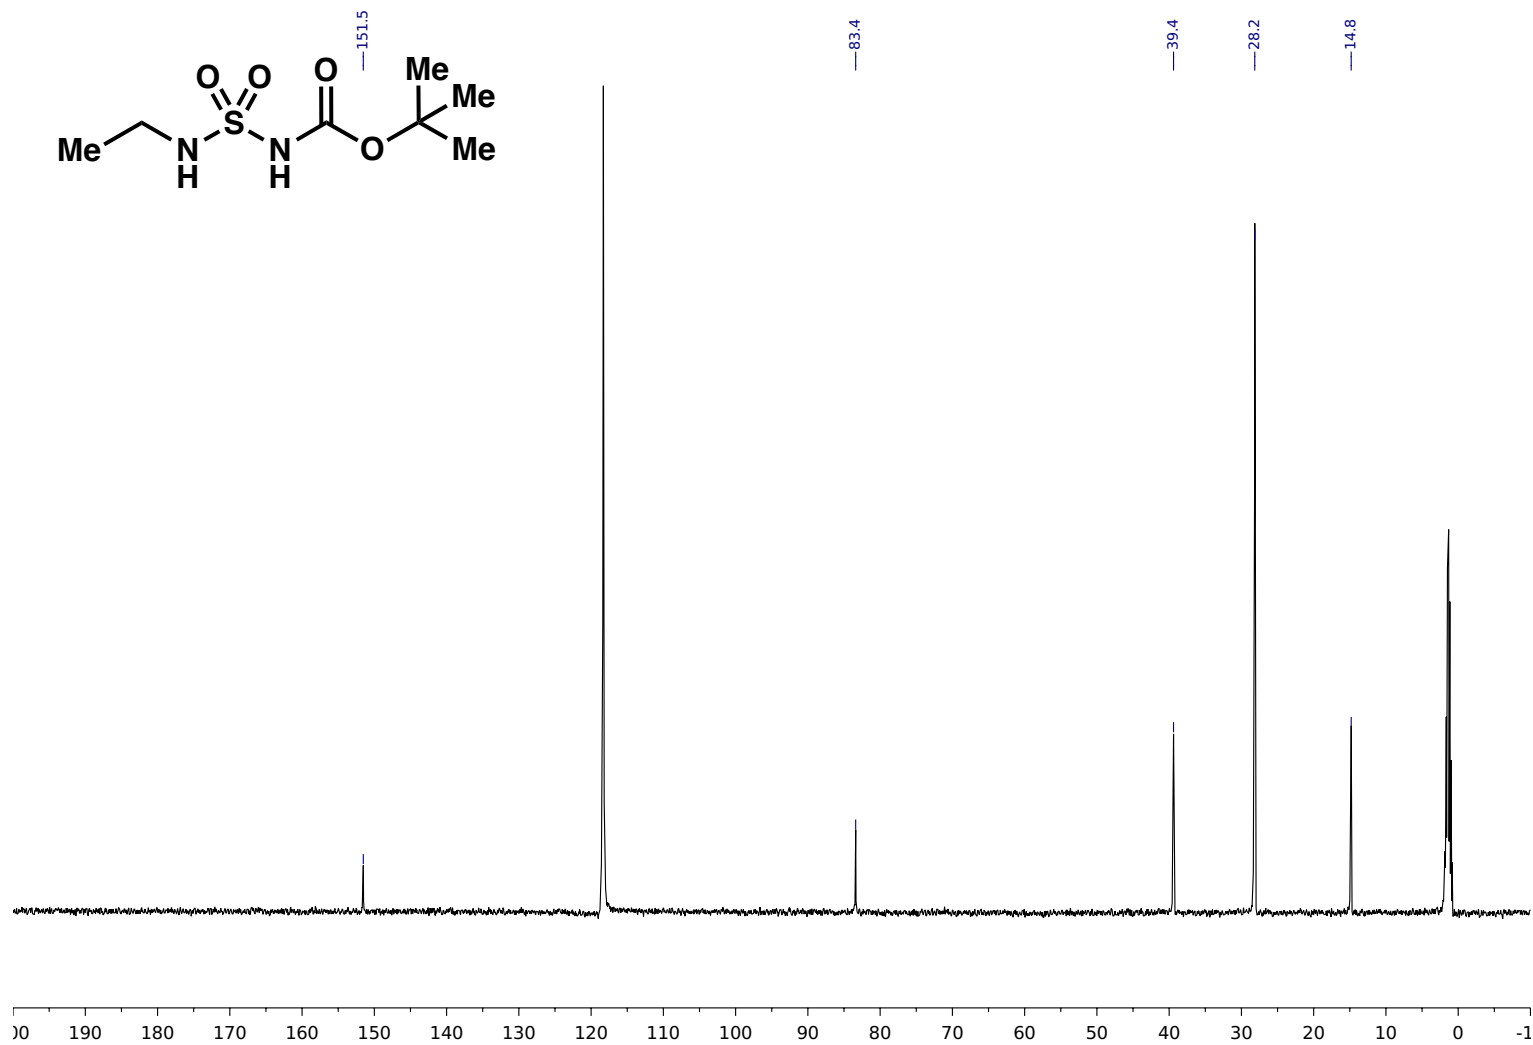

<sup>13</sup>C NMR (126 MHz, CD<sub>3</sub>CN) for *N*-*tert*-butoxycarbonyl-*N'*-ethylsulfamide (S5c)



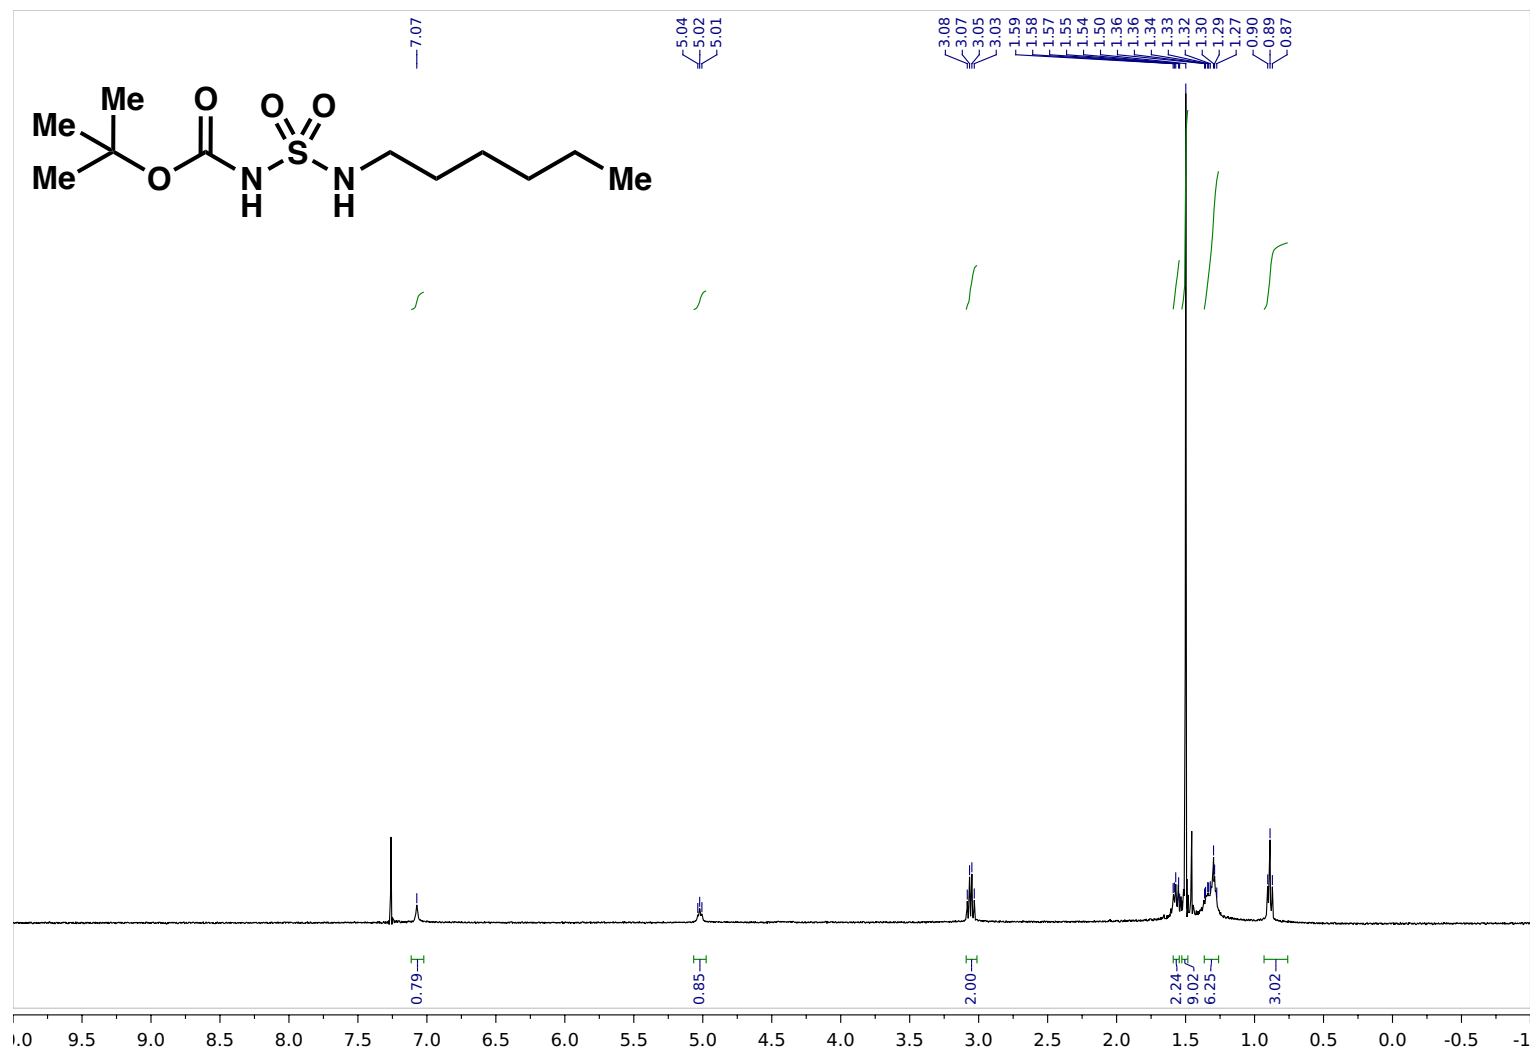

<sup>1</sup>H NMR (400 MHz, CDCl<sub>3</sub>) for *N*-*tert*-butoxycarbonyl-*N'*-hexyl sulfamide (S5d)

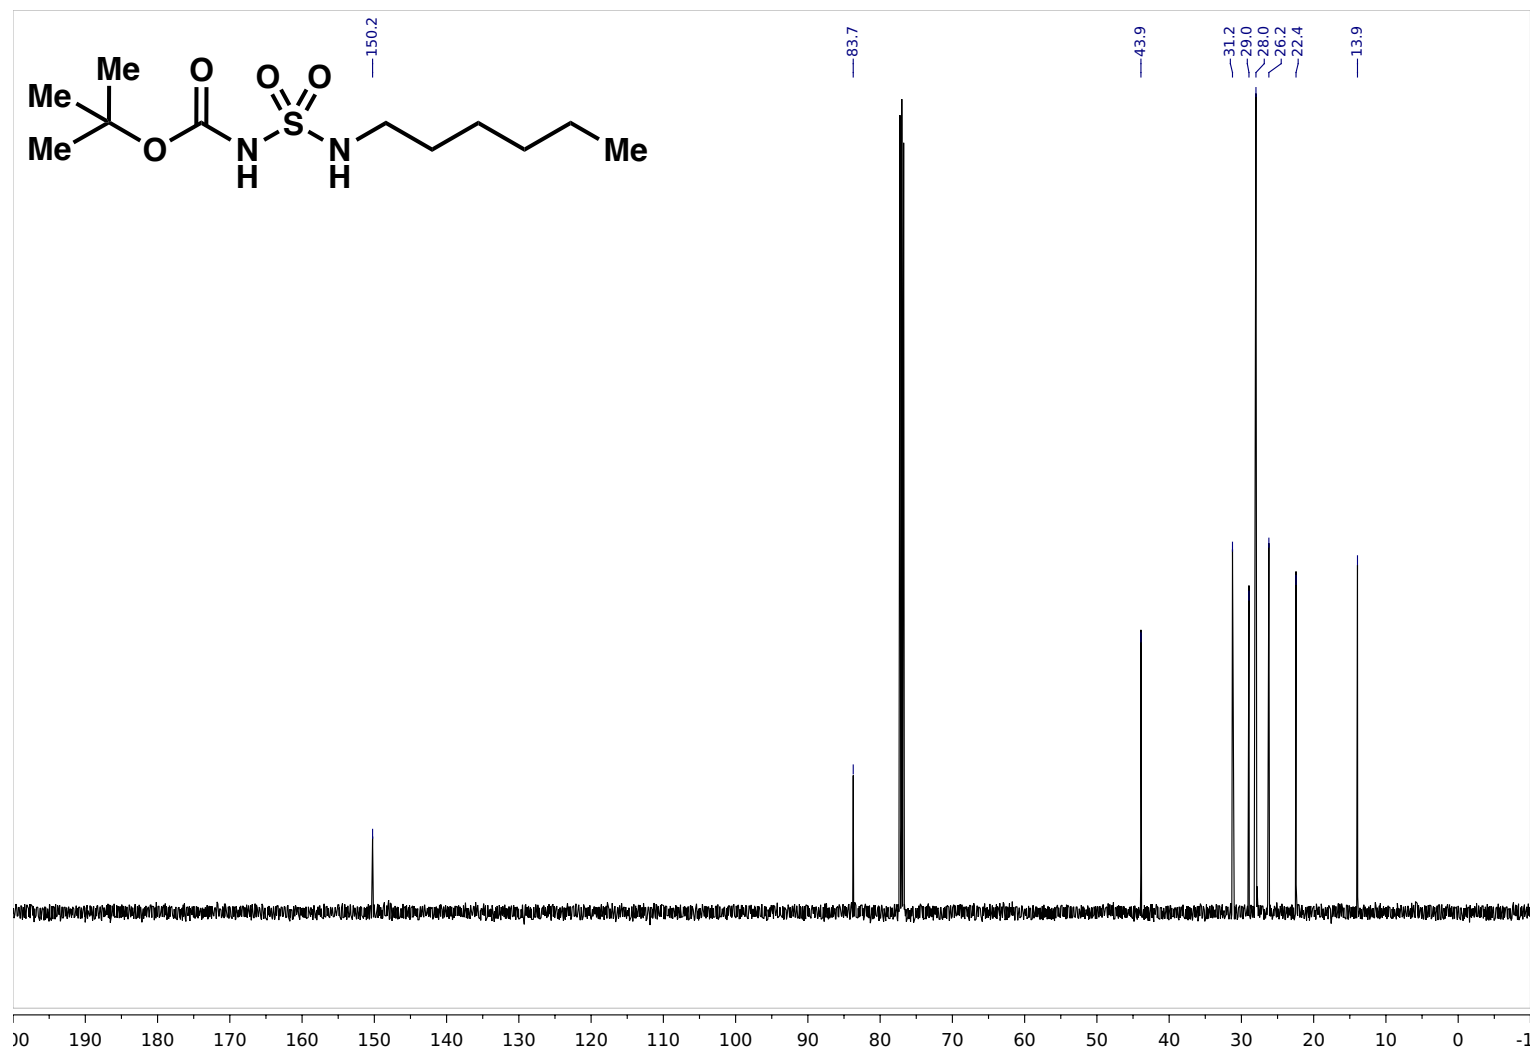

<sup>13</sup>C NMR (126 MHz, CDCl<sub>3</sub>) for *N*-*tert*-butoxycarbonyl-*N'*-hexyl sulfamide (S5d)

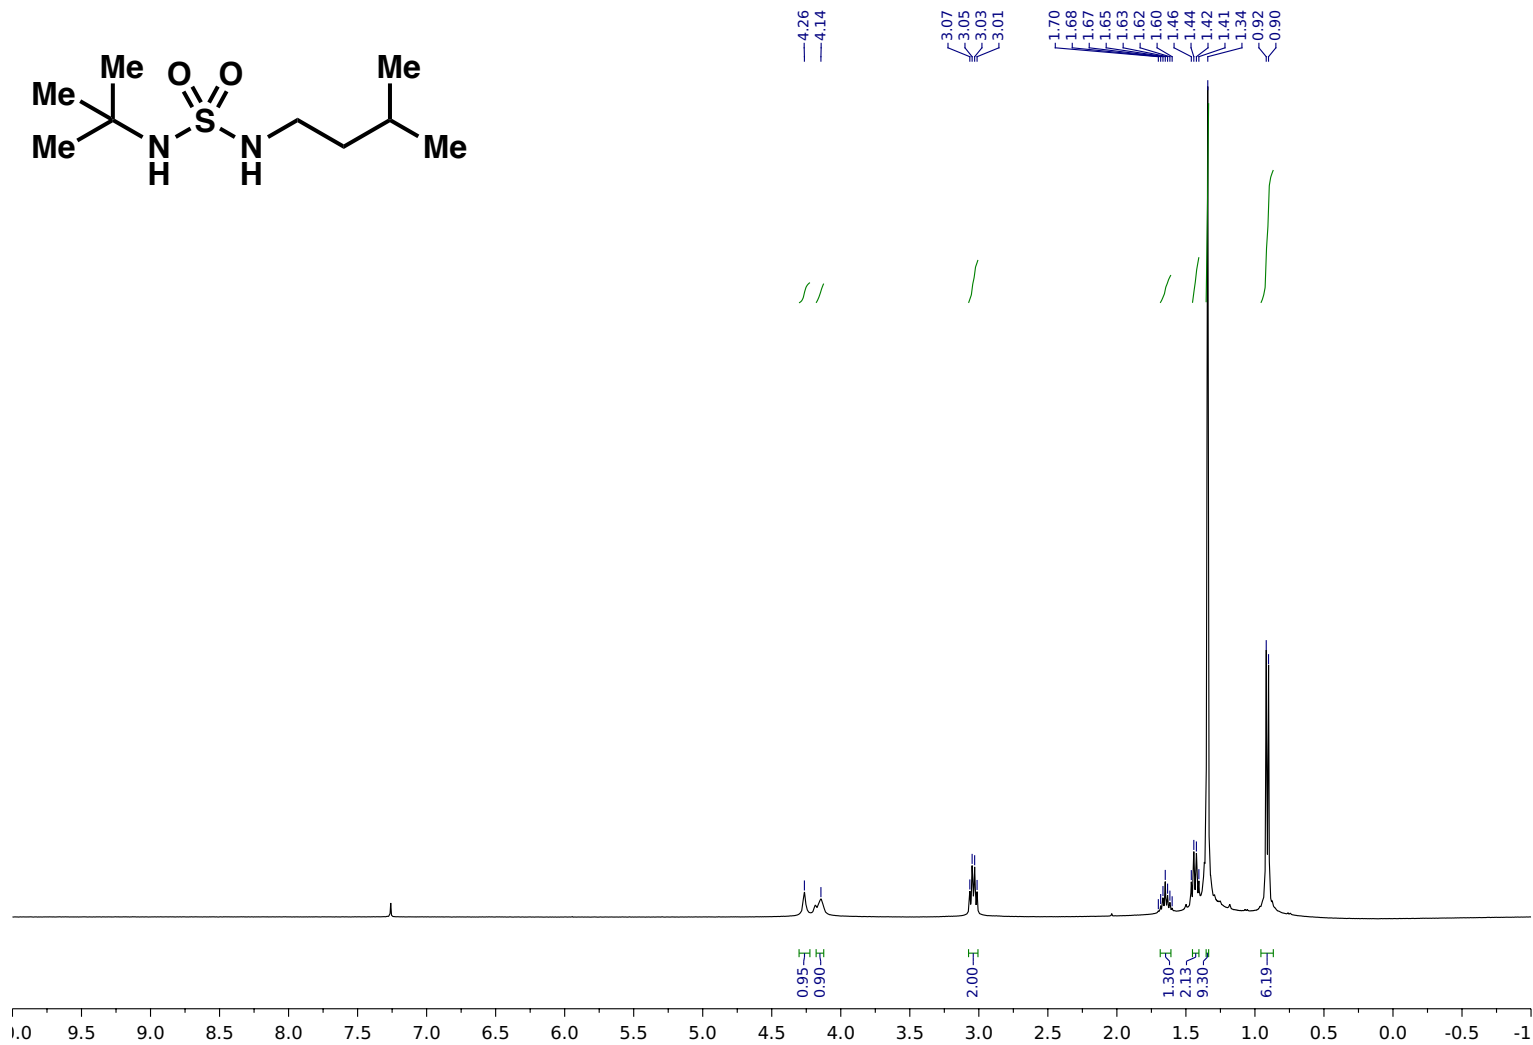

<sup>1</sup>H NMR (400 MHz, CDCl<sub>3</sub>) for *N*-*tert*-butyl-*N'*-isopentylsulfamide (S6c)

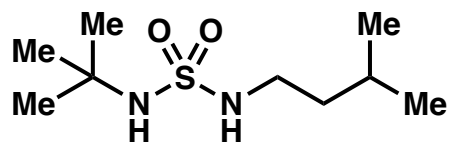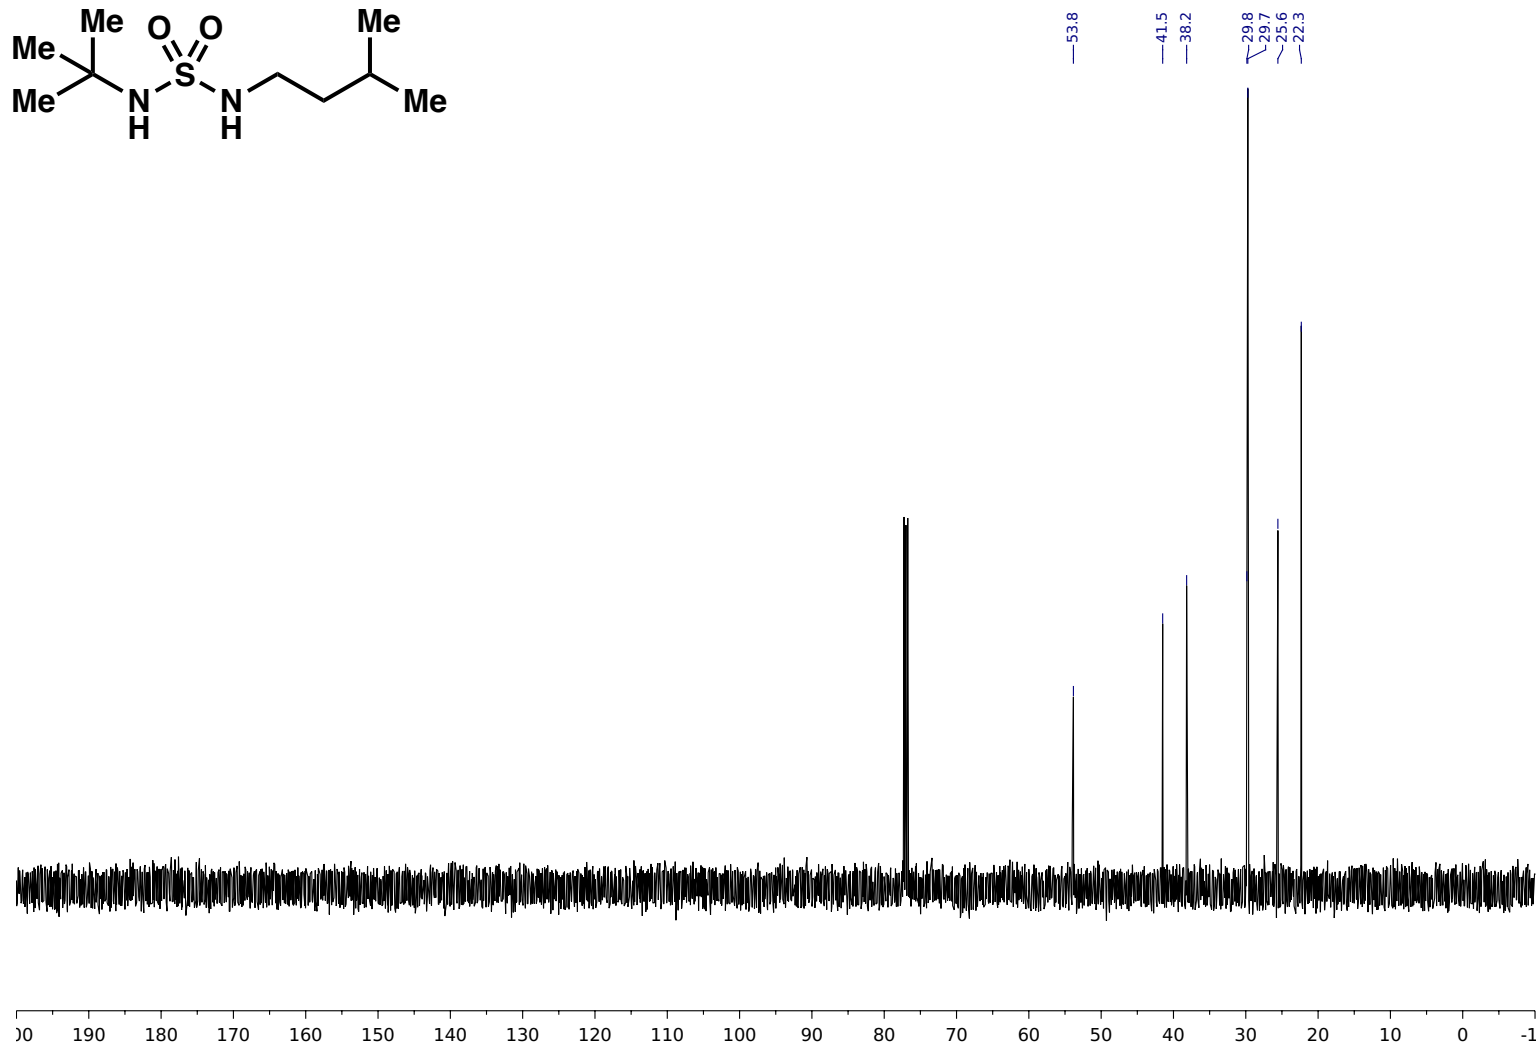

<sup>13</sup>C NMR (126 MHz, CDCl<sub>3</sub>) for *N-tert-butyl-N'-isopentylsulfamide* (S6c)

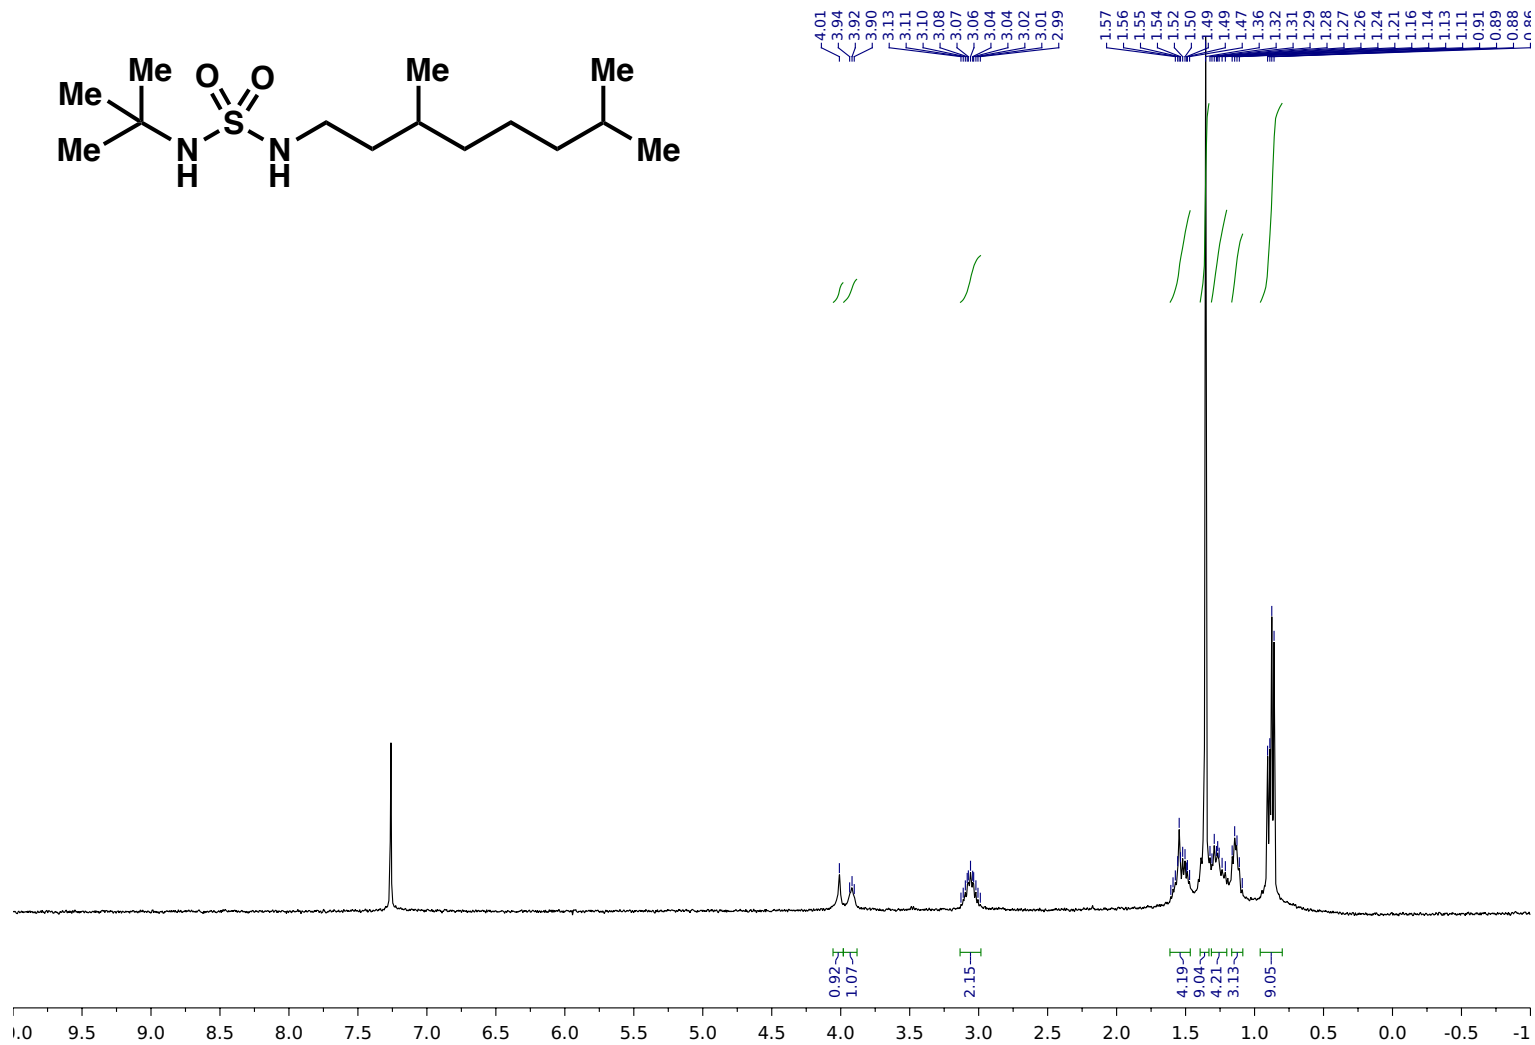

<sup>1</sup>H NMR (400 MHz, CDCl<sub>3</sub>) for *N*-*tert*-butyl-*N'*-(3,7-dimethyloct-1-yl)sulfamide (S6h)

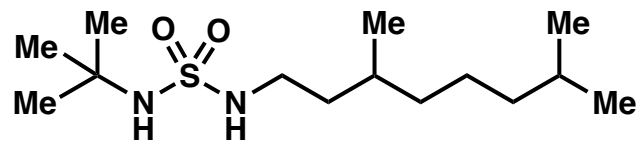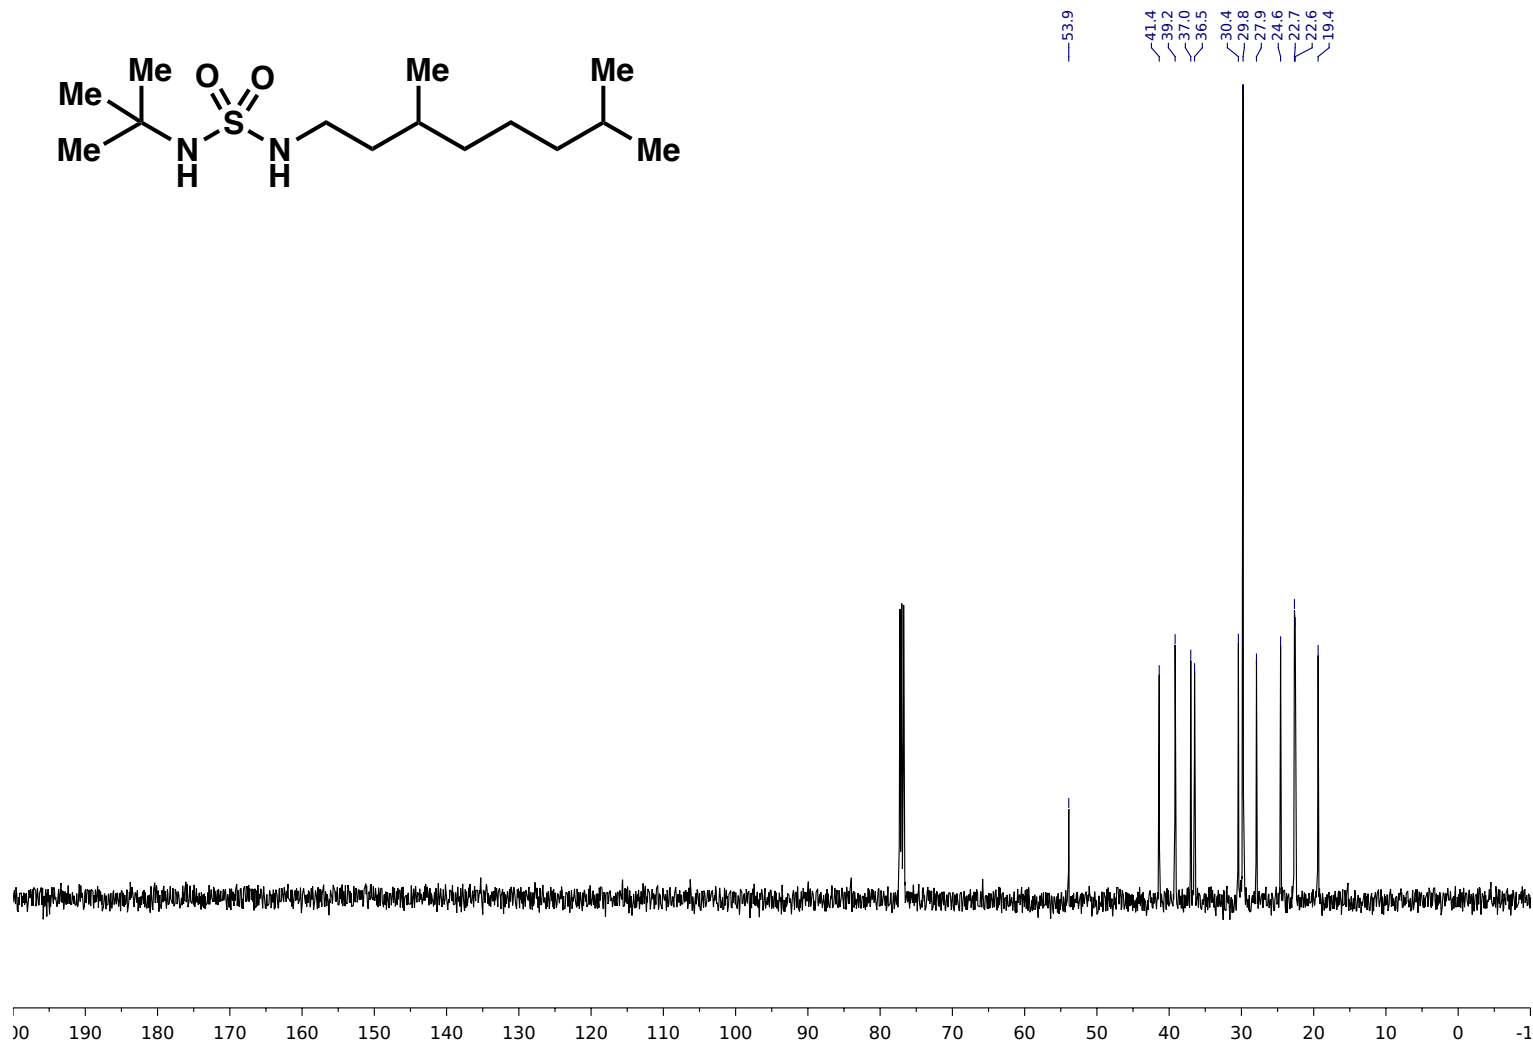

<sup>13</sup>C NMR (126 MHz, CDCl<sub>3</sub>) for *N*-*tert*-butyl-*N'*-(3,7-dimethyloct-1-yl)sulfamide (S6h)

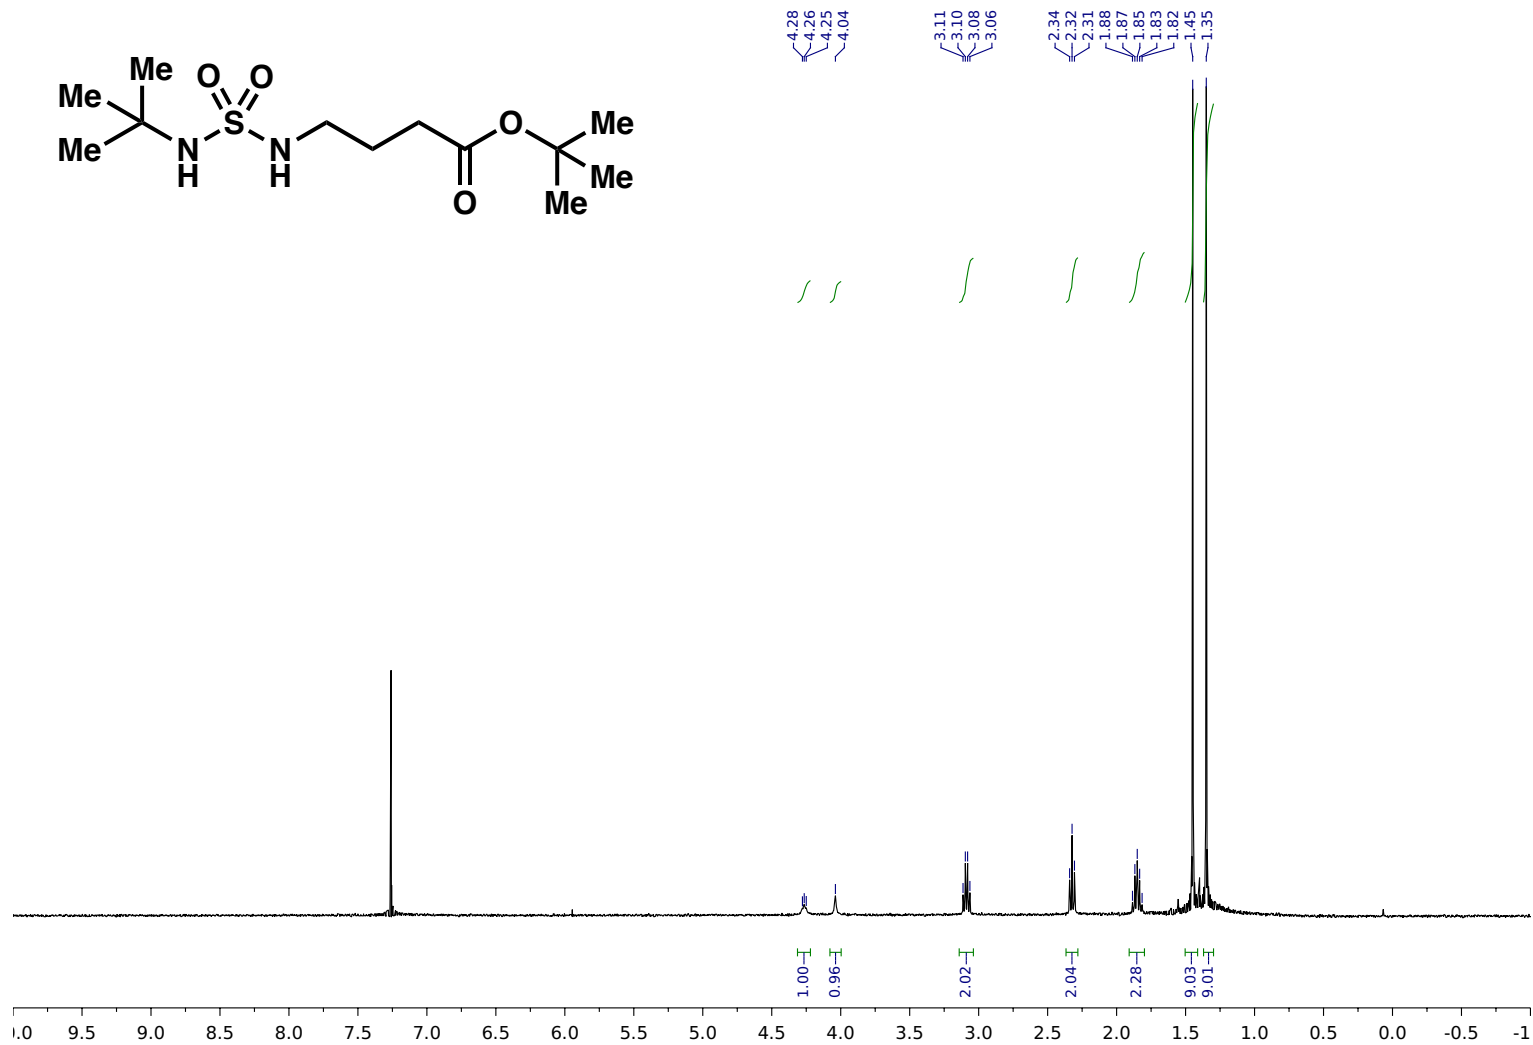

<sup>1</sup>H NMR (400 MHz, CDCl<sub>3</sub>) for *N*-(*tert*-butyl butano-4-yl)-*N'*-*tert*-butylsulfamide (S6t)

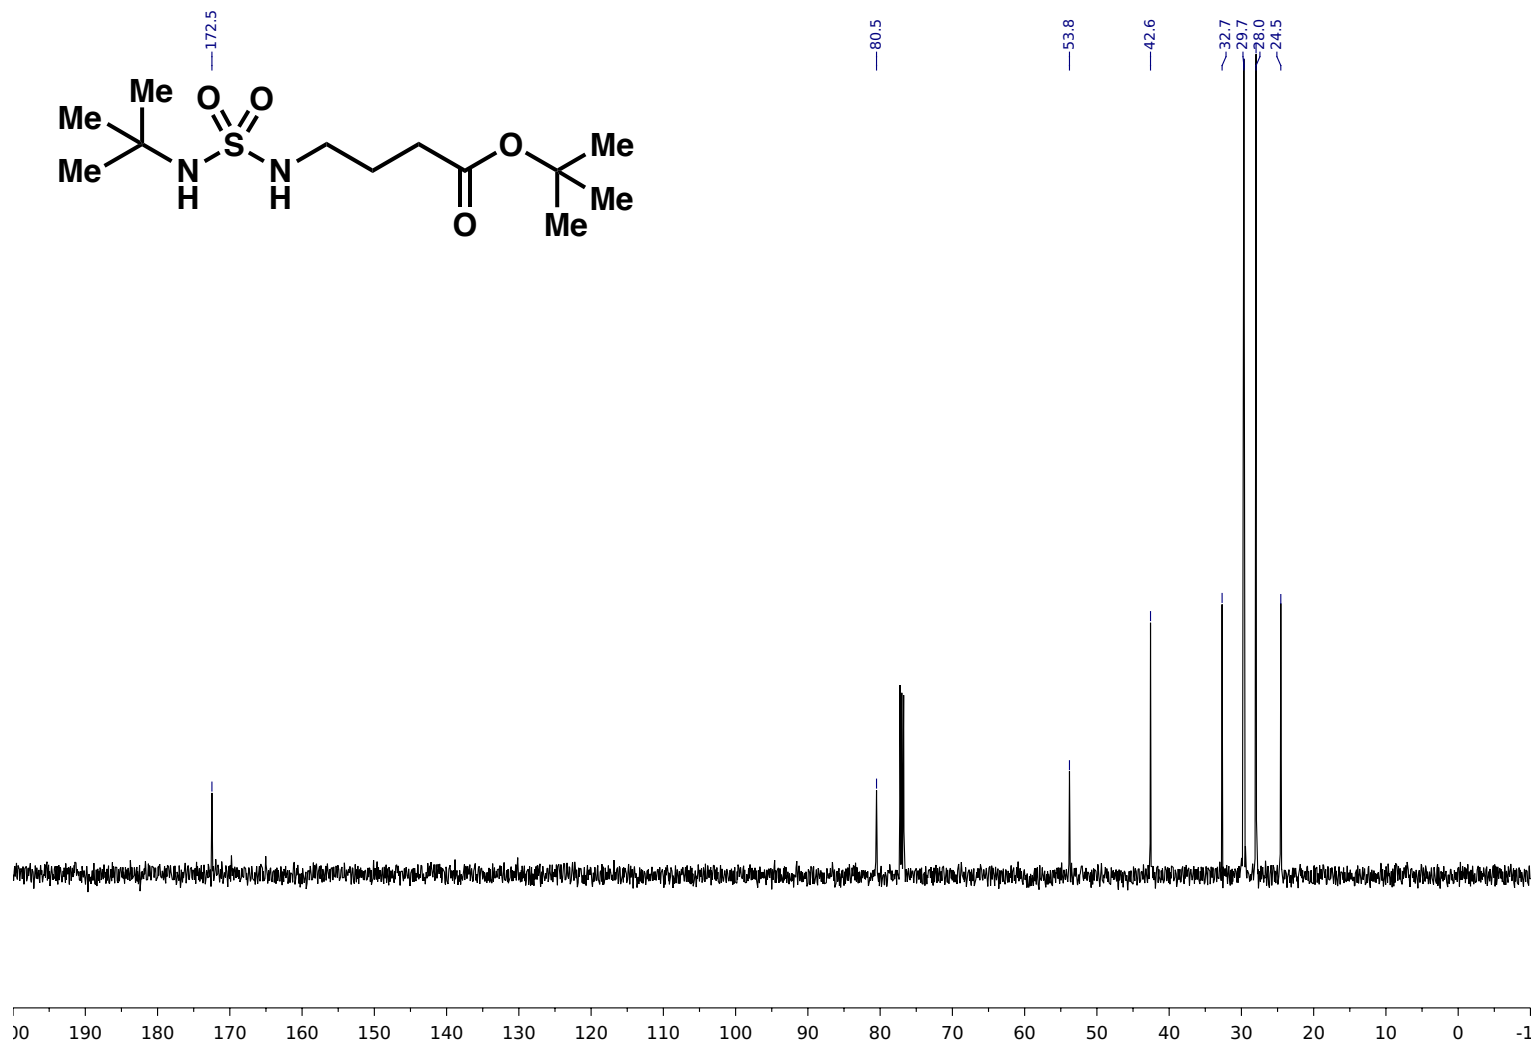

<sup>13</sup>C NMR (126 MHz, CDCl<sub>3</sub>) for *N*-(*tert*-butyl butano-4-yl)-*N'*-*tert*-butylsulfamide (**S6t**)



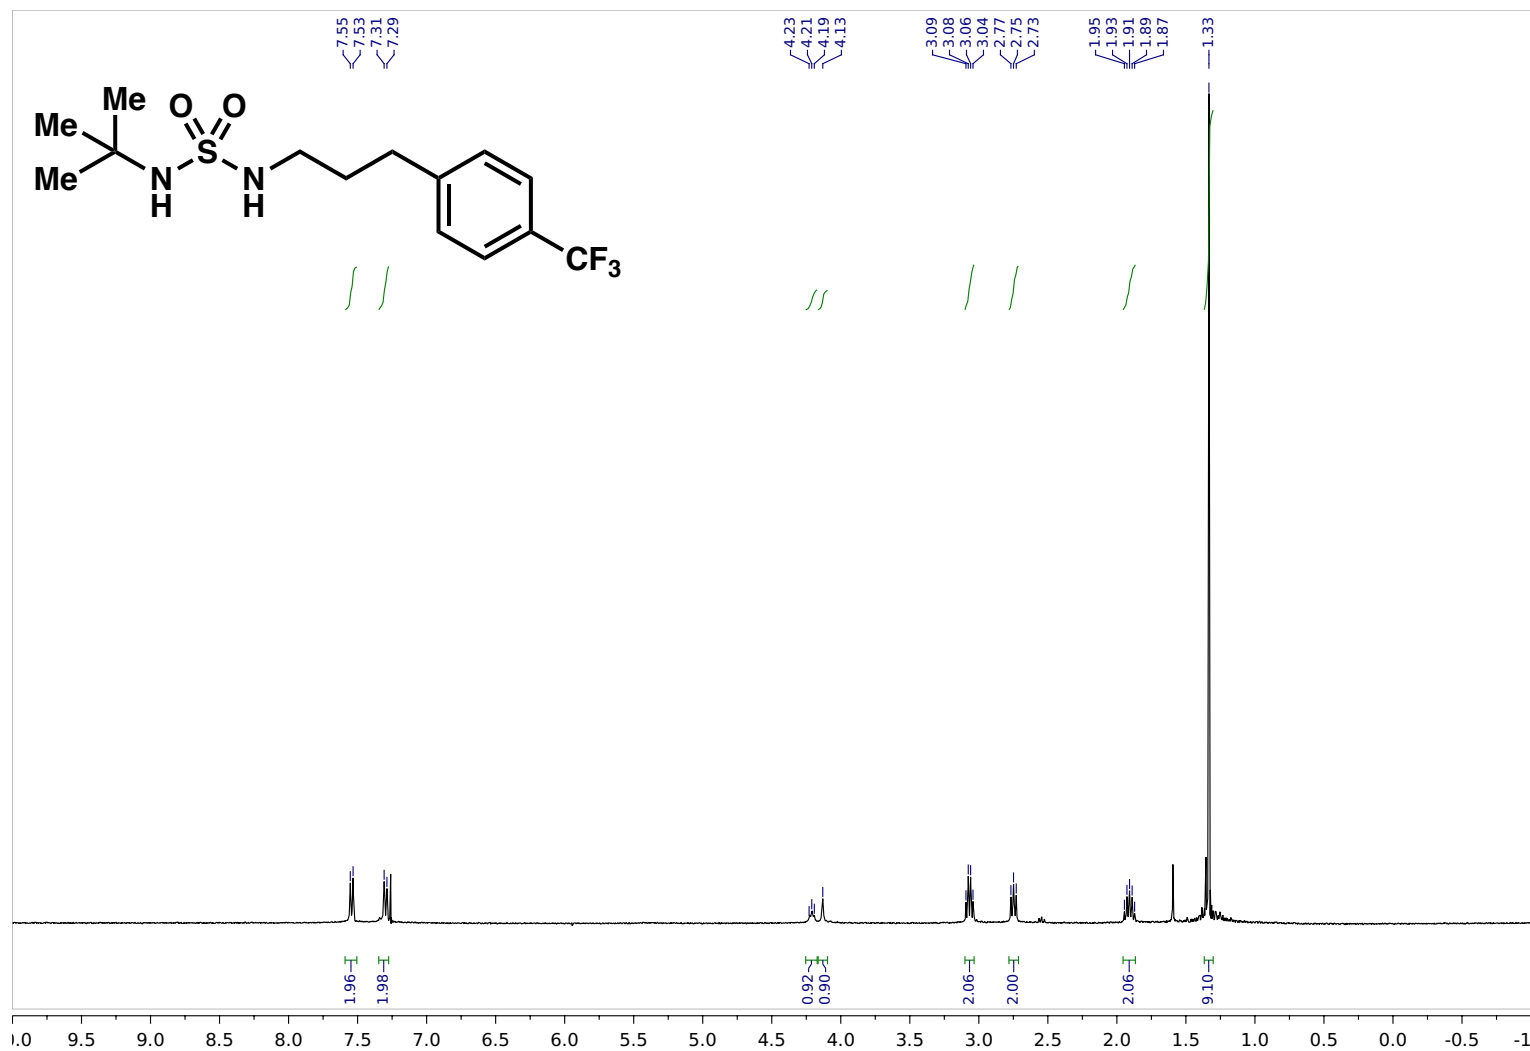

<sup>1</sup>H NMR (400 MHz, CDCl<sub>3</sub>) for *N*-*tert*-butyl-*N'*-(3-(4-trifluoromethyl)phenyl)prop-1-ylsulfamide (S6u)

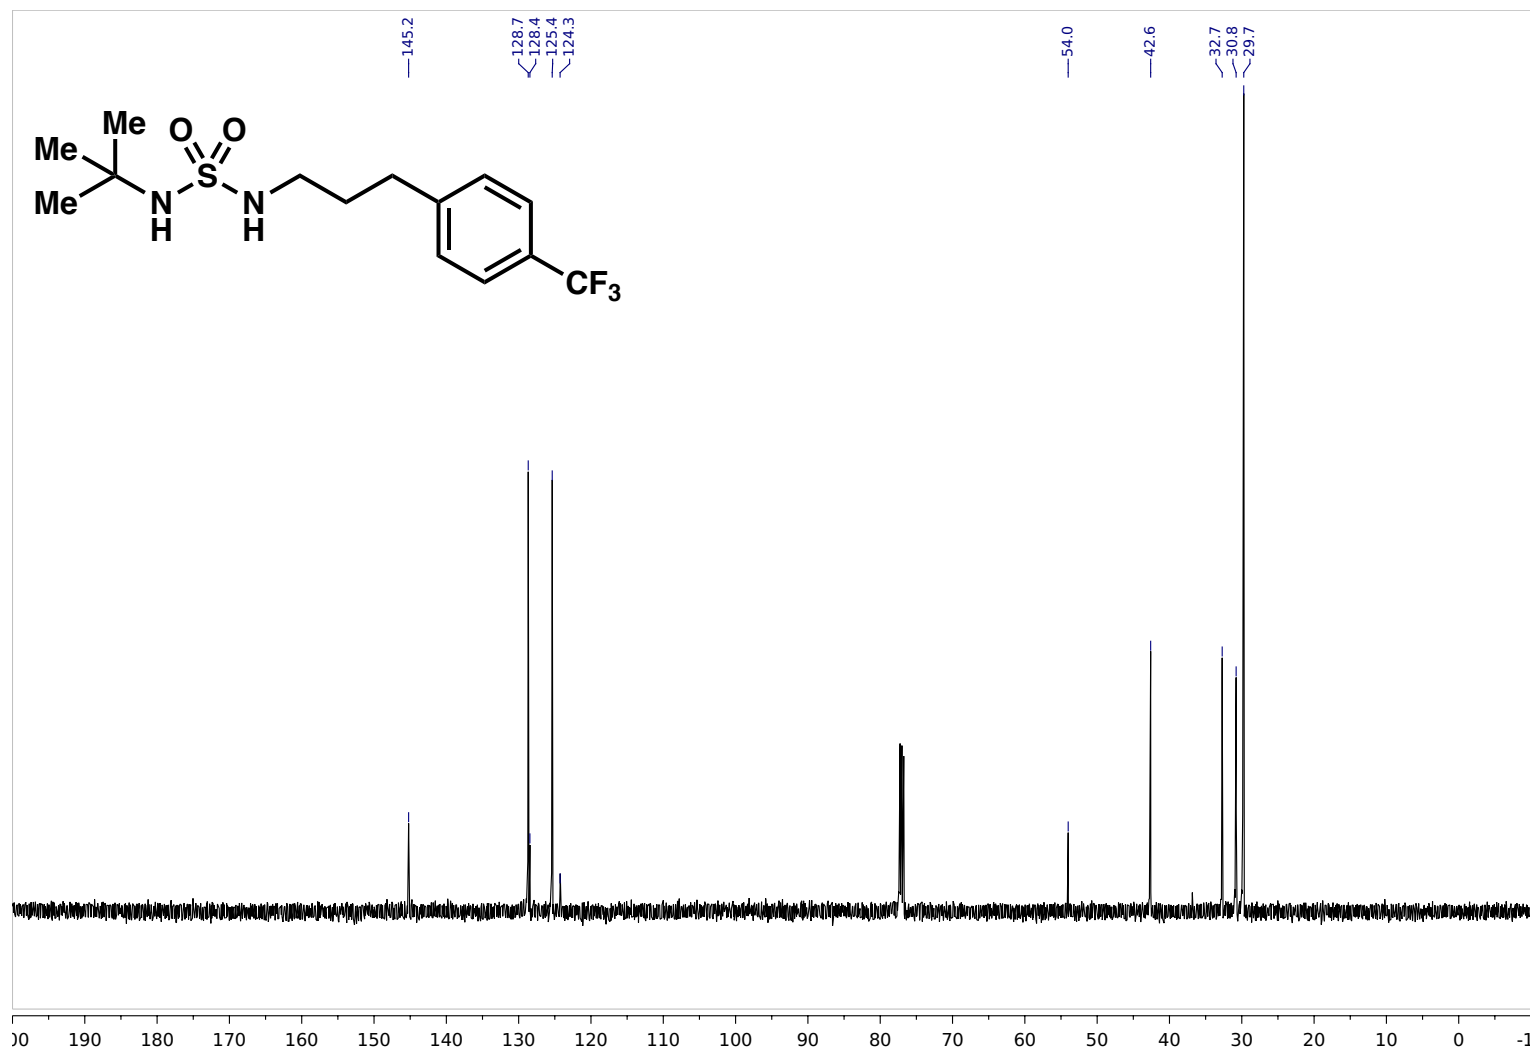

<sup>13</sup>C NMR (126 MHz, CDCl<sub>3</sub>, <sup>1</sup>H and <sup>19</sup>F decoupled) for *N-tert-butyl-N'-(3-(4-trifluoromethyl)phenyl)prop-1-ylsulfamide* (S6u)

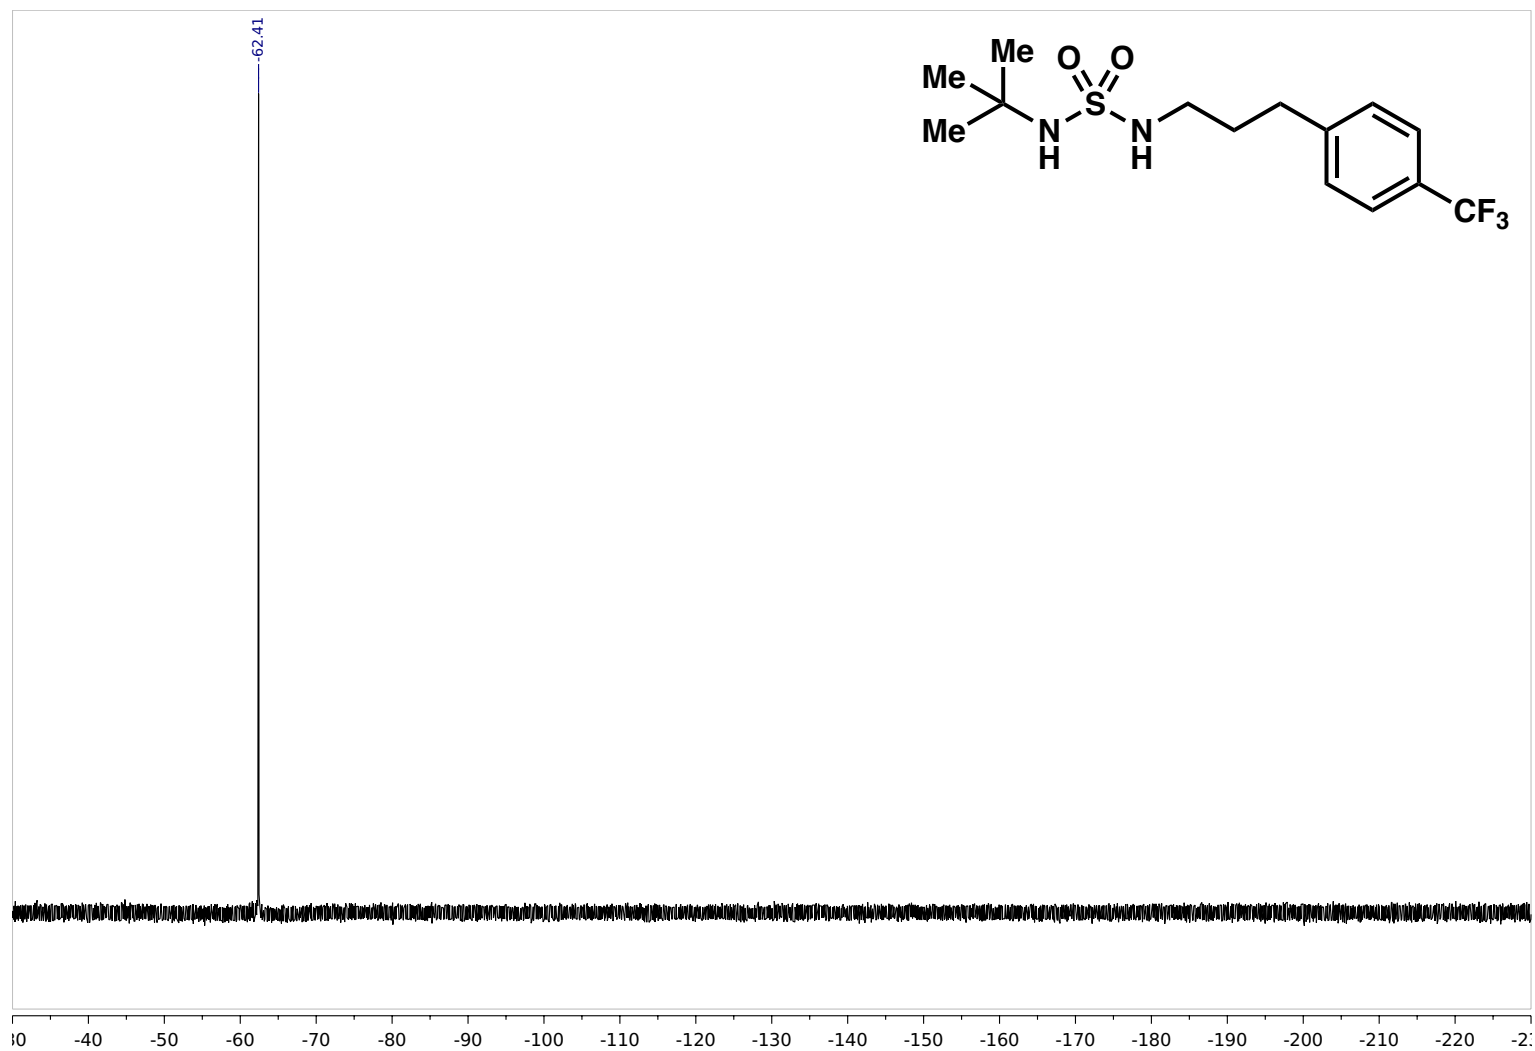

$^{19}\text{F}$  NMR (376 MHz,  $\text{CDCl}_3$ ) for *N*-*tert*-butyl-*N'*-(3-(4-trifluoromethyl)phenyl)prop-1-ylsulfamide (S6u)

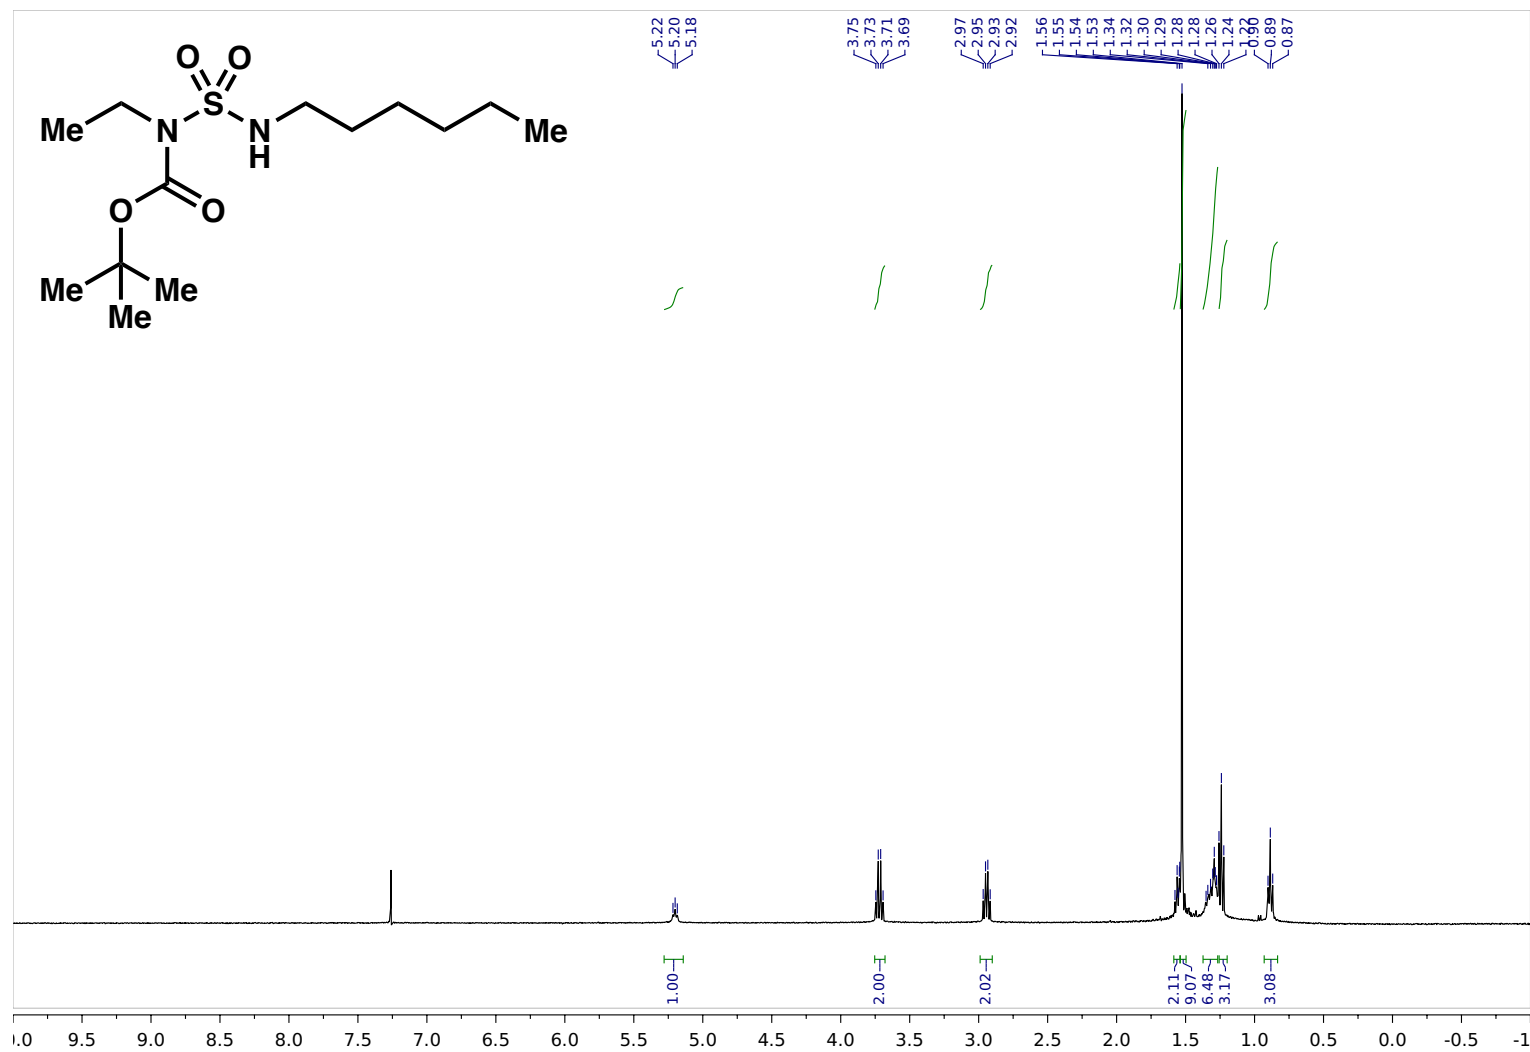

<sup>1</sup>H NMR (400 MHz, CDCl<sub>3</sub>) for *N*-*tert*-butoxycarbonyl-*N*-ethyl-*N'*-hexylsulfamide (S7a)

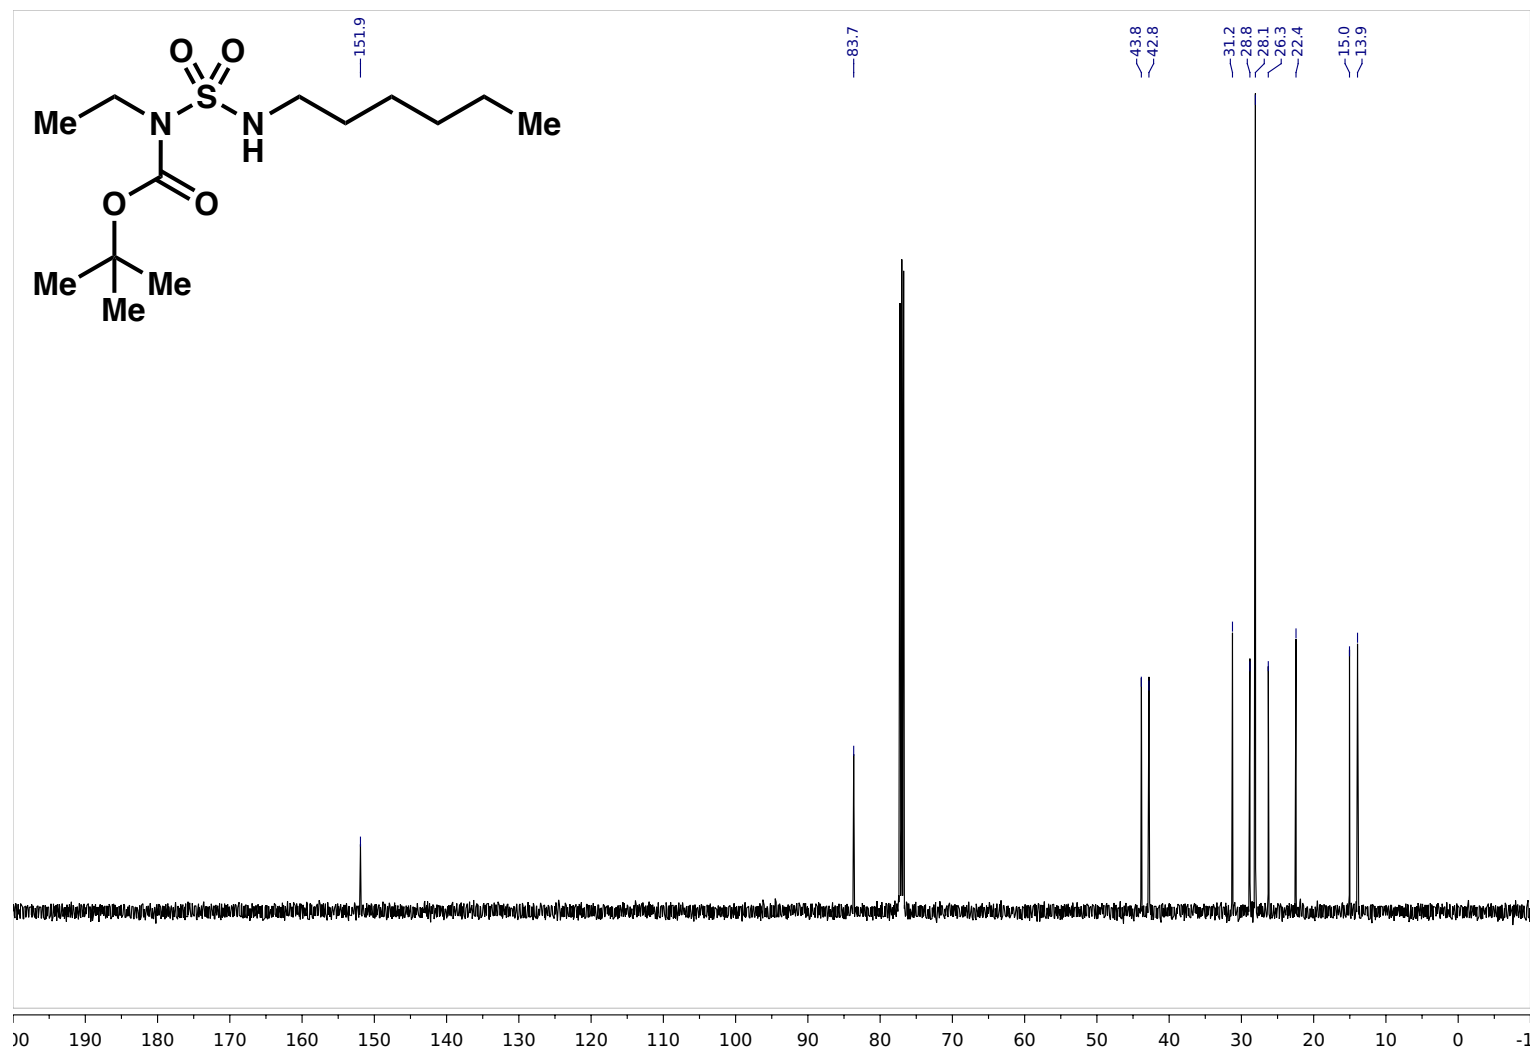

<sup>13</sup>C NMR (126 MHz, CDCl<sub>3</sub>) for *N*-*tert*-butoxycarbonyl-*N*-ethyl-*N'*-hexylsulfamide (S7a)

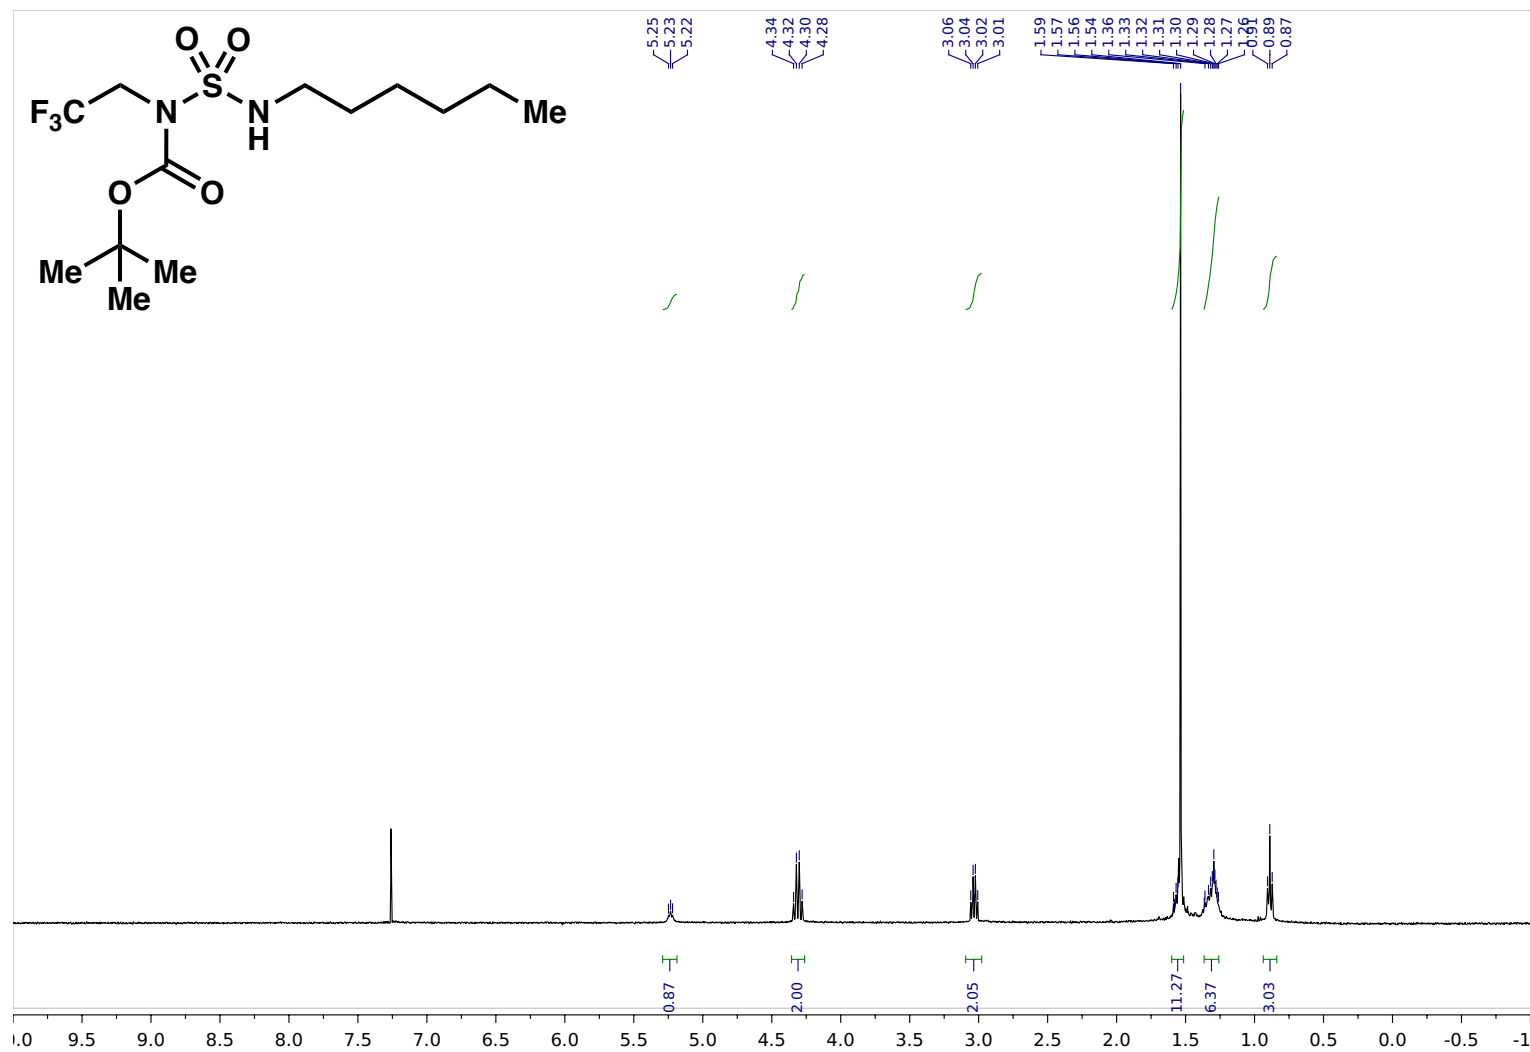

<sup>1</sup>H NMR (400 MHz, CDCl<sub>3</sub>) for *N*-*tert*-butoxycarbonyl-*N'*-hexyl-*N*-(2,2,2-trifluoro)ethylsulfamide (**S7b**)

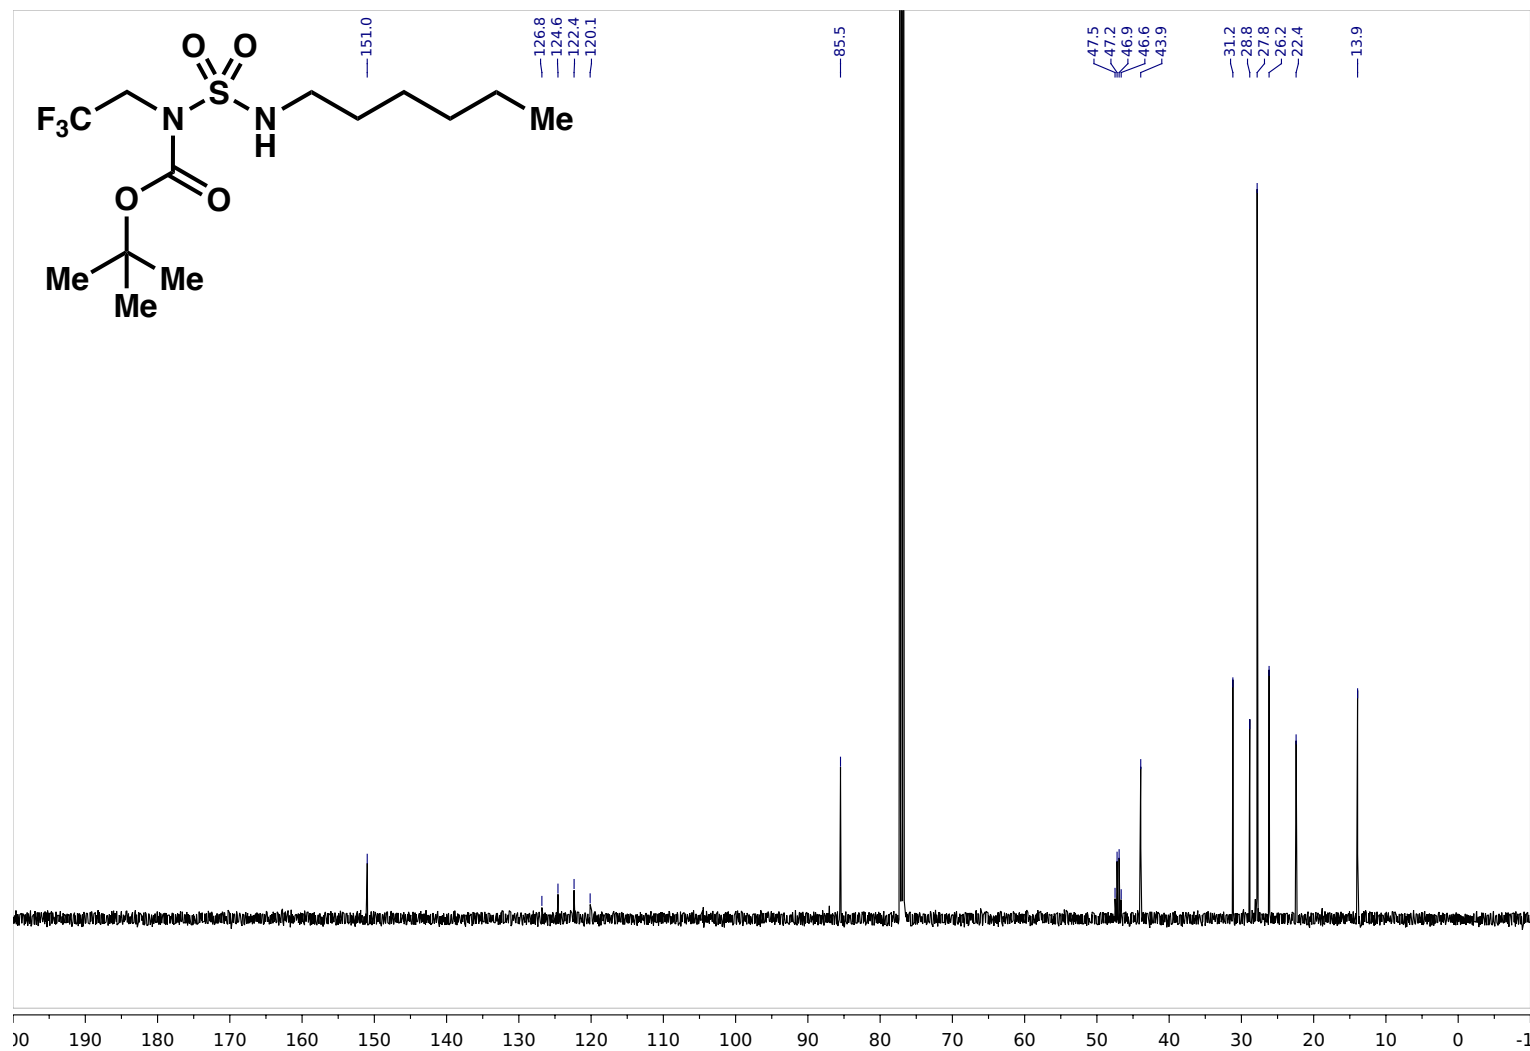

<sup>13</sup>C NMR (126 MHz, CDCl<sub>3</sub>) for *N*-*tert*-butoxycarbonyl-*N'*-hexyl-*N*-(2,2,2-trifluoro)ethylsulfamide (**S7b**)

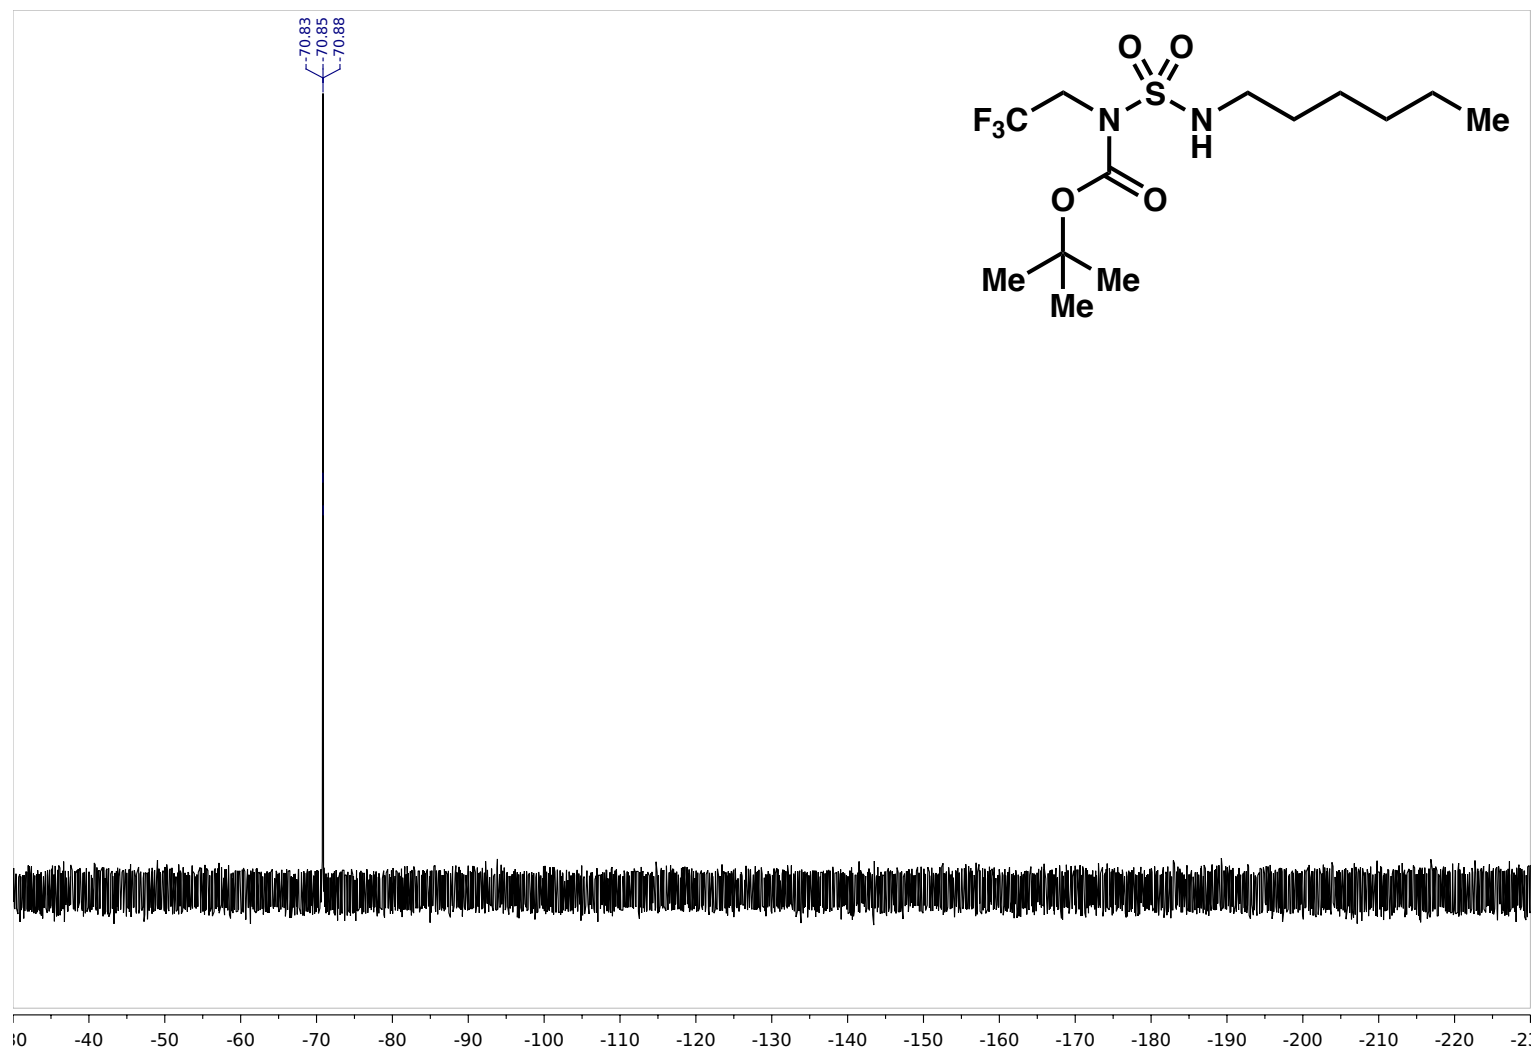

$^{19}\text{F}$  NMR (376 MHz,  $\text{CDCl}_3$ ) for *N*-*tert*-butoxycarbonyl-*N'*-hexyl-*N*-(2,2,2-trifluoro)ethylsulfamide (**S7b**)



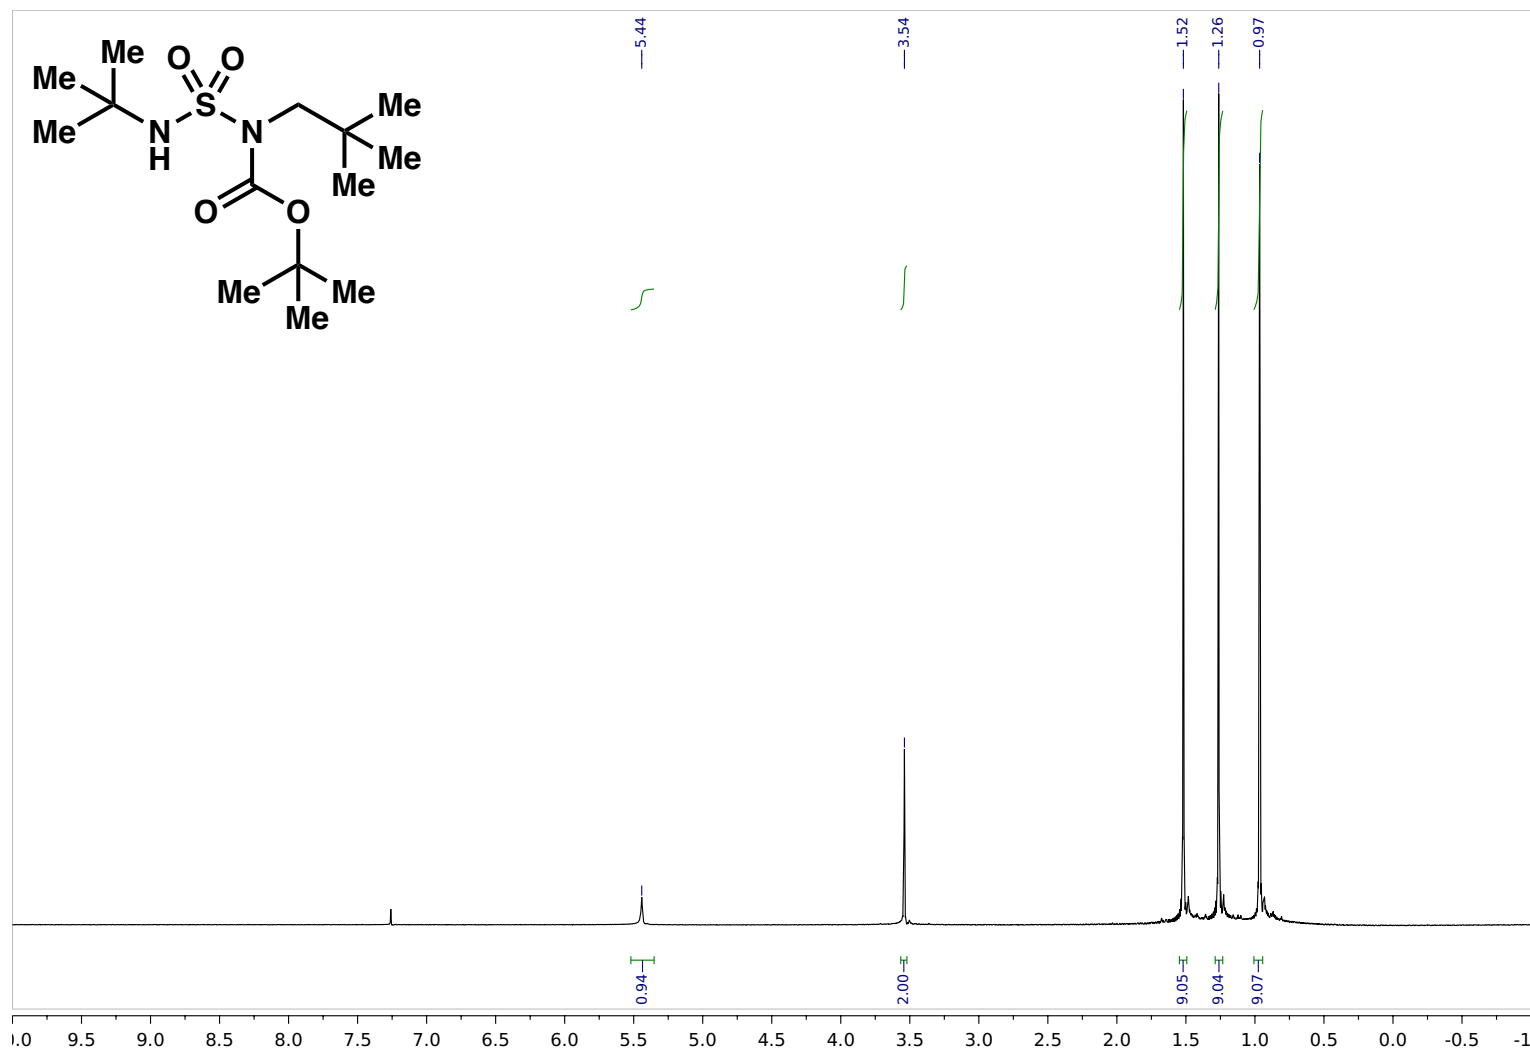

<sup>1</sup>H NMR (400 MHz, CDCl<sub>3</sub>) for *N*-*tert*-butoxycarbonyl-*N'*-*tert*-butyl-*N*-neopentylsulfamide (S8a)

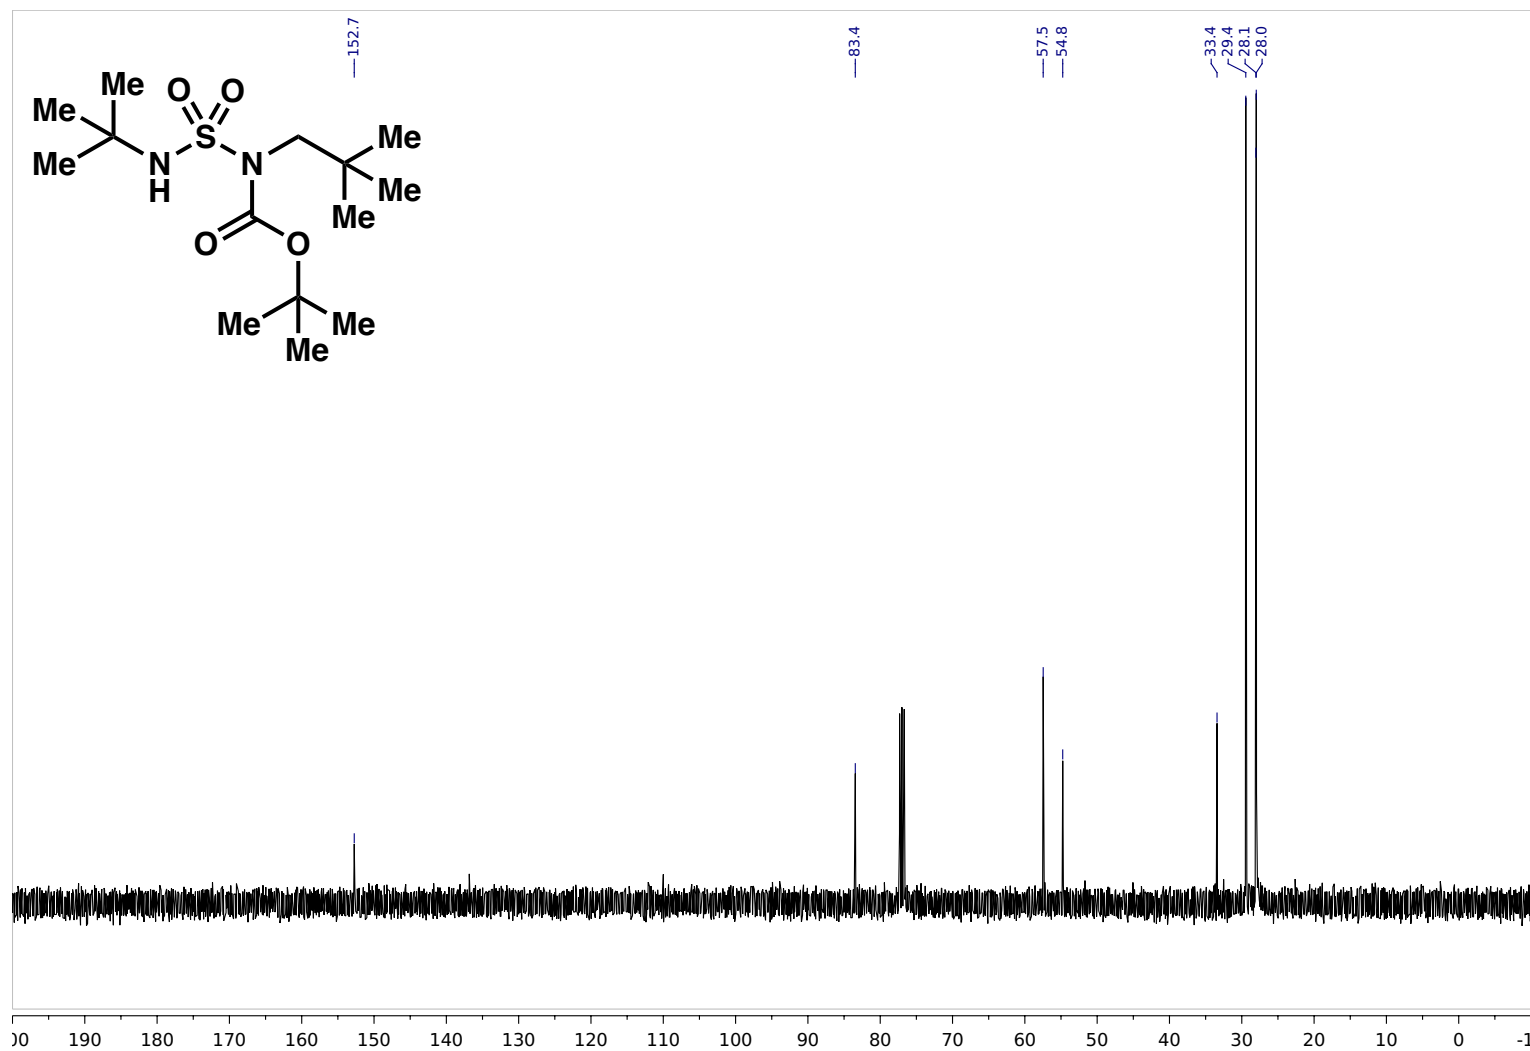

<sup>13</sup>C NMR (101 MHz, CDCl<sub>3</sub>) for *N*-*tert*-butoxycarbonyl-*N'*-*tert*-butyl-*N*-neopentylsulfamide (S8a)

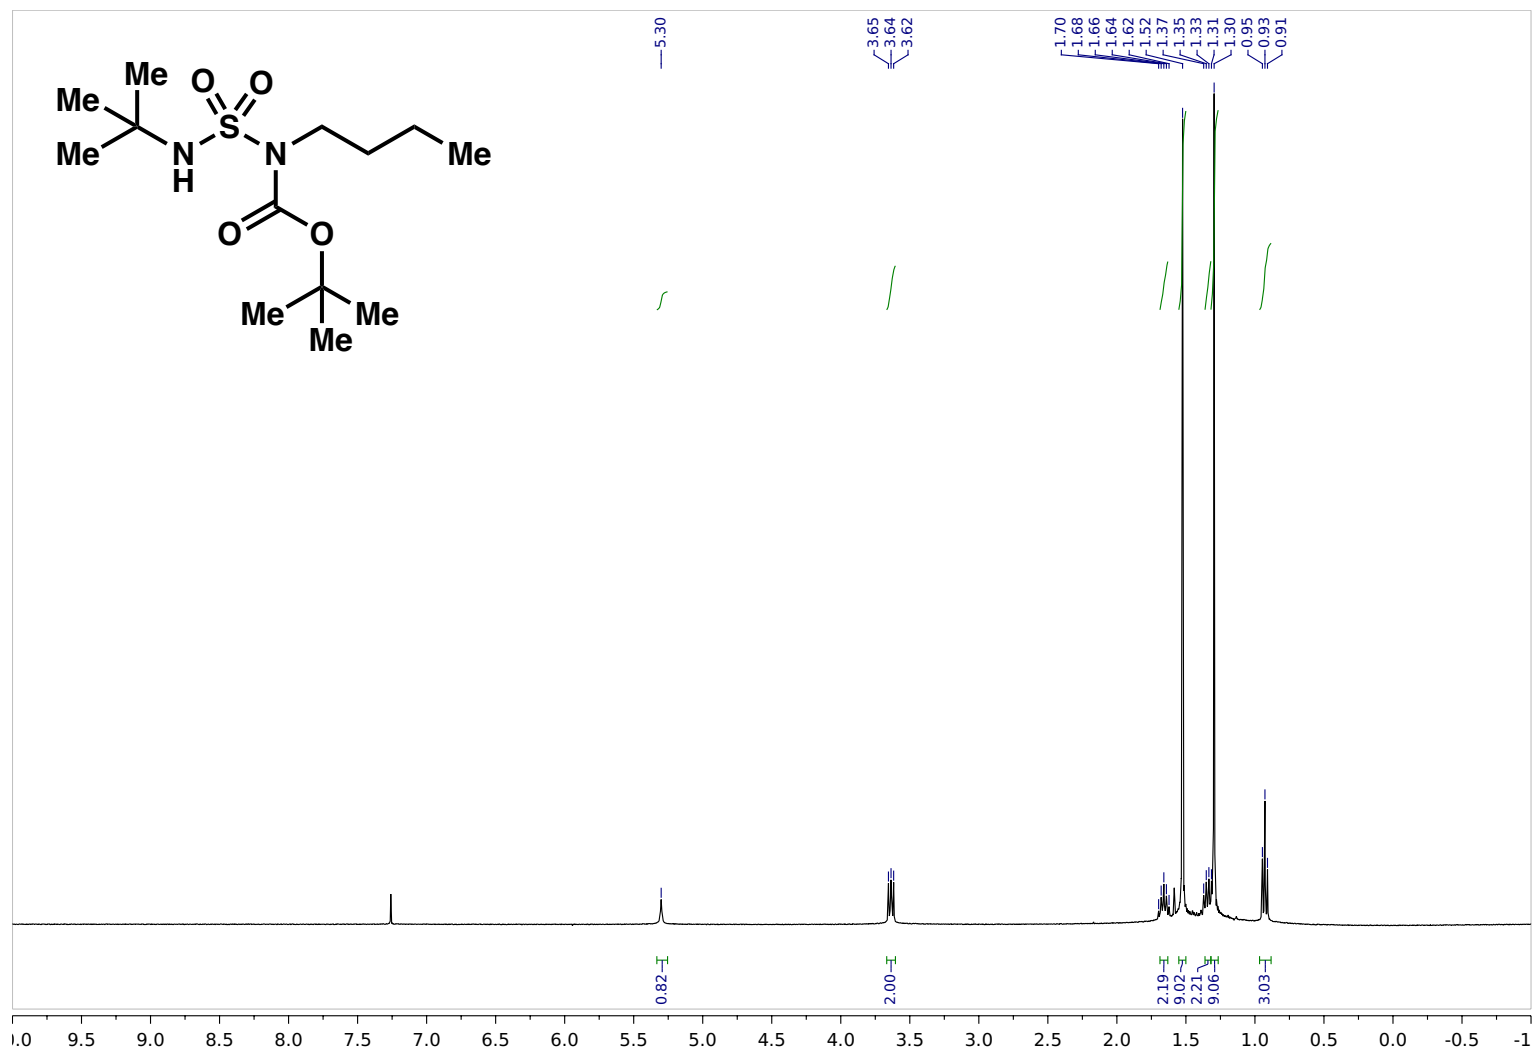

$^1\text{H}$  NMR (400 MHz,  $\text{CDCl}_3$ ) for *N*-*tert*-butoxycarbonyl-*N*-butyl-*N'*-*tert*-butylsulfamide (**S8b**)

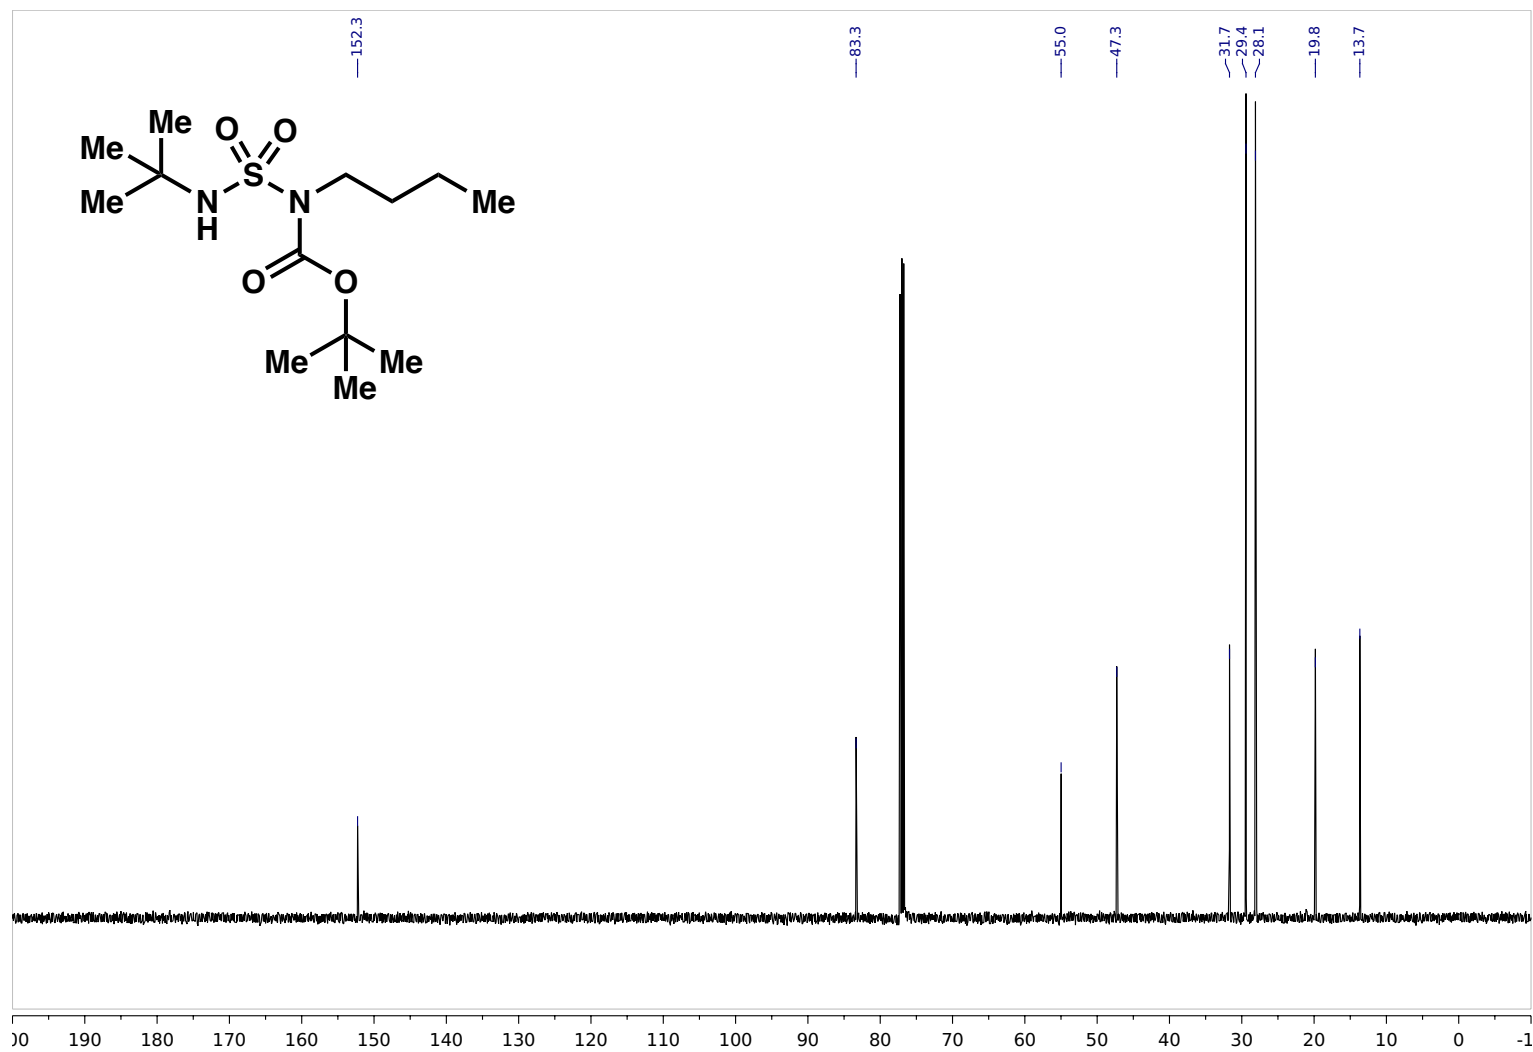

<sup>13</sup>C NMR (126 MHz, CDCl<sub>3</sub>) for *N*-*tert*-butoxycarbonyl-*N*-butyl-*N'*-*tert*-butylsulfamide (S8b)

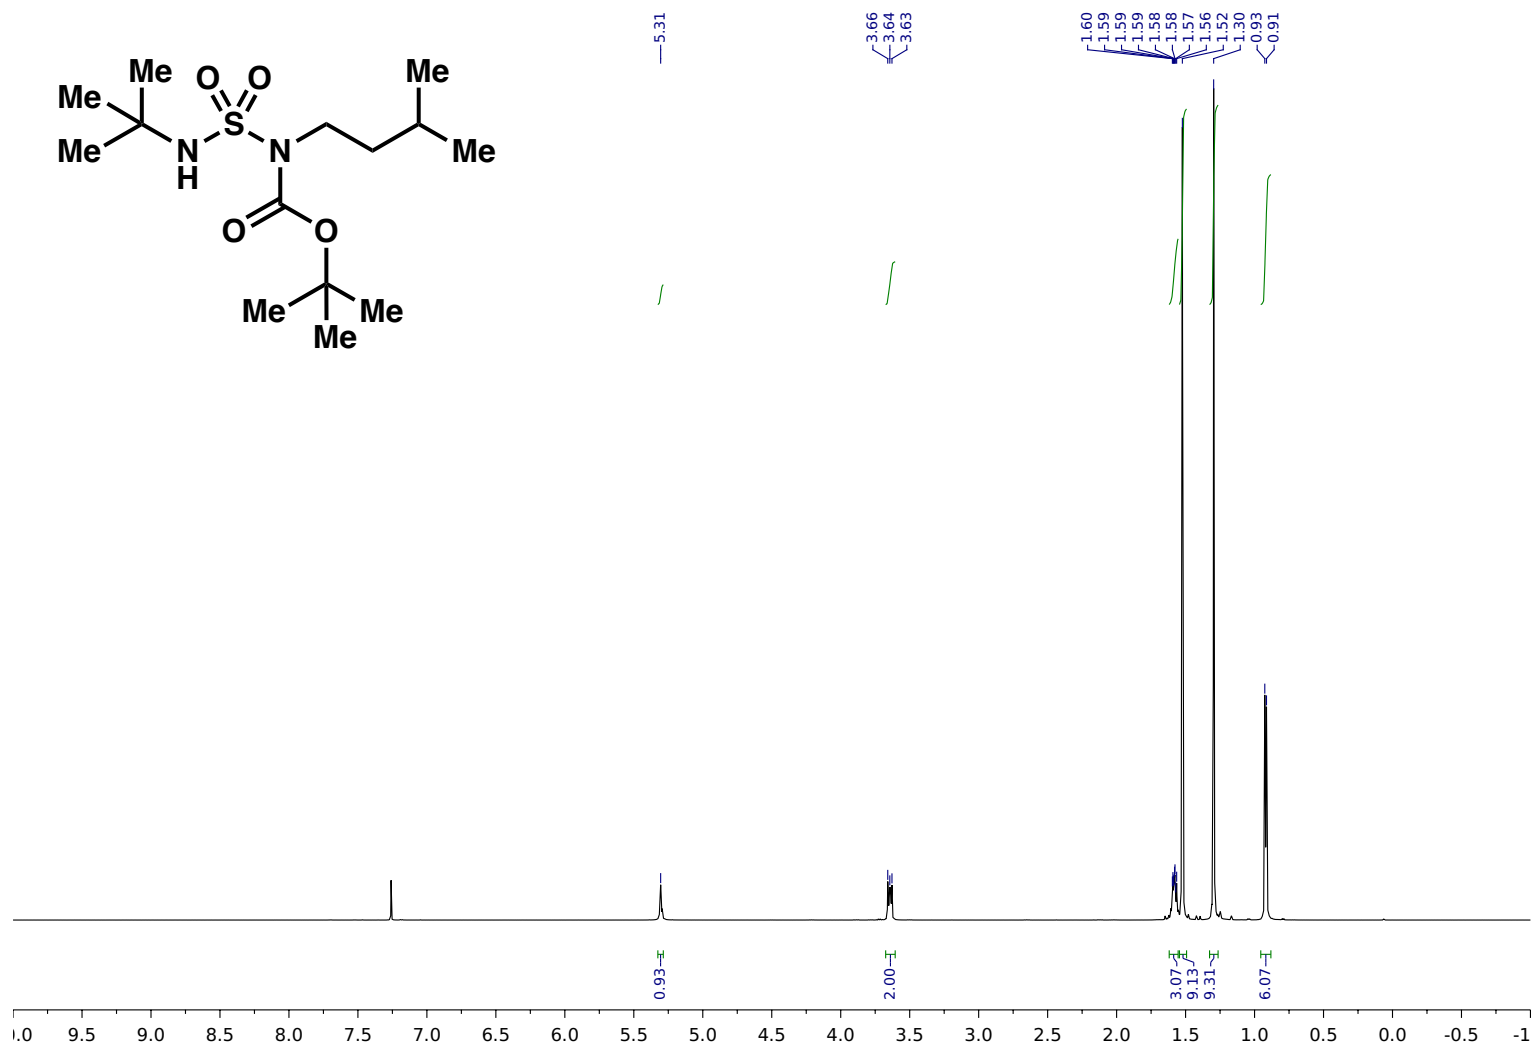

<sup>1</sup>H NMR (400 MHz, C<sub>6</sub>D<sub>6</sub>) for *N-tert-butoxycarbonyl-N'-tert-butyl-N-isopentylsulfamide* (S8c)

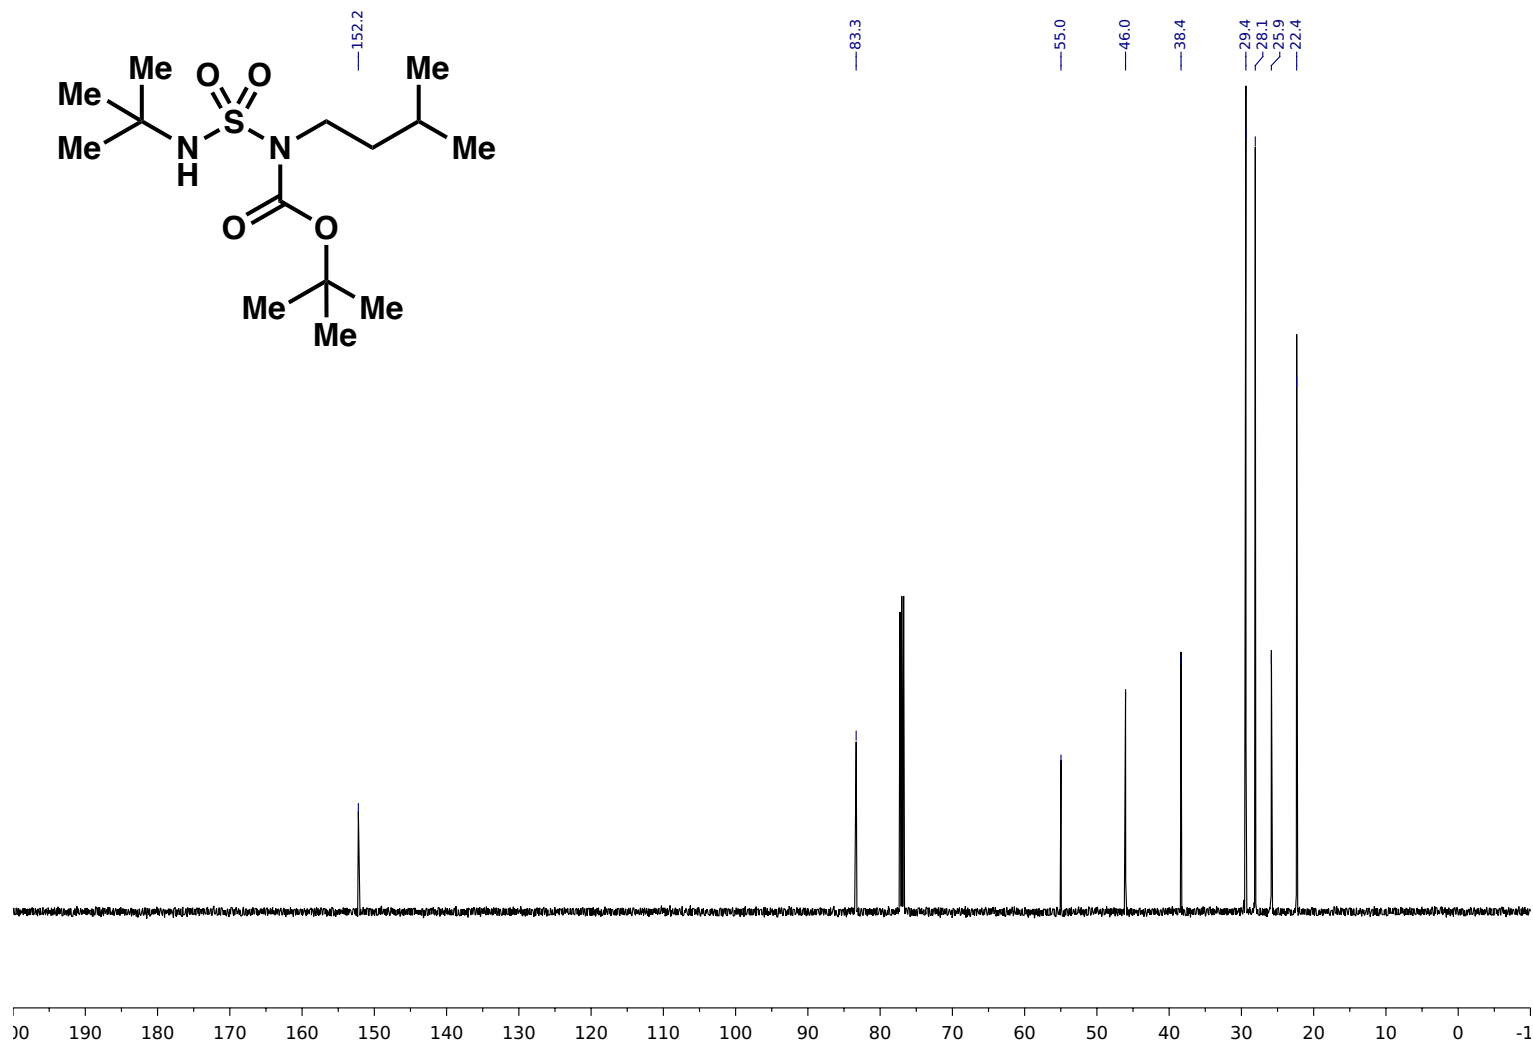

<sup>13</sup>C NMR (126 MHz, CDCl<sub>3</sub>) for *N*-*tert*-butoxycarbonyl-*N'*-*tert*-butyl-*N*-isopentylsulfamide (S8c)

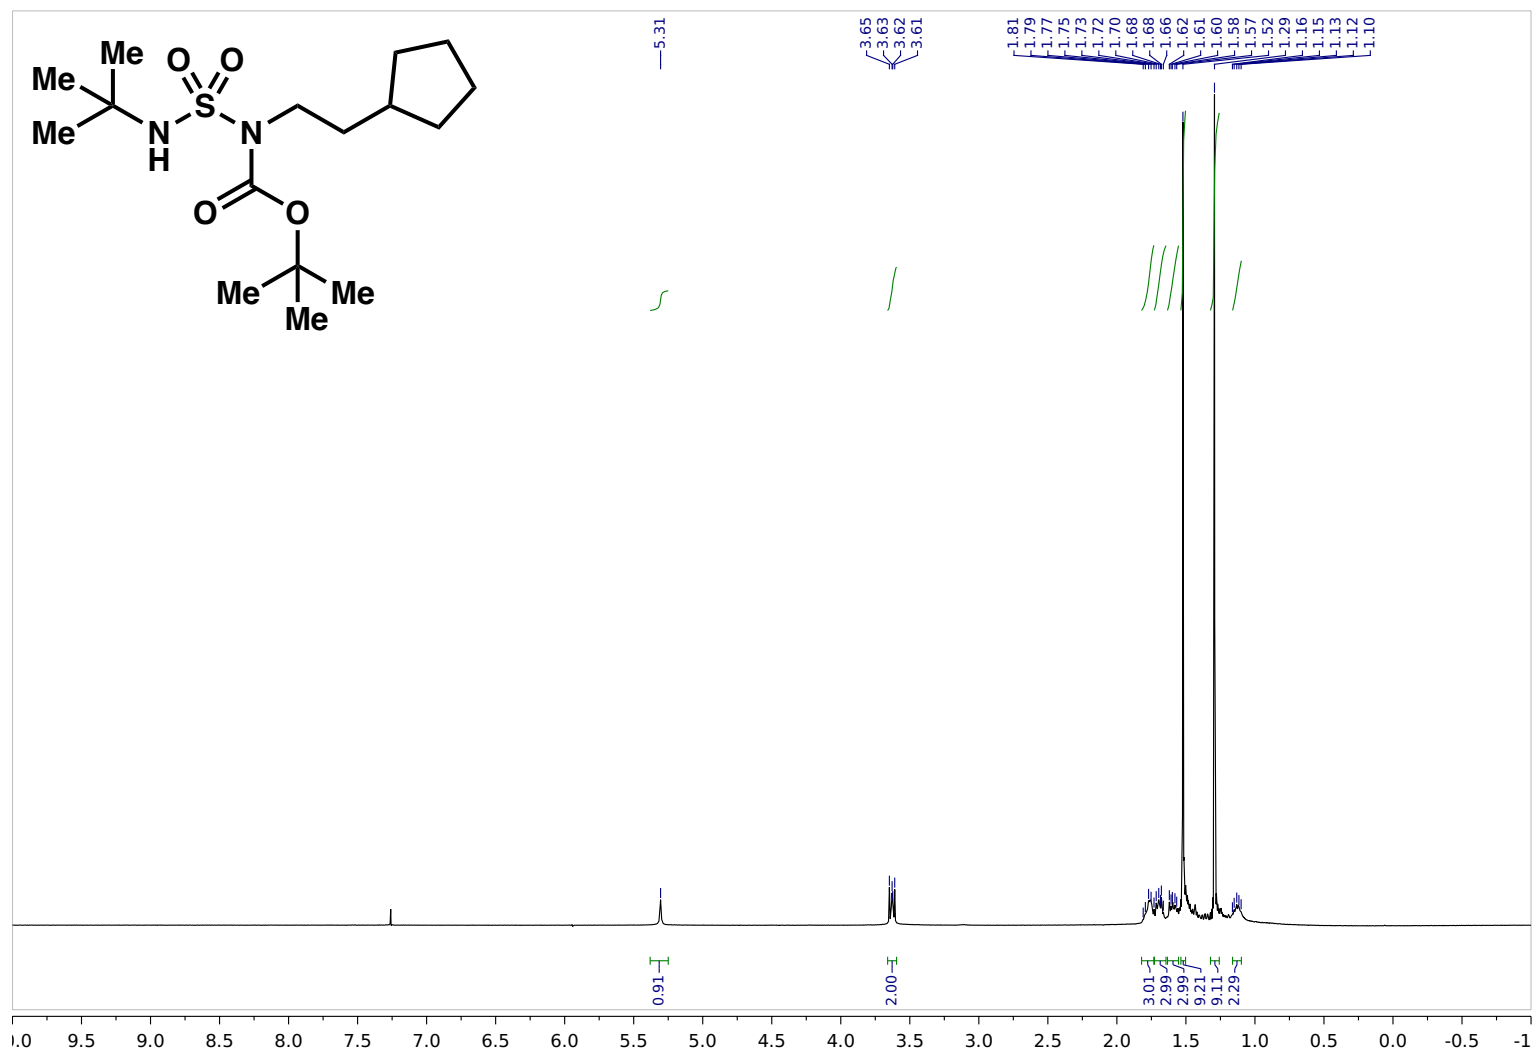

<sup>1</sup>H NMR (400 MHz, CDCl<sub>3</sub>) for *N*-*tert*-butoxycarbonyl-*N'*-*tert*-butyl-*N*-(2-(cyclopentyl)ethyl)sulfamide (**S8d**)

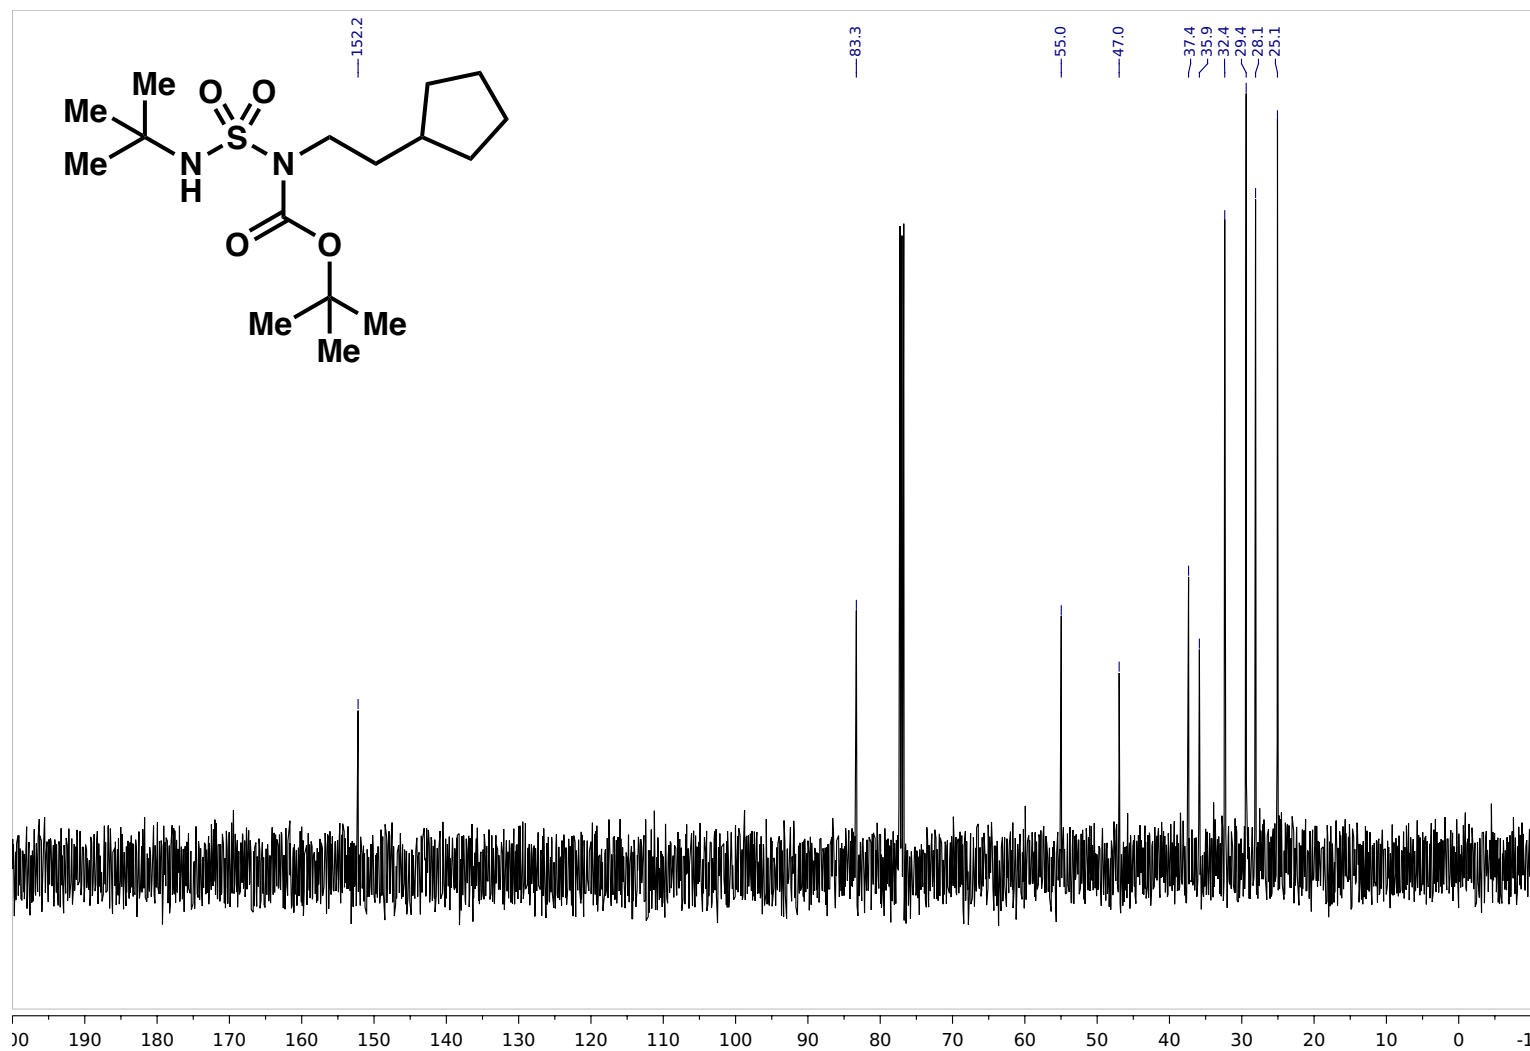

<sup>13</sup>C NMR (126 MHz, CDCl<sub>3</sub>) for *N*-tert-butoxycarbonyl-*N'*-tert-butyl-*N*-(2-(cyclopentyl)ethyl)sulfamide (S8d)



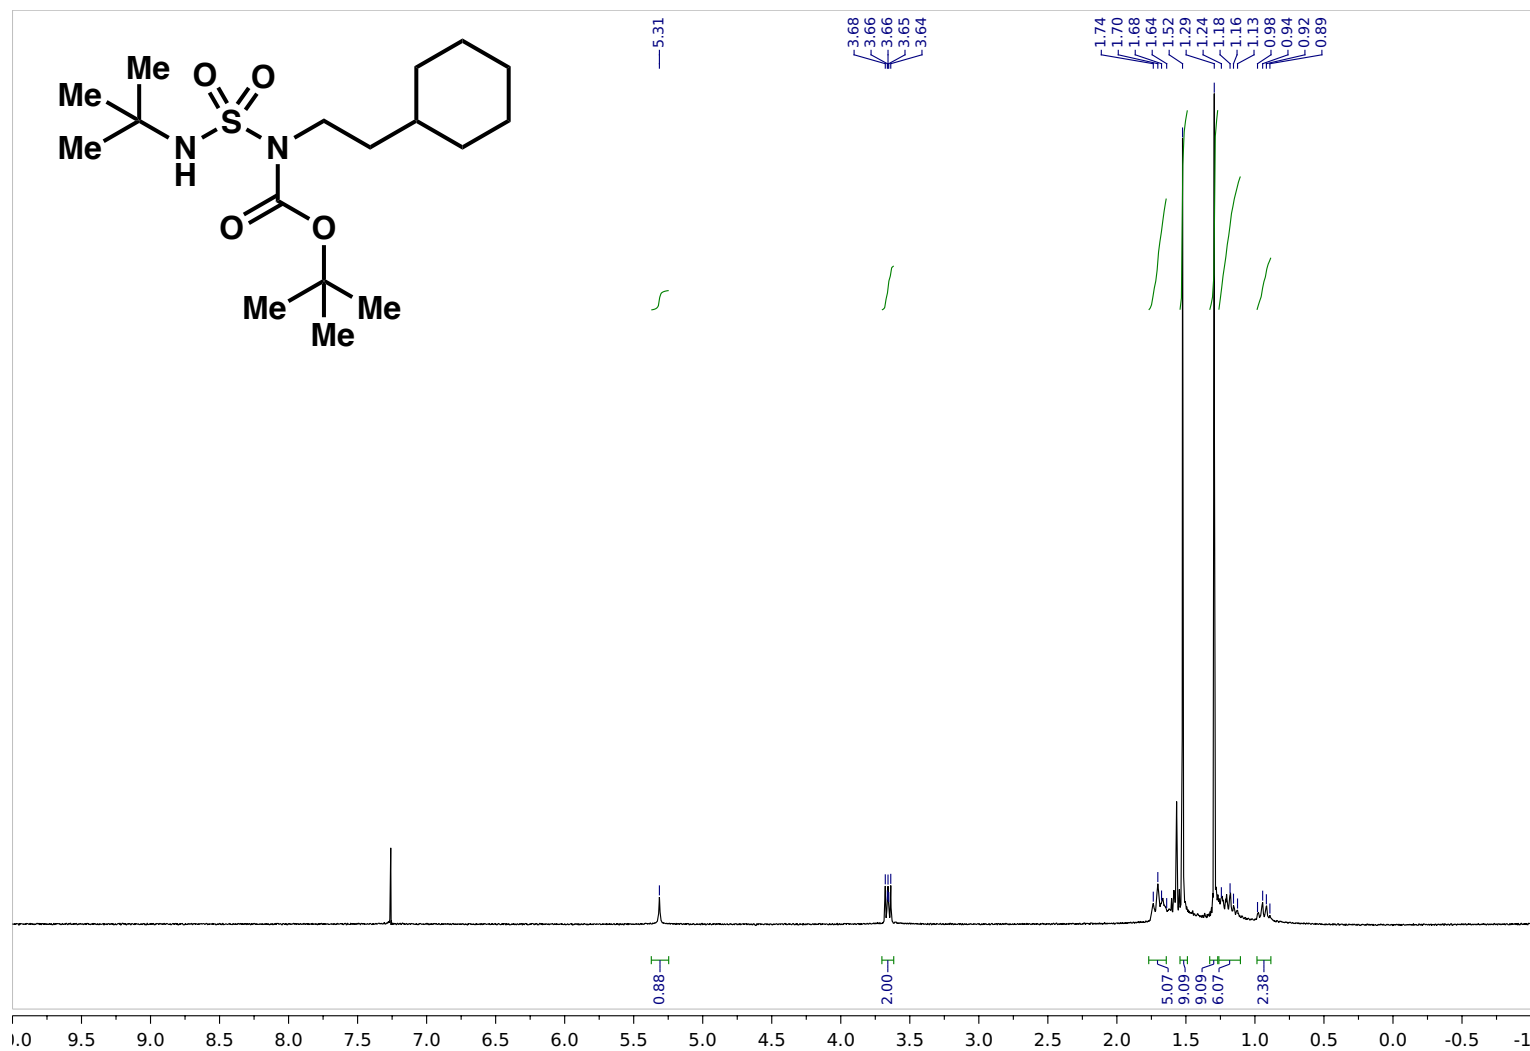

<sup>1</sup>H NMR (400 MHz, CDCl<sub>3</sub>) for *N*-tert-butoxycarbonyl-*N'*-tert-butyl-*N*-(2-(cyclohexyl)ethyl)sulfamide (S8e)

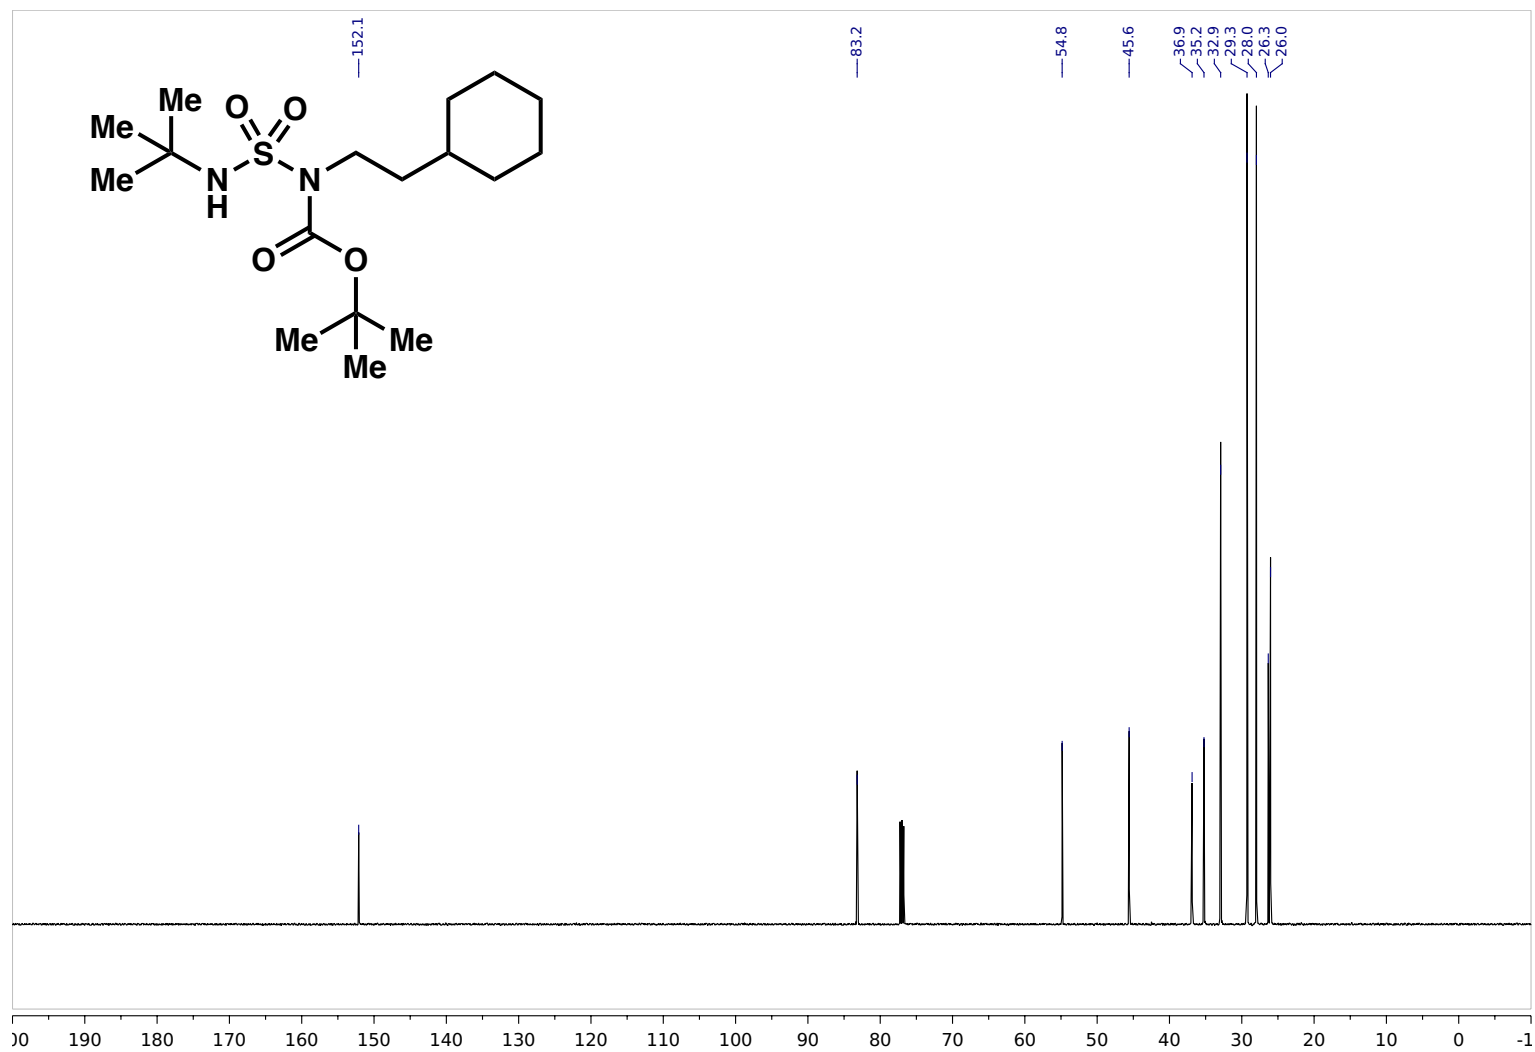

<sup>13</sup>C NMR (126 MHz, CDCl<sub>3</sub>) for *N*-*tert*-butoxycarbonyl-*N'*-*tert*-butyl-*N*-(2-(cyclohexyl)ethyl)sulfamide (S8e)

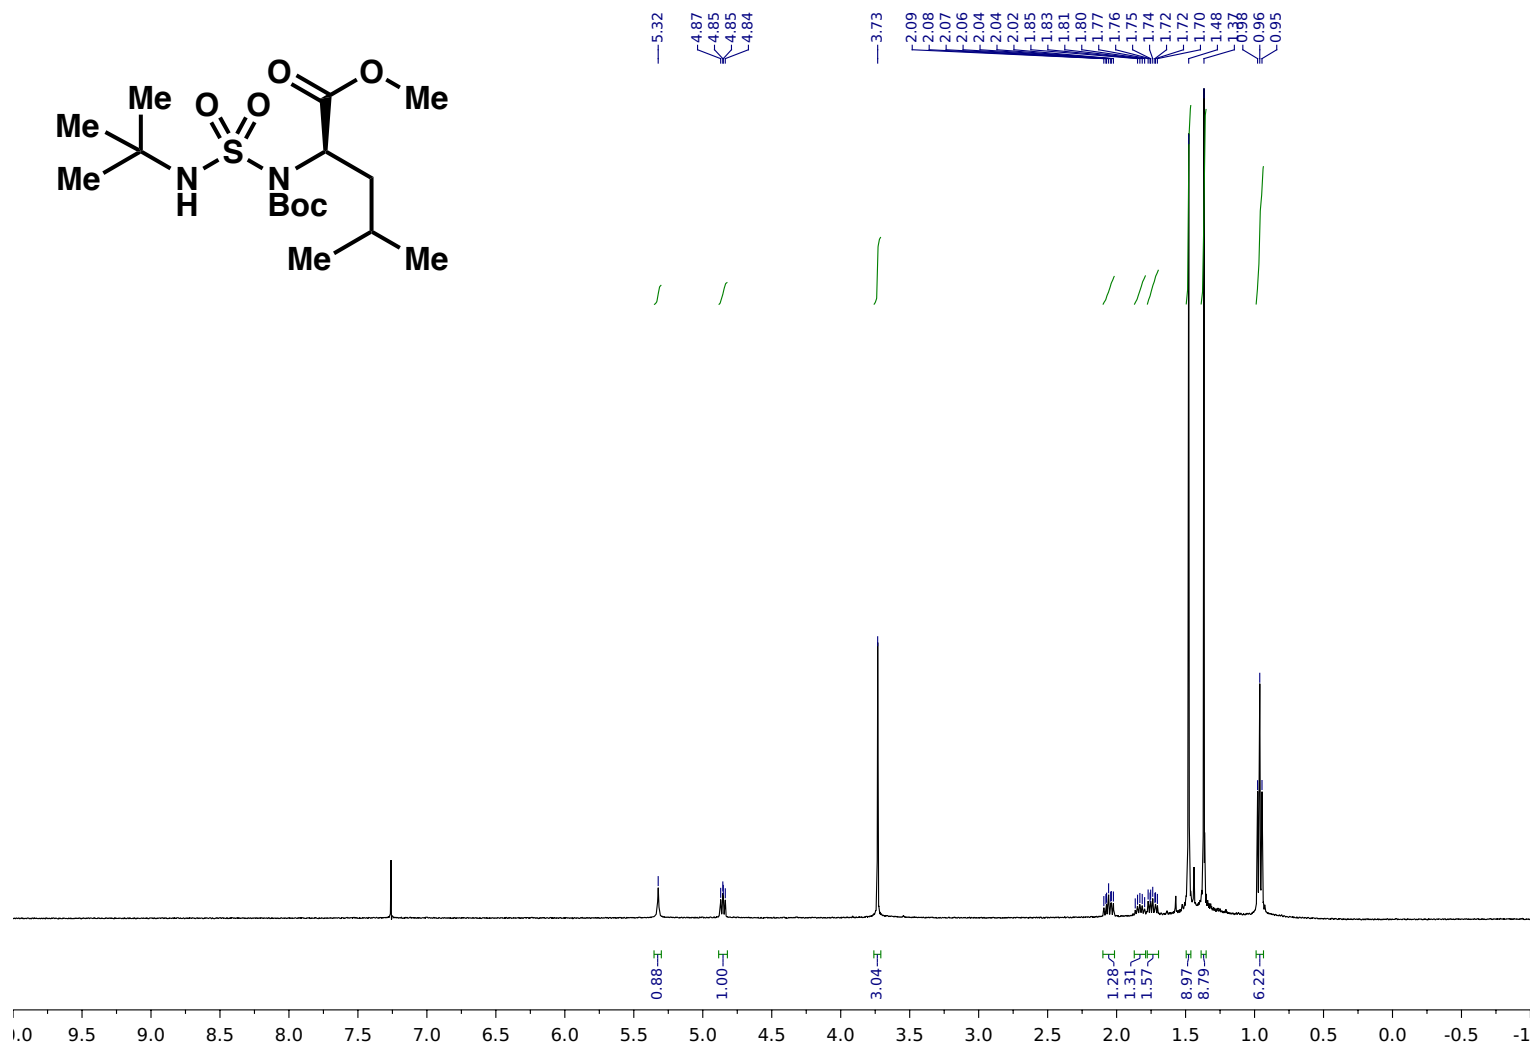

<sup>1</sup>H NMR (400 MHz, CDCl<sub>3</sub>) for *N*-*tert*-butoxycarbonyl-*N'*-*tert*-butyl-*N*-((2*R*)-methyl 4-methylpentano-2-yl)sulfamide (**S8f**)

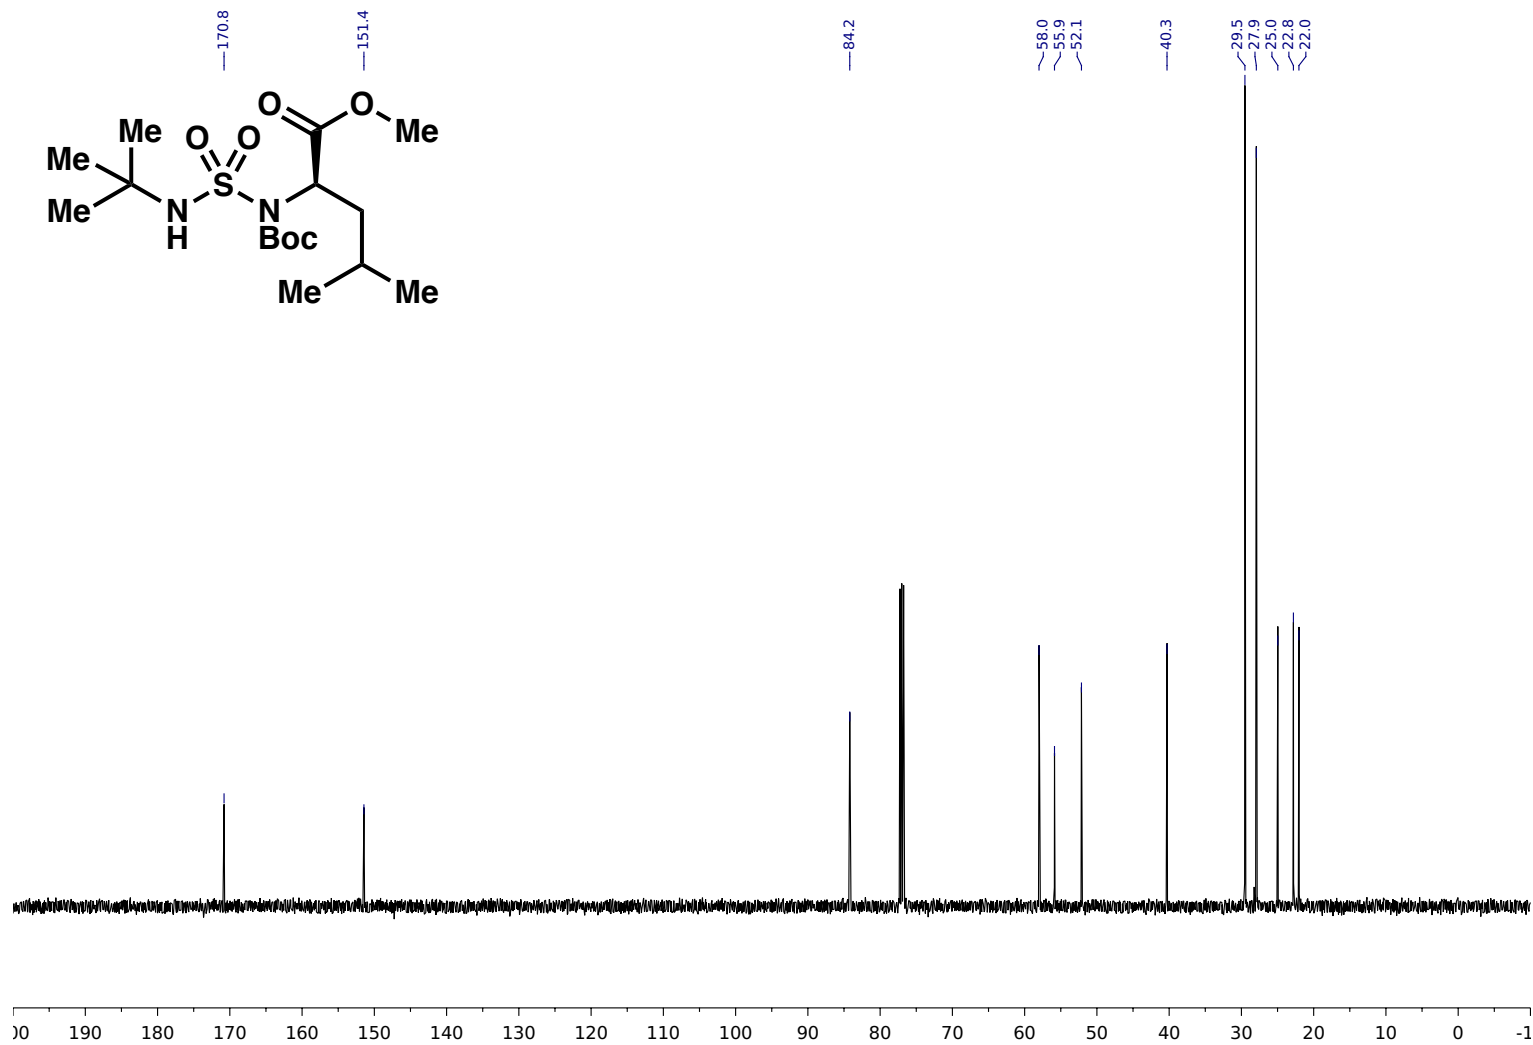

<sup>13</sup>C NMR (126 MHz, CDCl<sub>3</sub>) for *N*-*tert*-butoxycarbonyl-*N'*-*tert*-butyl-*N*-((2*R*)-methyl 4-methylpentano-2-yl)sulfamide (**S8f**)

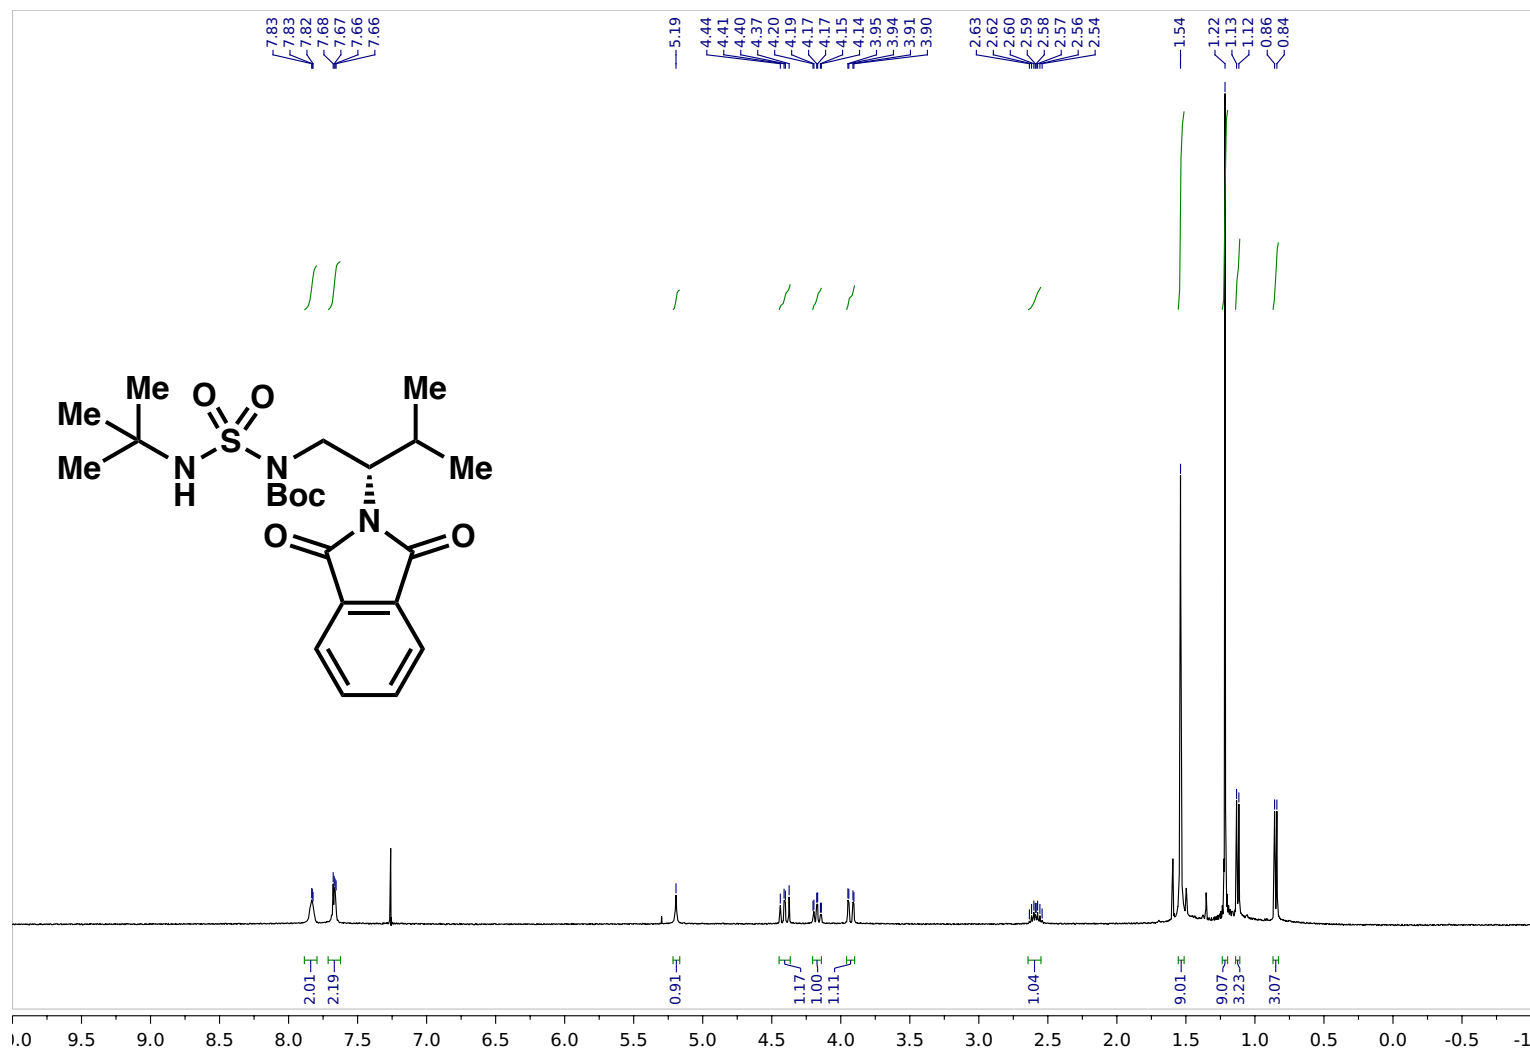

$^1\text{H}$  NMR (400 MHz,  $\text{CDCl}_3$ ) for *N-tert-butoxycarbonyl-N'-tert-butyl-N-((S)-2-(1,3-dioxisoindolin-2-yl)-3-methylbutyl)sulfamide* (S8g)

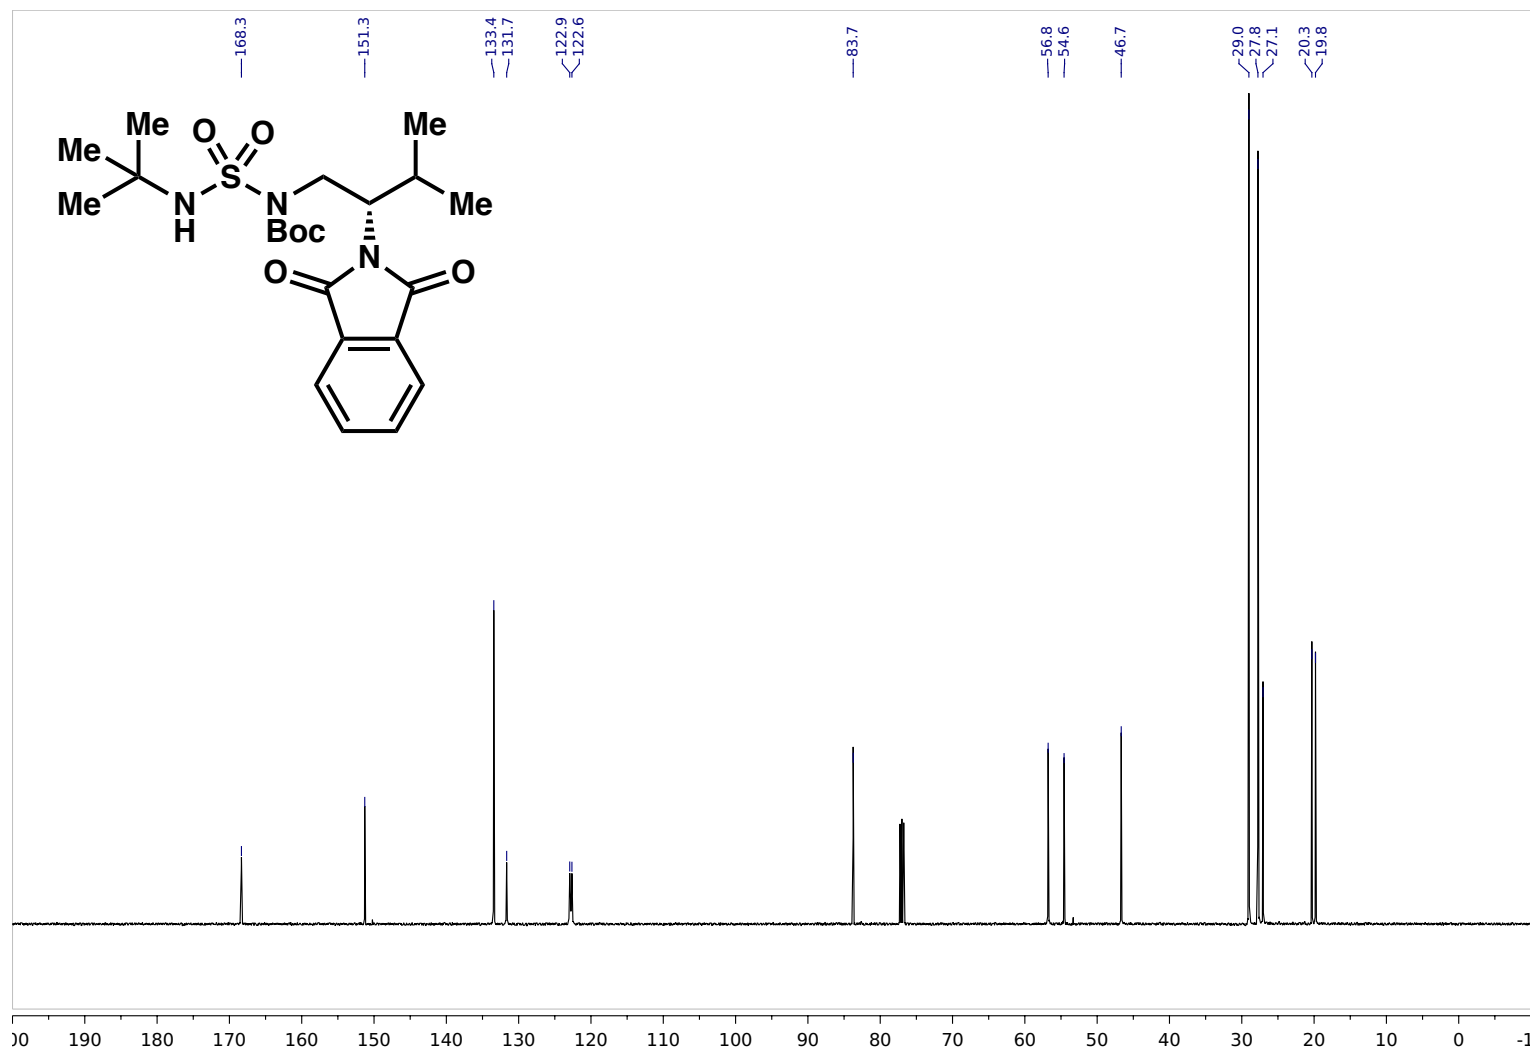

<sup>13</sup>C NMR (126 MHz, CDCl<sub>3</sub>) for *N*-tert-butoxycarbonyl-*N'*-tert-butyl-*N*-((*S*)-2-(1,3-dioxisoindolin-2-yl)-3-methylbutyl)sulfamide (**S8g**)

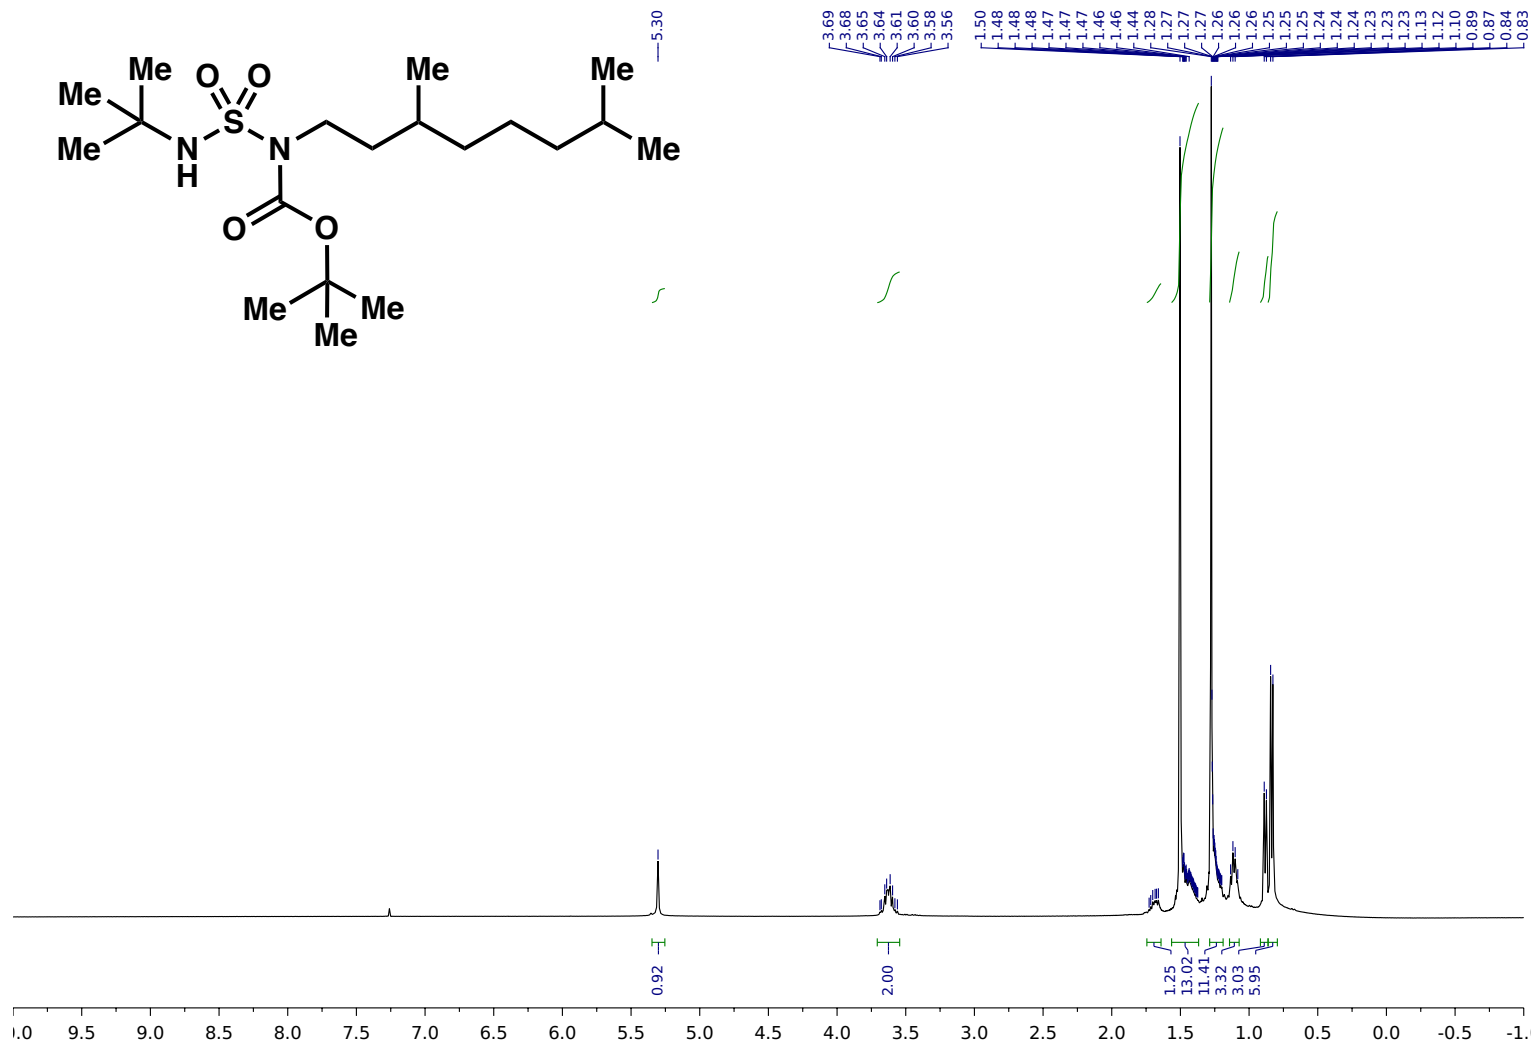

<sup>1</sup>H NMR (400 MHz, CDCl<sub>3</sub>) for *N*-*tert*-butoxycarbonyl-*N'*-*tert*-butyl-*N*-(3,7-dimethyloct-1-yl)sulfamide (**S8h**)

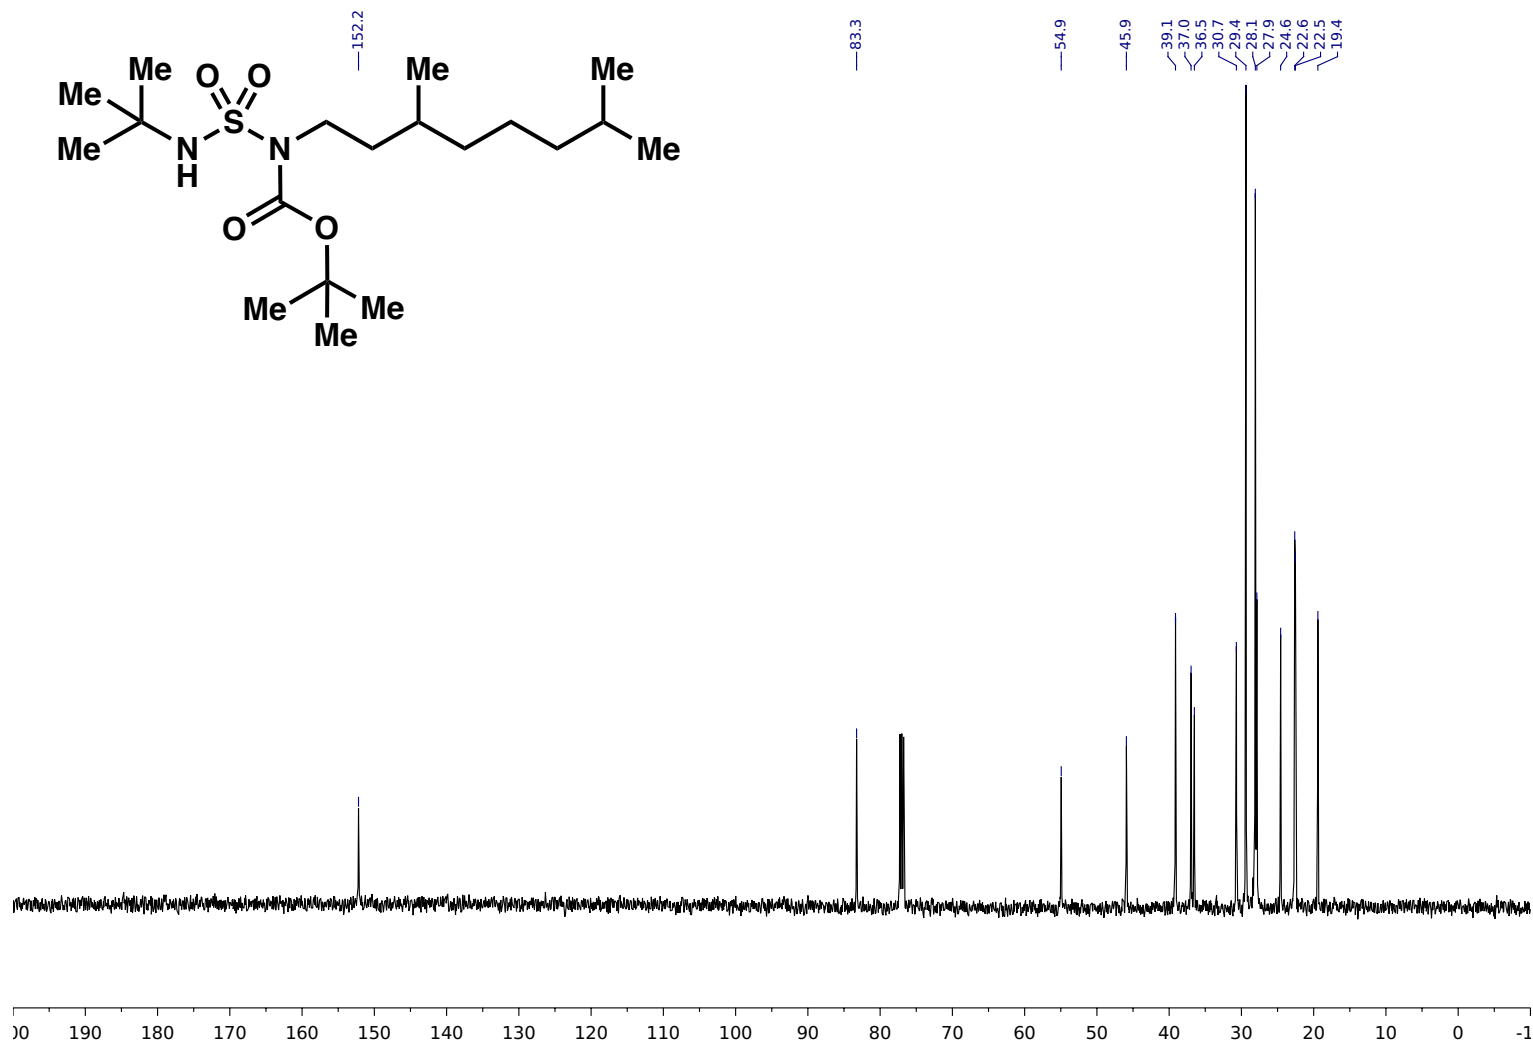



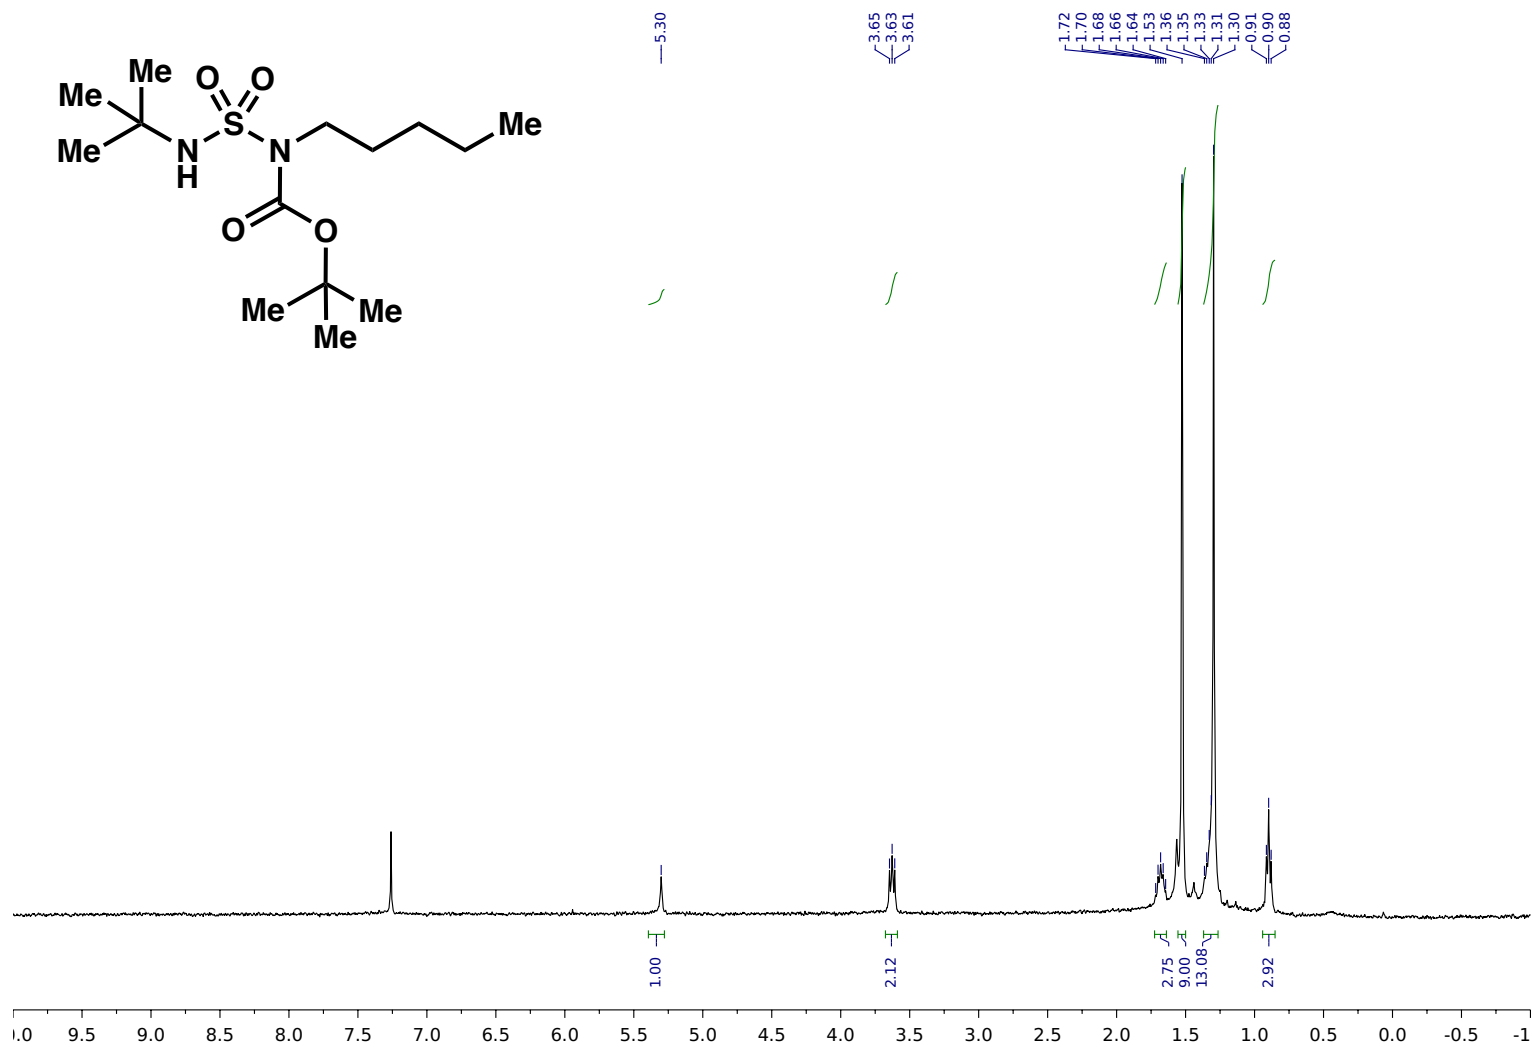

<sup>1</sup>H NMR (400 MHz, CDCl<sub>3</sub>) for *N*-*tert*-butoxycarbonyl-*N'*-*tert*-butyl-*N*-pentylsulfamide (**S8i**)

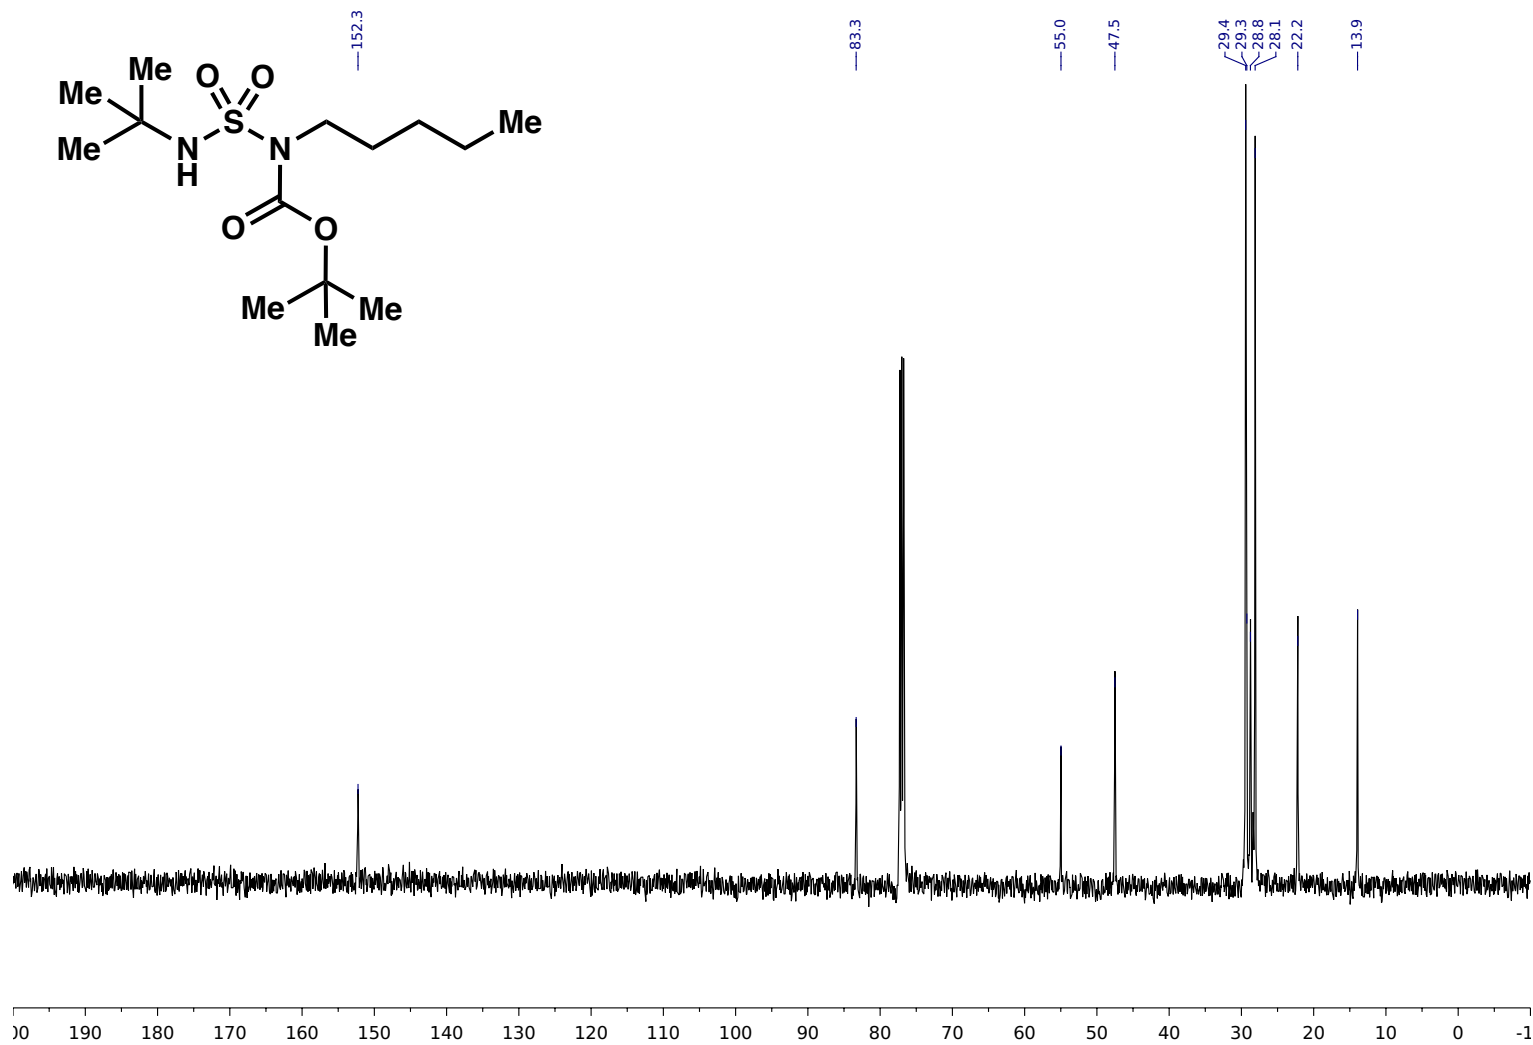

<sup>13</sup>C NMR (126 MHz, CDCl<sub>3</sub>) for *N*-*tert*-butoxycarbonyl-*N'*-*tert*-butyl-*N*-pentylsulfamide (S8i)

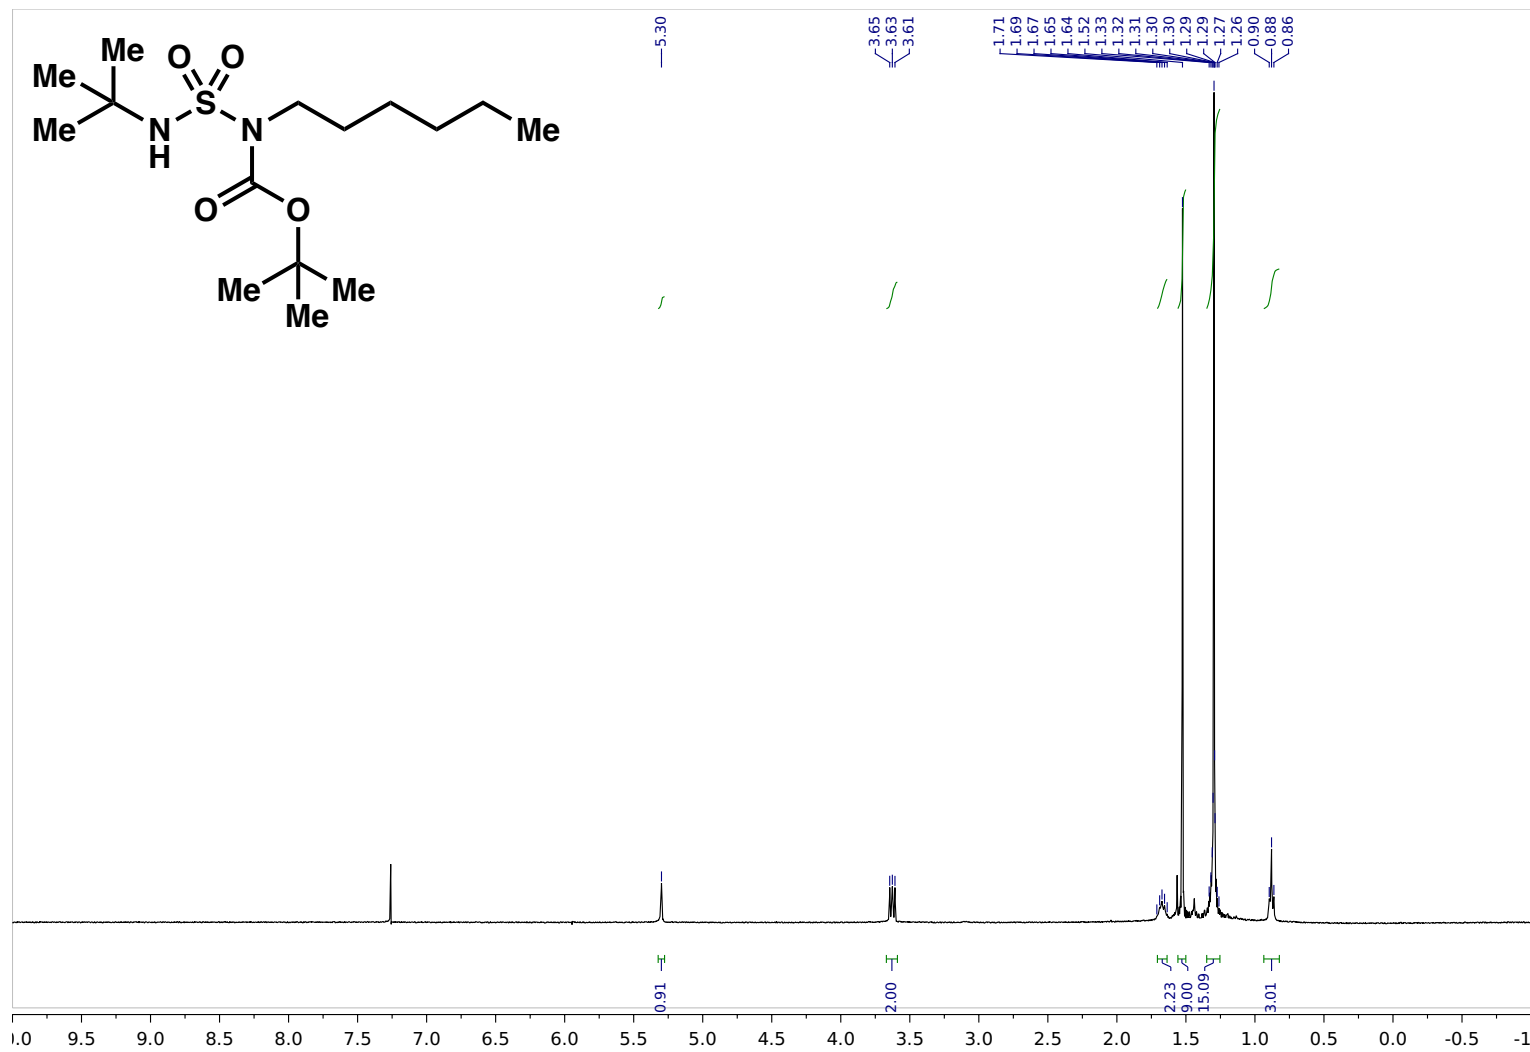

<sup>1</sup>H NMR (400 MHz, CDCl<sub>3</sub>) for *N*-*tert*-butoxycarbonyl-*N'*-*tert*-butyl-*N*-hexylsulfamide (**S8j**)

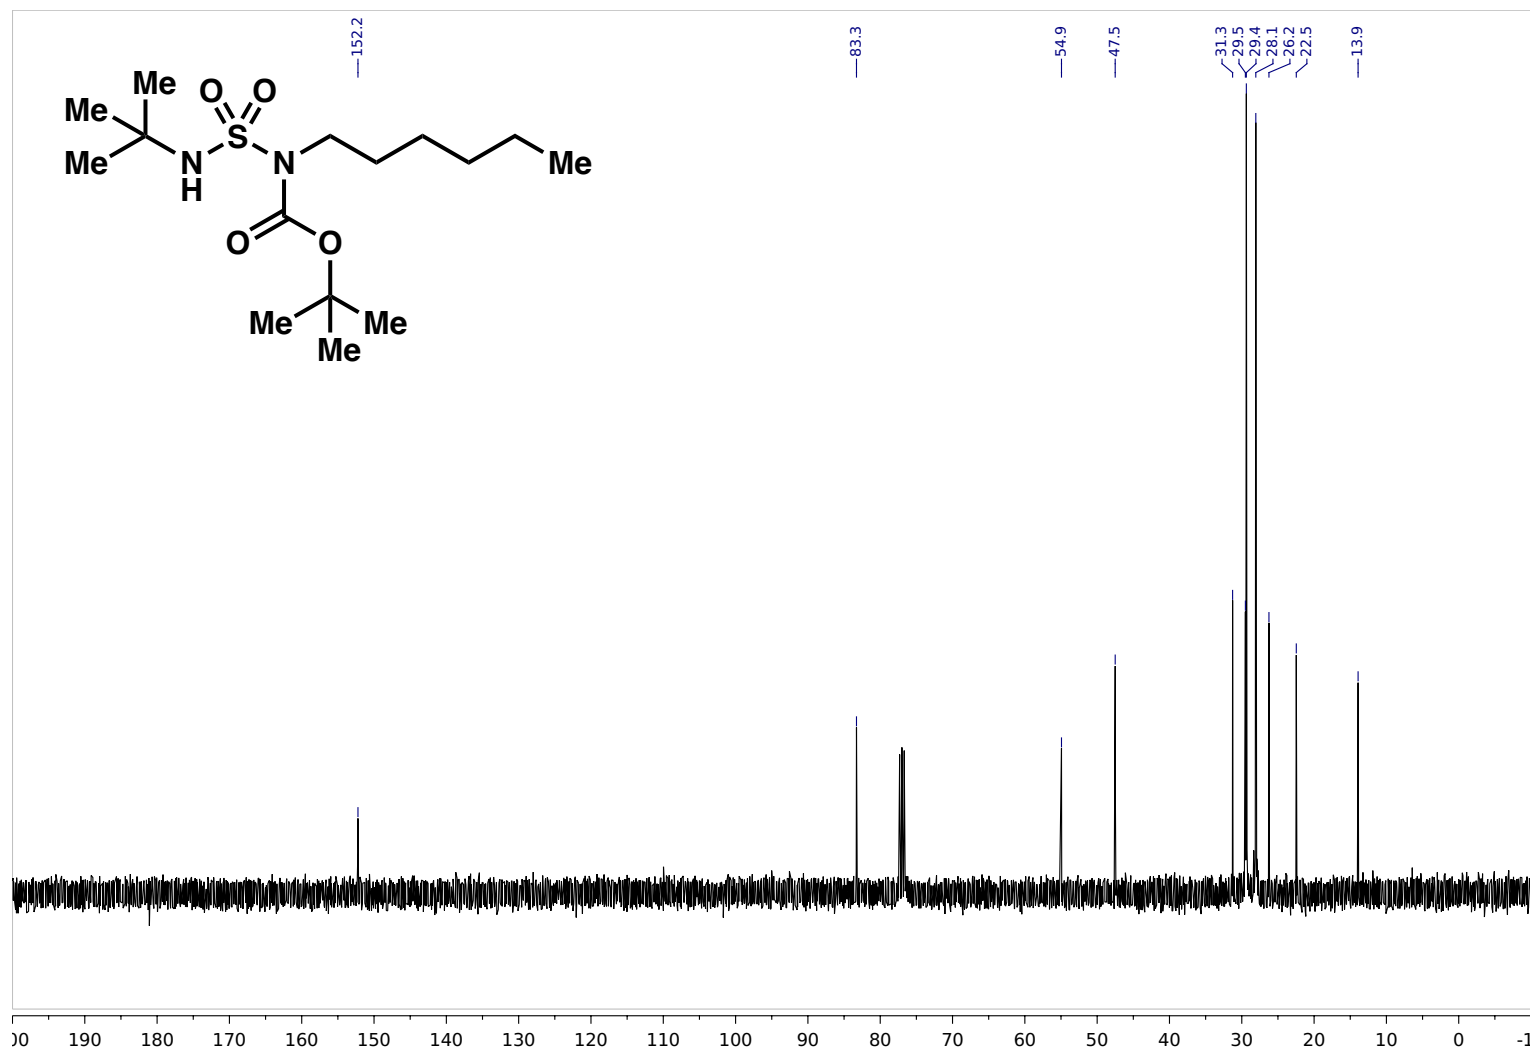

<sup>13</sup>C NMR (101 MHz, CDCl<sub>3</sub>) for *N*-*tert*-butoxycarbonyl-*N'*-*tert*-butyl-*N*-hexylsulfamide (**S8j**)

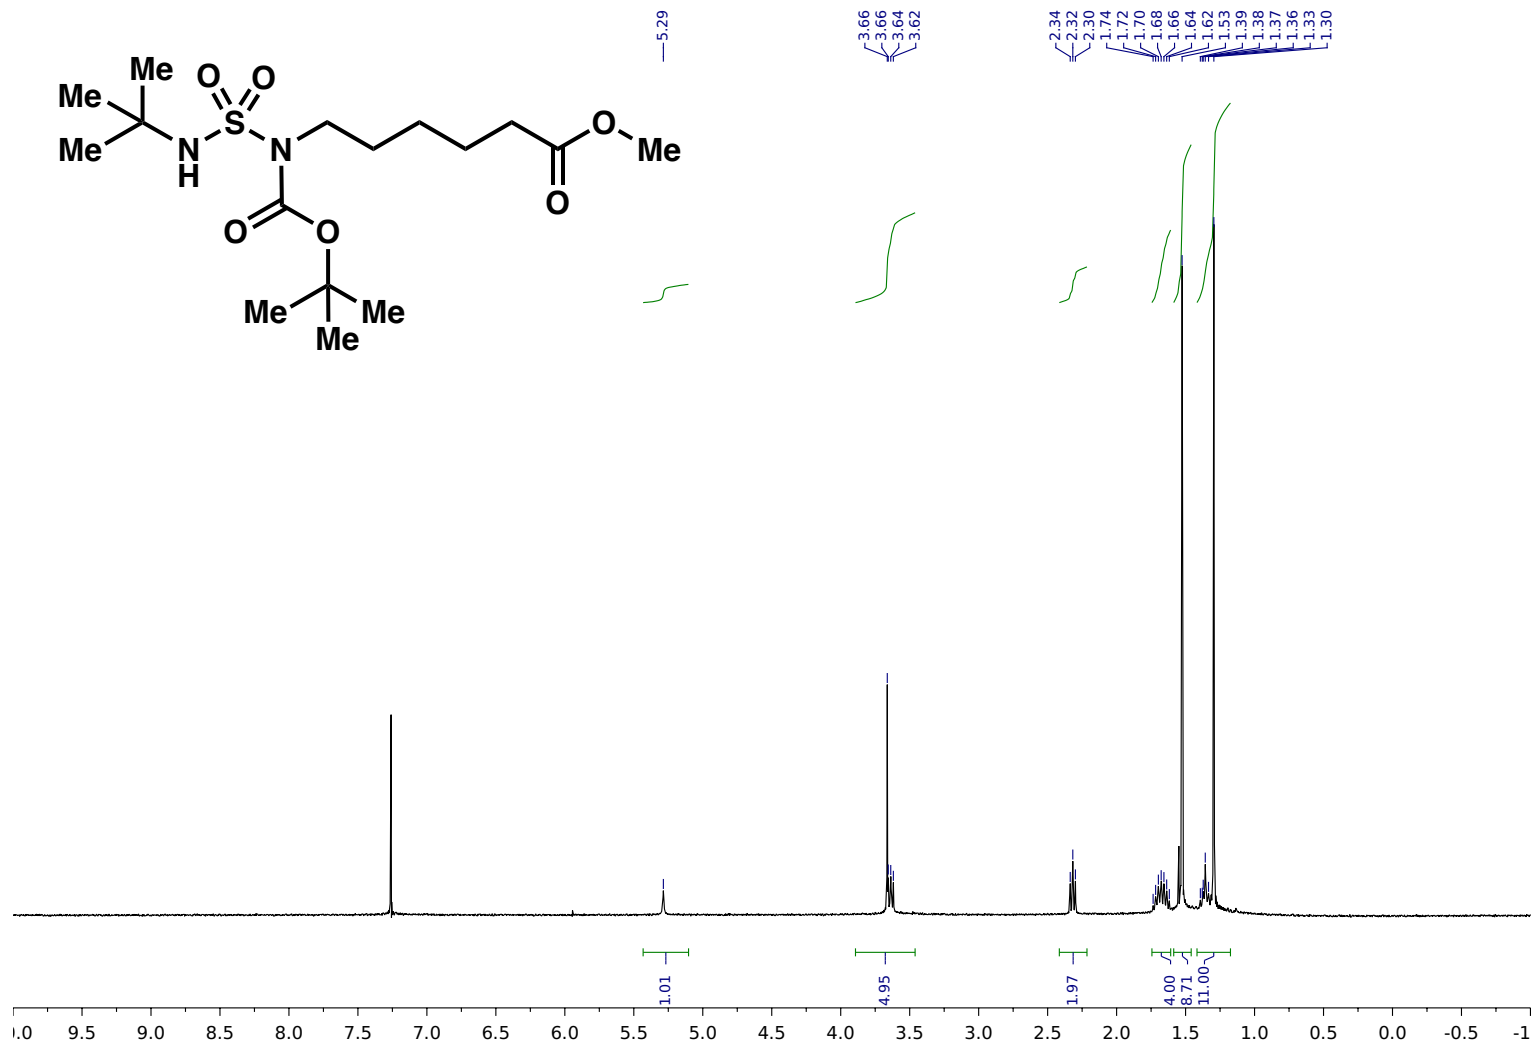

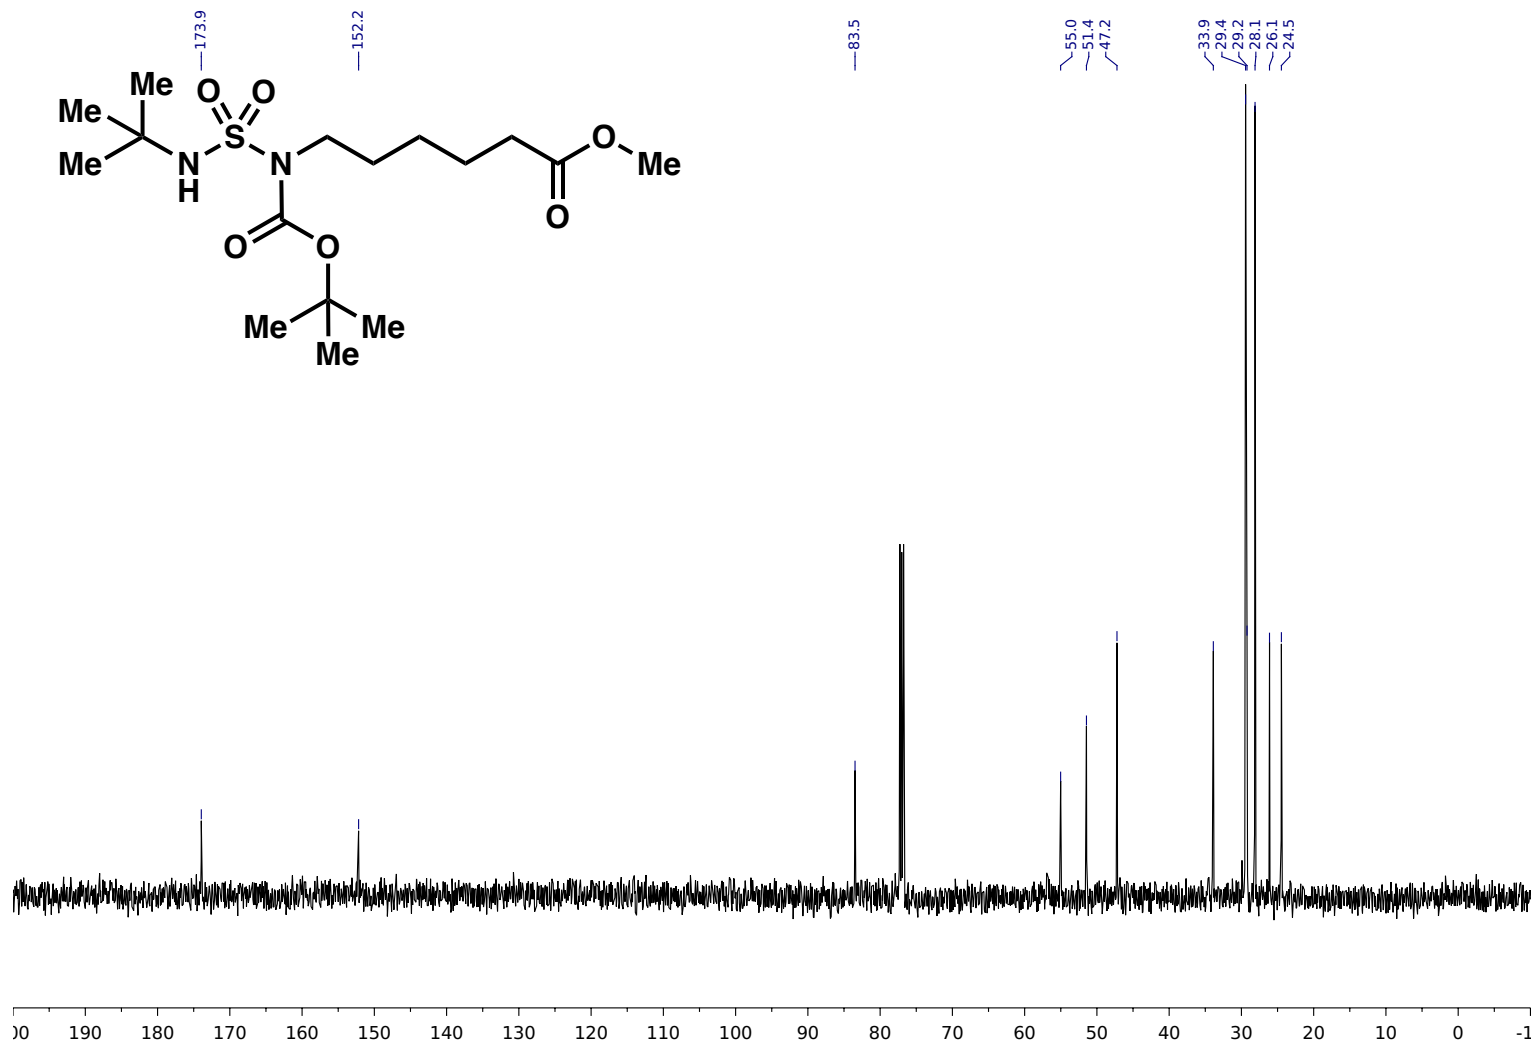

<sup>13</sup>C NMR (126 MHz, CDCl<sub>3</sub>) for *N*-*tert*-butyloxycarbonyl-*N'*-*tert*-butyl-*N*-(methyl hexano-6-yl)sulfamide (**S8k**)

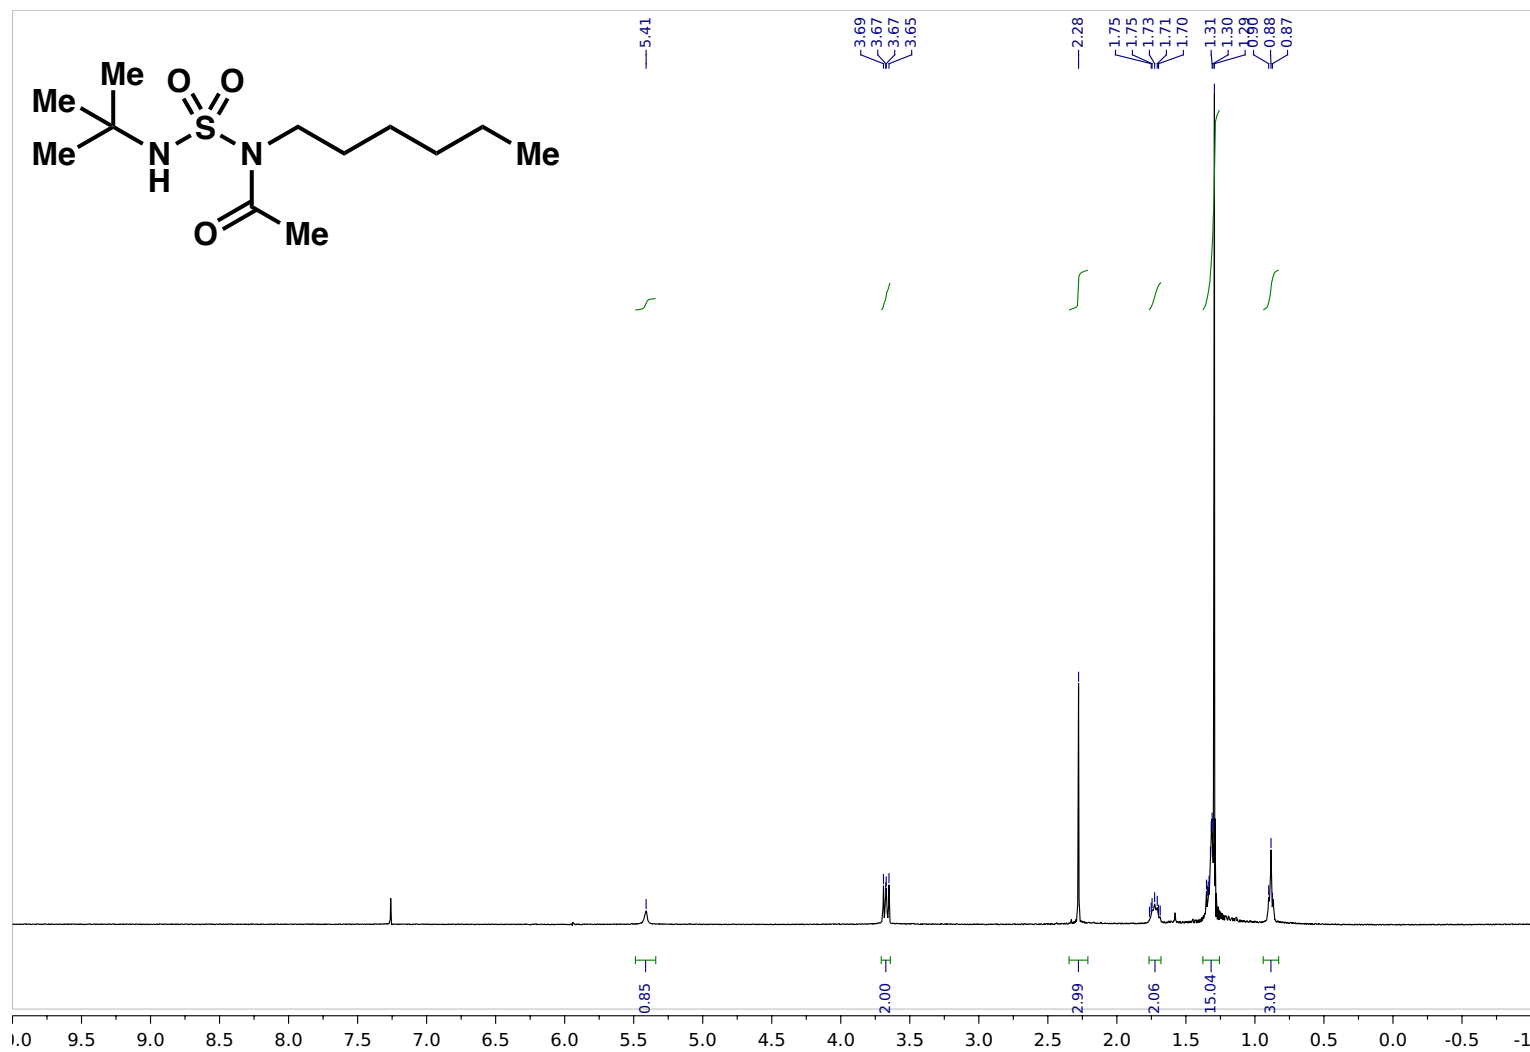

<sup>1</sup>H NMR (400 MHz, CDCl<sub>3</sub>) for *N*-acetyl-*N'*-*tert*-butyl-*N*-hexylsulfamide (S81)

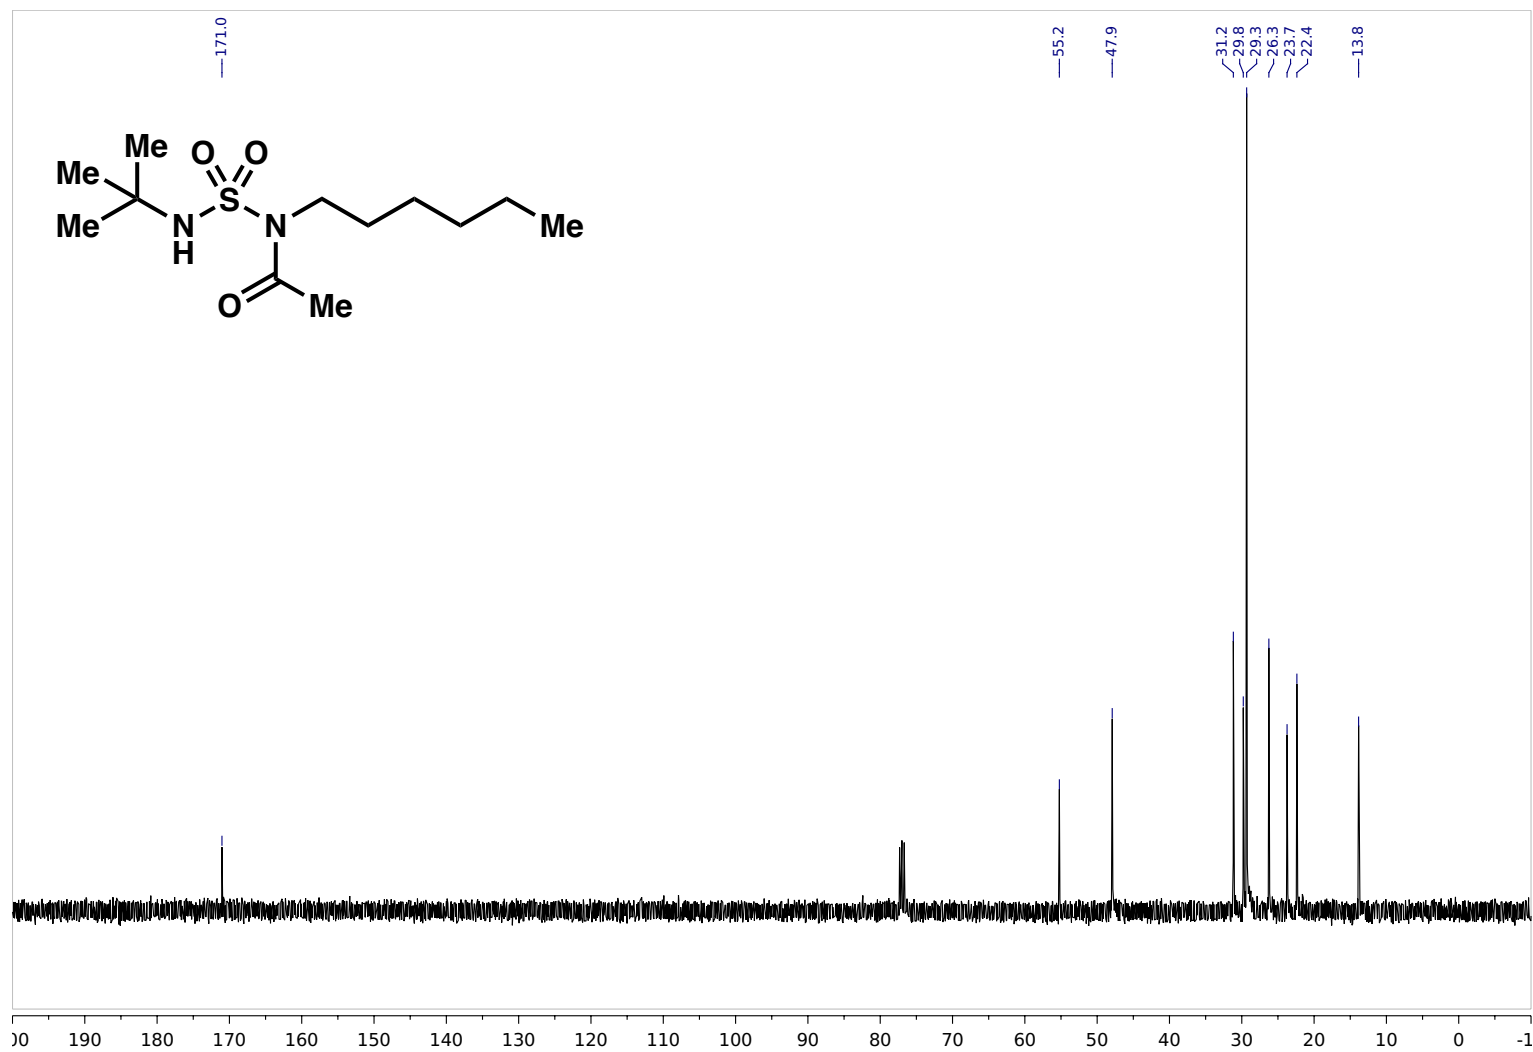

<sup>13</sup>C NMR (101 MHz, CDCl<sub>3</sub>) for *N*-acetyl-*N'*-*tert*-butyl-*N*-hexylsulfamide (S81)



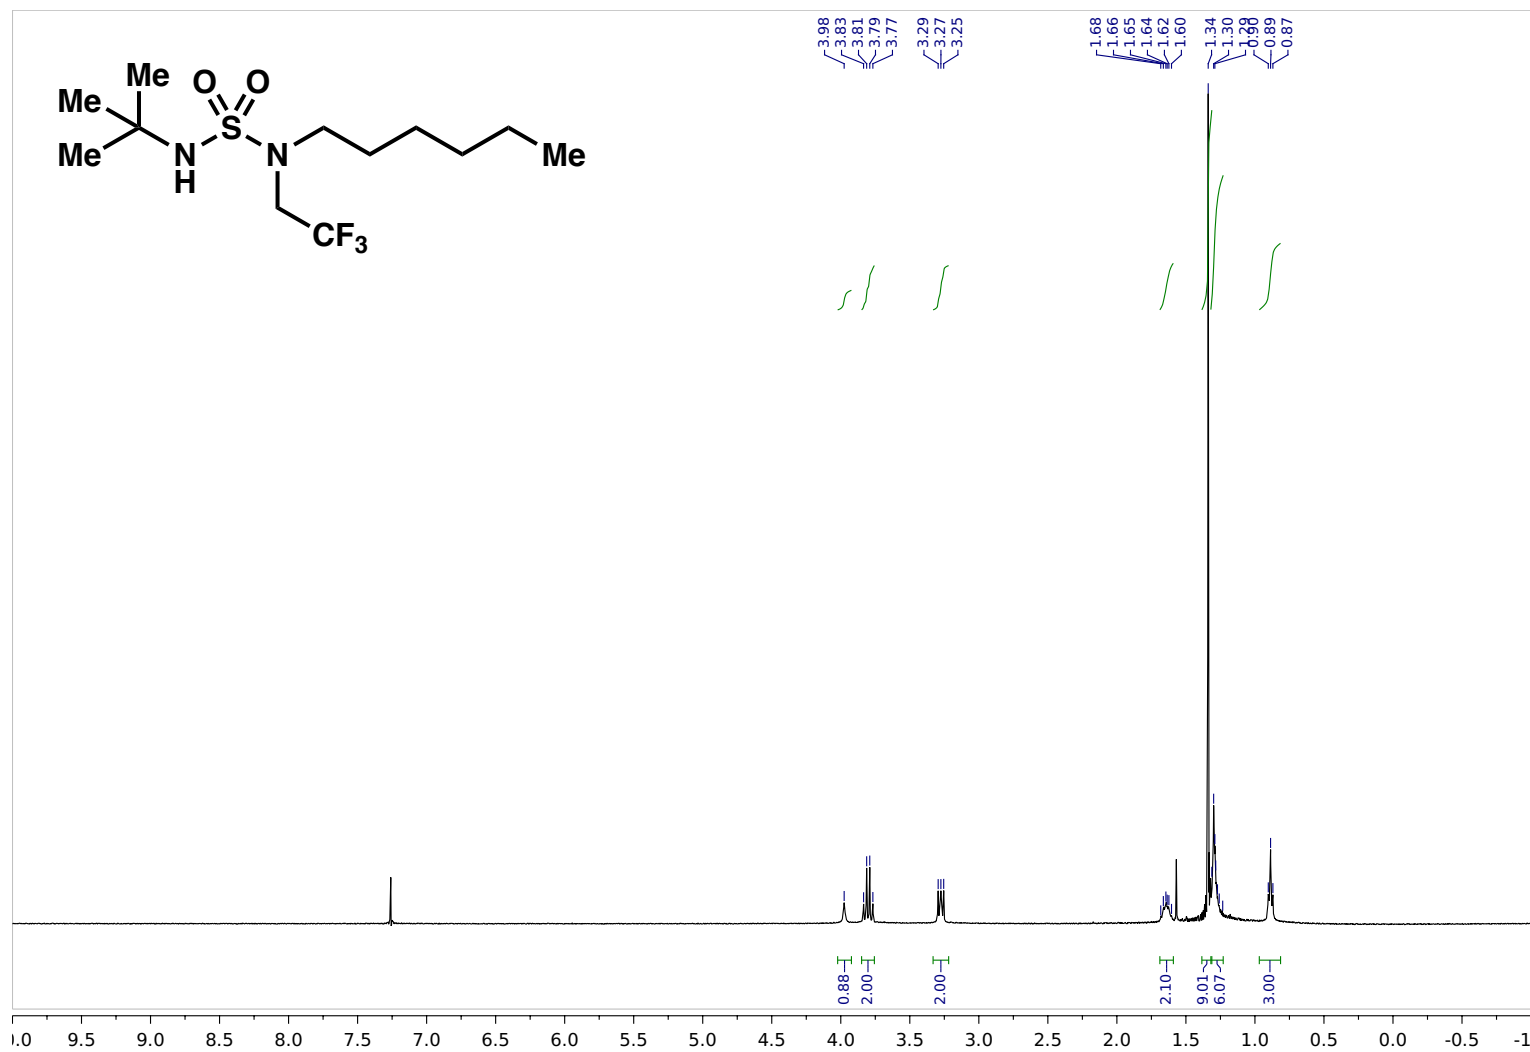

<sup>1</sup>H NMR (400 MHz, CDCl<sub>3</sub>) for *N*-*tert*-butyl-*N'*-hexyl-*N'*-(2,2,2-trifluoroethyl)sulfamide (S8m)

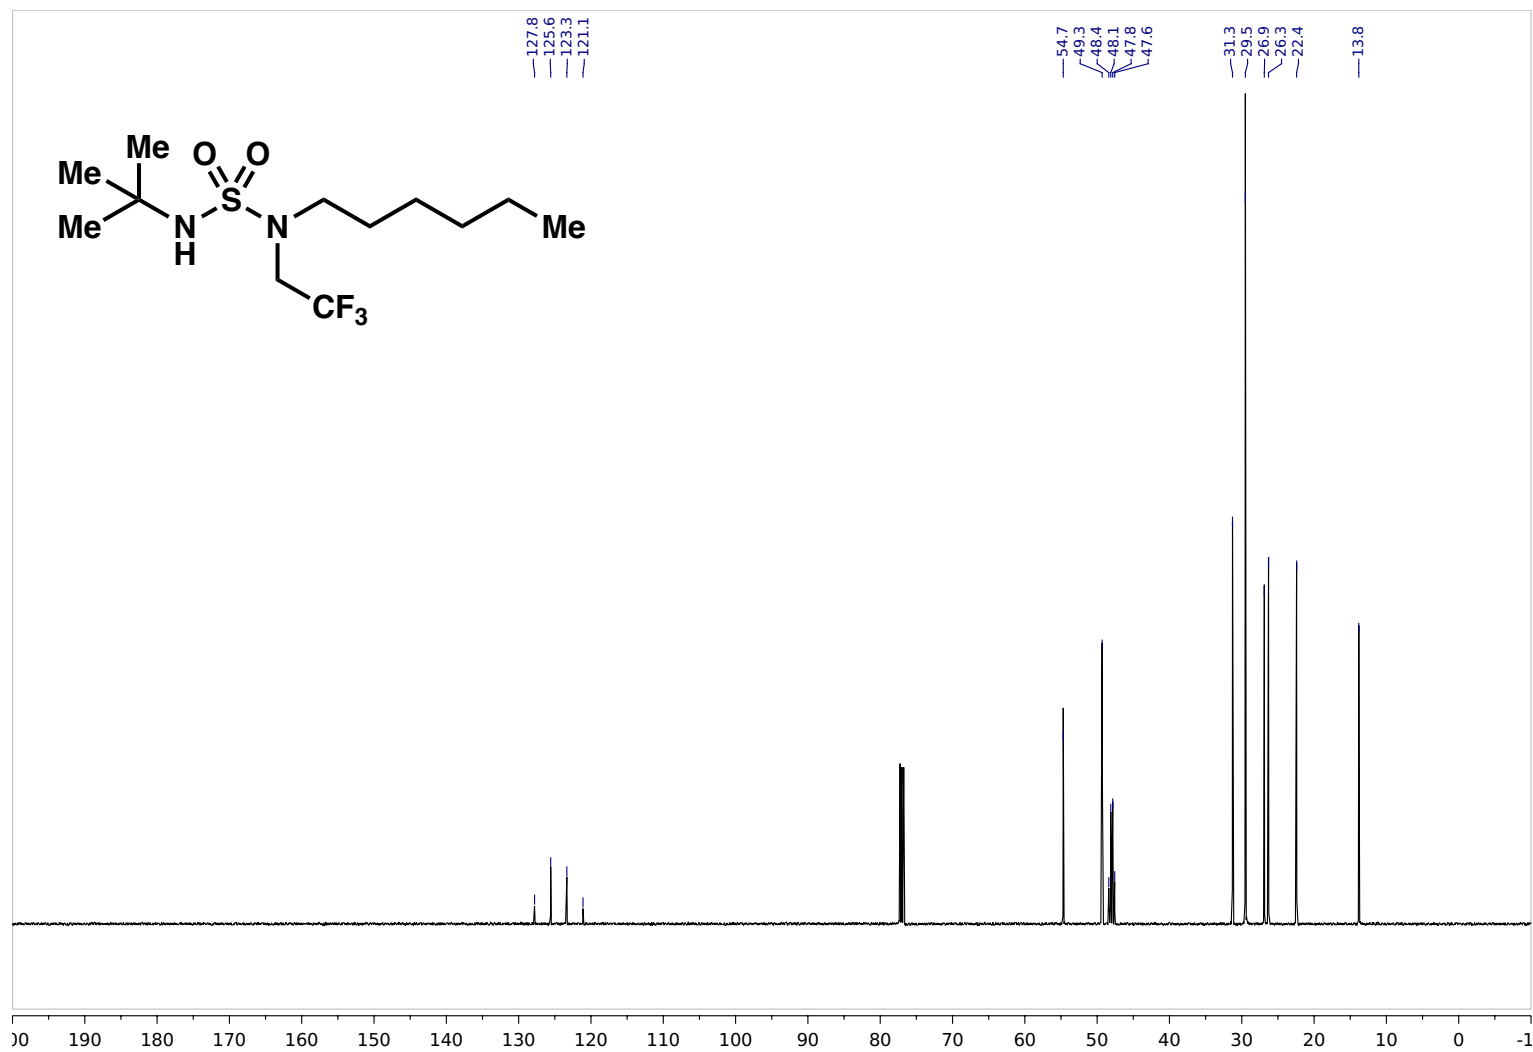

$^{13}\text{C}$  NMR (126 MHz,  $\text{CDCl}_3$ ) for *N*-*tert*-butyl-*N'*-hexyl-*N''*-(2,2,2-trifluoroethyl)sulfamide (**S8m**)

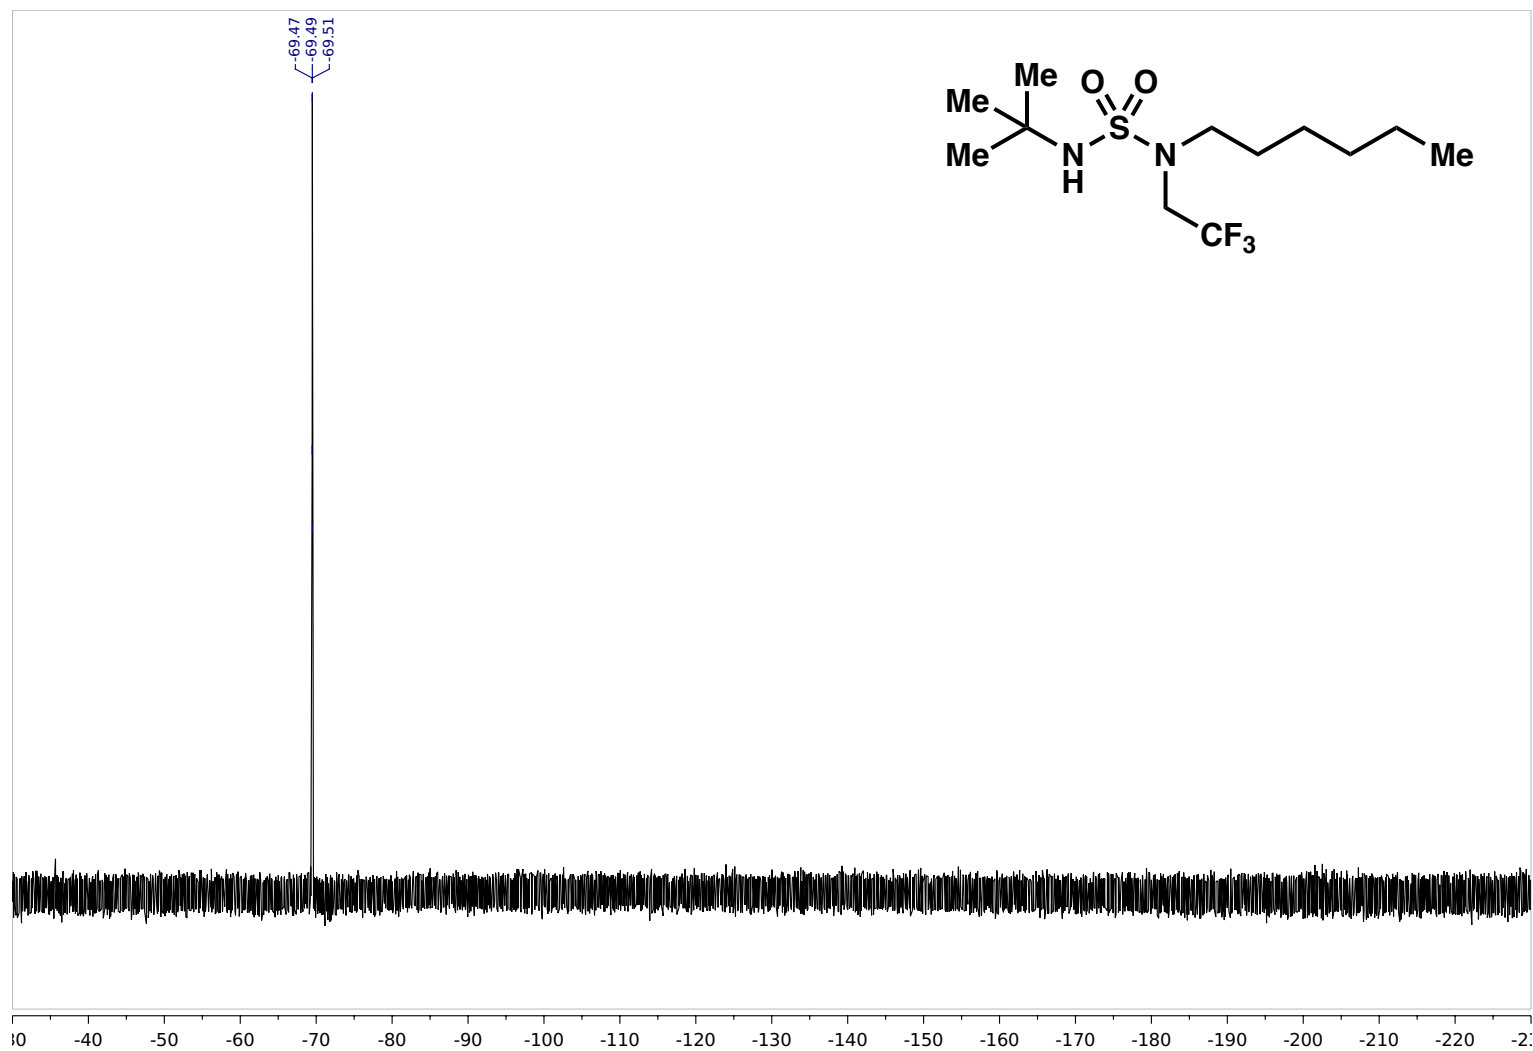

$^{19}\text{F}$  NMR (376 MHz,  $\text{CDCl}_3$ ) for *N*-*tert*-butyl-*N'*-hexyl-*N''*-(2,2,2-trifluoroethyl)sulfamide (S8m)

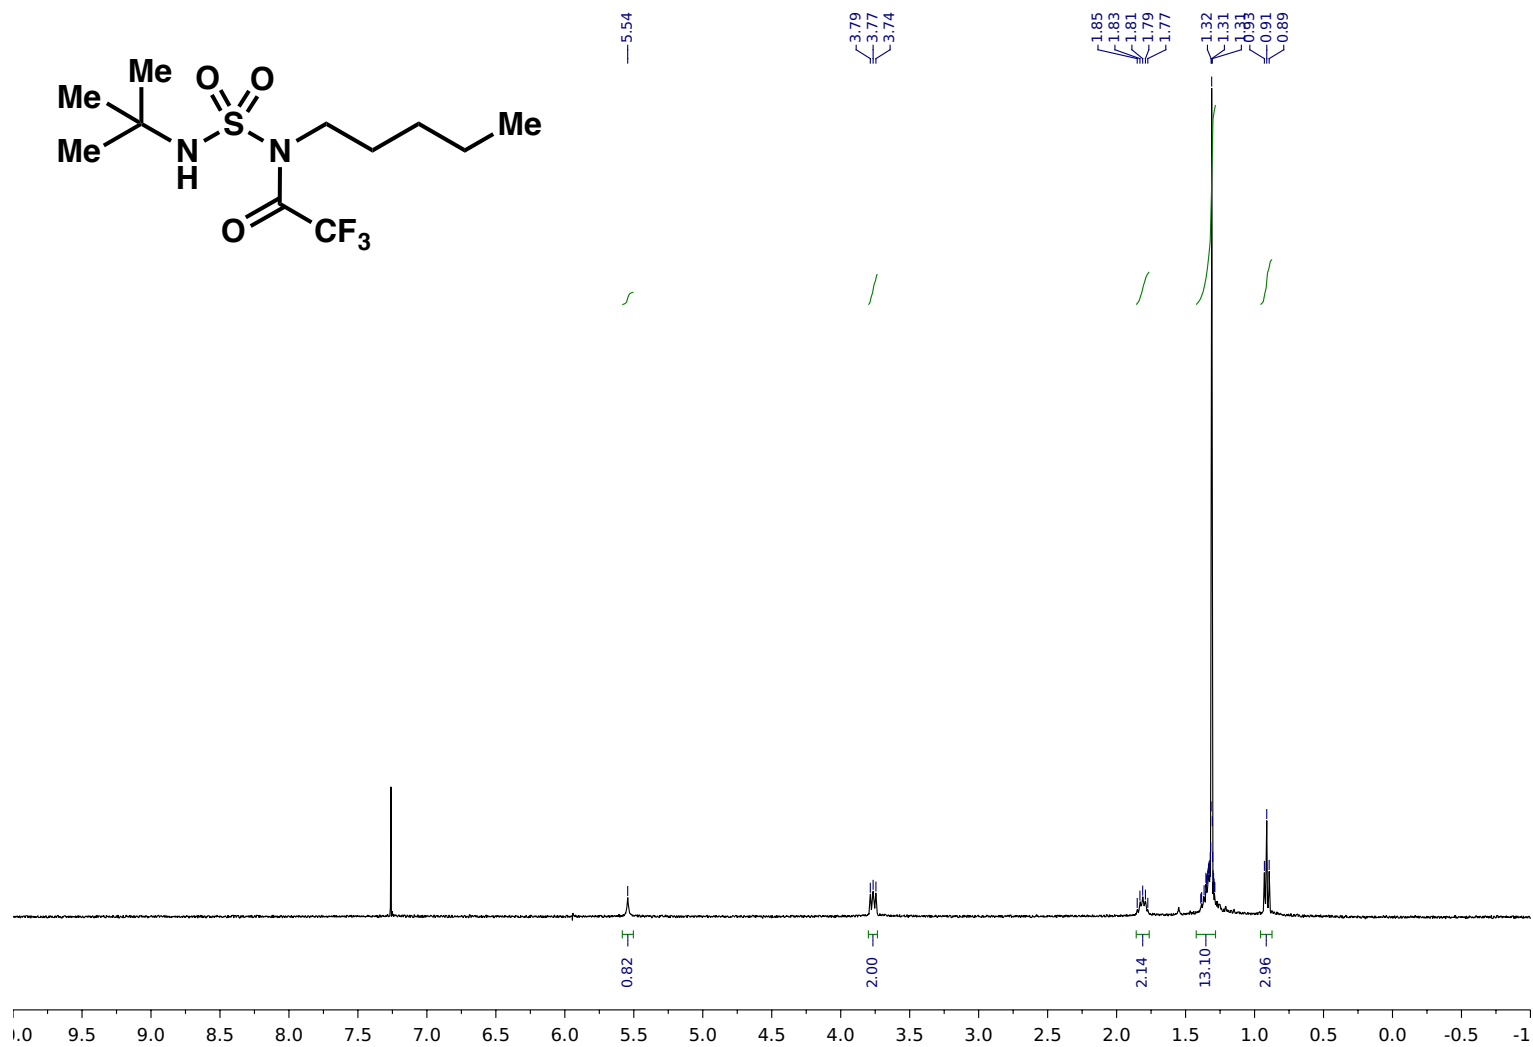

<sup>1</sup>H NMR (400 MHz, CDCl<sub>3</sub>) for *N'*-*tert*-butyl-*N*-trifluoroacetyl-*N*-pentylsulfamide (**S8n**)

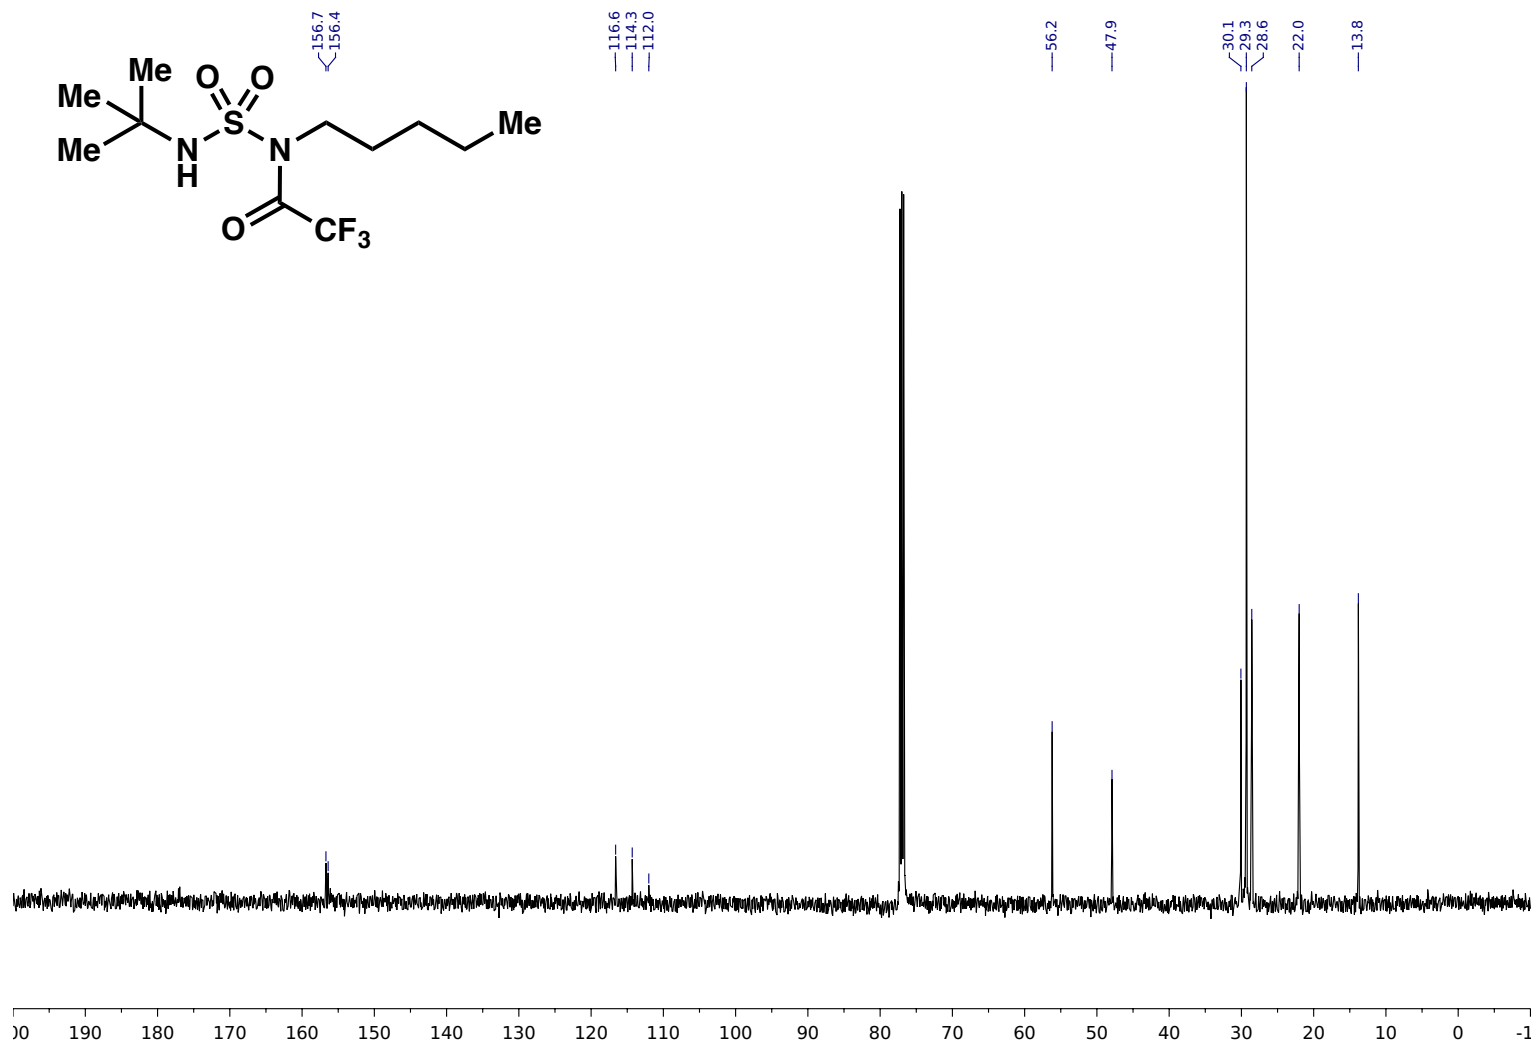

<sup>13</sup>C NMR (126 MHz, CDCl<sub>3</sub>) for *N'*-*tert*-butyl-*N*-trifluoroacetyl-*N*-pentylsulfamide (**S8n**)

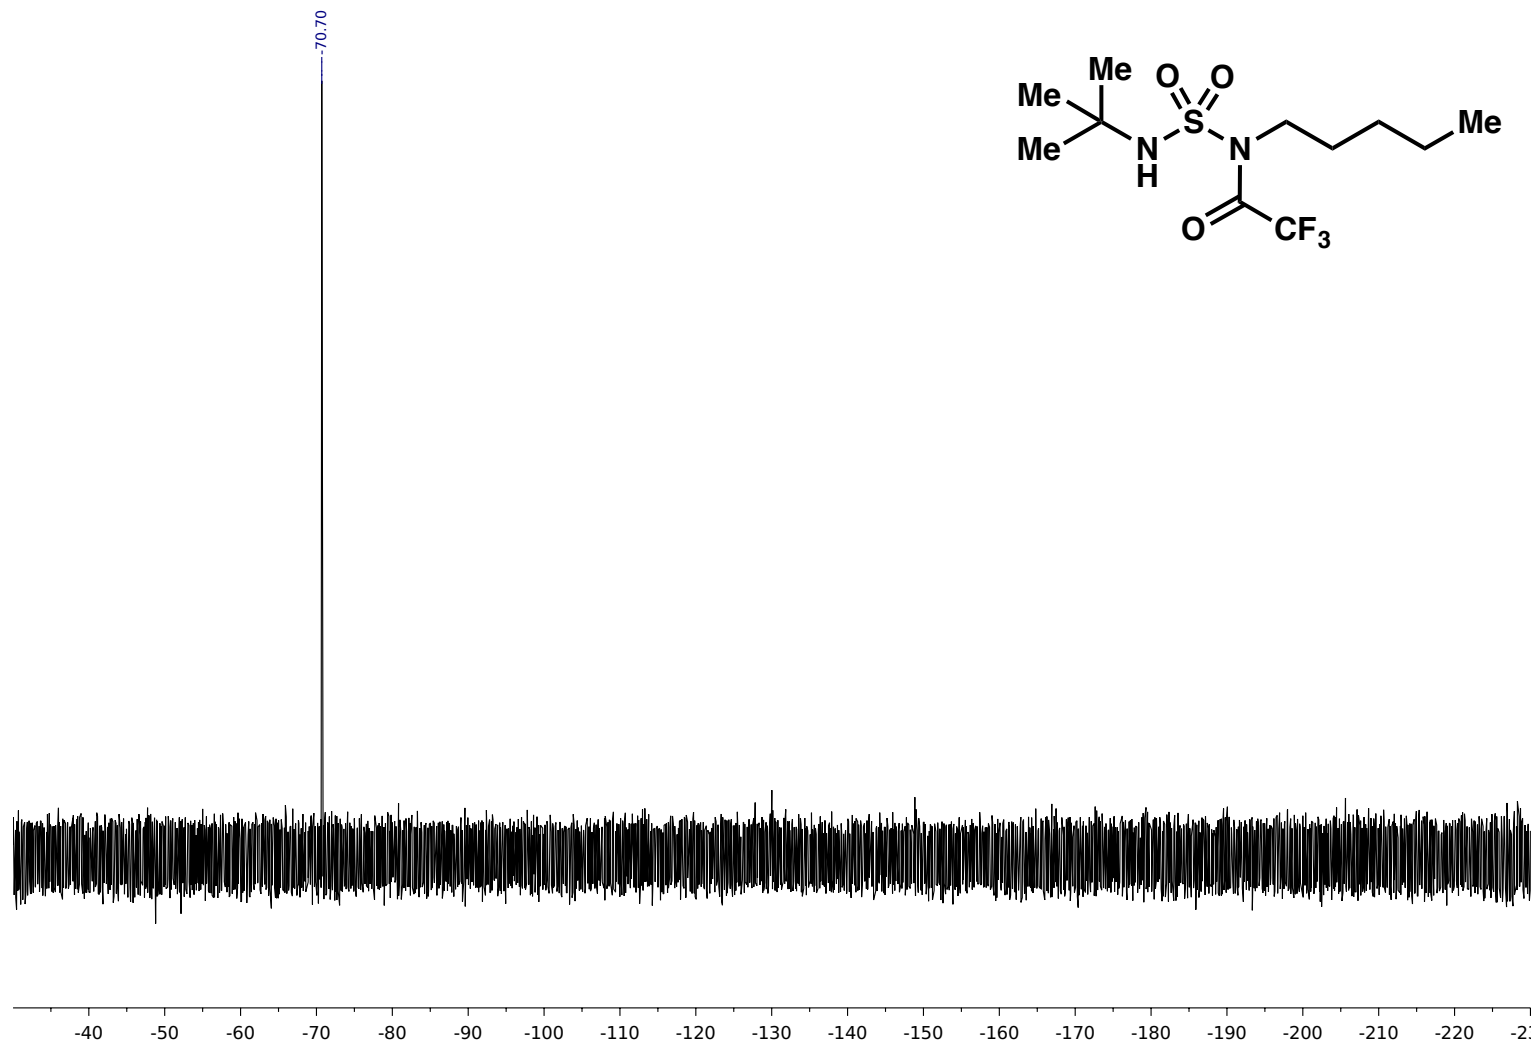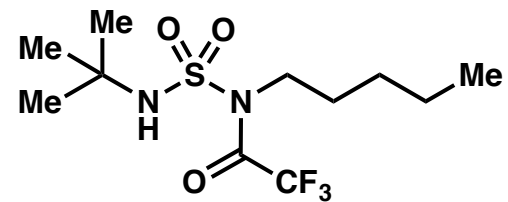

$^{19}\text{F}$  NMR (376 MHz,  $\text{CDCl}_3$ ) for *N'*-*tert*-butyl-*N*-trifluoroacetyl-*N*-pentylsulfamide (S8n)

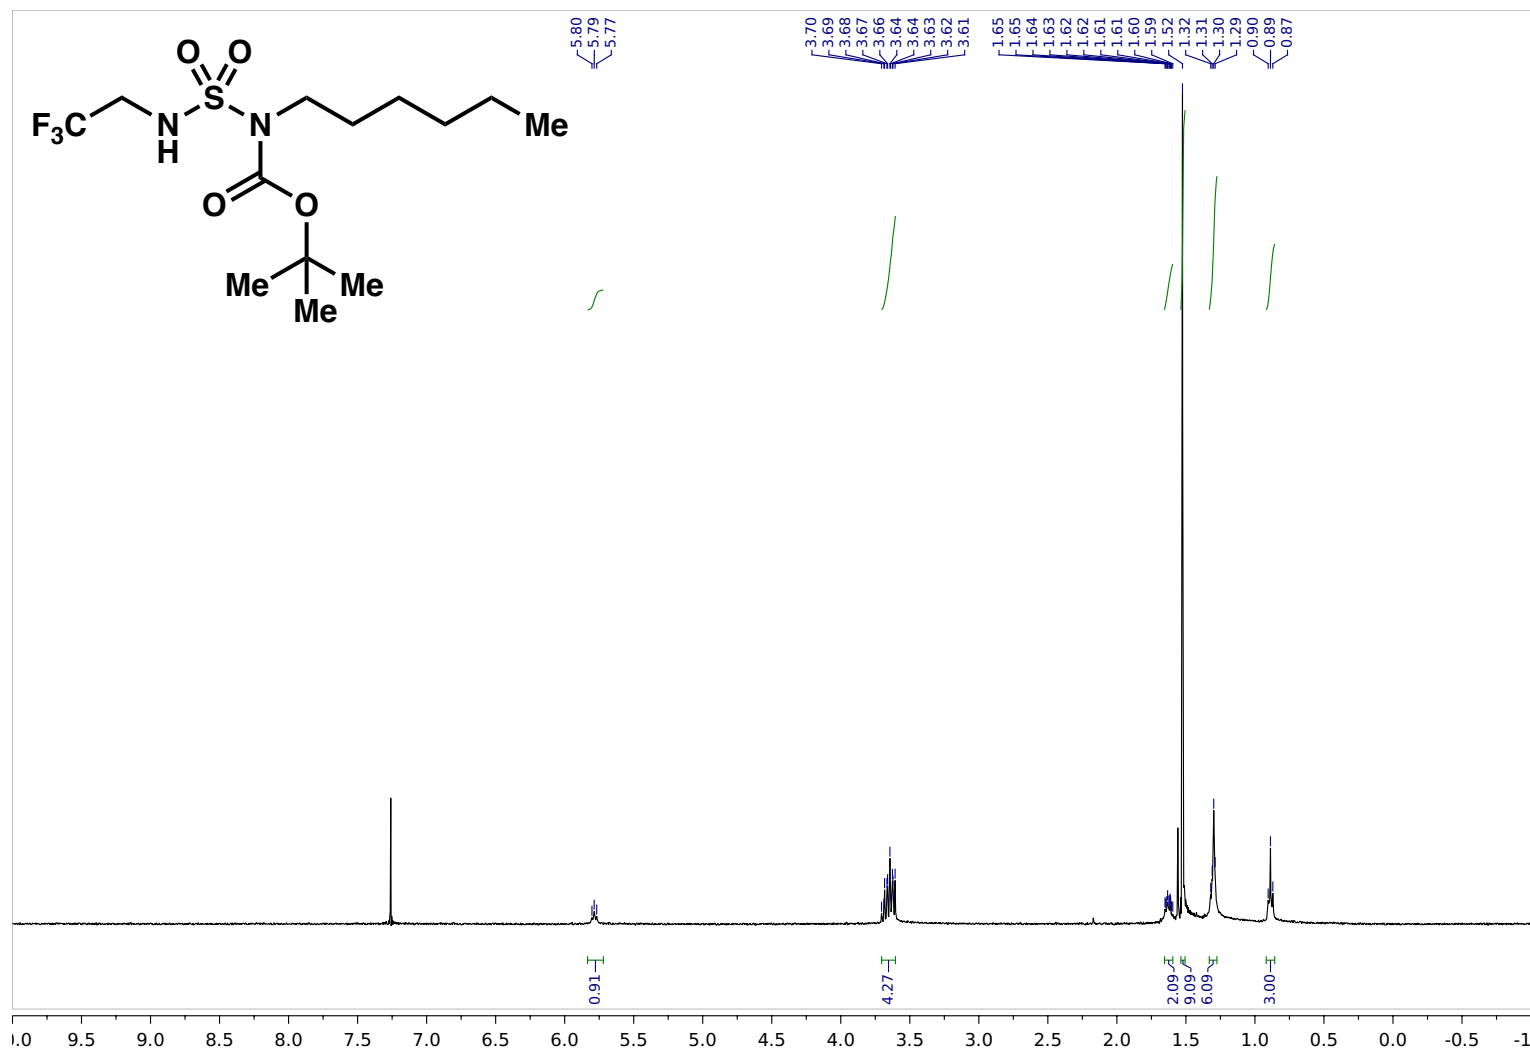

<sup>1</sup>H NMR (400 MHz, CDCl<sub>3</sub>) for *N-tert*-butoxycarbonyl-*N*-hexyl-*N'*-(2,2,2-trifluoroethyl)sulfamide (S8o)

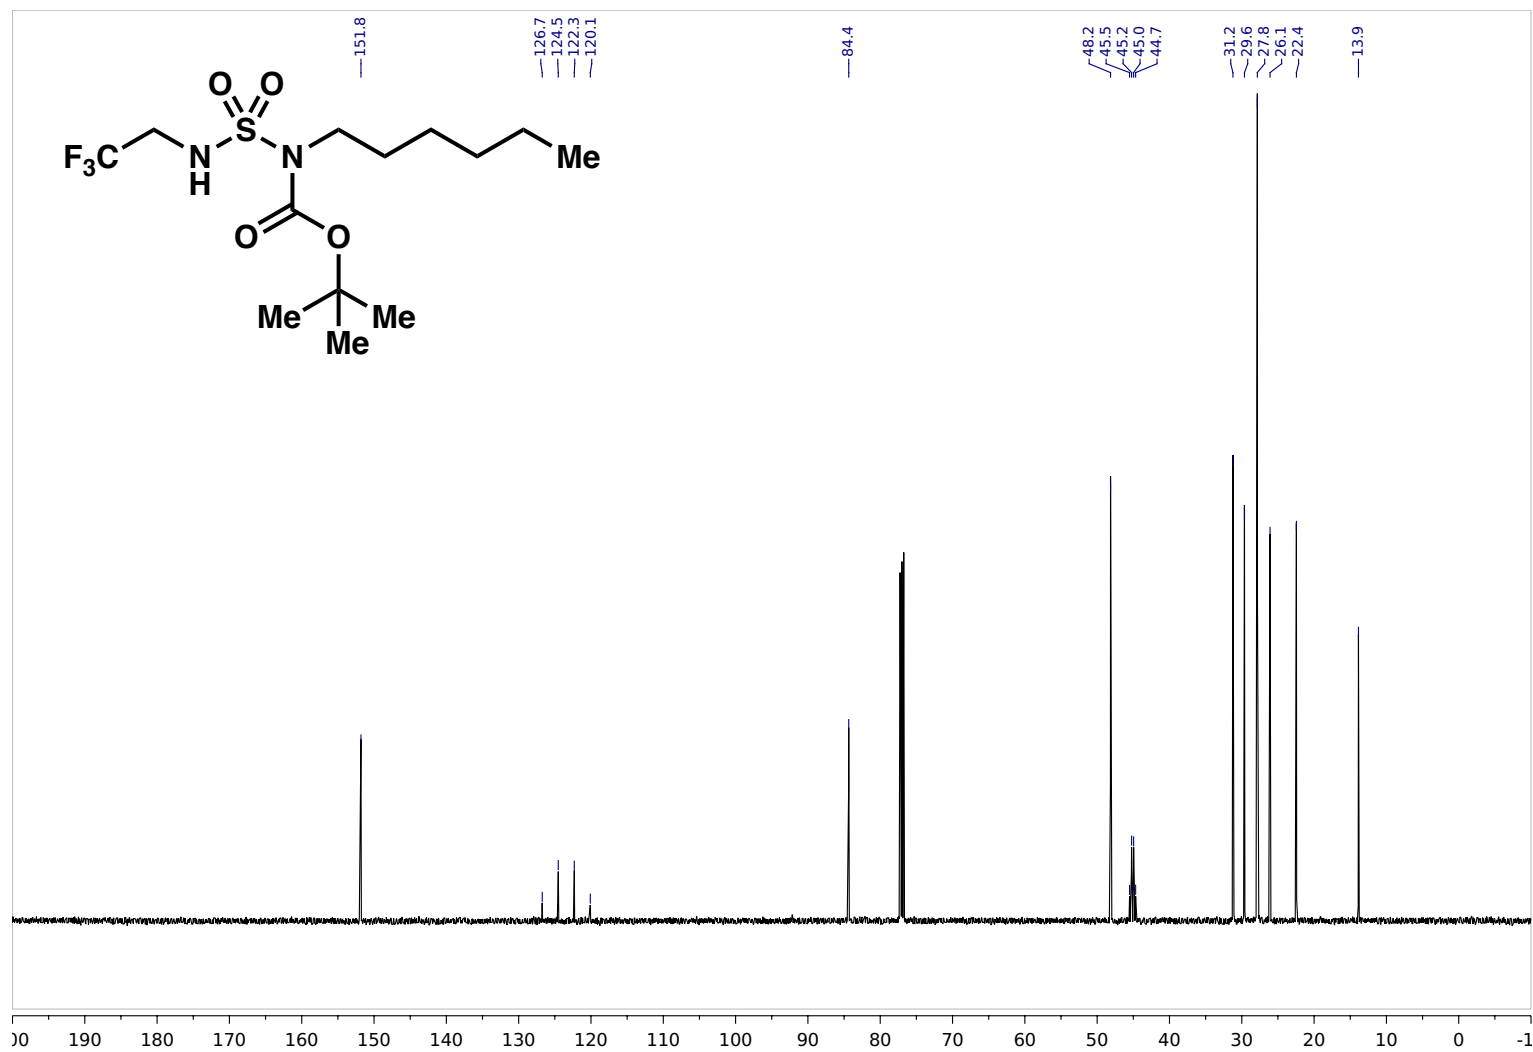

<sup>13</sup>C NMR (126 MHz, CDCl<sub>3</sub>) for *N-tert-butoxycarbonyl-N-hexyl-N'-(2,2,2-trifluoroethyl)sulfamide* (S80)



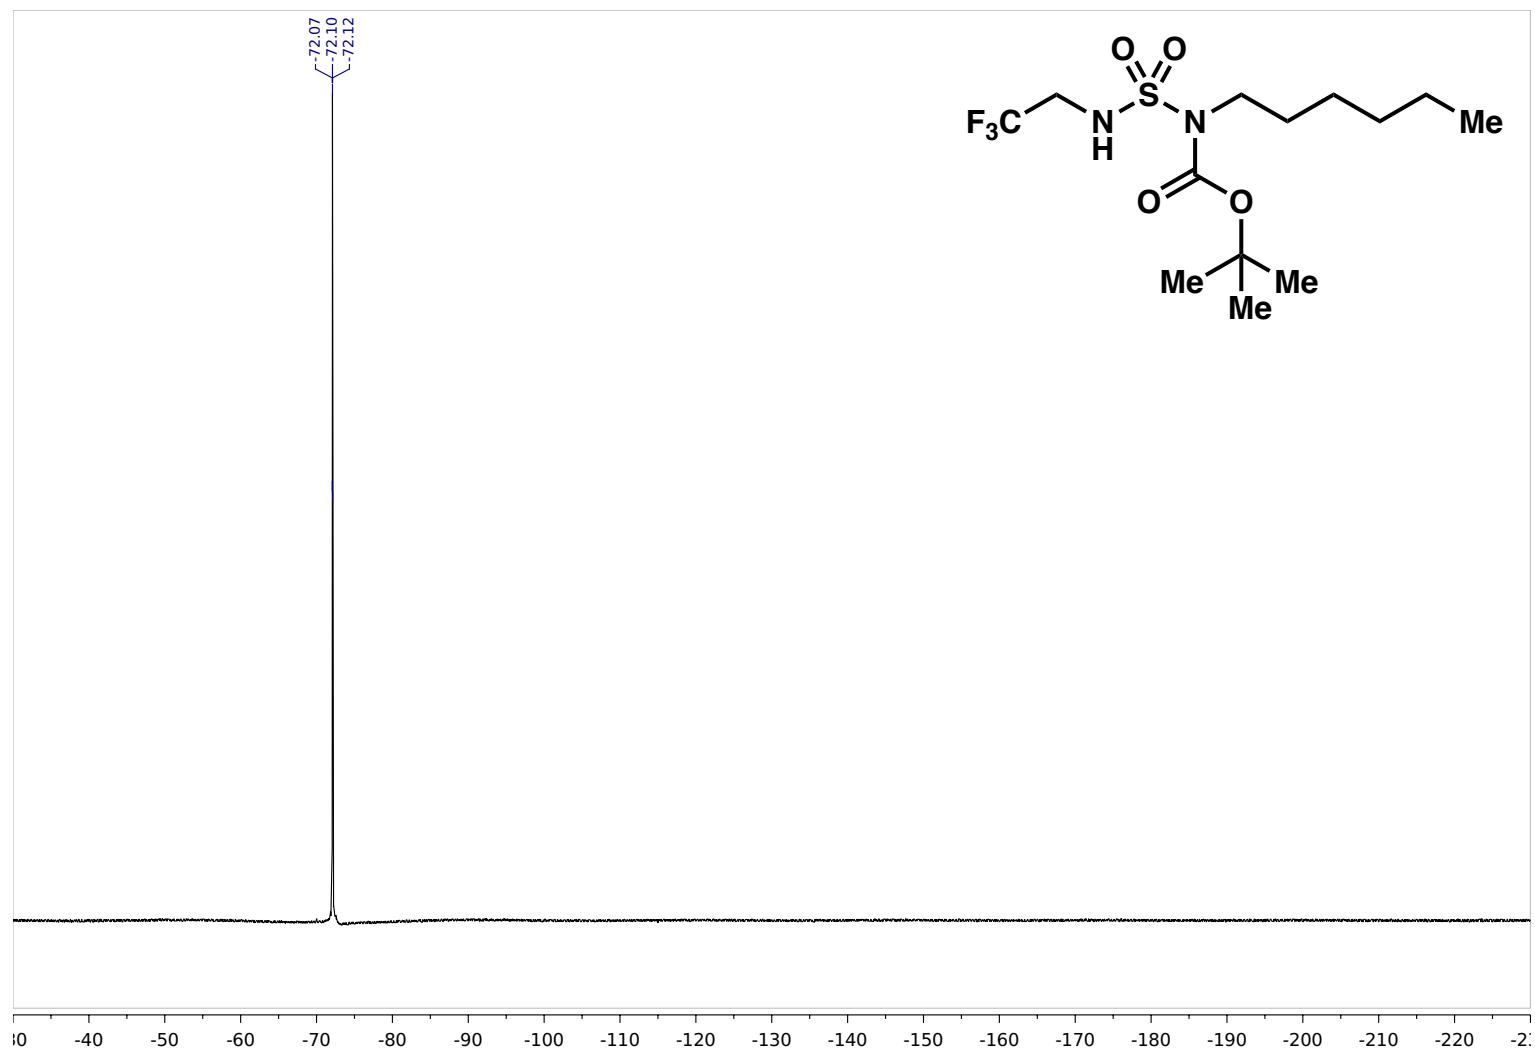

$^{19}\text{F}$  NMR (376 MHz,  $\text{CDCl}_3$ ) for *N-tert*-butoxycarbonyl-*N*-hexyl-*N'*-(2,2,2-trifluoroethyl)sulfamide (S80)

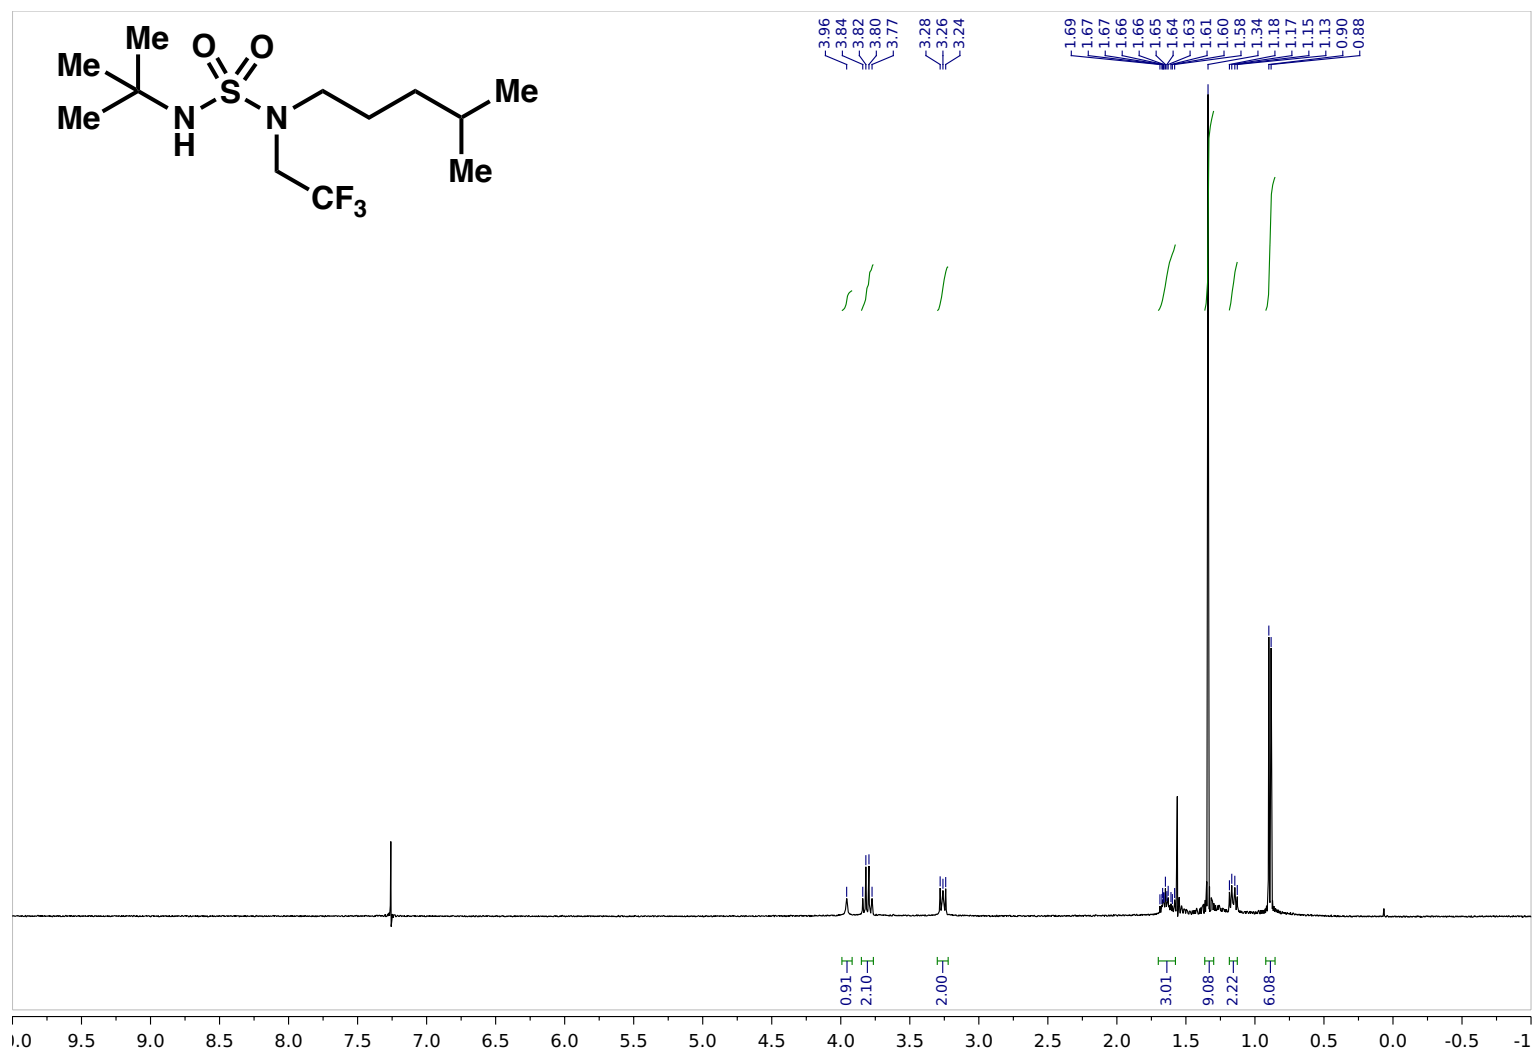

<sup>1</sup>H NMR (400 MHz, CDCl<sub>3</sub>) for *N*-*tert*-Butyl-*N'*-4-methylpentyl-*N''*-(2,2,2-trifluoroethyl)sulfamide (S8p)

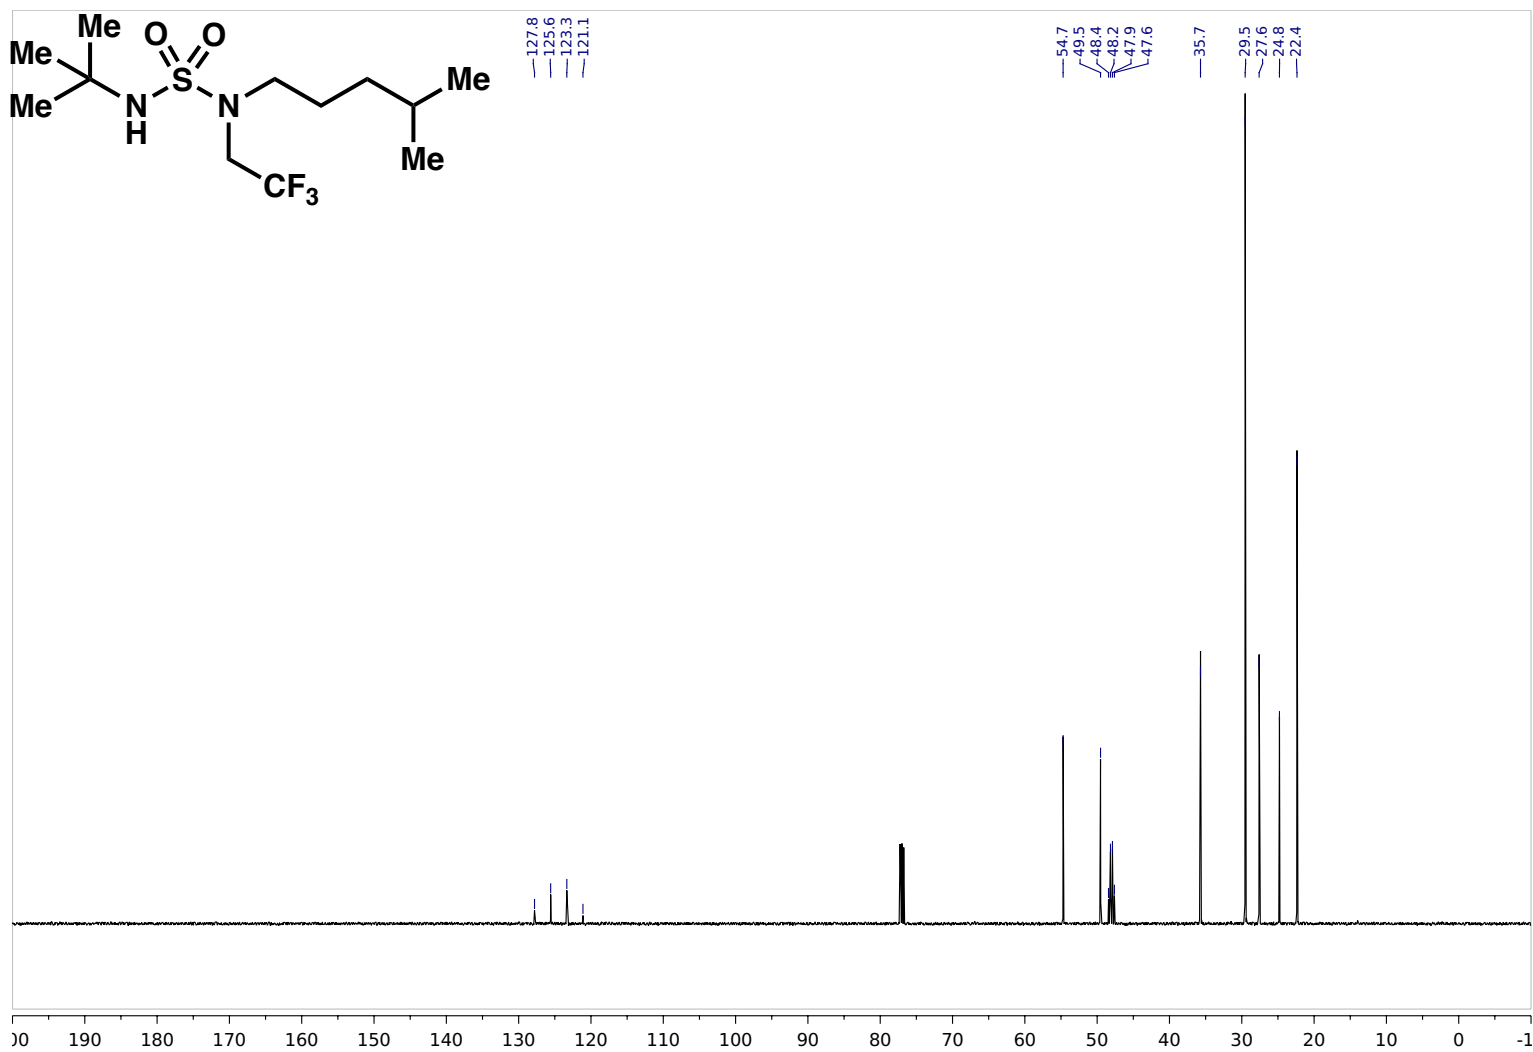

<sup>13</sup>C NMR (126 MHz, CDCl<sub>3</sub>) for *N*-*tert*-Butyl-*N'*-4-methylpentyl-*N''*-(2,2,2-trifluoroethyl)sulfamide (S8p)

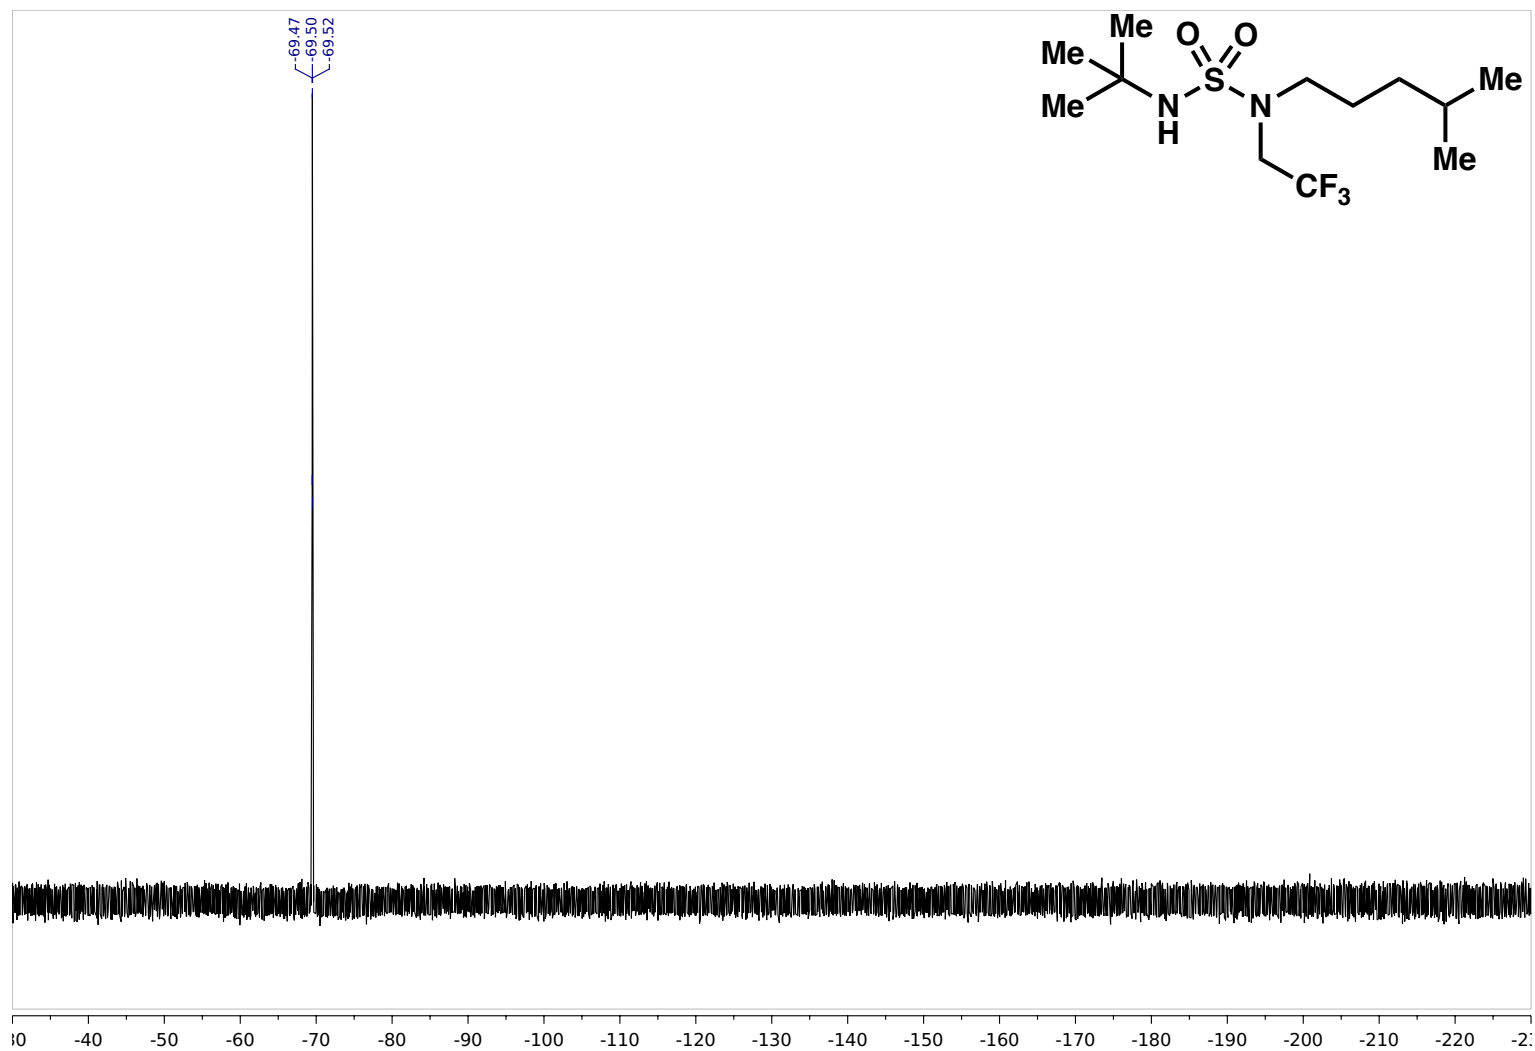

$^{19}\text{F}$  NMR (376 MHz,  $\text{CDCl}_3$ ) for *N*-*tert*-butyl-*N'*-4-methylpentyl-*N''*-(2,2,2-trifluoroethyl)sulfamide (S8p)

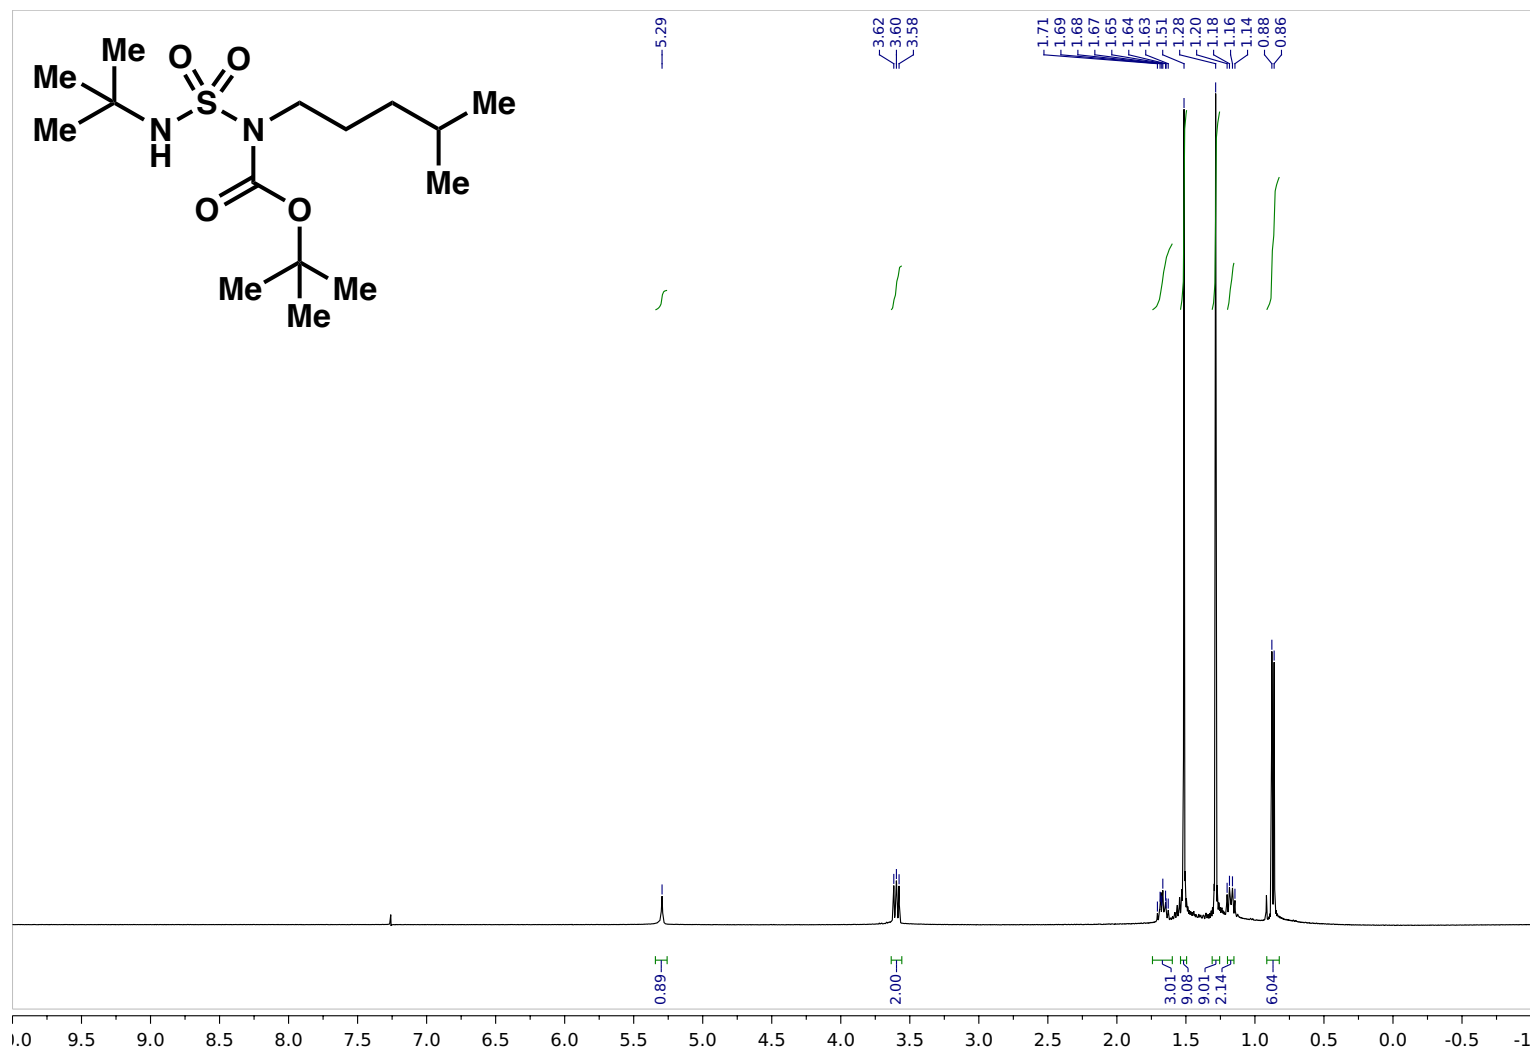

<sup>1</sup>H NMR (400 MHz, CDCl<sub>3</sub>) for *N*-*tert*-butoxycarbonyl-*N'*-*tert*-butyl-*N*-4-methylpentylsulfamide (**S8q**)

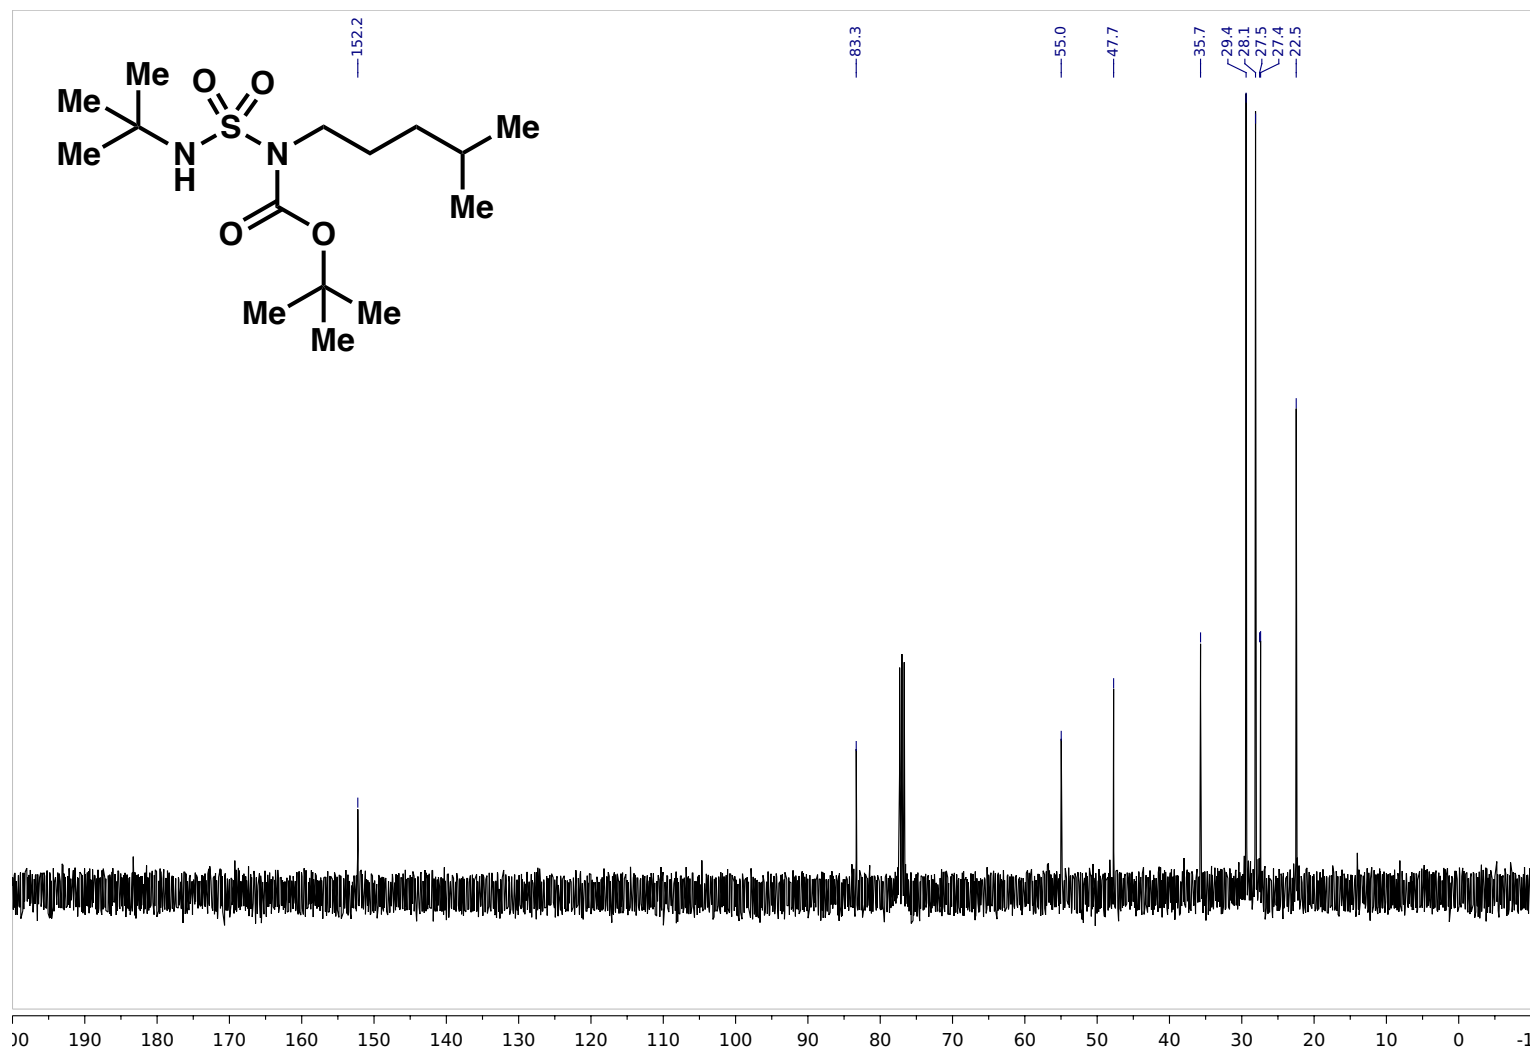

<sup>13</sup>C NMR (101 MHz, CDCl<sub>3</sub>) for *N*-*tert*-butoxycarbonyl-*N'*-*tert*-butyl-*N*-4-methylpentylsulfamide (**S8q**)

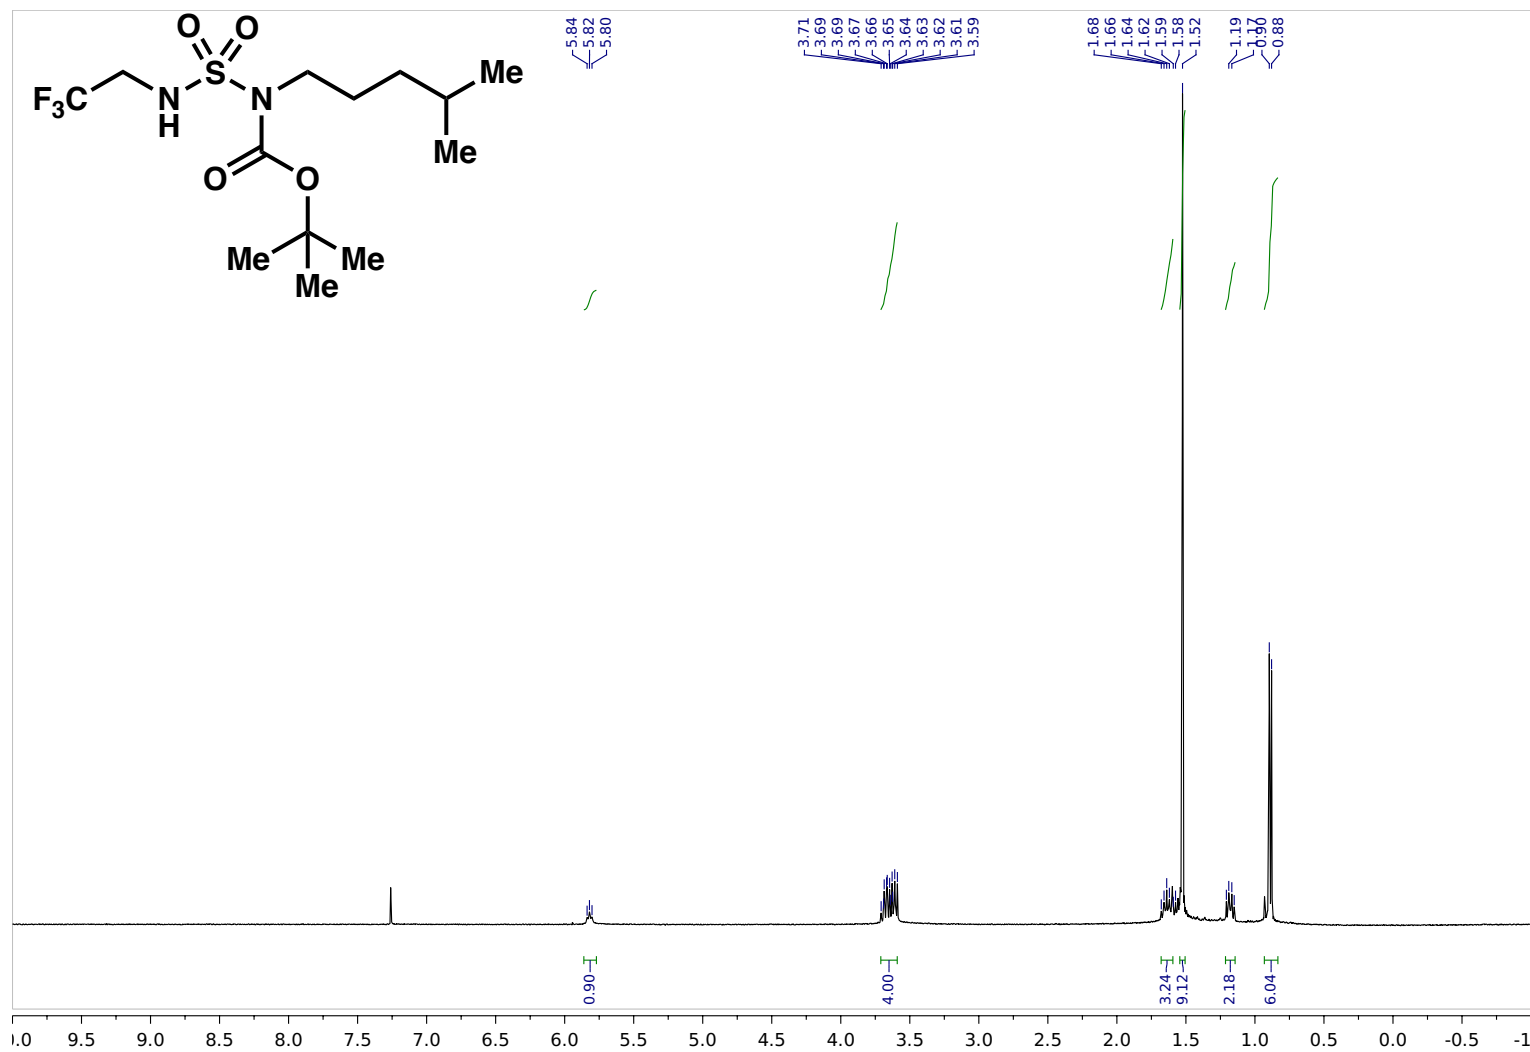

<sup>1</sup>H NMR (400 MHz, CDCl<sub>3</sub>) for *N*-*tert*-Butoxycarbonyl-*N*-4-methylpentyl-*N'*-(2,2,2-trifluoroethyl)sulfamide (**S8r**)

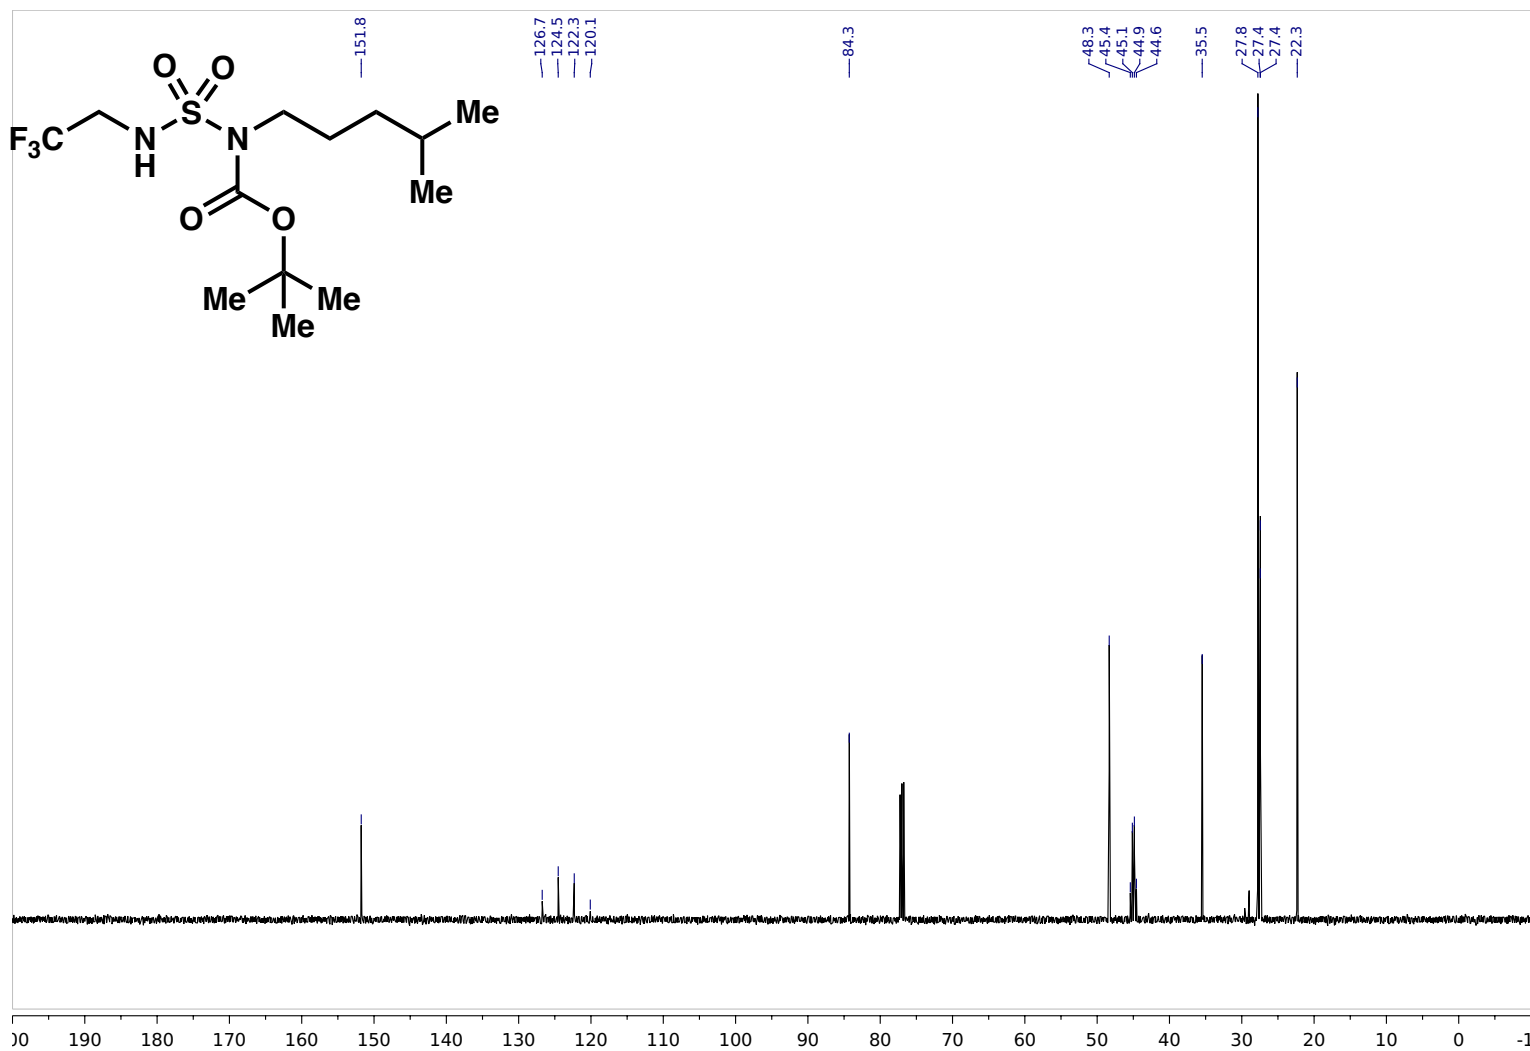

<sup>13</sup>C NMR (126 MHz, CDCl<sub>3</sub>) for *N-tert*-Butoxycarbonyl-*N*-4-methylpentyl-*N'*-(2,2,2-trifluoroethyl)sulfamide (**S8r**)



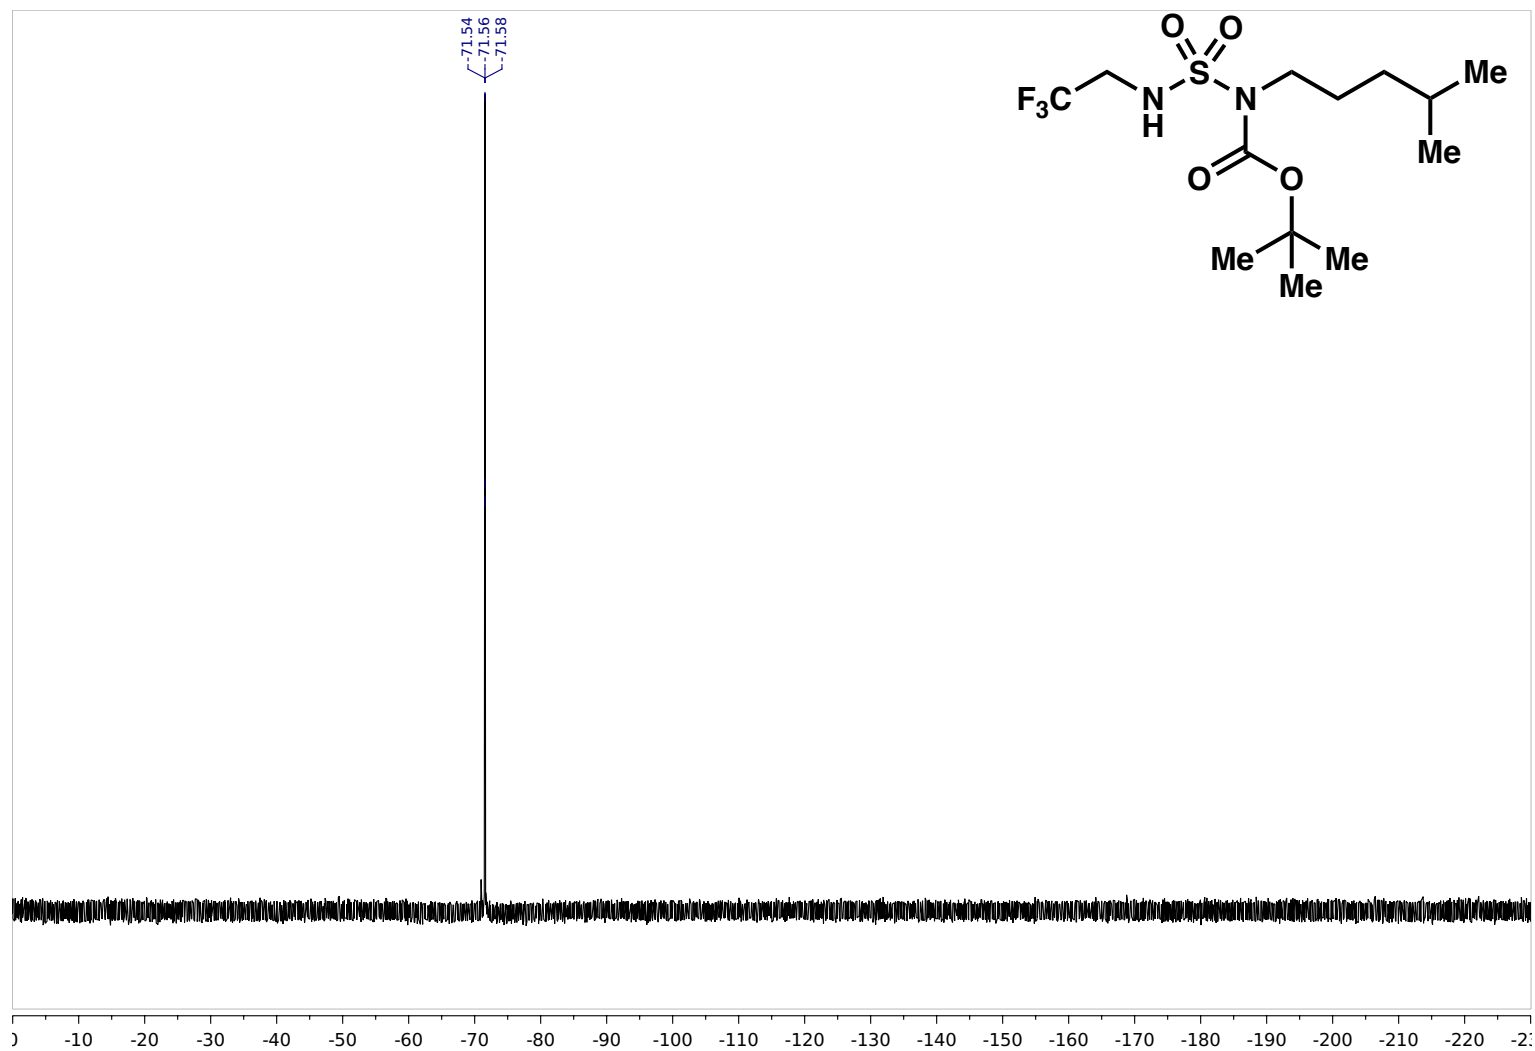

$^{19}\text{F}$  NMR (376 MHz,  $\text{CDCl}_3$ ) for *N*-*tert*-Butoxycarbonyl-*N*-4-methylpentyl-*N'*-(2,2,2-trifluoroethyl)sulfamide (S8r)

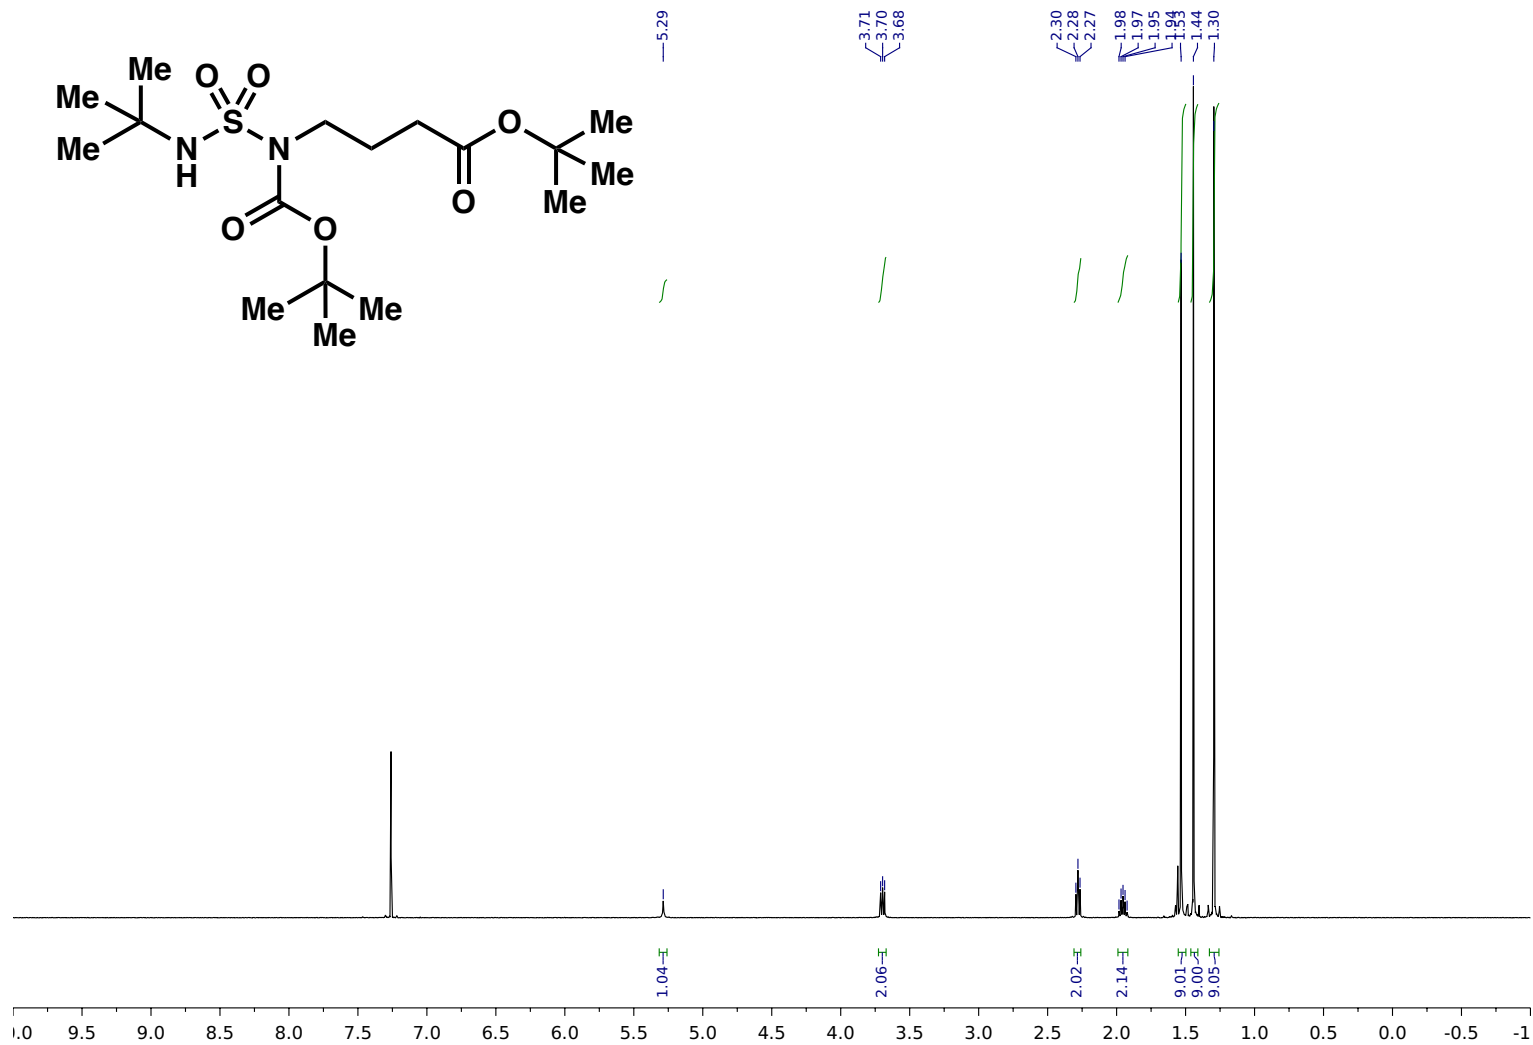

<sup>1</sup>H NMR (400 MHz, CDCl<sub>3</sub>) for *N*-*tert*-butoxycarbonyl-*N'*-*tert*-butyl-*N*-(*tert*-butyl butano-4-yl)sulfamide (**S8t**)

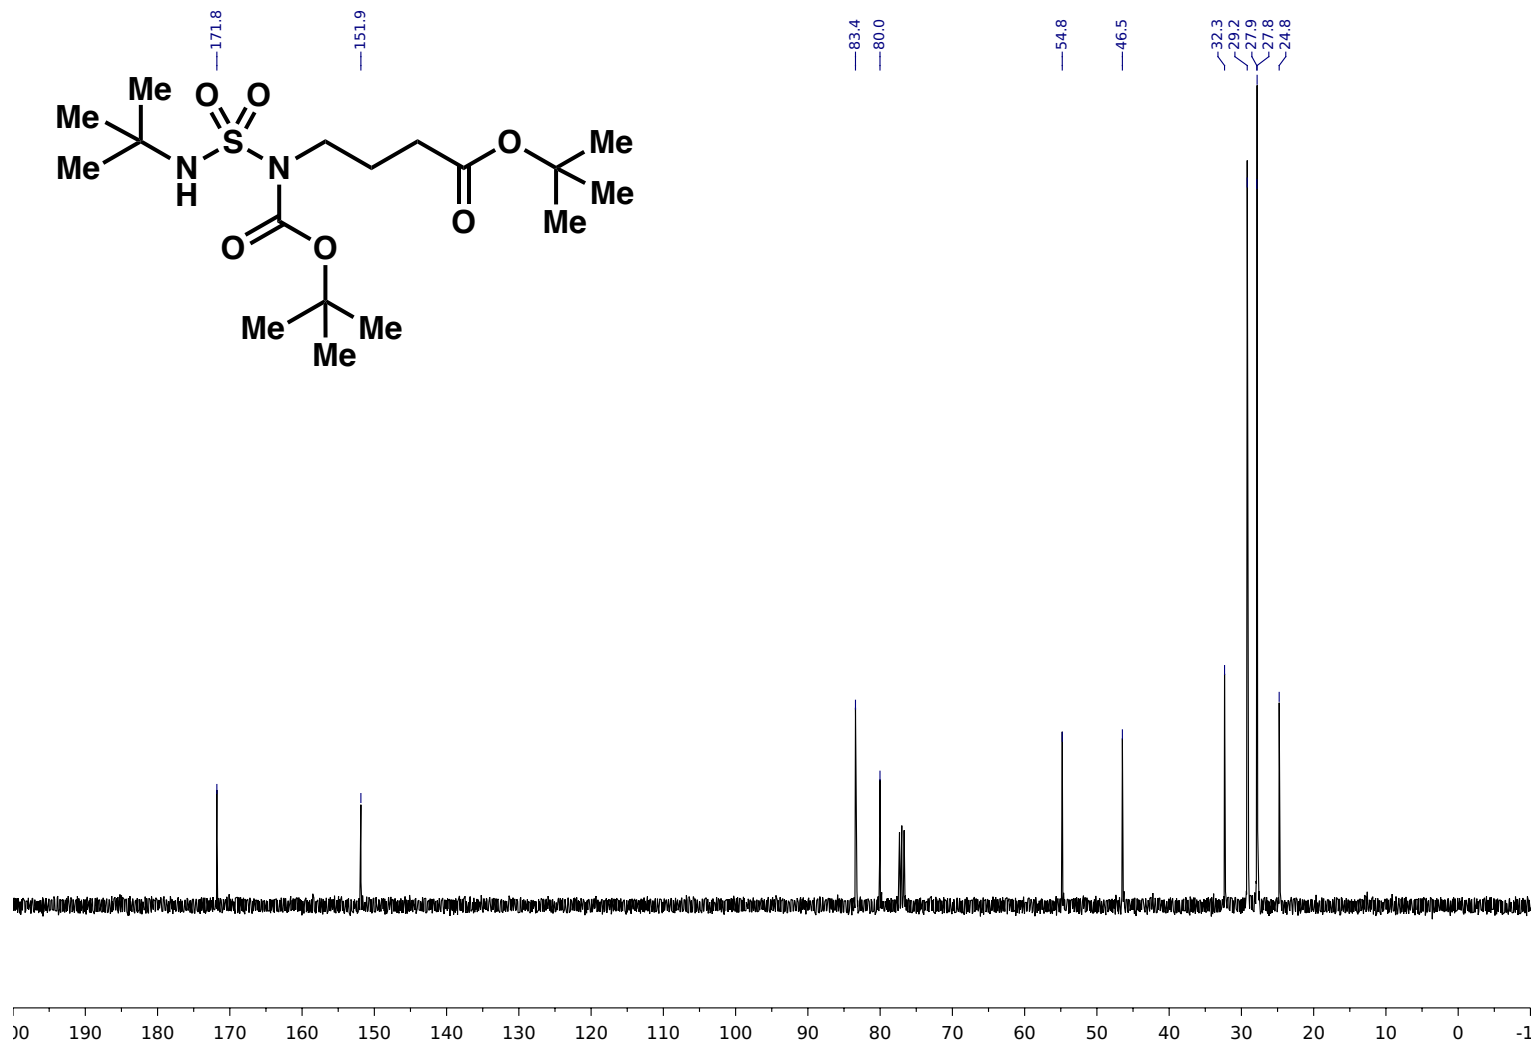

$^{13}\text{C}$  NMR (101 MHz,  $\text{CDCl}_3$ ) for *N*-*tert*-butoxycarbonyl-*N'*-*tert*-butyl-*N*-(*tert*-butyl butano-4-yl)sulfamide (**S8t**)

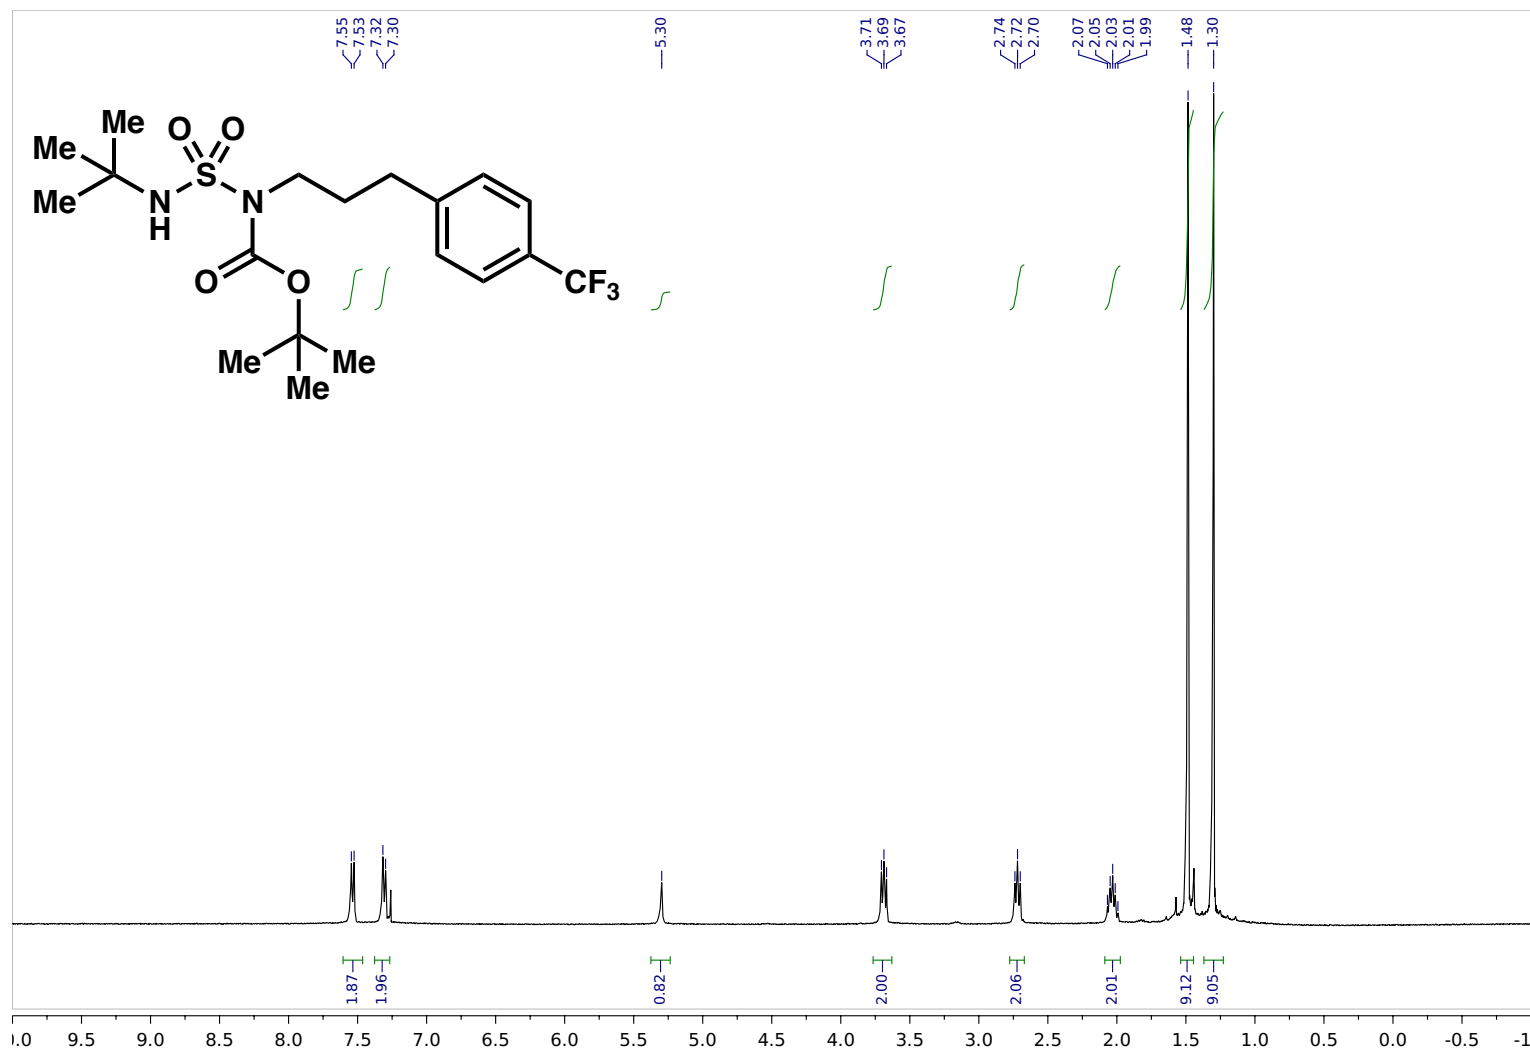

<sup>1</sup>H NMR (400 MHz, CDCl<sub>3</sub>) for *N*-tert-butoxycarbonyl-*N'*-tert-butyl-*N*-(3-((4-trifluoromethyl)phenyl)prop-1-yl)sulfamide (S8u)

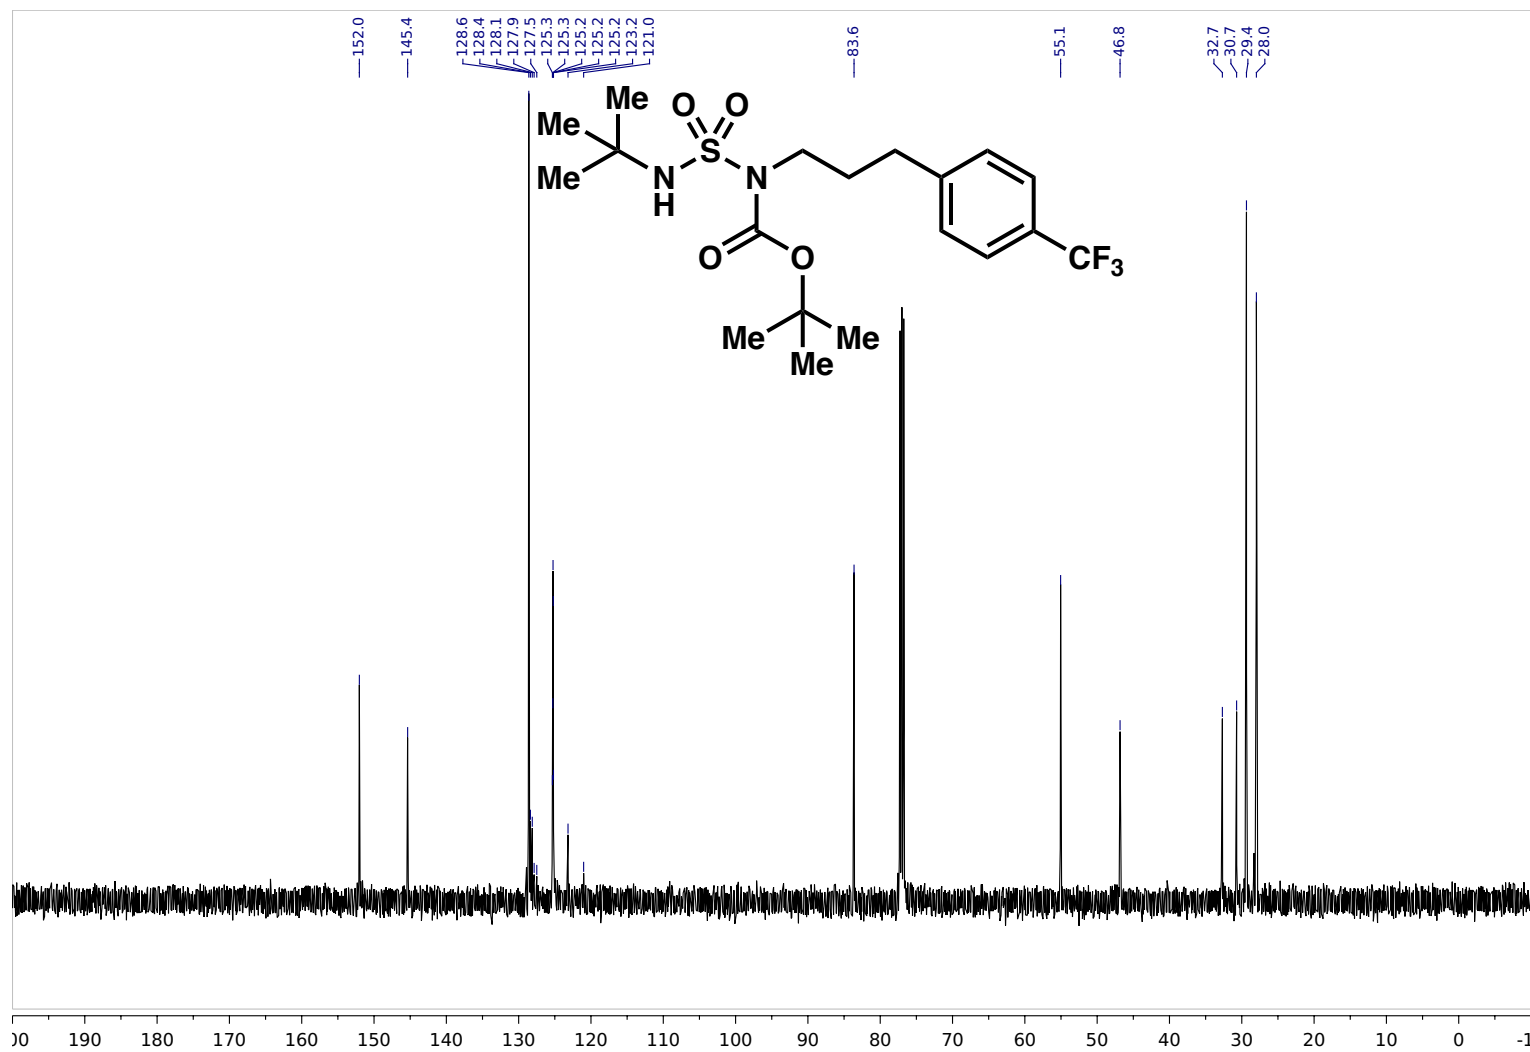

<sup>13</sup>C NMR (126 MHz, CDCl<sub>3</sub>) for *N*-*tert*-butoxycarbonyl-*N'*-*tert*-butyl-*N*-(3-((4-trifluoromethyl)phenyl)prop-1-yl)sulfamide (S8u)

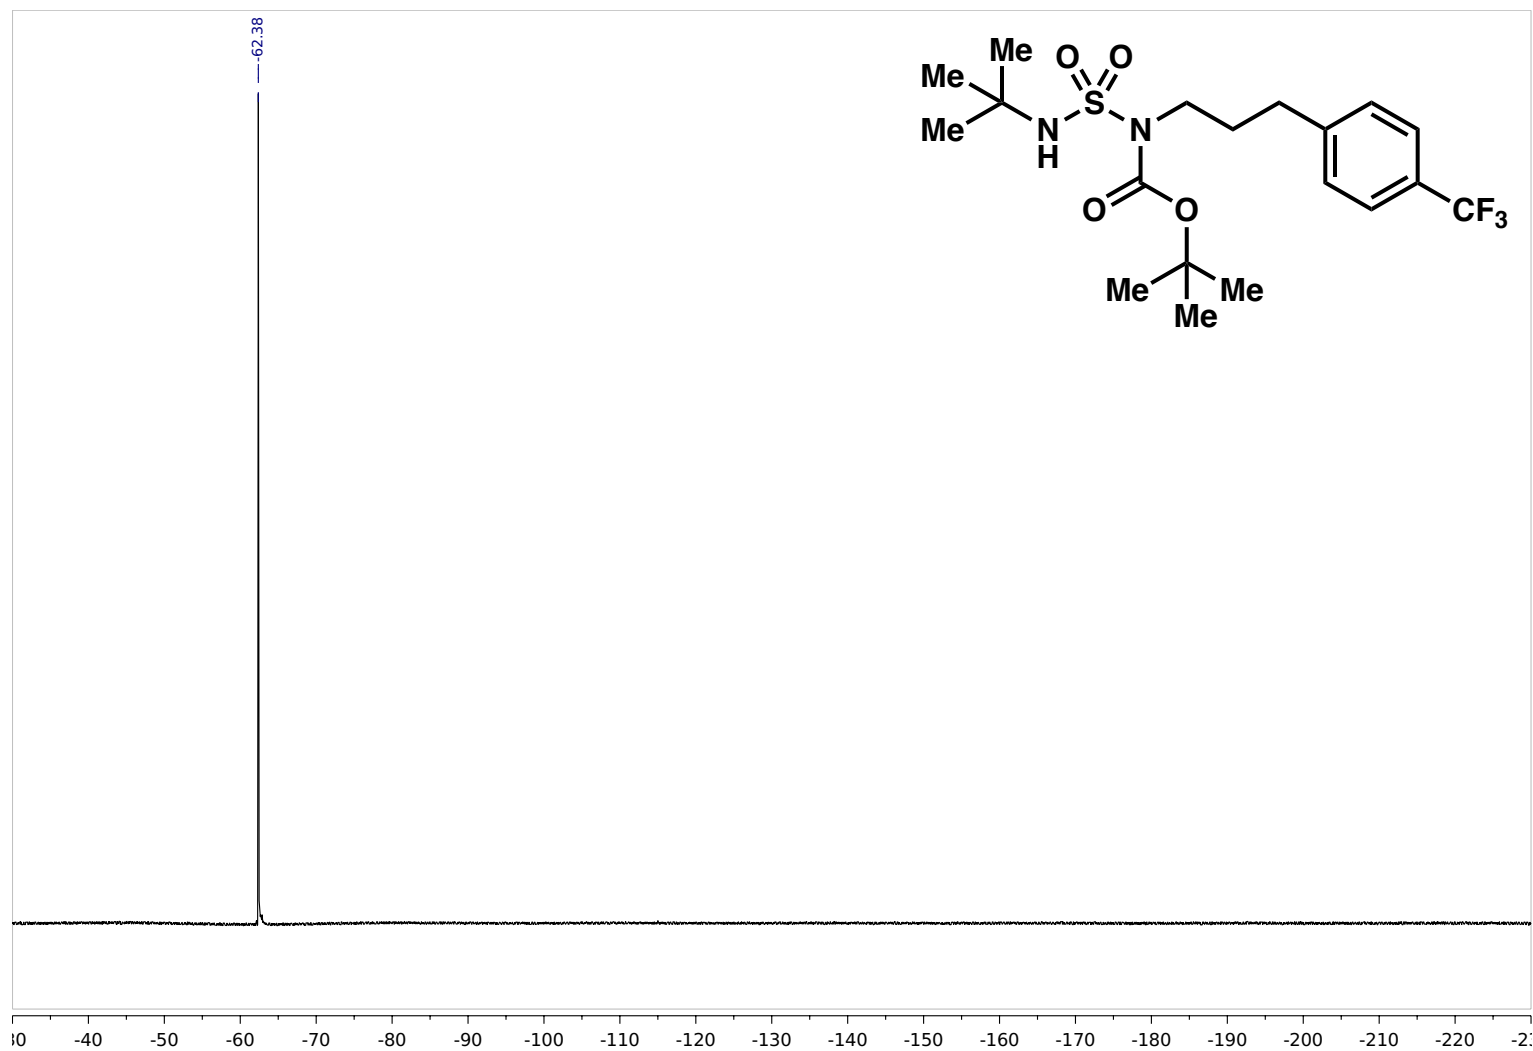

<sup>19</sup>F NMR (376 MHz, CDCl<sub>3</sub>) for *N*-*tert*-butoxycarbonyl-*N'*-*tert*-butyl-*N*-(3-((4-trifluoromethyl)phenyl)prop-1-yl)sulfamide (**S8u**)

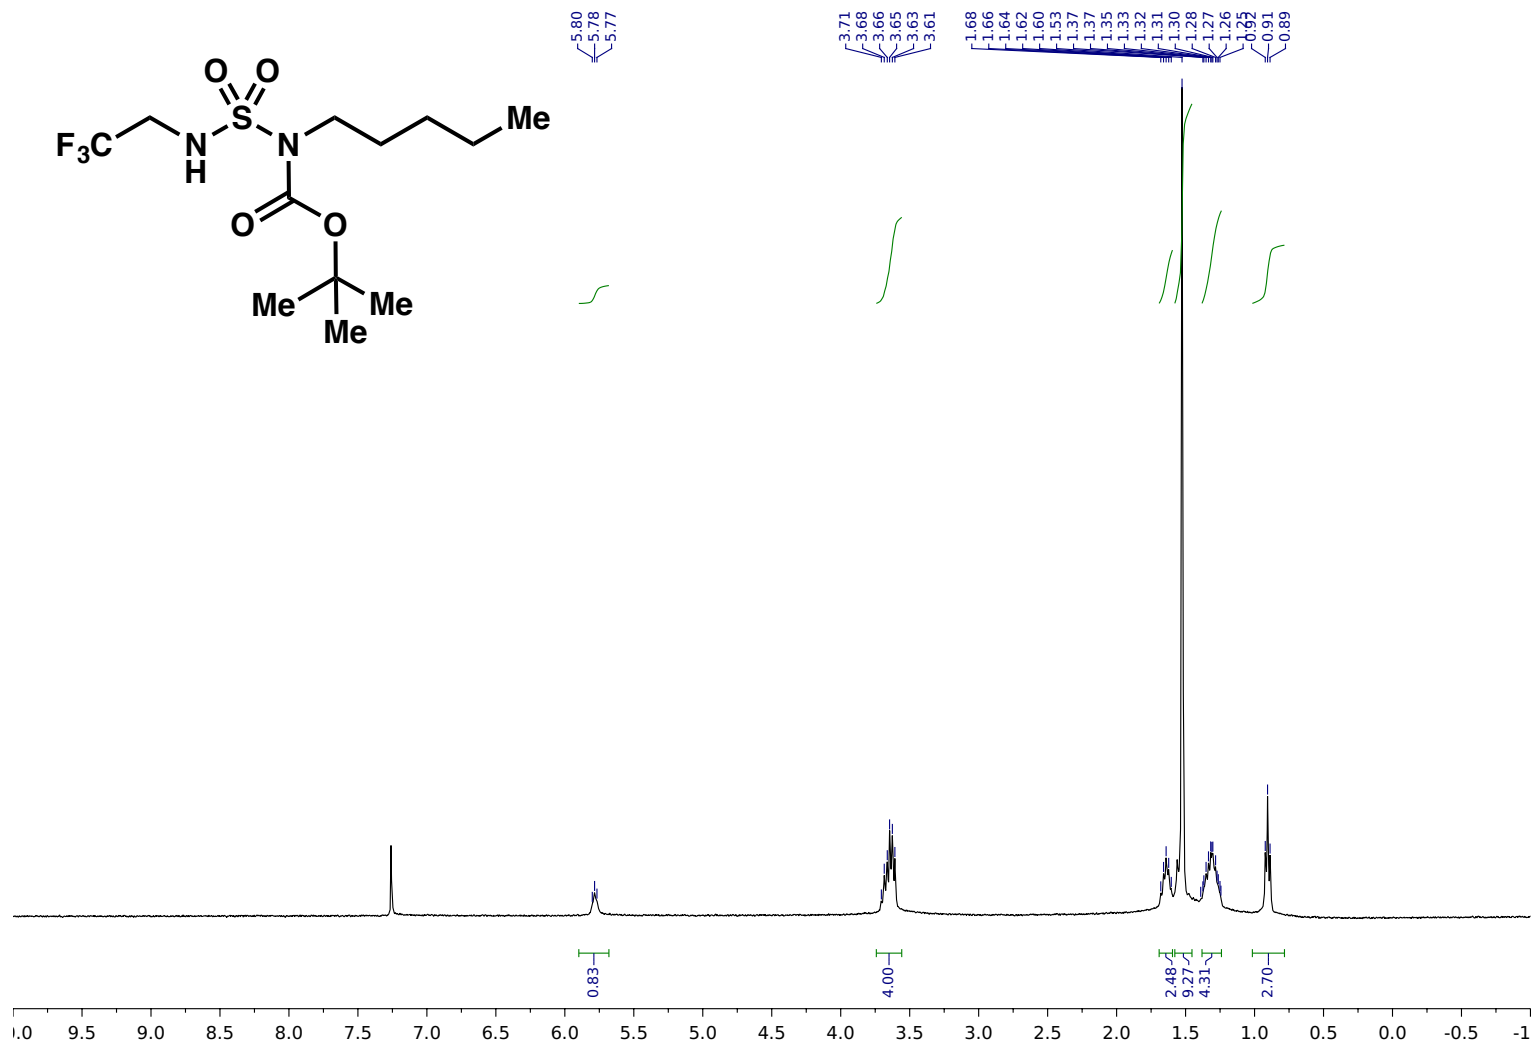

<sup>1</sup>H NMR (400 MHz, CDCl<sub>3</sub>) for *N-tert-butoxycarbonyl-N'-(2,2,2-trifluoroethyl)-N-pentylsulfamide* (**S8v**)

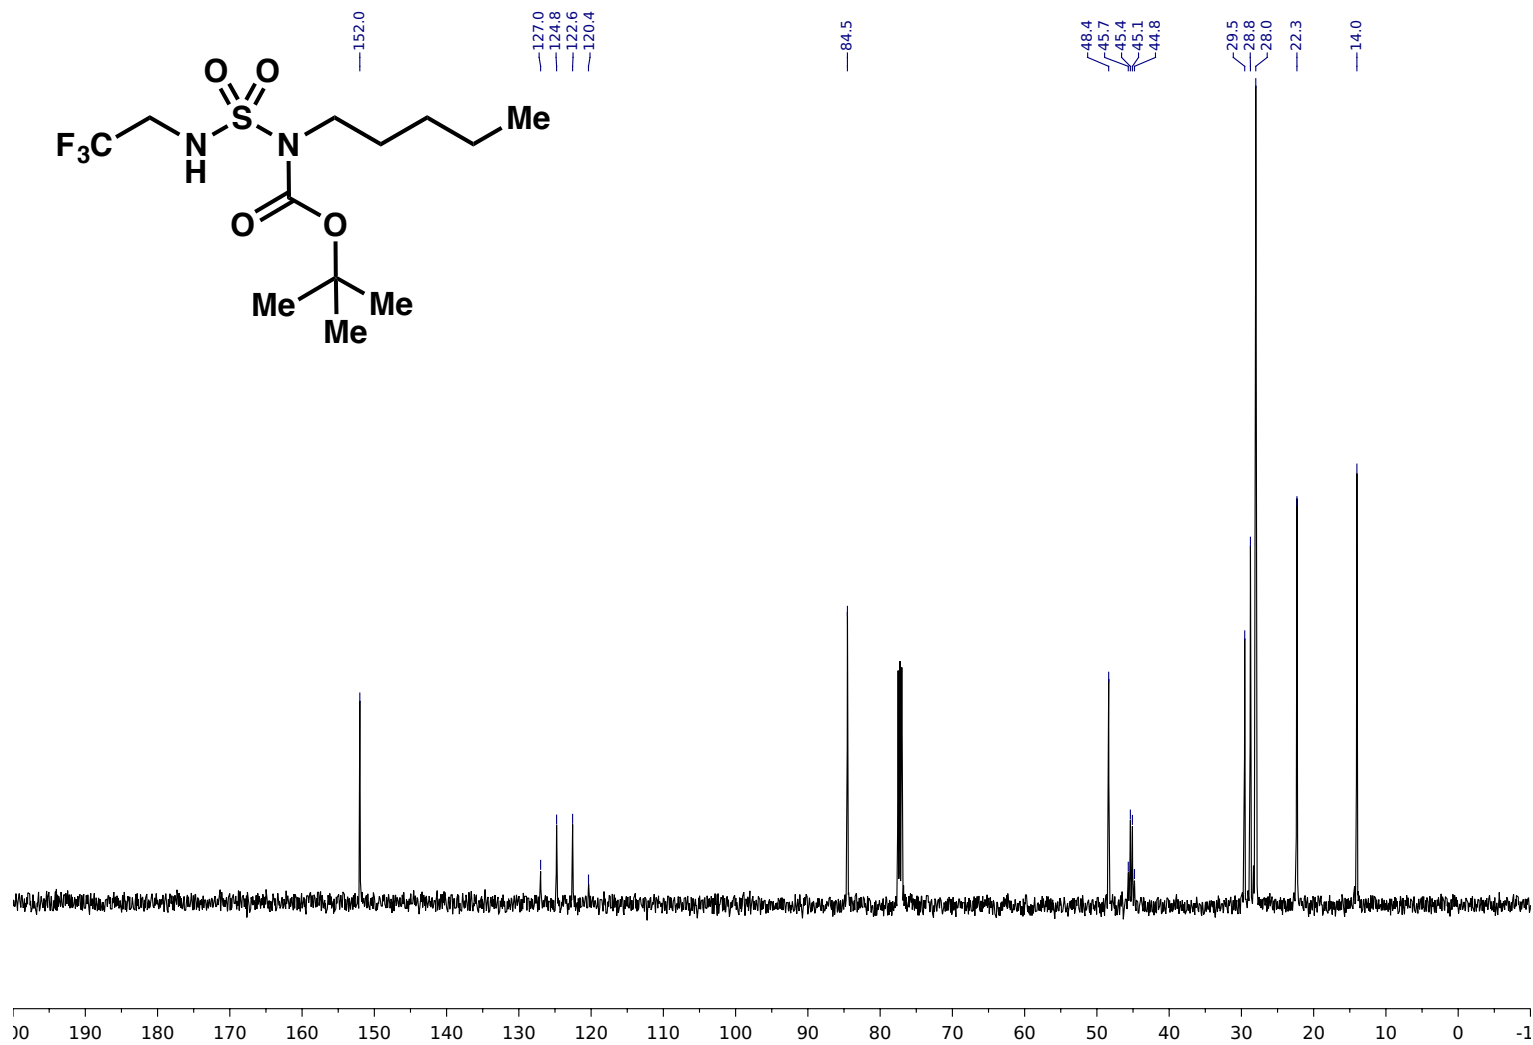

<sup>13</sup>C NMR (126 MHz, CDCl<sub>3</sub>) for *N*-*tert*-butoxycarbonyl-*N'*-(2,2,2-trifluoroethyl)-*N*-pentylsulfamide (**S8v**)



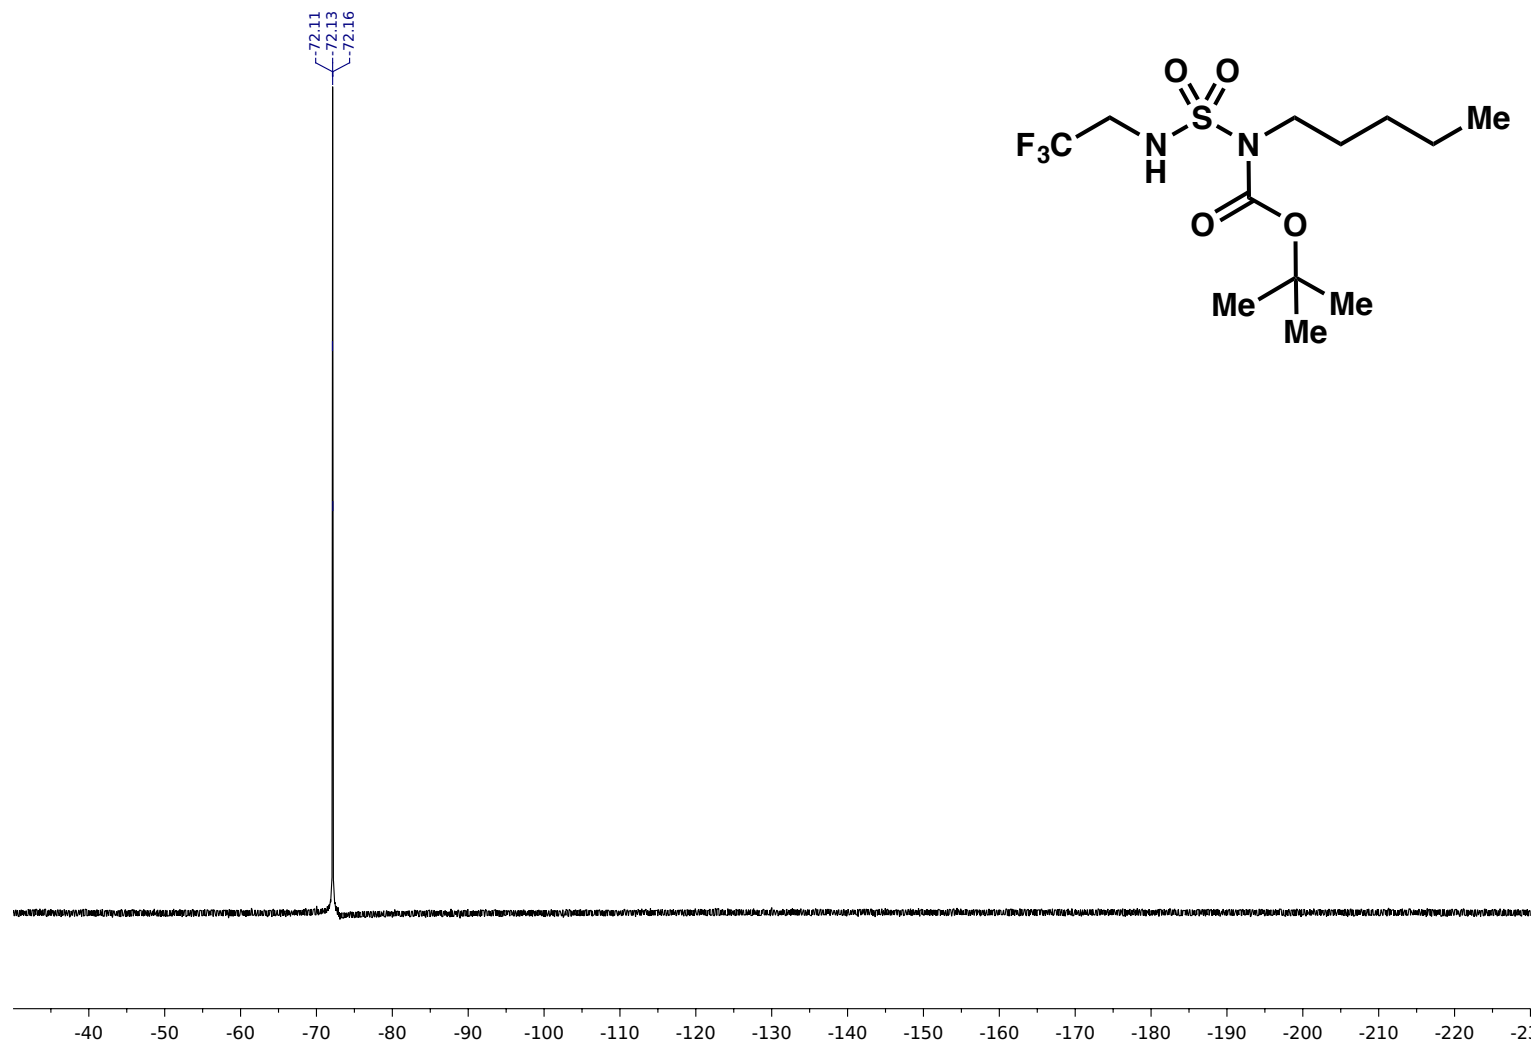

$^{19}\text{F}$  NMR (376 MHz,  $\text{CDCl}_3$ ) for *N*-*tert*-butoxycarbonyl-*N'*-(2,2,2-trifluoroethyl)-*N*-pentylsulfamide (S8v)

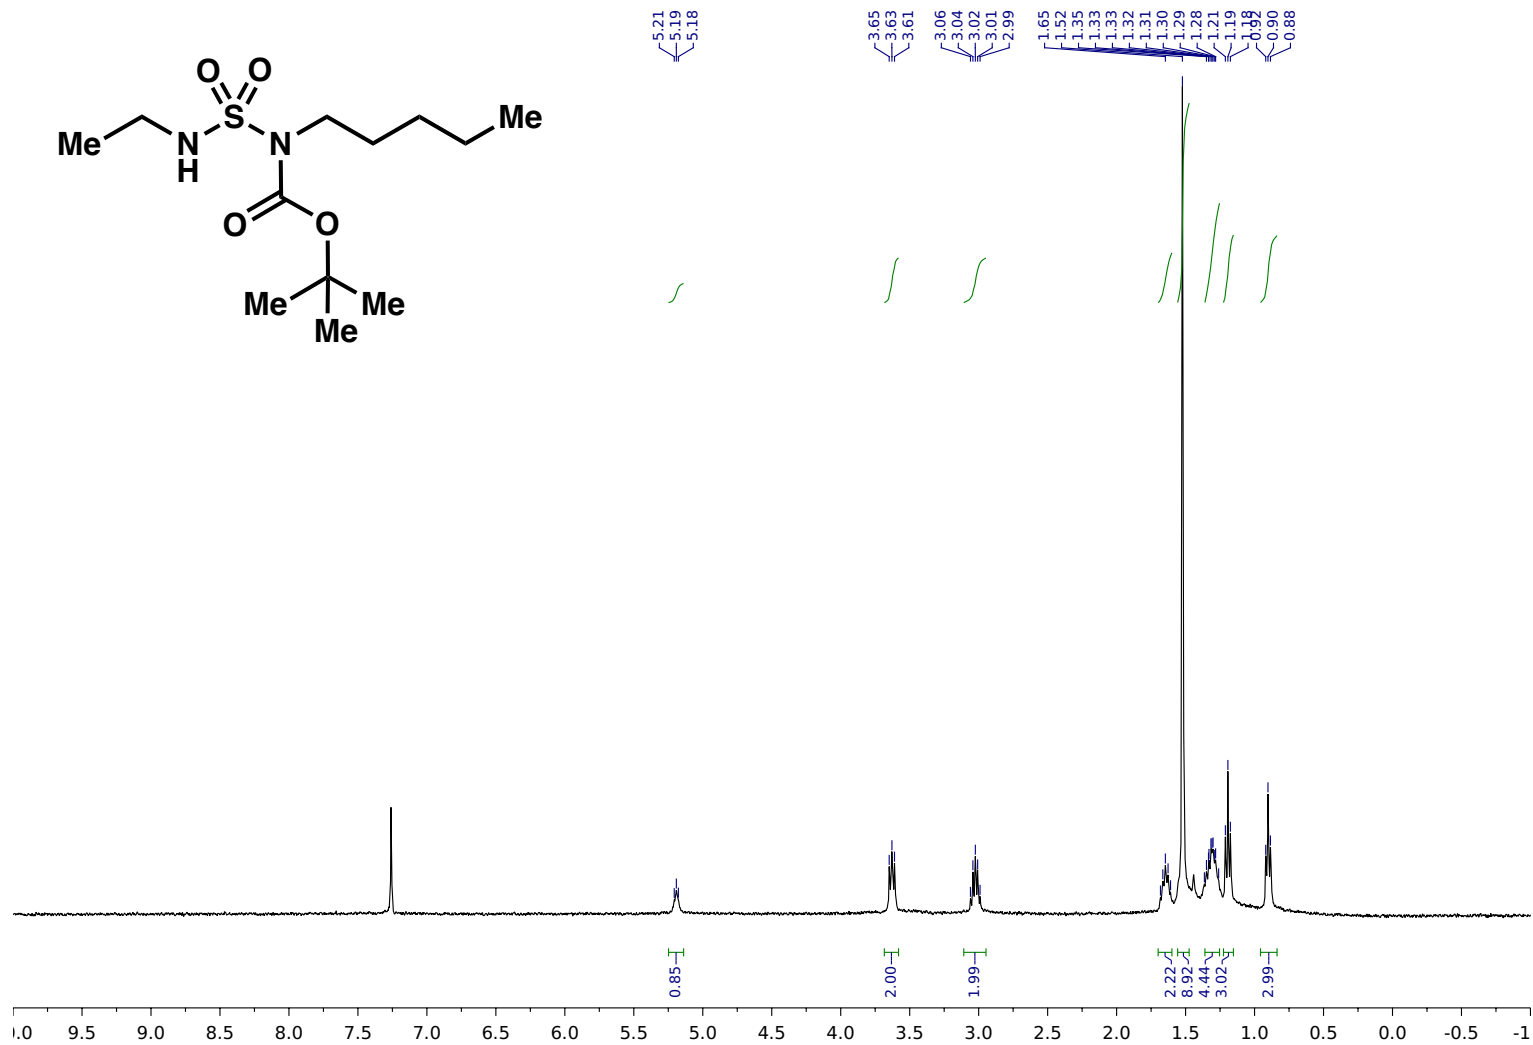

<sup>1</sup>H NMR (400 MHz, CDCl<sub>3</sub>) for *N*-*tert*-butoxycarbonyl-*N'*-ethyl-*N*-pentylsulfamide (S8u)

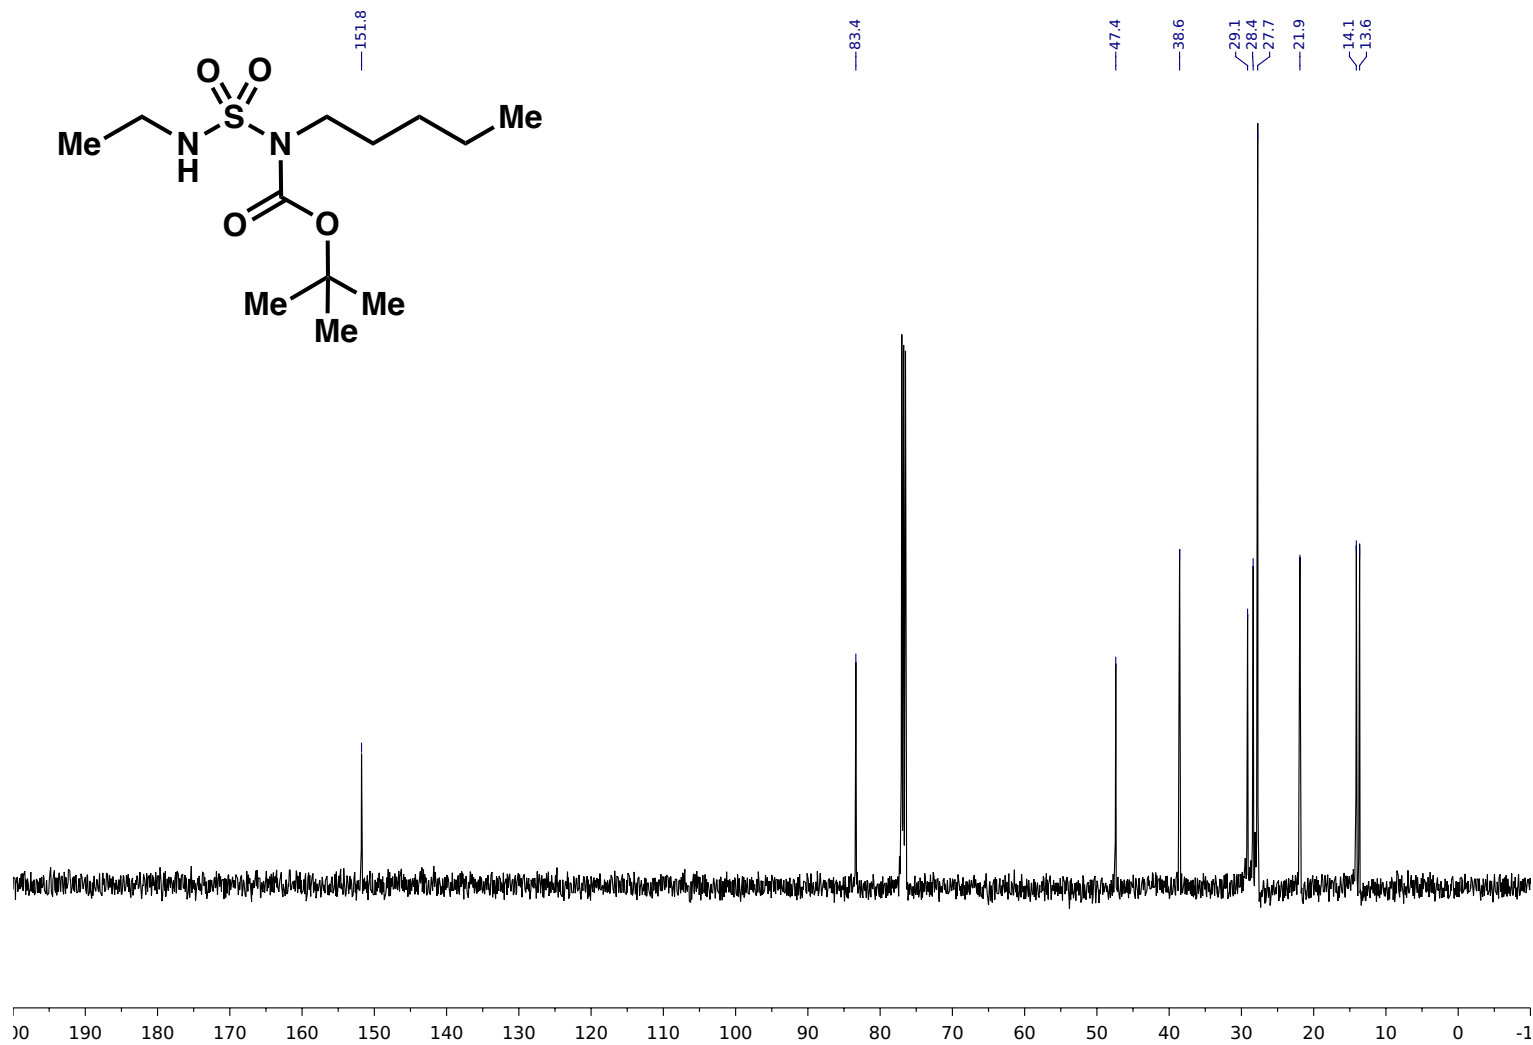

<sup>13</sup>C NMR (126 MHz, CDCl<sub>3</sub>) for *N-tert*-butoxycarbonyl-*N'*-ethyl-*N*-pentylsulfamide (**S8u**)

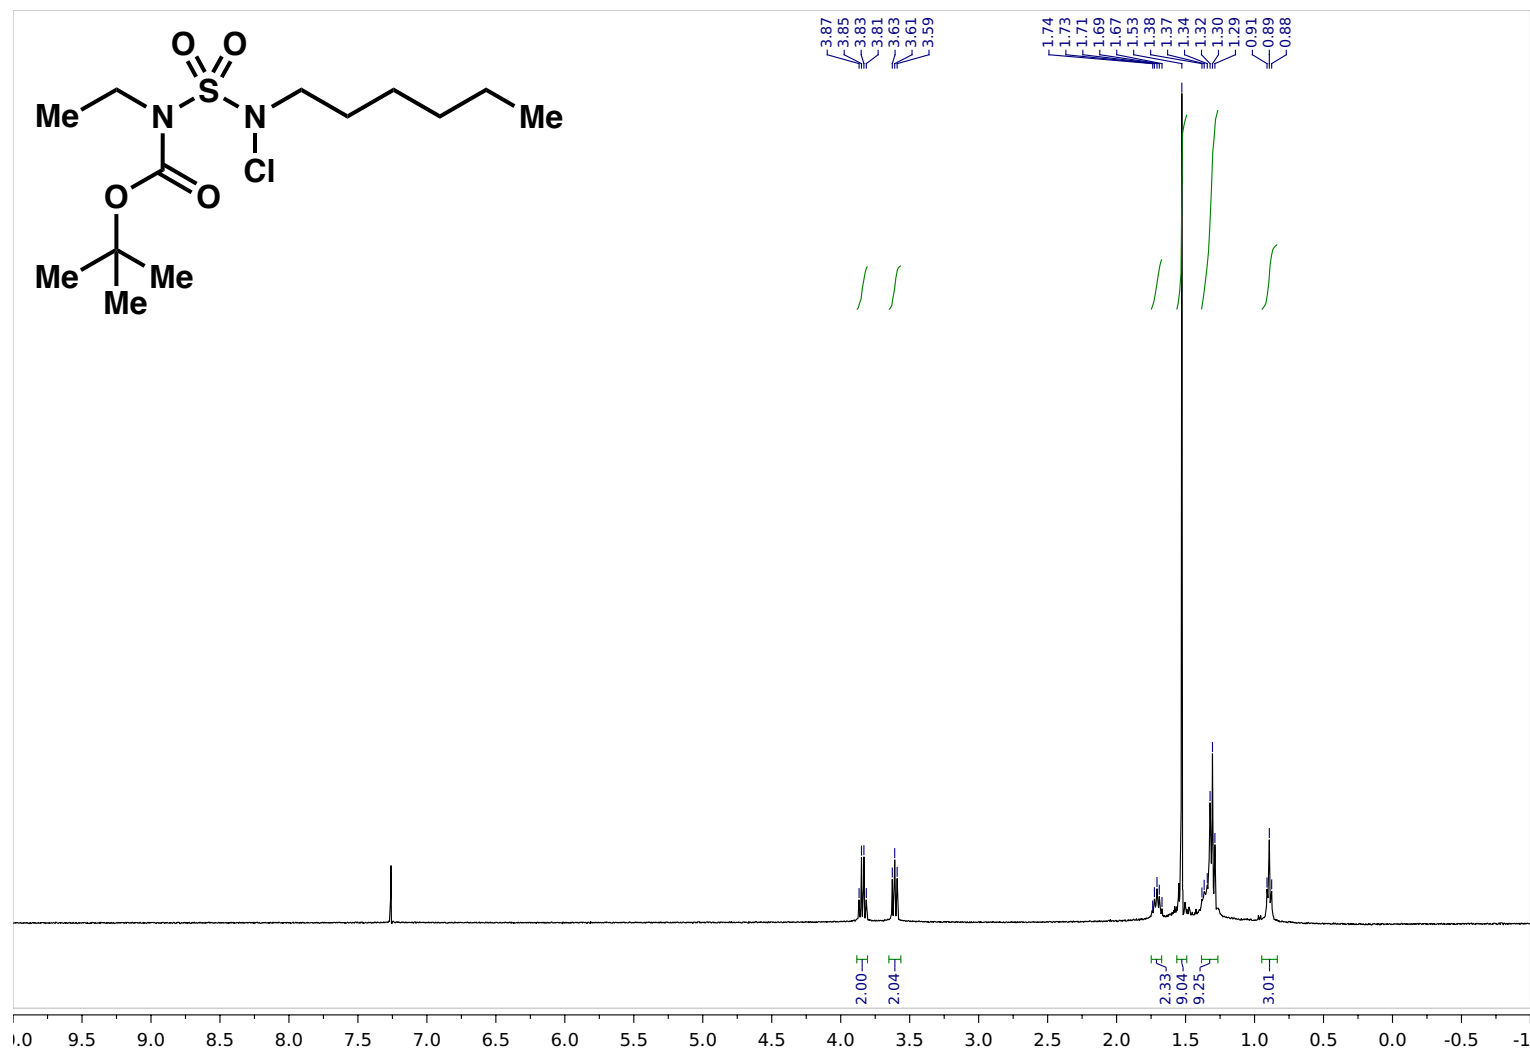

<sup>1</sup>H NMR (400 MHz, CDCl<sub>3</sub>) for *N*-*tert*-butoxycarbonyl-*N*-ethyl-*N'*-chloro-*N'*-hexylsulfamide (**5a**)

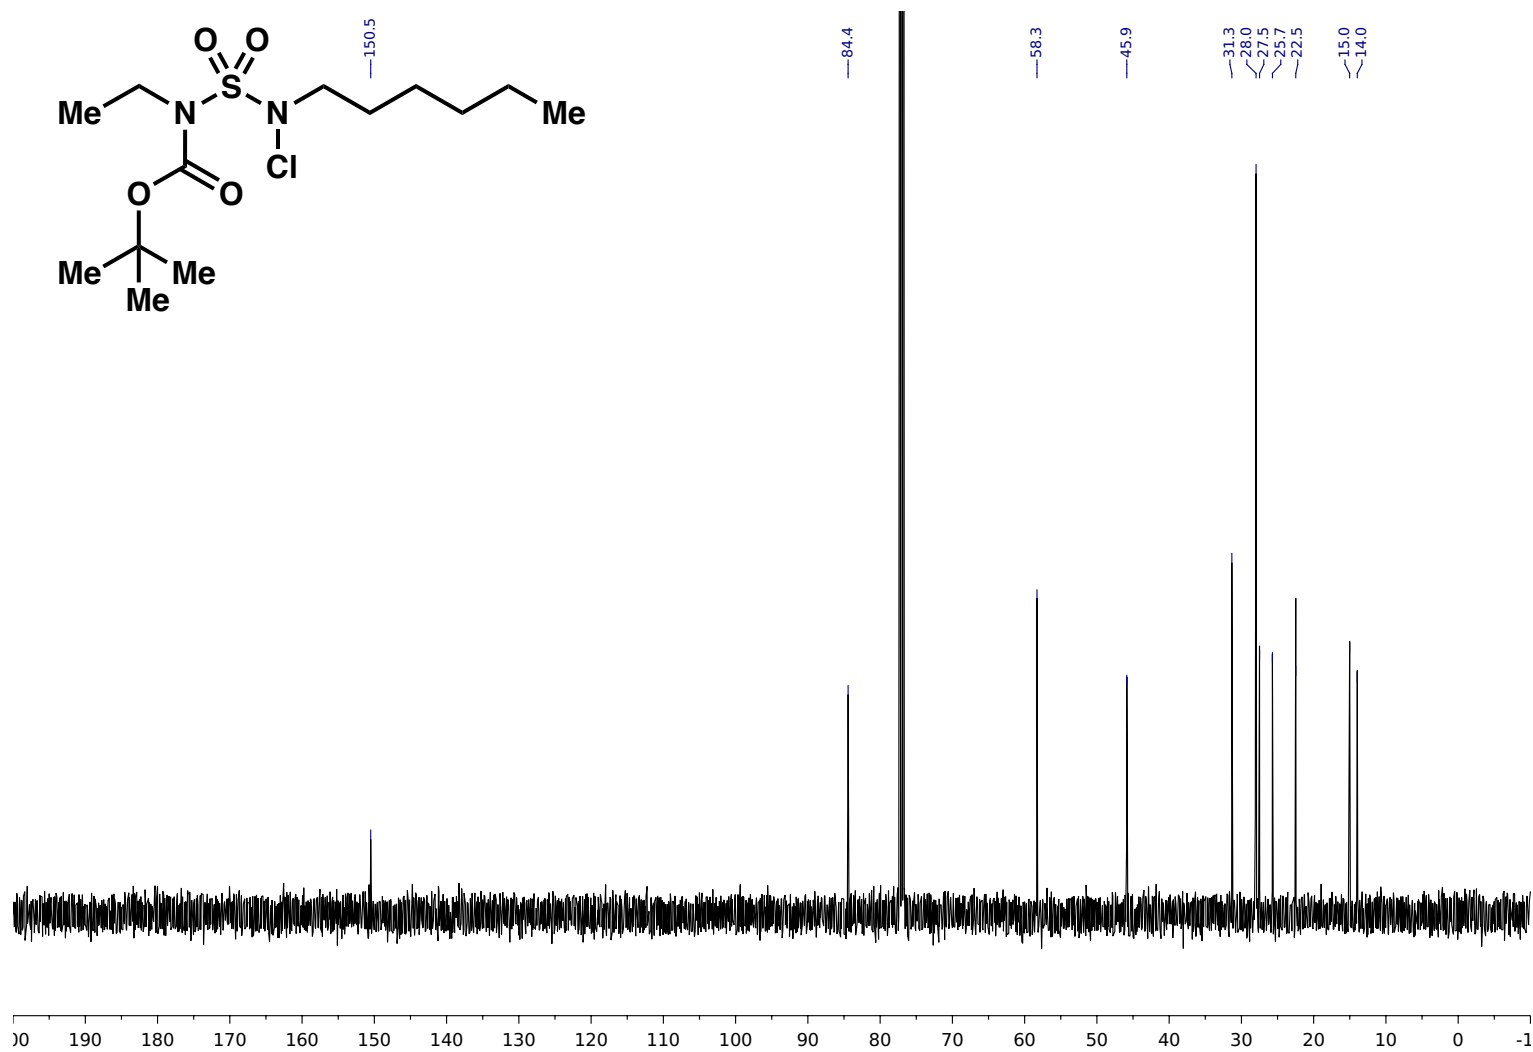

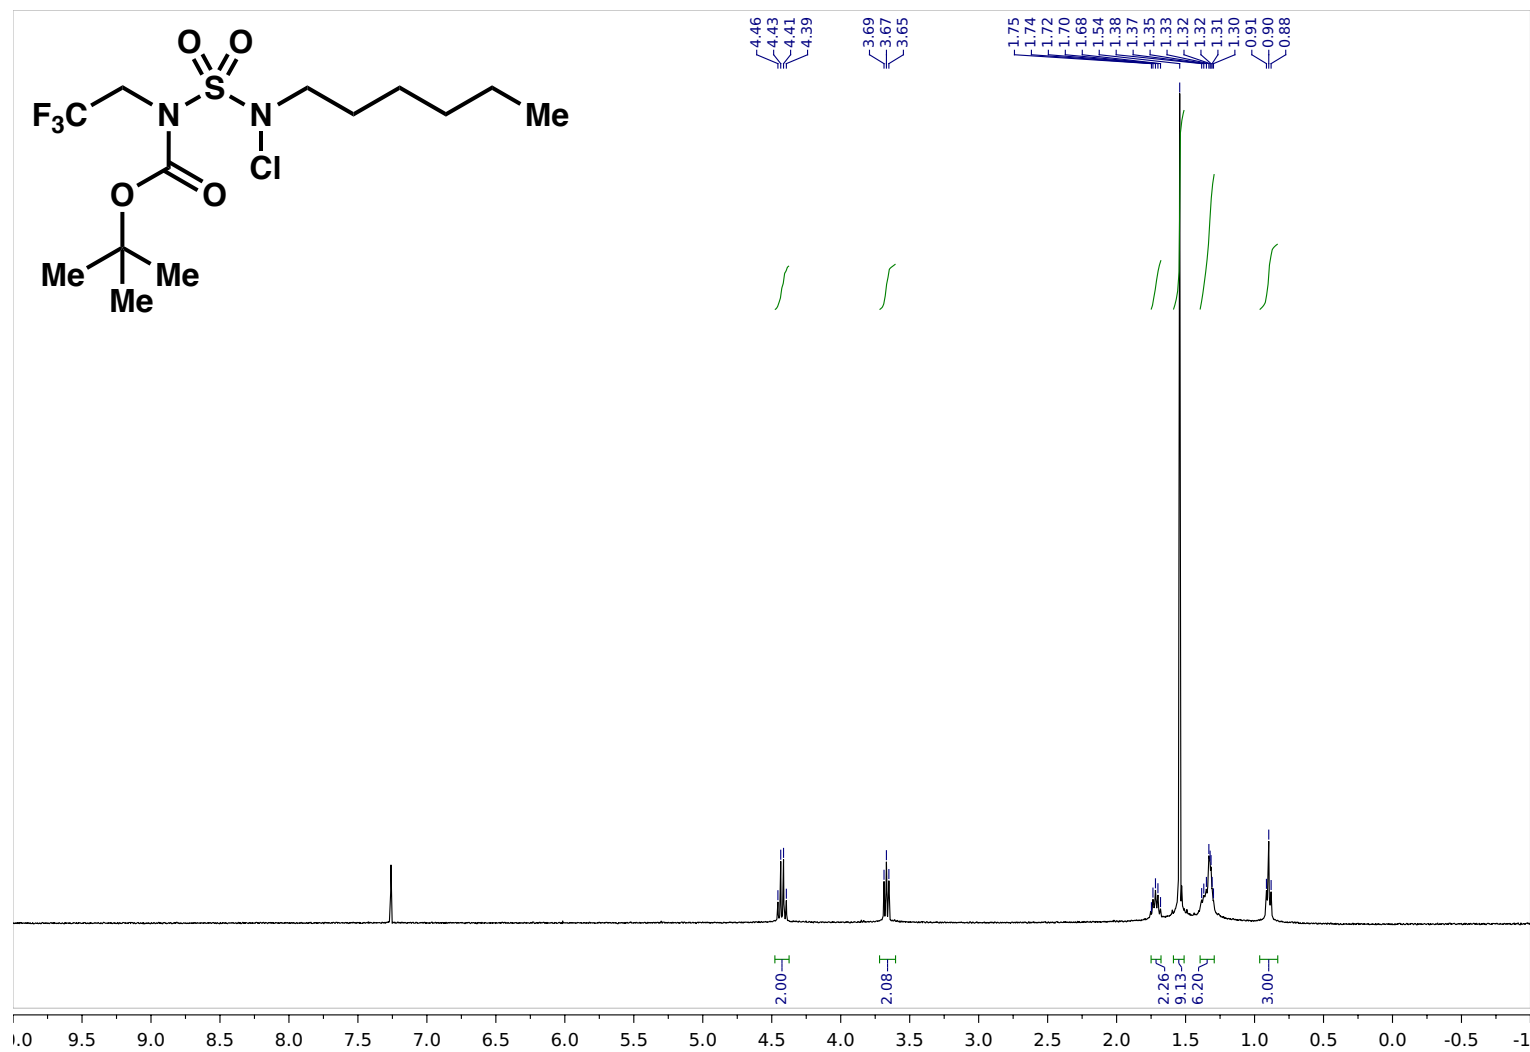

<sup>1</sup>H NMR (400 MHz, CDCl<sub>3</sub>) for *N*-*tert*-butoxycarbonyl-*N'*-chloro-*N'*-hexyl-*N*-(2,2,2-trifluoro)ethylsulfamide (**5b**)

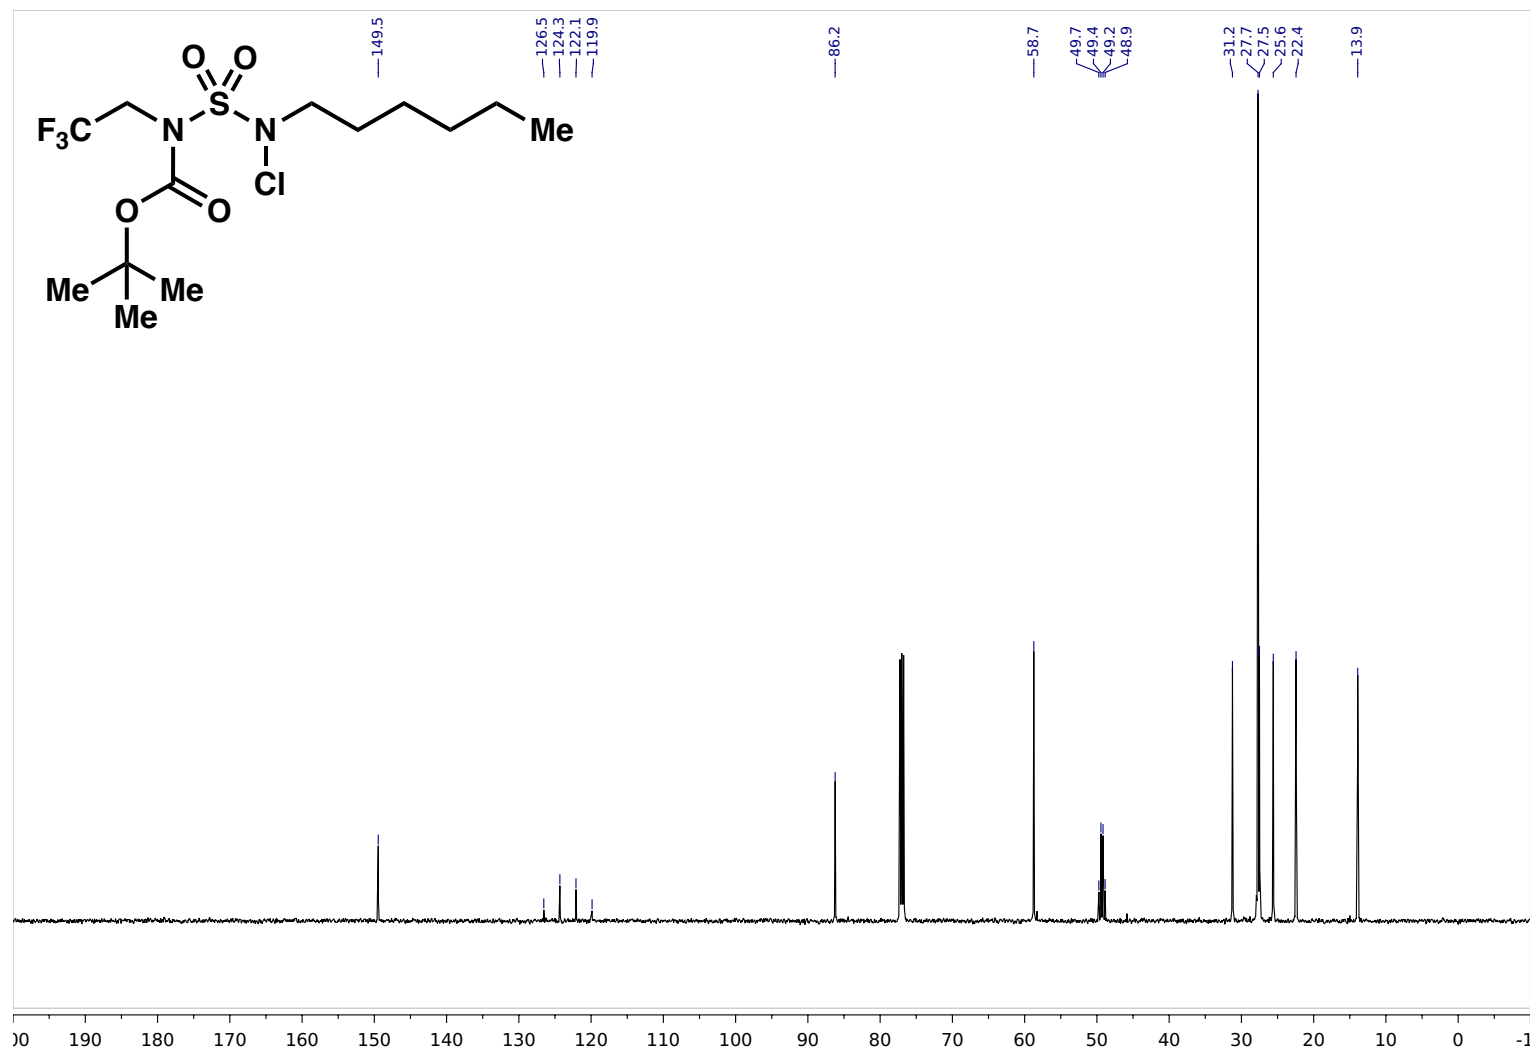

<sup>13</sup>C NMR (126 MHz, CDCl<sub>3</sub>) for *N*-*tert*-butoxycarbonyl-*N'*-chloro-*N'*-hexyl-*N*-(2,2,2-trifluoro)ethylsulfamide (**5b**)

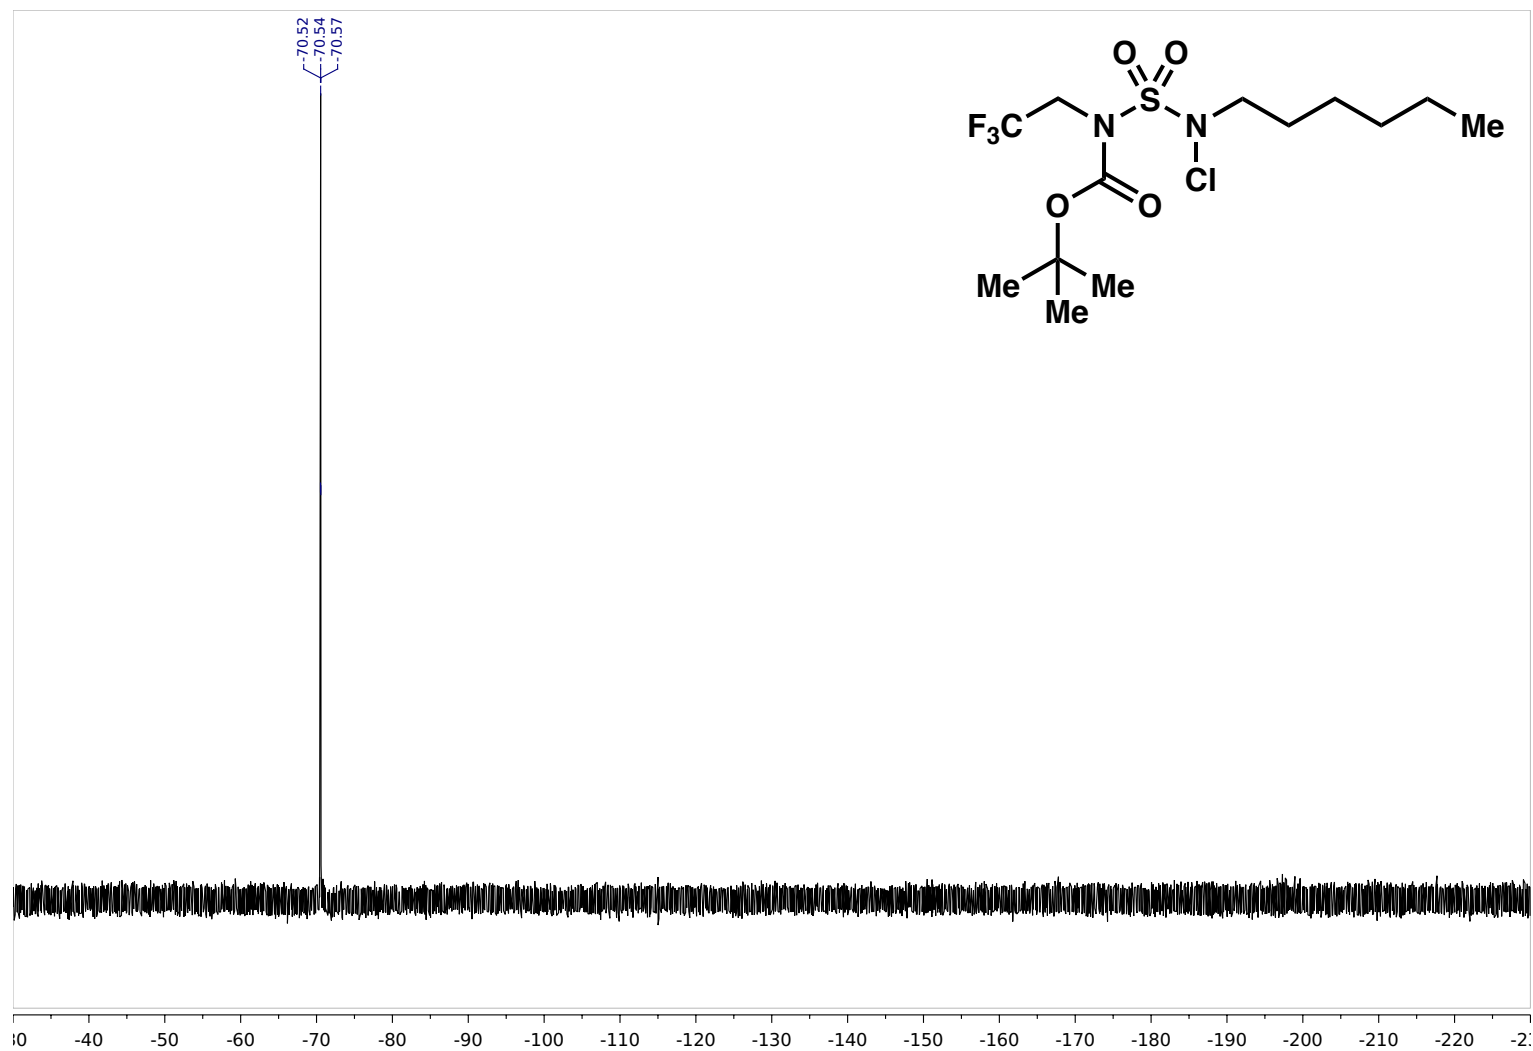

$^{19}\text{F}$  NMR (376 MHz,  $\text{CDCl}_3$ ) for *N*-*tert*-butoxycarbonyl-*N'*-chloro-*N'*-hexyl-*N*-(2,2,2-trifluoro)ethylsulfamide (**5b**)



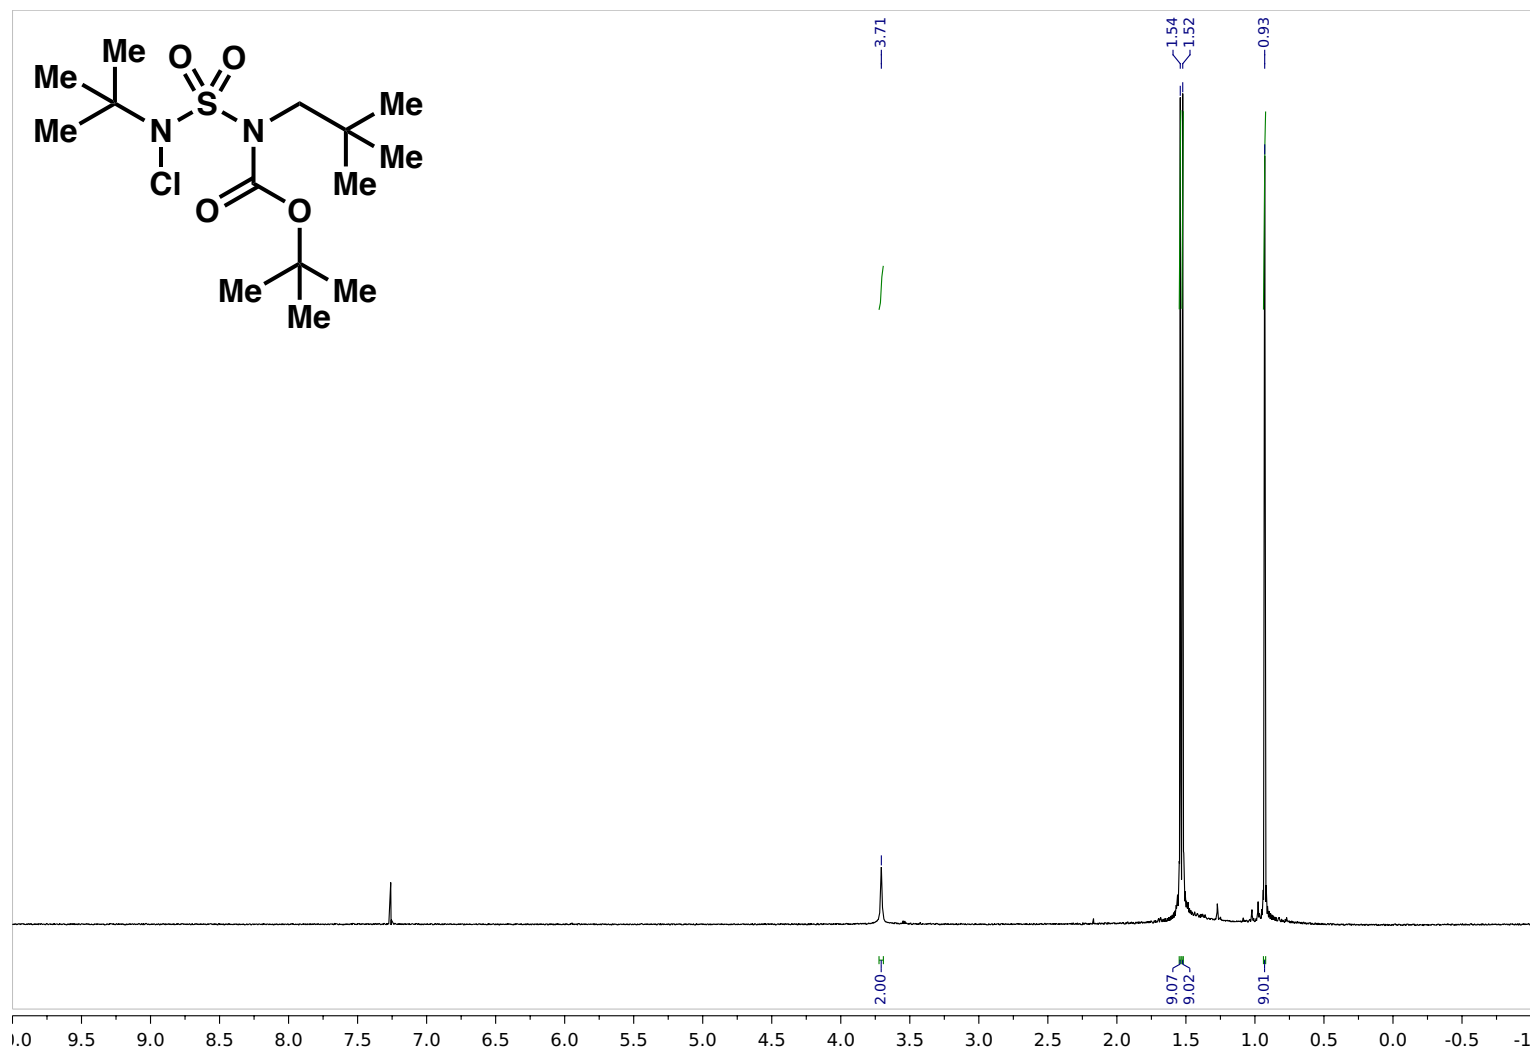

<sup>1</sup>H NMR (400 MHz, CDCl<sub>3</sub>) for *N*-*tert*-butoxycarbonyl-*N'*-*tert*-butyl-*N'*-chloro-*N*-neopentylsulfamide (**1a**)

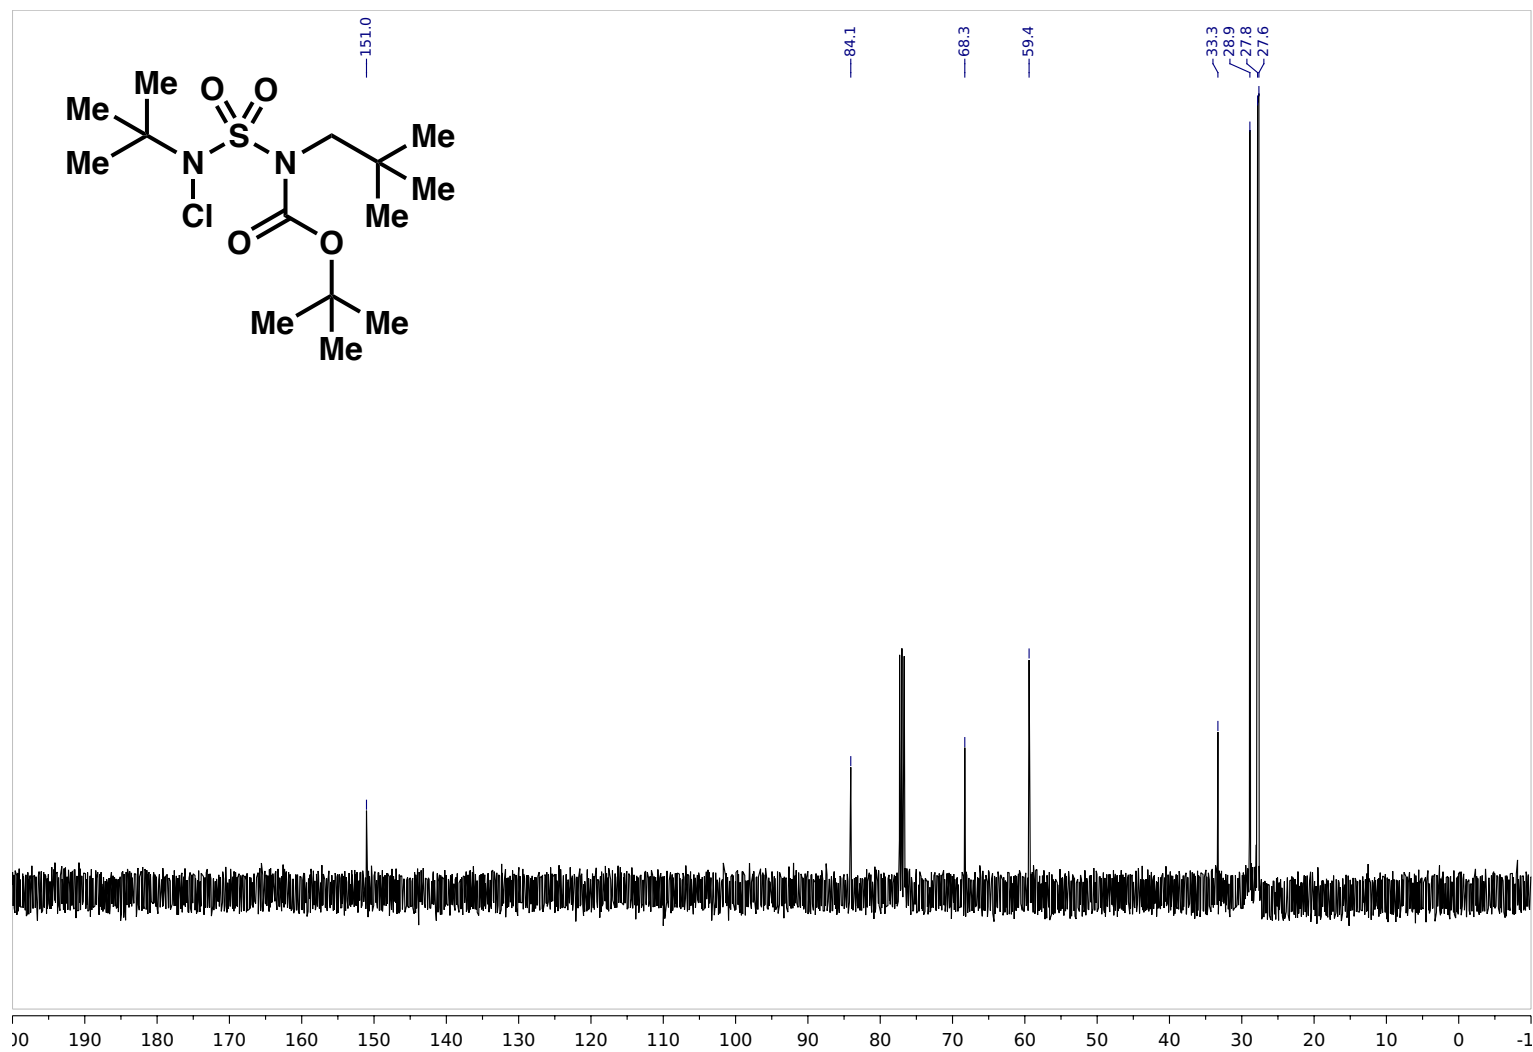

<sup>13</sup>C NMR (101 MHz, CDCl<sub>3</sub>) for *N*-*tert*-butoxycarbonyl-*N'*-*tert*-butyl-*N'*-chloro-*N*-neopentylsulfamide (**1a**)

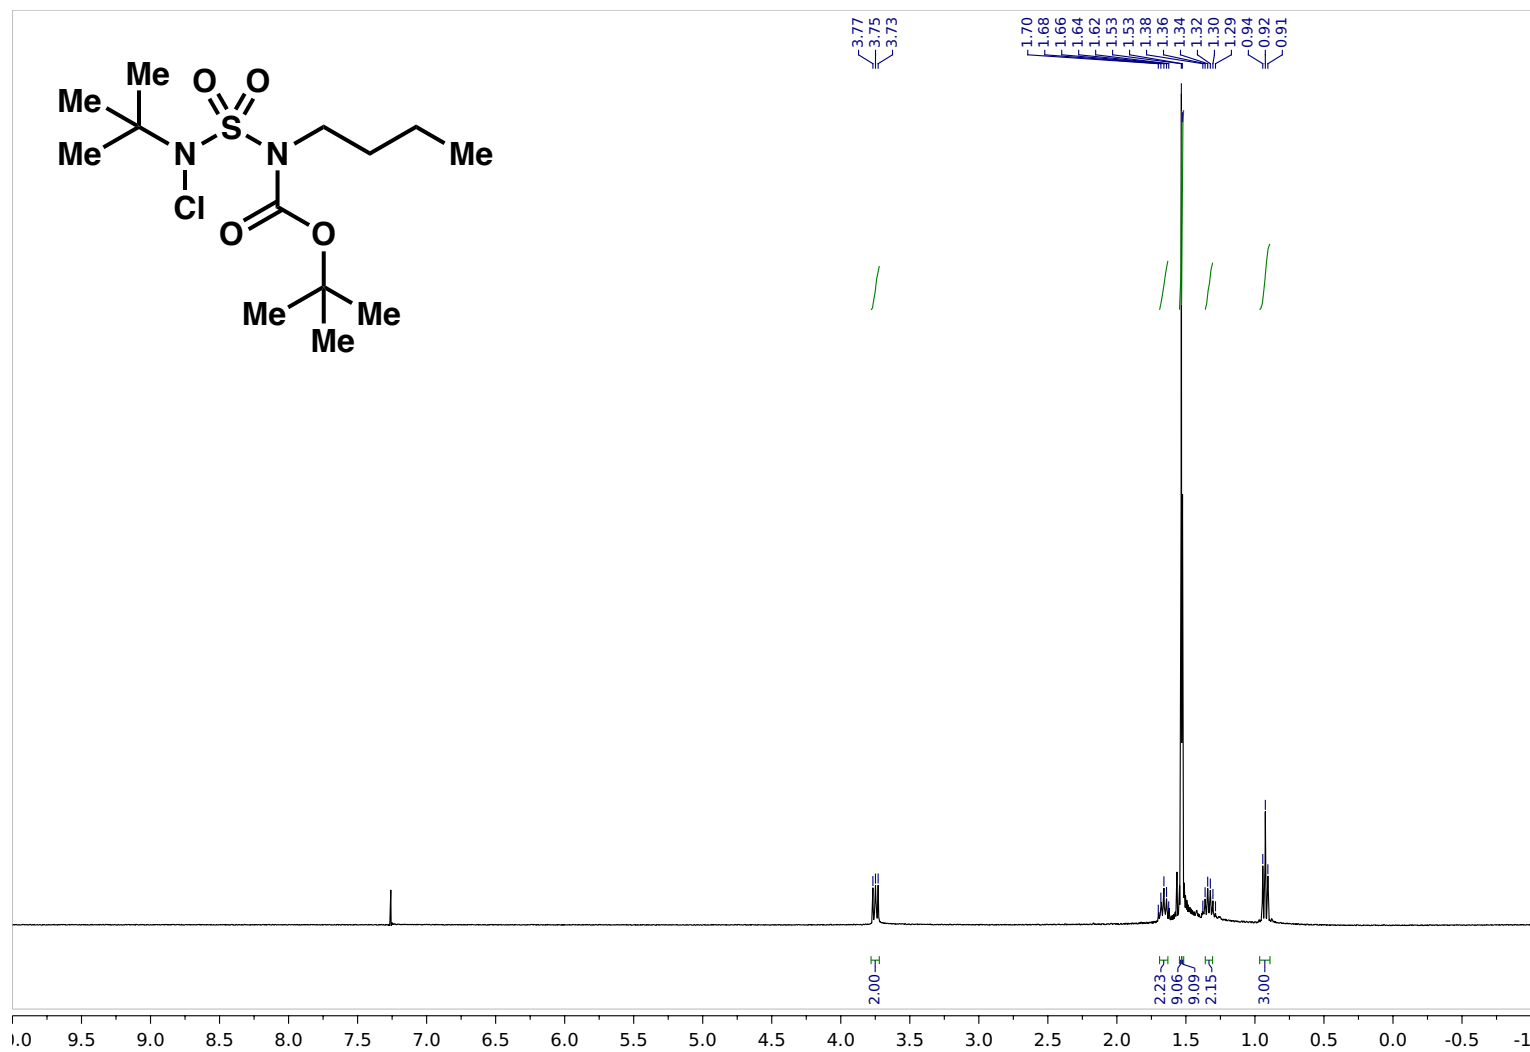

<sup>1</sup>H NMR (CDCl<sub>3</sub>, 400 MHz) for *N*-*tert*-butoxycarbonyl-*N*-butyl-*N'*-*tert*-butyl-*N'*-chlorosulfamide (**1b**)

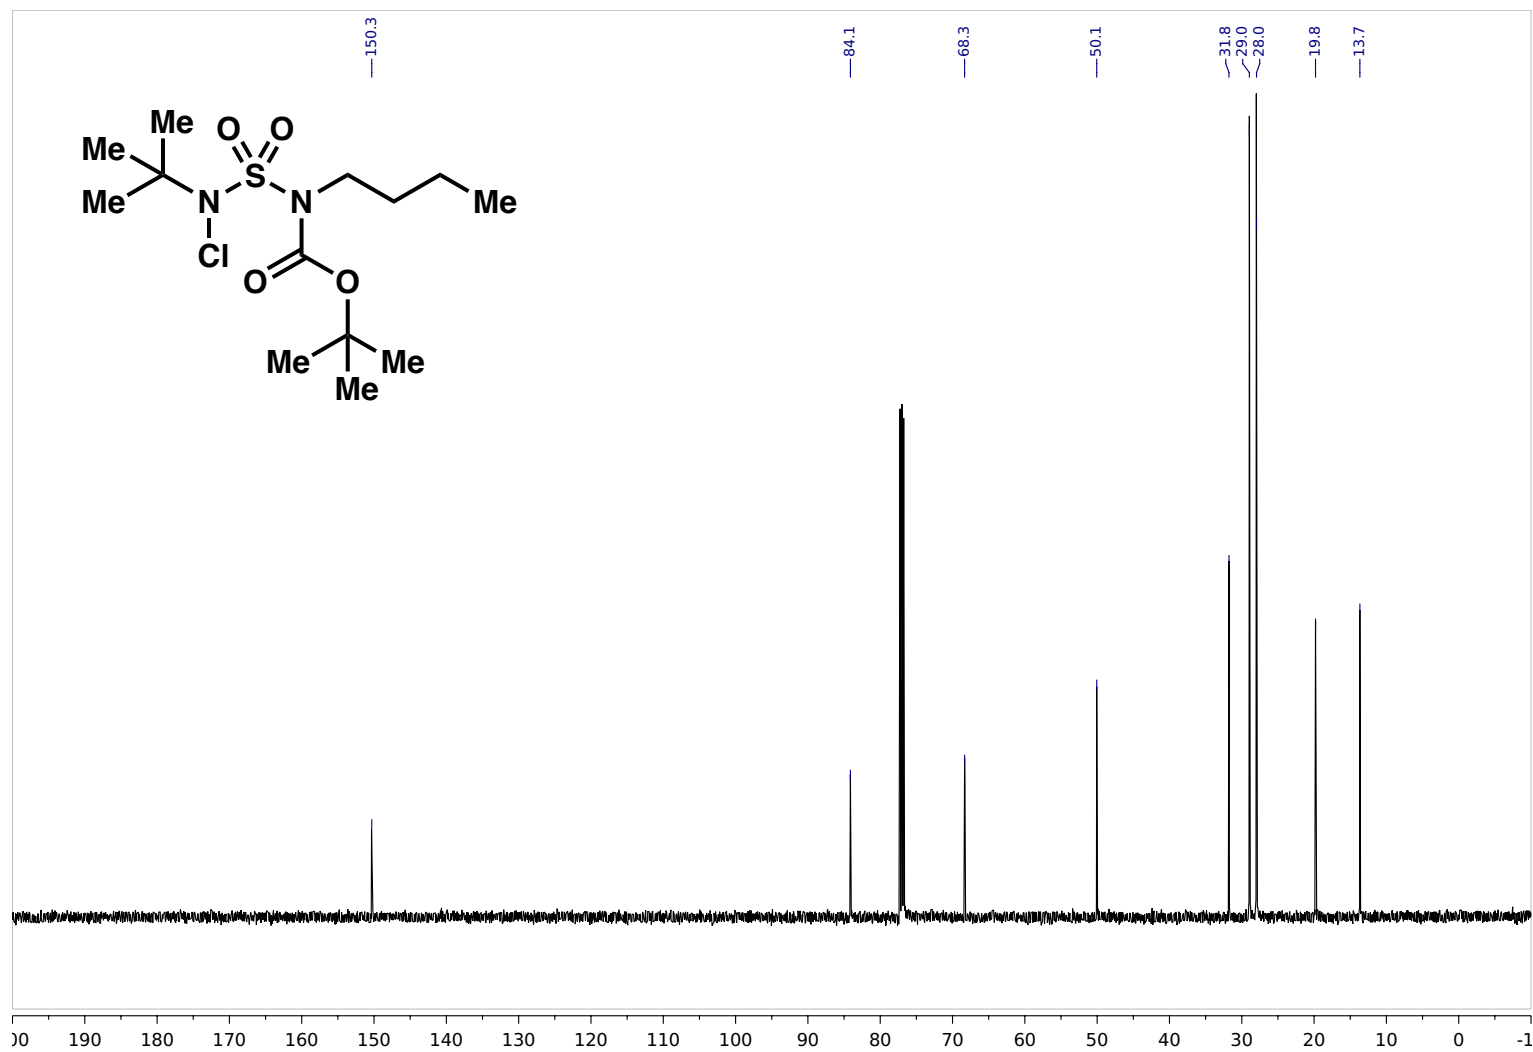

<sup>13</sup>C NMR (CDCl<sub>3</sub>, 126 MHz) for *N*-*tert*-butoxycarbonyl-*N*-butyl-*N'*-*tert*-butyl-*N'*-chlorosulfamide (**1b**)

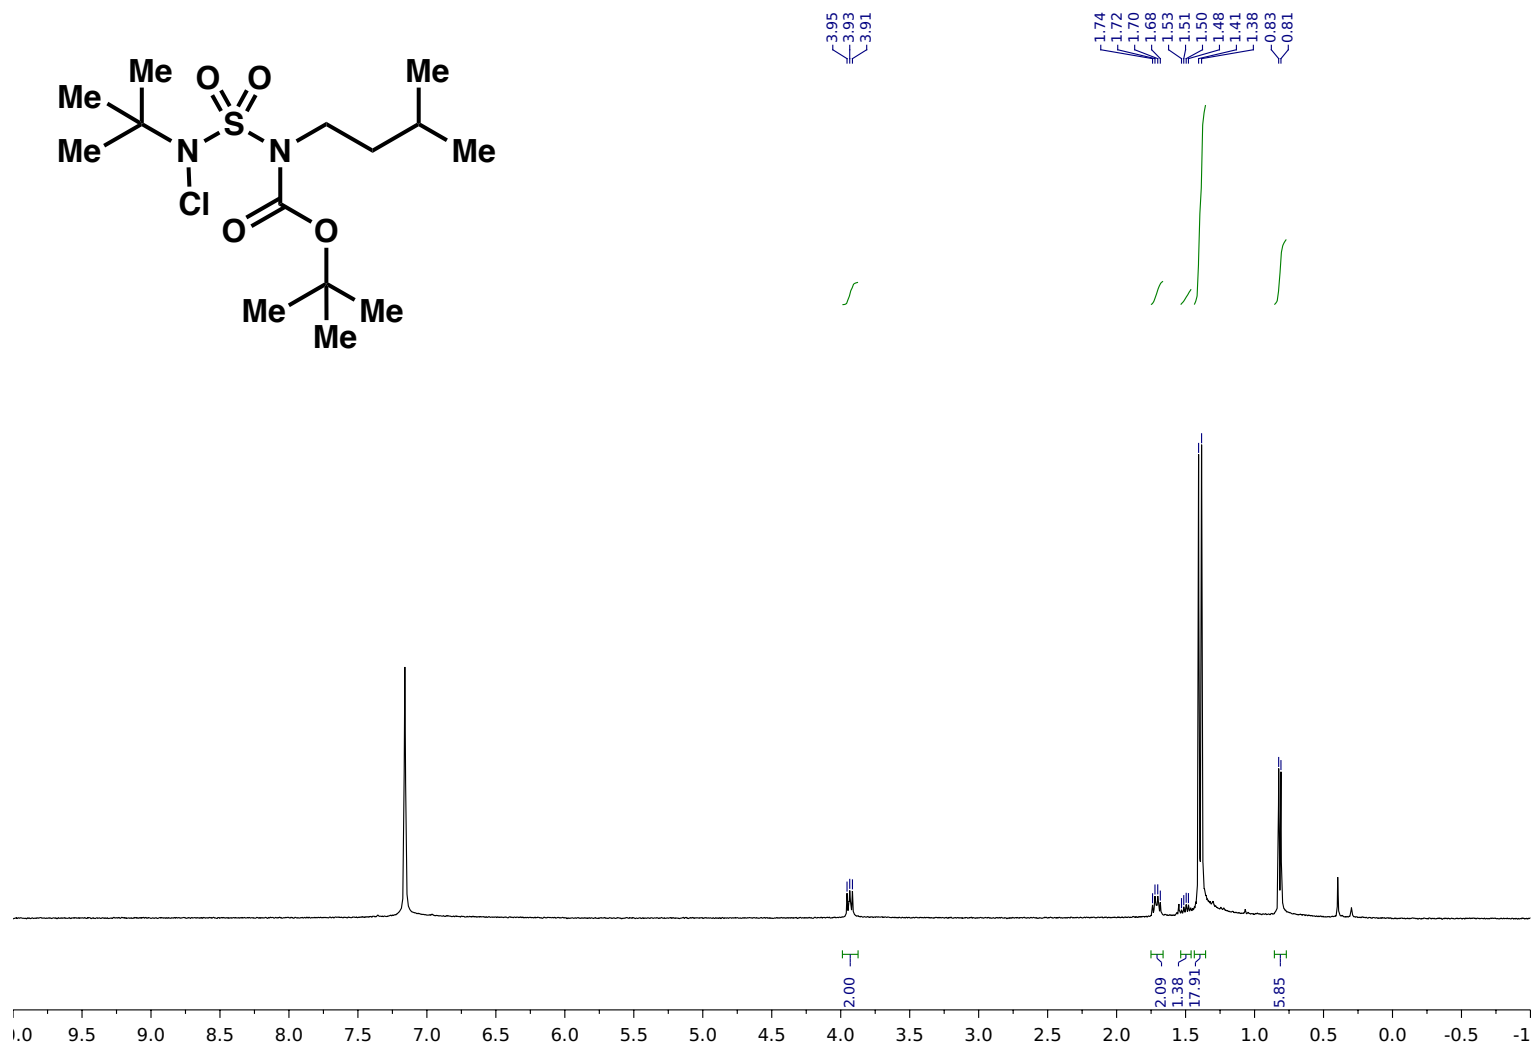

<sup>1</sup>H NMR (C<sub>6</sub>D<sub>6</sub>, 400 MHz) for *N*-*tert*-butoxycarbonyl-*N'*-*tert*-butyl-*N'*-chloro-*N*-isopentylsulfamide (**1c**)

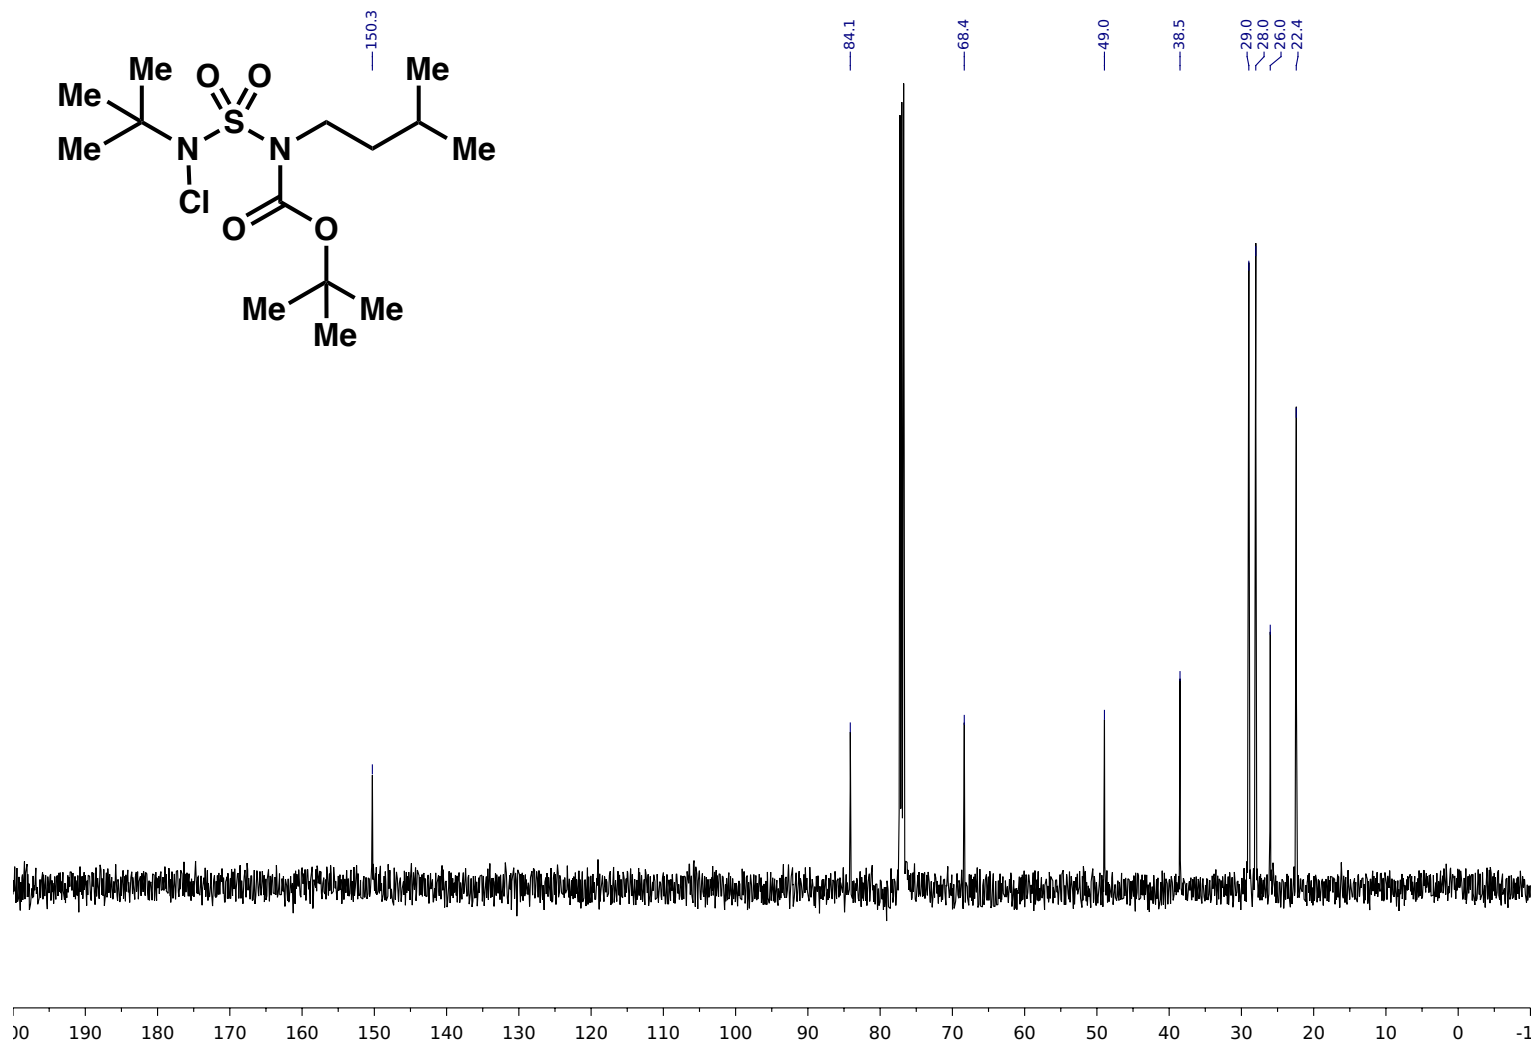

<sup>13</sup>C NMR (CDCl<sub>3</sub>, 126 MHz) for *N*-*tert*-butoxycarbonyl-*N'*-*tert*-butyl-*N'*-chloro-*N*-isopentylsulfamide (**1c**)

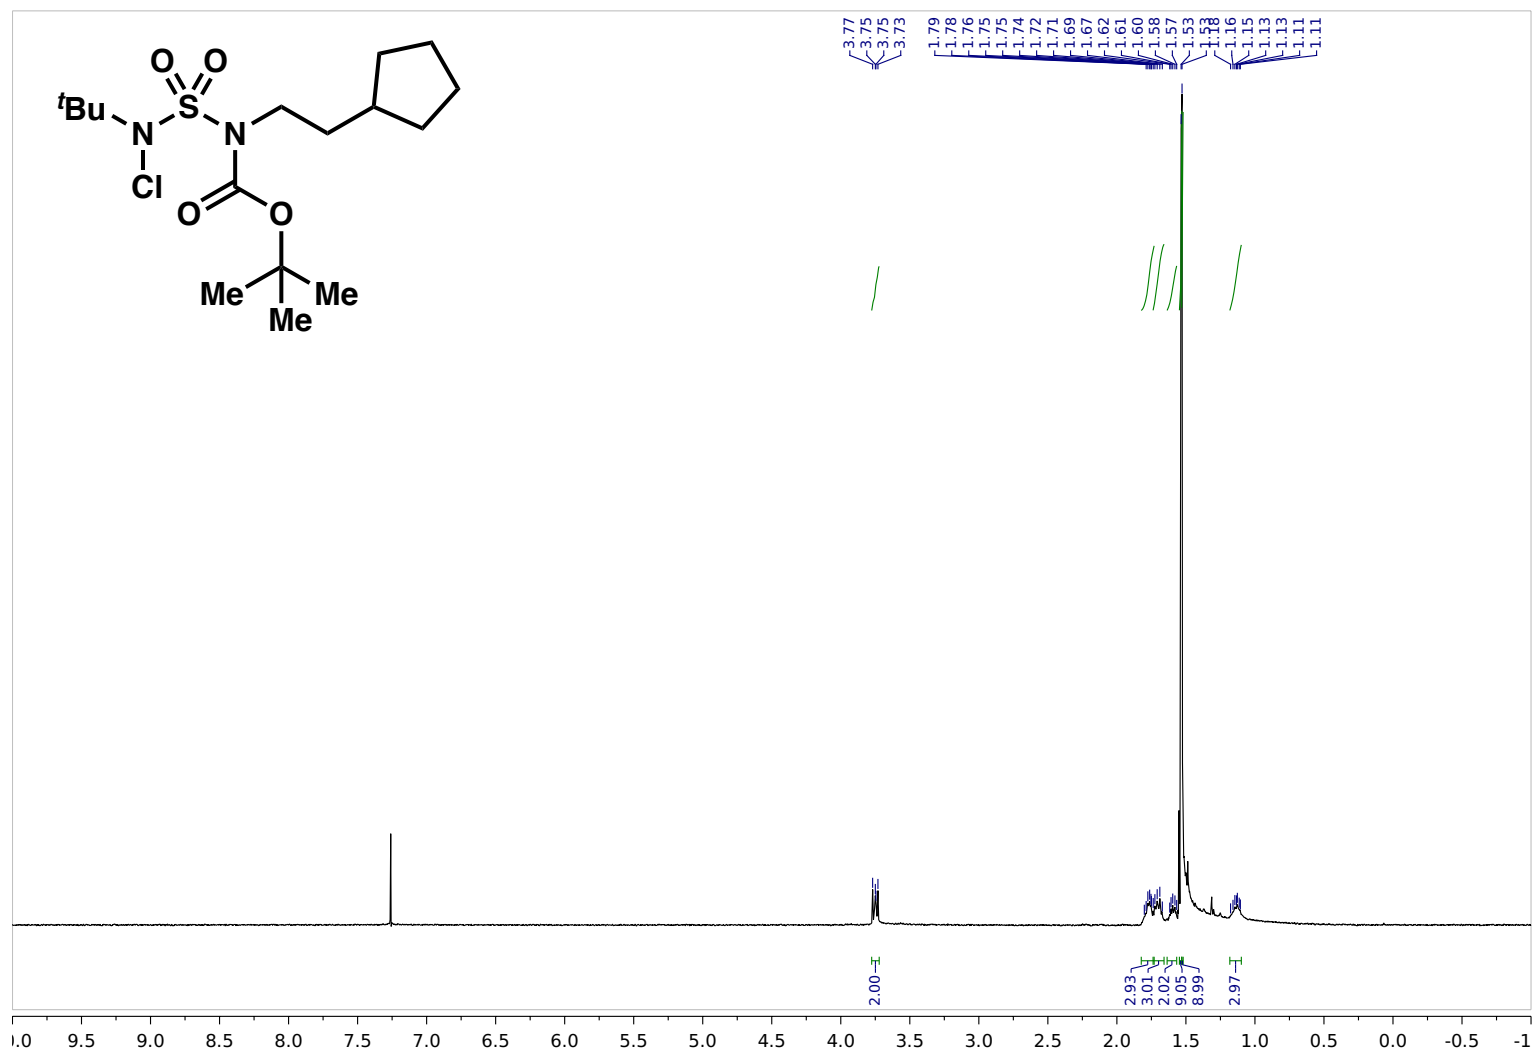

<sup>1</sup>H NMR (400 MHz, CDCl<sub>3</sub>) for *N*-*tert*-butoxycarbonyl-*N'*-*tert*-butyl-*N'*-chloro-*N*-(2-(cyclopentyl)ethyl)sulfamide (**1d**)

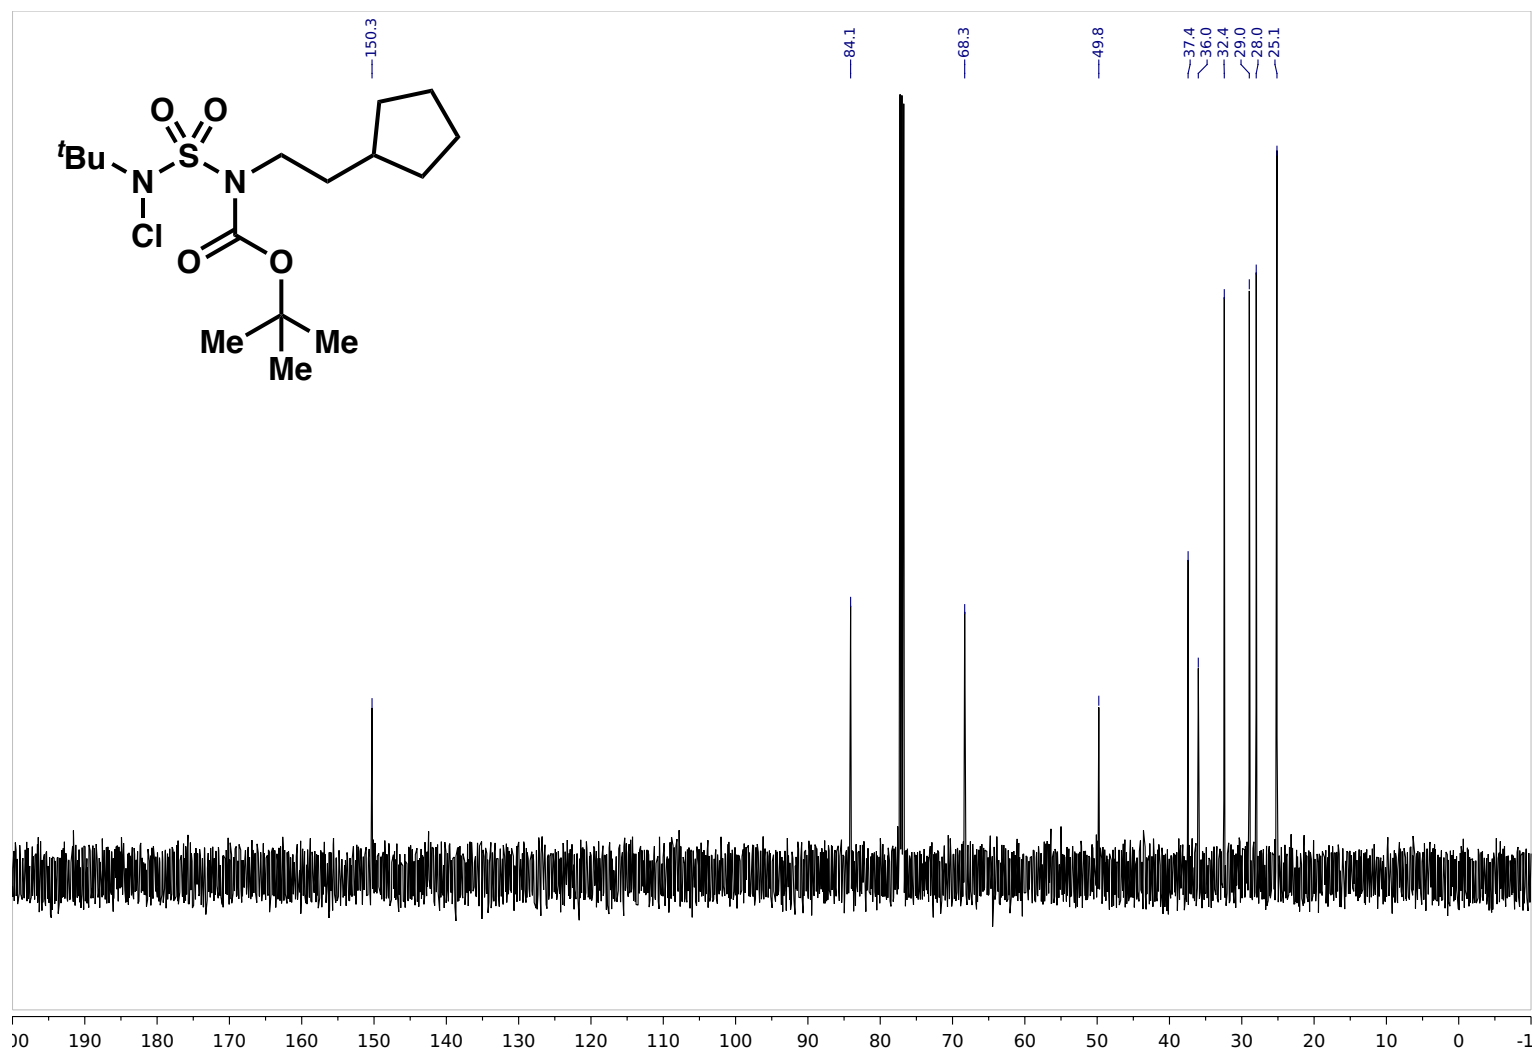

<sup>13</sup>C NMR (126 MHz, CDCl<sub>3</sub>) for *N*-*tert*-butoxycarbonyl-*N'*-*tert*-butyl-*N'*-chloro-*N*-(2-(cyclopentyl)ethyl)sulfamide (**1d**)



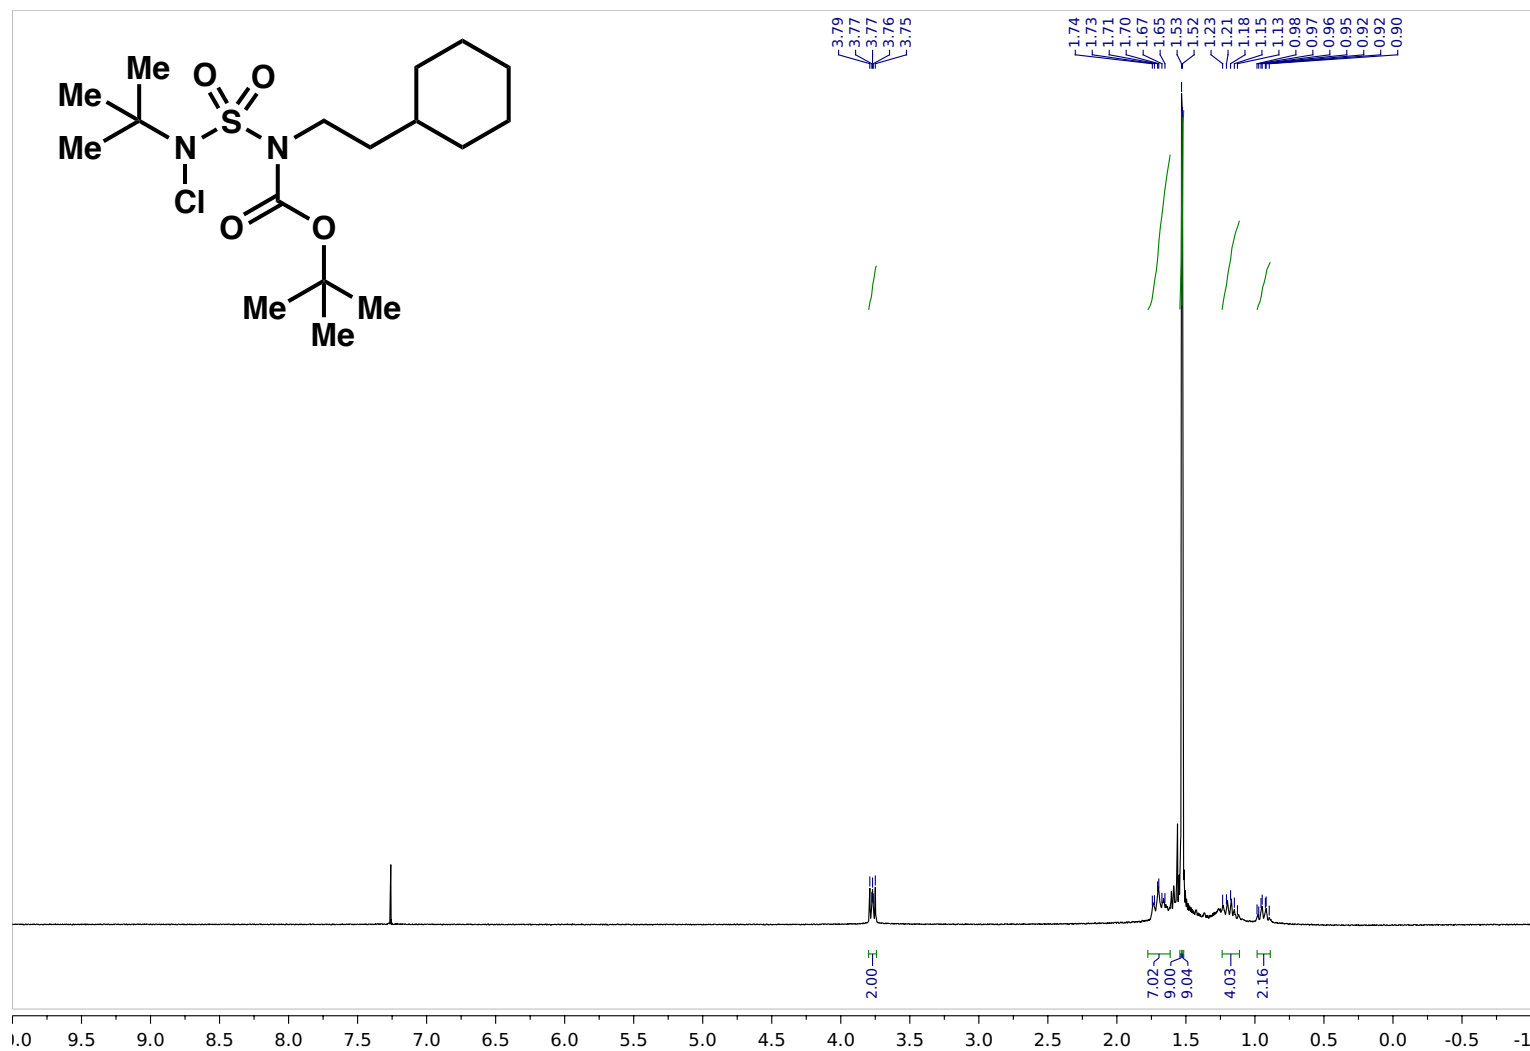

<sup>1</sup>H NMR (400 MHz, CDCl<sub>3</sub>) for *N*-tert-butoxycarbonyl-*N'*-tert-butyl-*N'*-chloro-*N*-(2-(cyclohexyl)ethyl)sulfamide (**1e**)

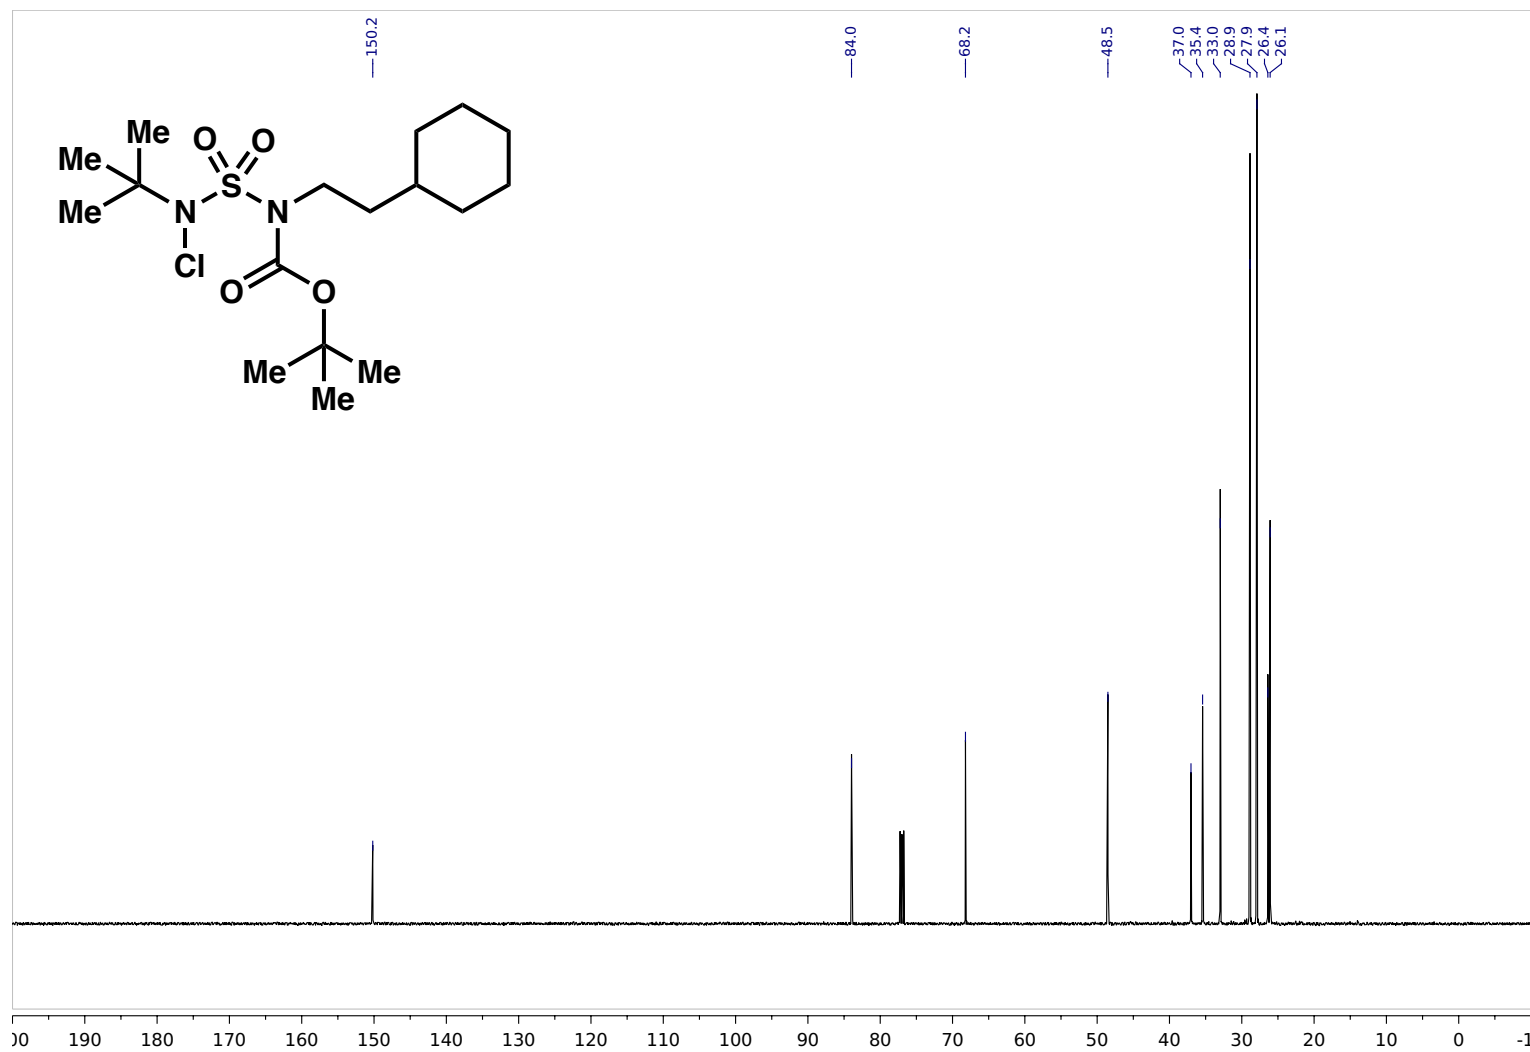

<sup>13</sup>C NMR (126 MHz, CDCl<sub>3</sub>) for *N*-*tert*-butoxycarbonyl-*N'*-*tert*-butyl-*N'*-chloro-*N*-(2-(cyclohexyl)ethyl)sulfamide (**1e**)

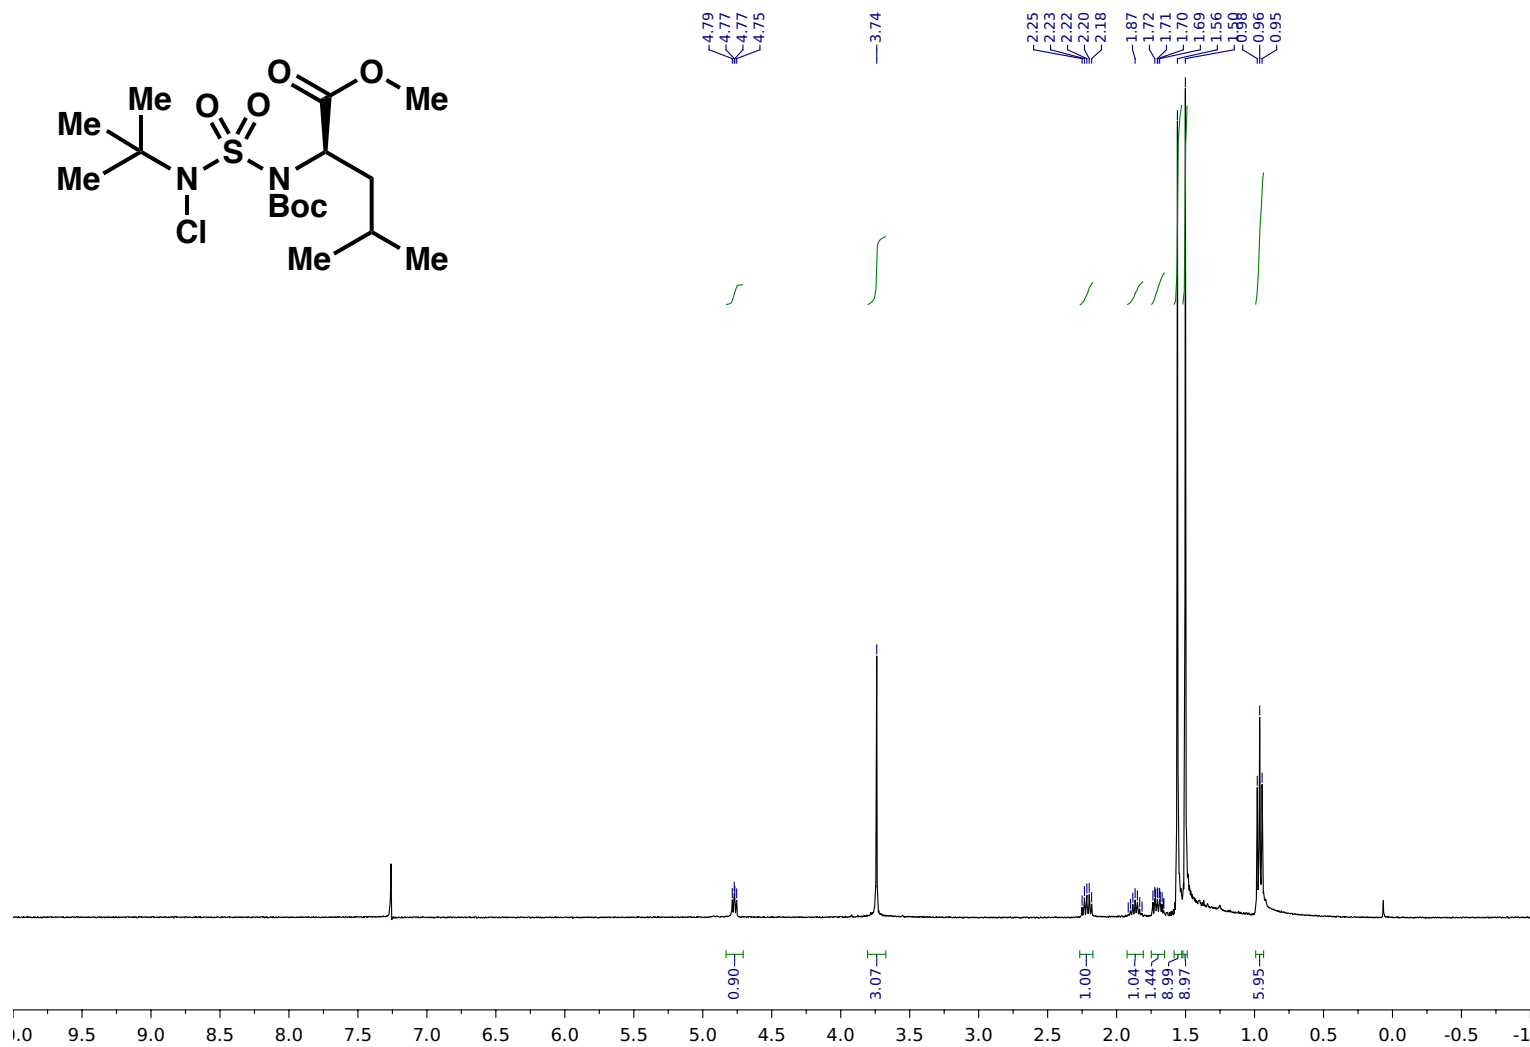

<sup>1</sup>H NMR (400 MHz, CDCl<sub>3</sub>) for *N*-*tert*-butoxycarbonyl-*N'*-*tert*-butyl-*N'*-chloro-*N*-((2*R*)-methyl 4-methylpentano-2-yl)sulfamide (**1f**)

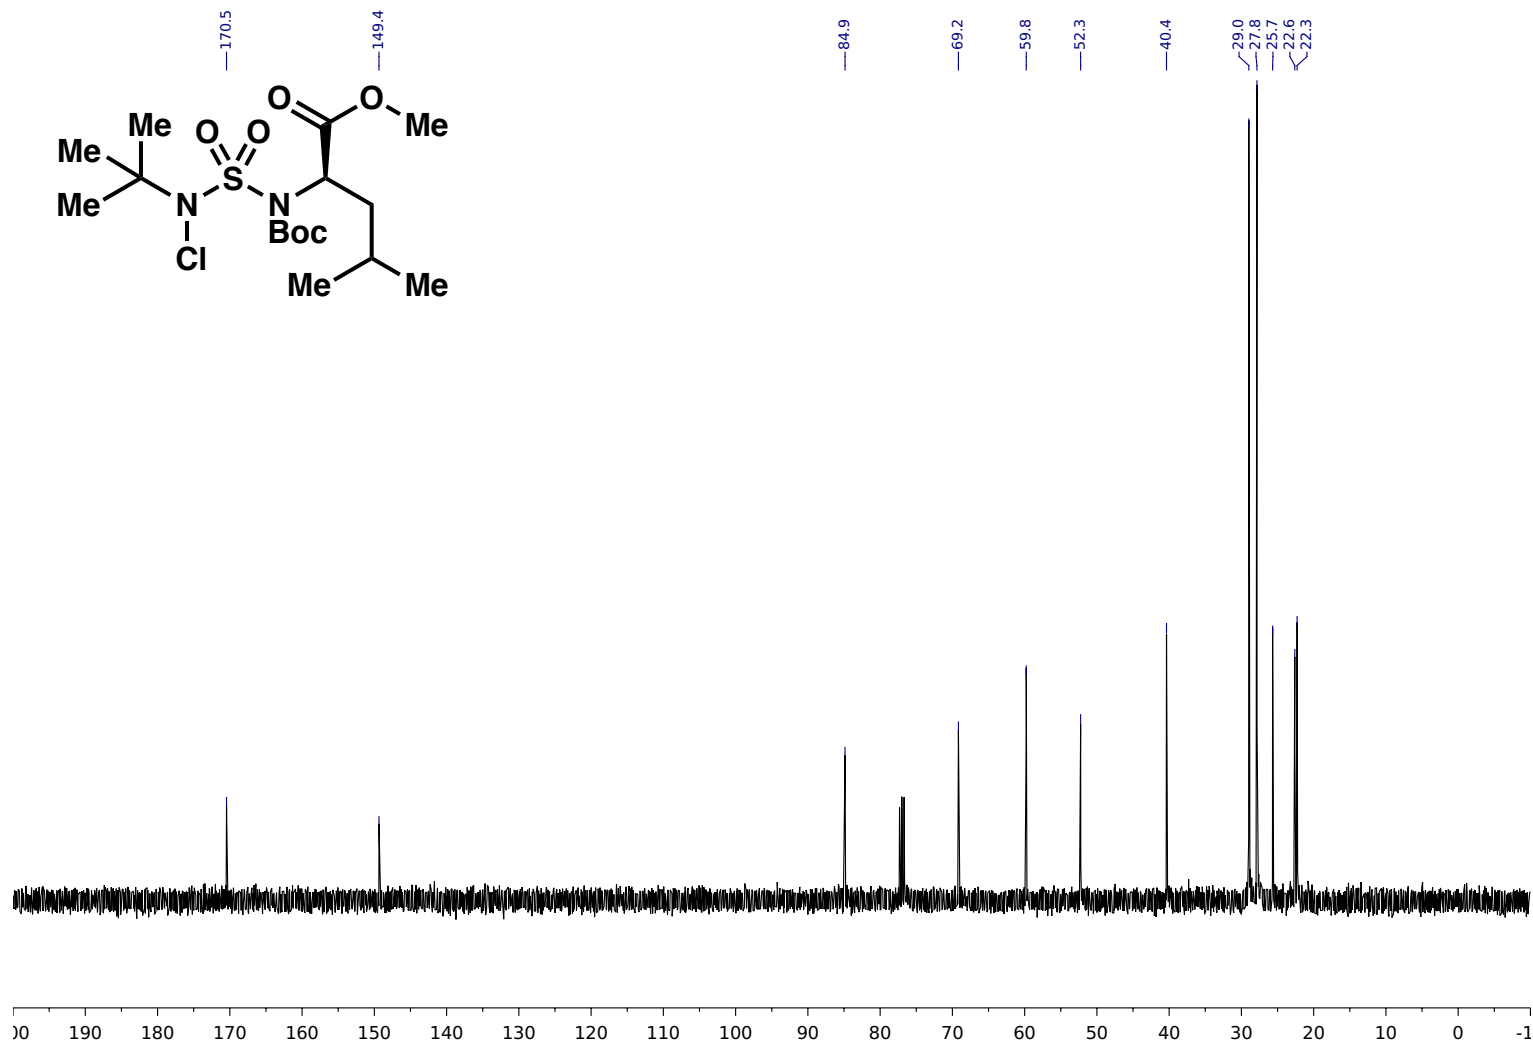

<sup>13</sup>C NMR (101 MHz, CDCl<sub>3</sub>) for *N*-*tert*-butoxycarbonyl-*N'*-*tert*-butyl-*N'*-chloro-*N*-((2*R*)-methyl 4-methylpentano-2-yl)sulfamide (**1f**)

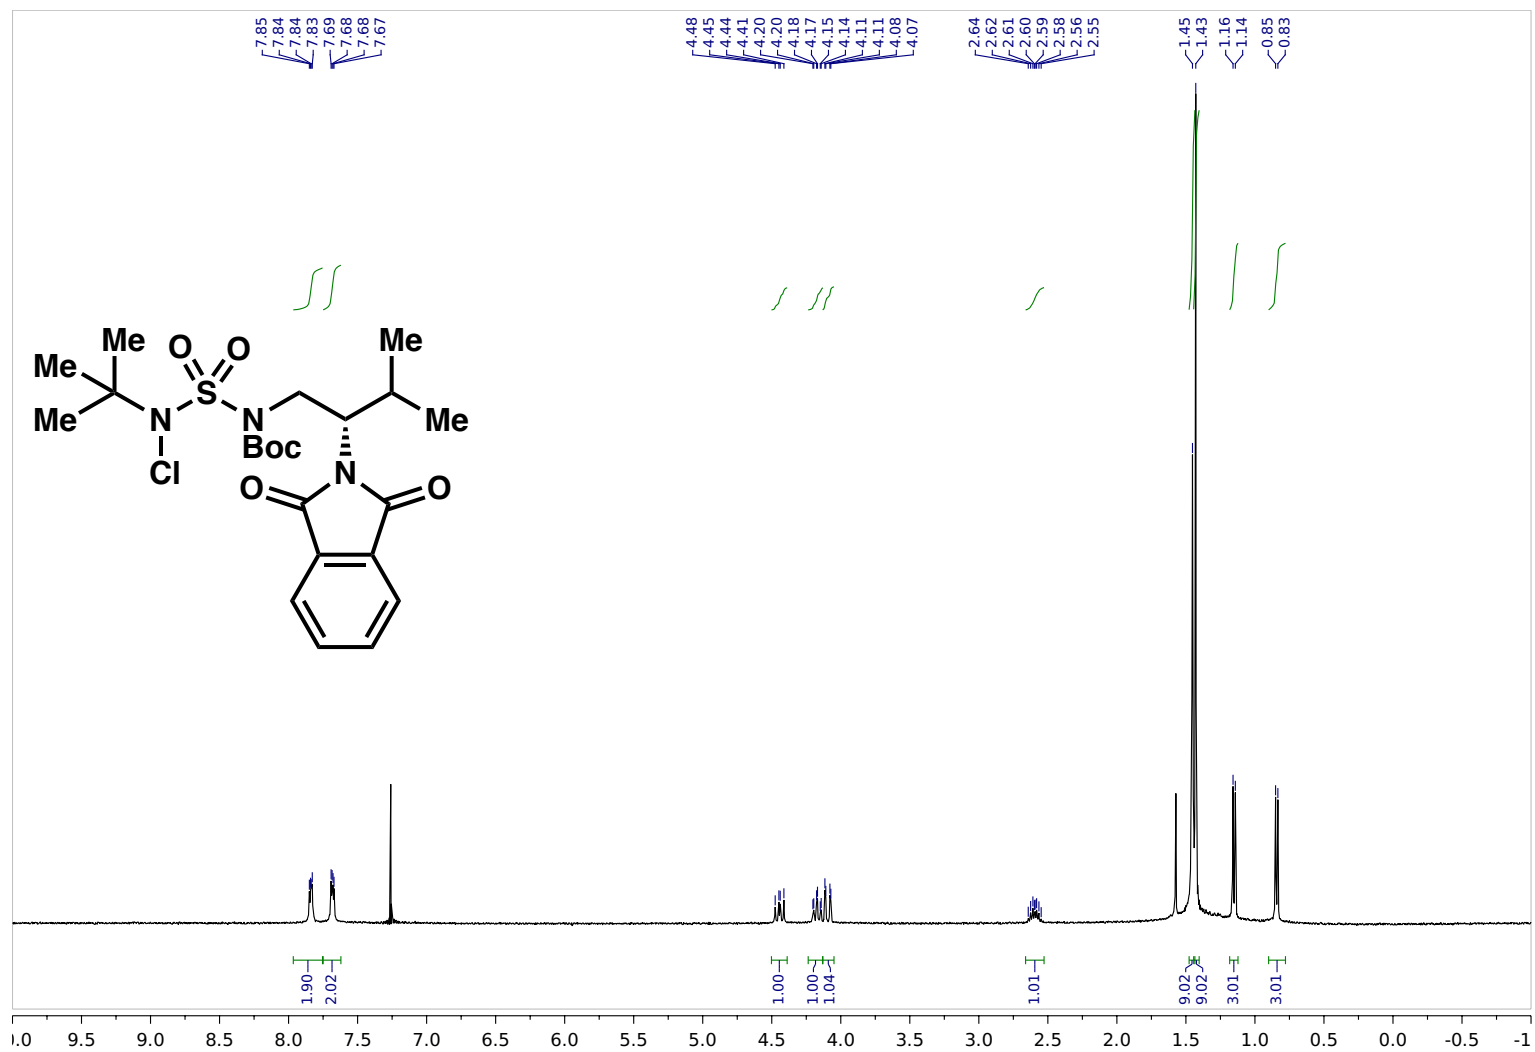

<sup>1</sup>H NMR (400 MHz, CDCl<sub>3</sub>) for *N*-*tert*-butoxycarbonyl-*N'*-*tert*-butyl-*N'*-chloro-*N*-((*S*)-2-(1,3-dioxisoindolin-2-yl)-3-methylbutyl)sulfamide (**1g**)

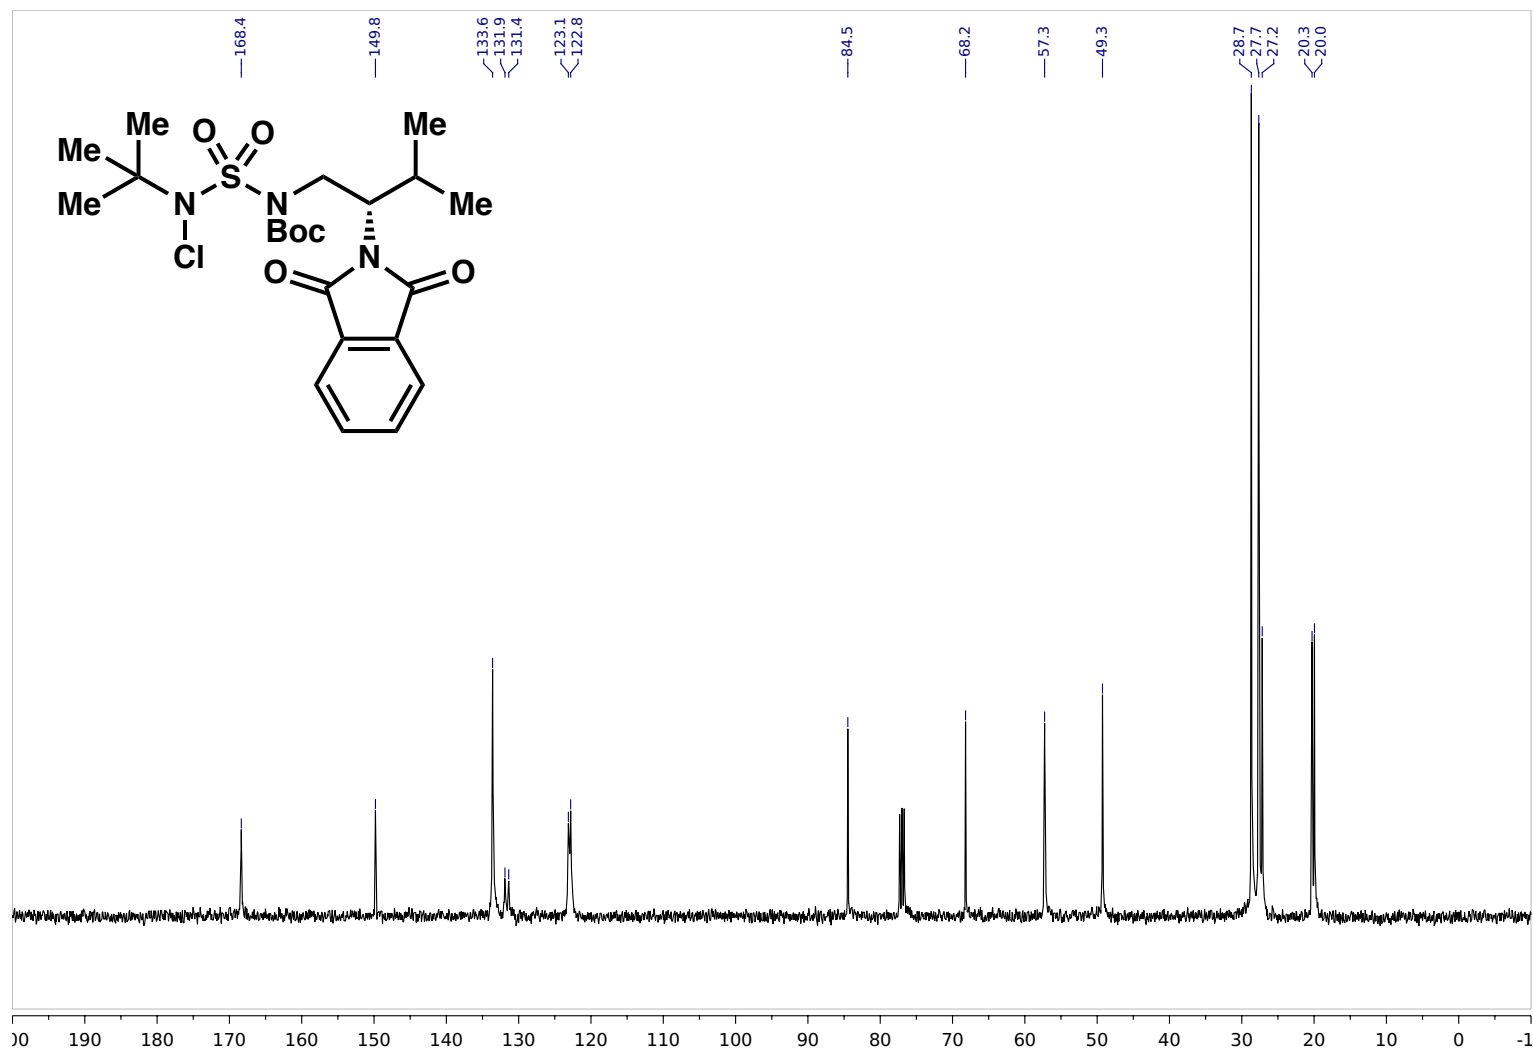

<sup>13</sup>C NMR (101 MHz, CDCl<sub>3</sub>) for *N*-*tert*-butoxycarbonyl-*N'*-*tert*-butyl-*N'*-chloro-*N*-((*S*)-2-(1,3-dioxisoindolin-2-yl)-3-methylbutyl)sulfamide (**1g**)

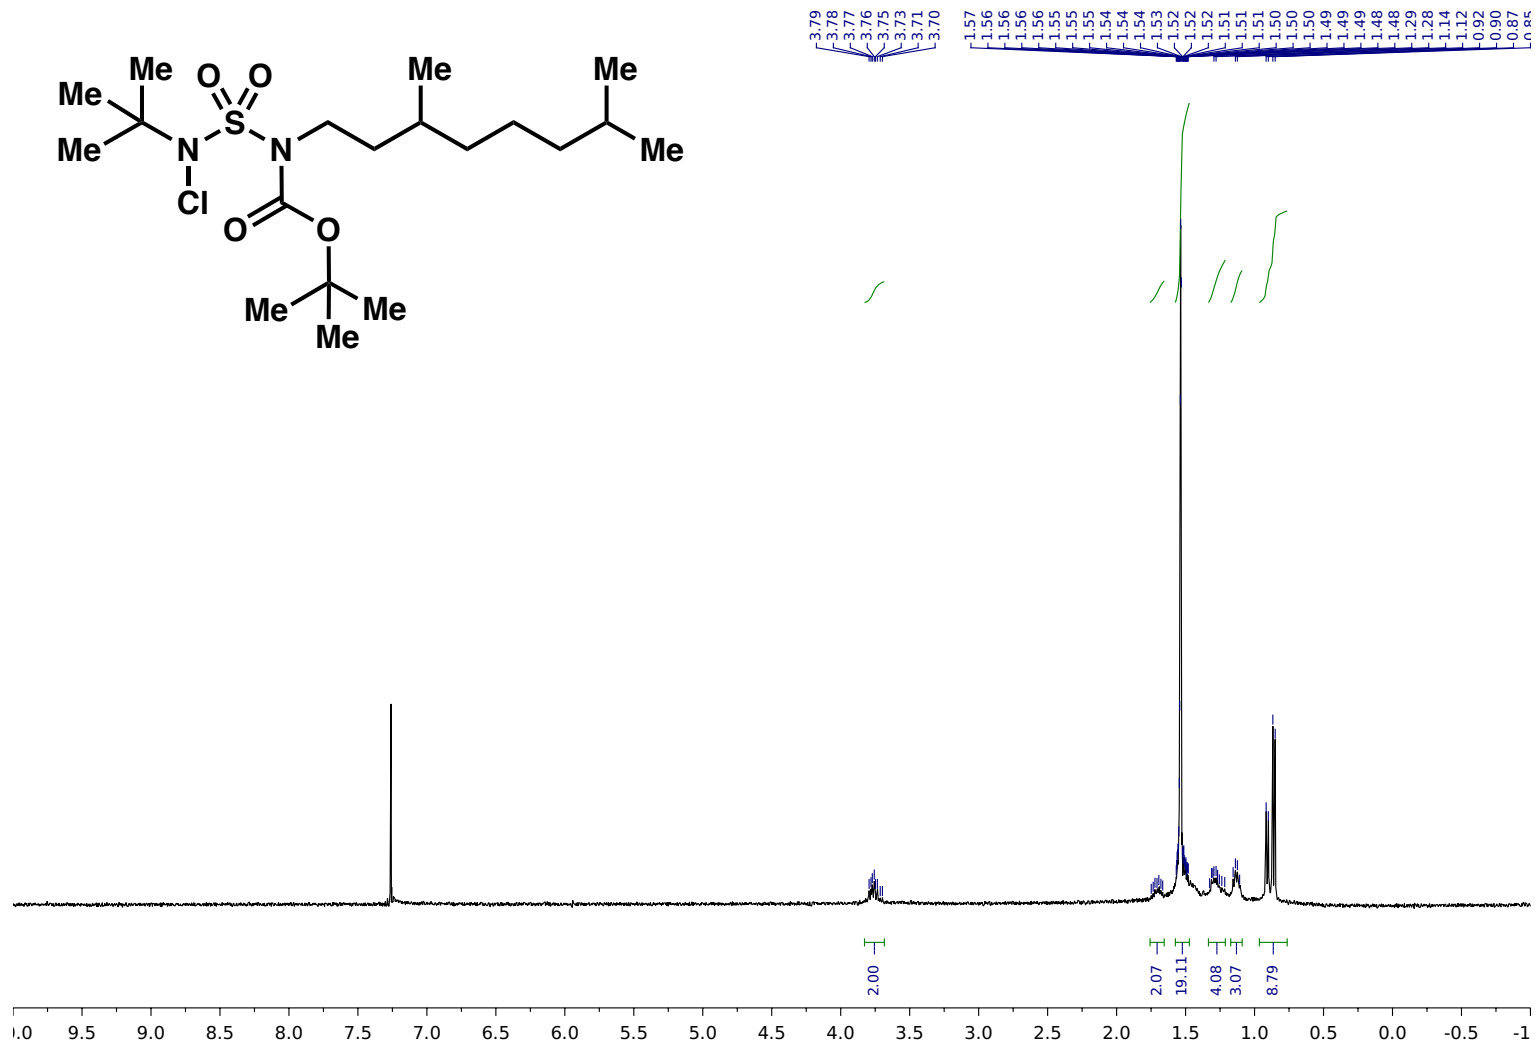

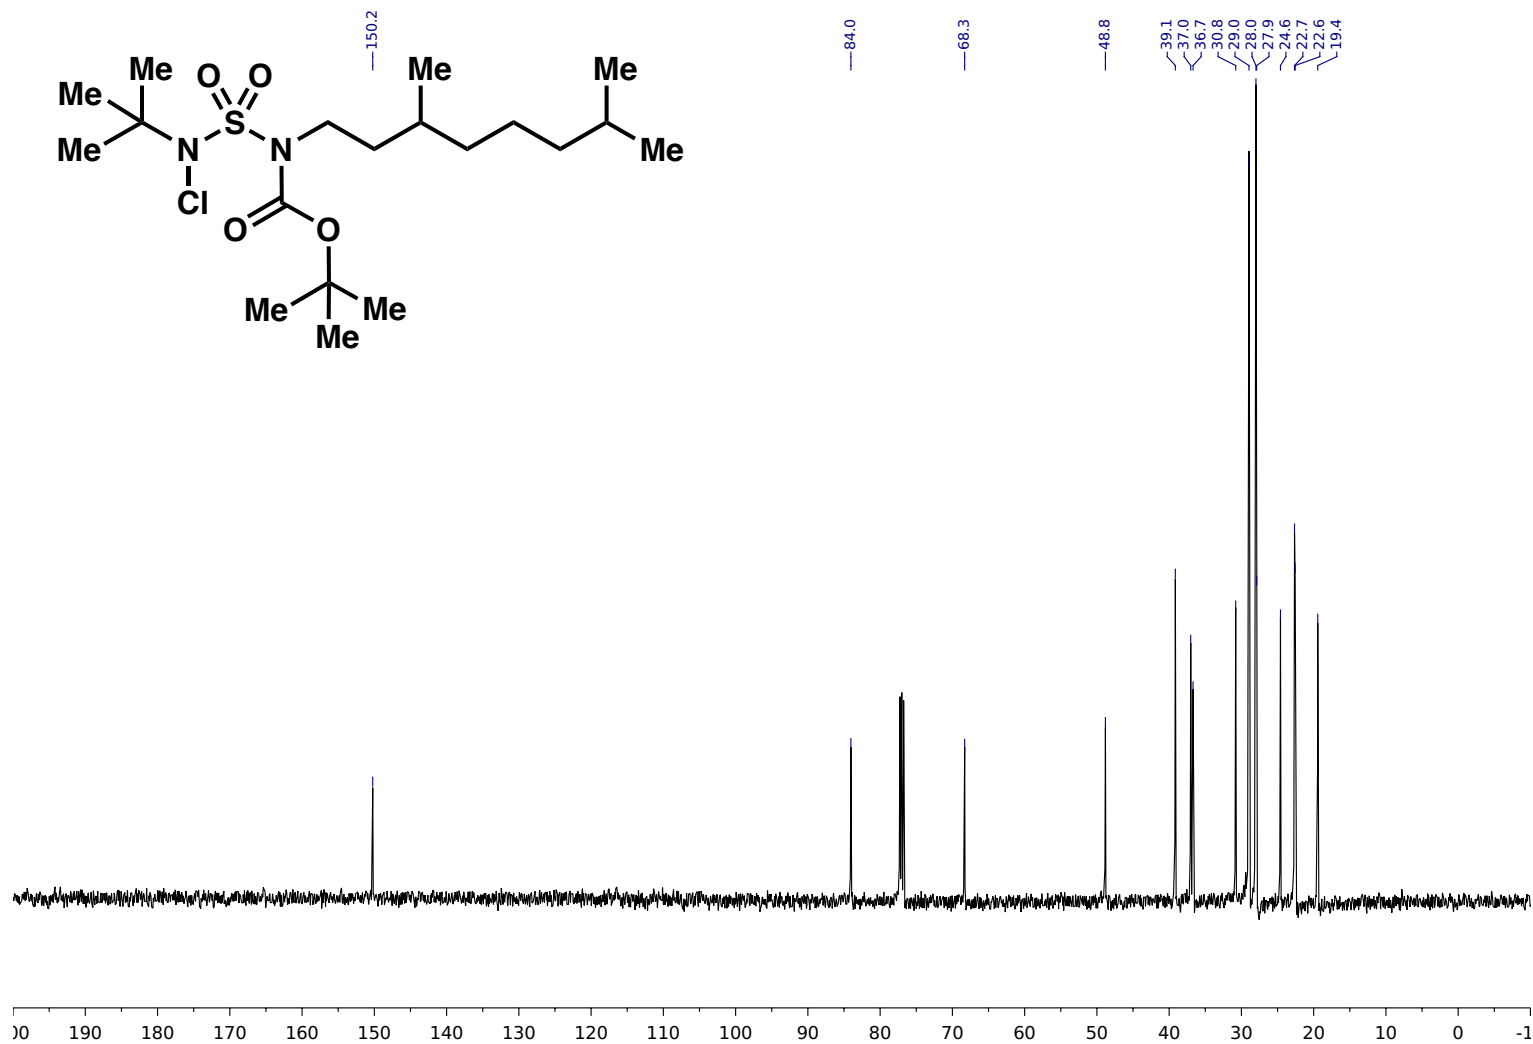

$^{13}\text{C}$  NMR (126 MHz,  $\text{CDCl}_3$ ) for *N*-*tert*-butoxycarbonyl-*N'*-*tert*-butyl-*N'*-chloro-*N*-(3,7-dimethyloct-1-yl)sulfamide (**1h**)



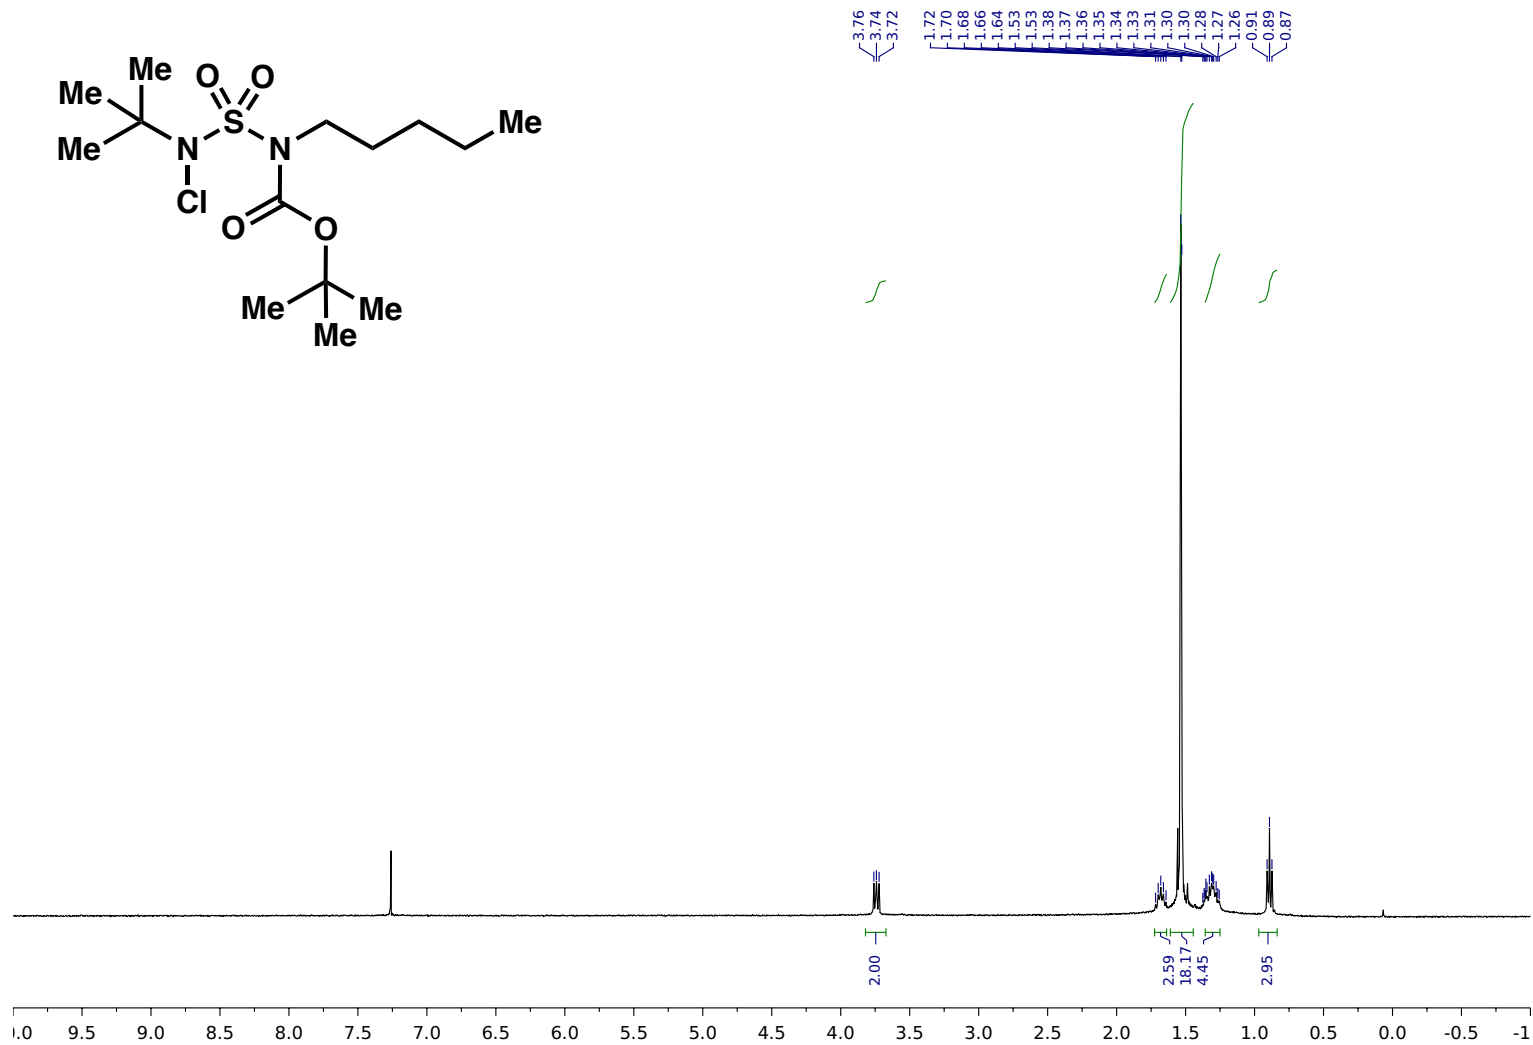

<sup>1</sup>H NMR (400 MHz, CDCl<sub>3</sub>) for *N*-*tert*-butoxycarbonyl-*N'*-*tert*-butyl-*N'*-chloro-*N*-pentylsulfamide (**1i**)

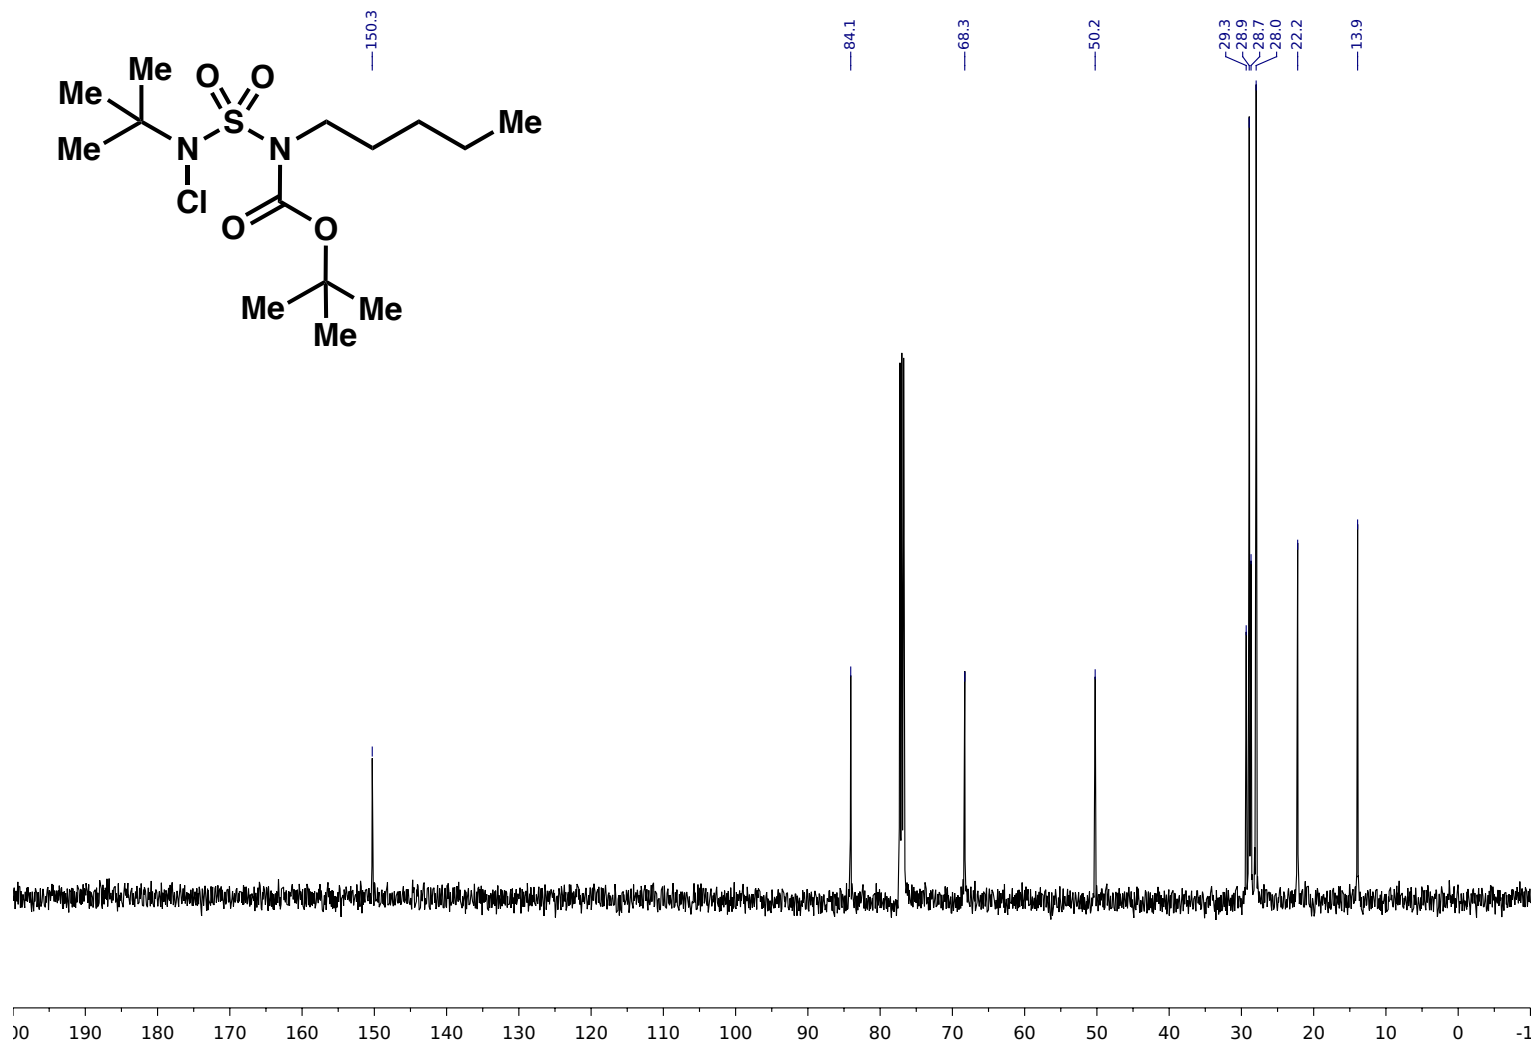

<sup>13</sup>C NMR (126 MHz, CDCl<sub>3</sub>) for *N*-*tert*-butoxycarbonyl-*N'*-*tert*-butyl-*N'*-chloro-*N*-pentylsulfamide (**1i**)

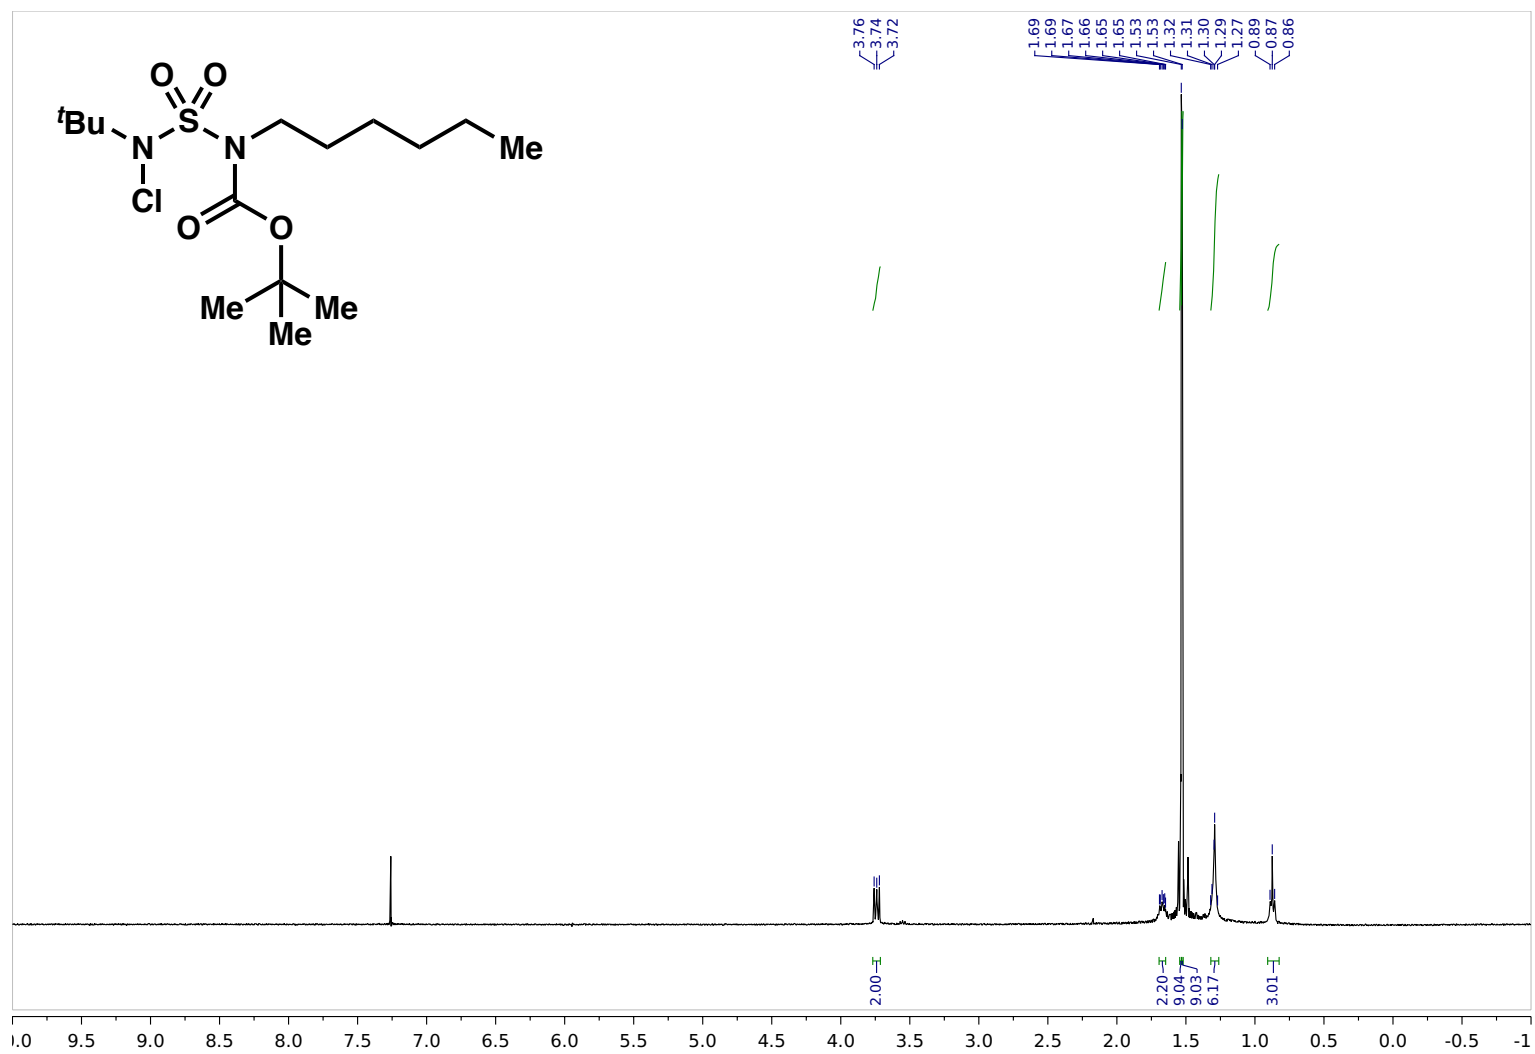

<sup>1</sup>H NMR (400 MHz, CDCl<sub>3</sub>) for *N*-*tert*-butoxycarbonyl-*N'*-*tert*-butyl-*N'*-chloro-*N*-hexylsulfamide (**1j**)

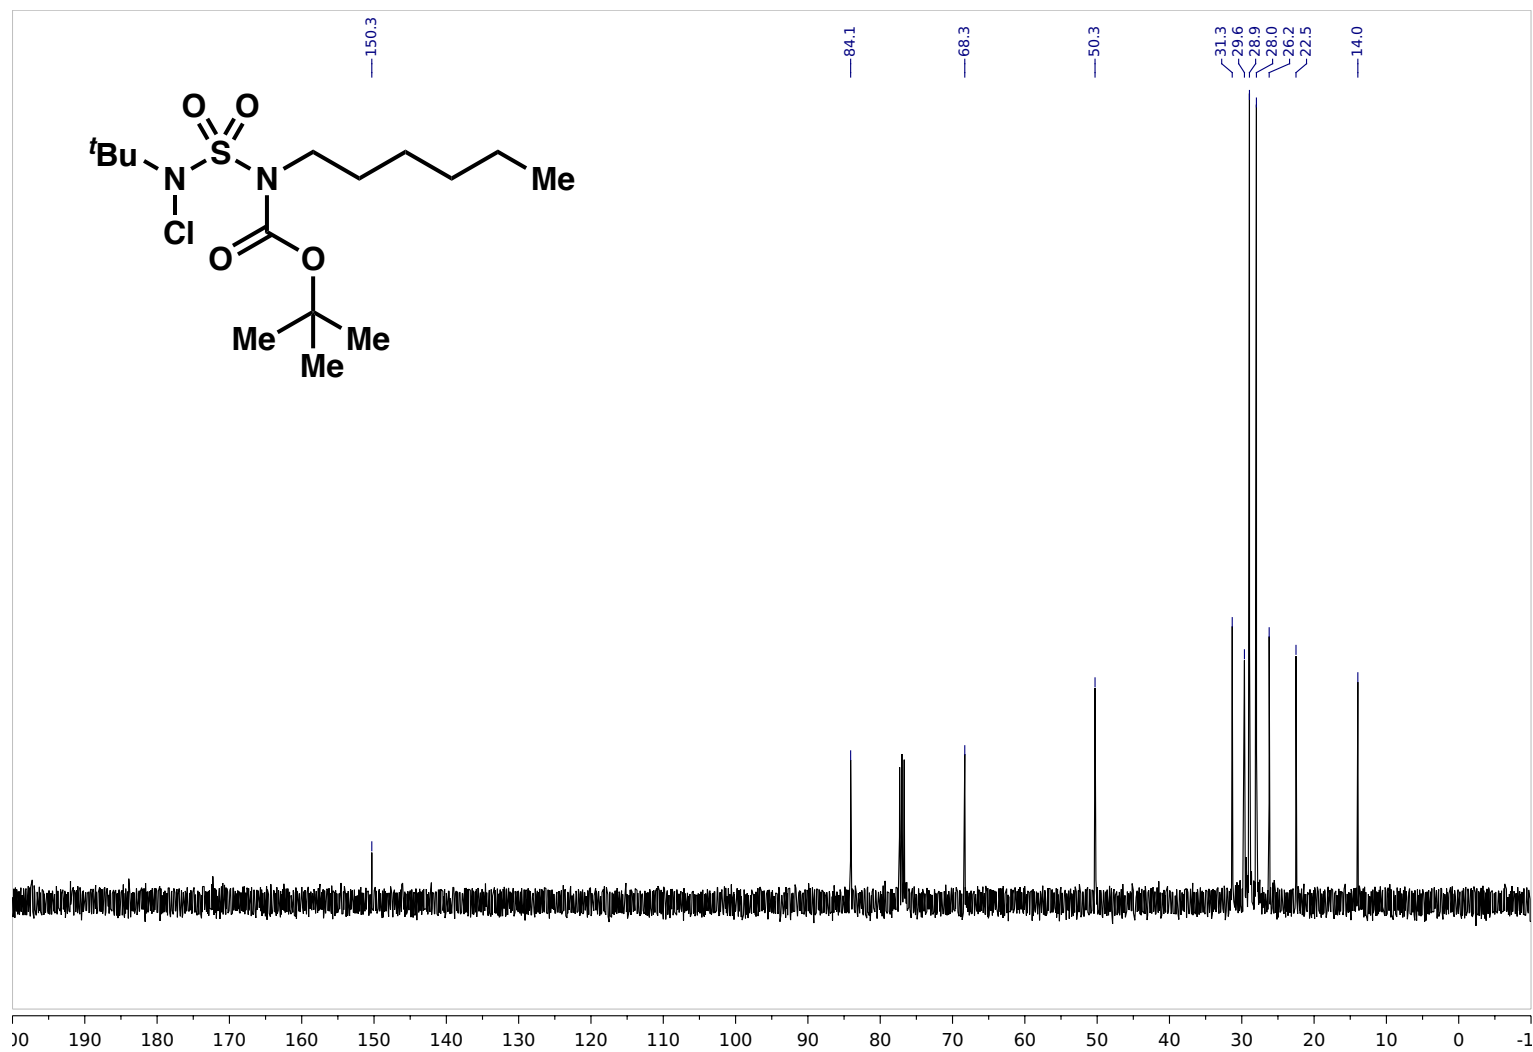

<sup>13</sup>C NMR (101 MHz, CDCl<sub>3</sub>) for *N*-*tert*-butoxycarbonyl-*N'*-*tert*-butyl-*N'*-chloro-*N*-hexylsulfamide (**1j**)

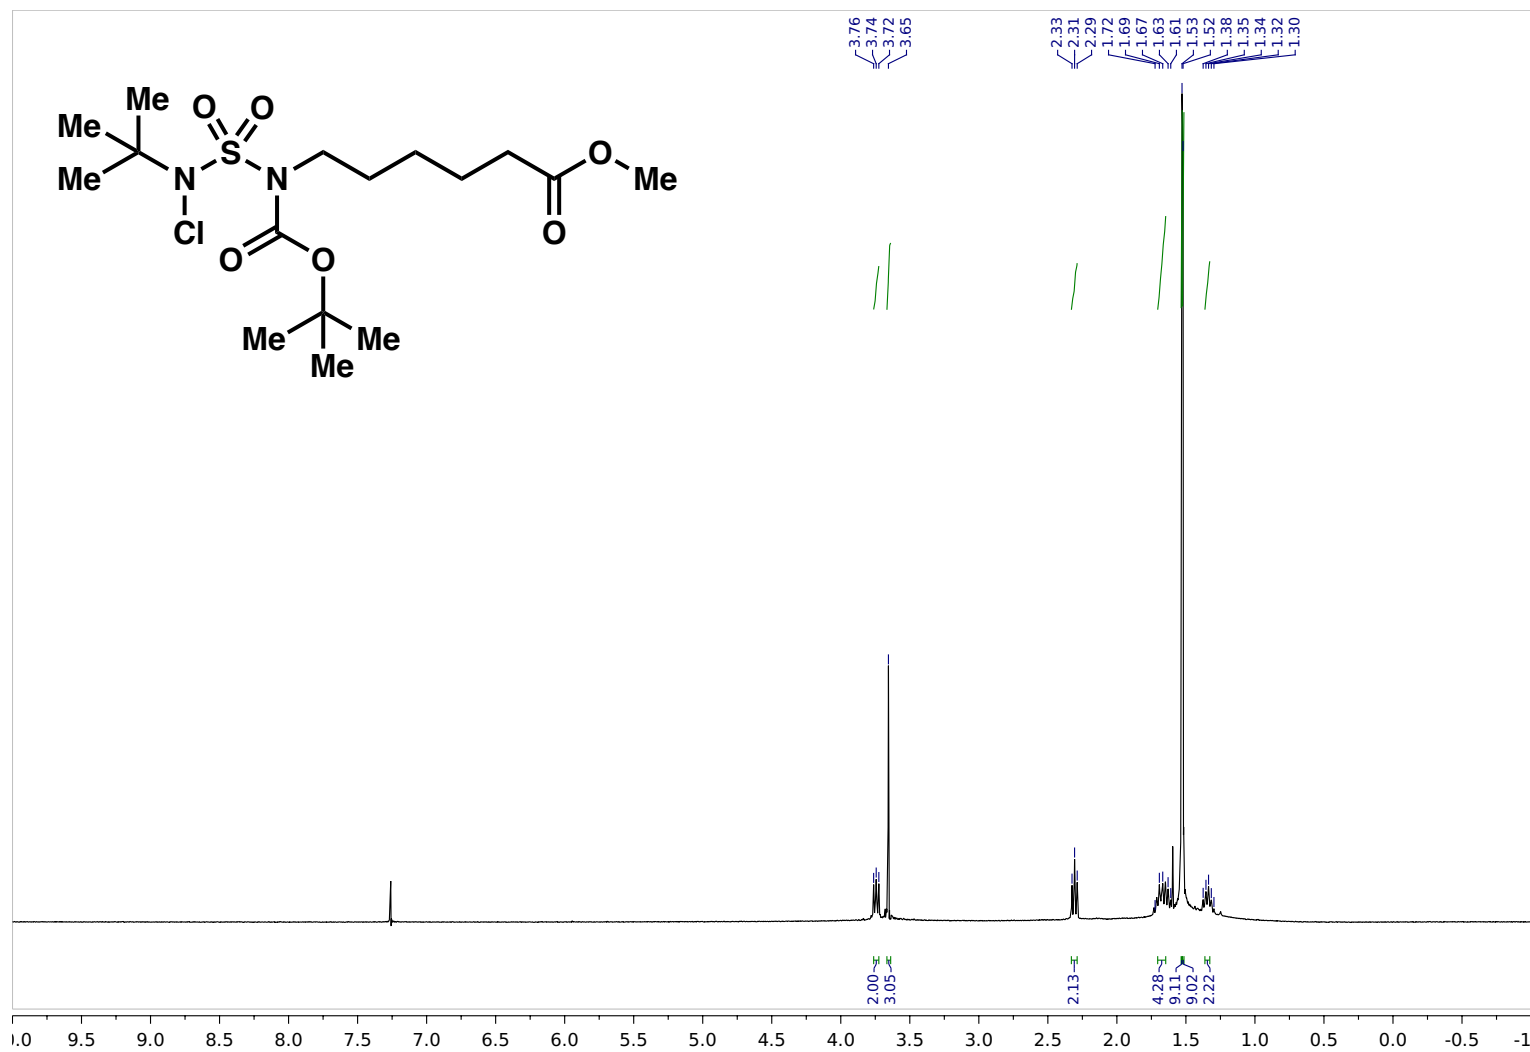

<sup>1</sup>H NMR (400 MHz, CDCl<sub>3</sub>) for *N*-*tert*-butyloxycarbonyl-*N'*-*tert*-butyl-*N'*-chloro-*N*-(methyl hexano-6-yl)sulfamide (**1k**)

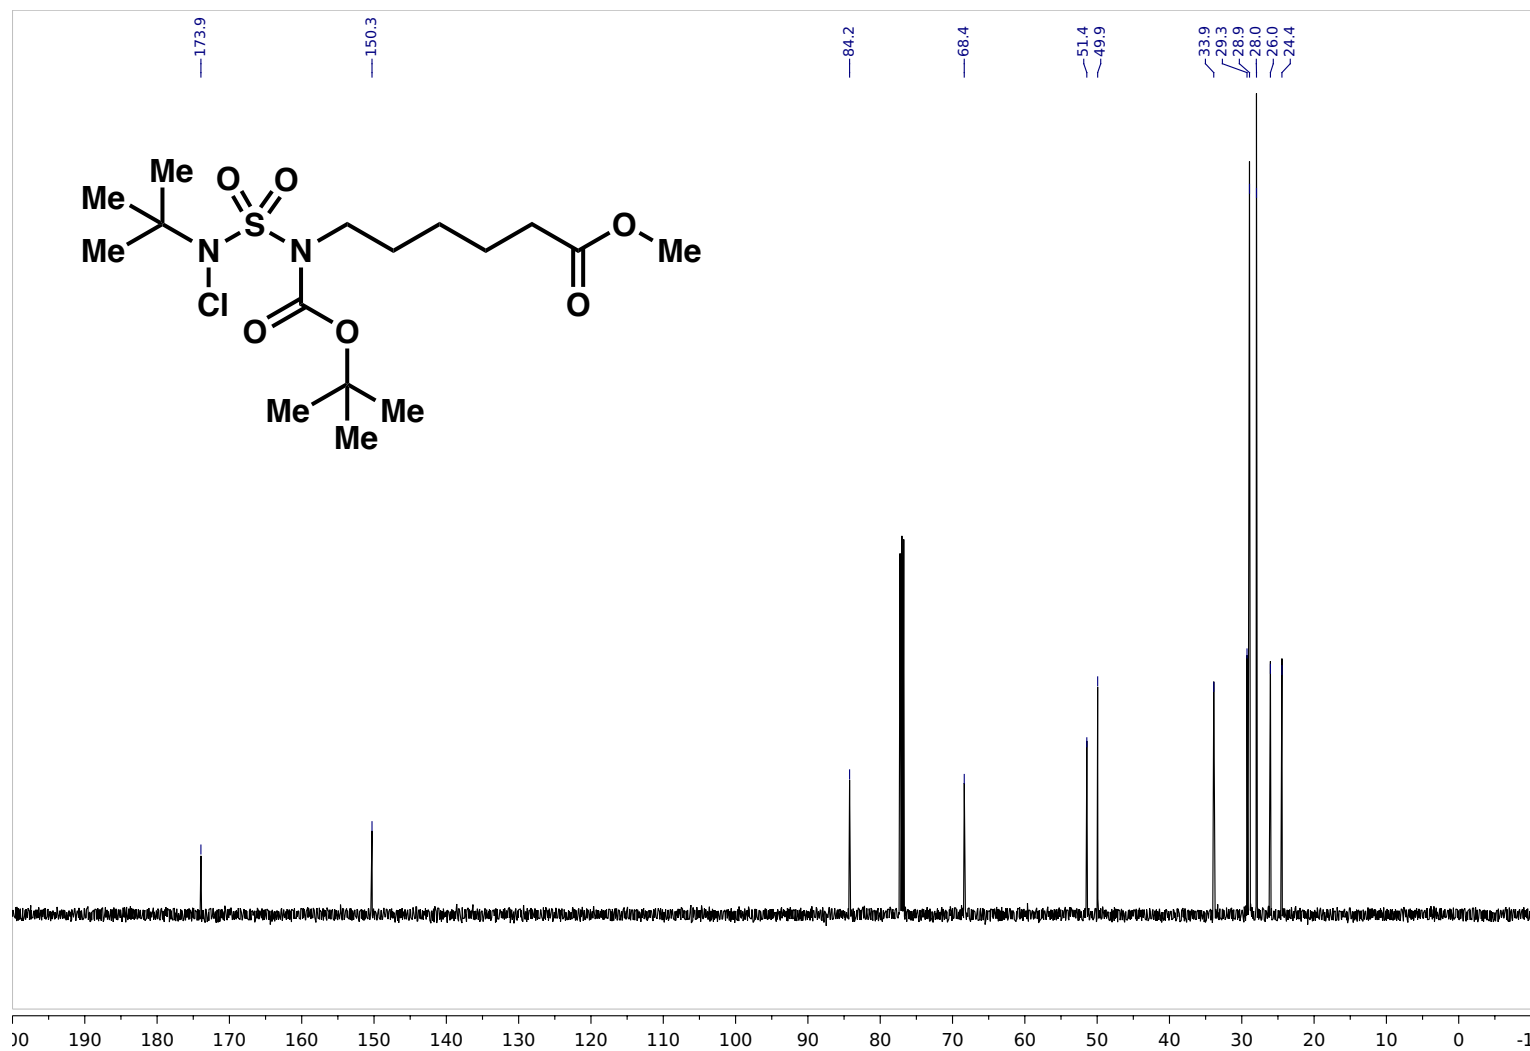

<sup>13</sup>C NMR (126 MHz, CDCl<sub>3</sub>) for *N*-*tert*-butyloxycarbonyl-*N'*-*tert*-butyl-*N'*-chloro-*N*-(methyl hexano-6-yl)sulfamide (**1k**)

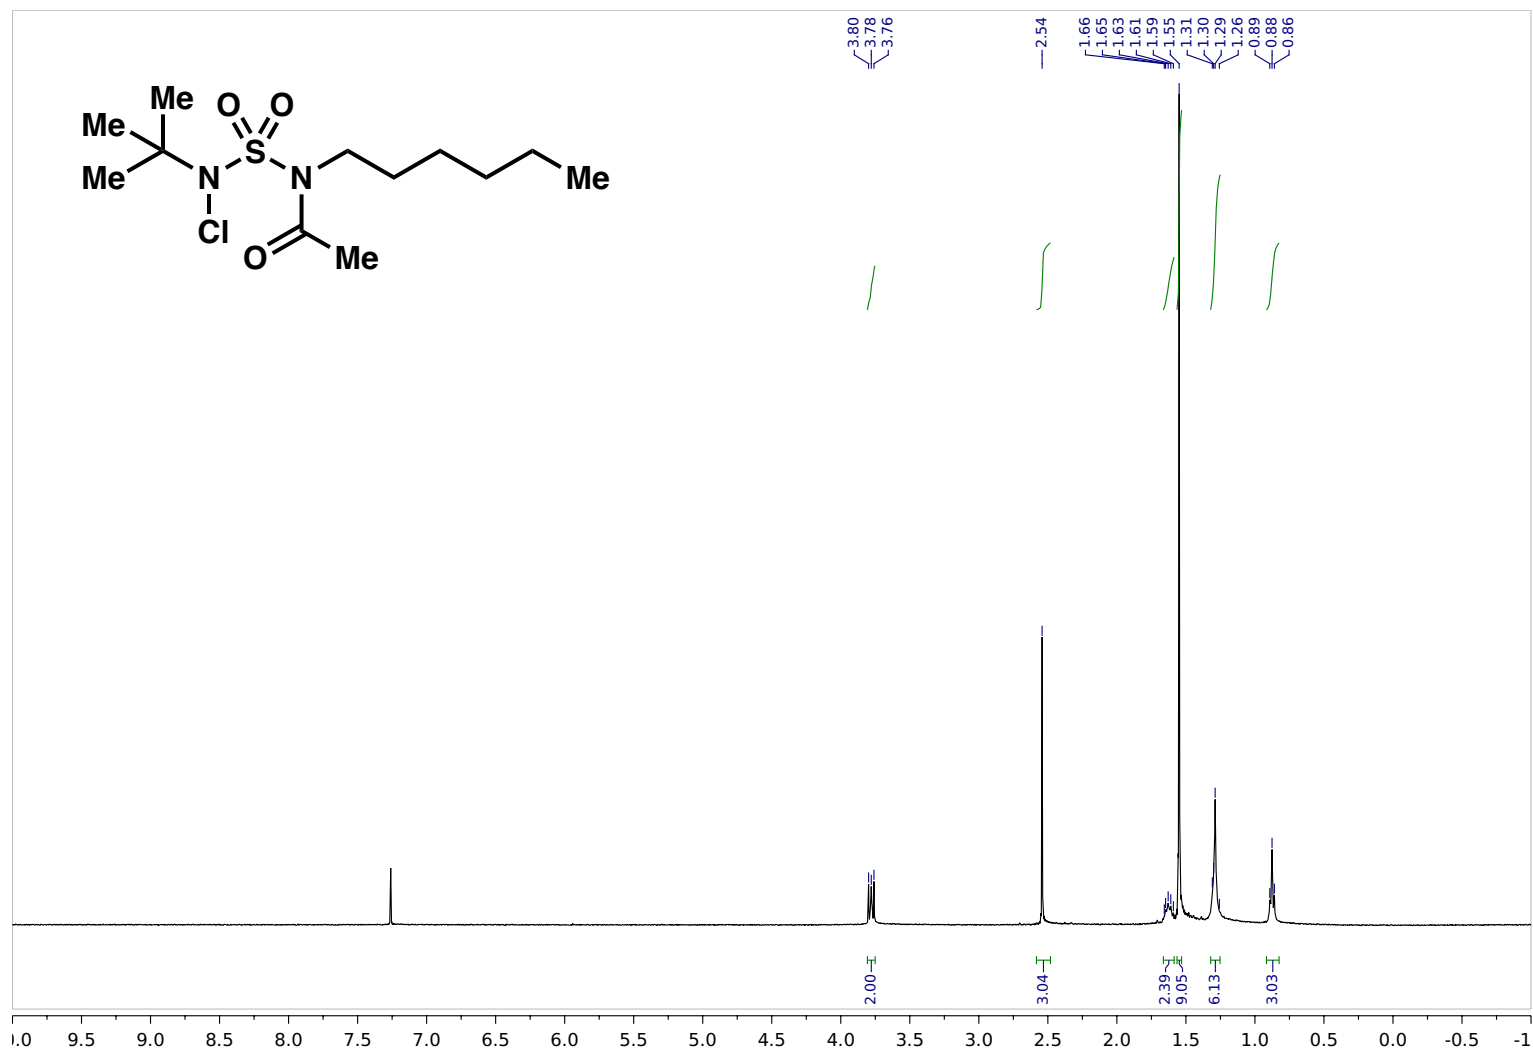

<sup>1</sup>H NMR (400 MHz, CDCl<sub>3</sub>) for *N*-acetyl-*N'*-*tert*-butyl-*N'*-chloro-*N*-hexylsulfamide (11)

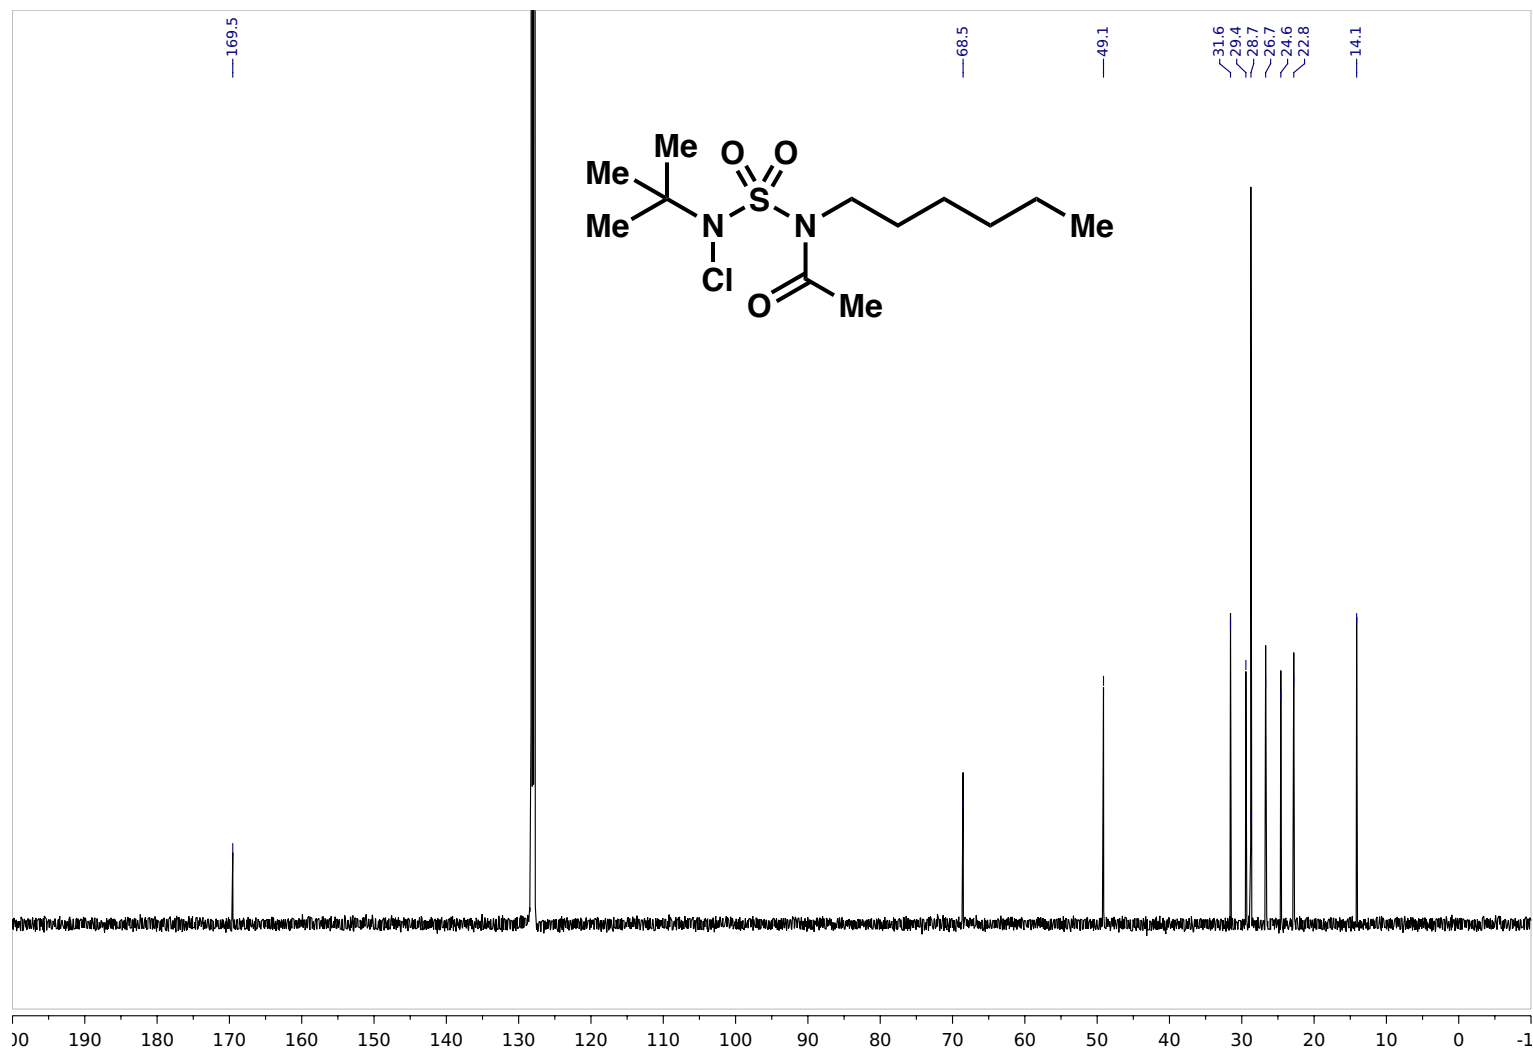

$^{13}\text{C}$  NMR (126 MHz,  $\text{C}_6\text{D}_6$ ) for *N*-acetyl-*N'*-*tert*-butyl-*N'*-chloro-*N*-hexylsulfamide (**11**)



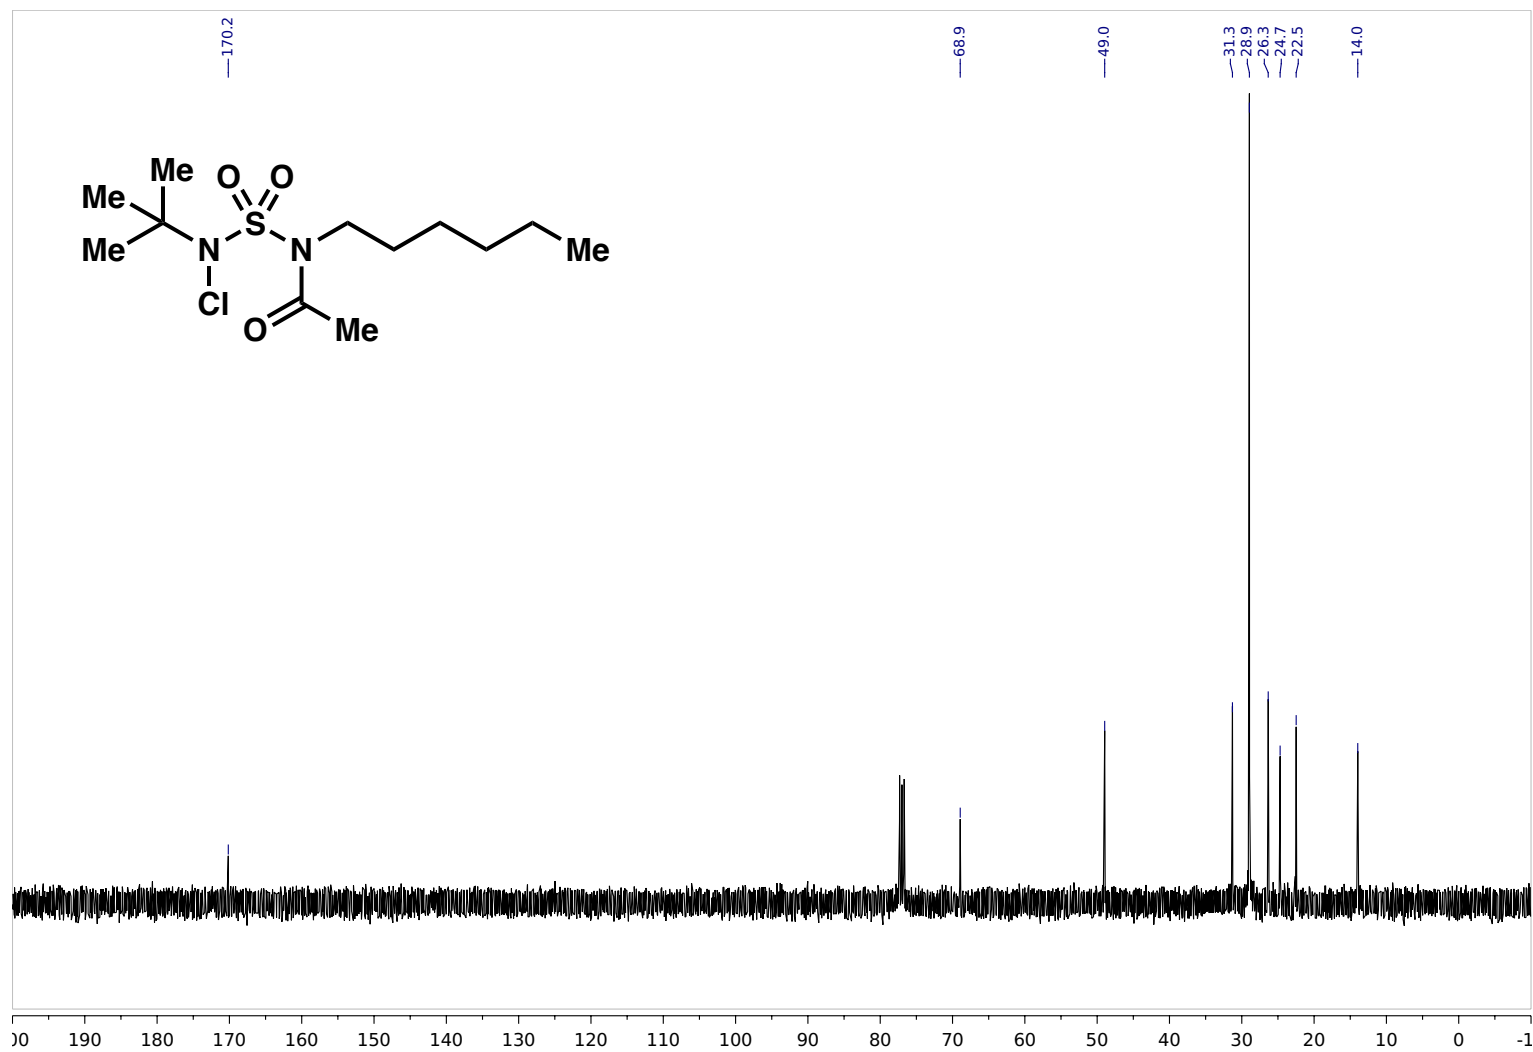

<sup>13</sup>C NMR (101 MHz, CDCl<sub>3</sub>) for *N*-acetyl-*N'*-*tert*-butyl-*N'*-chloro-*N*-hexylsulfamide (II)

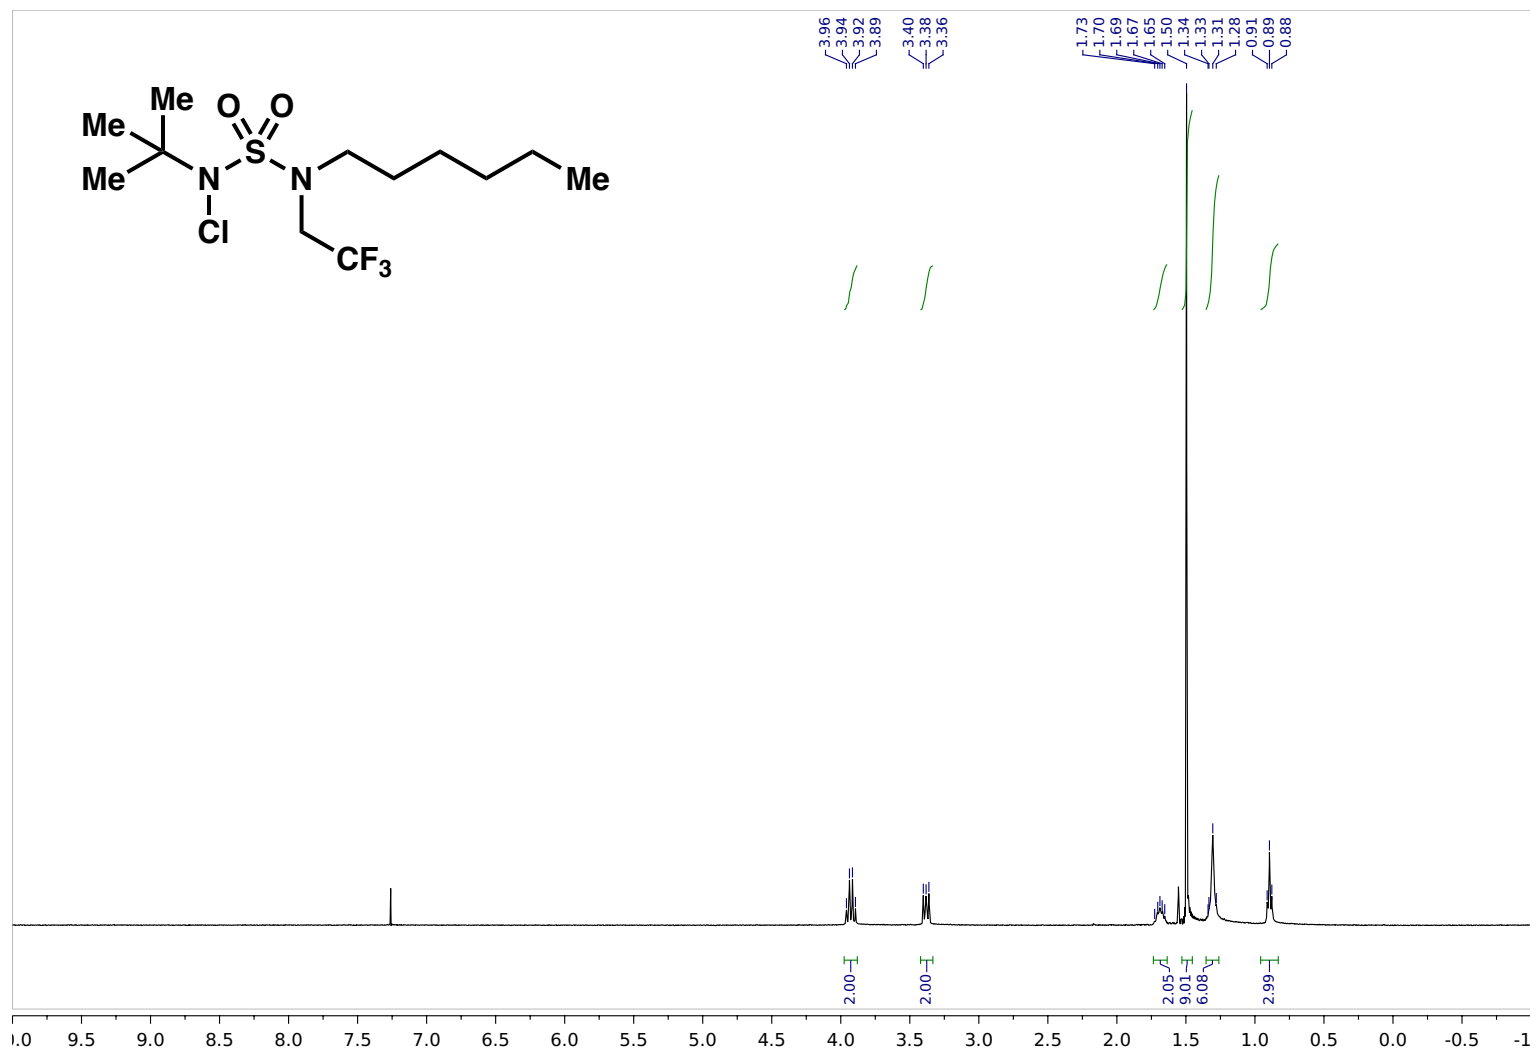

<sup>1</sup>H NMR (400 MHz, CDCl<sub>3</sub>) for *N*-*tert*-butyl-*N*-chloro-*N'*-hexyl-*N''*-(2,2,2-trifluoroethyl)sulfamide (**1m**)

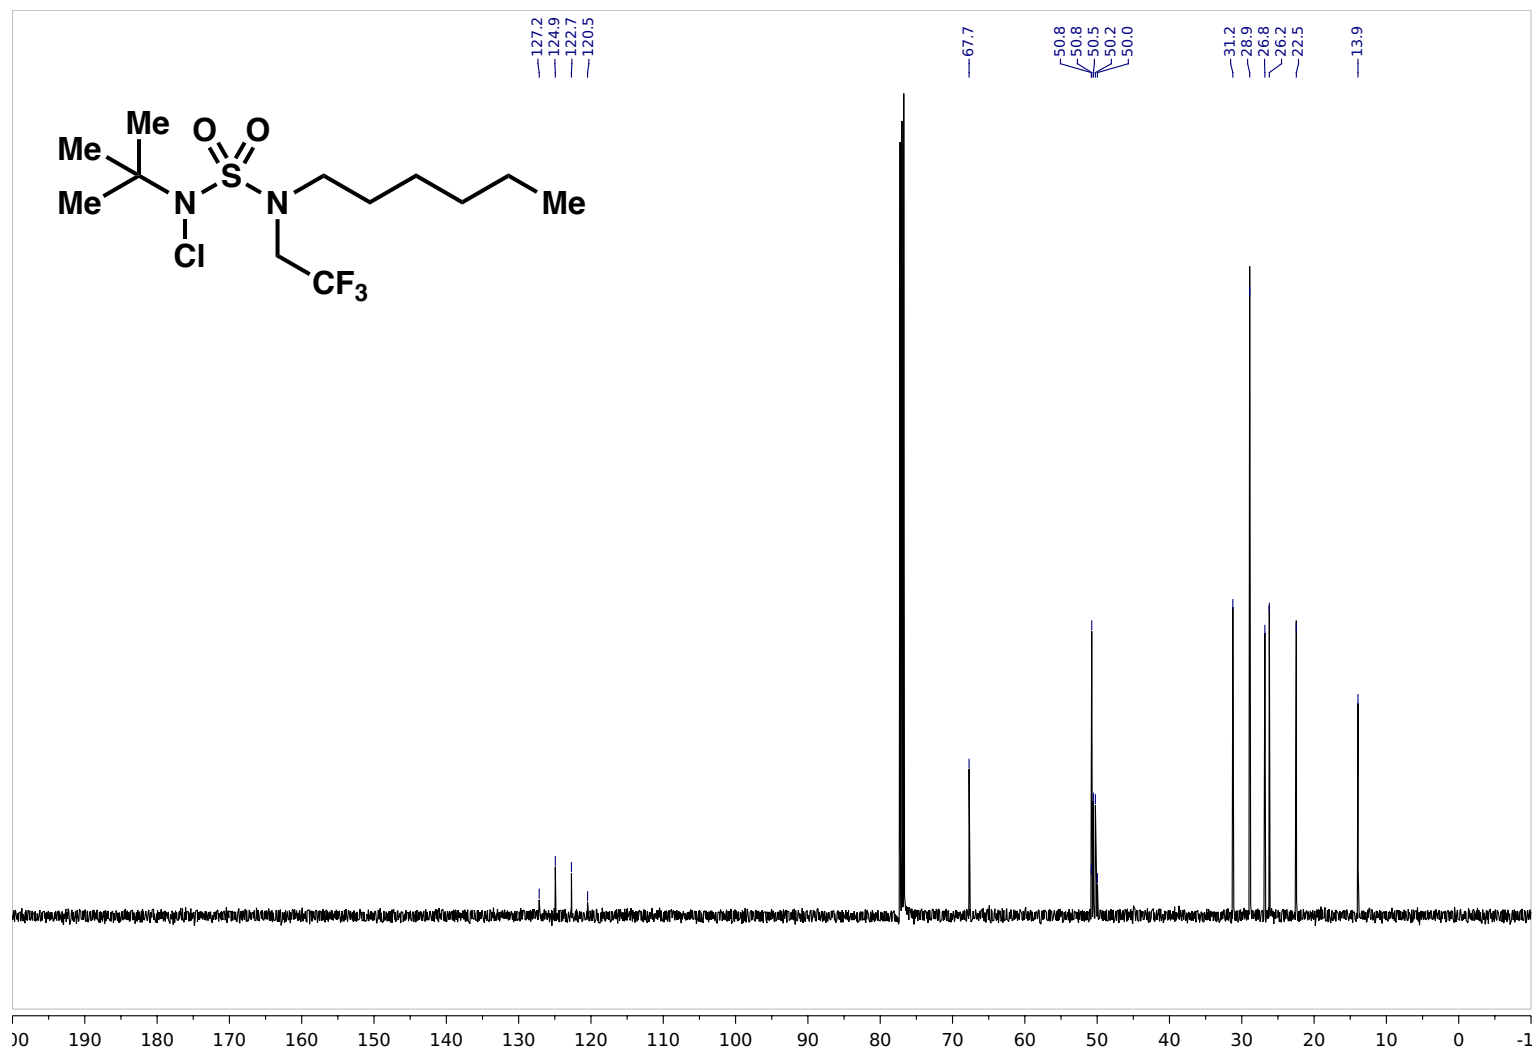

<sup>13</sup>C NMR (126 MHz, CDCl<sub>3</sub>) for *N*-*tert*-butyl-*N*-chloro-*N'*-hexyl-*N'*-(2,2,2-trifluoroethyl)sulfamide (**1m**)

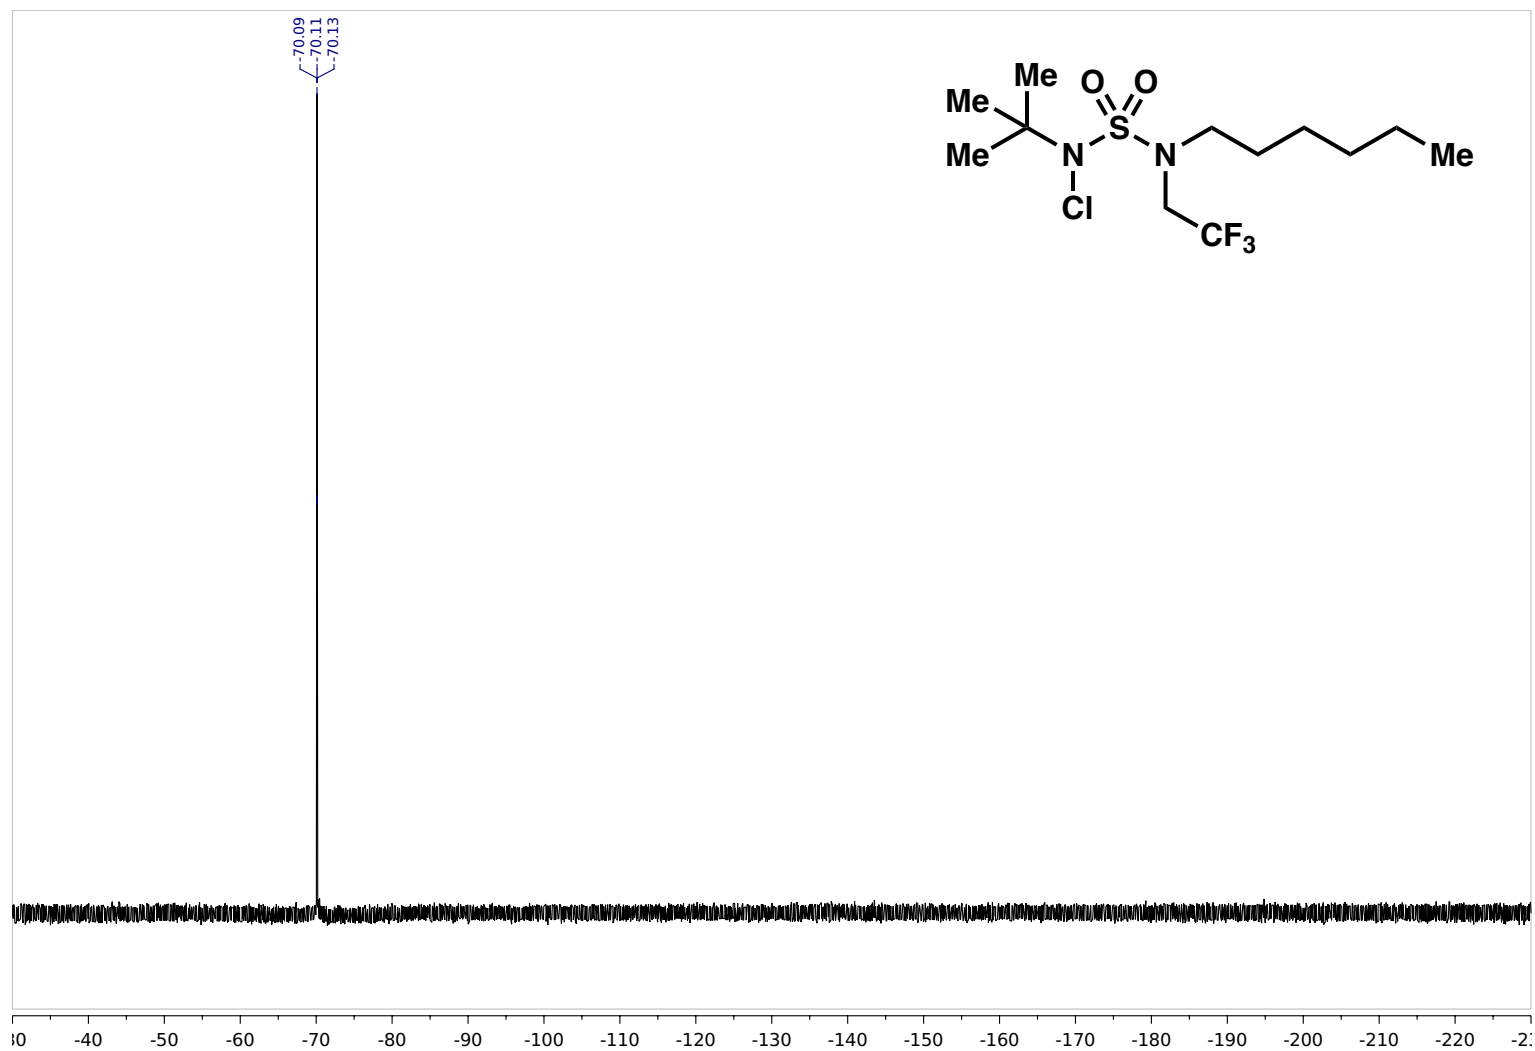

$^{19}\text{F}$  NMR (376 MHz,  $\text{CDCl}_3$ ) for *N*-*tert*-butyl-*N*-chloro-*N'*-hexyl-*N'*-(2,2,2-trifluoroethyl)sulfamide (**1m**)

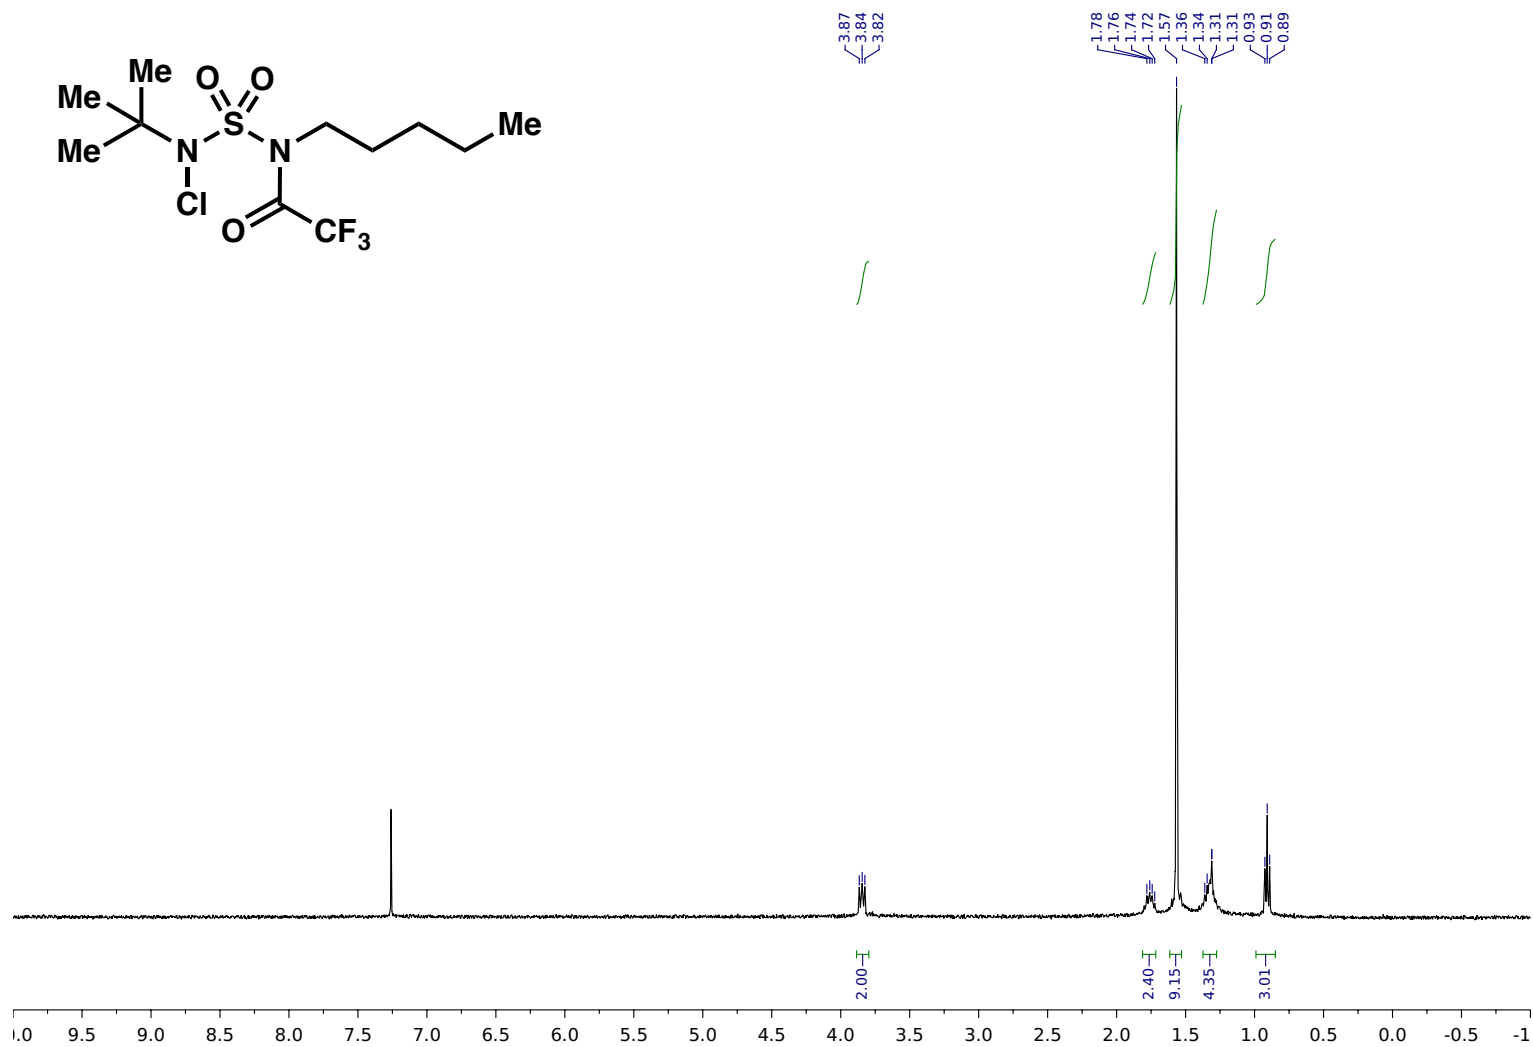

<sup>1</sup>H NMR (400 MHz, CDCl<sub>3</sub>) for *N'*-*tert*-butyl-*N'*-chloro-*N*-trifluoroacetyl-*N*-pentylsulfamide (**1n**)

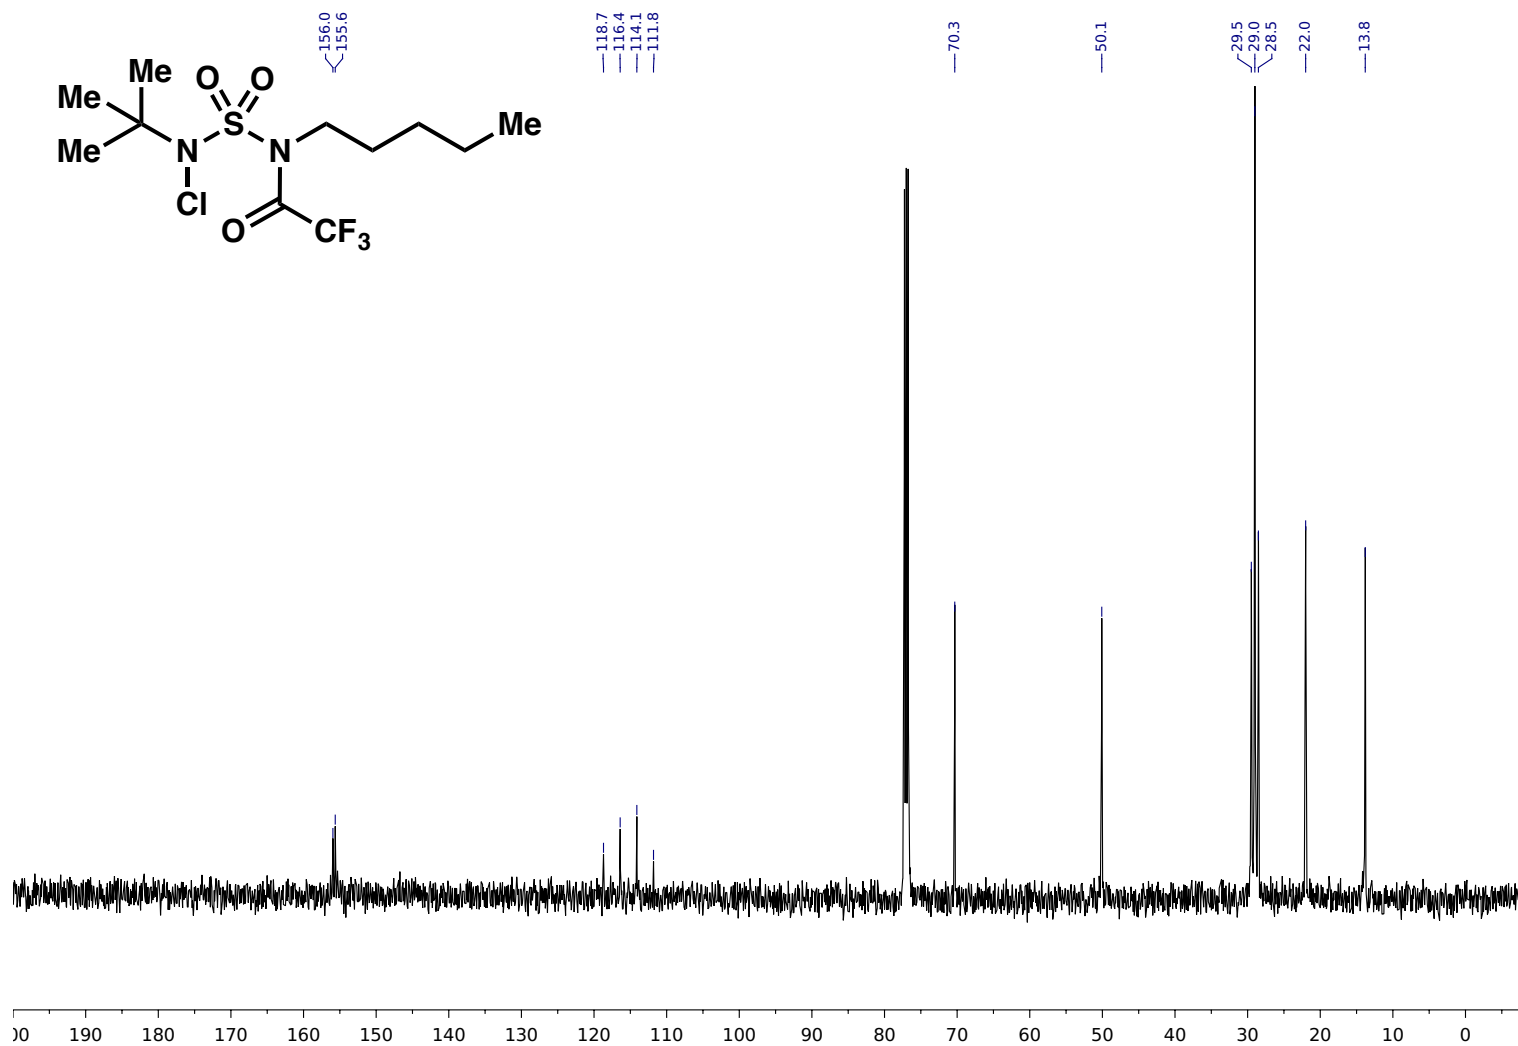

<sup>13</sup>C NMR (400 MHz, CDCl<sub>3</sub>) for *N'*-*tert*-butyl-*N'*-chloro-*N*-trifluoroacetyl-*N*-pentylsulfamide (**1n**)

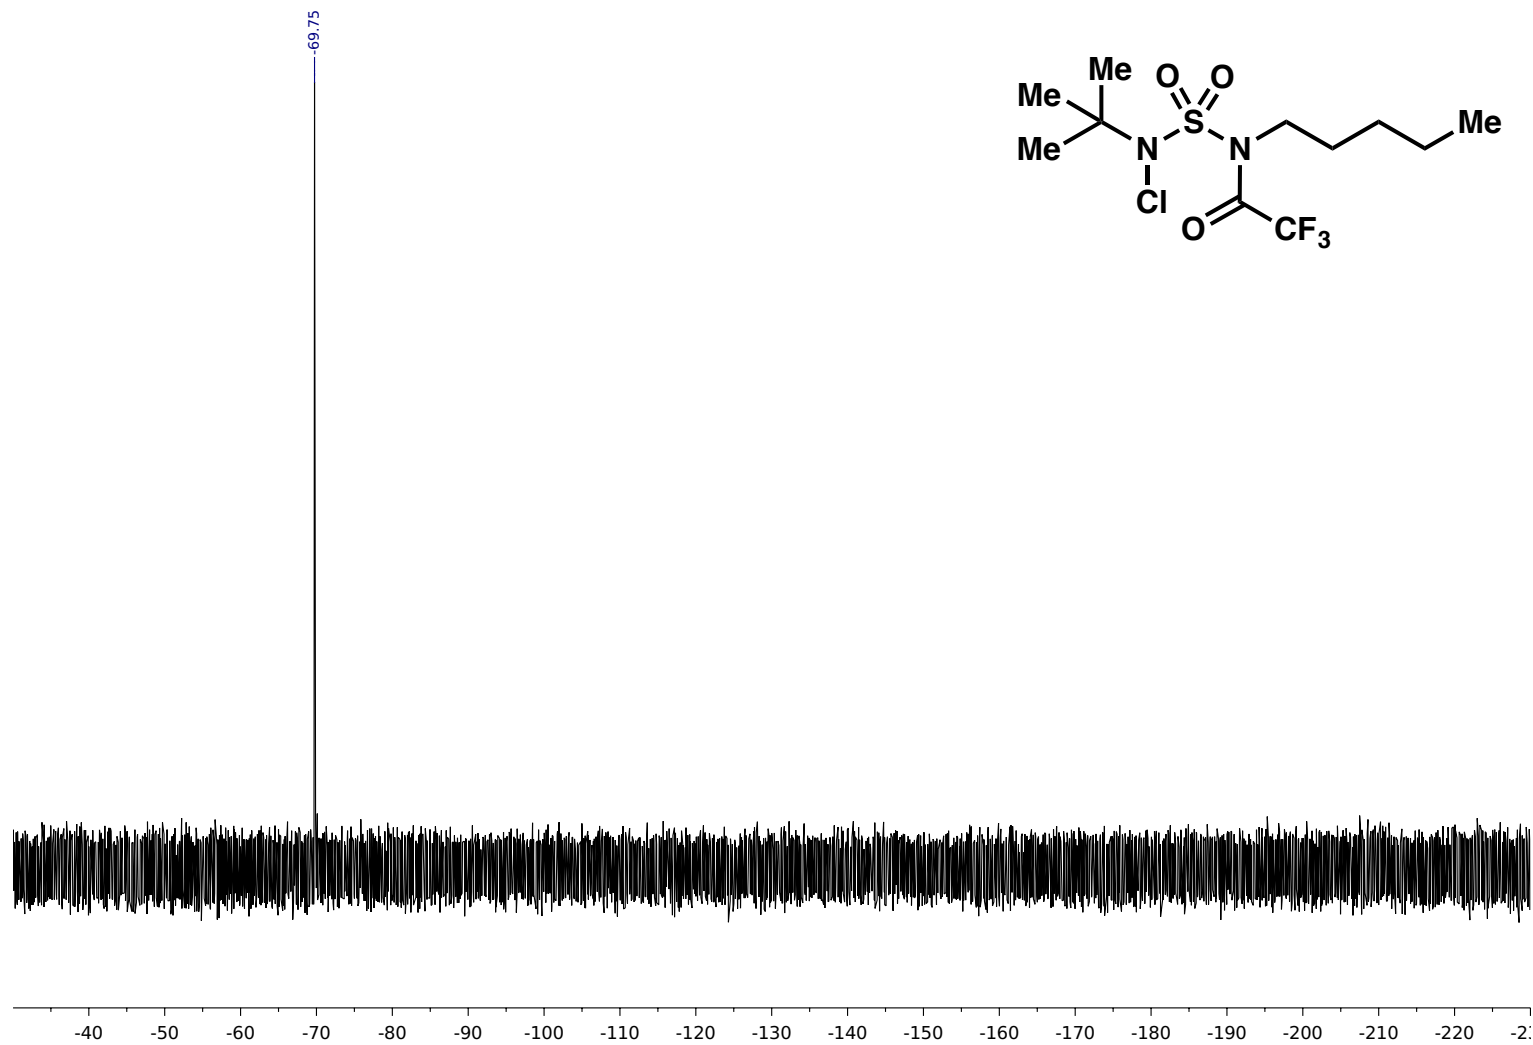

$^{19}\text{F}$  NMR (376 MHz,  $\text{CDCl}_3$ ) for *N'*-*tert*-butyl-*N'*-chloro-*N*-trifluoroacetyl-*N*-pentylsulfamide (**1n**)

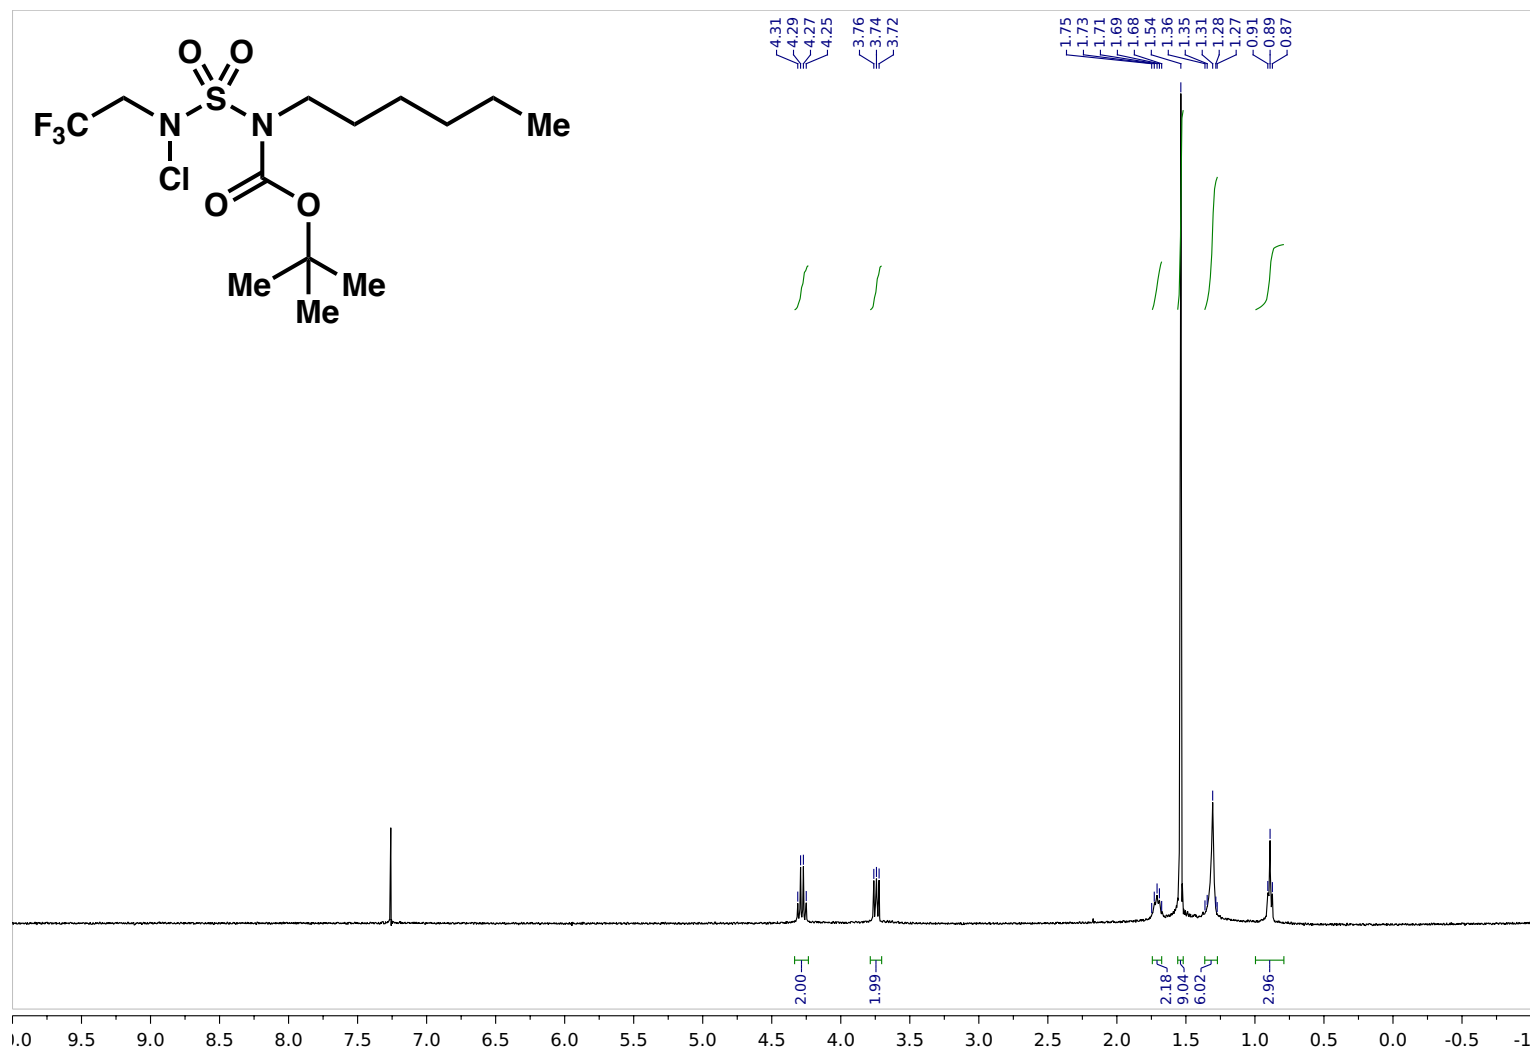

<sup>1</sup>H NMR (400 MHz, CDCl<sub>3</sub>) for *N-tert-butoxycarbonyl-N-hexyl-N'-chloro-N'-(2,2,2-trifluoroethyl)sulfamide (1o)*



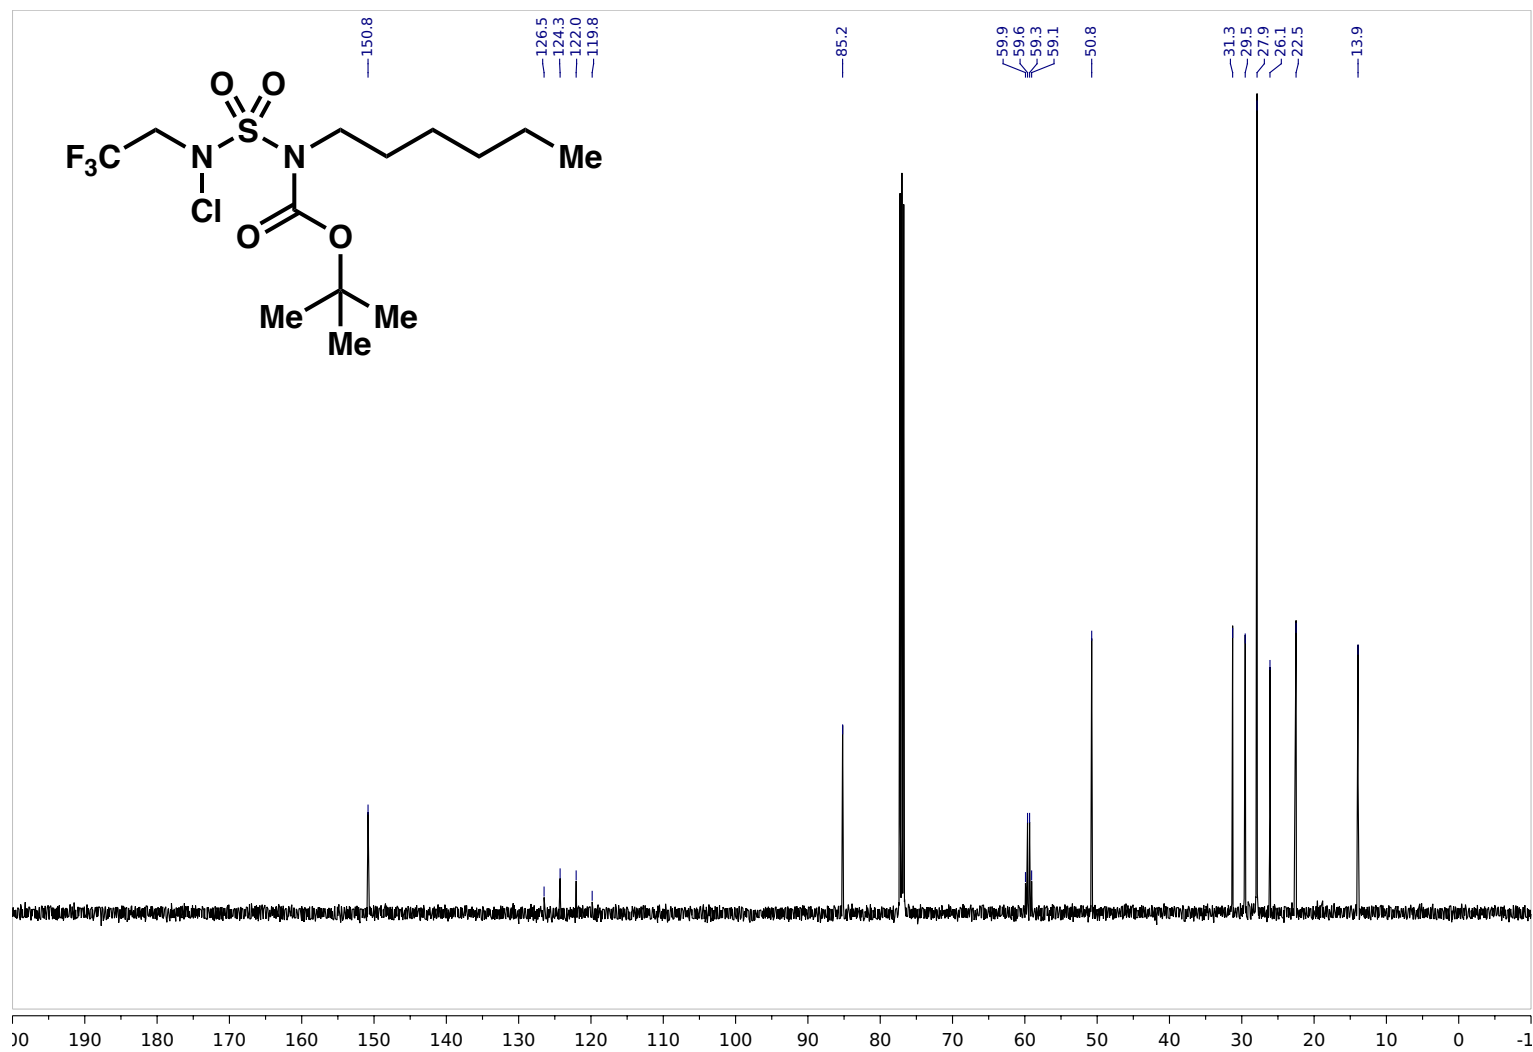

<sup>13</sup>C NMR (126 MHz, CDCl<sub>3</sub>) for *N*-*tert*-butoxycarbonyl-*N*-hexyl-*N'*-chloro-*N'*-(2,2,2-trifluoroethyl)sulfamide (**10**)

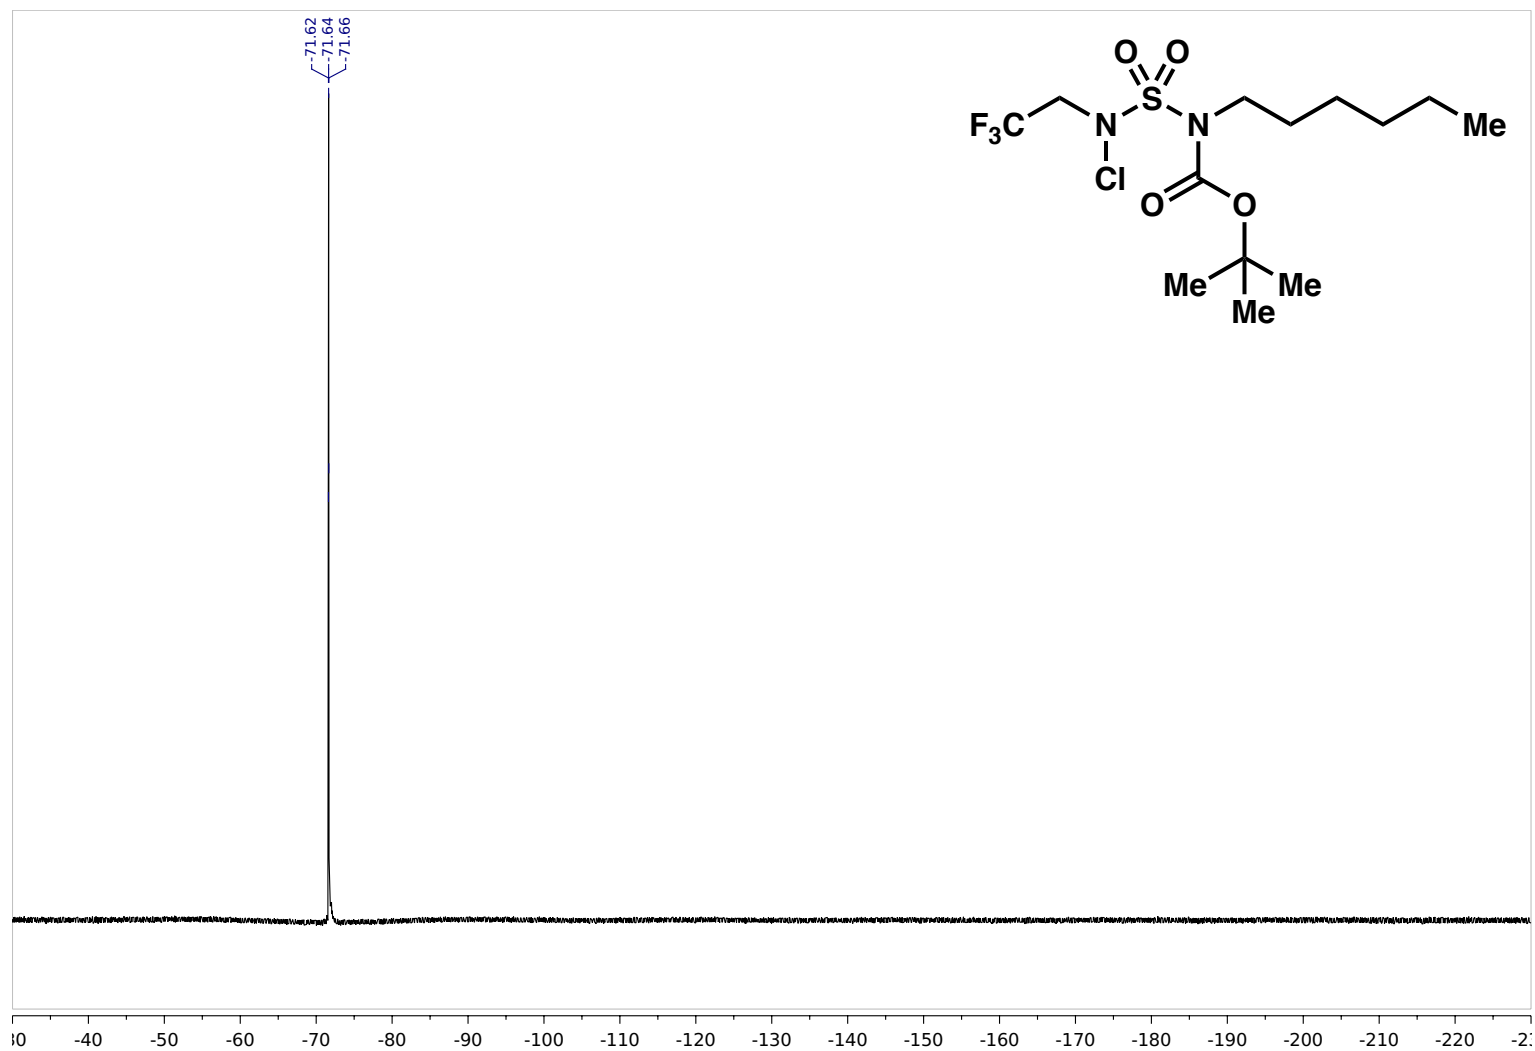

$^{19}\text{F}$  NMR (126 MHz,  $\text{CDCl}_3$ ) for *N*-*tert*-butoxycarbonyl-*N*-hexyl-*N'*-chloro-*N'*-(2,2,2-trifluoroethyl)sulfamide (**10**)

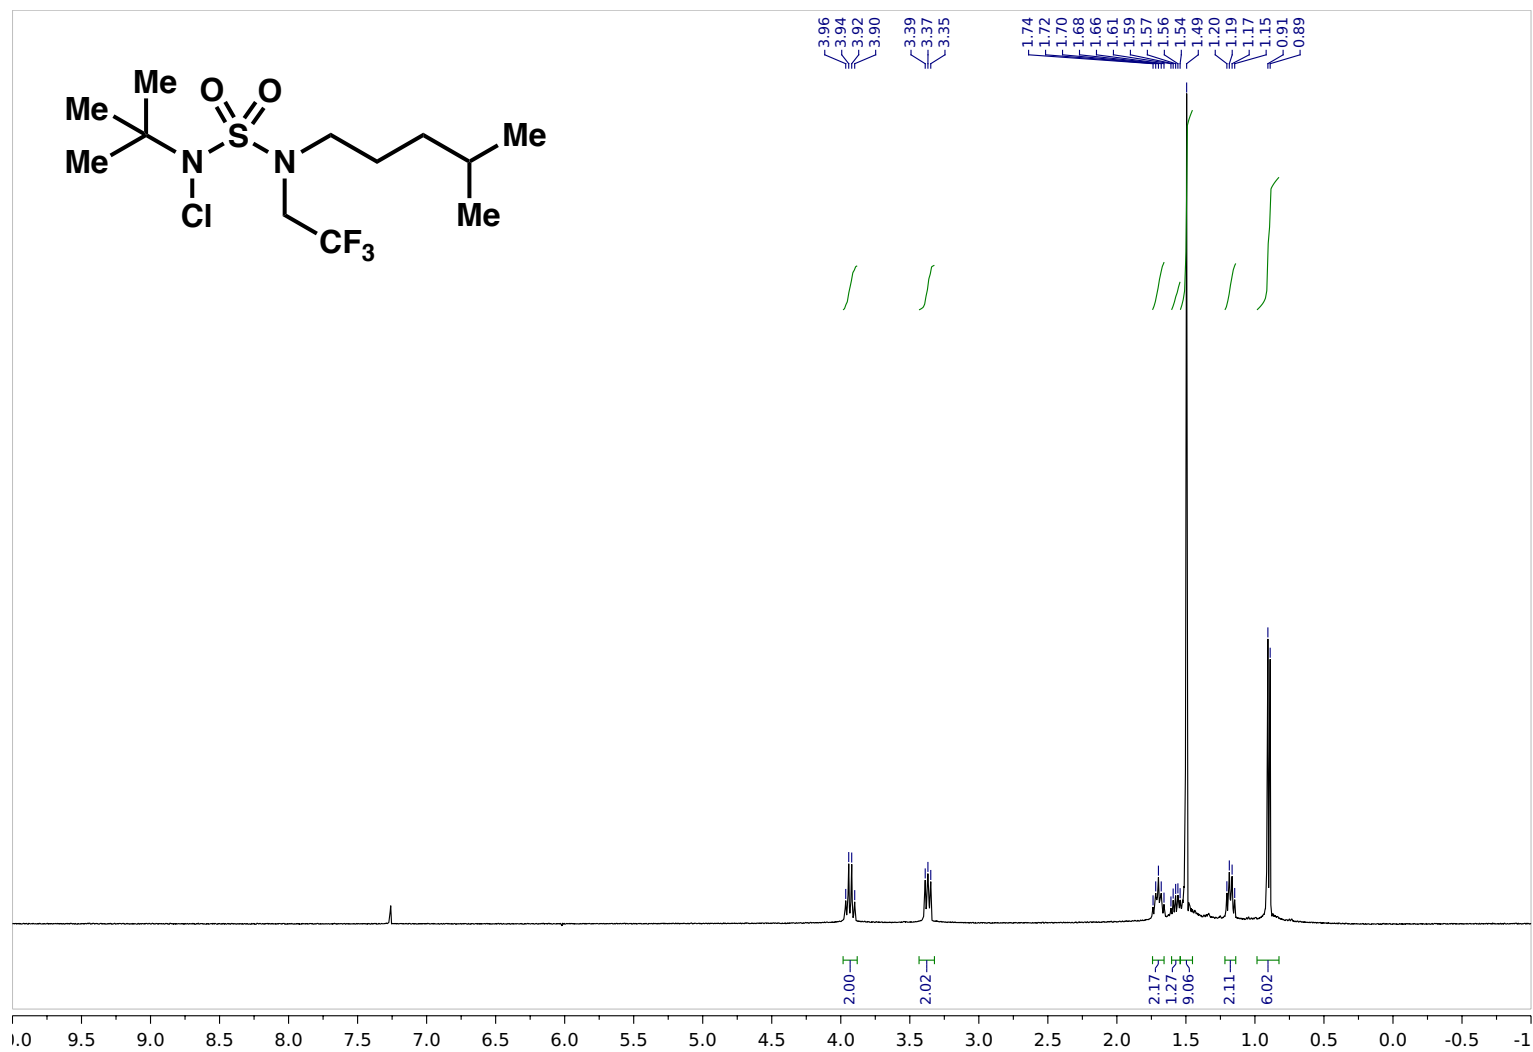

<sup>1</sup>H NMR (400 MHz, CDCl<sub>3</sub>) for *N-tert-butyl-N-chloro-N'-4-methylpentyl-N''-(2,2,2-trifluoroethyl)sulfamide (1p)*

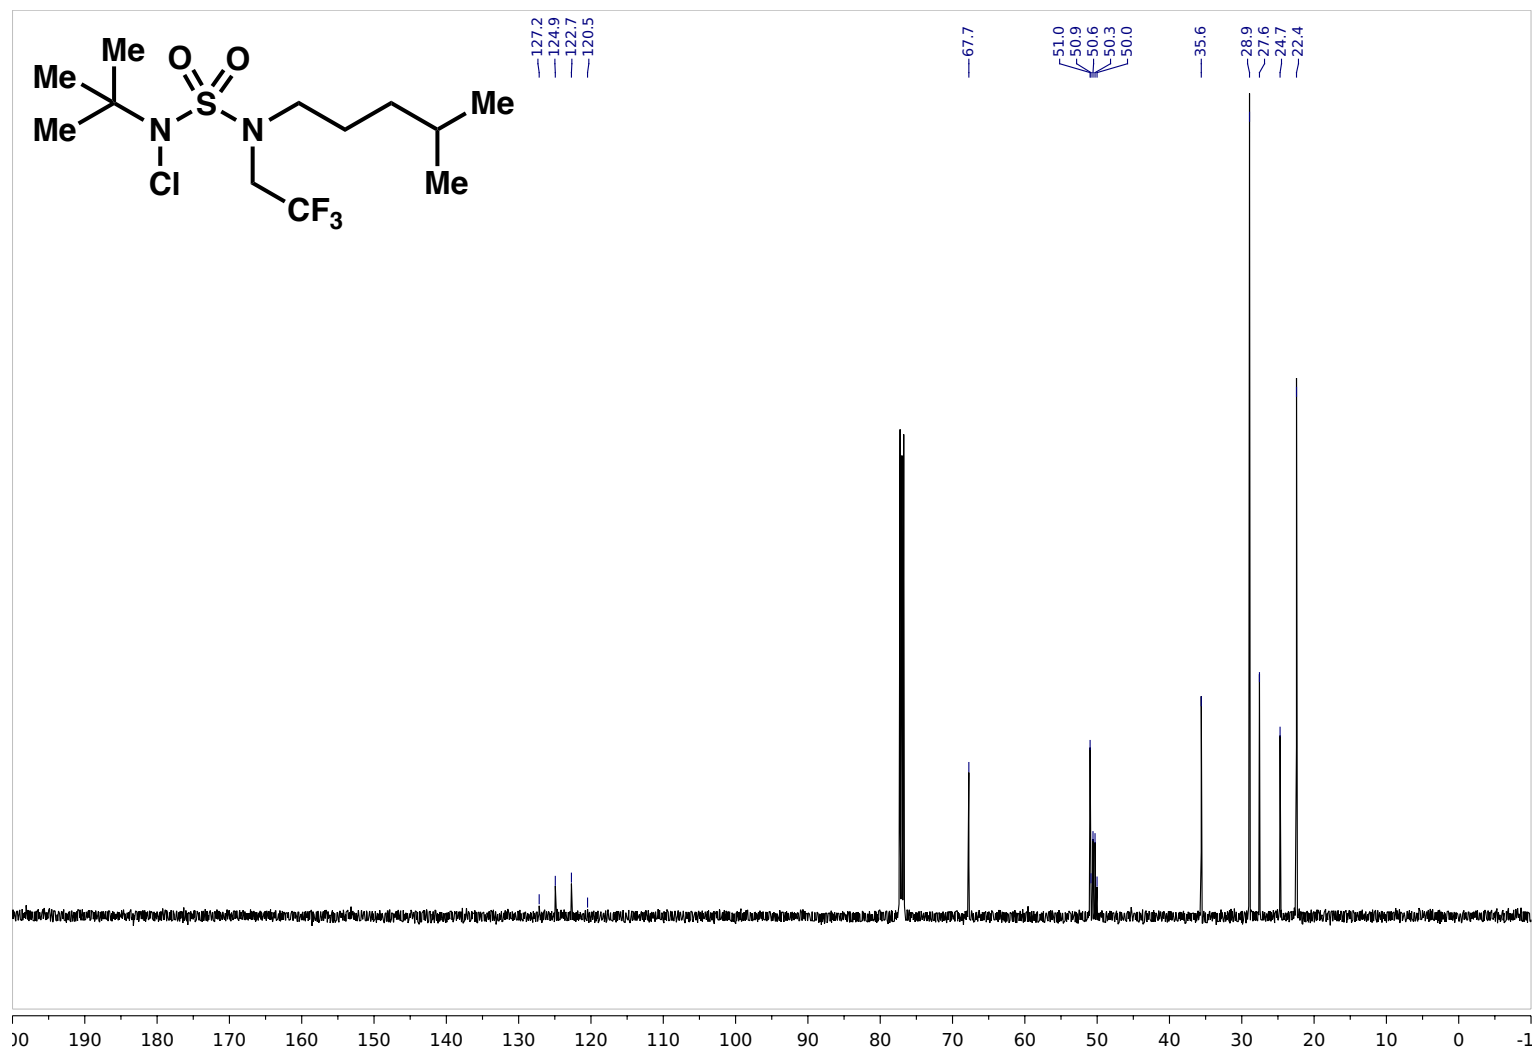

<sup>13</sup>C NMR (126 MHz, CDCl<sub>3</sub>) for *N*-*tert*-butyl-*N*-chloro-*N'*-4-methylpentyl-*N'*-(2,2,2-trifluoroethyl)sulfamide (**1p**)

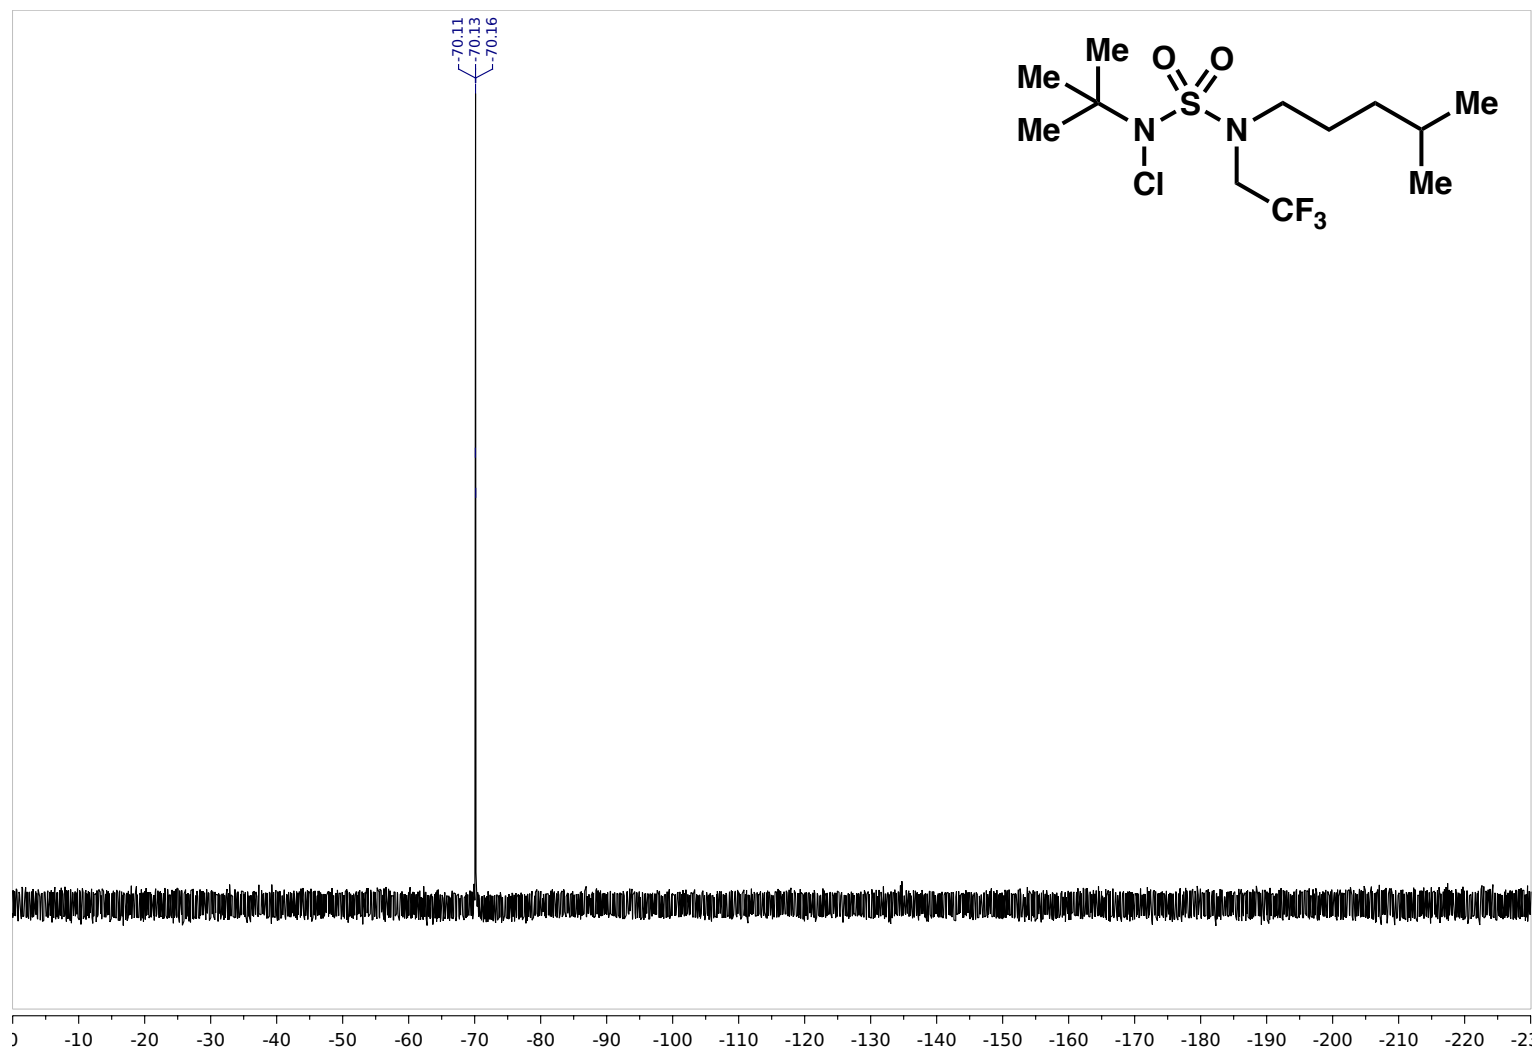

$^{19}\text{F}$  NMR (376 MHz,  $\text{CDCl}_3$ ) for *N*-*tert*-butyl-*N*-chloro-*N'*-4-methylpentyl-*N'*-(2,2,2-trifluoroethyl)sulfamide (**1p**)

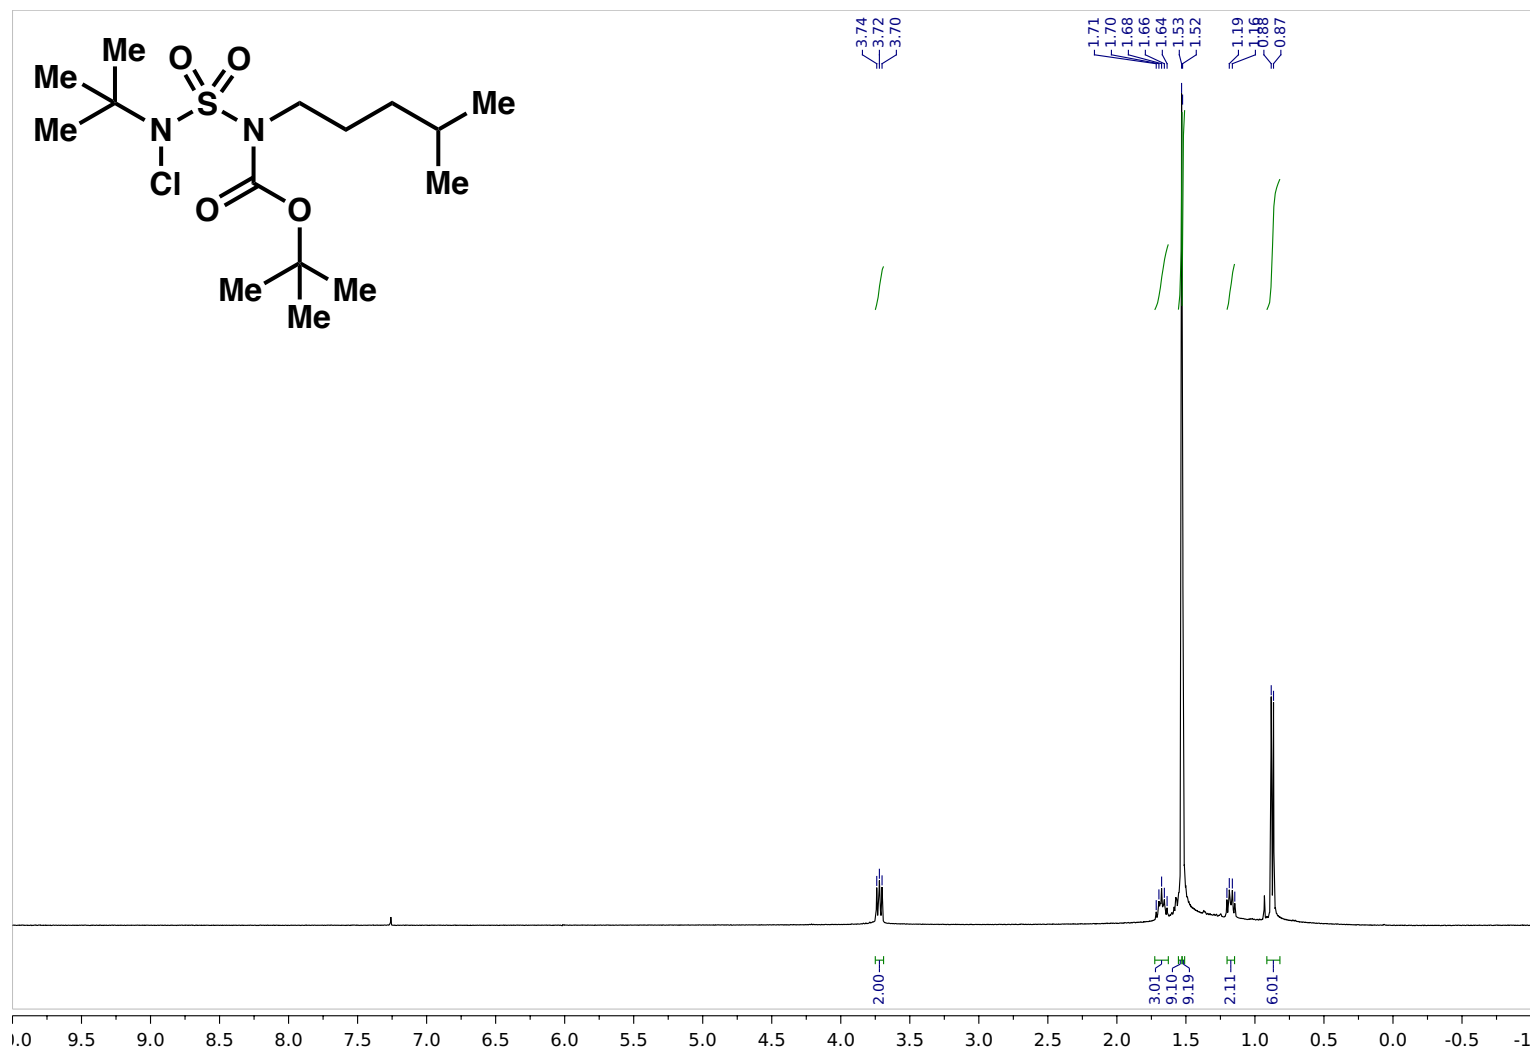

<sup>1</sup>H NMR (400 MHz, CDCl<sub>3</sub>) for *N*-*tert*-butoxycarbonyl-*N'*-*tert*-butyl-*N'*-chloro-*N*-4-methylpentylsulfamide (**1q**)

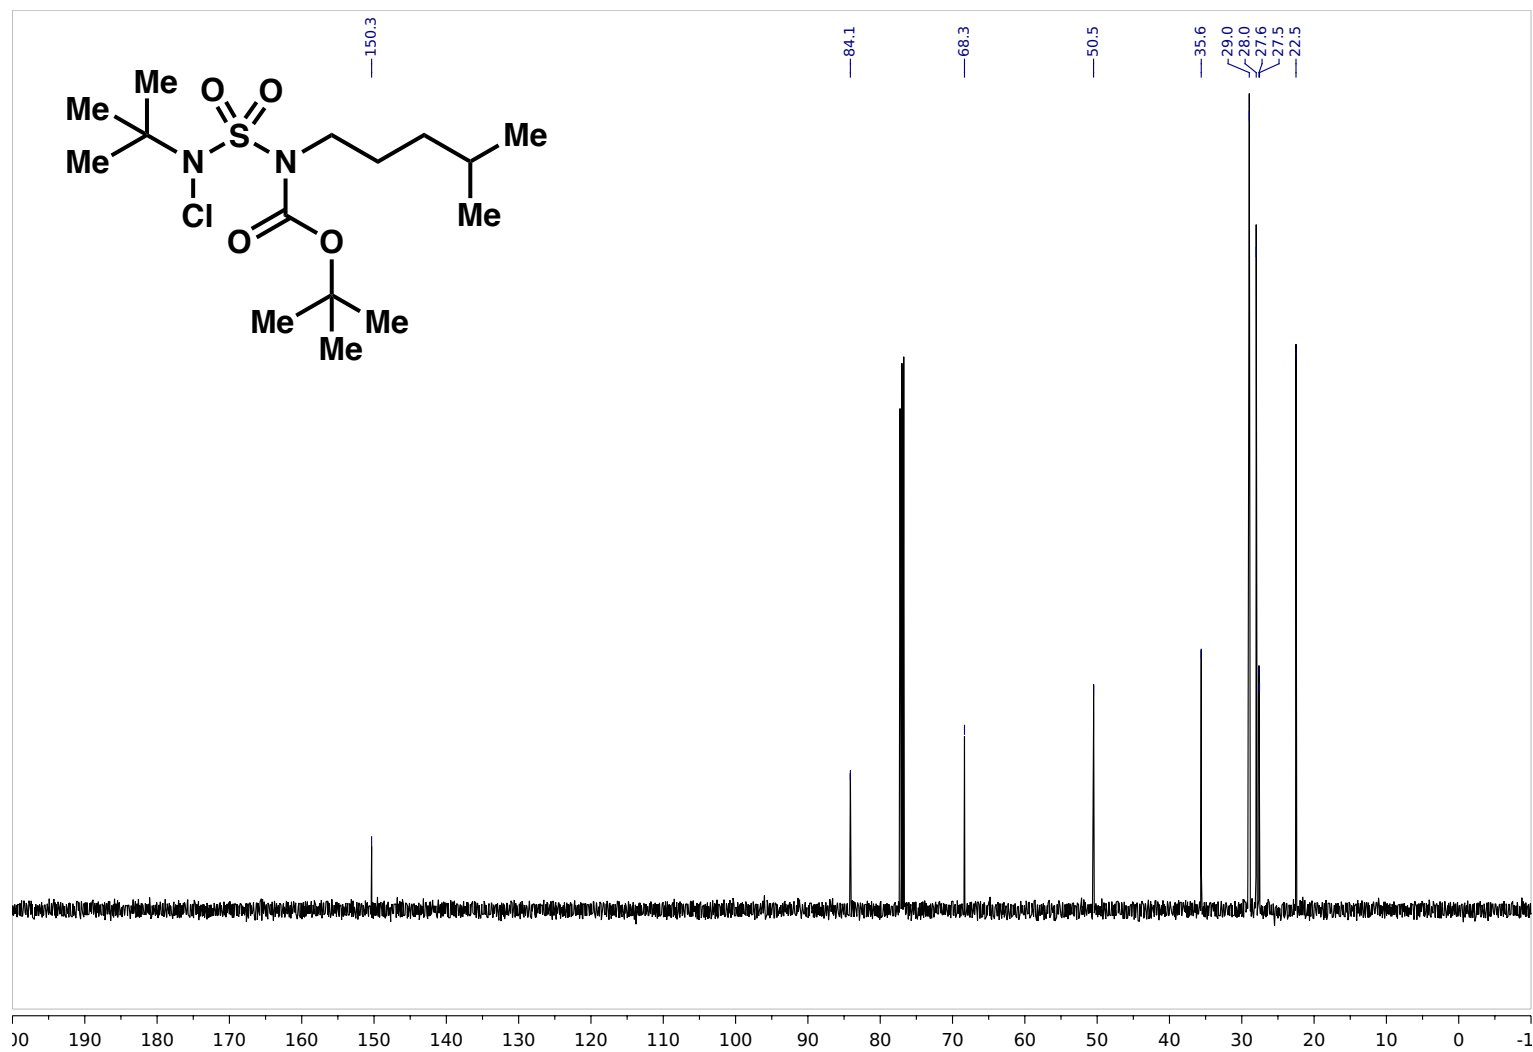

<sup>13</sup>C NMR (126 MHz, CDCl<sub>3</sub>) for *N*-*tert*-butoxycarbonyl-*N'*-*tert*-butyl-*N'*-chloro-*N*-4-methylpentylsulfamide (**1q**)

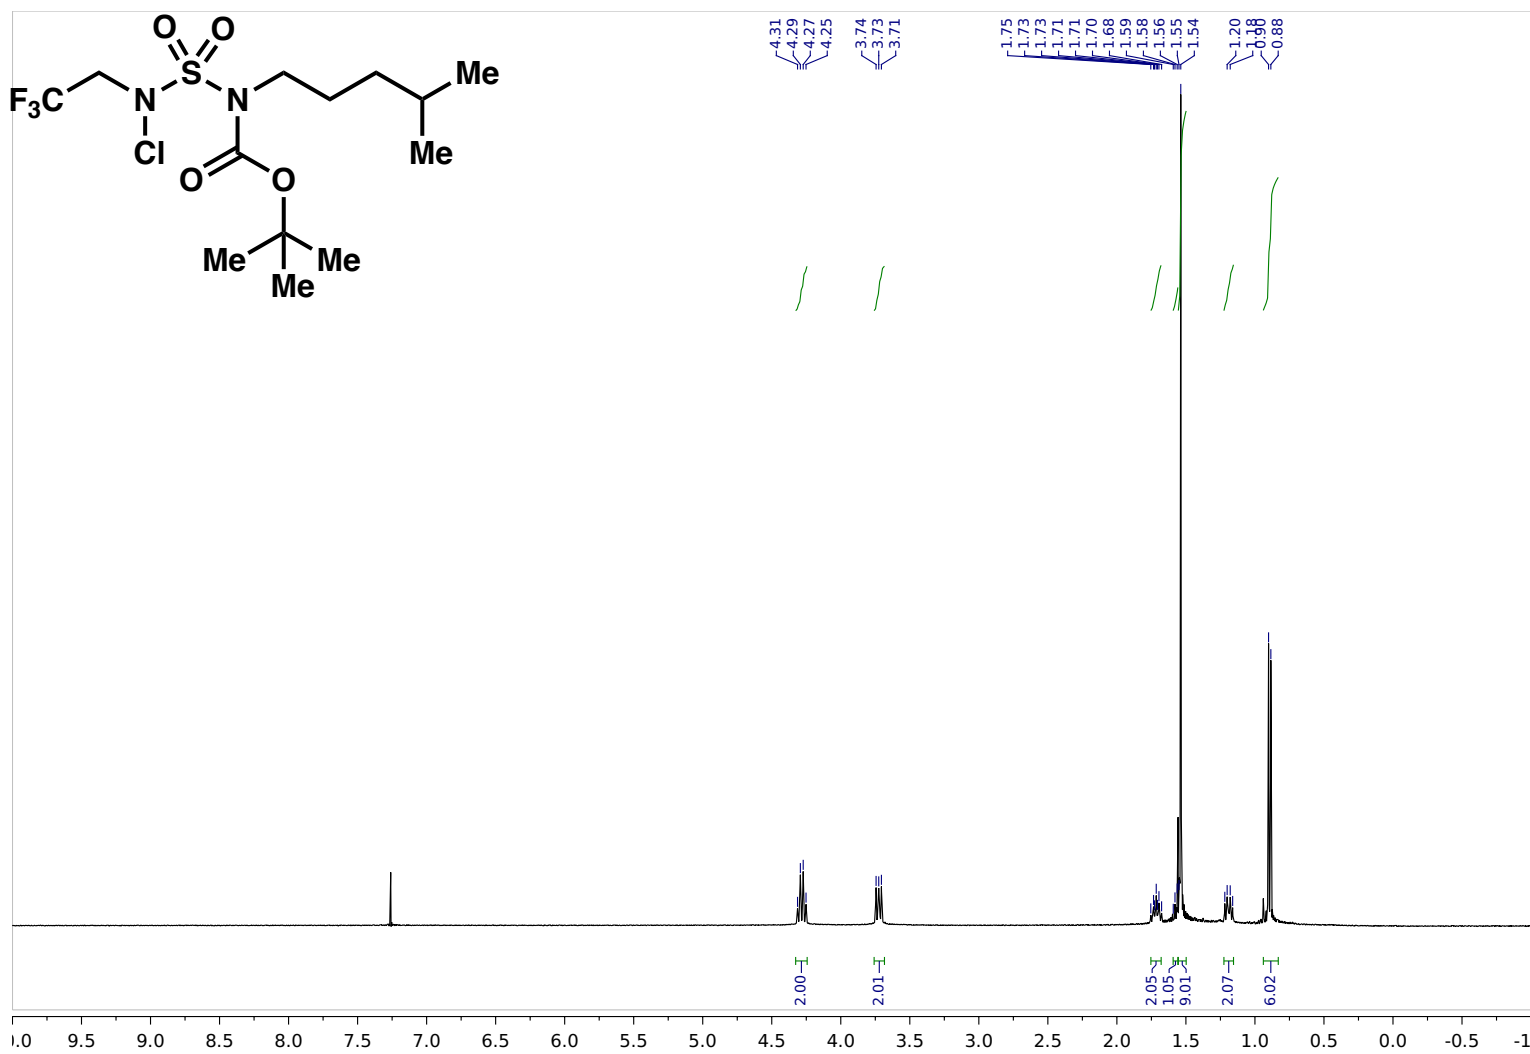

<sup>1</sup>H NMR (400 MHz, CDCl<sub>3</sub>) for *N-tert*-Butoxycarbonyl-*N'*-chloro-*N*-4-methylpentyl-*N'*-(2,2,2-trifluoroethyl)sulfamide (**1r**)



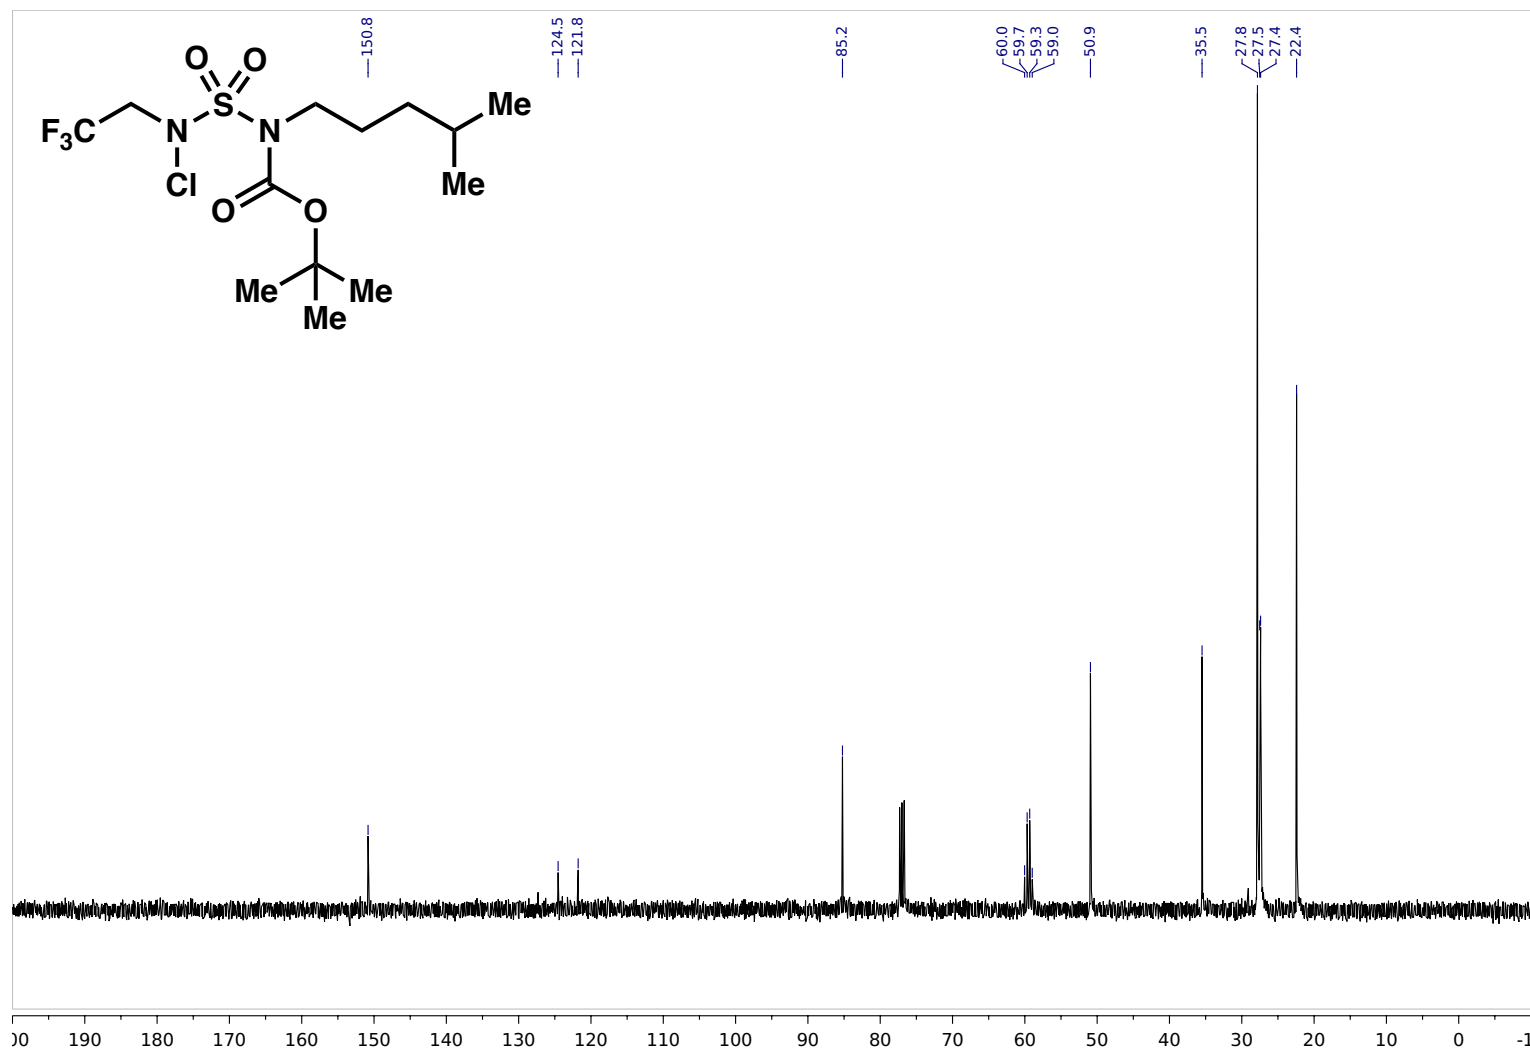

<sup>13</sup>C NMR (101 MHz, CDCl<sub>3</sub>) for *N*-*tert*-Butoxycarbonyl-*N'*-chloro-*N*-4-methylpentyl-*N'*-(2,2,2-trifluoroethyl)sulfamide (**1r**)

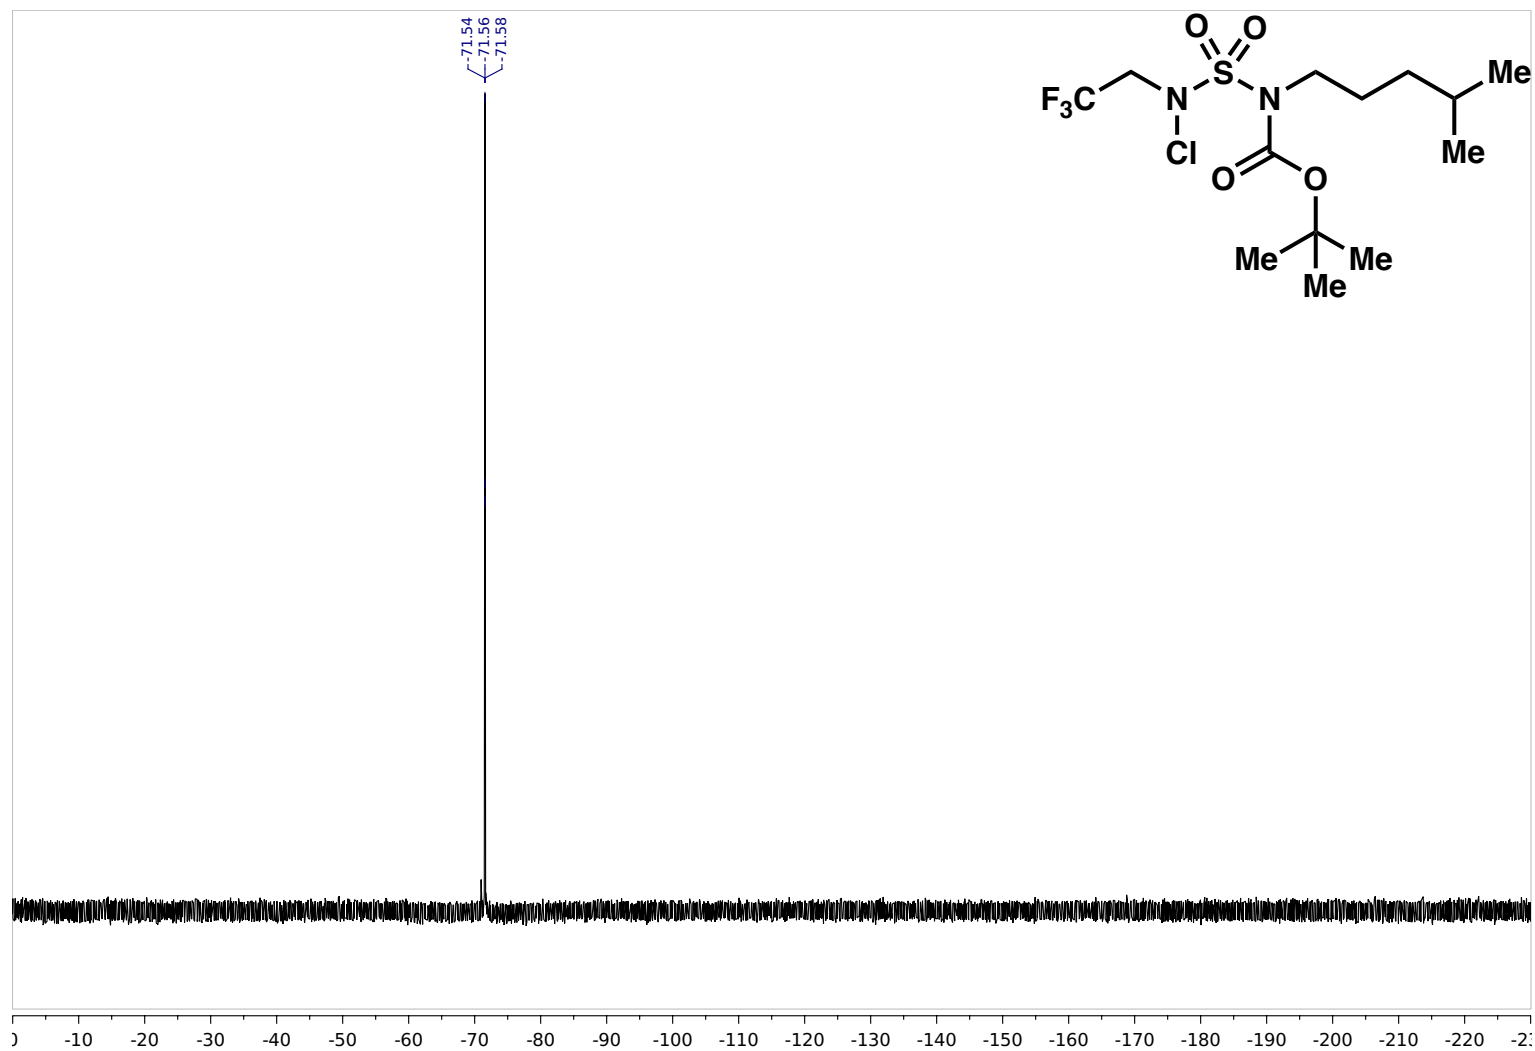

$^{19}\text{F}$  NMR (376 MHz,  $\text{CDCl}_3$ ) for *N*-*tert*-Butoxycarbonyl-*N'*-chloro-*N'*-4-methylpentyl-*N'*-(2,2,2-trifluoroethyl)sulfamide (**1r**)

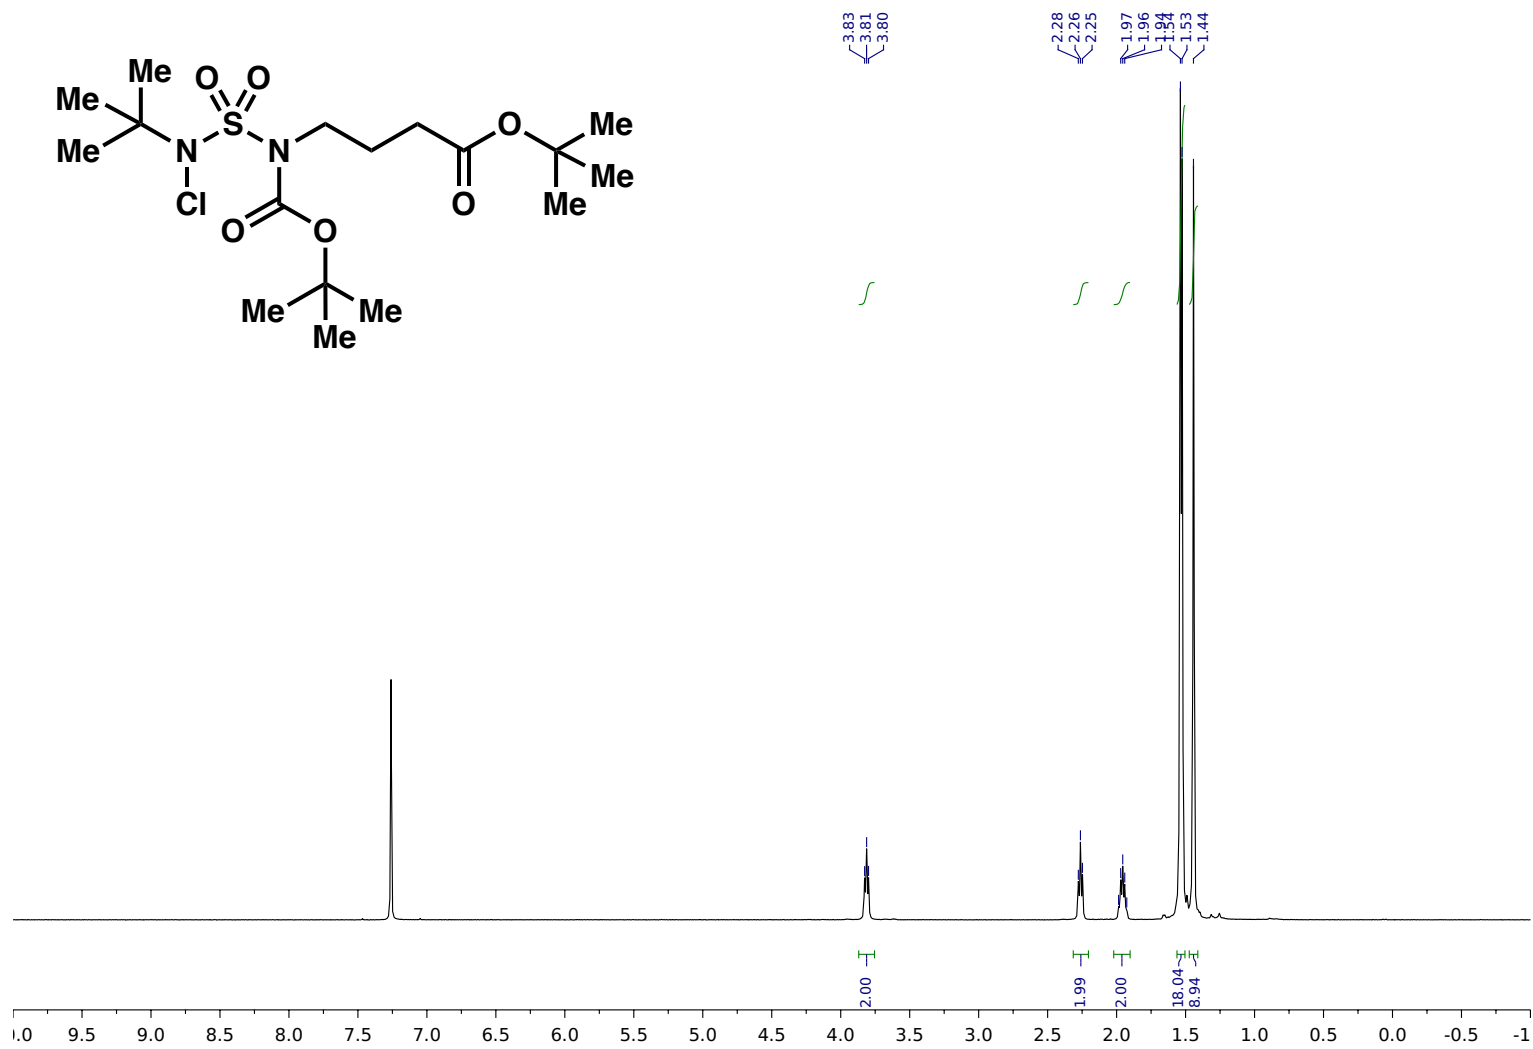

<sup>1</sup>H NMR (400 MHz, CDCl<sub>3</sub>) for *N*-*tert*-butoxycarbonyl-*N'*-*tert*-butyl-*N*-(*tert*-butyl butano-4-yl)-*N'*-chlorosulfamide (**S9t**)

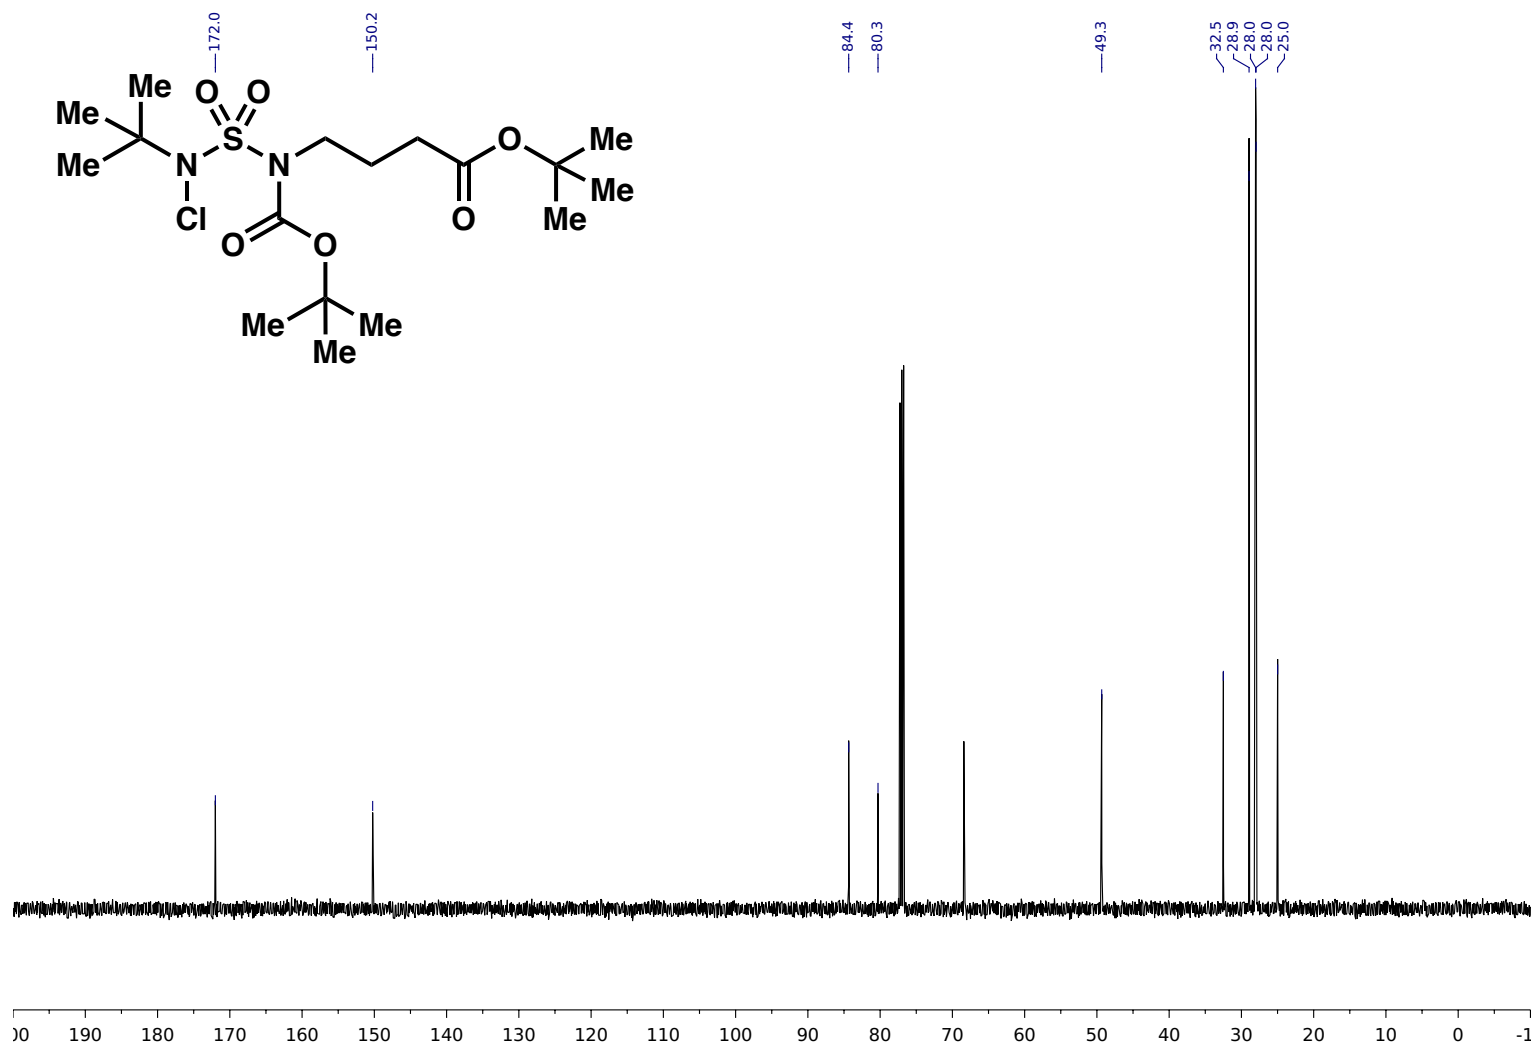

$^{13}\text{C}$  NMR (126 MHz,  $\text{CDCl}_3$ ) for *N*-*tert*-butoxycarbonyl-*N'*-*tert*-butyl-*N*-(*tert*-butyl butano-4-yl)-*N'*-chlorosulfamide (**S9t**)

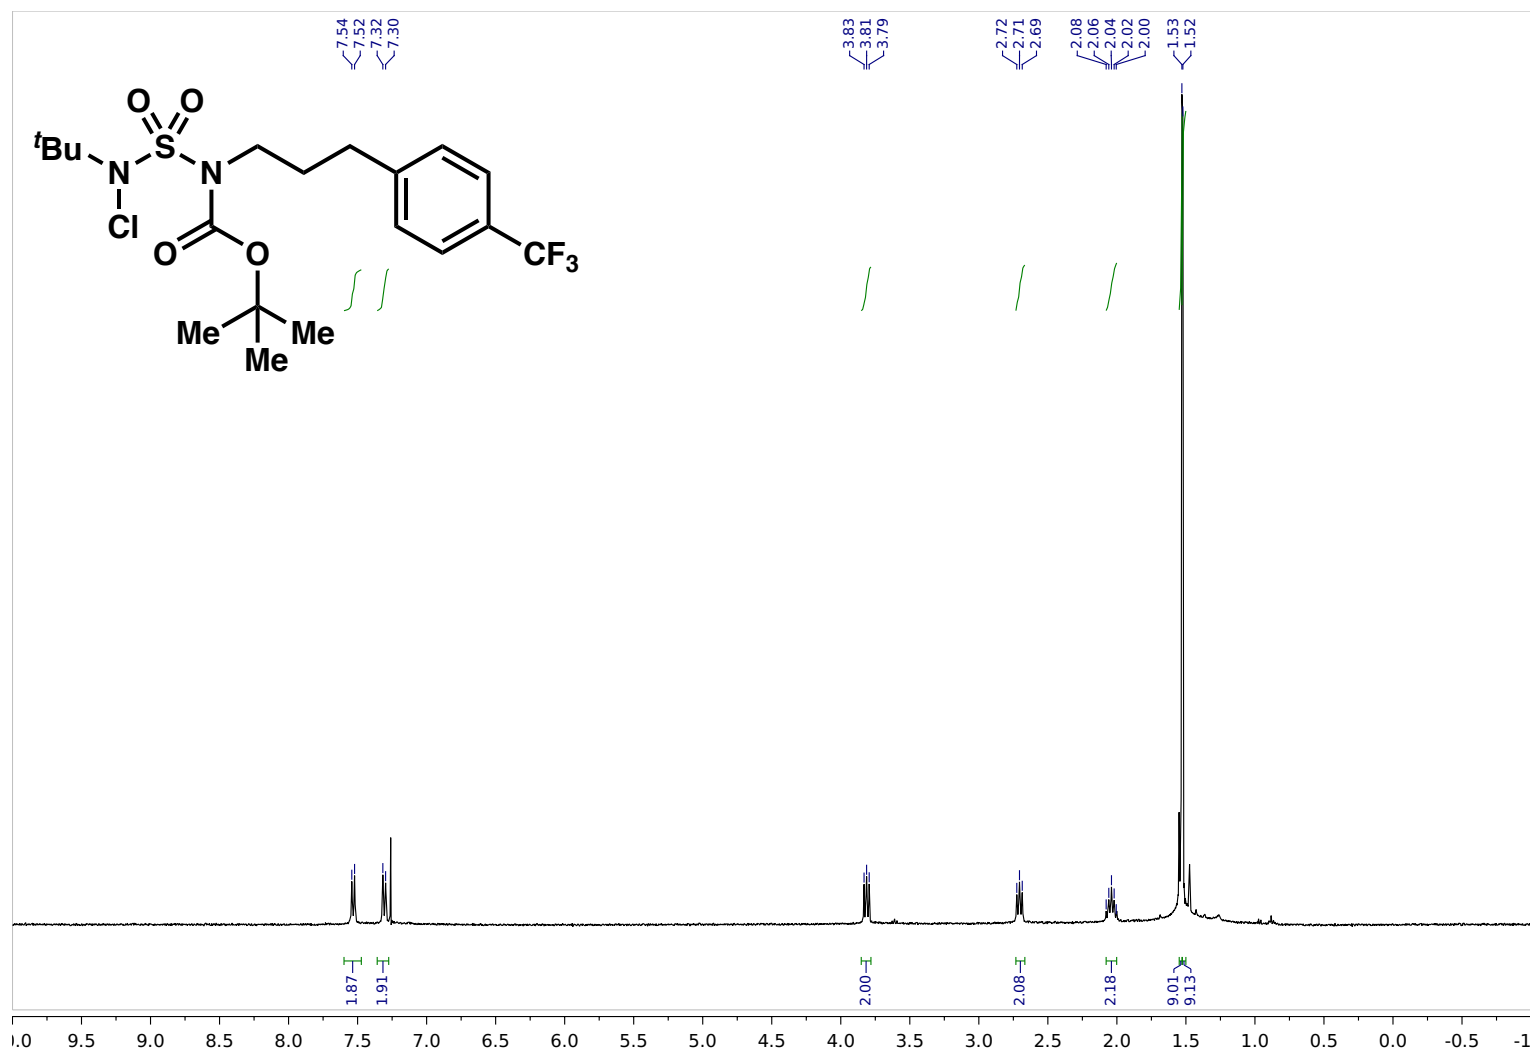

<sup>1</sup>H NMR (400 MHz, CDCl<sub>3</sub>) for *N*-tert-butoxycarbonyl-*N'*-tert-butyl-*N'*-chloro-*N*-(3-((4-trifluoromethyl)phenyl)prop-1-yl)sulfamide (**S9u**)

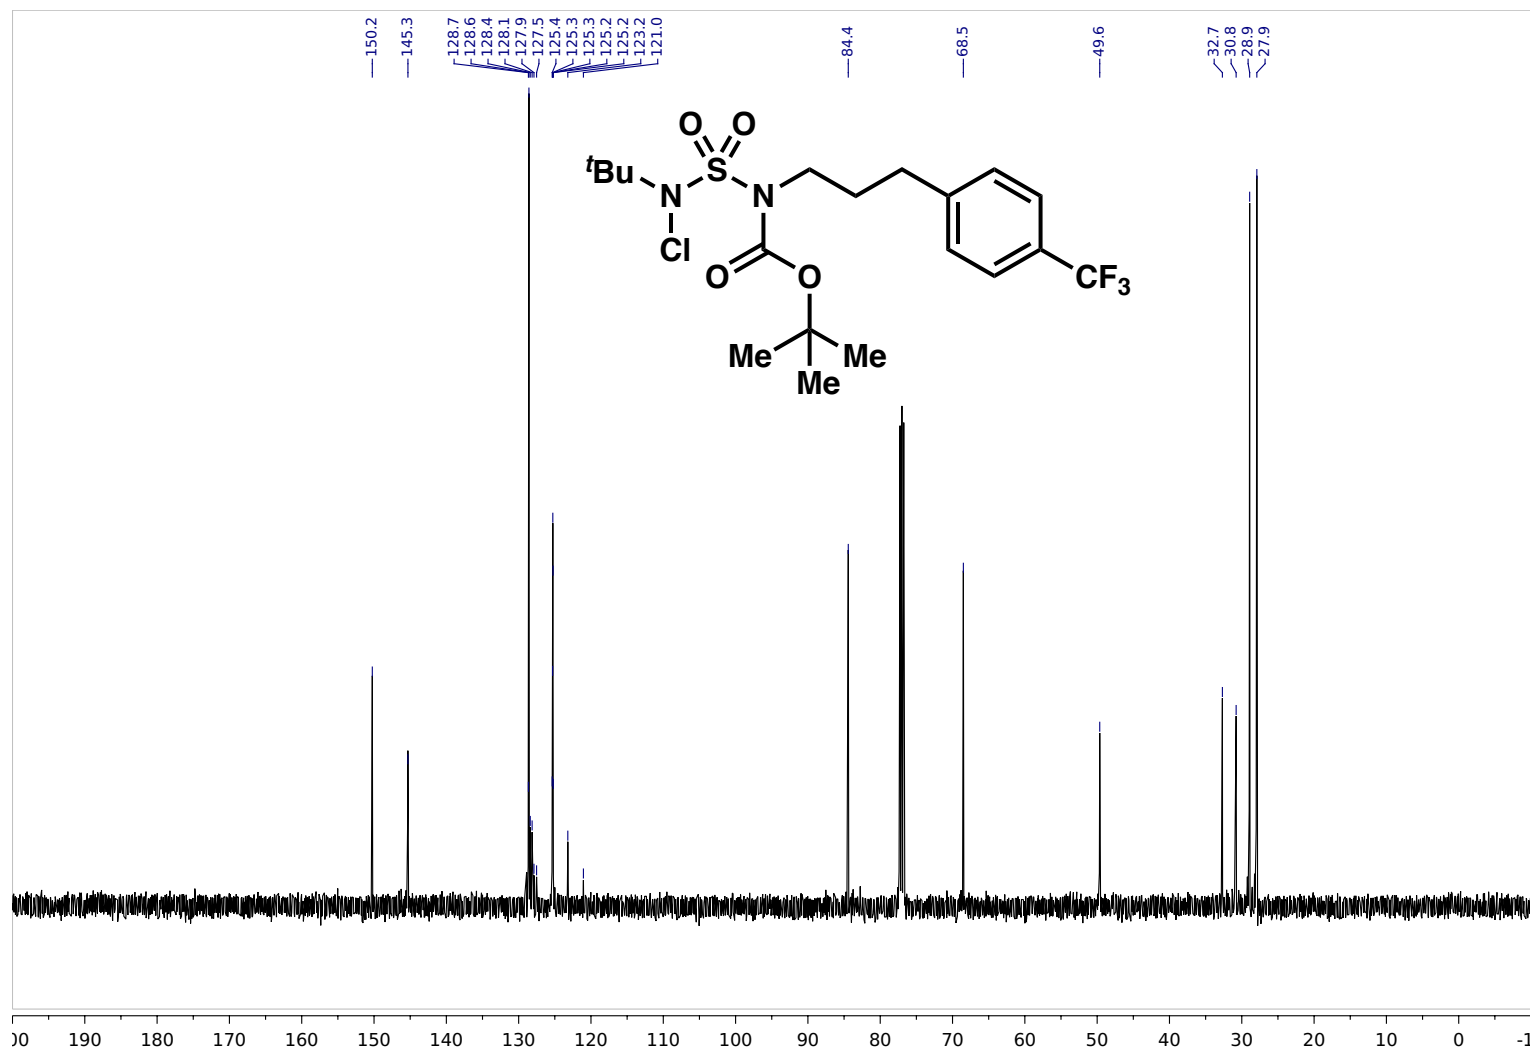

<sup>13</sup>C NMR (126 MHz, CDCl<sub>3</sub>) for *N*-*tert*-butoxycarbonyl-*N'*-*tert*-butyl-*N'*-chloro-*N*-(3-((4-trifluoromethyl)phenyl)prop-1-yl)sulfamide (S9u)

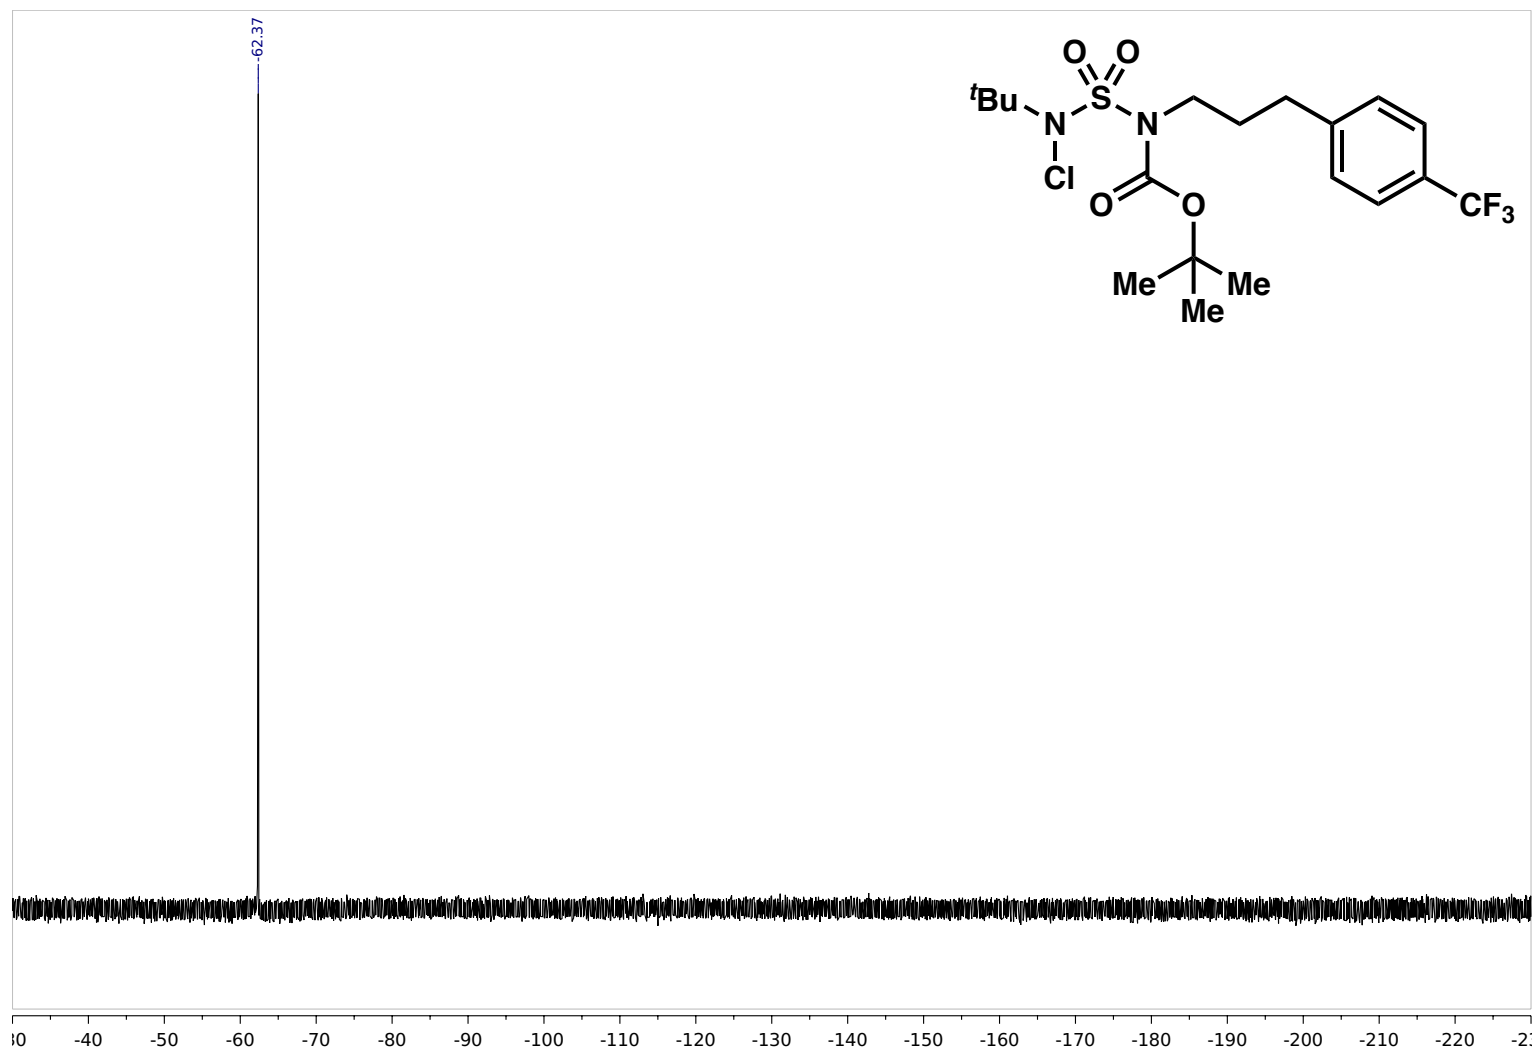

$^{19}\text{F}$  NMR (376 MHz,  $\text{CDCl}_3$ ) for  $N$ -tert-butoxycarbonyl- $N'$ -tert-butyl- $N'$ -chloro- $N$ -(3-((4-trifluoromethyl)phenyl)prop-1-yl)sulfamide (**S9u**)

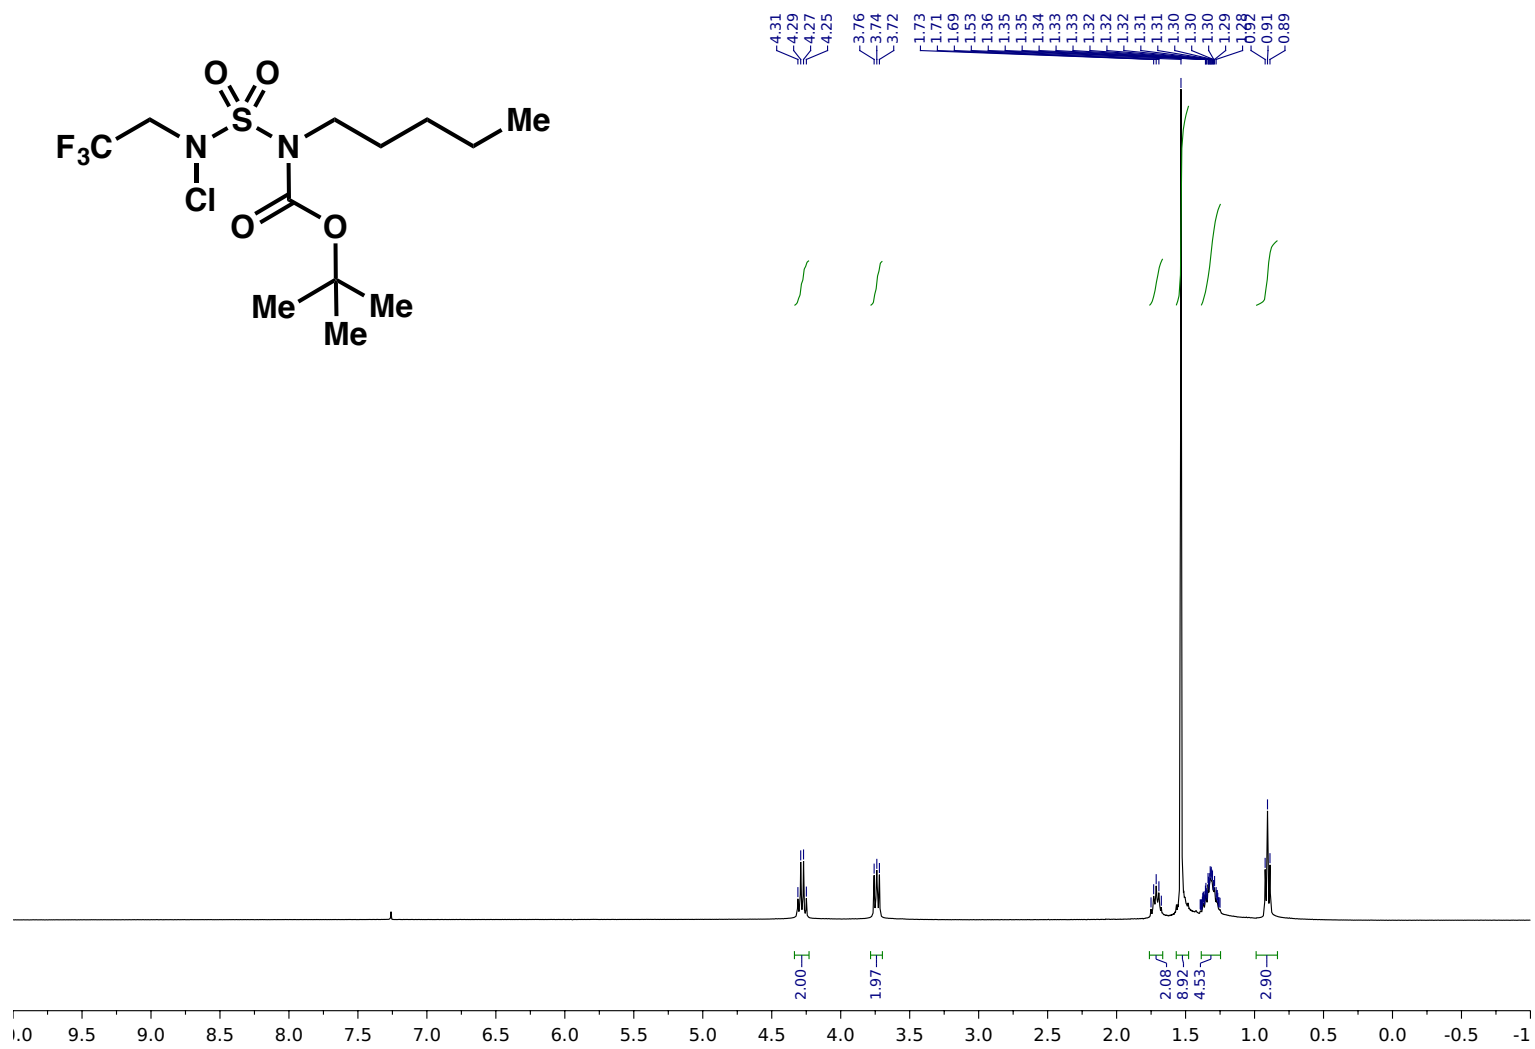

<sup>1</sup>H NMR (400 MHz, CDCl<sub>3</sub>) for *N-tert-butoxycarbonyl-N'-chloro-N'-(2,2,2-trifluoroethyl)-N-pentylsulfamide (S9v)*



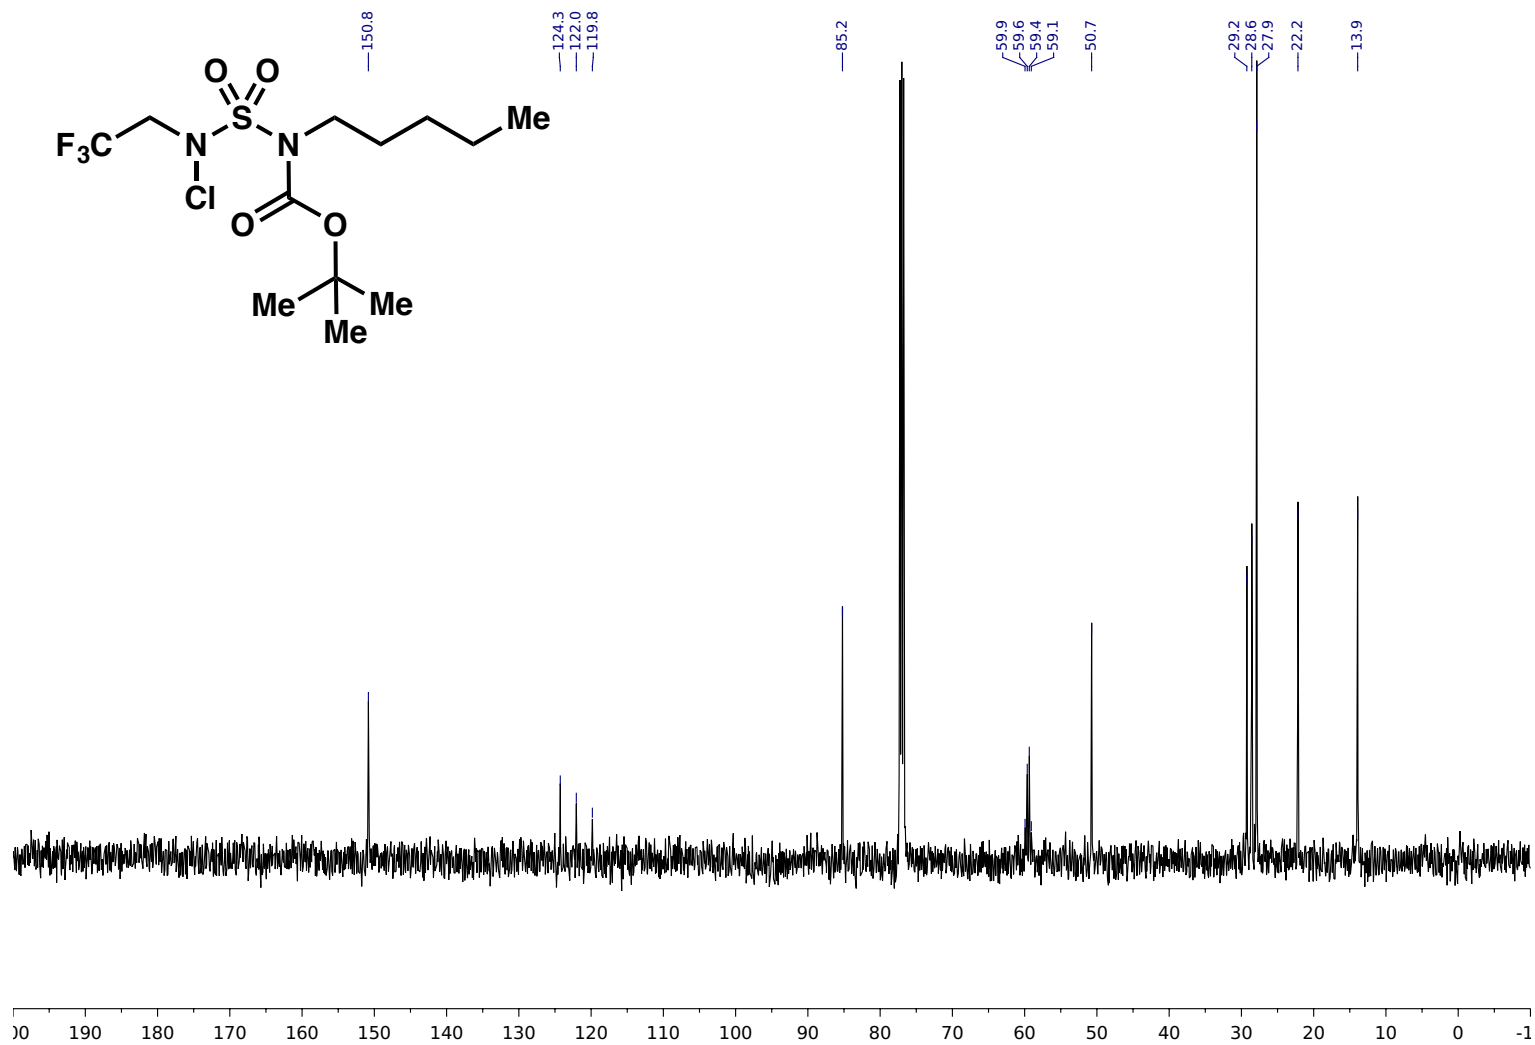

$^{13}\text{C}$  NMR (126 MHz,  $\text{CDCl}_3$ ) for *N-tert-butoxycarbonyl-N'-chloro-N'-(2,2,2-trifluoroethyl)-N-pentylsulfamide (S9v)*

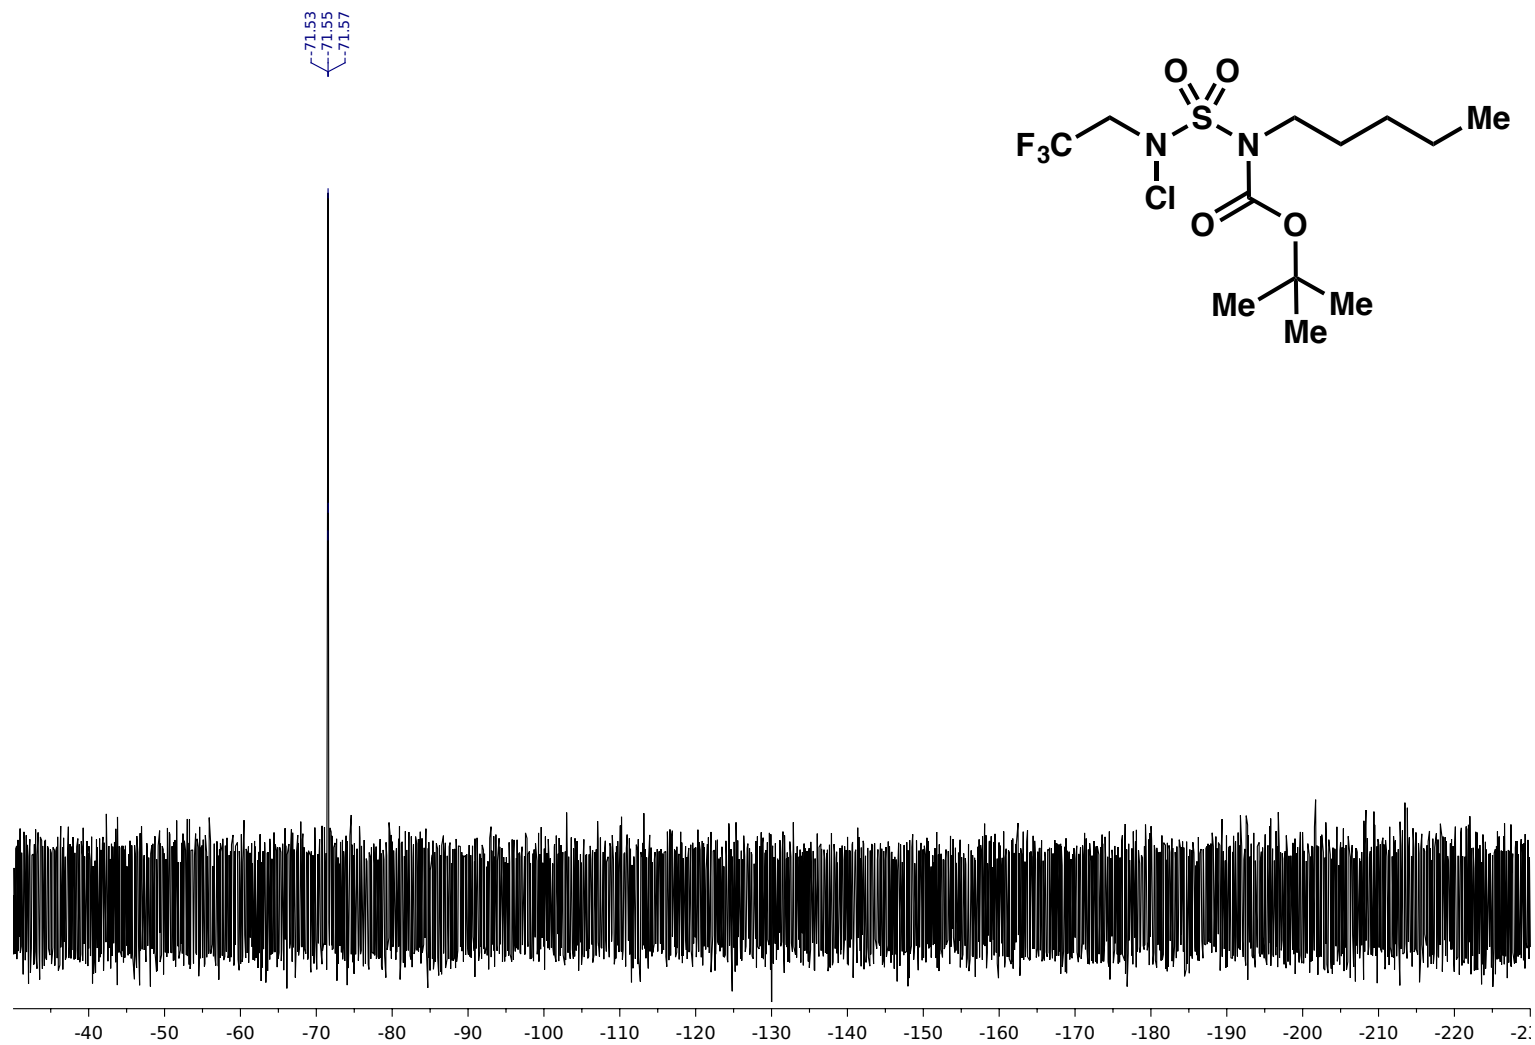

$^{19}\text{F}$  NMR (376 MHz,  $\text{CDCl}_3$ ) for *N-tert*-butoxycarbonyl-*N'*-chloro-*N'*-(2,2,2-trifluoroethyl)-*N*-pentylsulfamide (S9v)

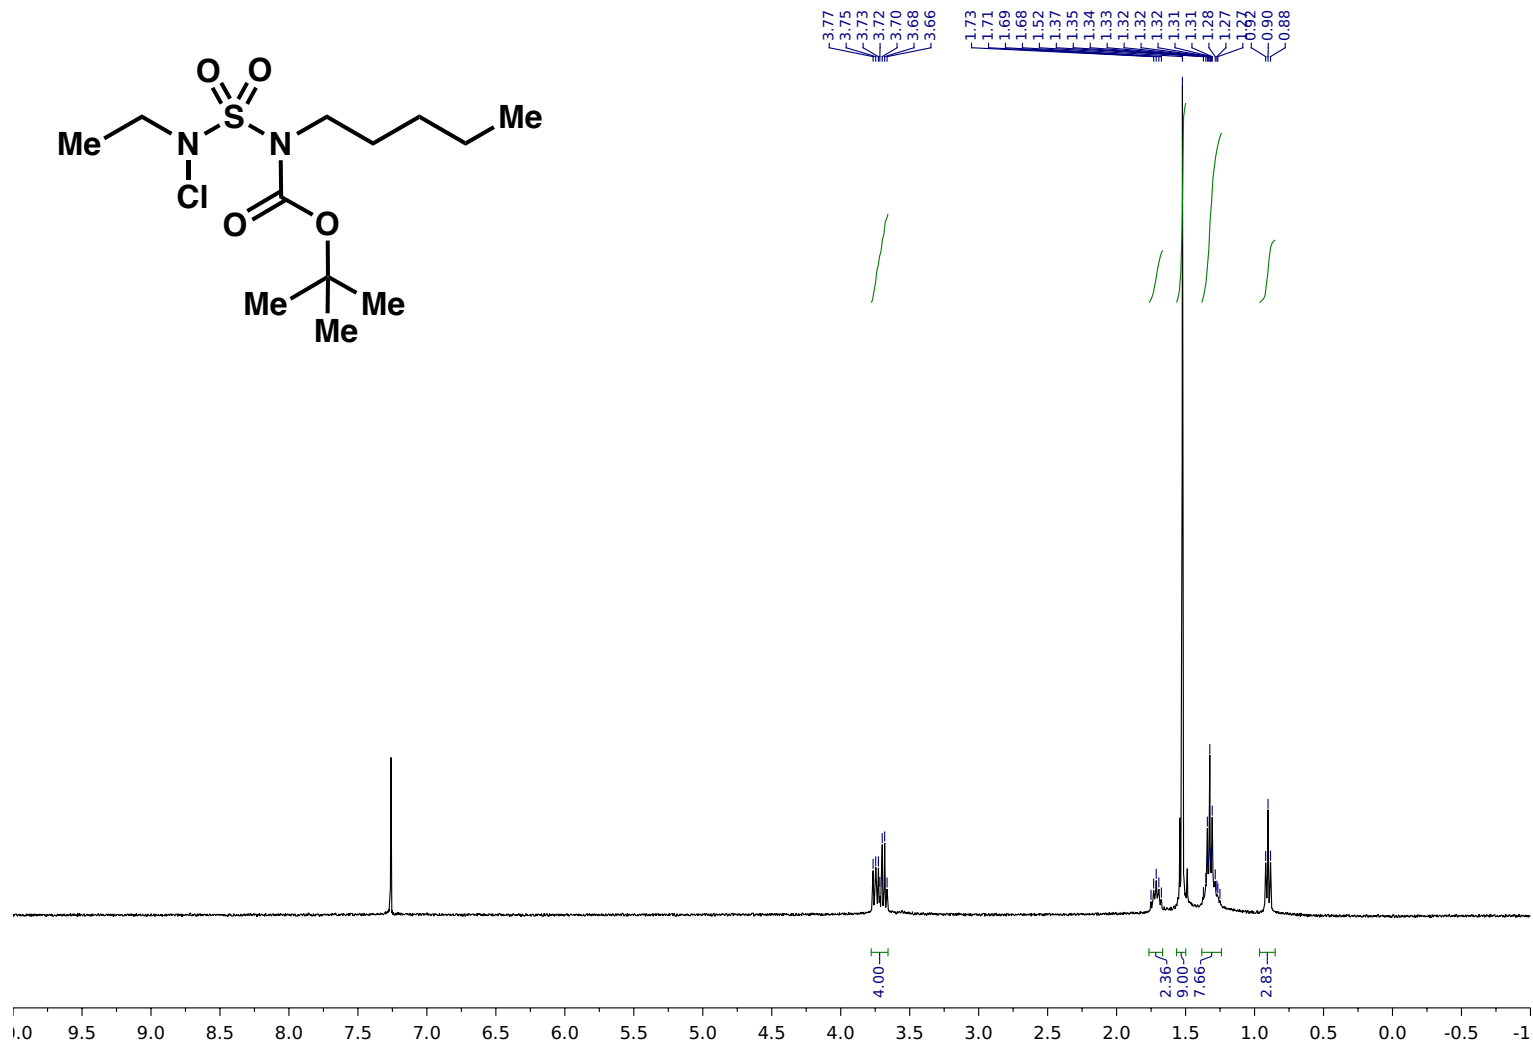

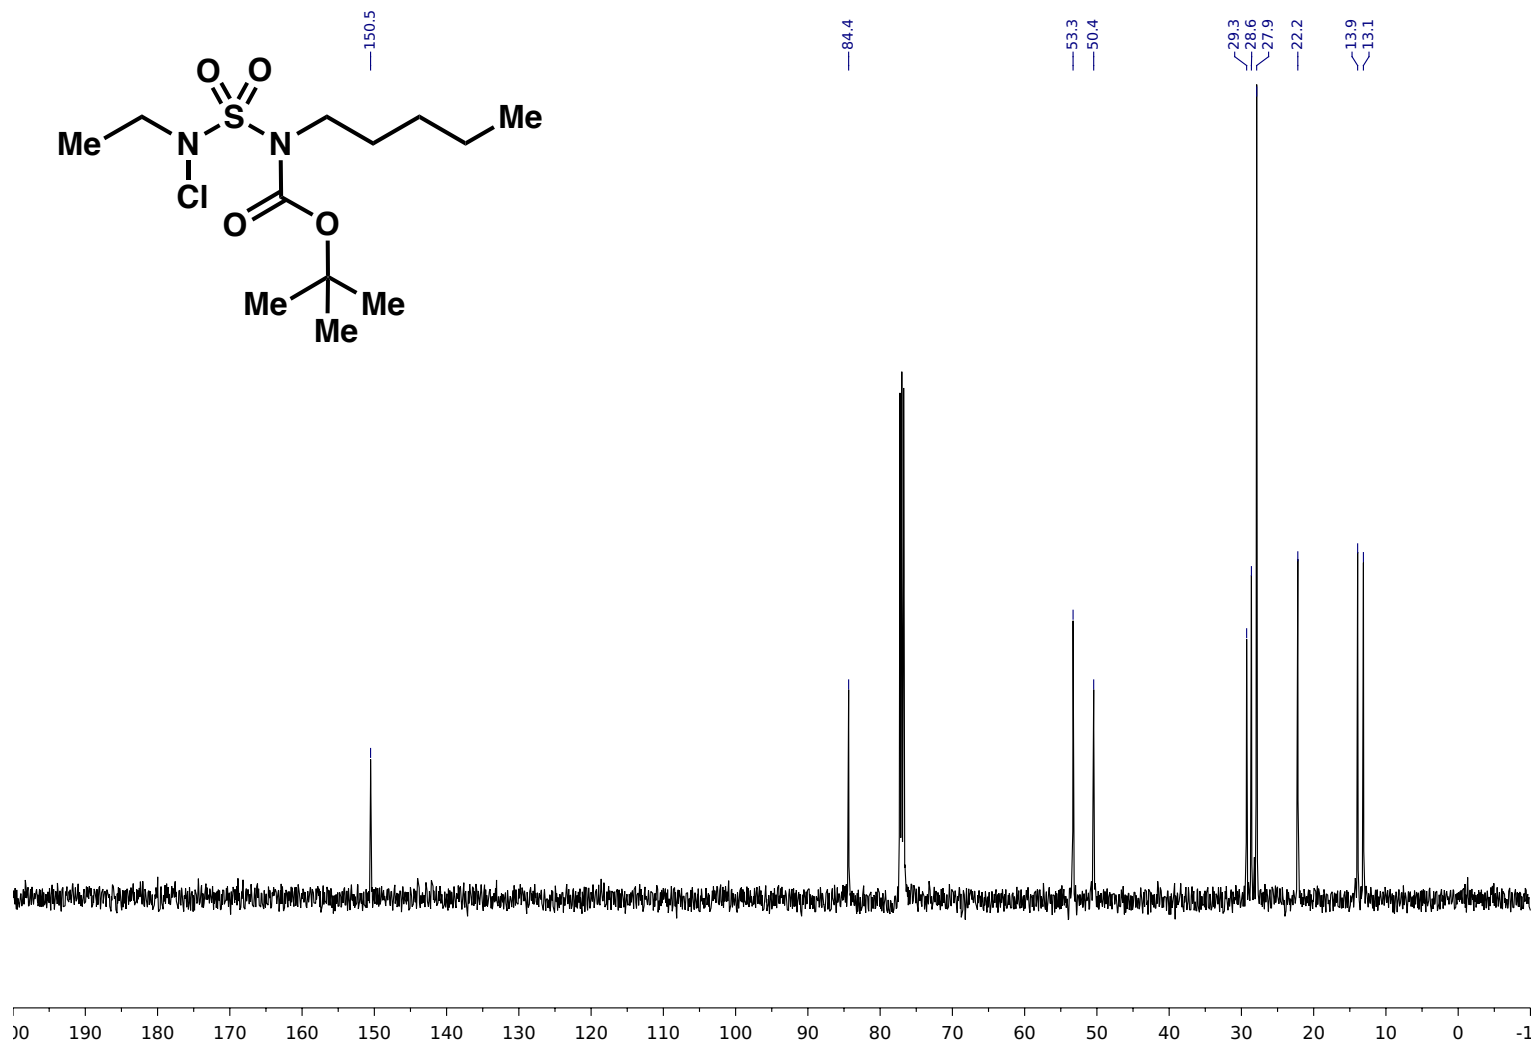

<sup>13</sup>C NMR (126 MHz, CDCl<sub>3</sub>) for *N-tert-butoxycarbonyl-N'-chloro-N'-ethyl-N-pentylsulfamide* (**S9w**)

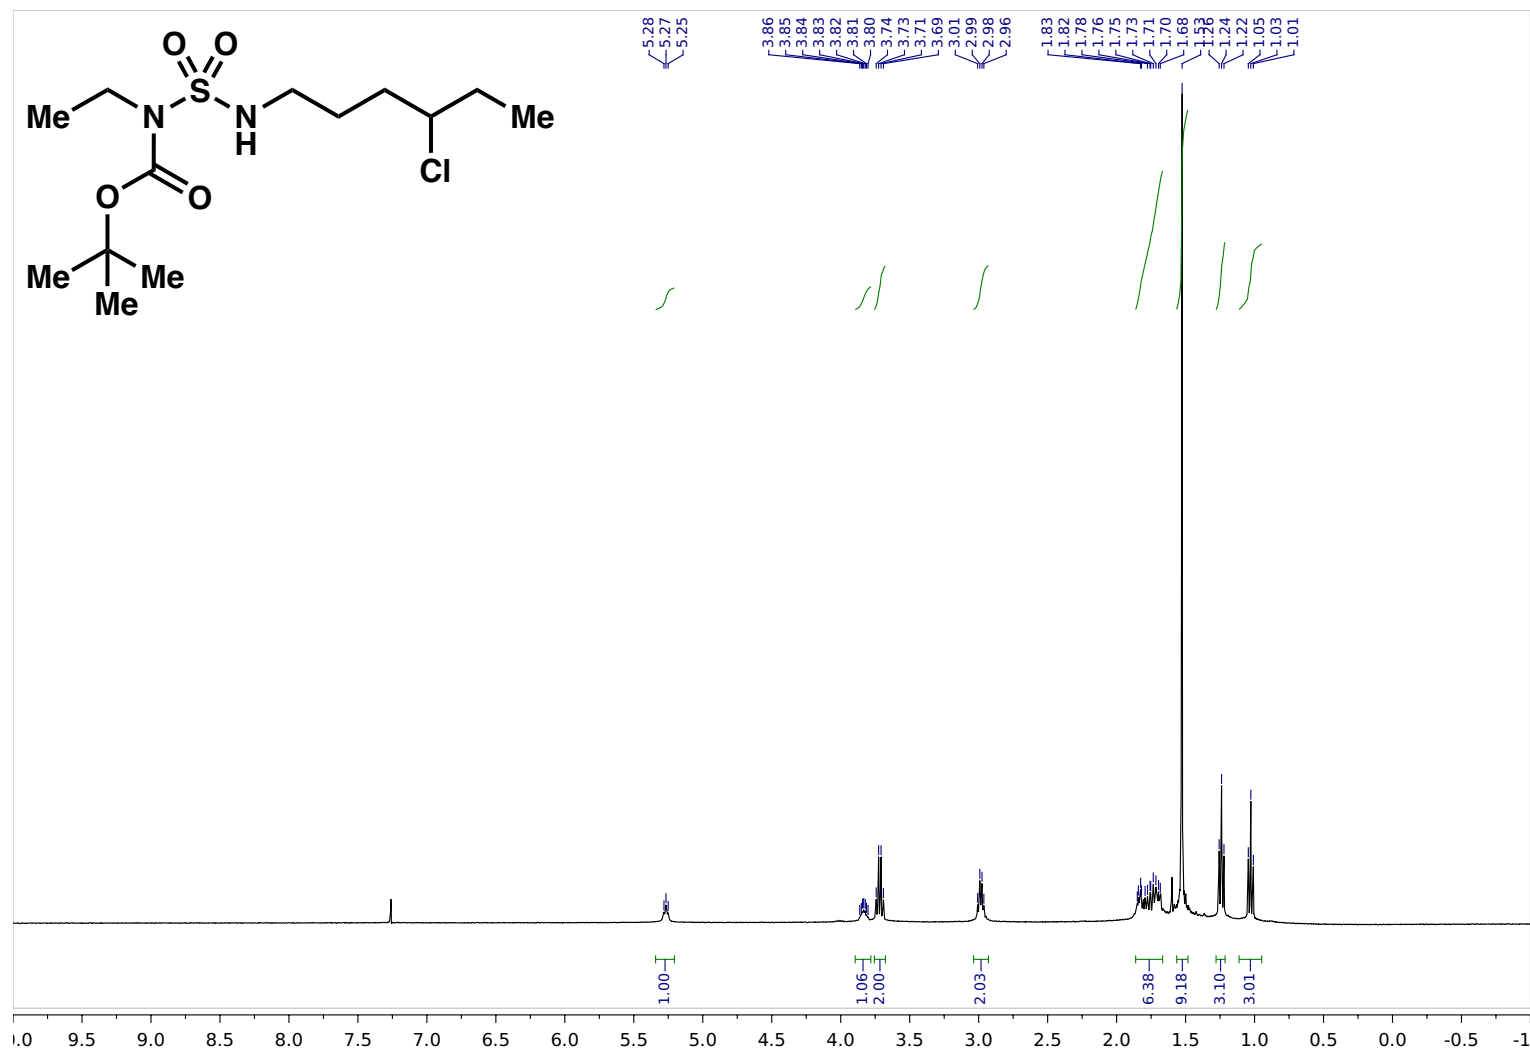

<sup>1</sup>H NMR (400 MHz, CDCl<sub>3</sub>) for *N*-*tert*-butoxycarbonyl-*N'*-(4-chloro)hexyl-*N*-ethylsulfamide (**6a**)

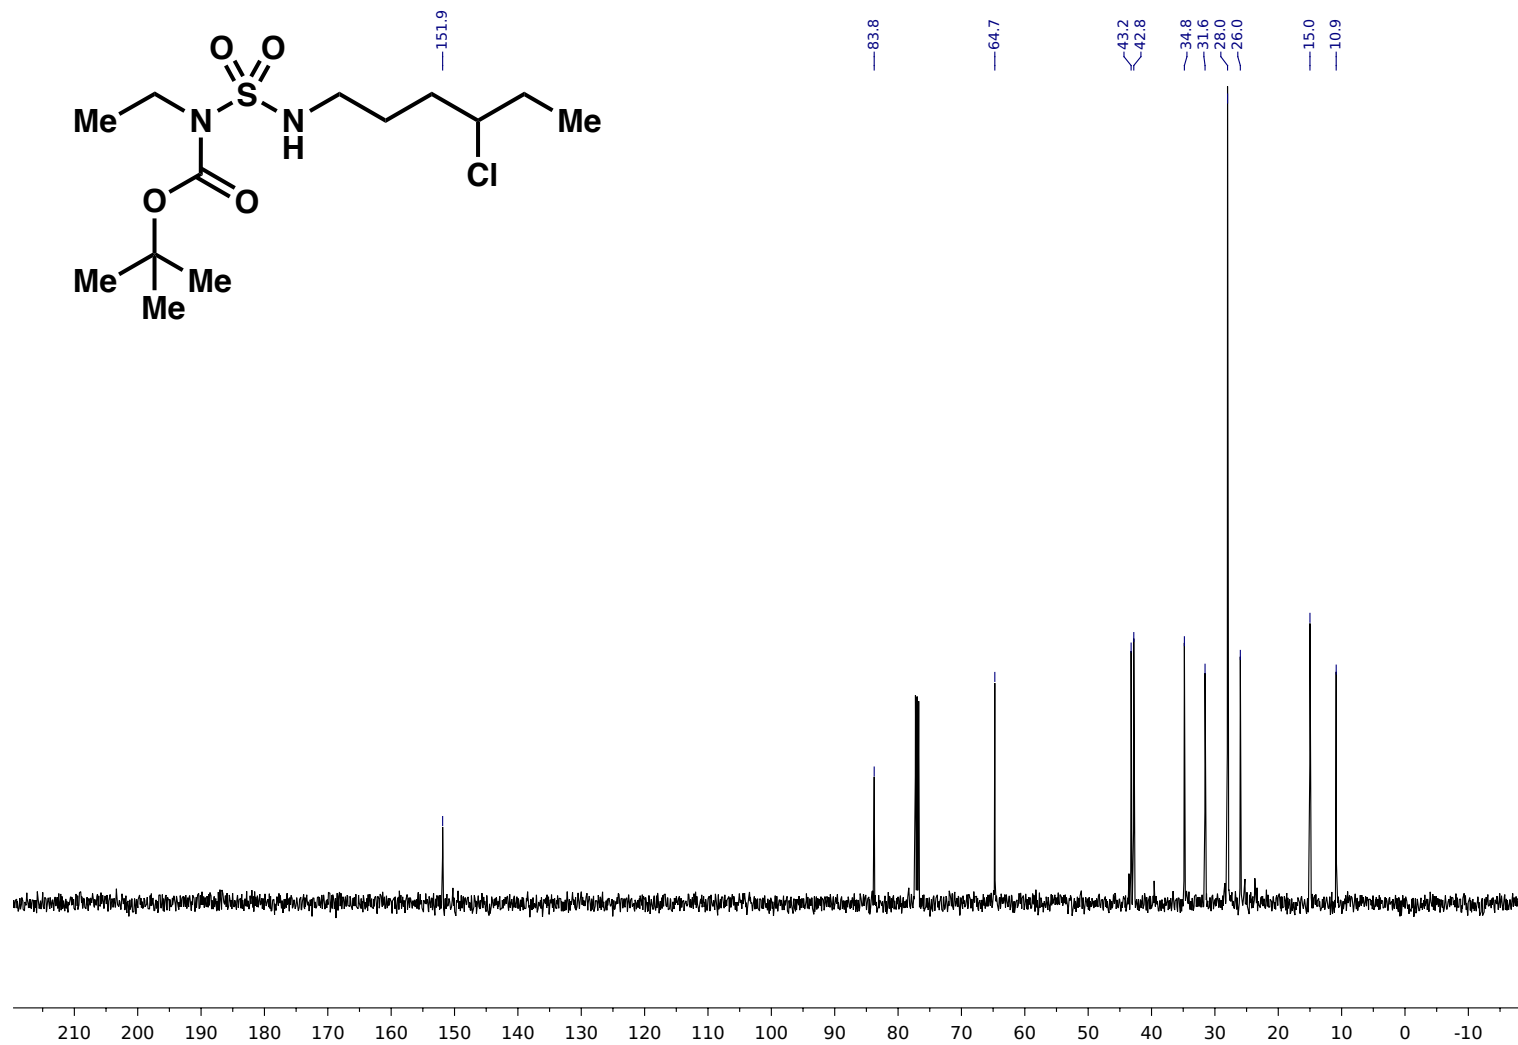

<sup>13</sup>C NMR (126 MHz, CDCl<sub>3</sub>) for *N*-*tert*-butoxycarbonyl-*N'*-(4-chloro)hexyl-*N*-ethylsulfamide (6a)

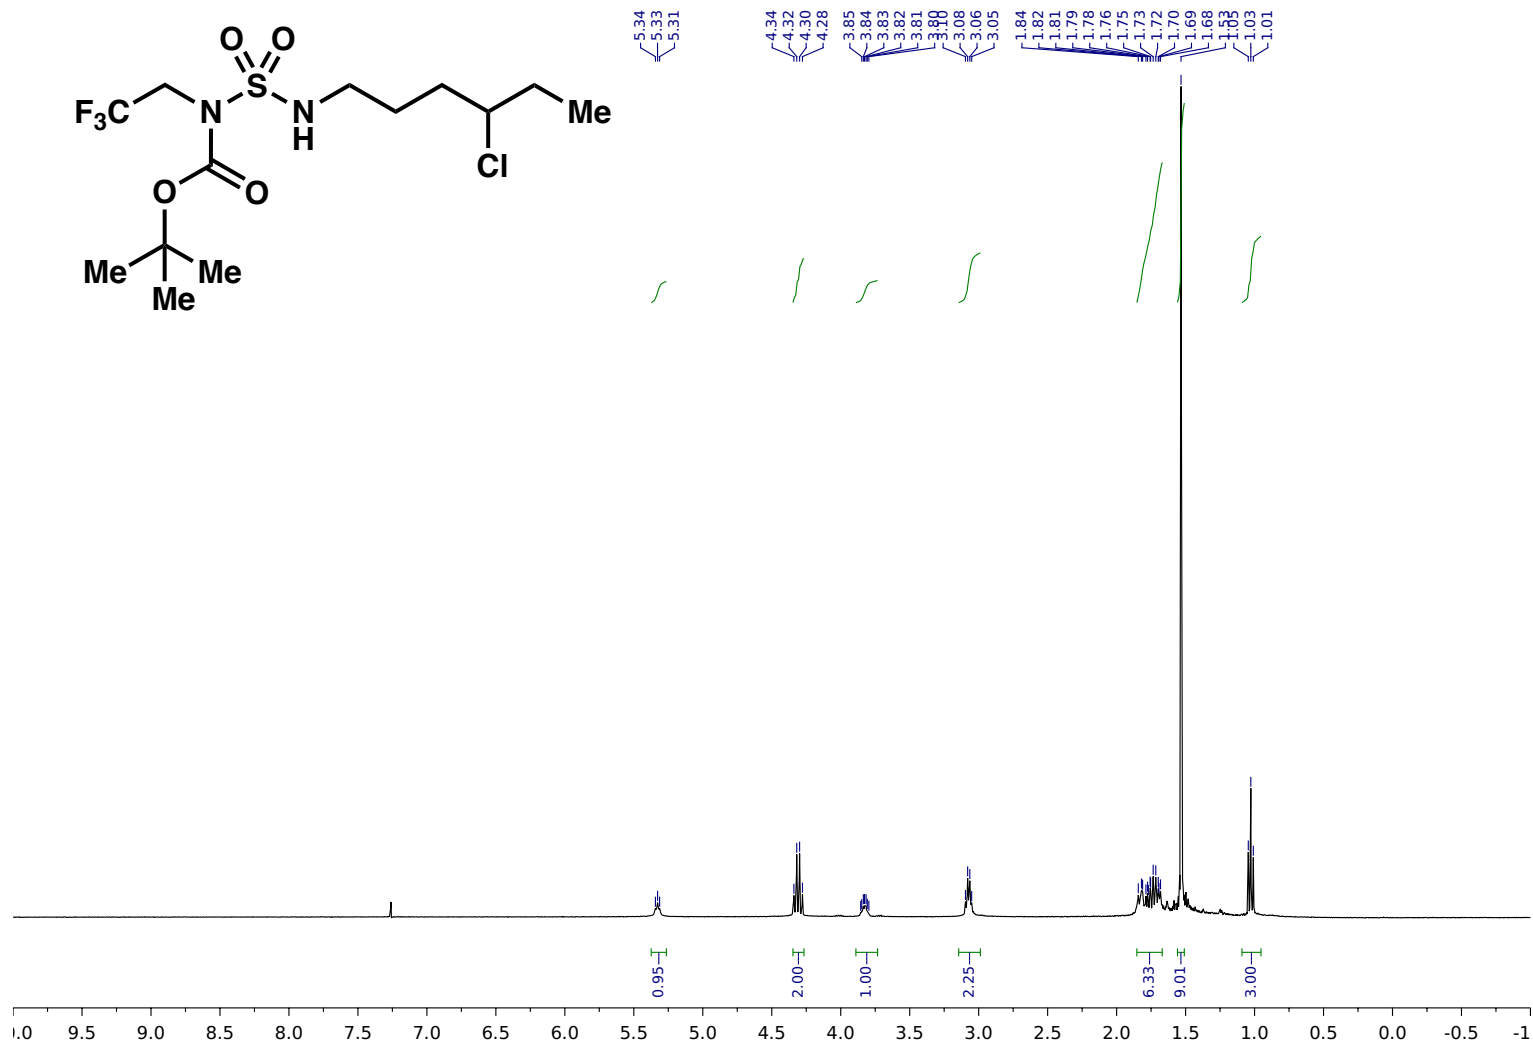

<sup>1</sup>H NMR (400 MHz, CDCl<sub>3</sub>) for *N*-*tert*-butoxycarbonyl-*N'*-(4-chloro)hexyl-*N*-(2,2,2-trifluoro)ethylsulfamide (**6b**)

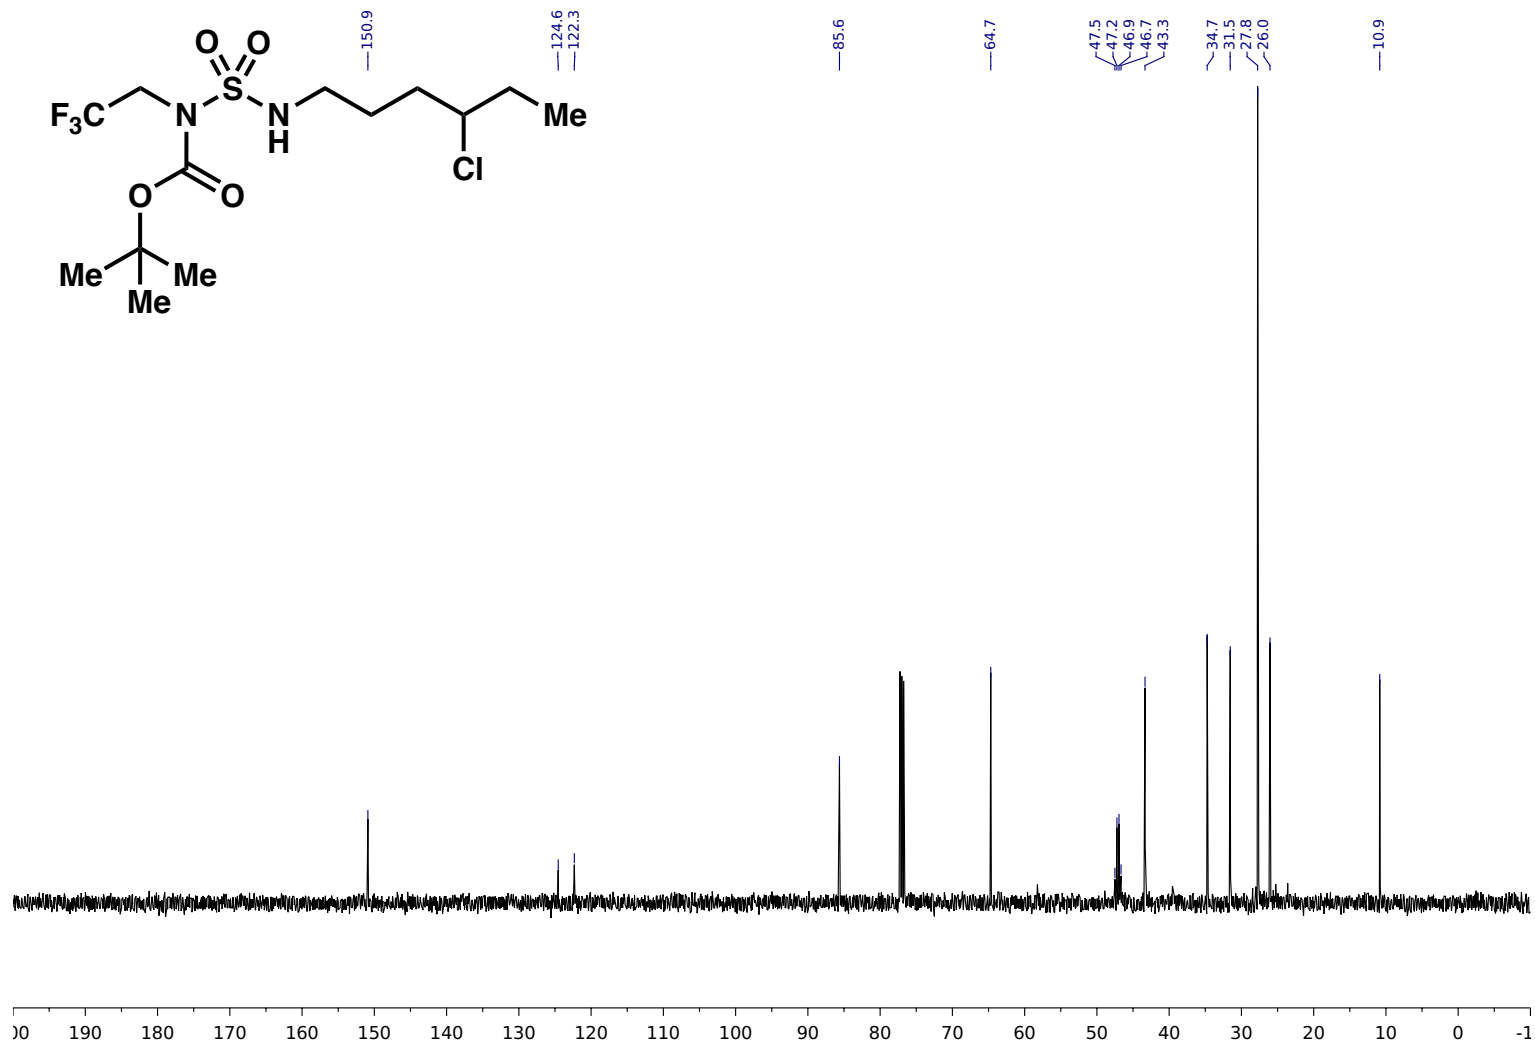

<sup>13</sup>C NMR (126 MHz, CDCl<sub>3</sub>) for *N*-*tert*-butoxycarbonyl-*N'*-(4-chloro)hexyl-*N*-(2,2,2-trifluoro)ethylsulfamide (**6b**)



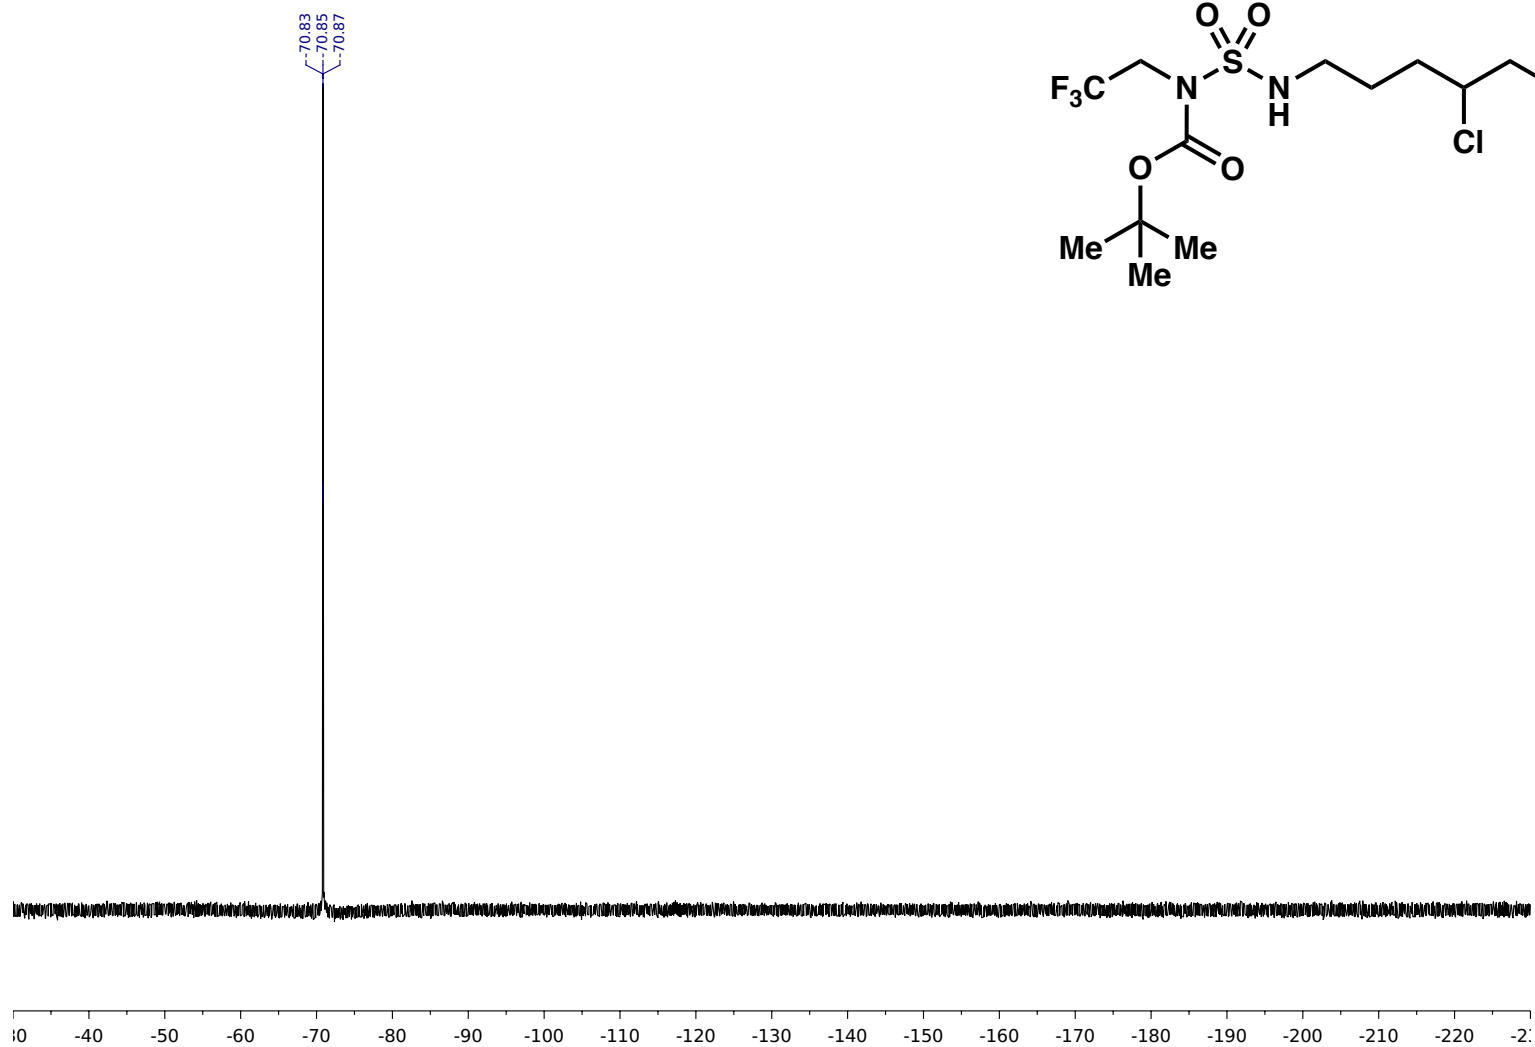

$^{19}\text{F}$  NMR (376 MHz,  $\text{CDCl}_3$ ) for *N-tert*-butoxycarbonyl-*N'*-(4-chloro)hexyl-*N*-(2,2,2-trifluoro)ethylsulfamide (**6b**)

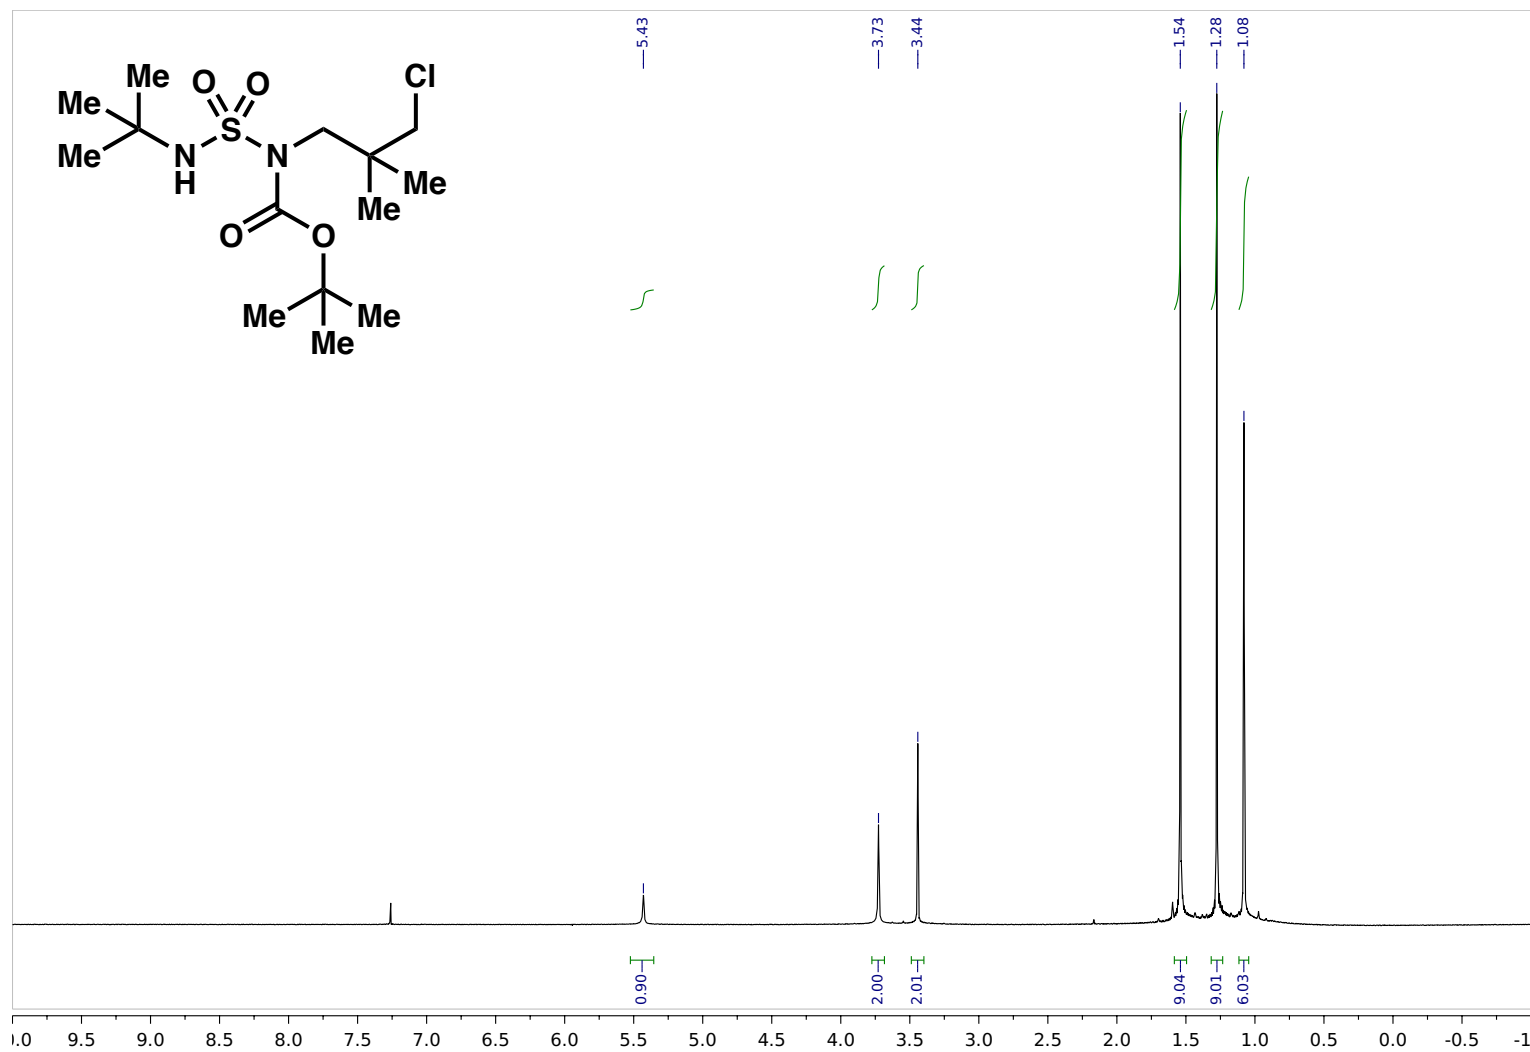

<sup>1</sup>H NMR (400 MHz, CDCl<sub>3</sub>) for *N*-*tert*-butoxycarbonyl-*N'*-*tert*-butyl-*N*-(3-chloro-2,2-dimethylprop-1-yl)sulfamide (4a)

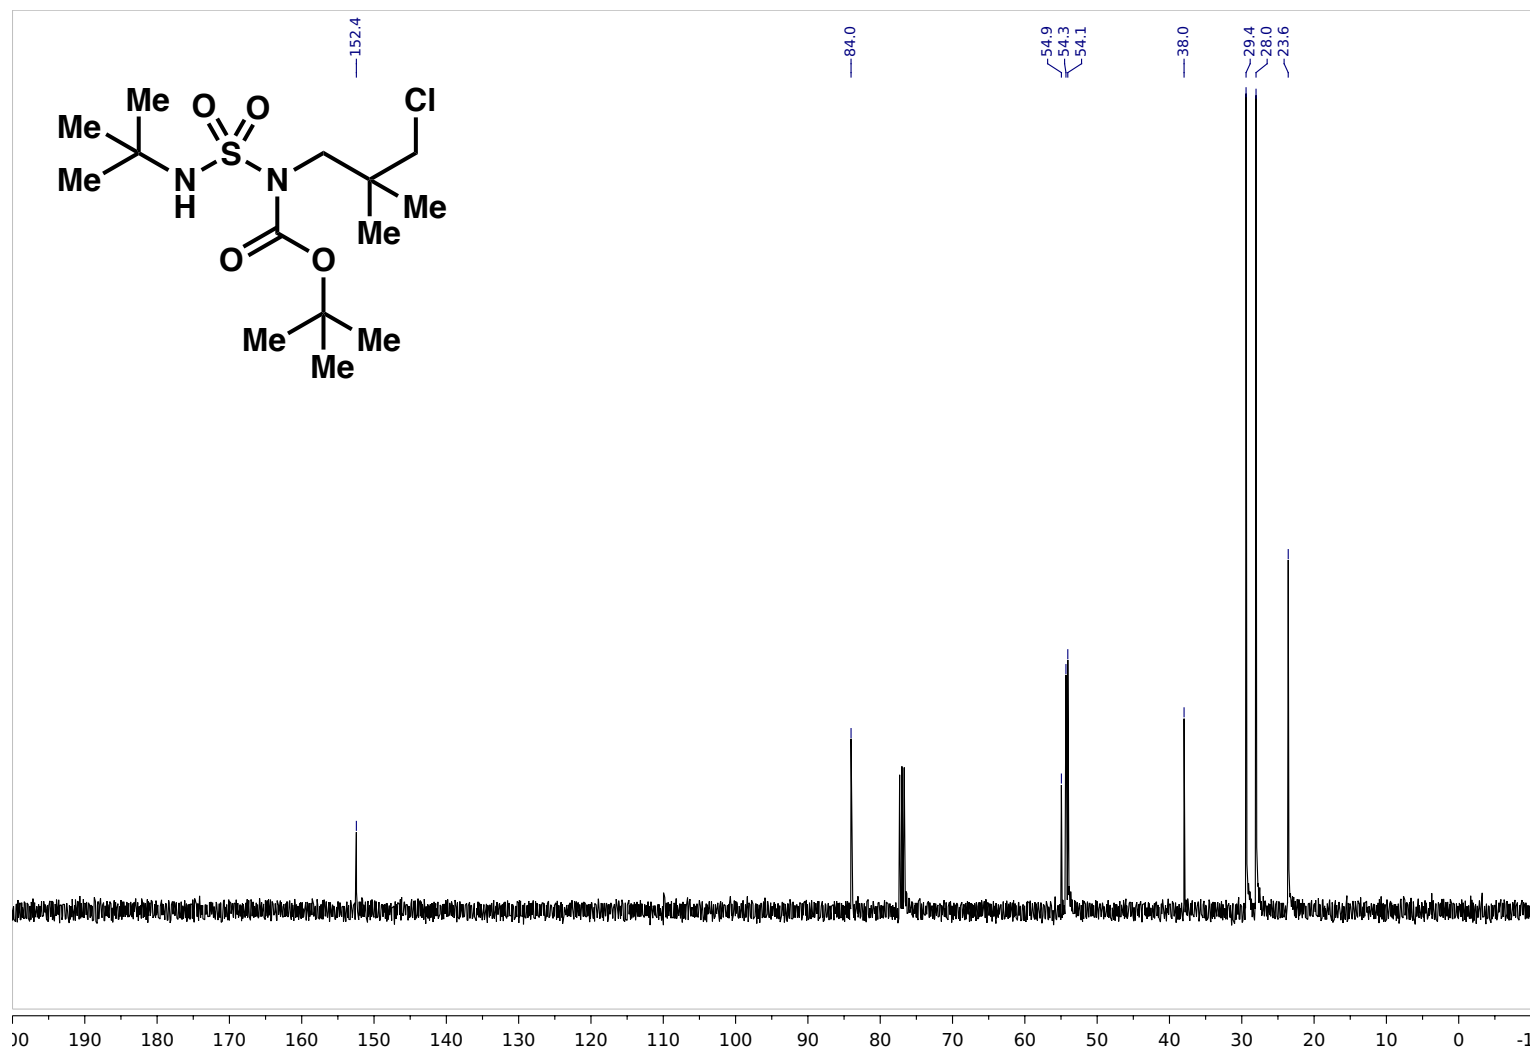

<sup>13</sup>C NMR (101 MHz, CDCl<sub>3</sub>) for *N*-*tert*-butoxycarbonyl-*N'*-*tert*-butyl-*N*-(3-chloro-2,2-dimethylprop-1-yl)sulfamide (**4a**)

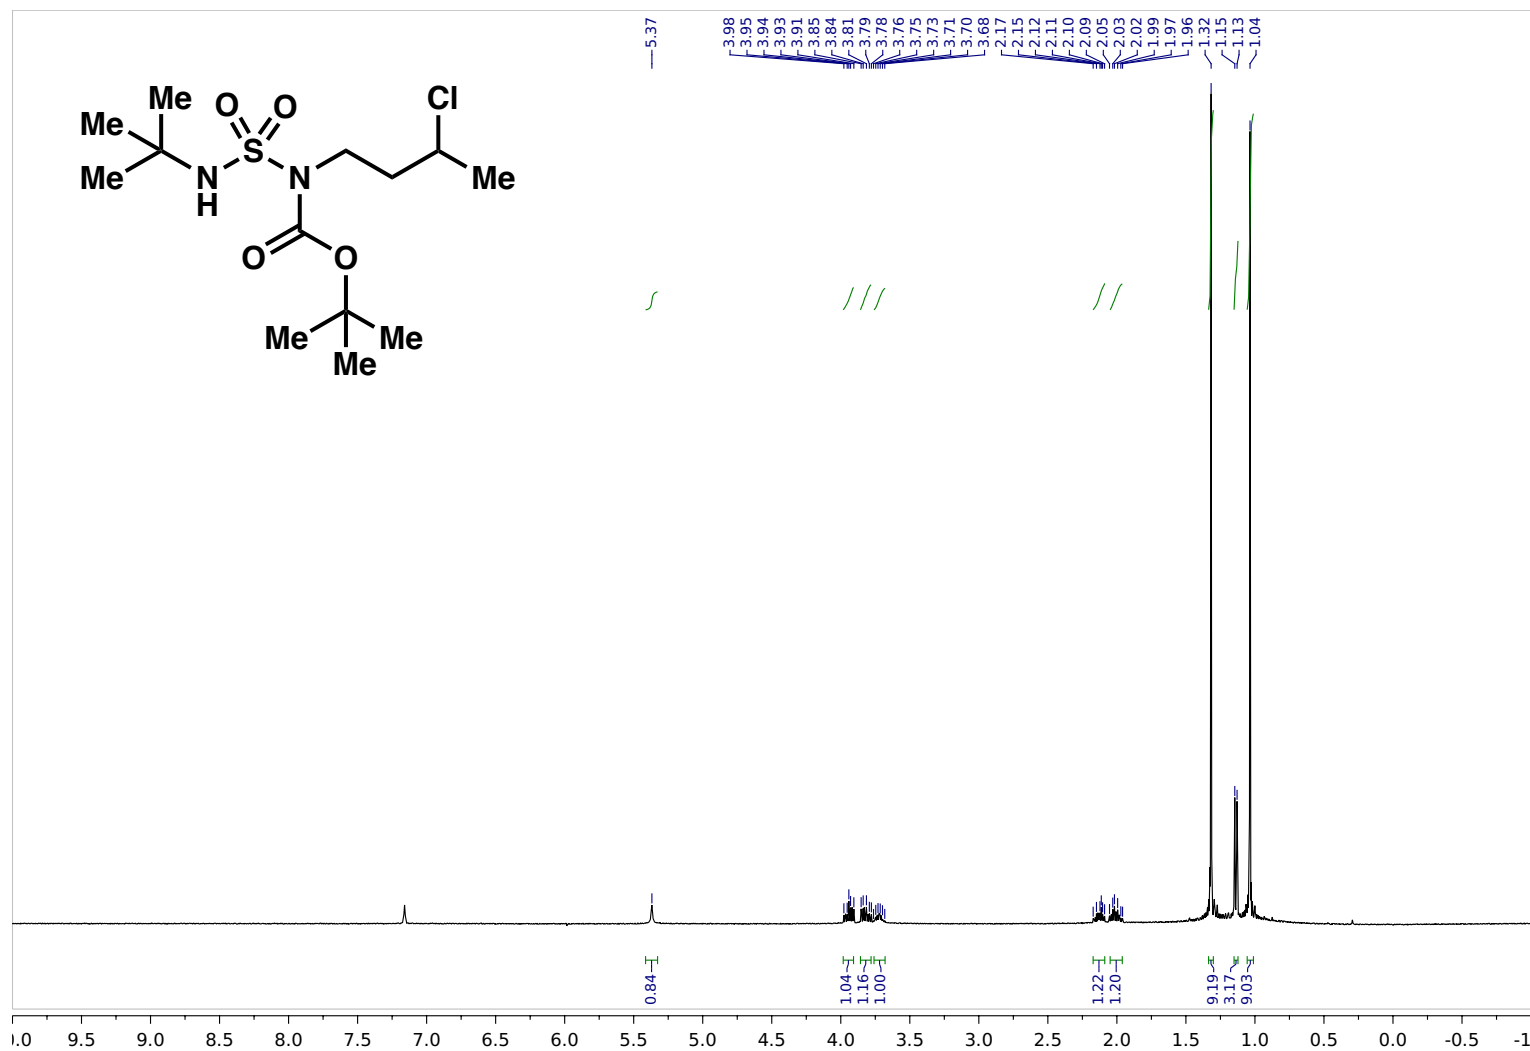

<sup>1</sup>H NMR (400 MHz, C<sub>6</sub>D<sub>6</sub>) for *N*-*tert*-butoxycarbonyl-*N'*-*tert*-butyl-*N*-(3-chlorobut-1-yl)sulfamide (**4b**)

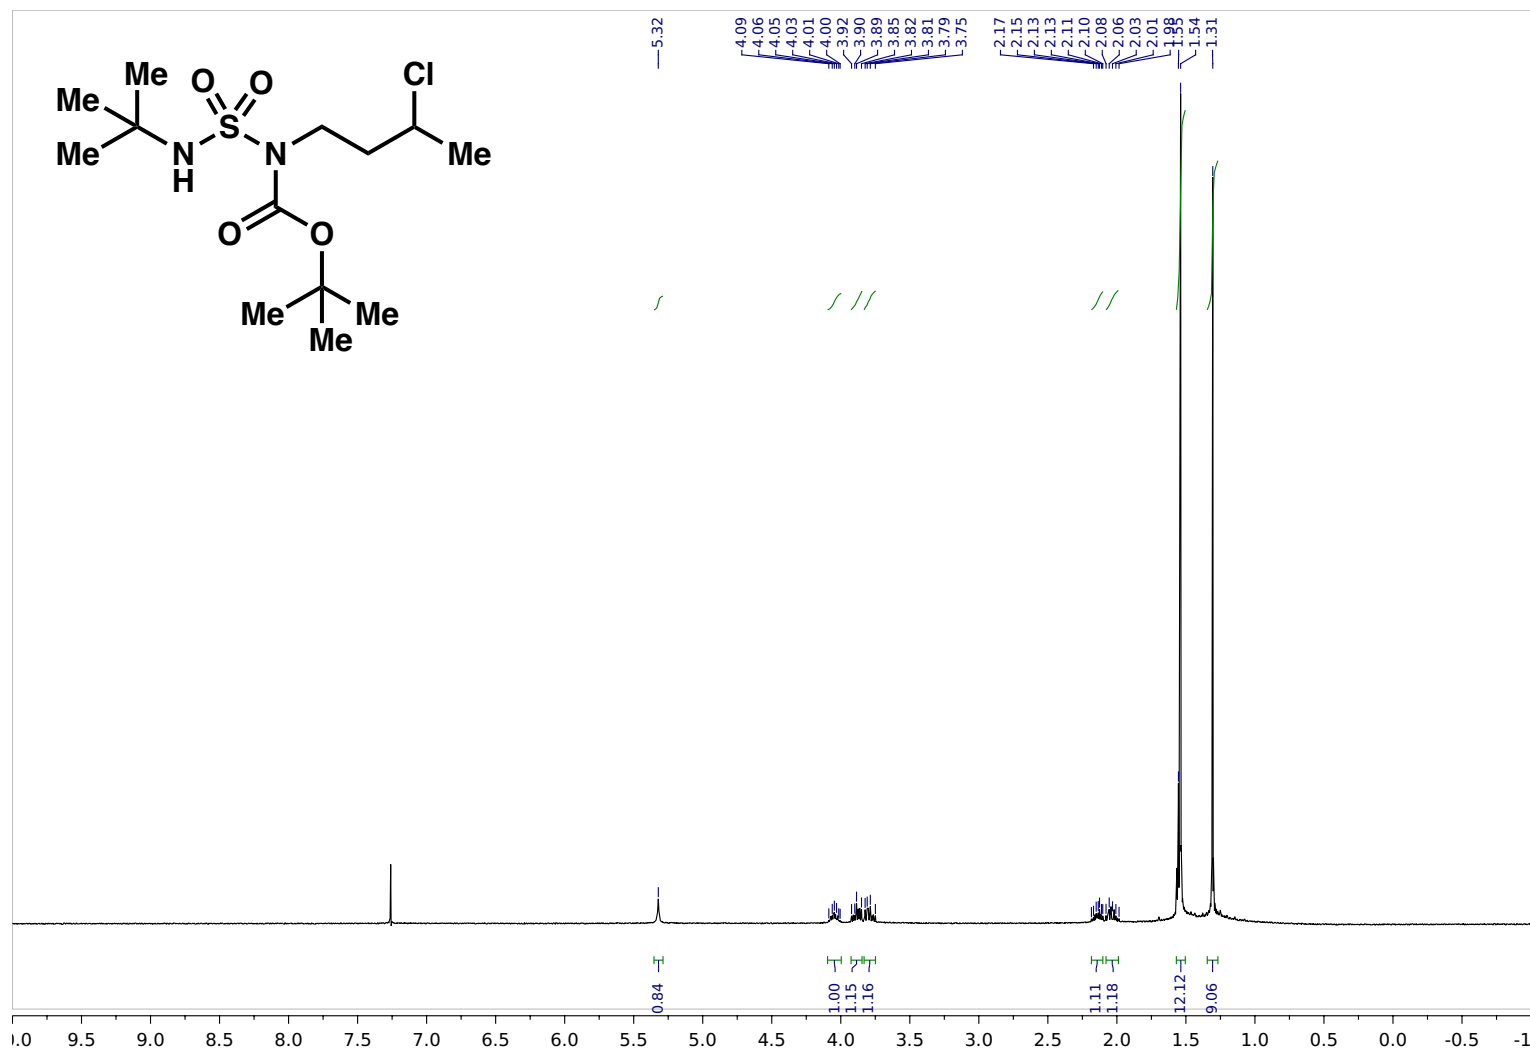

<sup>1</sup>H NMR (400 MHz, CDCl<sub>3</sub>) for *N*-*tert*-butoxycarbonyl-*N'*-*tert*-butyl-*N*-(3-chlorobut-1-yl)sulfamide (**4b**)

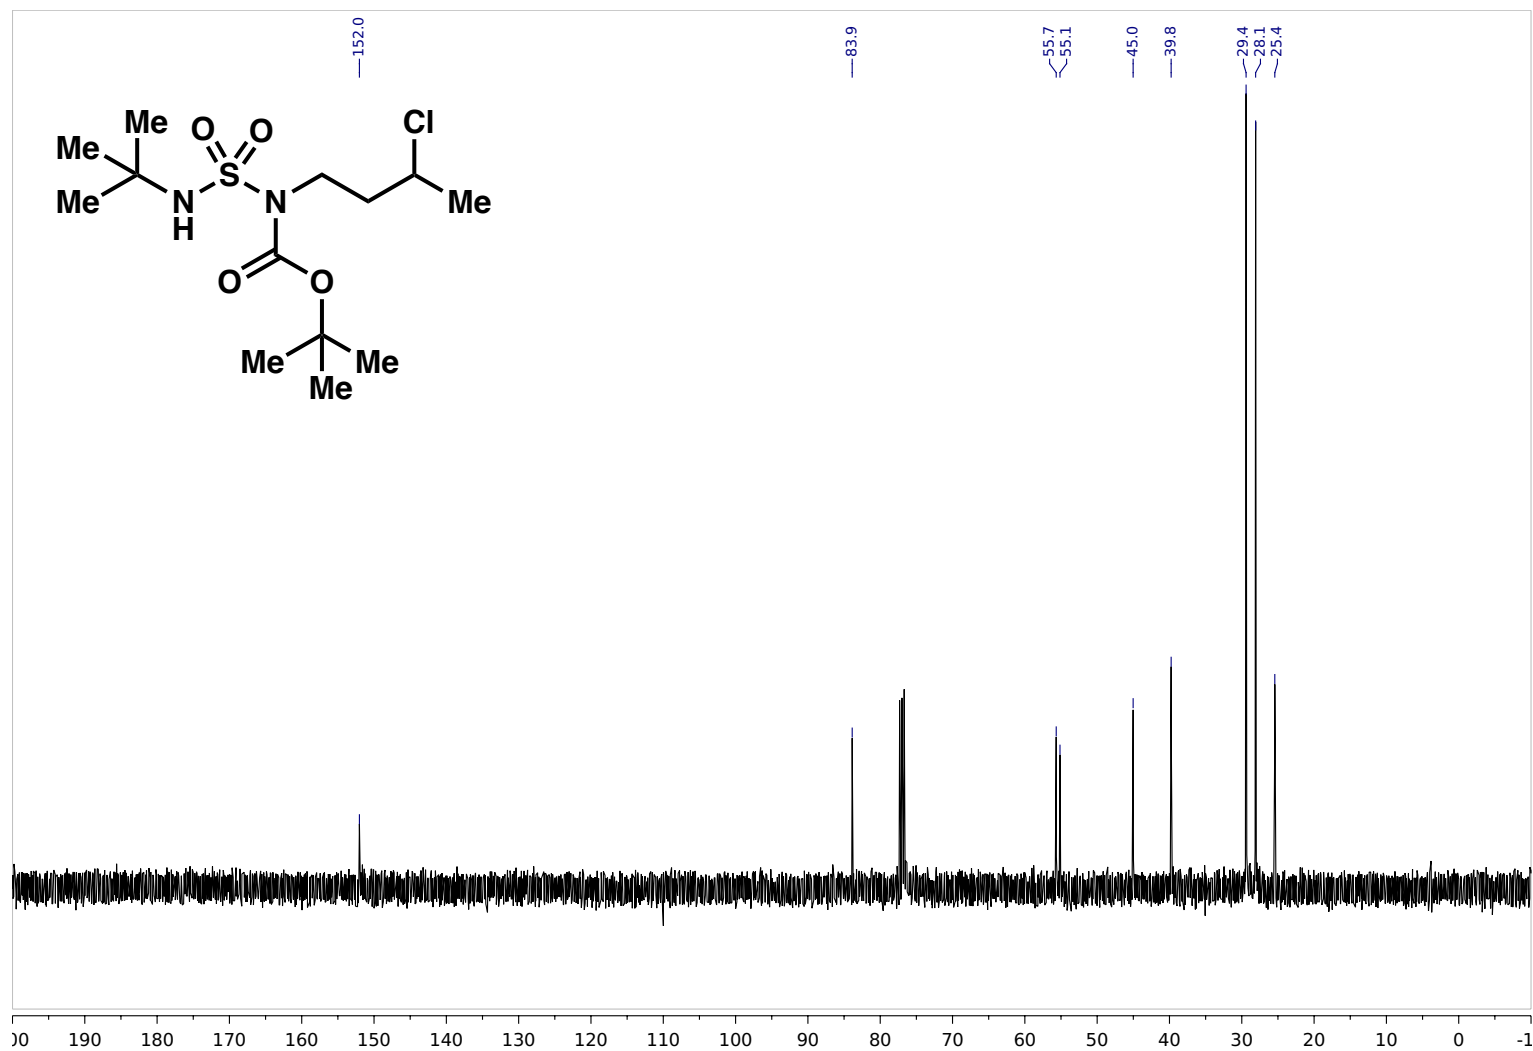

<sup>13</sup>C NMR (101 MHz, CDCl<sub>3</sub>) for *N*-*tert*-butoxycarbonyl-*N'*-*tert*-butyl-*N*-(3-chlorobut-1-yl)sulfamide (**4b**)

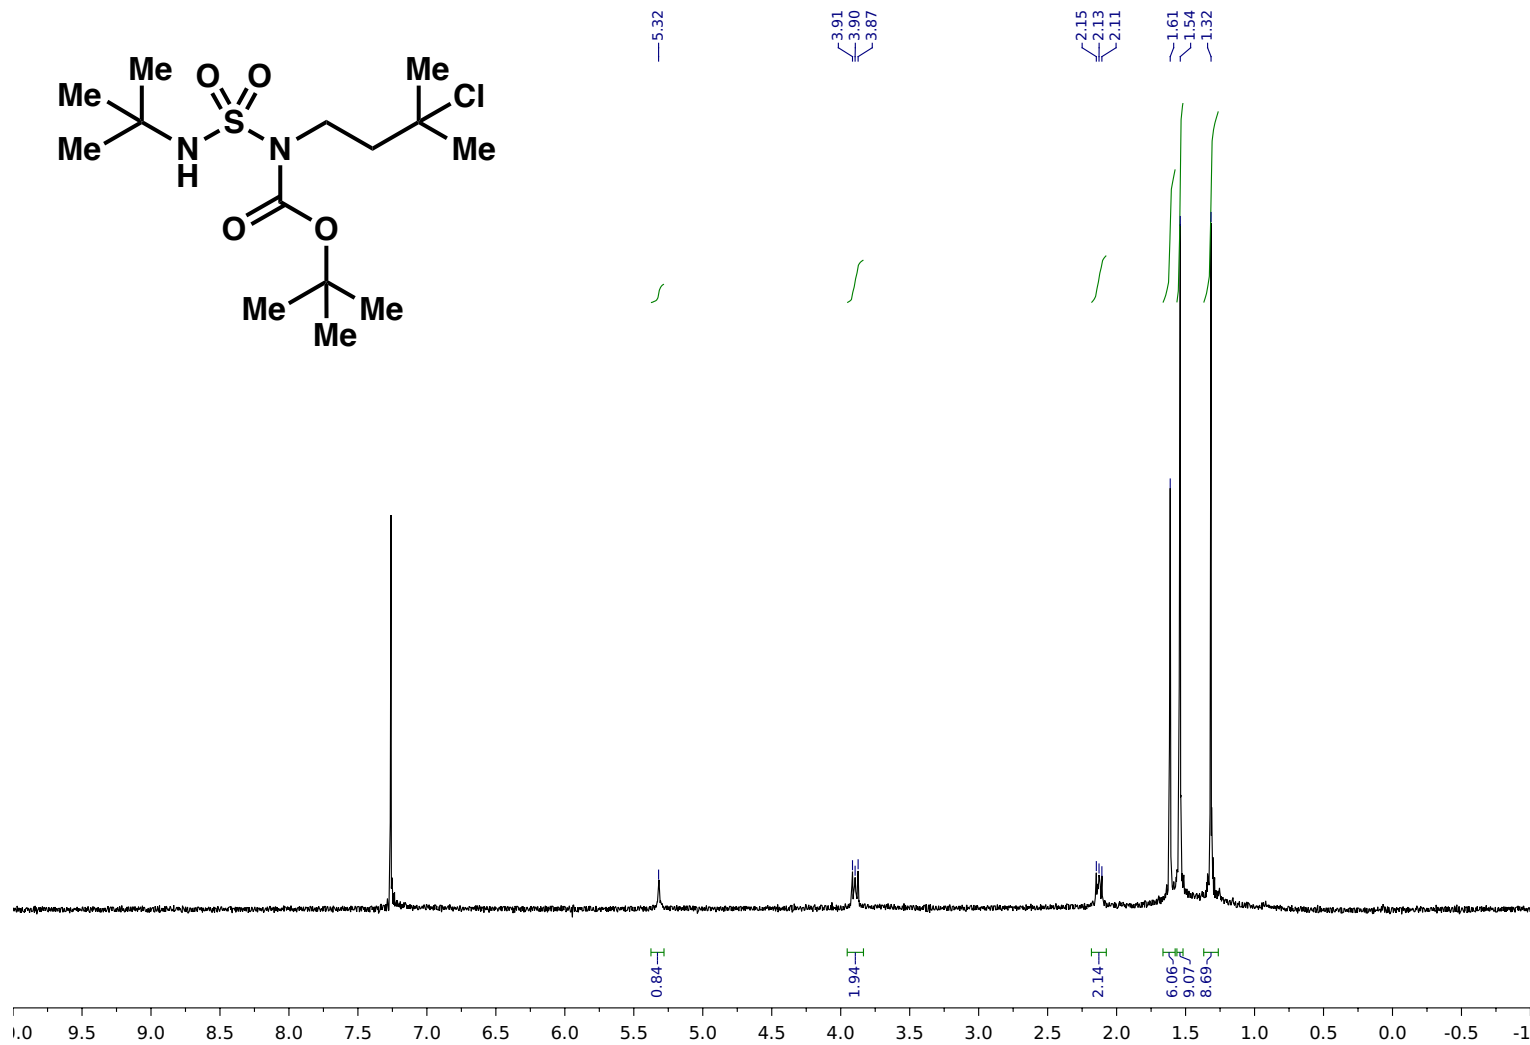

<sup>1</sup>H NMR (400 MHz, CDCl<sub>3</sub>) for *N*-*tert*-butoxycarbonyl-*N'*-*tert*-butyl-*N*-(3-chloro-3-methylbut-1-yl)sulfamide (4c)

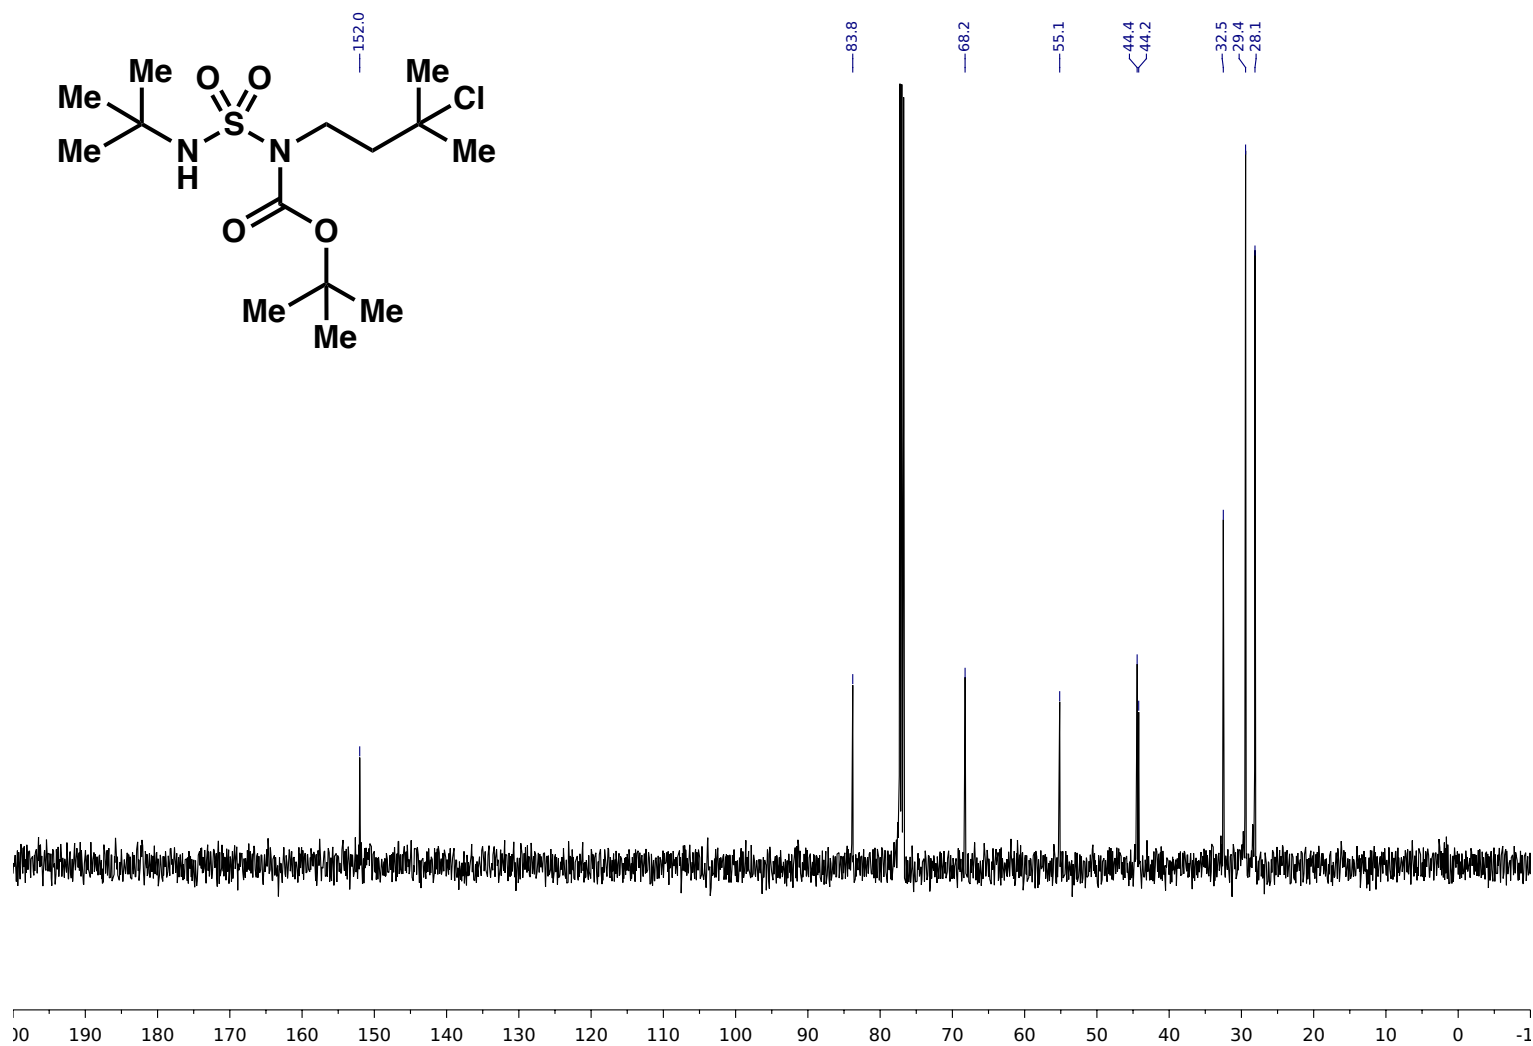

$^{13}\text{C}$  NMR (126 MHz,  $\text{CDCl}_3$ ) for *N*-*tert*-butoxycarbonyl-*N'*-*tert*-butyl-*N*-(3-chloro-3-methylbut-1-yl)sulfamide (4c)



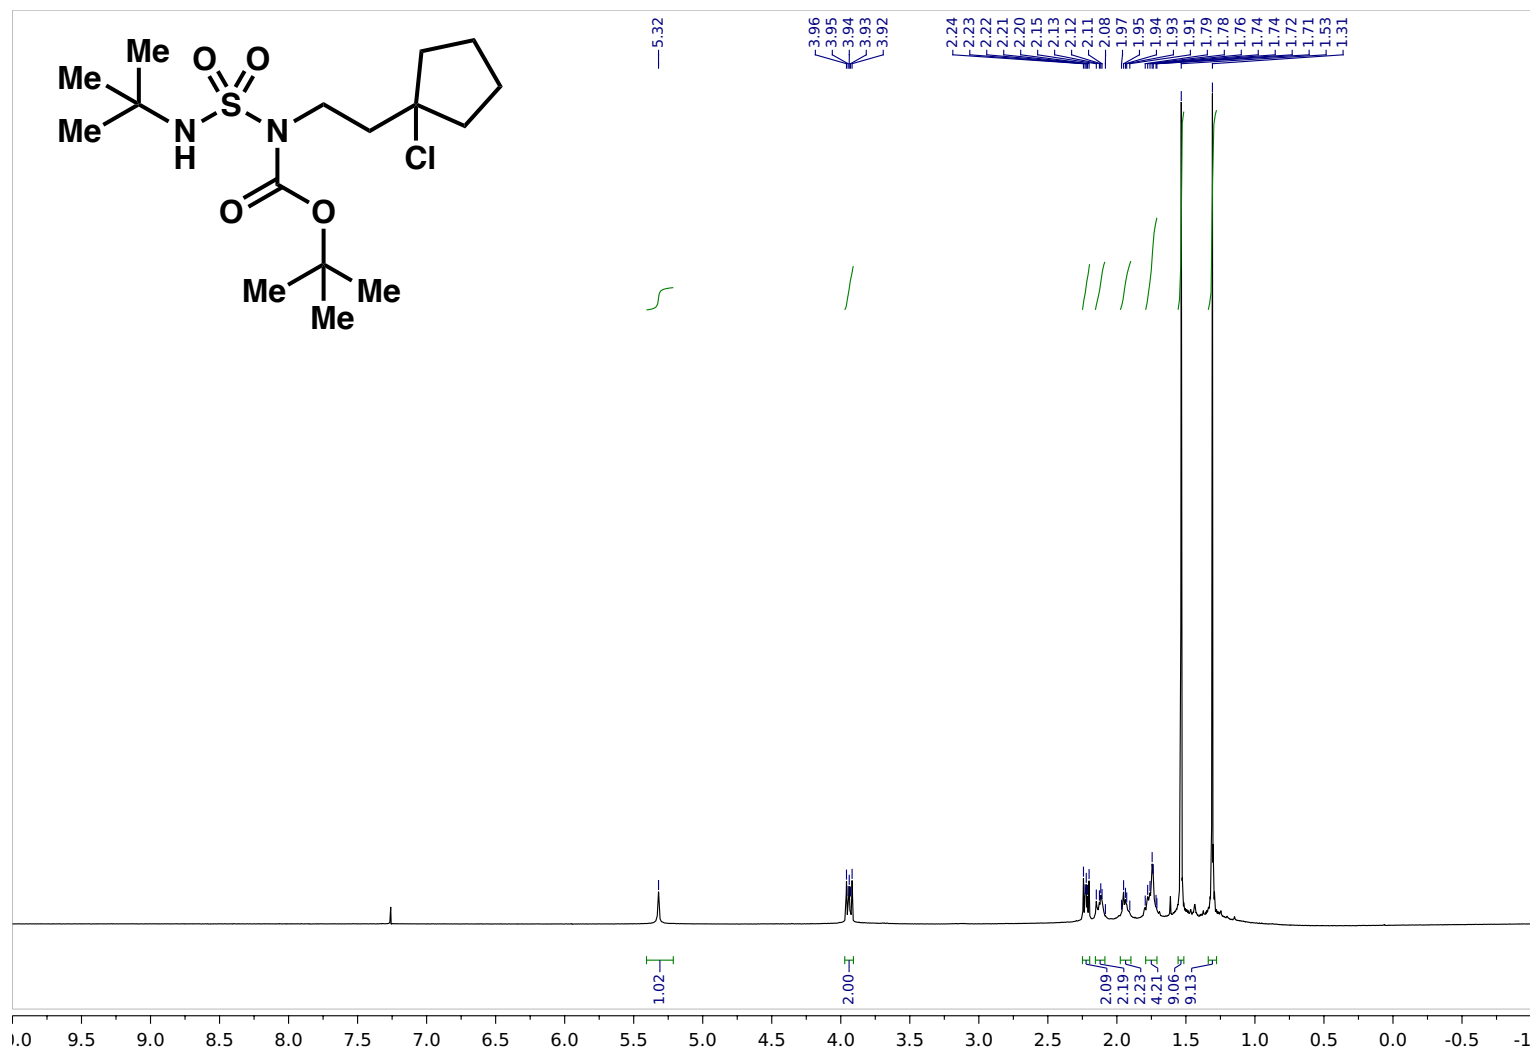

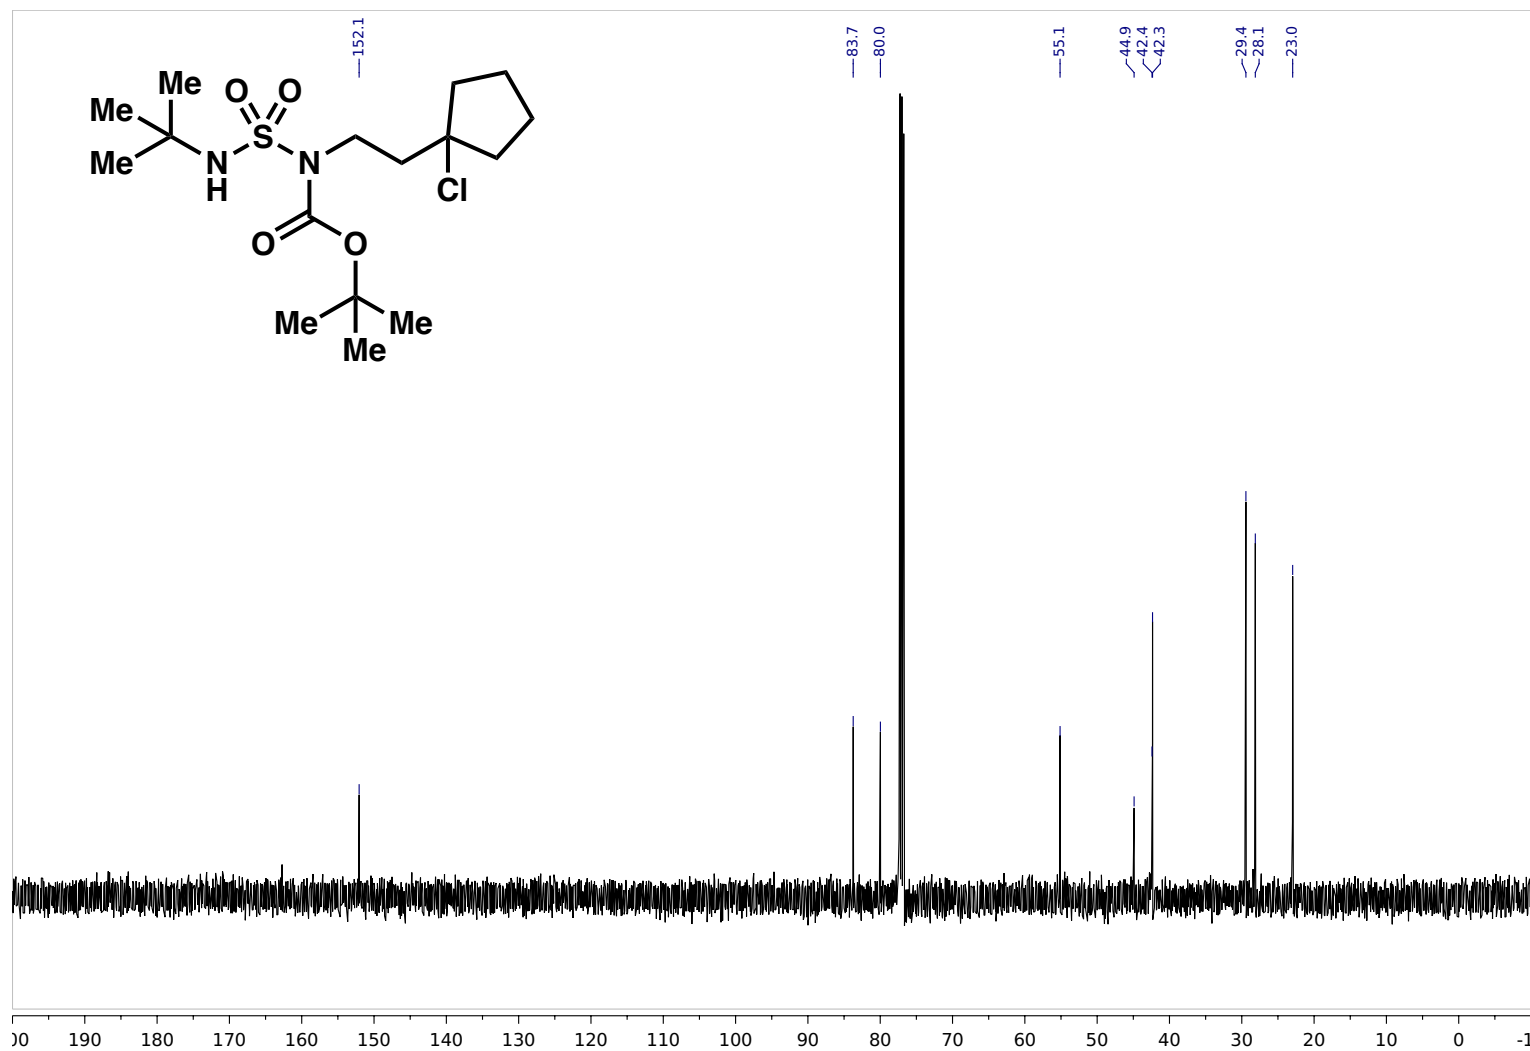

<sup>13</sup>C NMR (126 MHz, CDCl<sub>3</sub>) for *N*-tert-butoxycarbonyl-*N'*-tert-butyl-*N*-(2-(1-chlorocyclopent-1-yl)ethyl)sulfamide (**4d**)

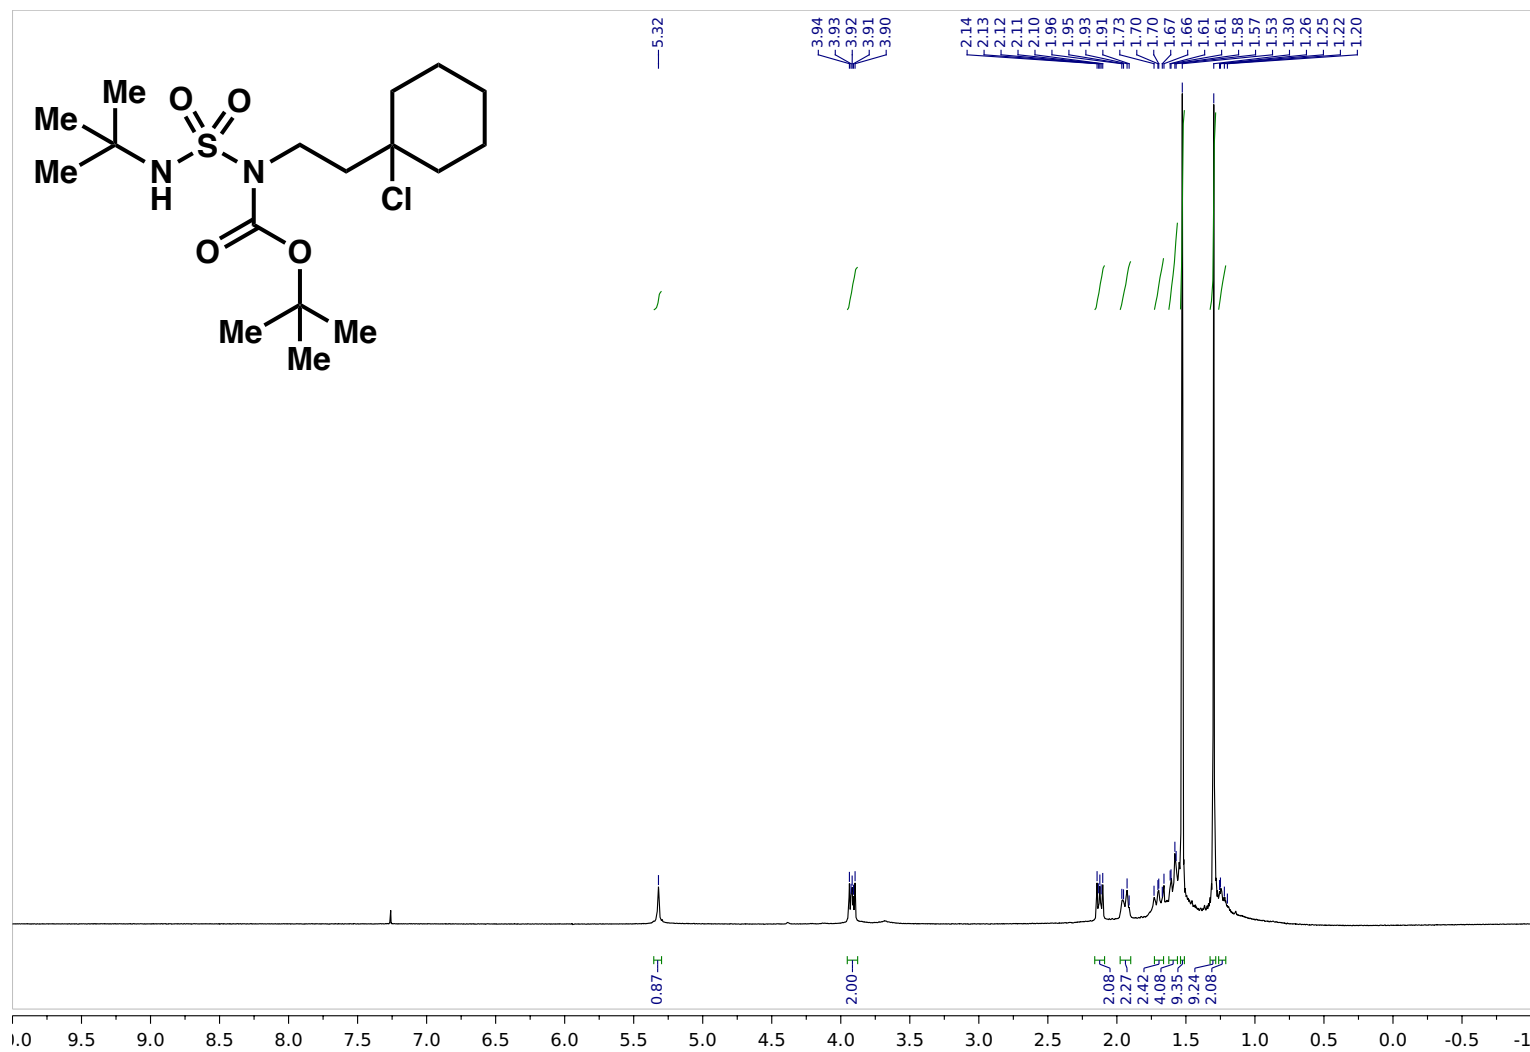

<sup>1</sup>H NMR (400 MHz, CDCl<sub>3</sub>) for *N*-*tert*-butoxycarbonyl-*N'*-*tert*-butyl-*N*-(2-(1-chlorocyclohex-1-yl)ethyl)sulfamide (**4e**)

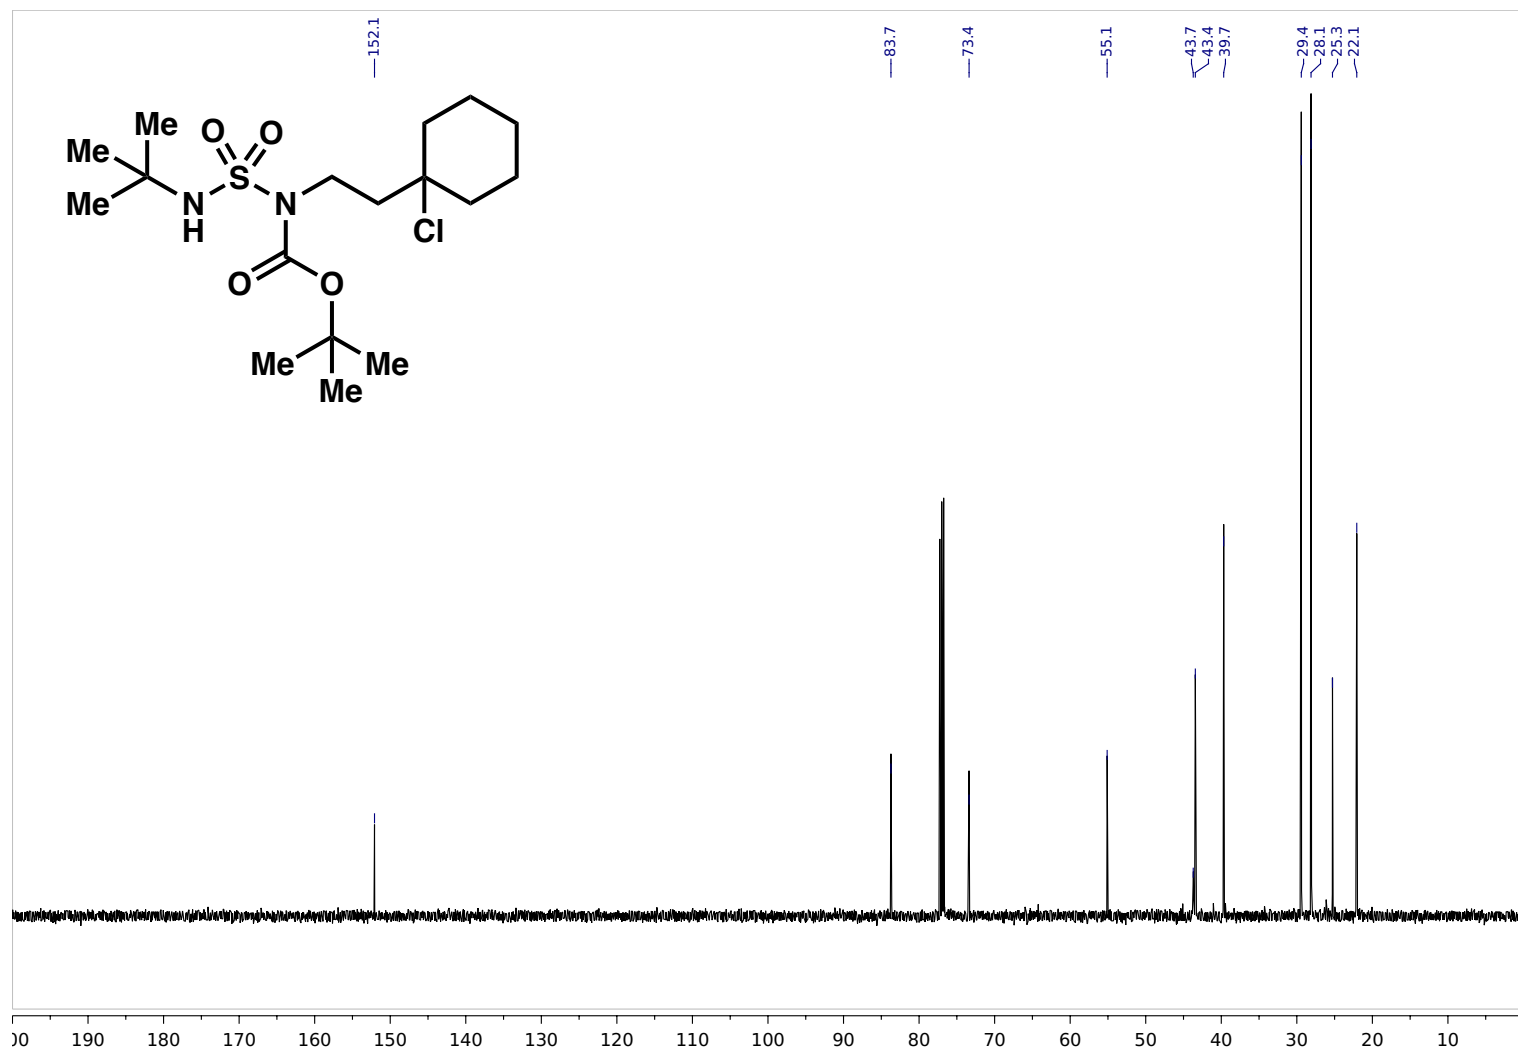

<sup>13</sup>C NMR (126 MHz, CDCl<sub>3</sub>) for *N*-*tert*-butoxycarbonyl-*N'*-*tert*-butyl-*N*-(2-(1-chlorocyclohex-1-yl)ethyl)sulfamide (4e)

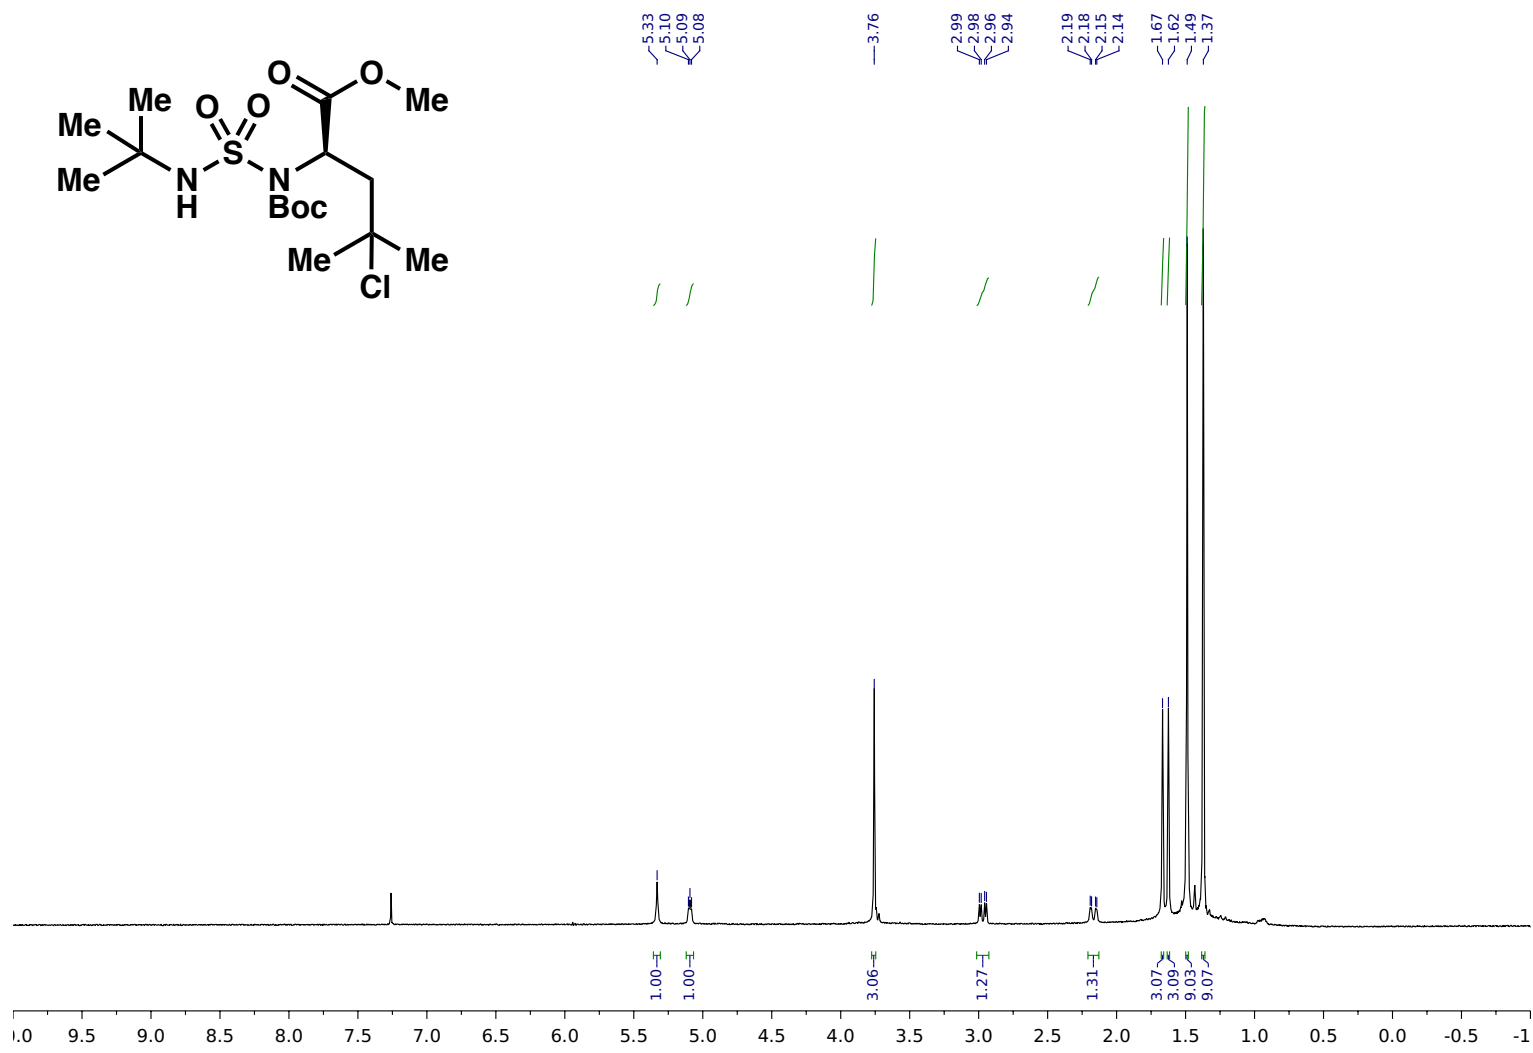

<sup>1</sup>H NMR (400 MHz, CDCl<sub>3</sub>) for *N*-*tert*-butoxycarbonyl-*N'*-*tert*-butyl-*N*-((2*R*)-methyl 4-chloro-4-methylpentano-2-yl)sulfamide (**4f**)

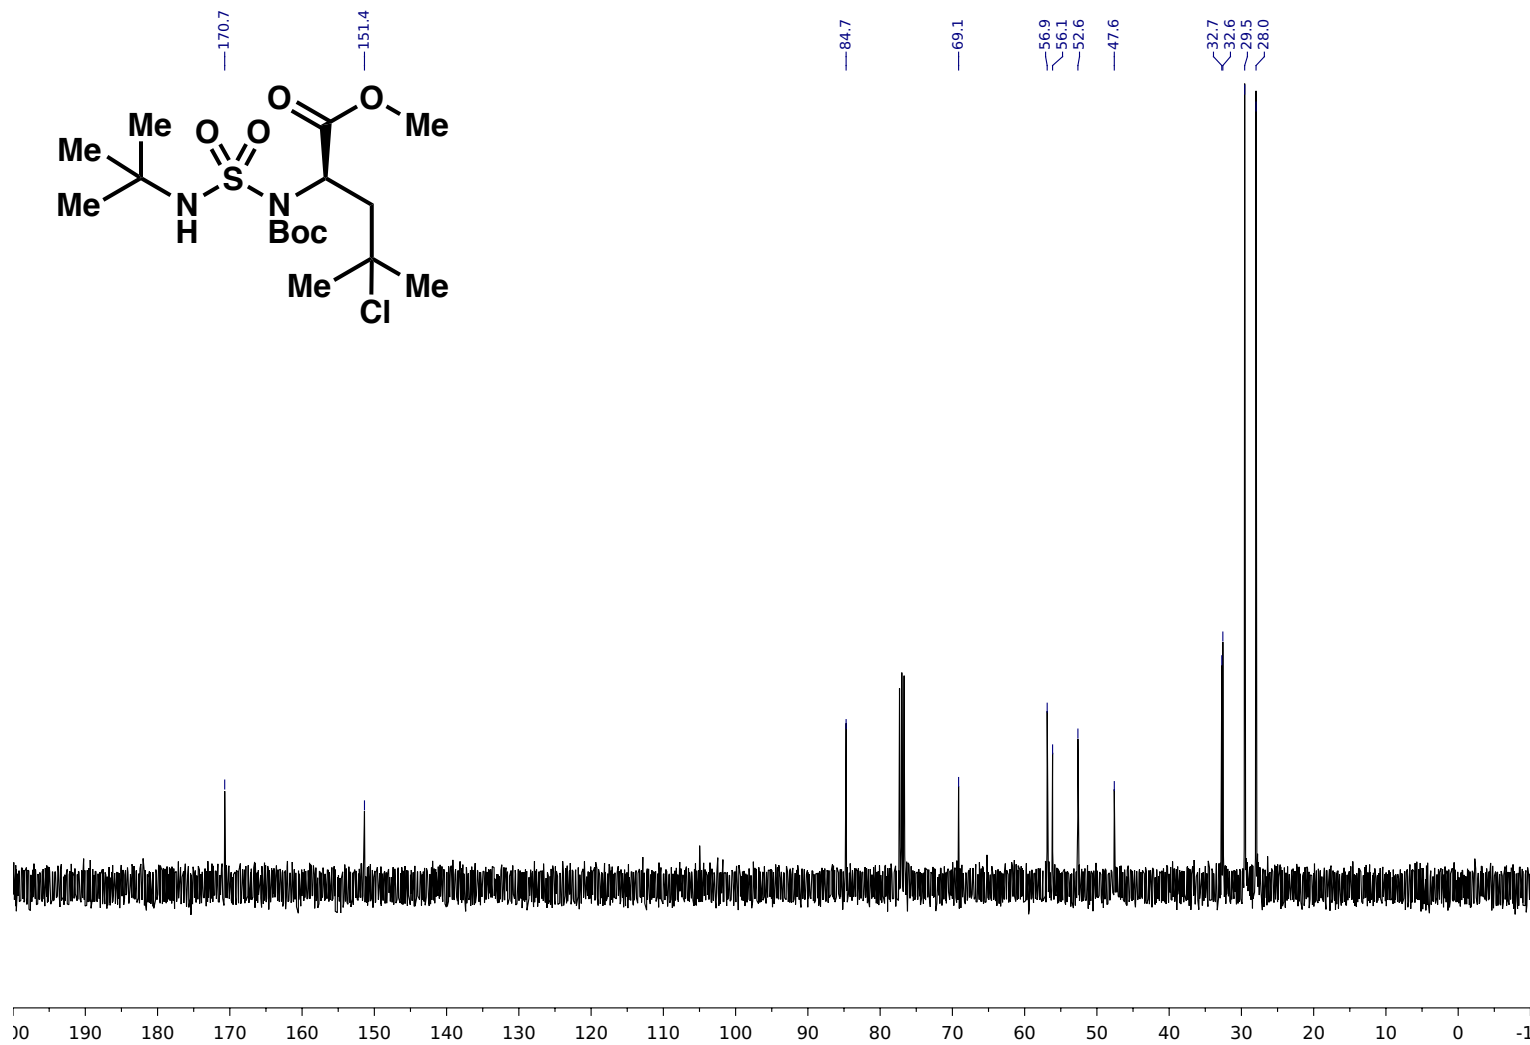

<sup>13</sup>C NMR (101 MHz, CDCl<sub>3</sub>) for *N*-*tert*-butoxycarbonyl-*N'*-*tert*-butyl-*N*-((2*R*)-methyl 4-chloro-4-methylpentano-2-yl)sulfamide (**4f**)

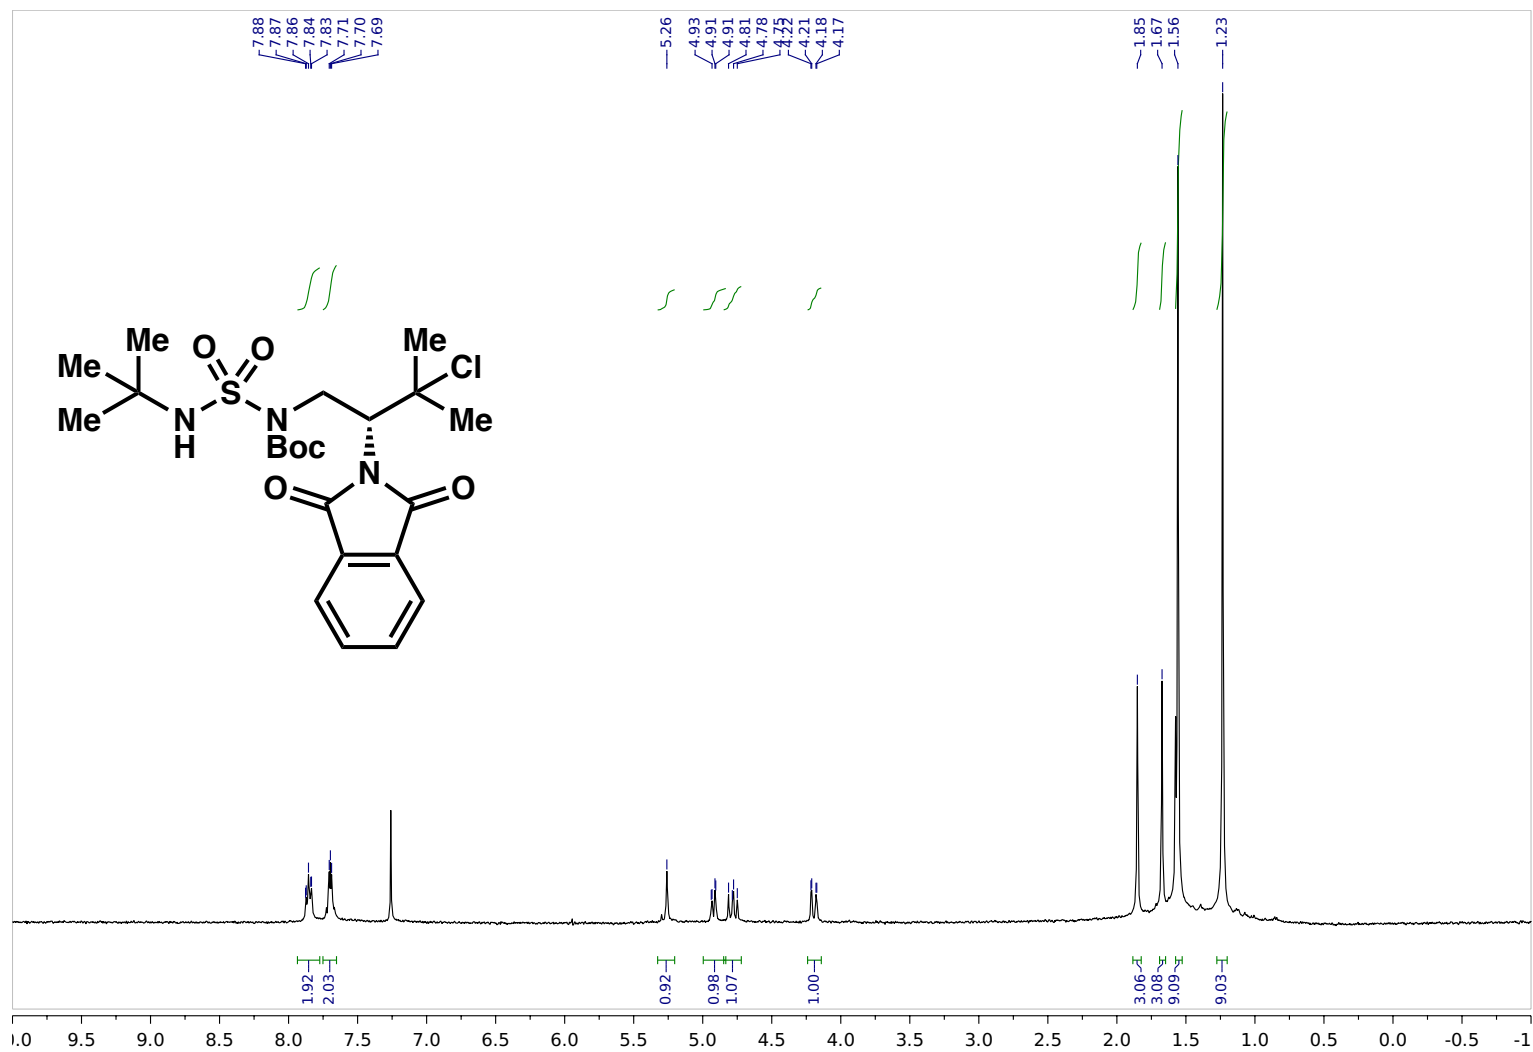

<sup>1</sup>H NMR (400 MHz, CDCl<sub>3</sub>) for *N*-tert-butoxycarbonyl-*N'*-tert-butyl-*N*-((*S*)-2-(1,3-dioxisoindolin-2-yl)-3-chloro-3-methylbutyl)sulfamide (**4g**)

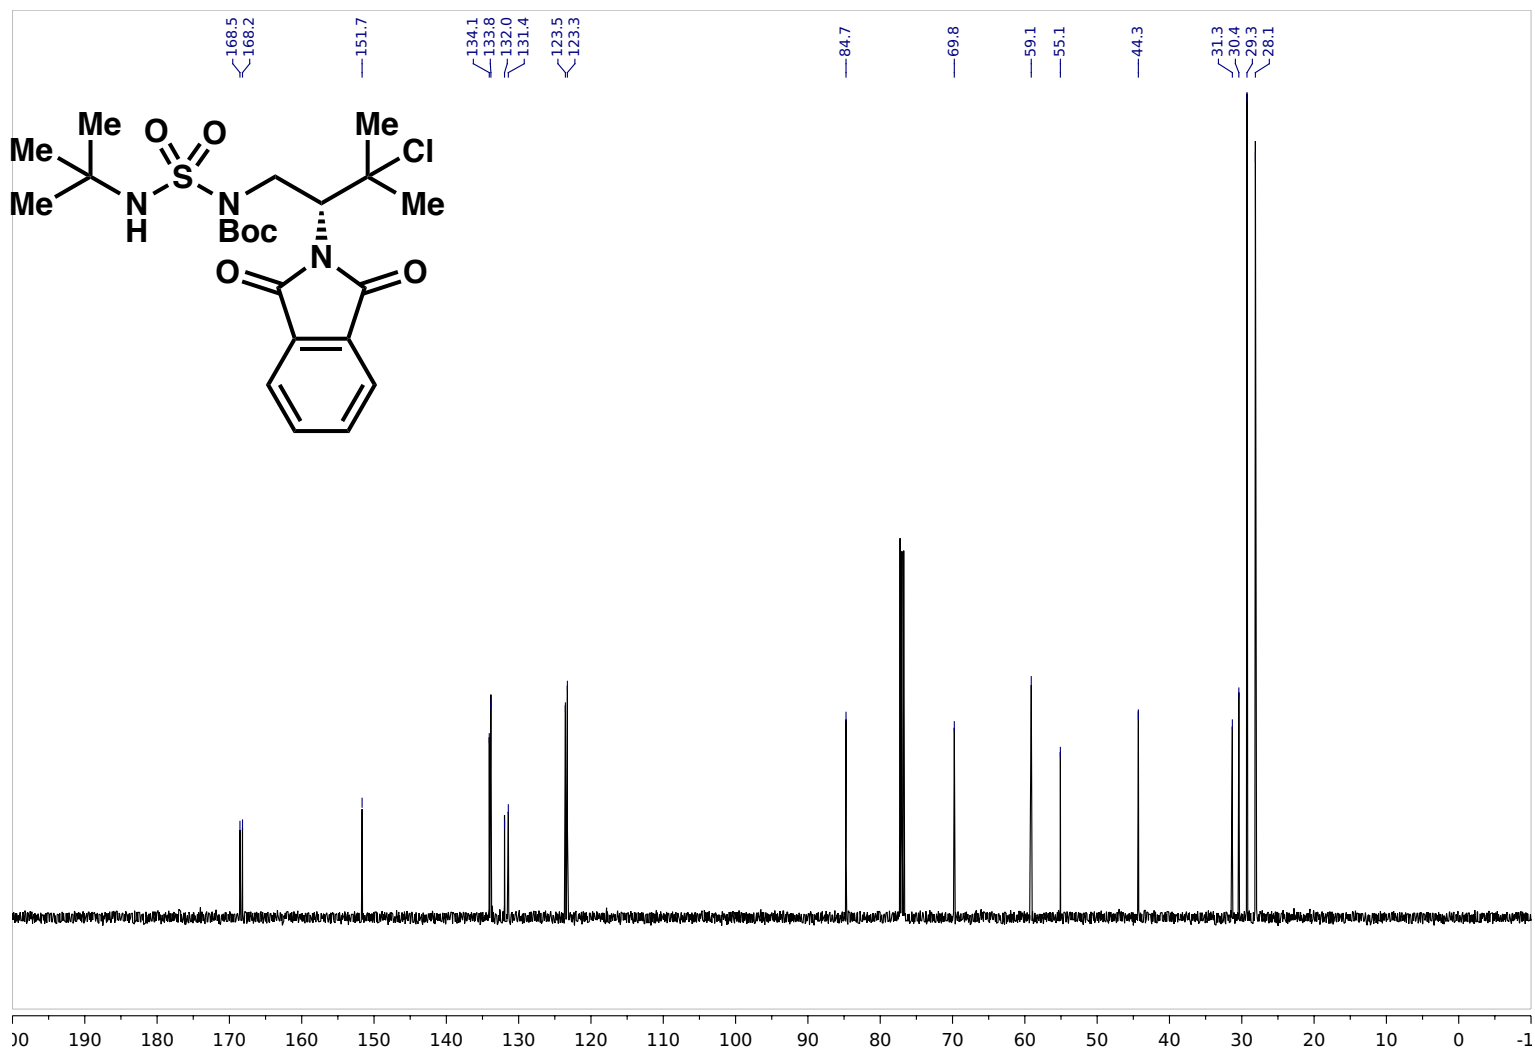

<sup>13</sup>C NMR (126 MHz, CDCl<sub>3</sub>) for *N*-*tert*-butoxycarbonyl-*N'*-*tert*-butyl-*N*-((*S*)-2-(1,3-dioxisoindolin-2-yl)-3-chloro-3-methylbutyl)sulfamide (**4g**)



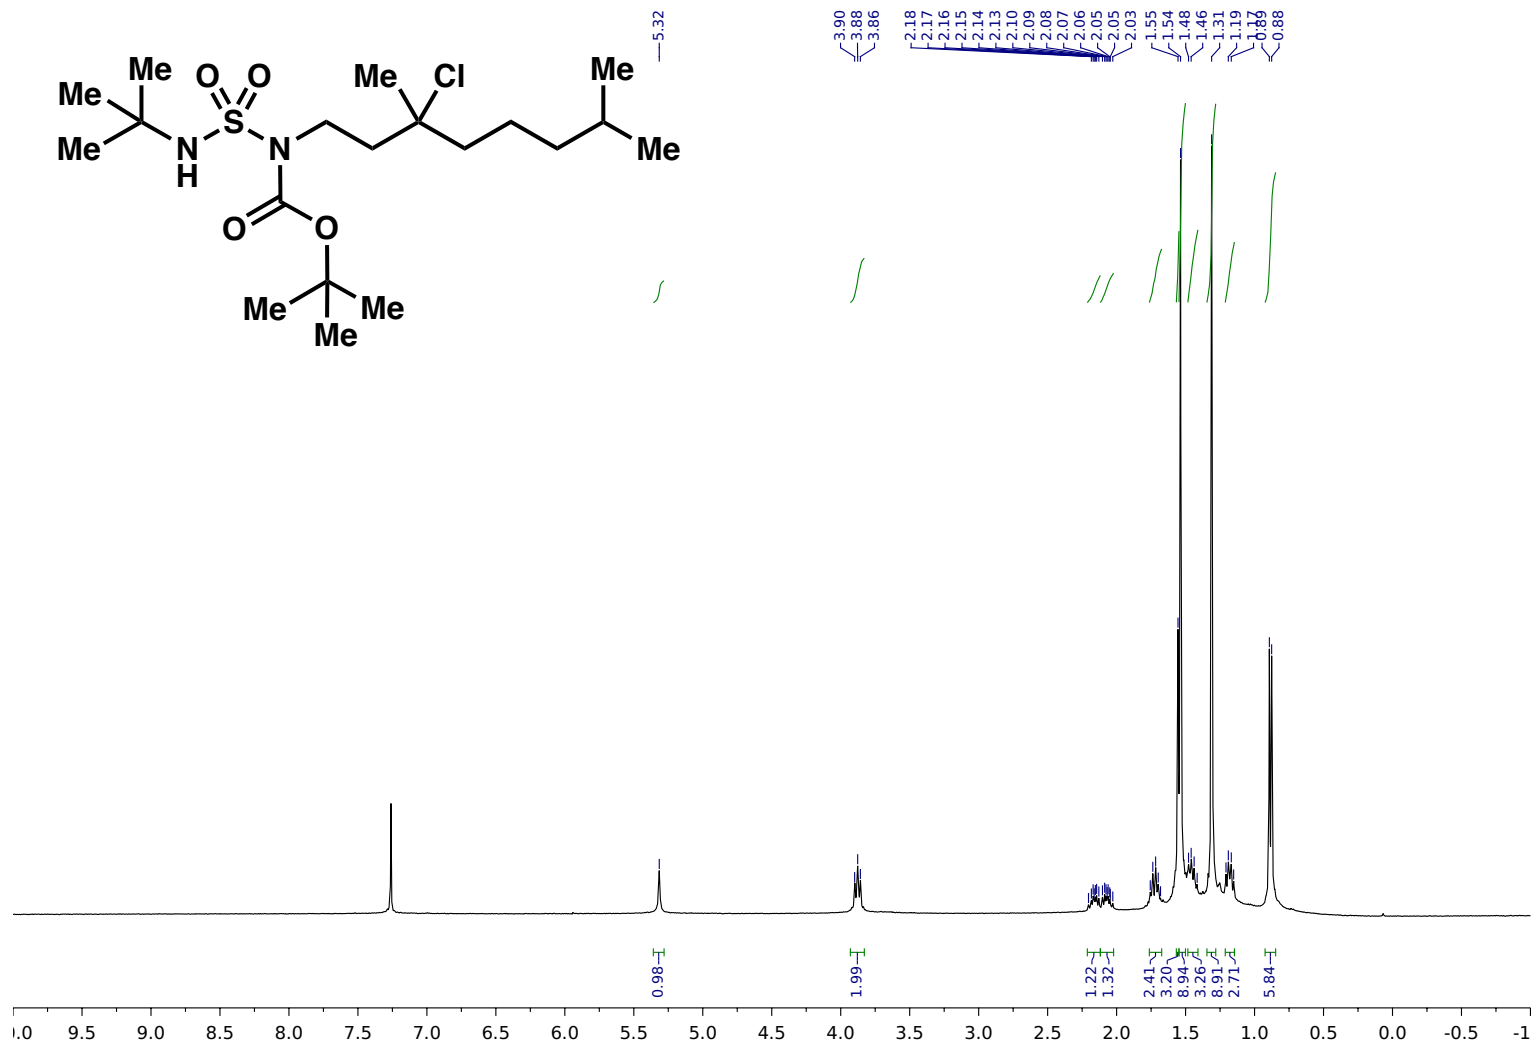

<sup>1</sup>H NMR (400 MHz, CDCl<sub>3</sub>) for *N*-*tert*-butoxycarbonyl-*N'*-*tert*-butyl-*N*-(3-chloro-3,7-dimethyloct-1-yl)sulfamide (**4h**)

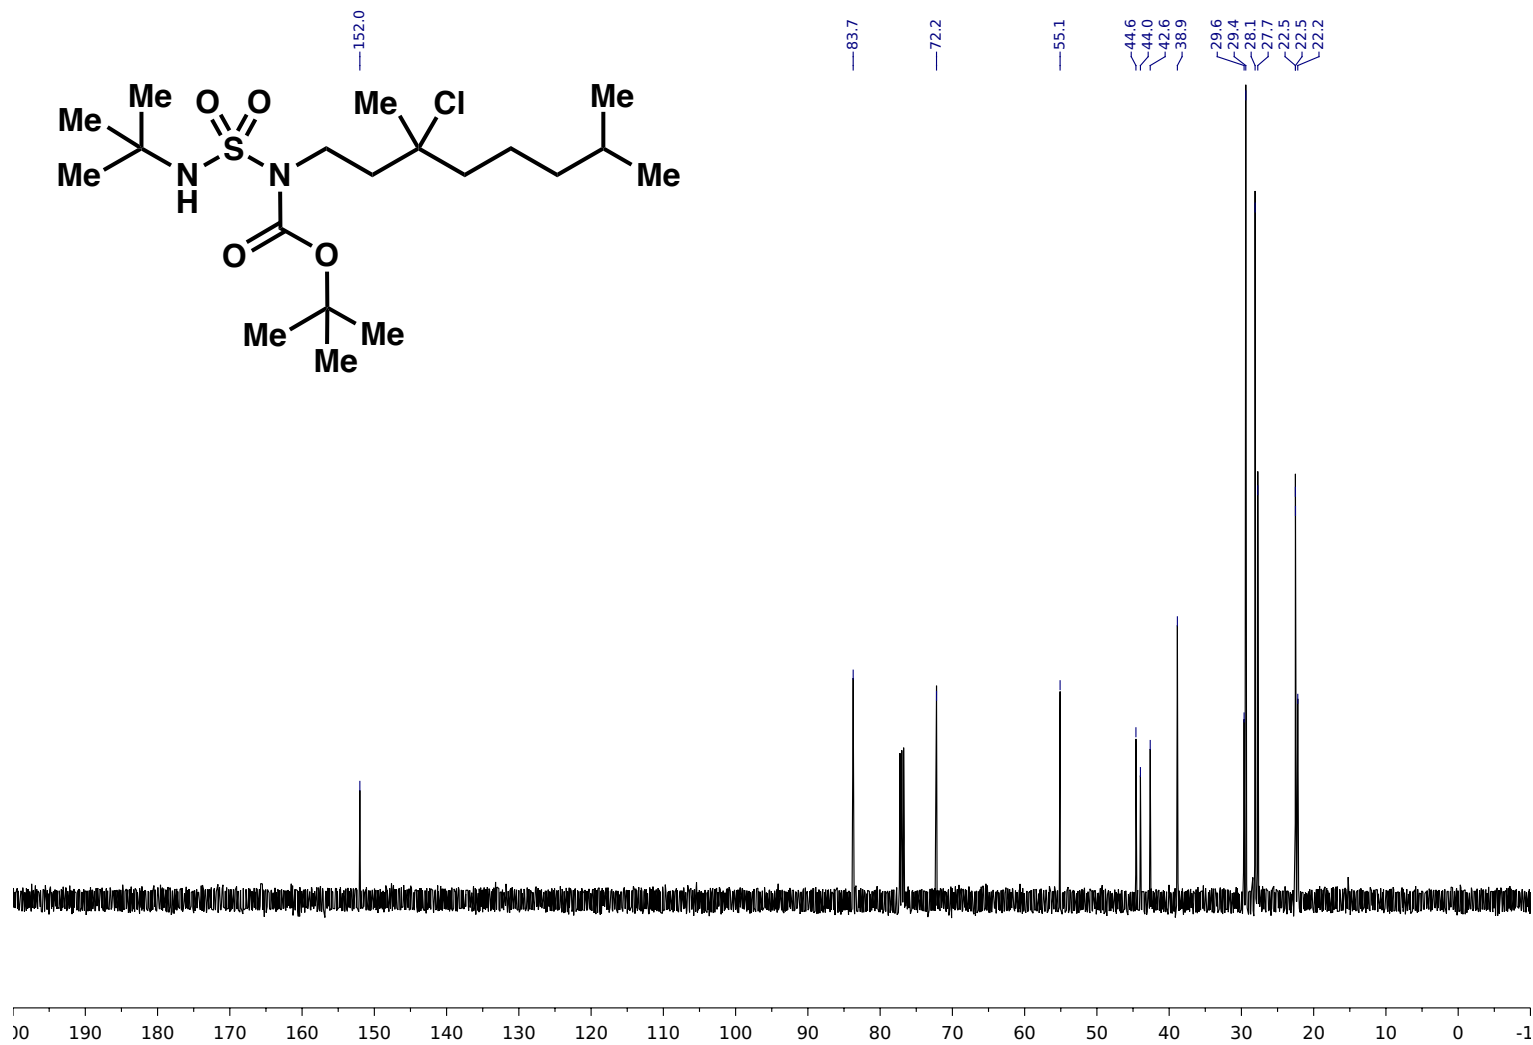

<sup>13</sup>C NMR (126 MHz, CDCl<sub>3</sub>) for *N*-*tert*-butoxycarbonyl-*N'*-*tert*-butyl-*N*-(3-chloro-3,7-dimethyloct-1-yl)sulfamide (**4h**)

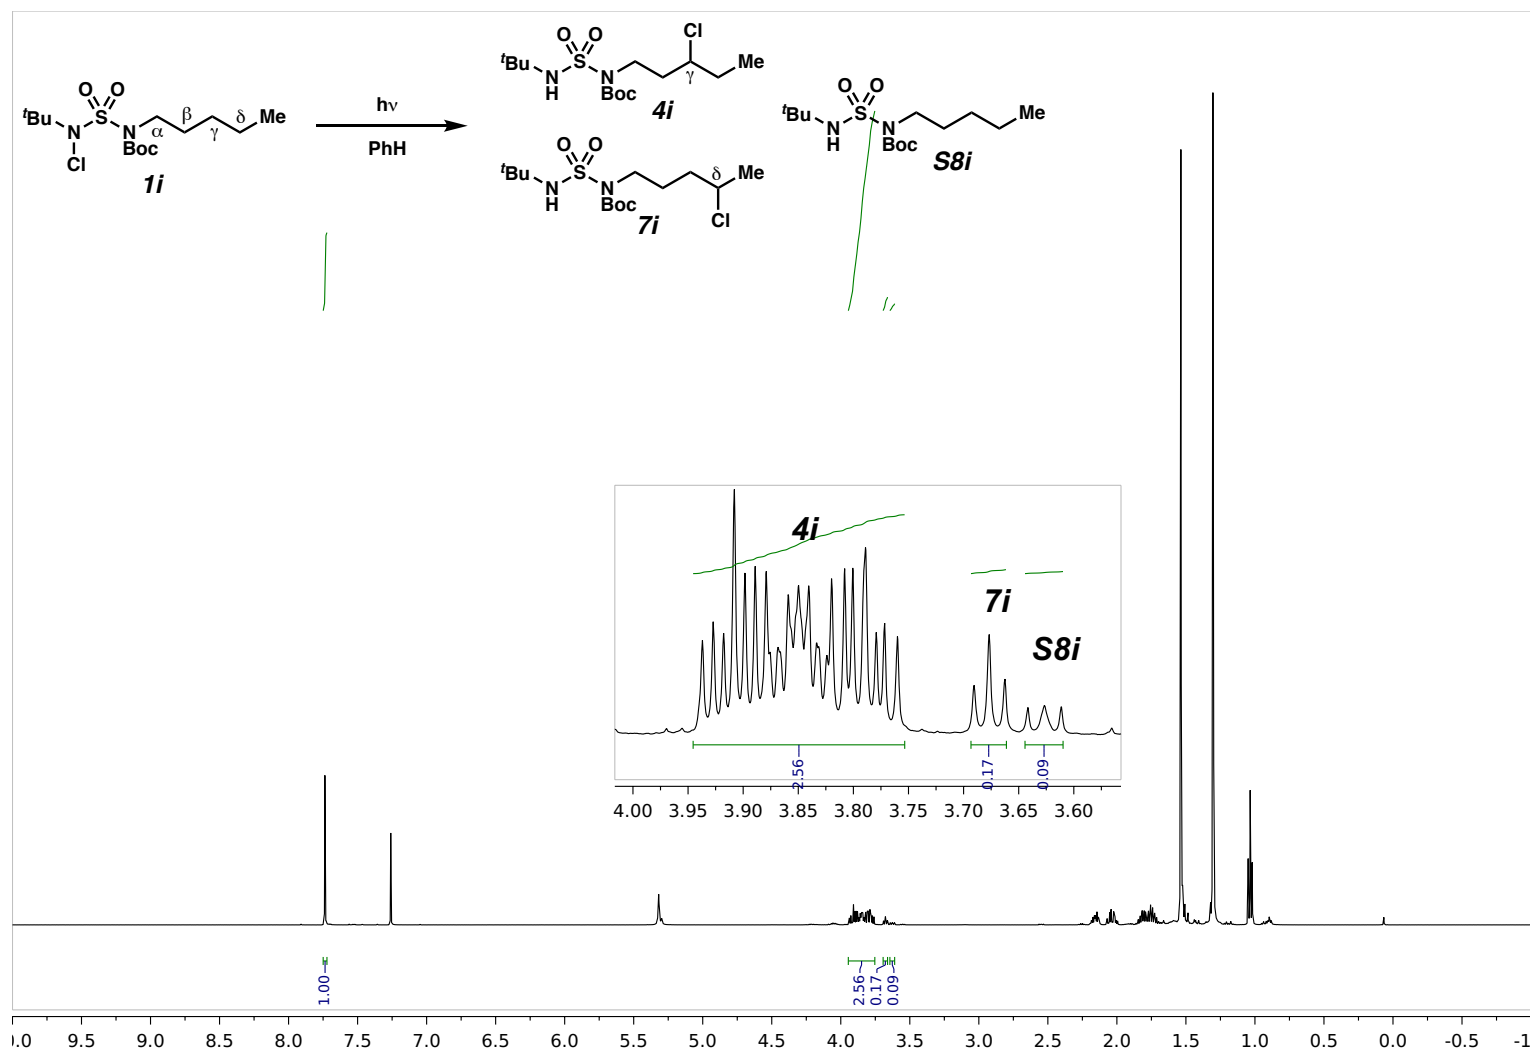

Crude  $^1\text{H}$  NMR (500 MHz,  $\text{CDCl}_3$ , 25s relaxation delay) for chlorine-transfer reaction of *N*-chlorosulfamide **1i**

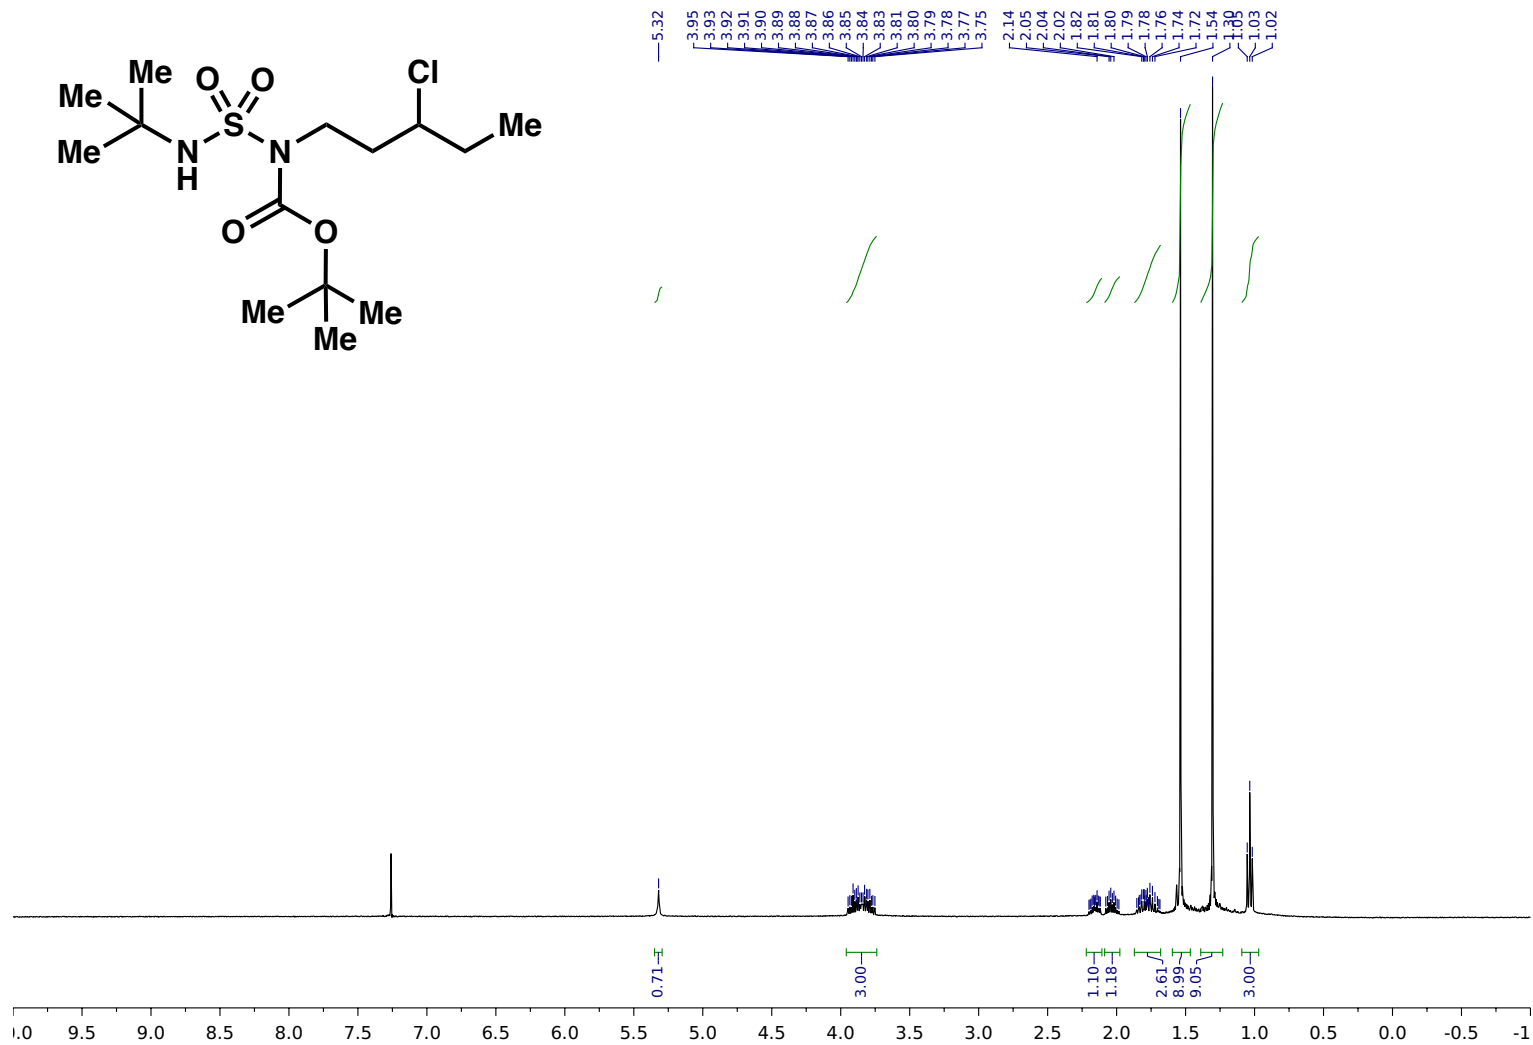

<sup>1</sup>H NMR (400 MHz, CDCl<sub>3</sub>) for *N-tert-butoxycarbonyl-N'-tert-butyl-N-(3-chloropent-1-yl)sulfamide (4i)*

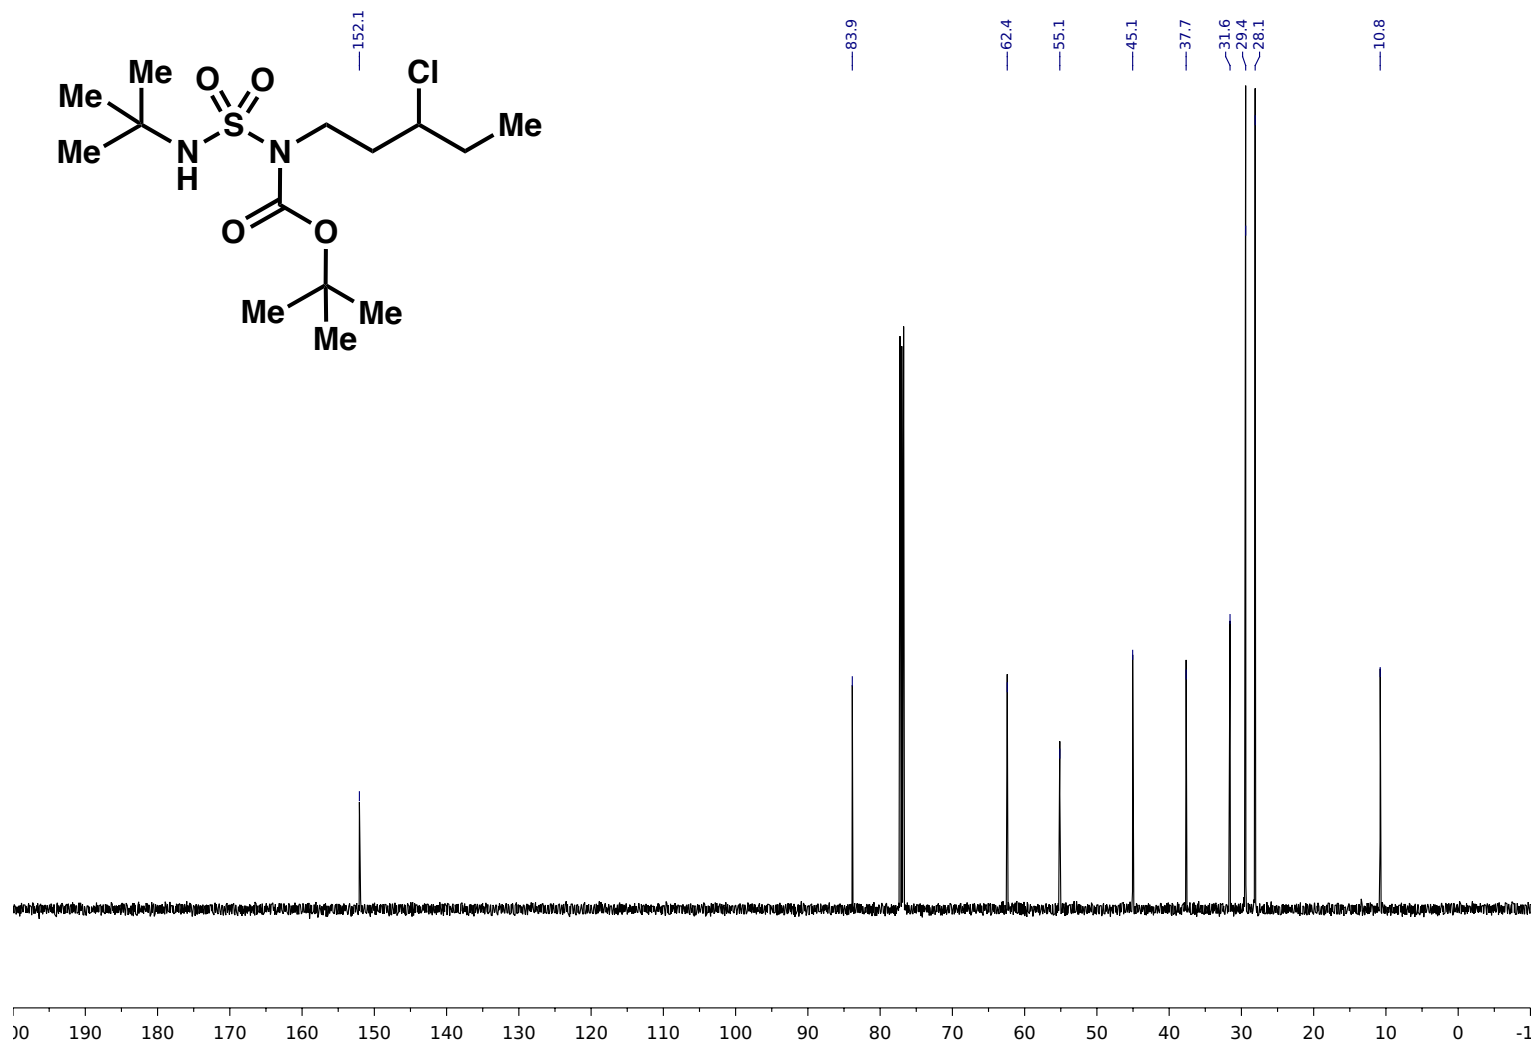

$^{13}\text{C}$  NMR (126 MHz,  $\text{CDCl}_3$ ) for *N-tert-butoxycarbonyl-N'-tert-butyl-N-(3-chloropent-1-yl)sulfamide (4i)*

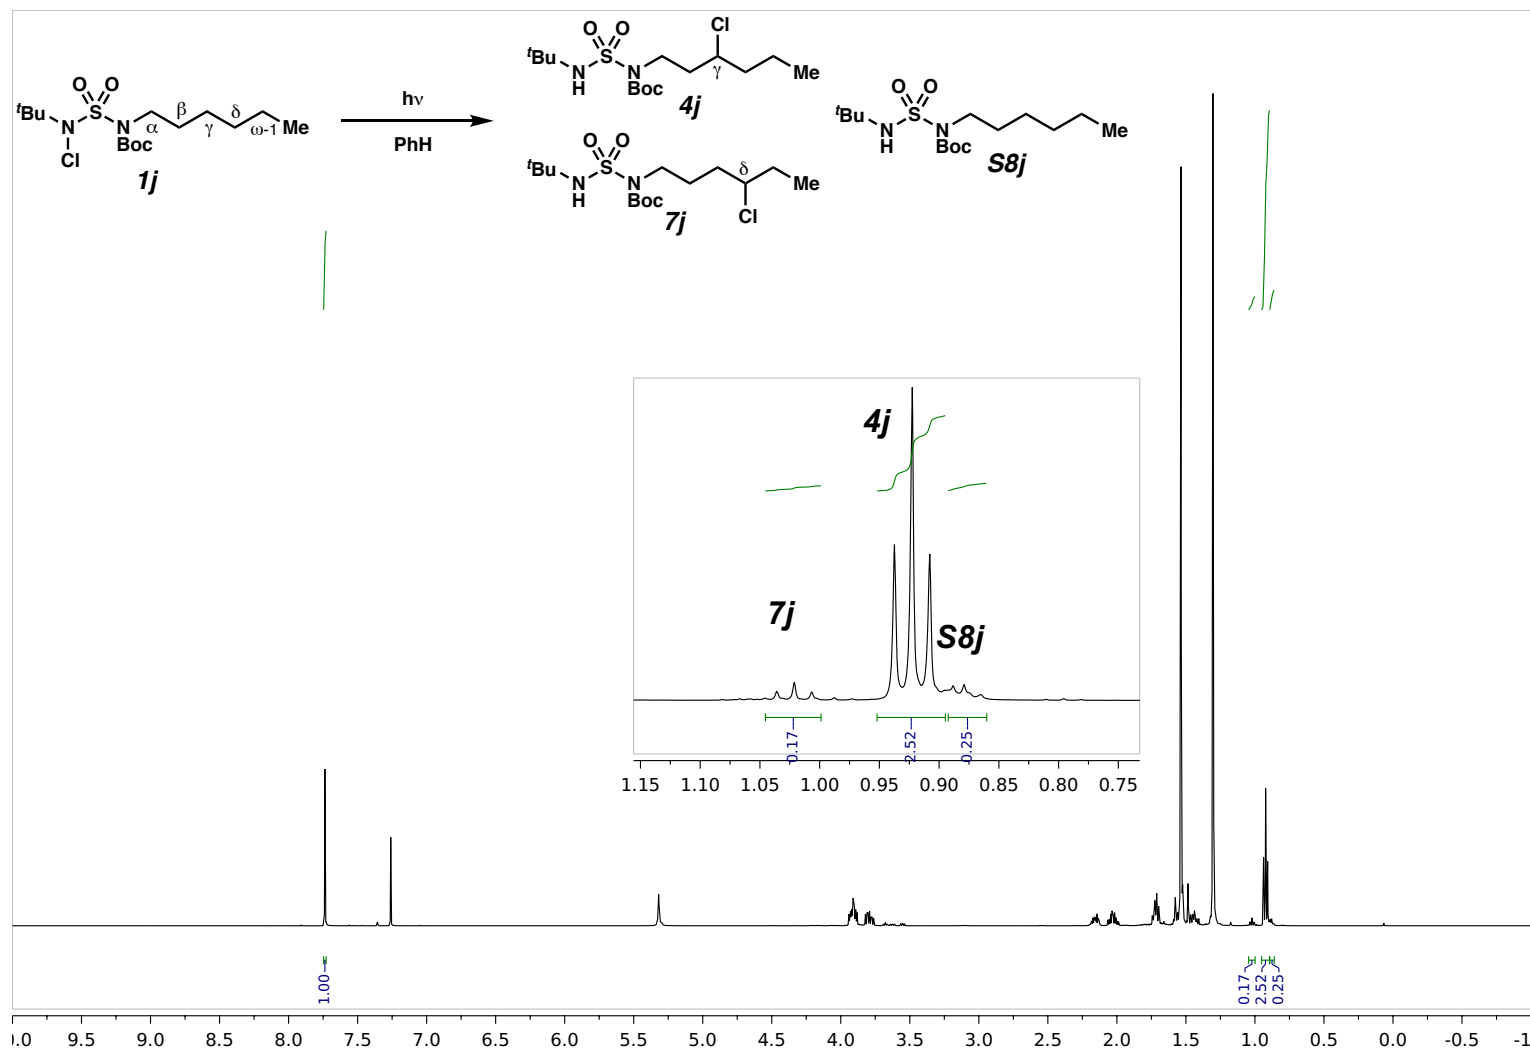

Crude  $^1\text{H}$  NMR (500 MHz,  $\text{CDCl}_3$ , 25s relaxation delay) for chlorine-transfer reaction of *N*-chlorosulfamide **1j**

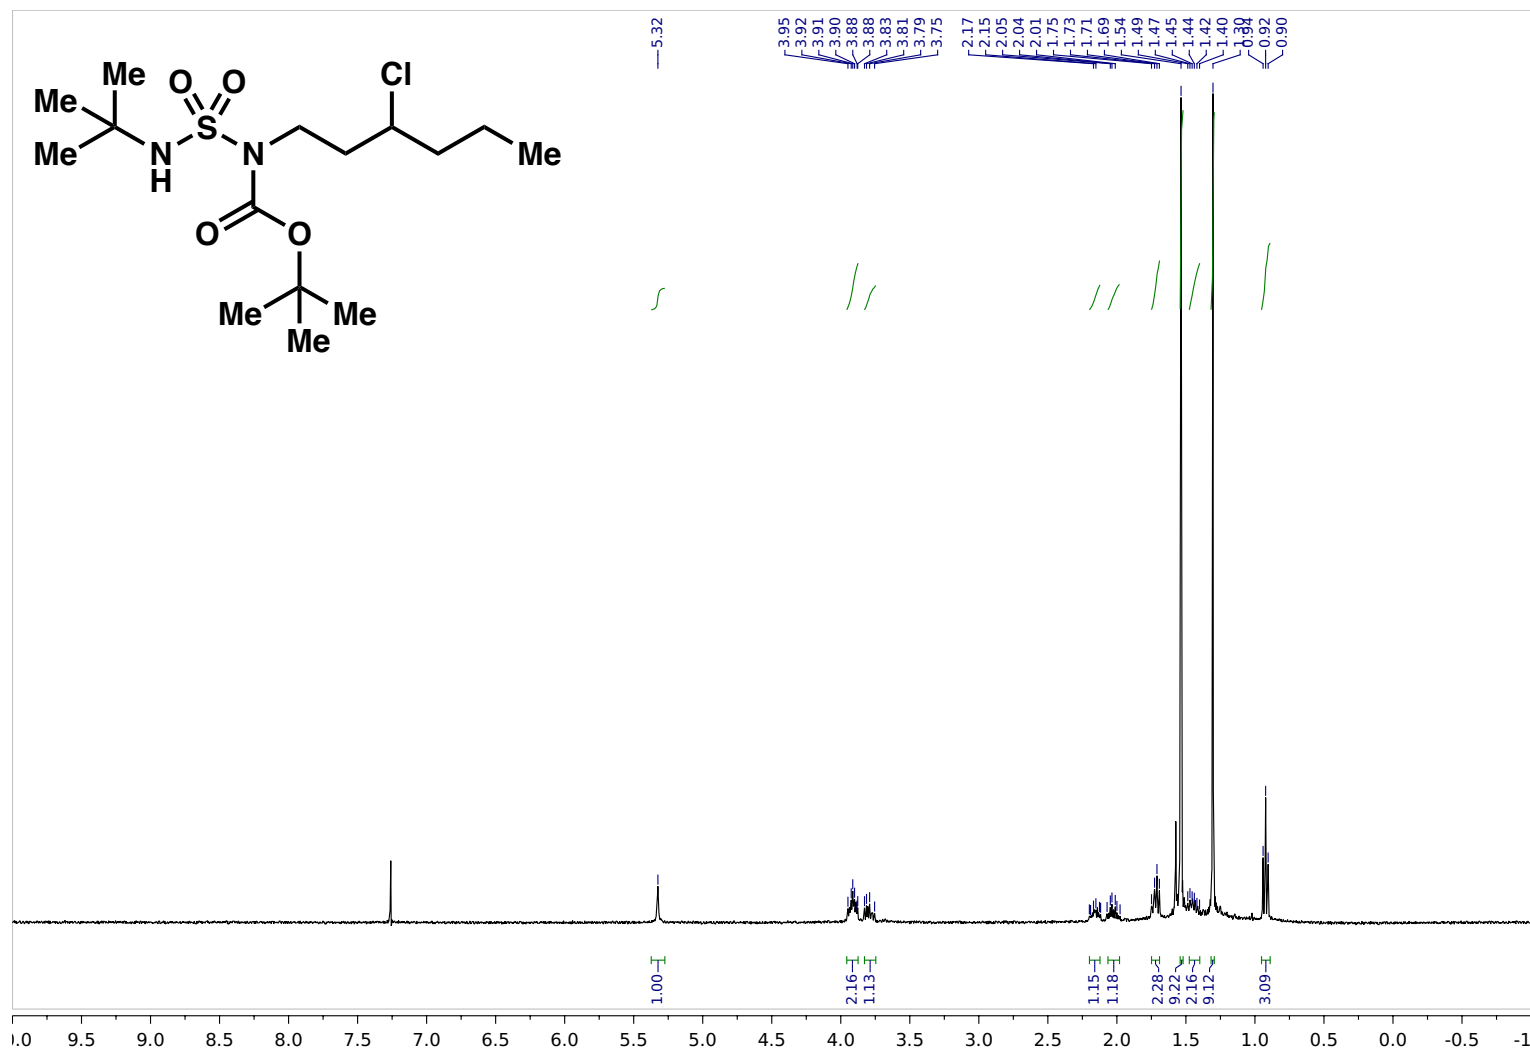

<sup>1</sup>H NMR (400 MHz, CDCl<sub>3</sub>) for *N*-*tert*-butoxycarbonyl-*N'*-*tert*-butyl-*N*-(3-chlorohexyl)sulfamide (**4j**)

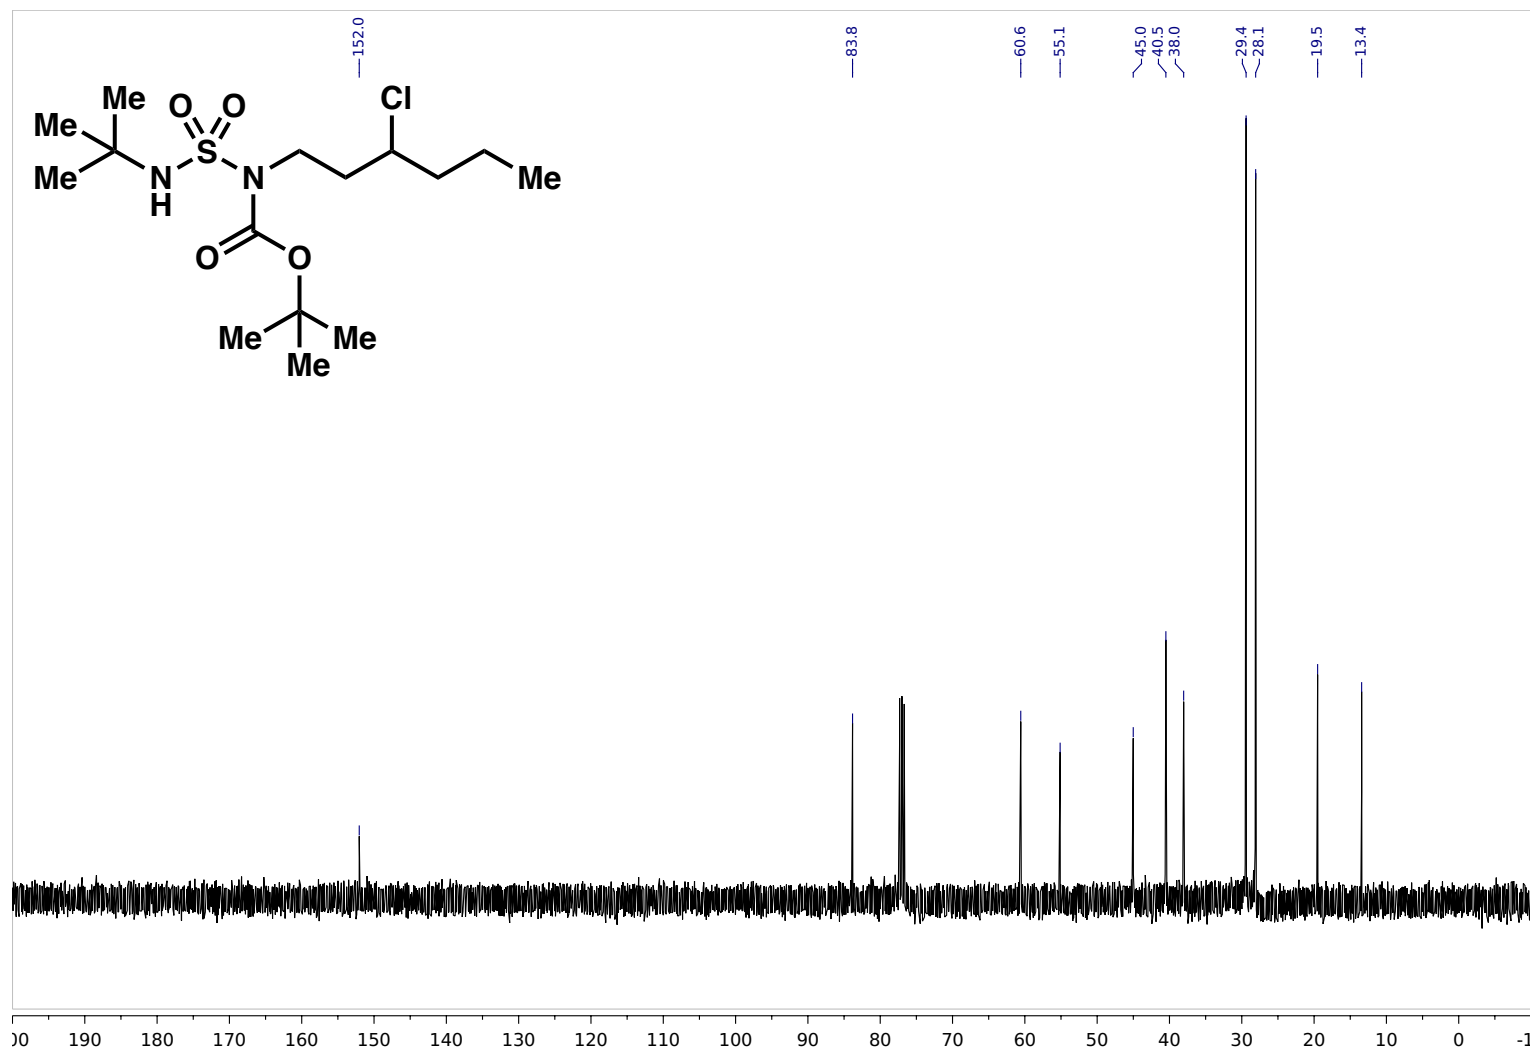

$^{13}\text{C}$  NMR (101 MHz,  $\text{CDCl}_3$ ) for *N*-*tert*-butoxycarbonyl-*N'*-*tert*-butyl-*N*-(3-chlorohexyl)sulfamide (4j)



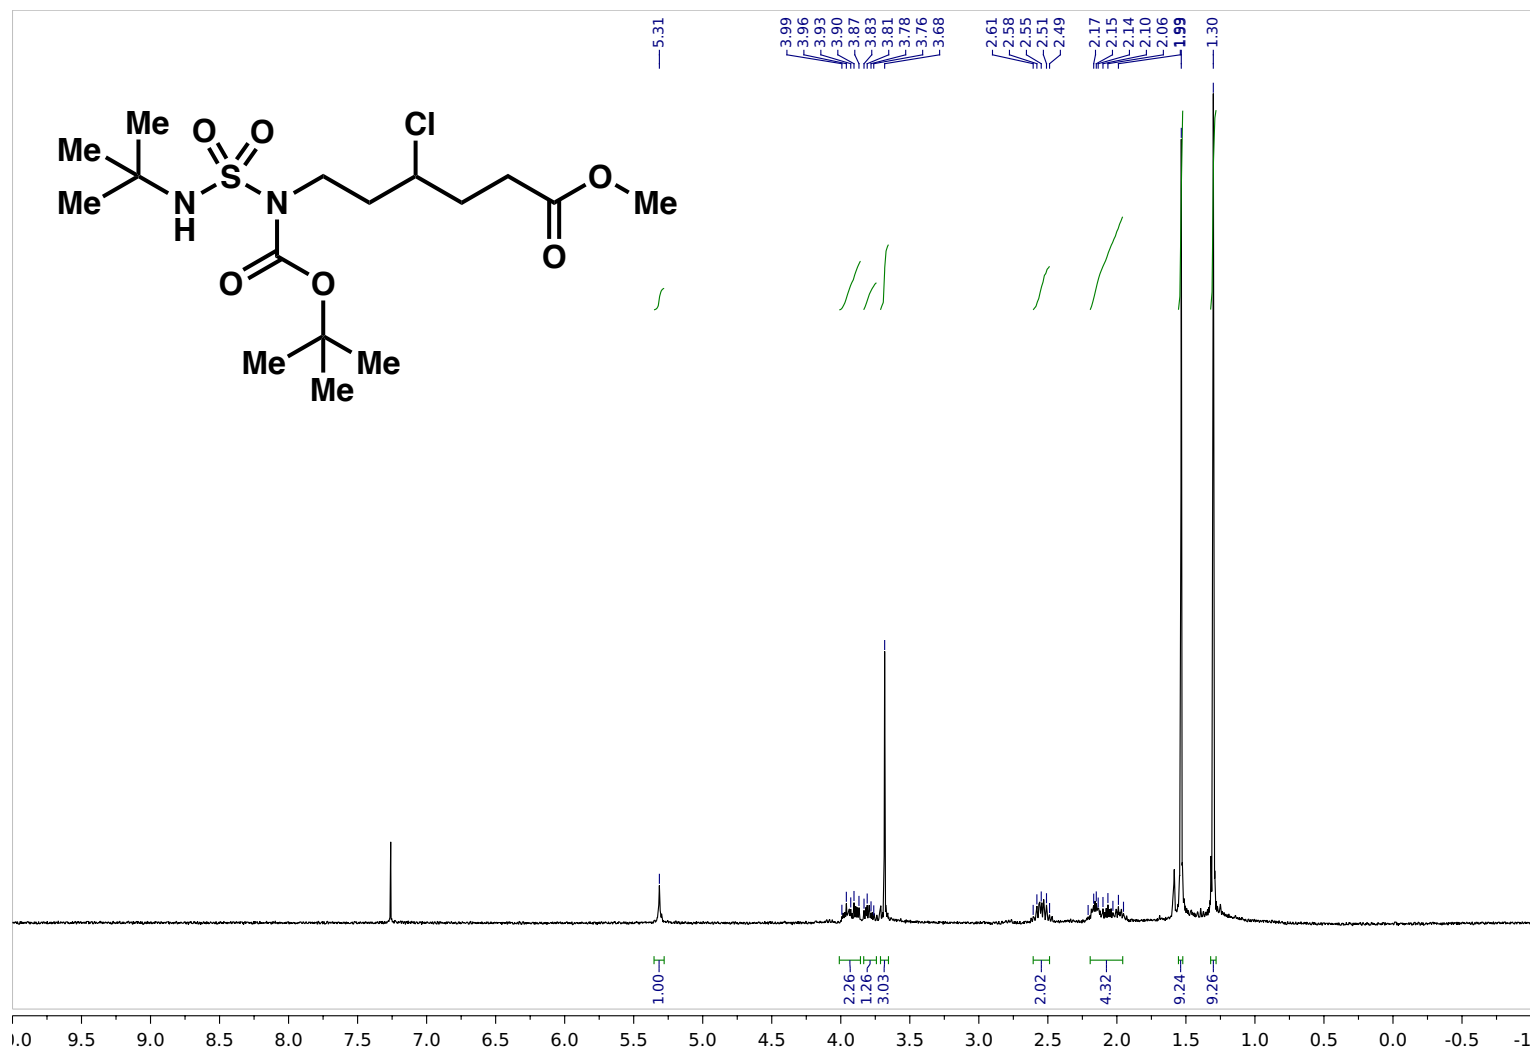

<sup>1</sup>H NMR (400 MHz, CDCl<sub>3</sub>) for *N*-*tert*-butyloxycarbonyl-*N'*-*tert*-butyl-*N*-(methyl 4-chlorohexano-6-yl)sulfamide (**4k**)

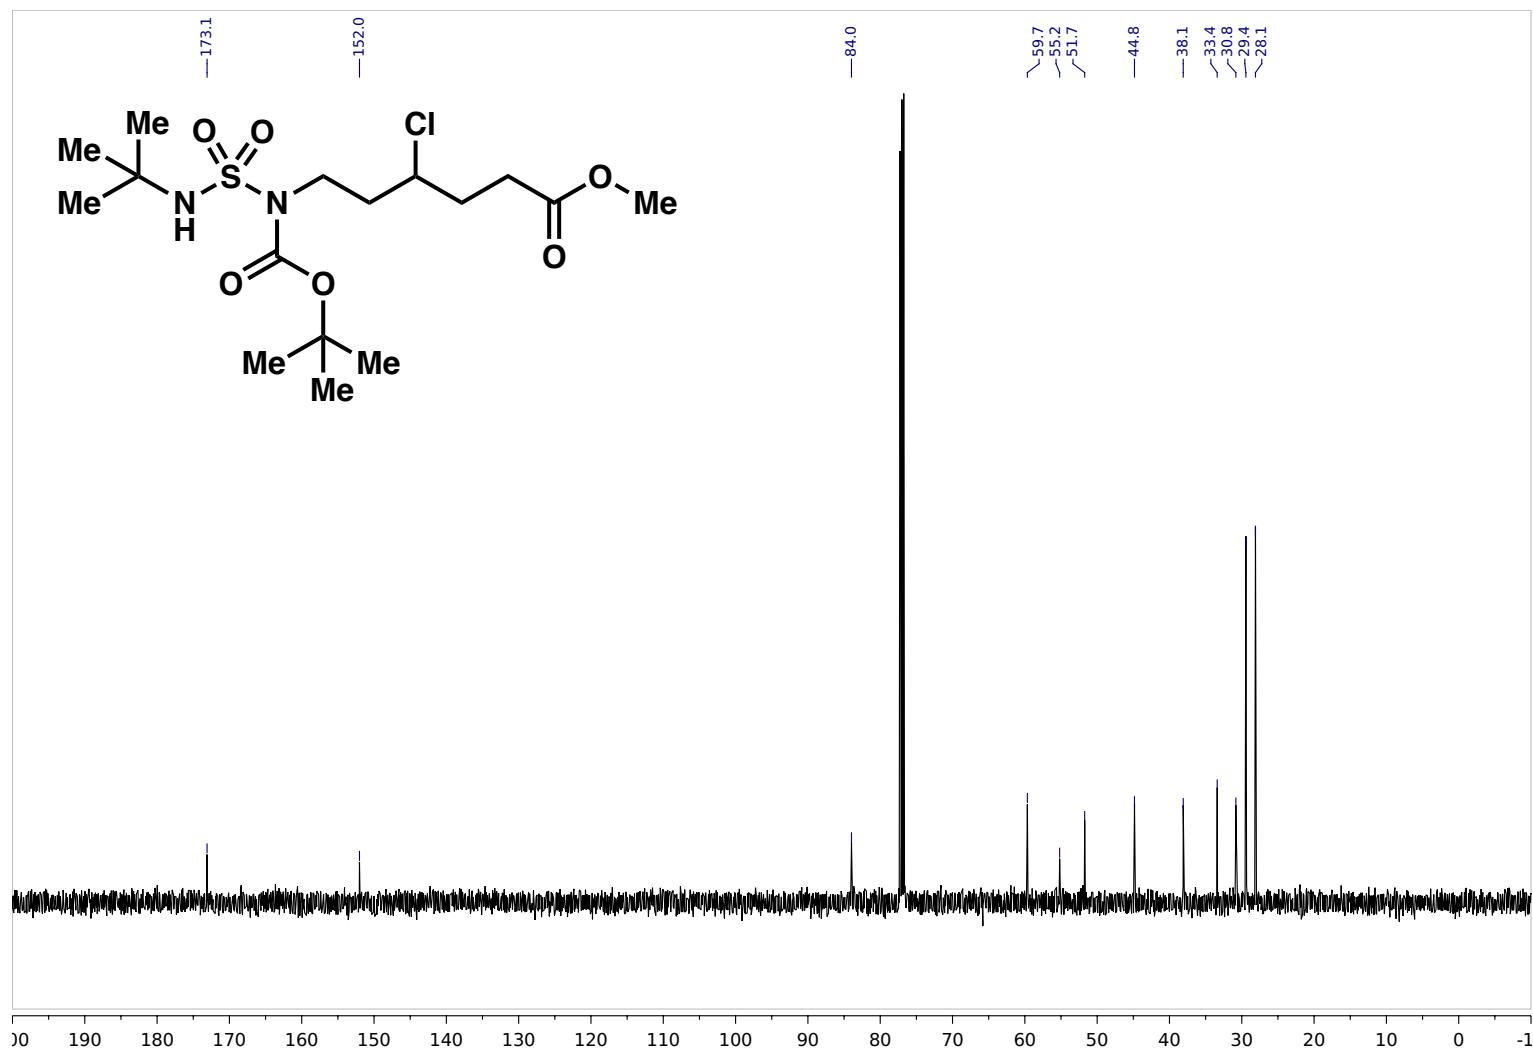

<sup>13</sup>C NMR (126 MHz, CDCl<sub>3</sub>) for *N*-*tert*-butyloxycarbonyl-*N'*-*tert*-butyl-*N*-(methyl 4-chlorohexano-6-yl)sulfamide (4k)

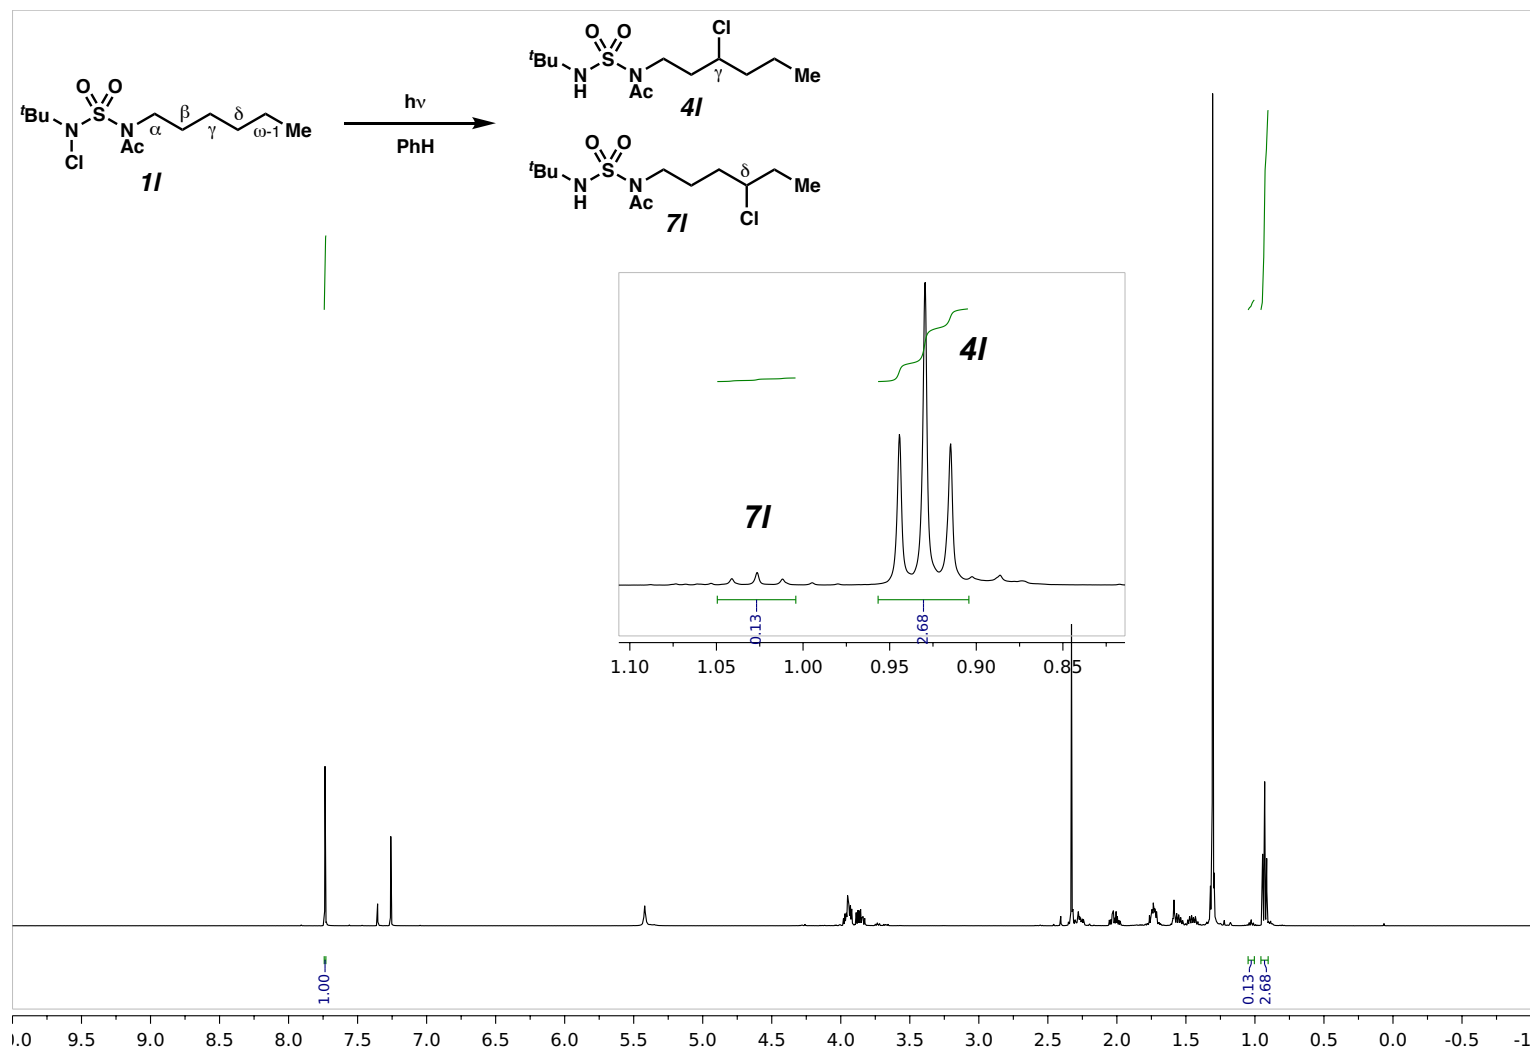

Crude  $^1\text{H}$  NMR (500 MHz,  $\text{CDCl}_3$ , 25s relaxation delay) for chlorine-transfer reaction of *N*-chlorosulfamide **11**

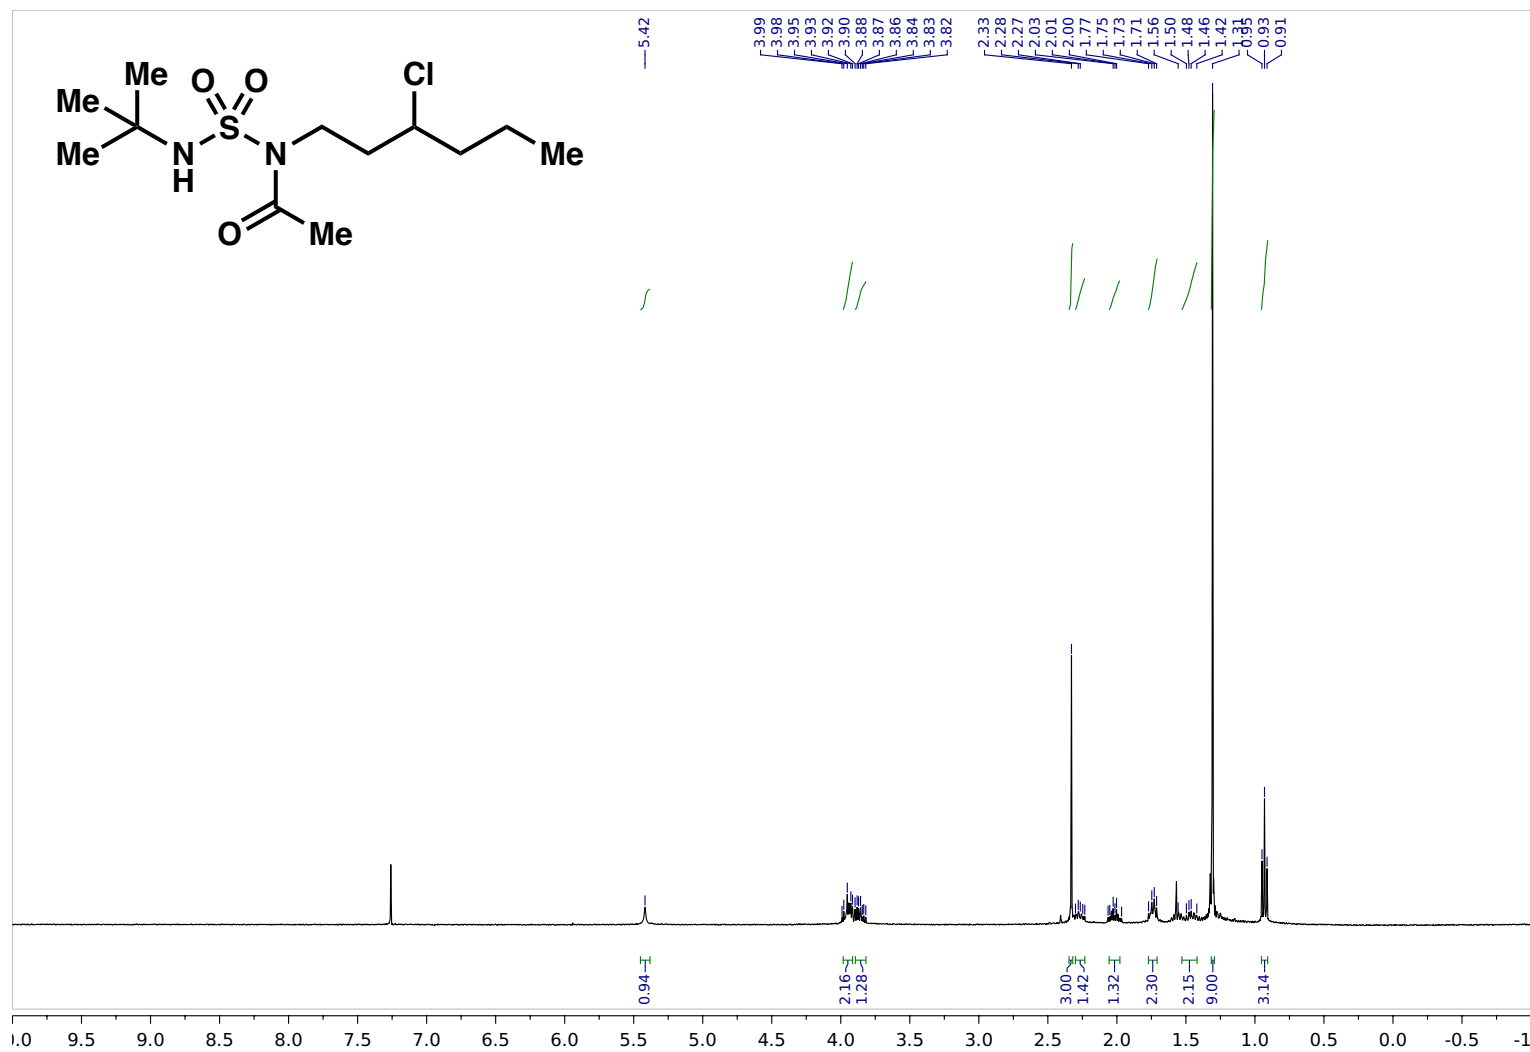

<sup>1</sup>H NMR (400 MHz, CDCl<sub>3</sub>) for *N*-tert-butoxycarbonyl-*N'*-tert-butyl-*N*-(3-chlorohex-1-yl)sulfamide (41)

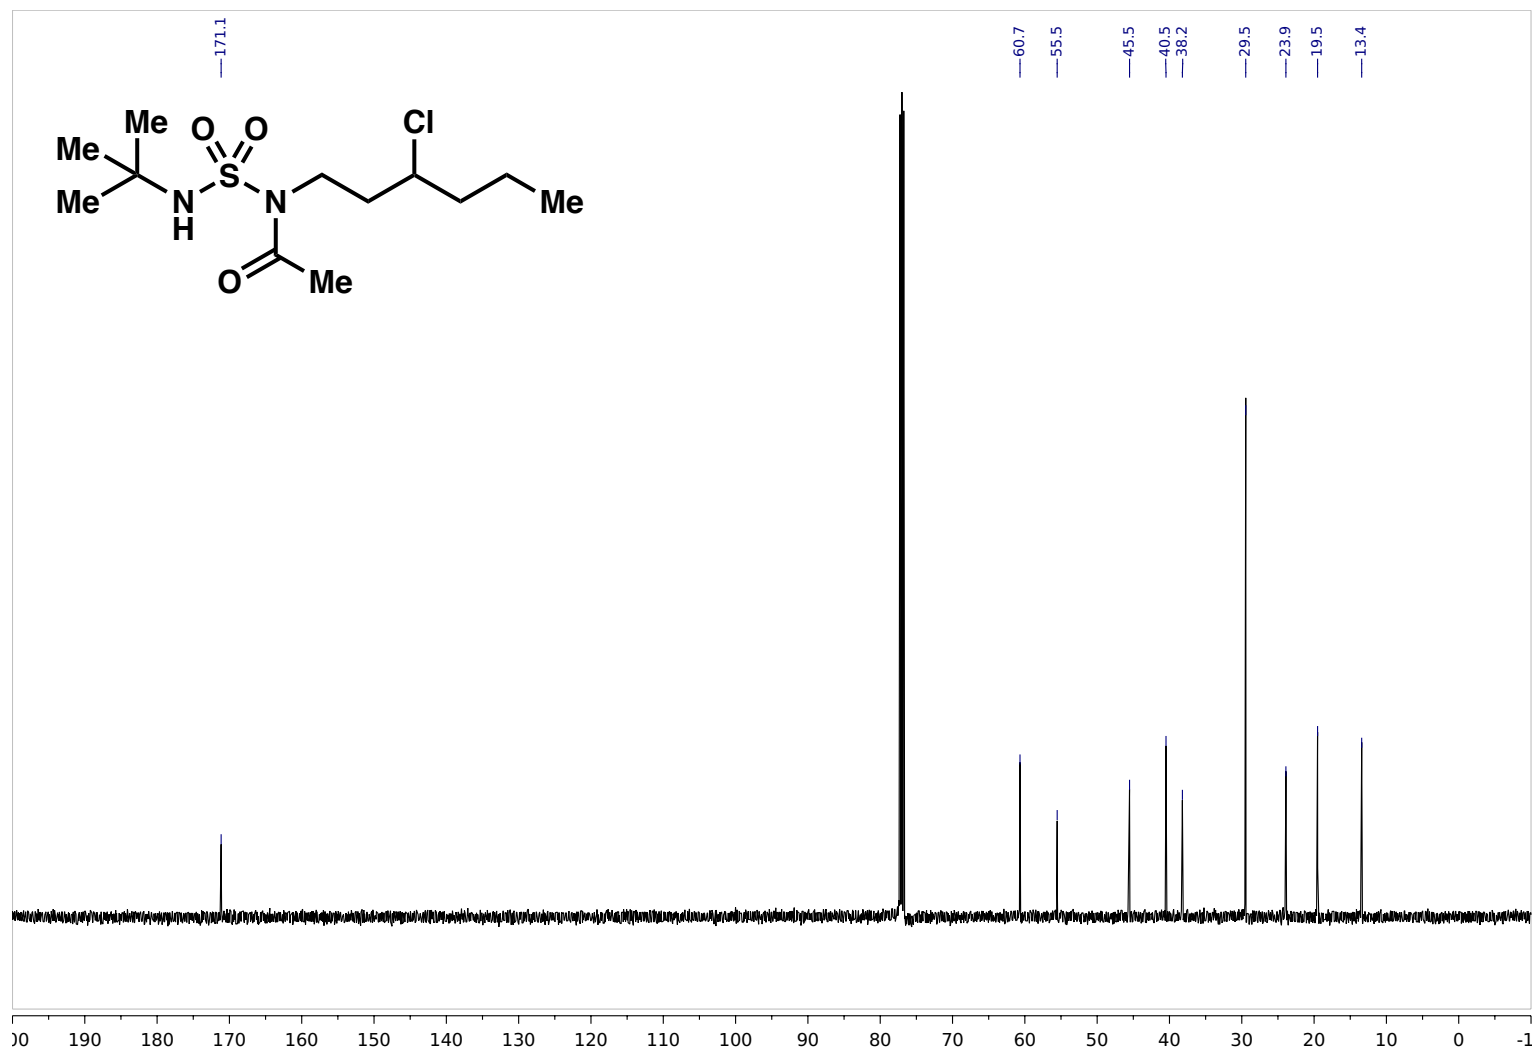

<sup>13</sup>C NMR (126 MHz, CDCl<sub>3</sub>) for *N*-*tert*-butoxycarbonyl-*N'*-*tert*-butyl-*N*-(3-chlorohex-1-yl)sulfamide (**41**)

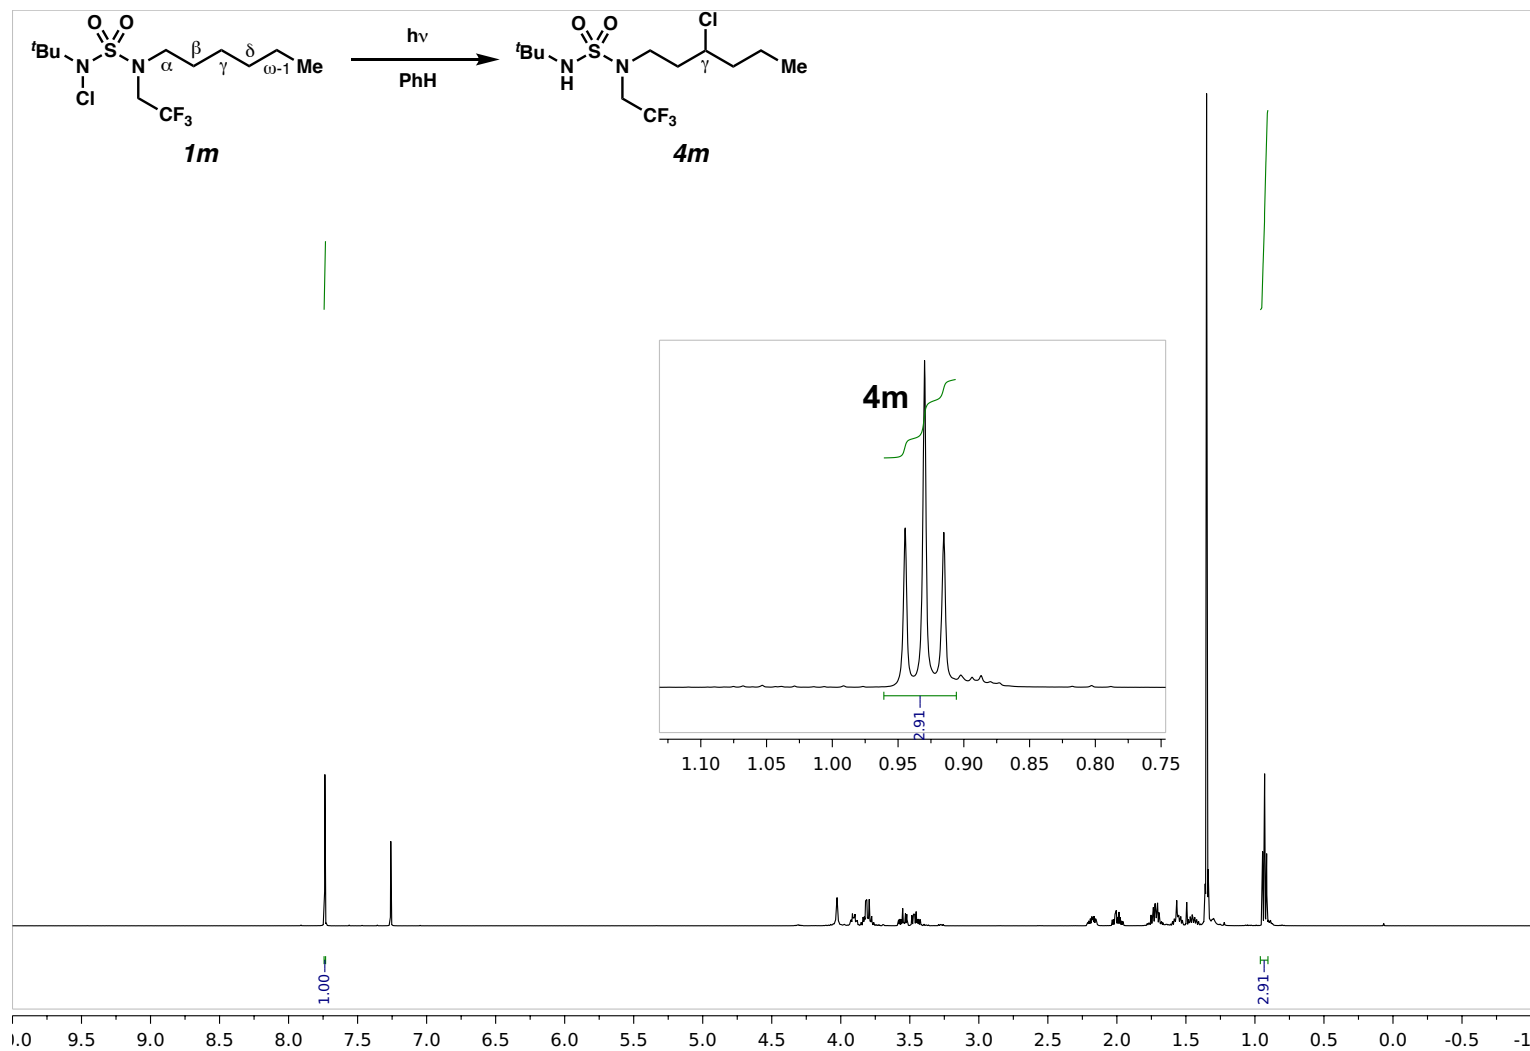

Crude <sup>1</sup>H NMR (500 MHz, CDCl<sub>3</sub>, 25s relaxation delay) for chlorine-transfer reaction of *N*-chlorosulfamide **1m**

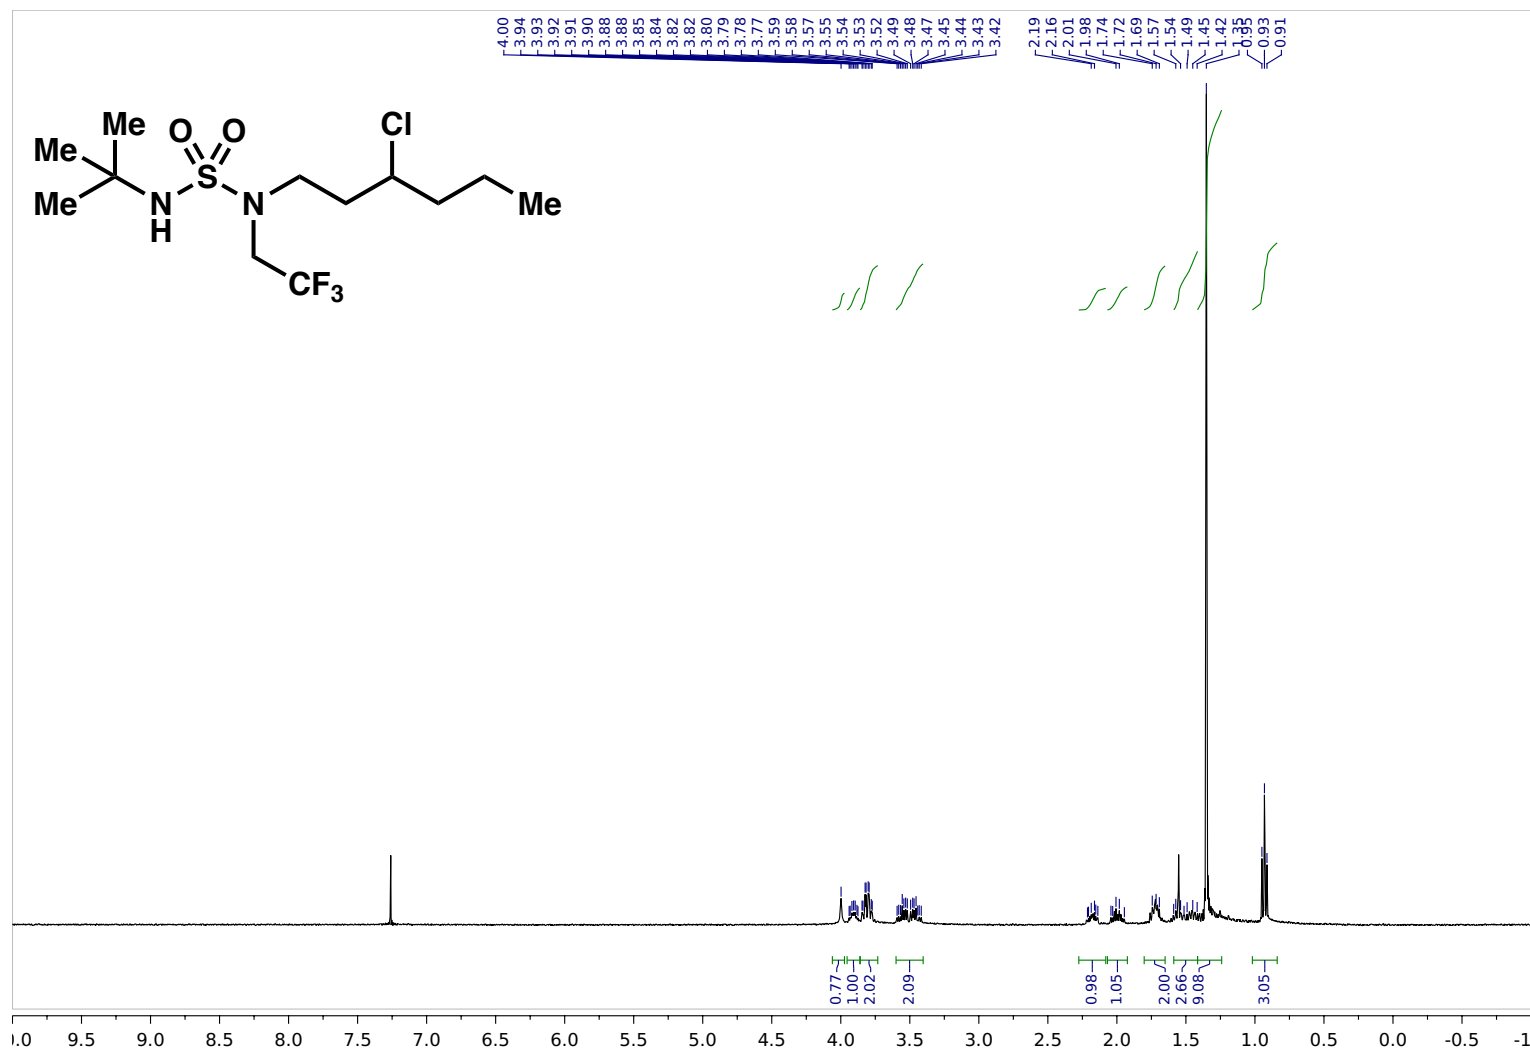

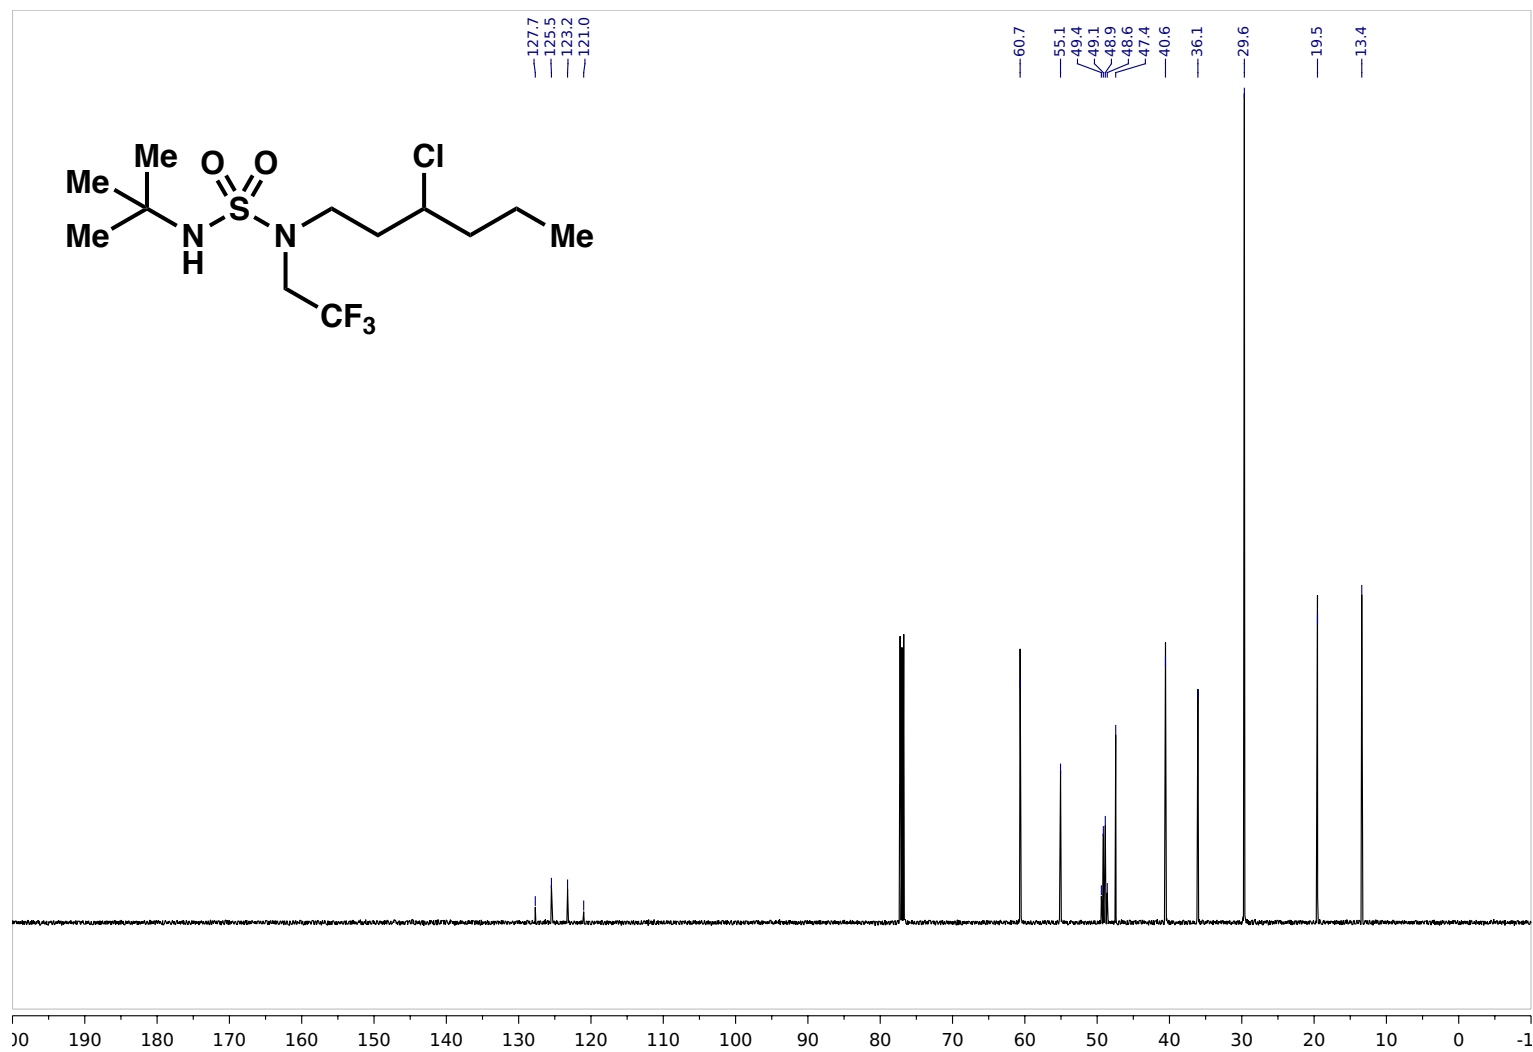

<sup>13</sup>C NMR (126 MHz, CDCl<sub>3</sub>) for *N*-*tert*-butyl-*N'*-(3-chlorohex-1-yl)-*N''*-(2,2,2-trifluoroethyl)sulfamide (**4m**)



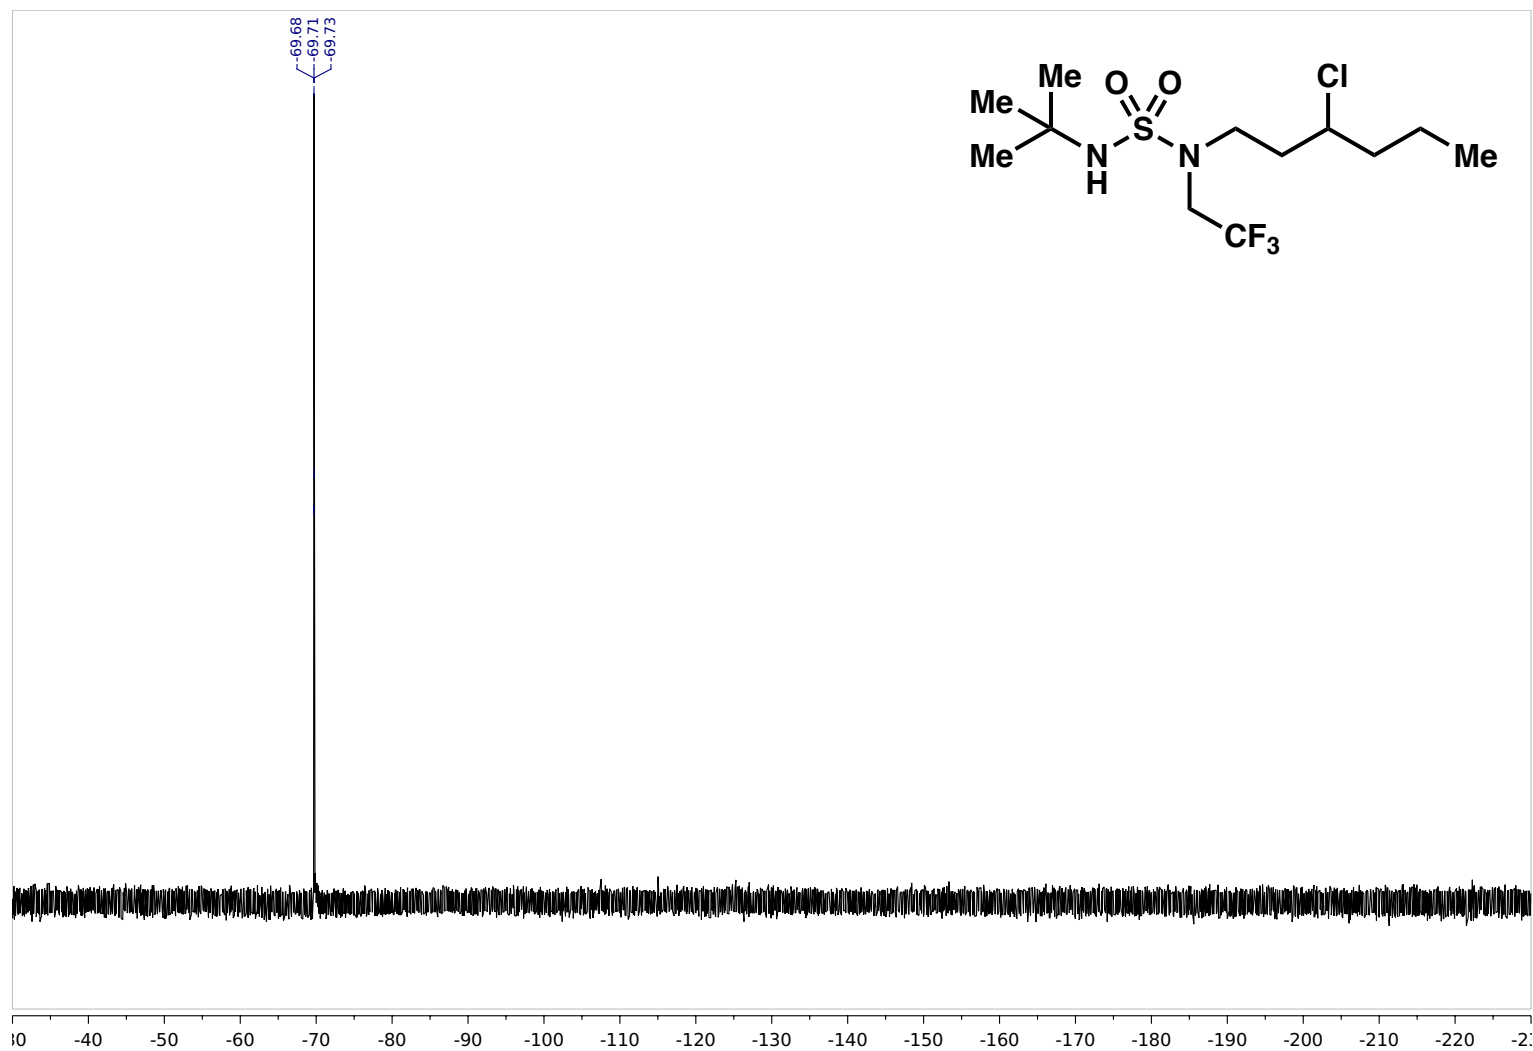

$^{19}\text{F}$  NMR (376 MHz,  $\text{CDCl}_3$ ) for *N*-*tert*-butyl-*N'*-(3-chlorohex-1-yl)-*N'*-(2,2,2-trifluoroethyl)sulfamide (**4m**)

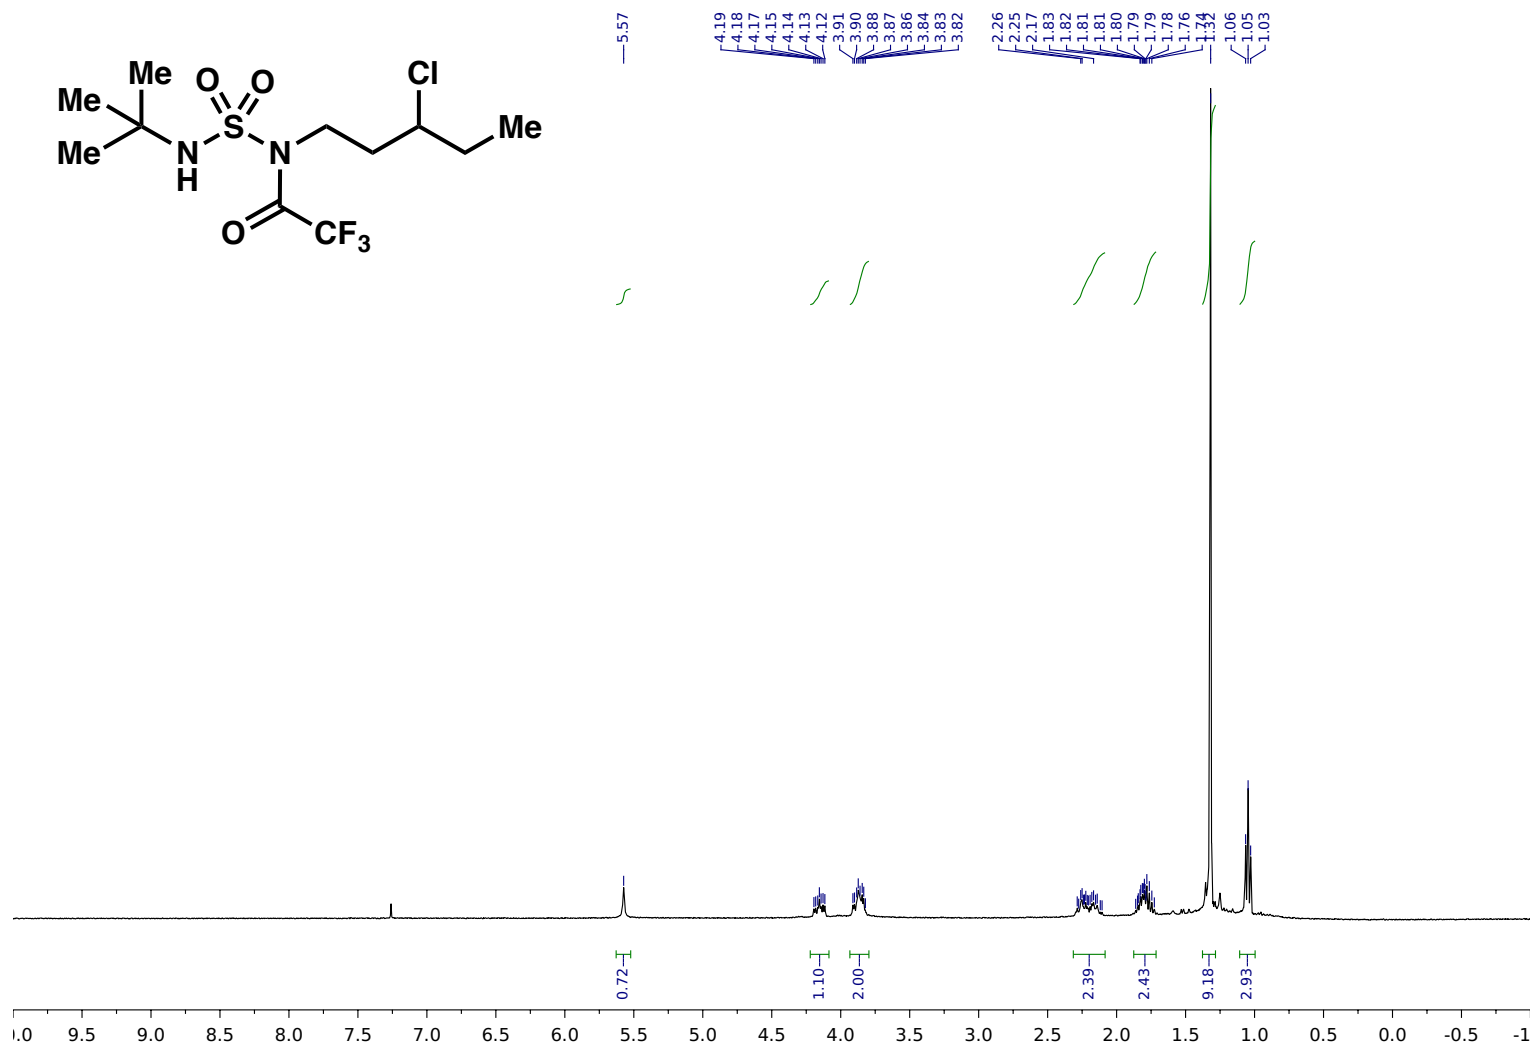

<sup>1</sup>H NMR (400 MHz, CDCl<sub>3</sub>) for *N'*-*tert*-butyl-*N*-(3-chloroprop-1-yl)-*N*-trifluoroacetylsulfamide (**4n**)

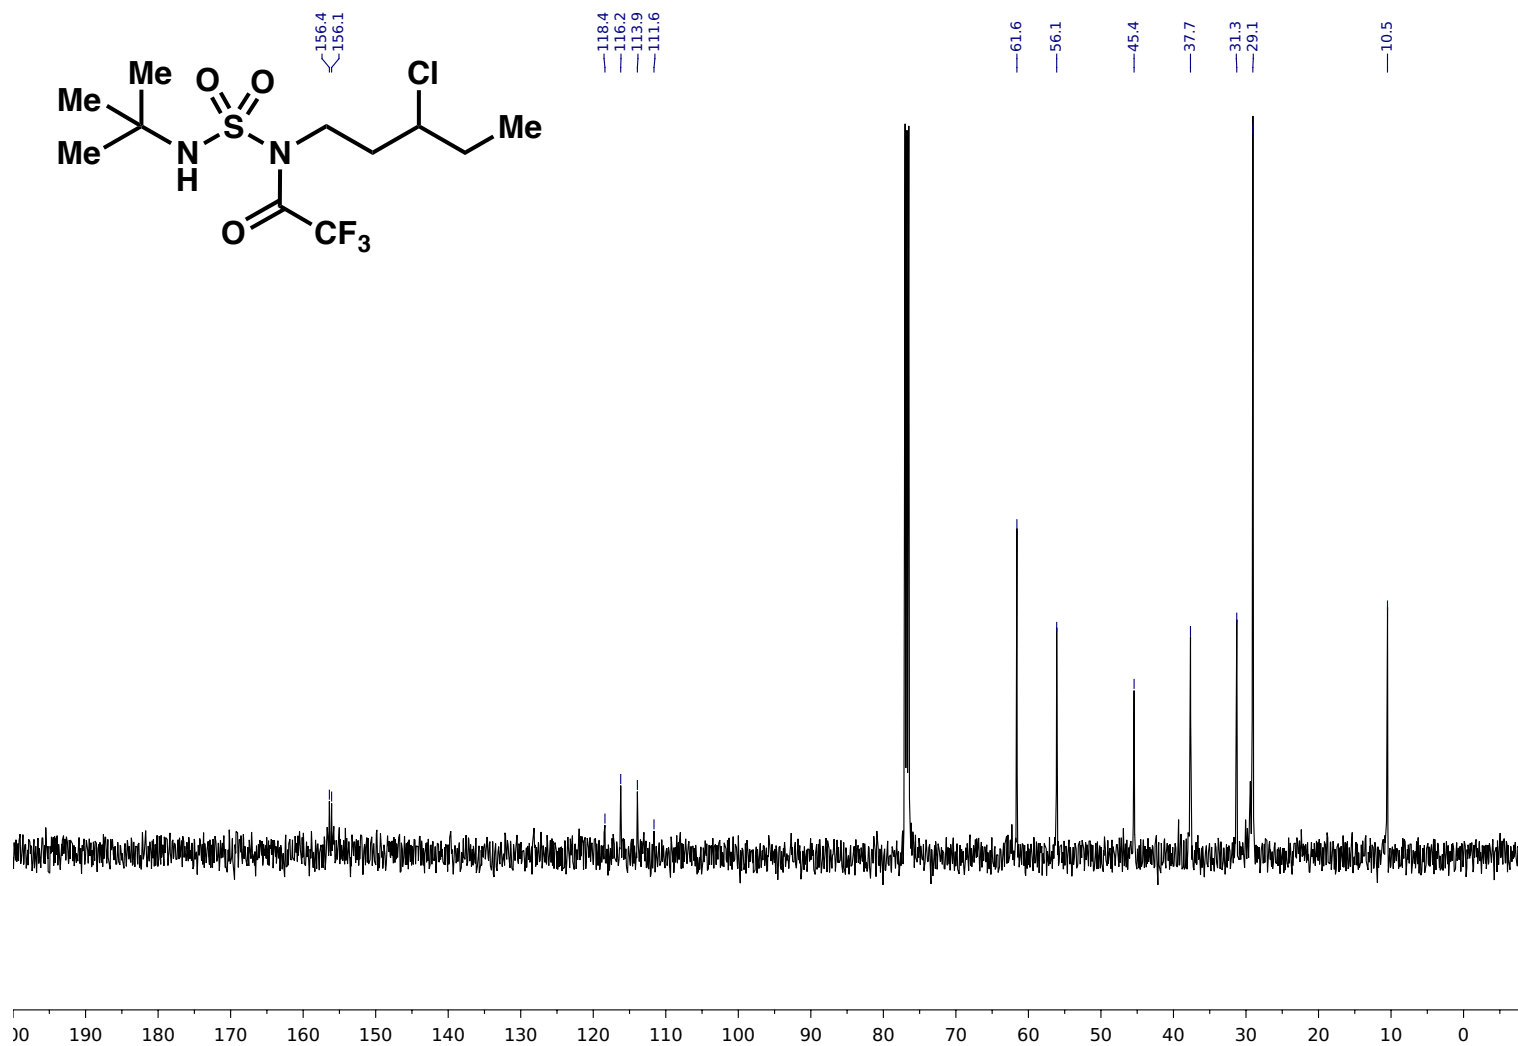

$^{13}\text{C}$  NMR (126 MHz,  $\text{CDCl}_3$ ) for *N'*-*tert*-butyl-*N*-(3-chloropent-1-yl)-*N*-trifluoroacetylsulfamide (**4n**)

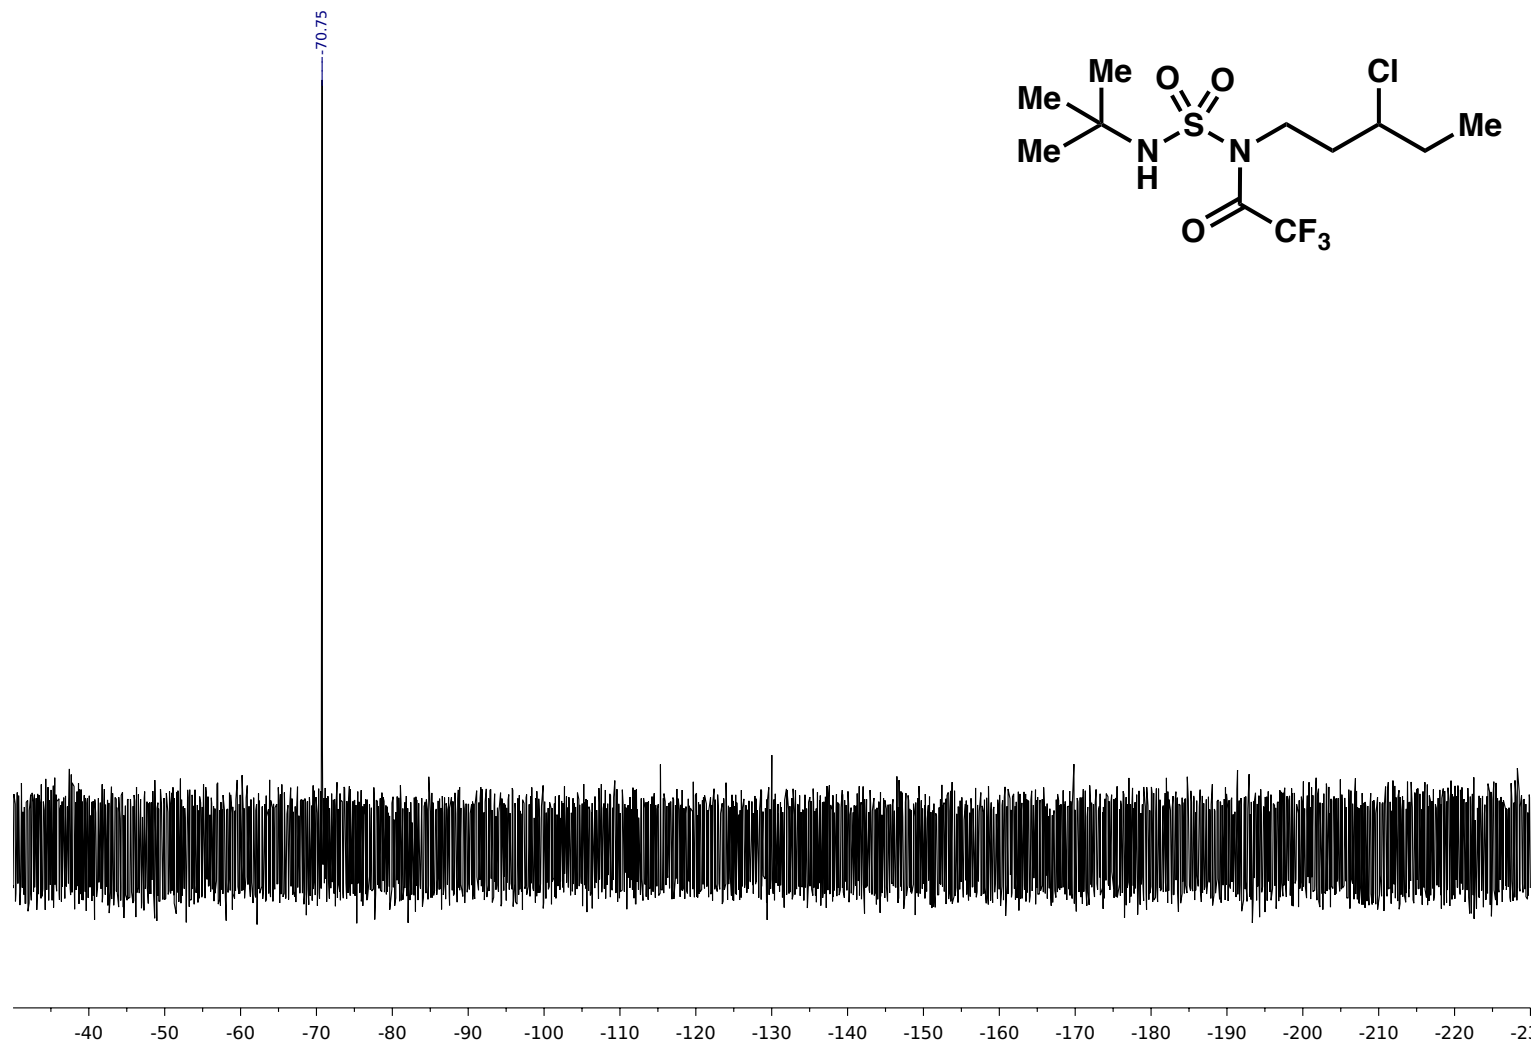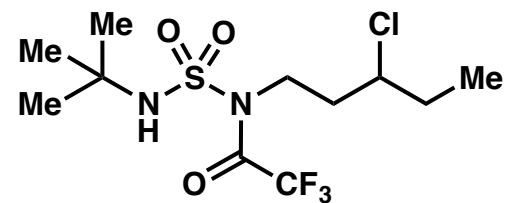

$^{19}\text{F}$  NMR (376 MHz,  $\text{CDCl}_3$ ) for *N'*-*tert*-butyl-*N*-(3-chloropent-1-yl)-*N*-trifluoroacetylsulfamide (**4n**)

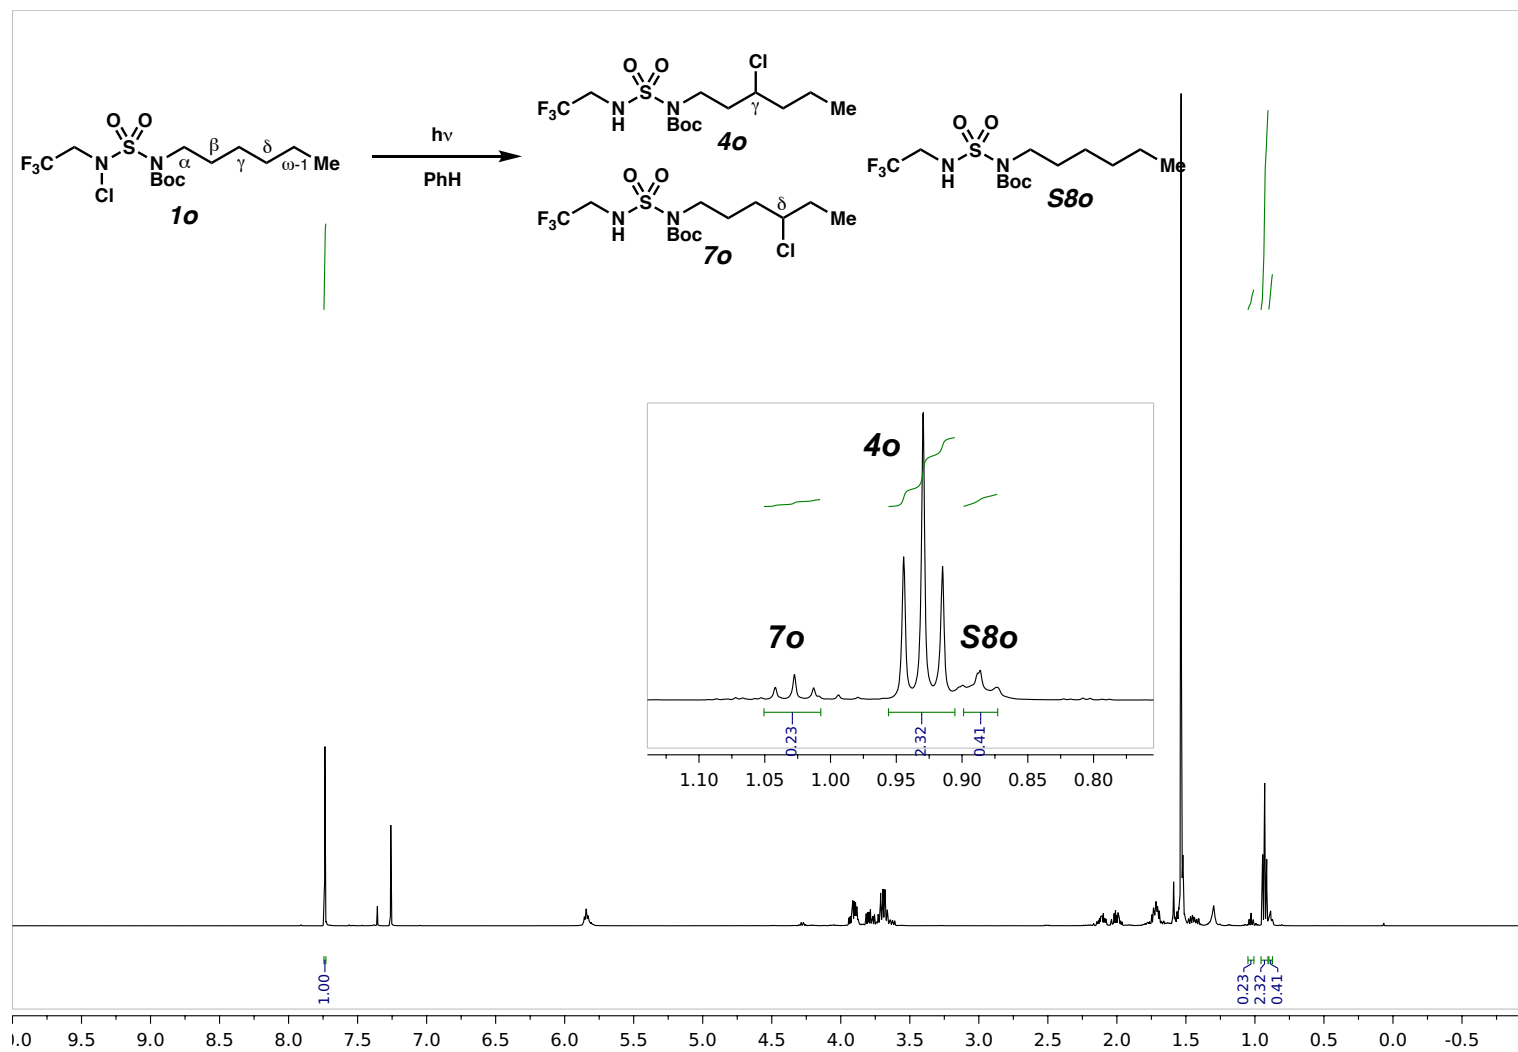

Crude  $^1\text{H}$  NMR (500 MHz,  $\text{CDCl}_3$ , 25s relaxation delay) for chlorine-transfer reaction of *N*-chlorosulfamide **1o**

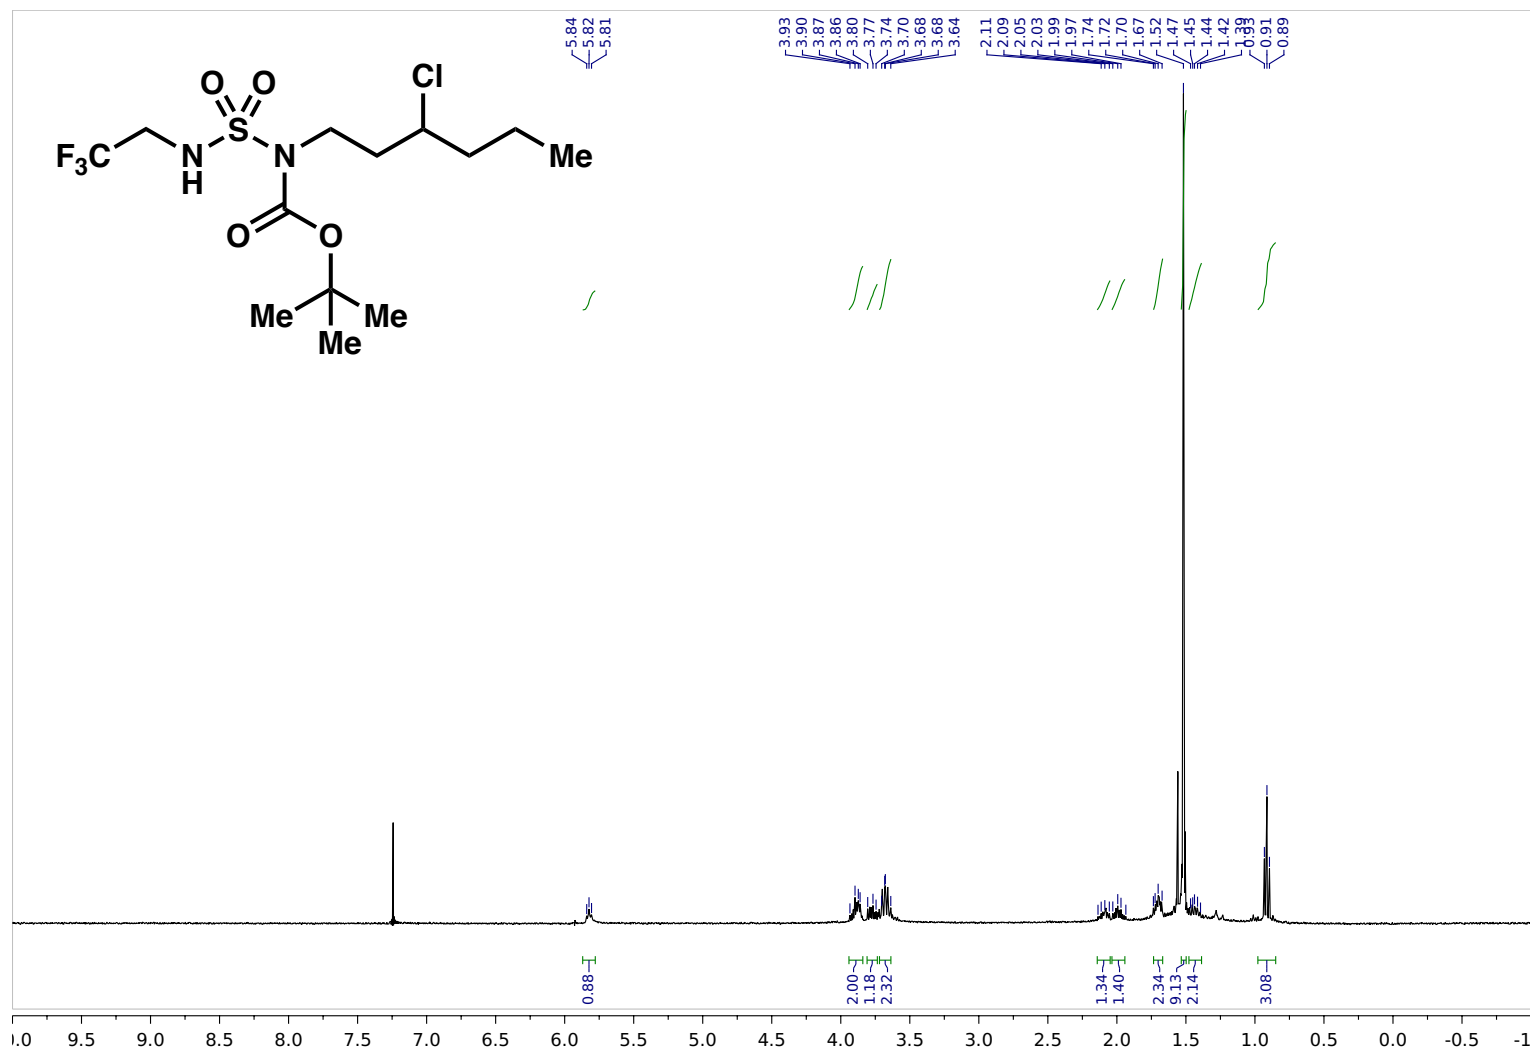

<sup>1</sup>H NMR (400 MHz, CDCl<sub>3</sub>) for *N-tert*-butoxycarbonyl-*N*-(3-chlorohex-1-yl)-*N'*-(2,2,2-trifluoroethyl)sulfamide (**4o**)

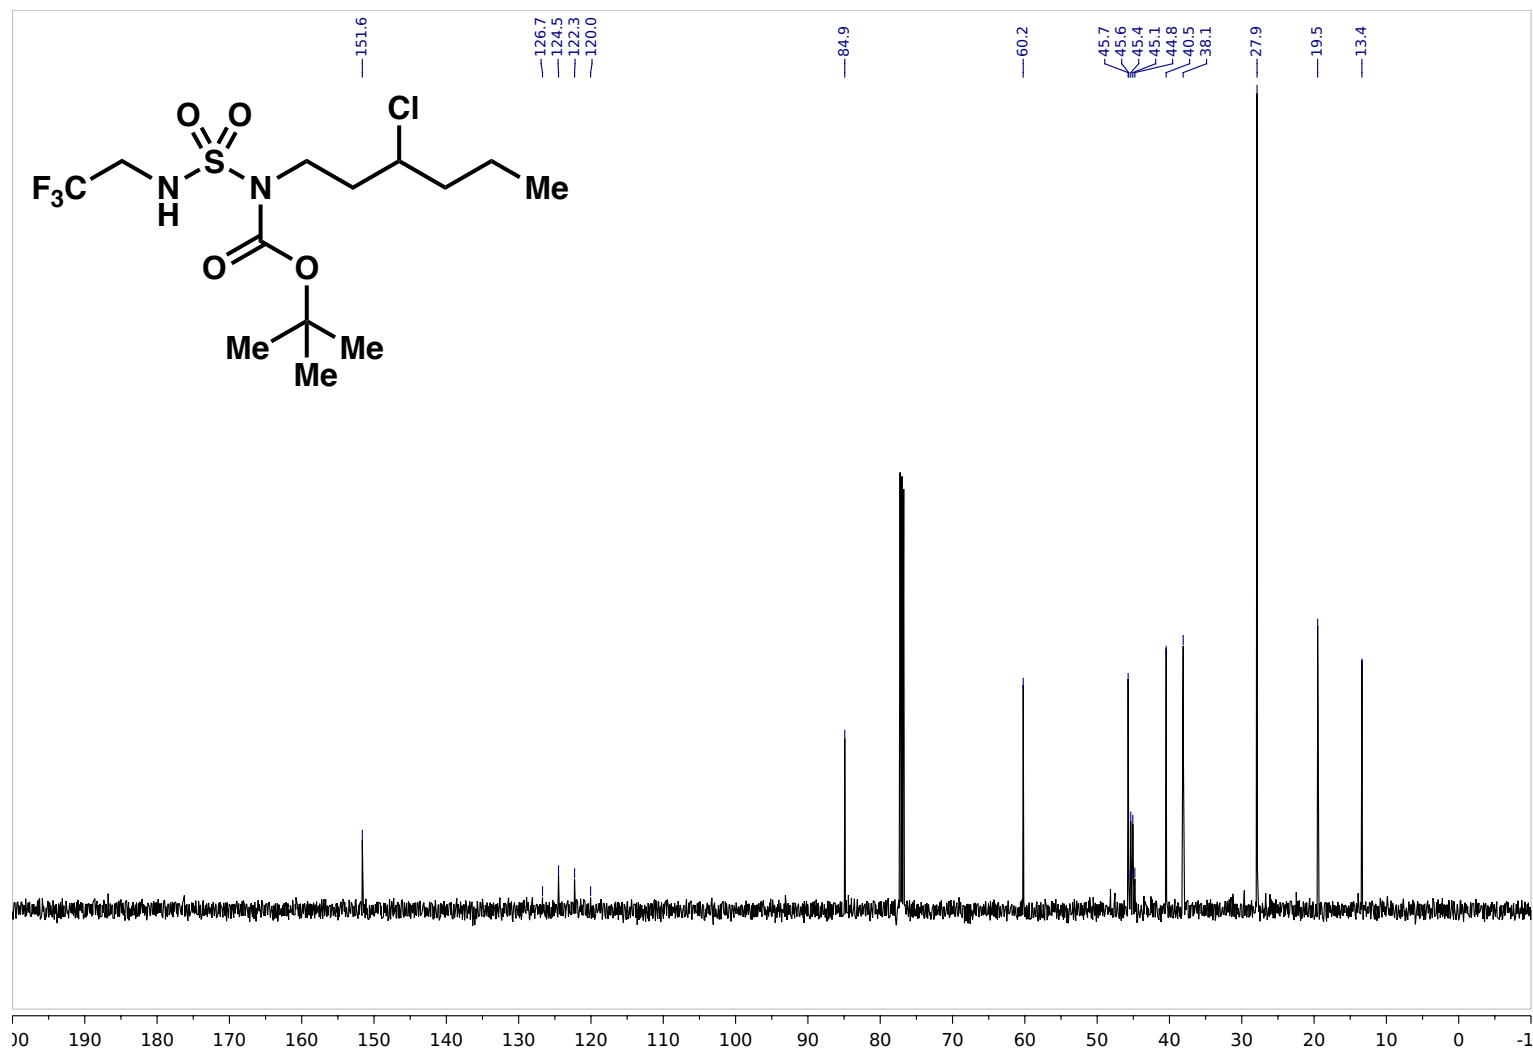

<sup>13</sup>C NMR (126 MHz, CDCl<sub>3</sub>) for *N-tert-butoxycarbonyl-N-(3-chlorohex-1-yl)-N'-(2,2,2-trifluoroethyl)sulfamide (40)*

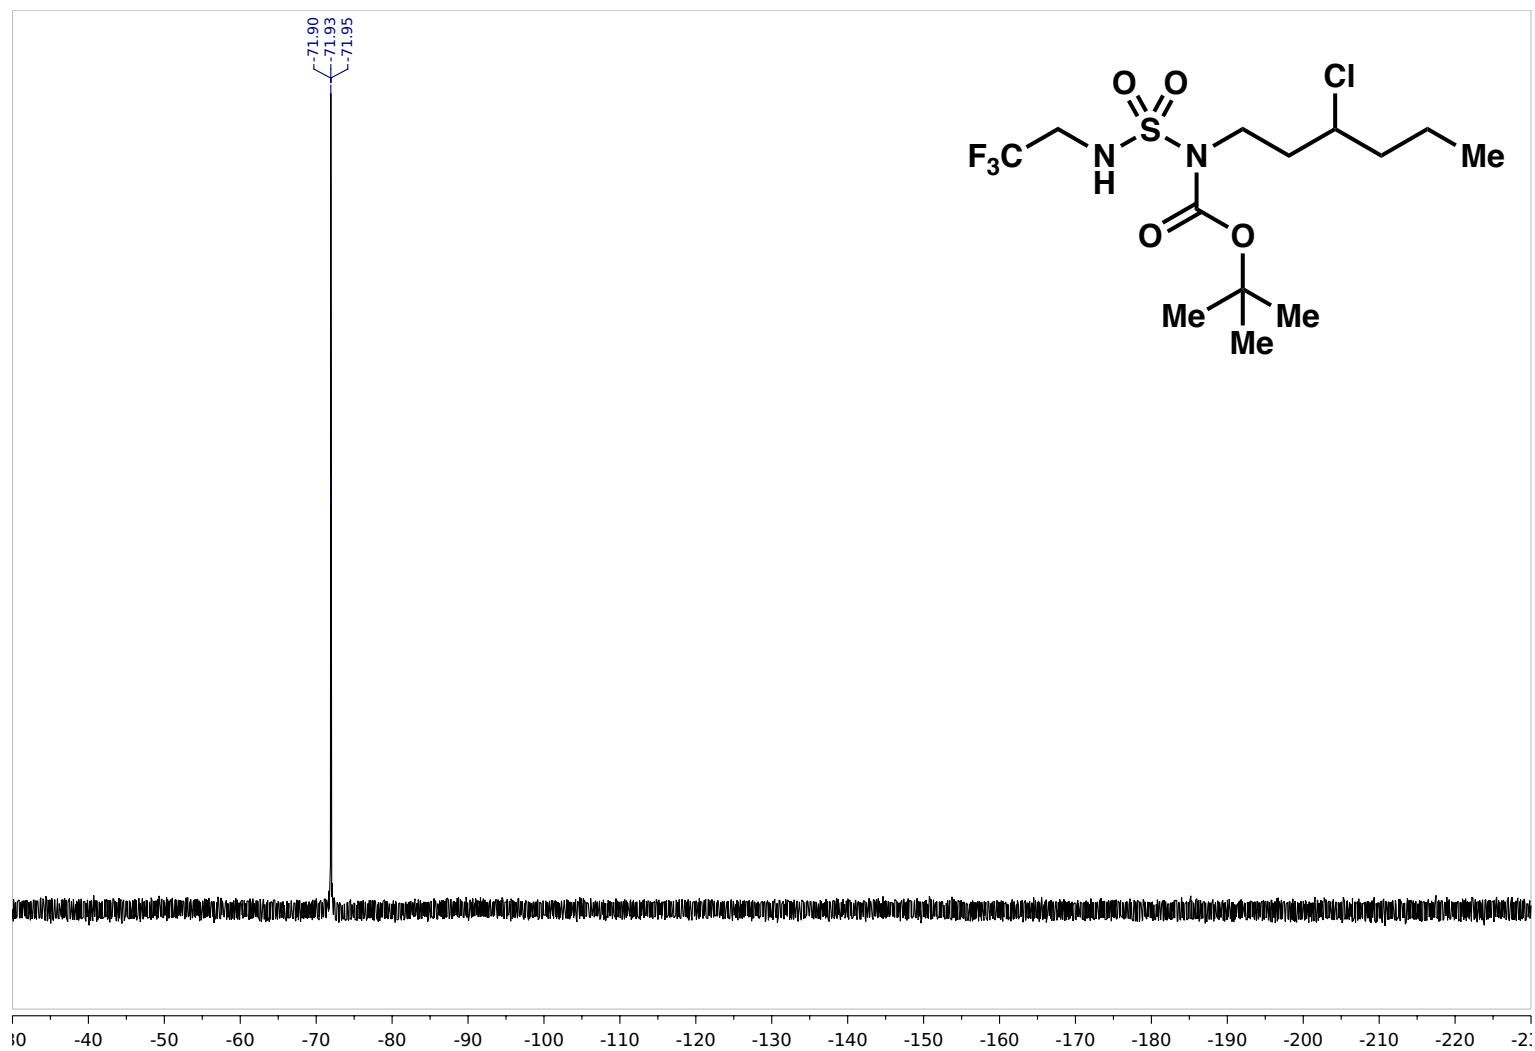

$^{19}\text{F}$  NMR (376 MHz,  $\text{CDCl}_3$ ) for *N-tert*-butoxycarbonyl-*N*-(3-chlorohex-1-yl)-*N'*-(2,2,2-trifluoroethyl)sulfamide (**40**)



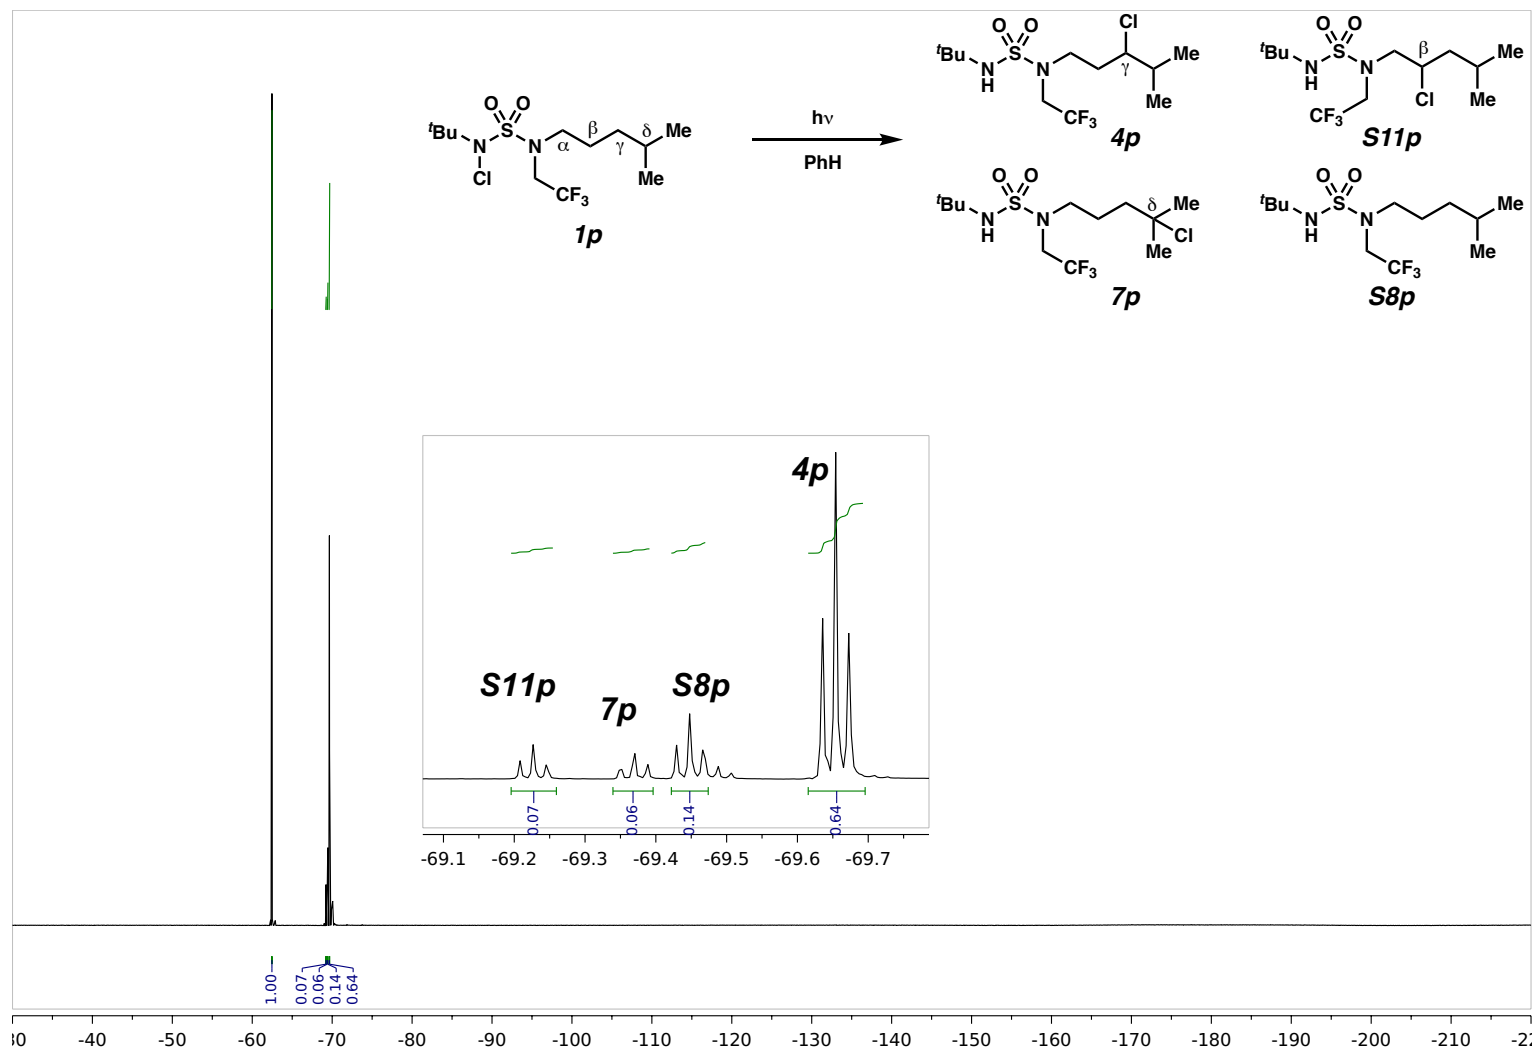

Crude  $^{19}\text{F}$  NMR (471 MHz,  $\text{CDCl}_3$ , 25s relaxation delay) for chlorine-transfer reaction of *N*-chlorosulfamide **1p**

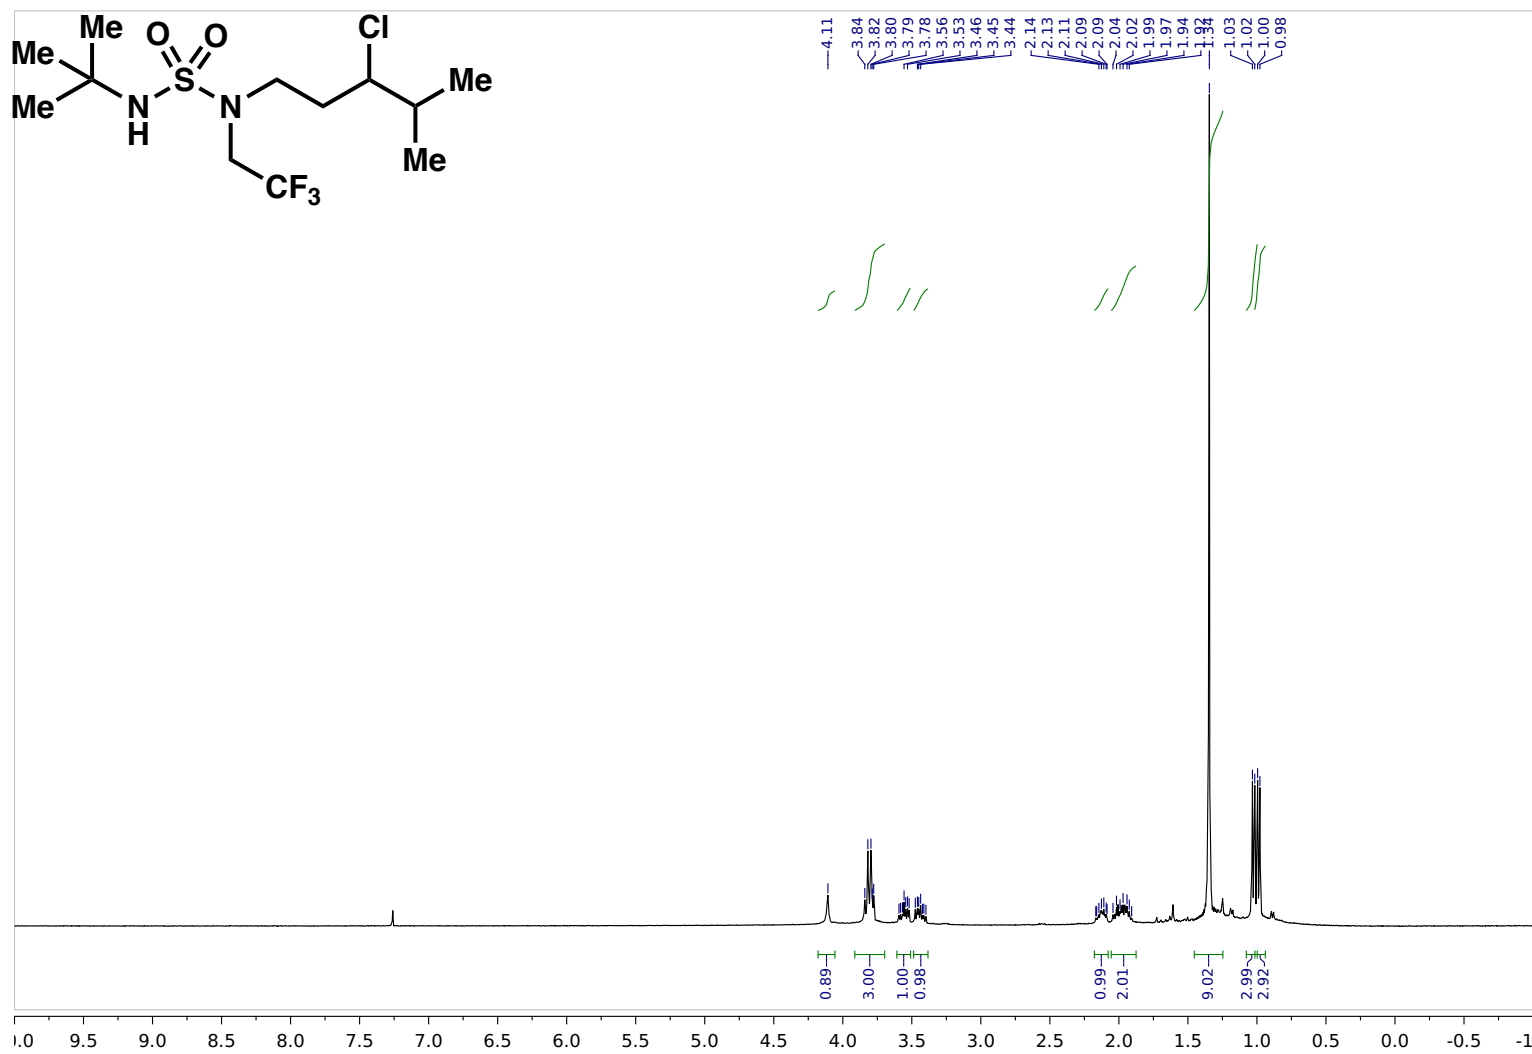

<sup>1</sup>H NMR (400 MHz, CDCl<sub>3</sub>) for *N*-*tert*-Butyl-*N'*-(3-chloro-4-methylpentyl)-*N'*-(2,2,2-trifluoroethyl)sulfamide (**4p**)

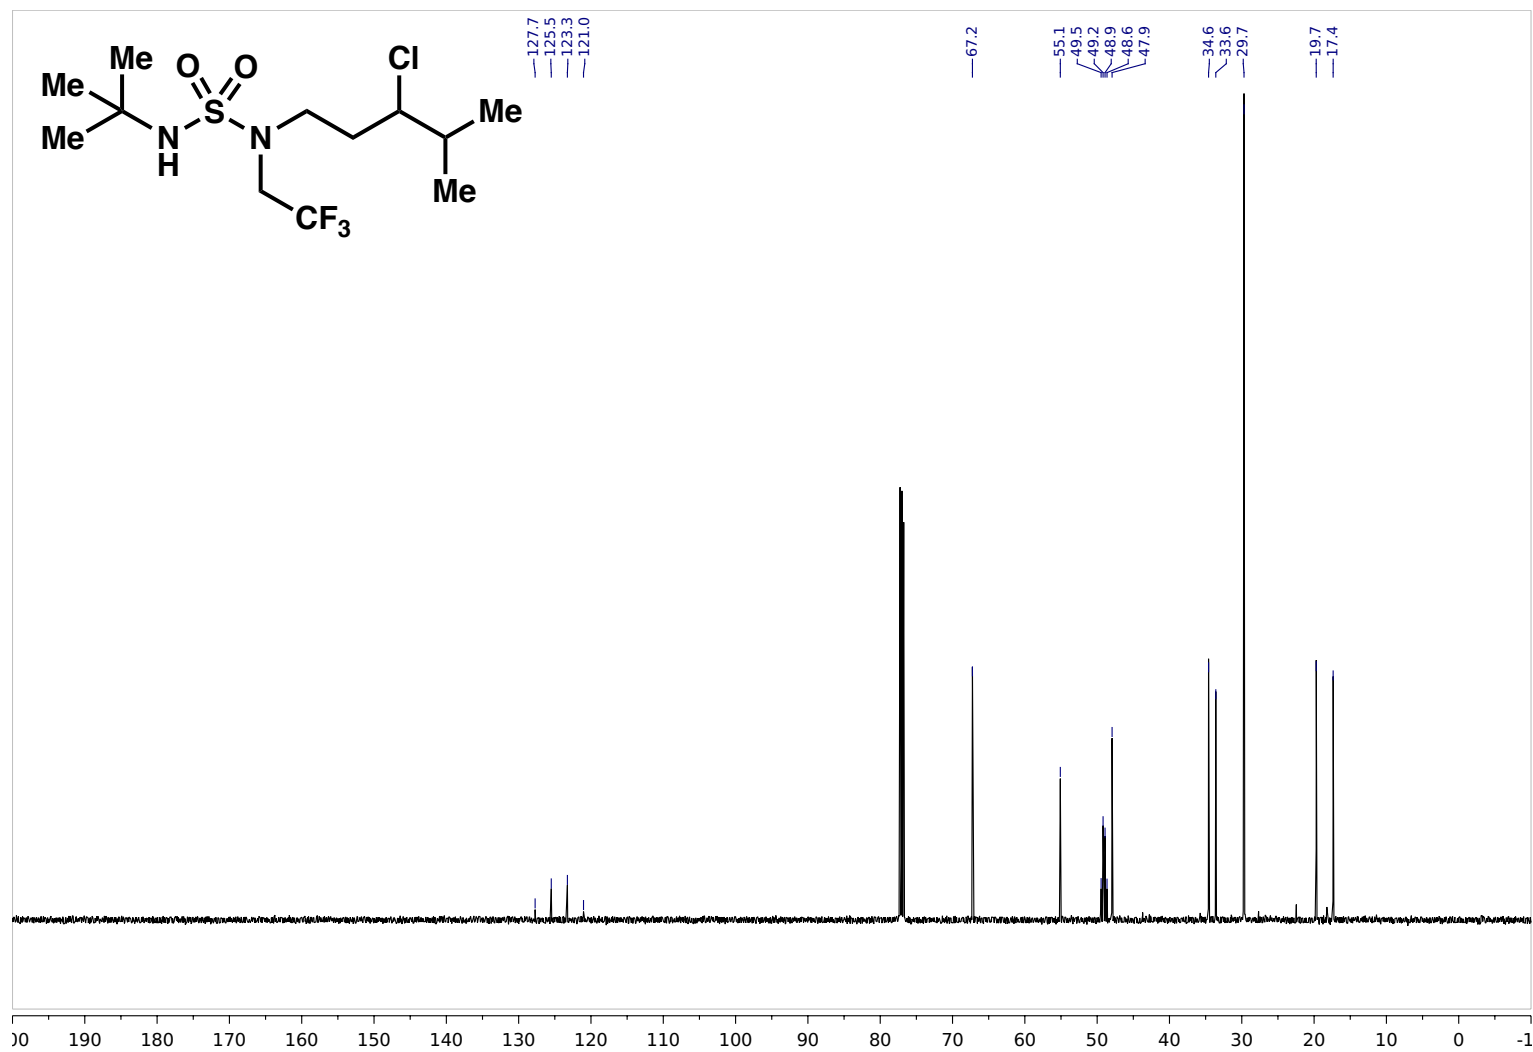

<sup>13</sup>C NMR (126 MHz, CDCl<sub>3</sub>) for *N*-*tert*-Butyl-*N'*-(3-chloro-4-methylpentyl)-*N''*-(2,2,2-trifluoroethyl)sulfamide (4p)

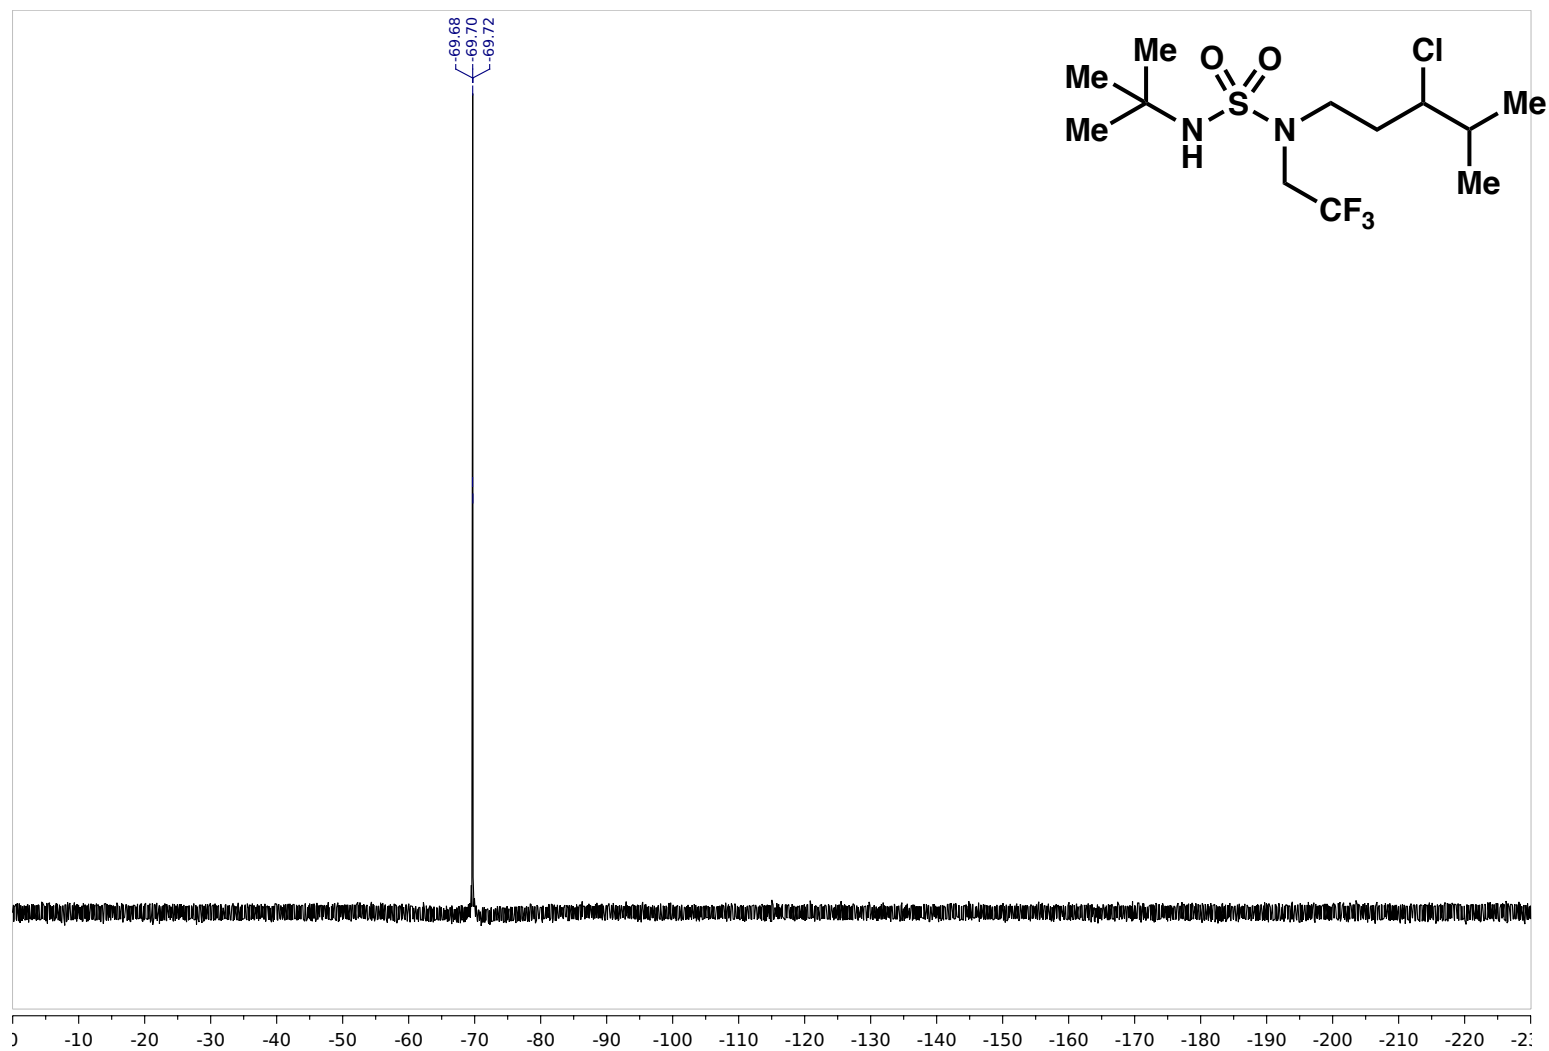

$^{19}\text{F}$  NMR (376 MHz,  $\text{CDCl}_3$ ) for *N*-*tert*-Butyl-*N'*-(3-chloro-4-methylpentyl)-*N''*-(2,2,2-trifluoroethyl)sulfamide (**4p**)

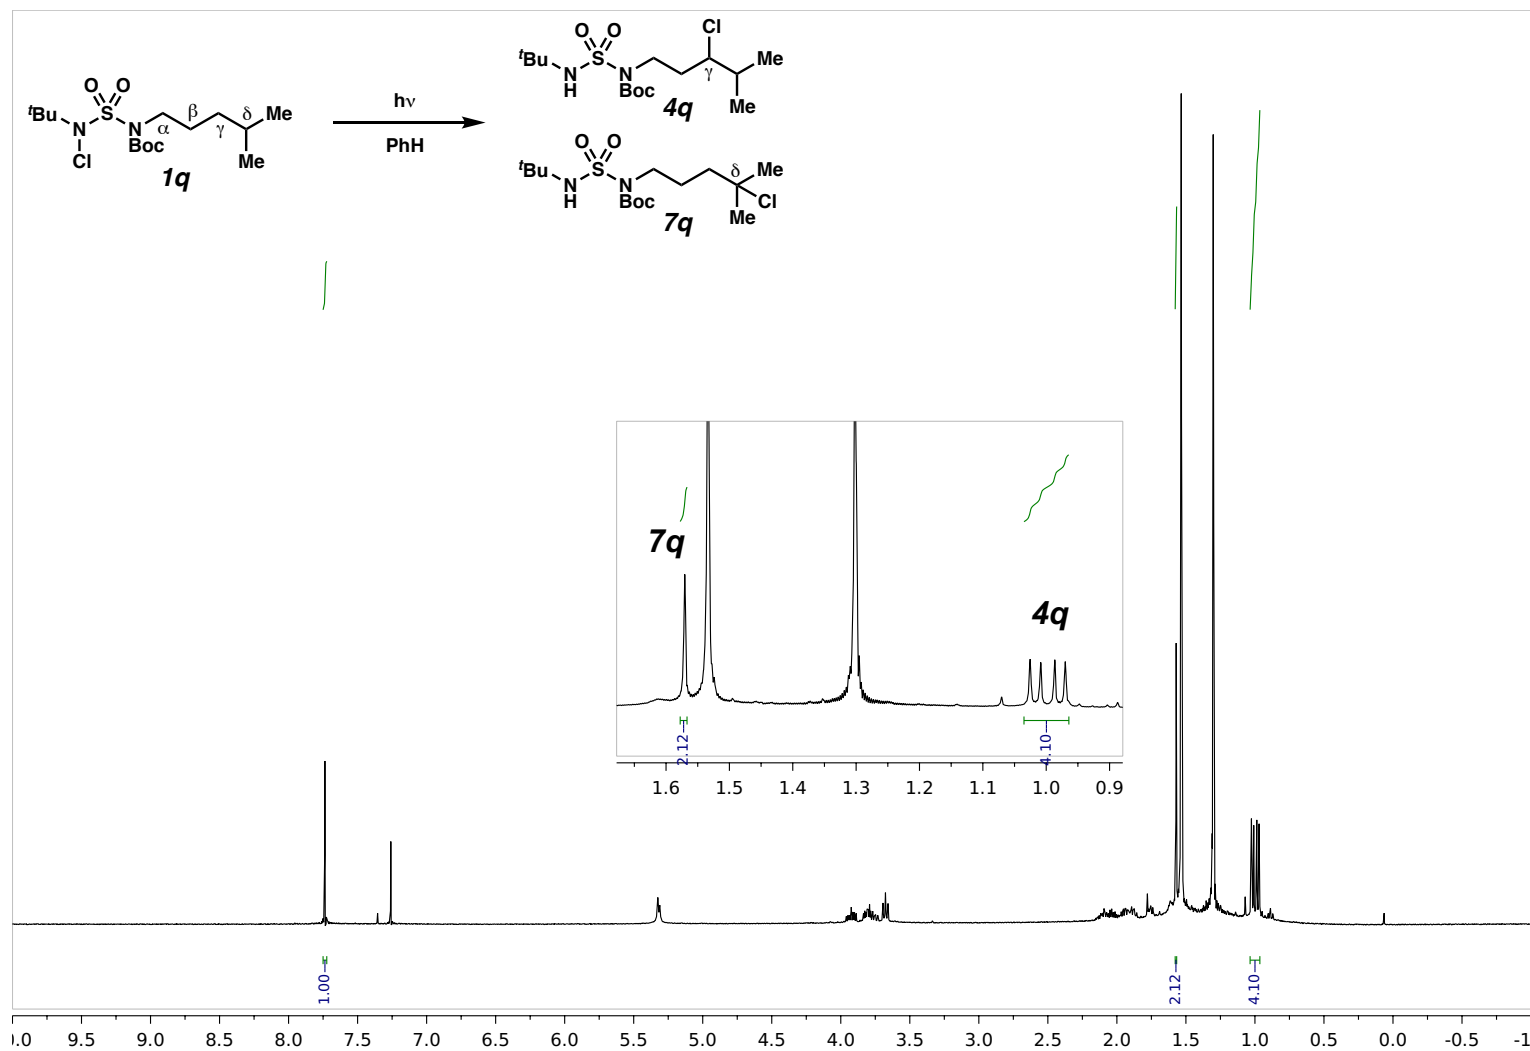

Crude <sup>1</sup>H NMR (500 MHz, CDCl<sub>3</sub>, 25s relaxation delay) for chlorine-transfer reaction of *N*-chlorosulfamide **1q**

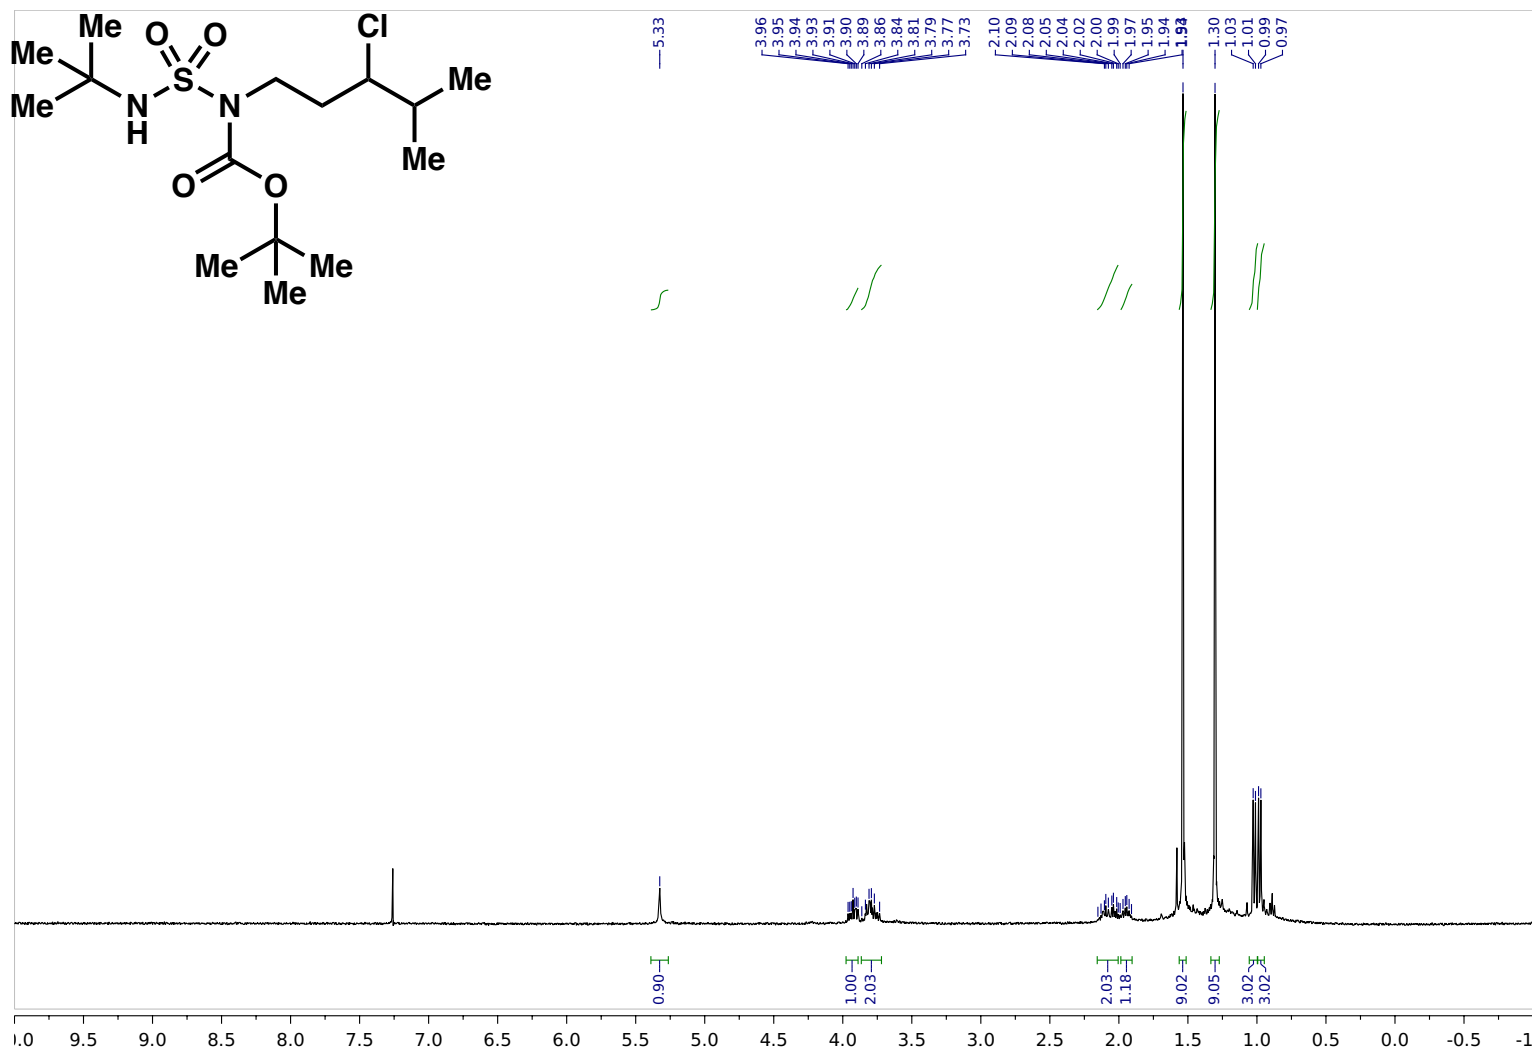

<sup>1</sup>H NMR (400 MHz, CDCl<sub>3</sub>) for *N*-*tert*-Butoxycarbonyl-*N'*-*tert*-butyl-*N*-(3-chloro-4-methylpentyl)sulfamide (**4q**)

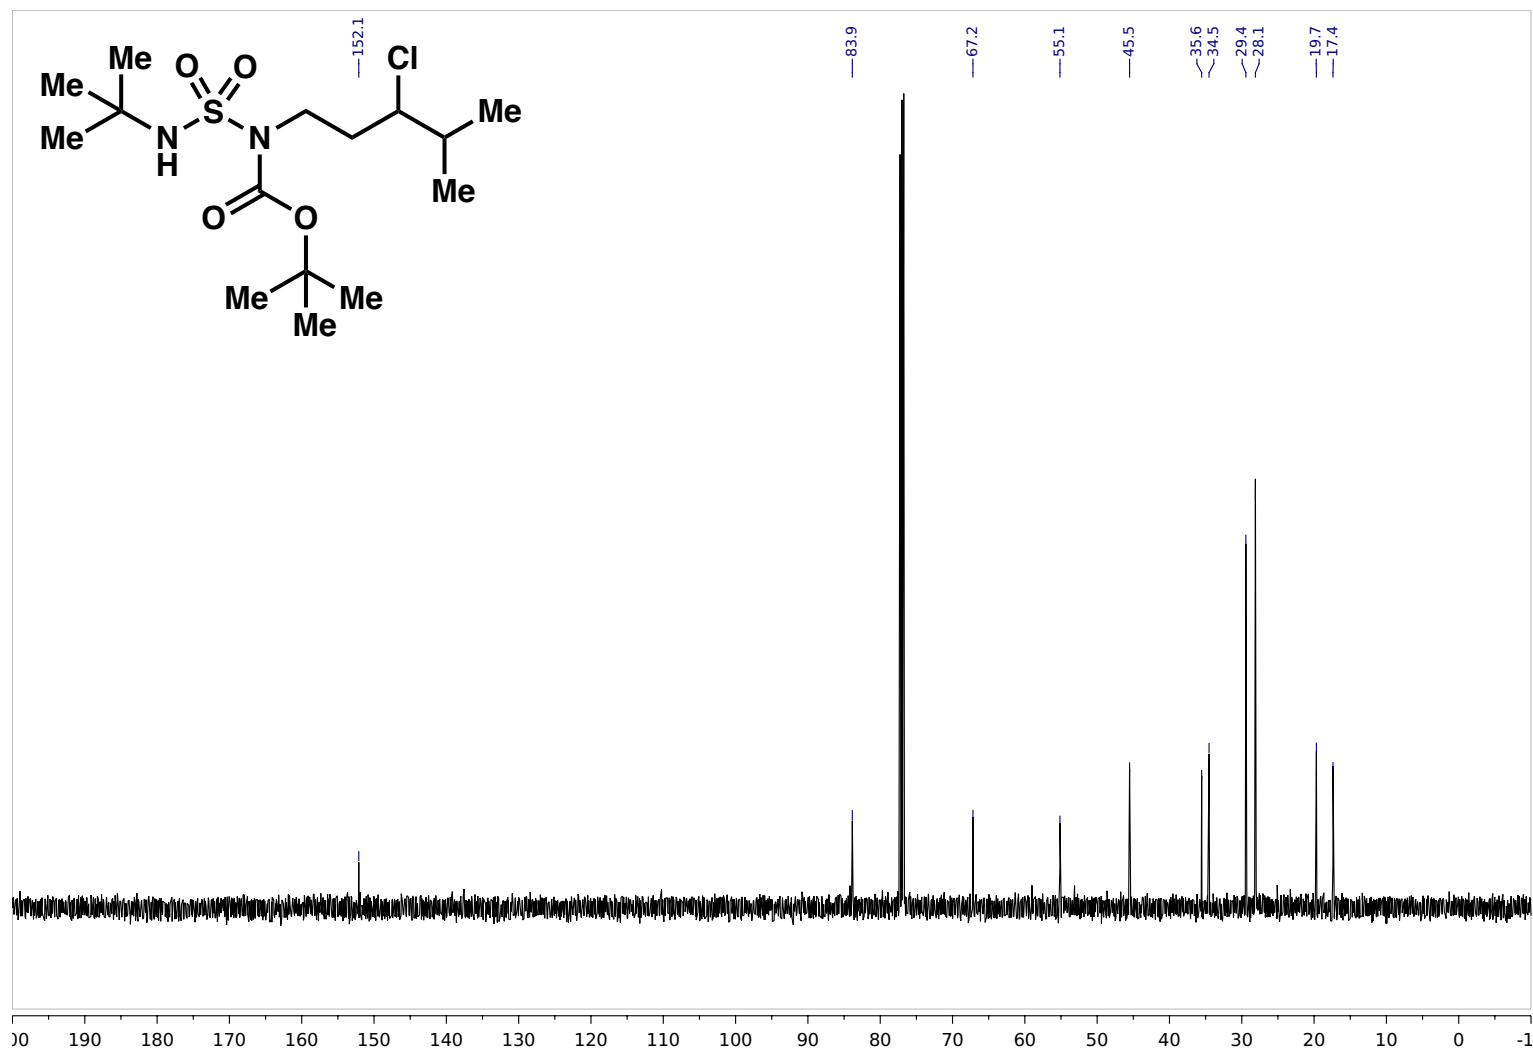

<sup>13</sup>C NMR (126 MHz, CDCl<sub>3</sub>) for *N*-*tert*-Butoxycarbonyl-*N'*-*tert*-butyl-*N*-(3-chloro-4-methylpentyl)sulfamide (**4q**)

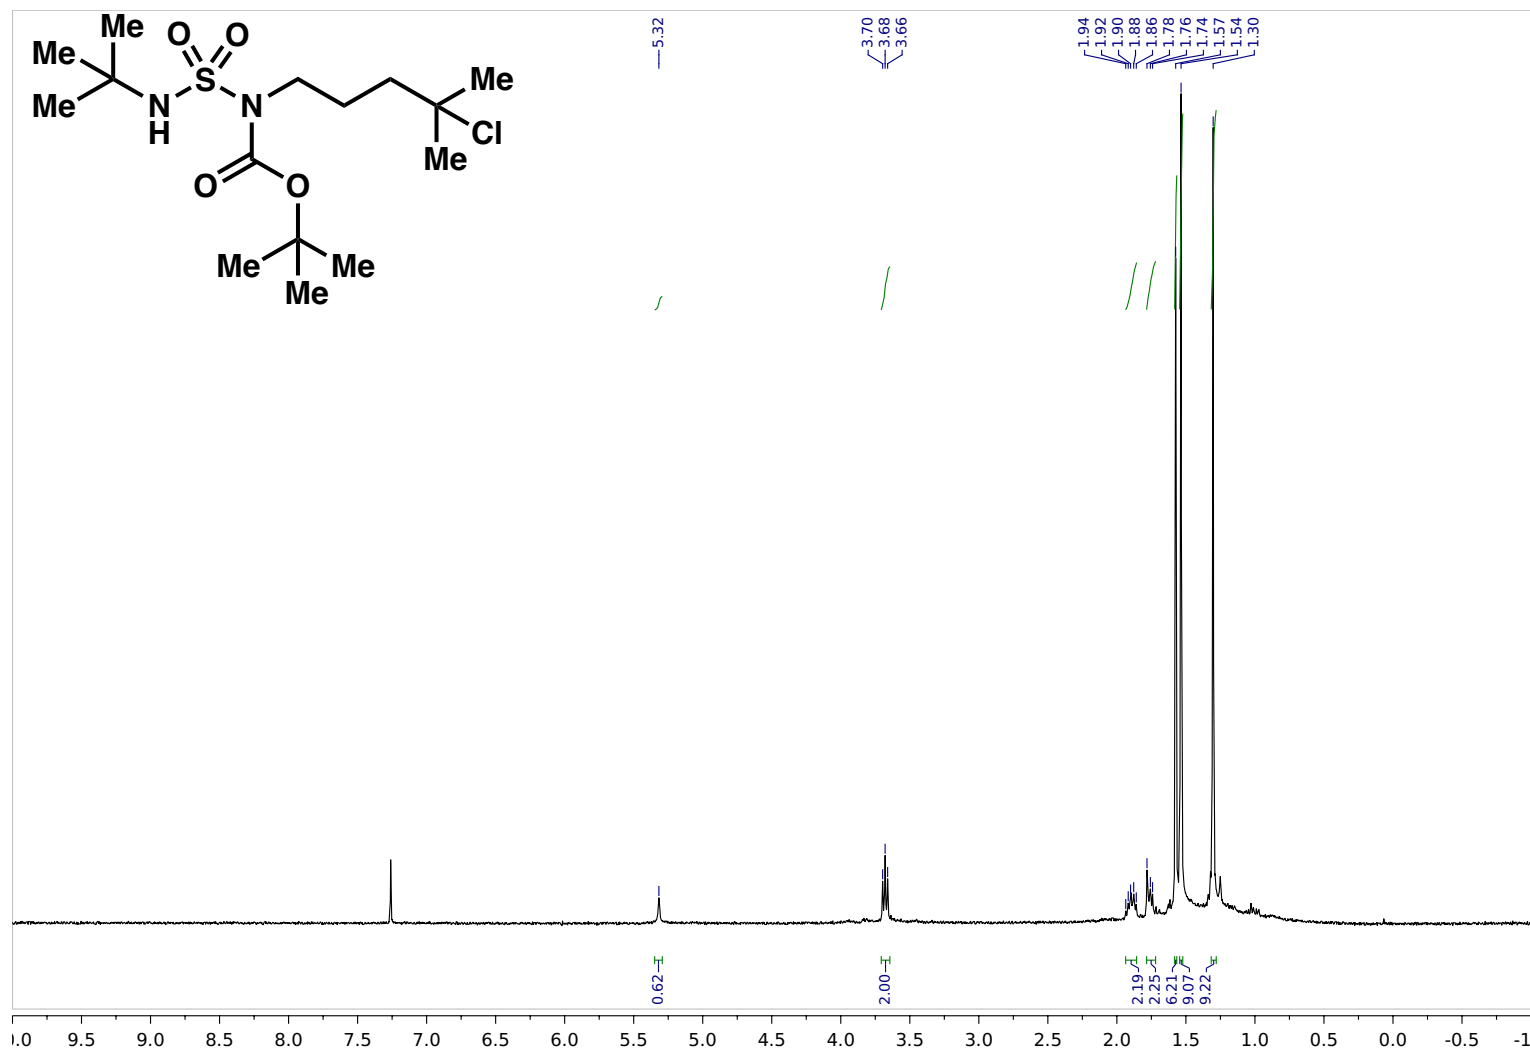

<sup>1</sup>H NMR (400 MHz, CDCl<sub>3</sub>) for *N*-*tert*-Butoxycarbonyl-*N'*-*tert*-butyl-*N*-(4-chloro-4-methylpentyl)sulfamide (7q)



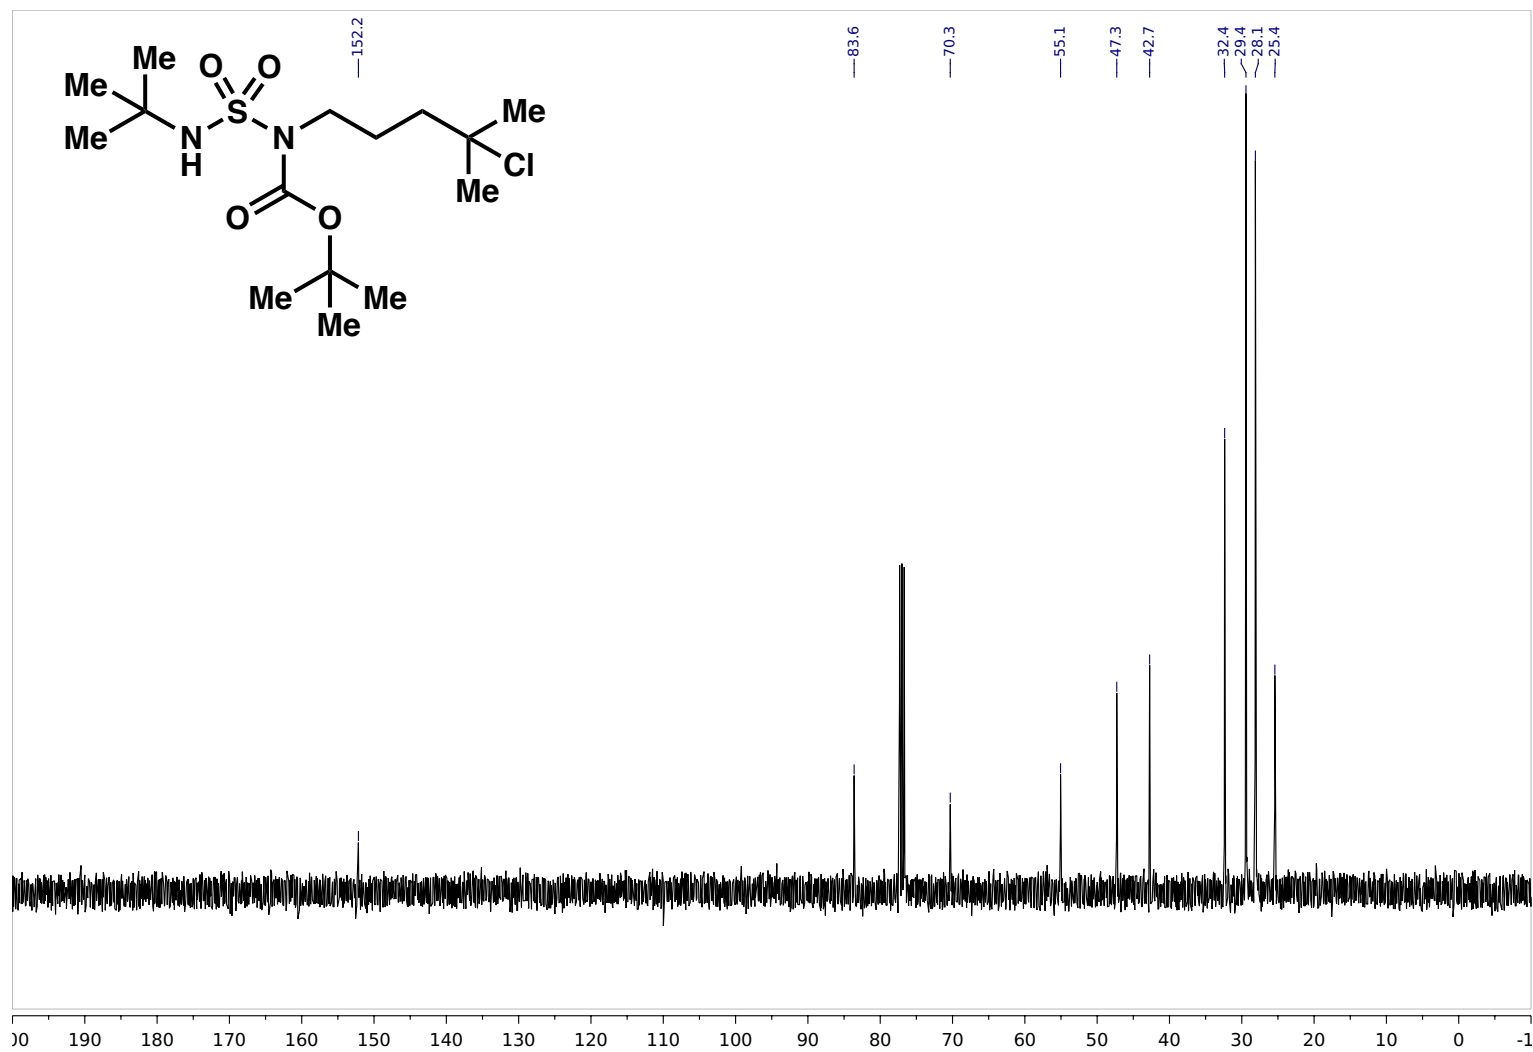

<sup>13</sup>C NMR (101 MHz, CDCl<sub>3</sub>) for *N*-*tert*-Butoxycarbonyl-*N'*-*tert*-butyl-*N*-(4-chloro-4-methylpentyl)sulfamide (7q)

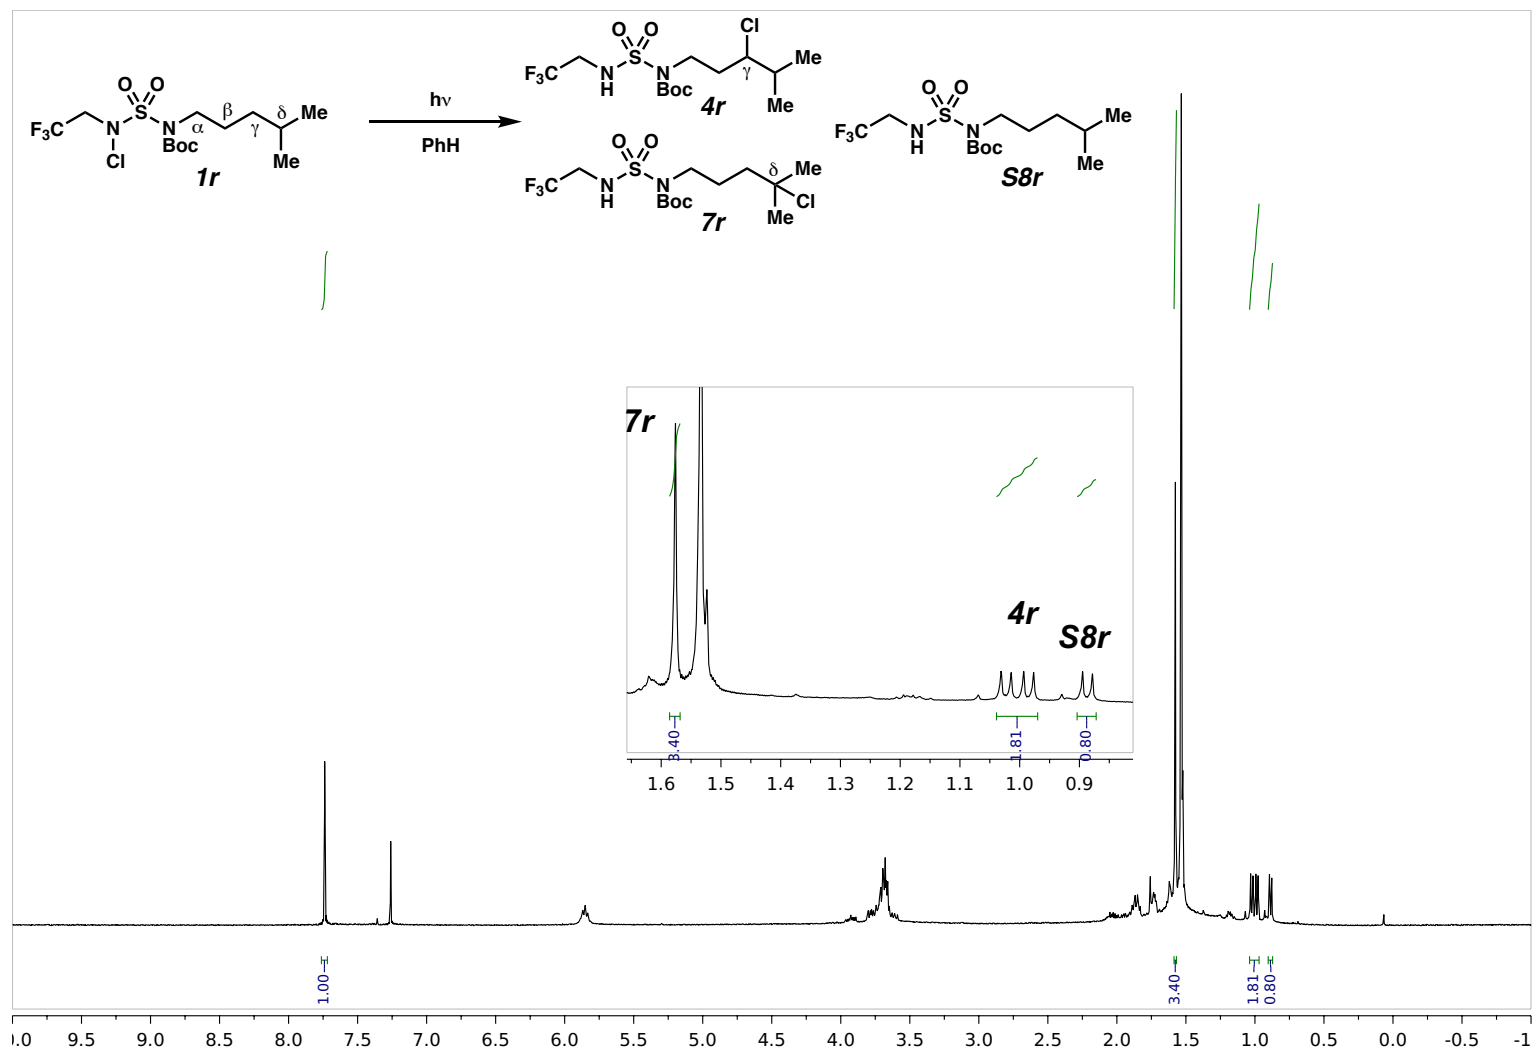

Crude  $^1\text{H}$  NMR (500 MHz,  $\text{CDCl}_3$ , 25s relaxation delay) for chlorine-transfer reaction of *N*-chlorosulfamide **1r**

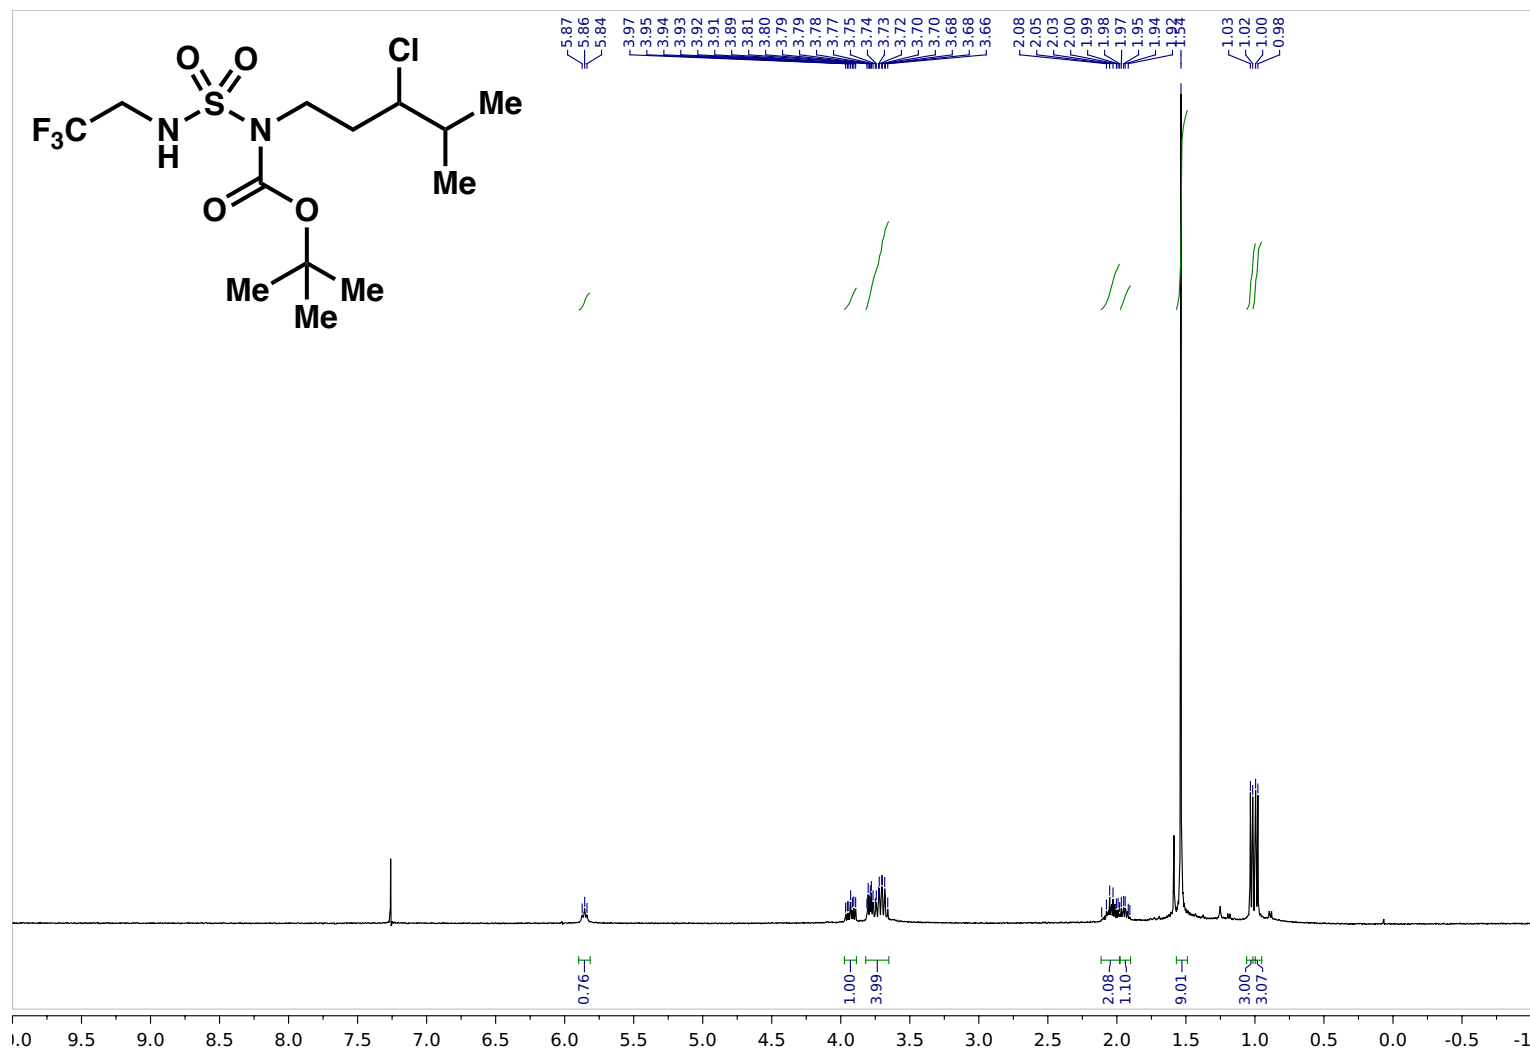

<sup>1</sup>H NMR (400 MHz, CDCl<sub>3</sub>) for *N*-tert-Butoxycarbonyl-*N*-(3-chloro-4-methylpentyl)-*N'*-(2,2,2-trifluoroethyl)sulfamide (**4r**)

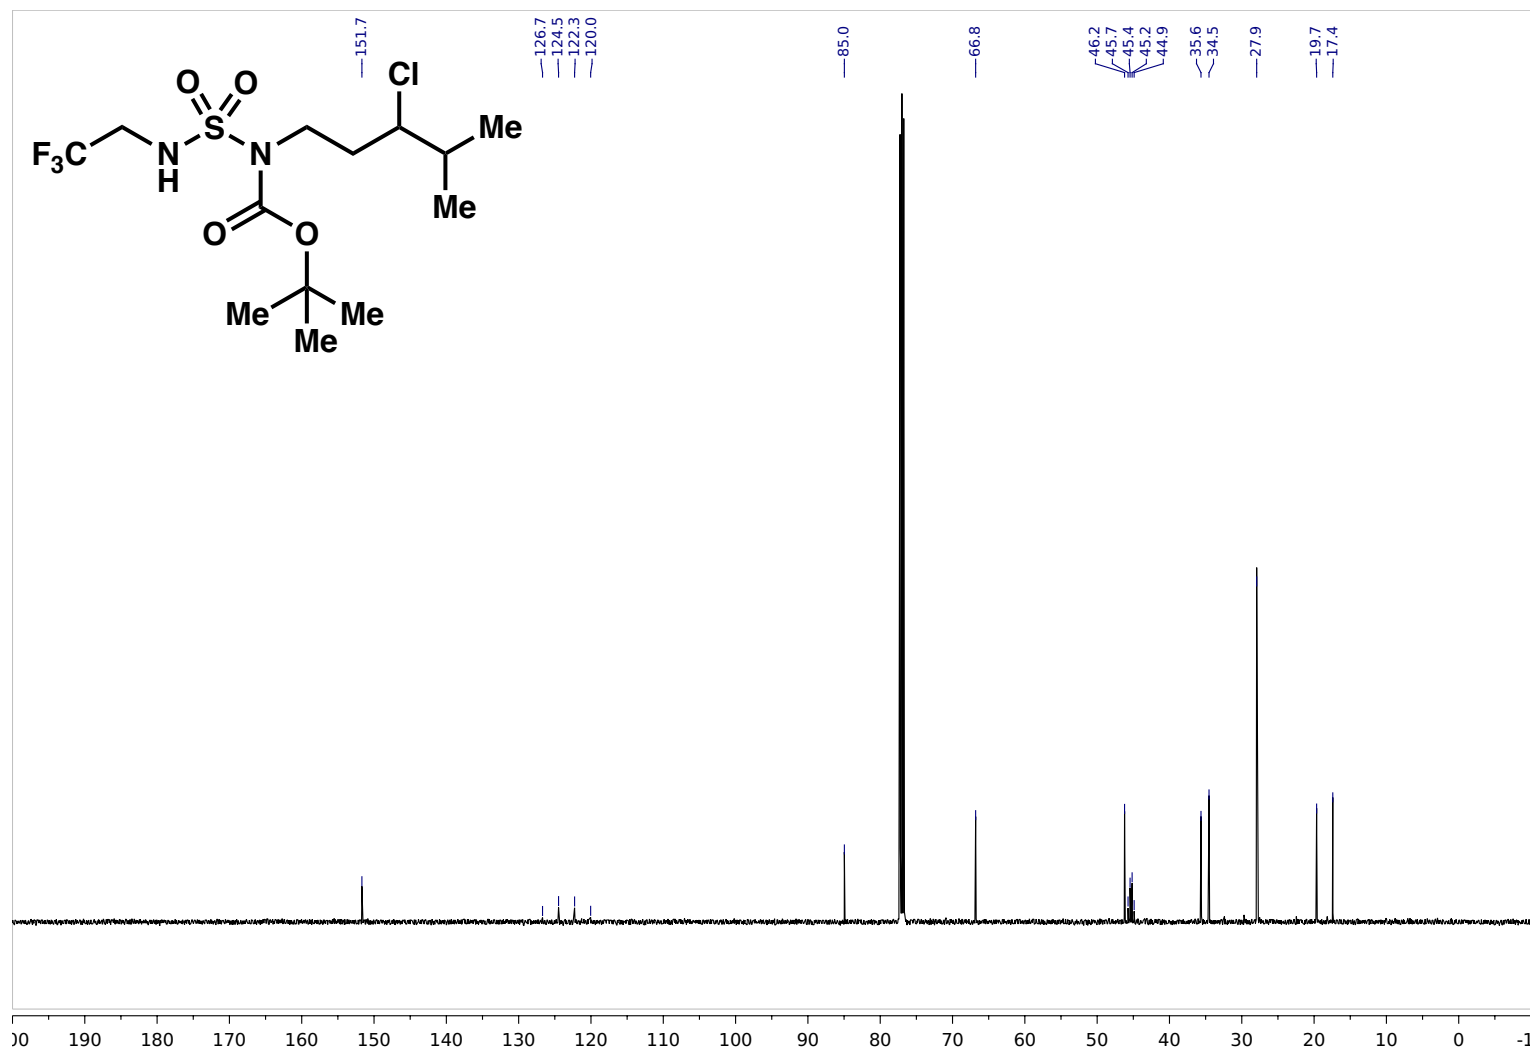

<sup>13</sup>C NMR (126 MHz, CDCl<sub>3</sub>) for *N*-tert-butoxycarbonyl-*N*-(3-chloro-4-methylpentyl)-*N'*-(2,2,2-trifluoroethyl)sulfamide (4r)

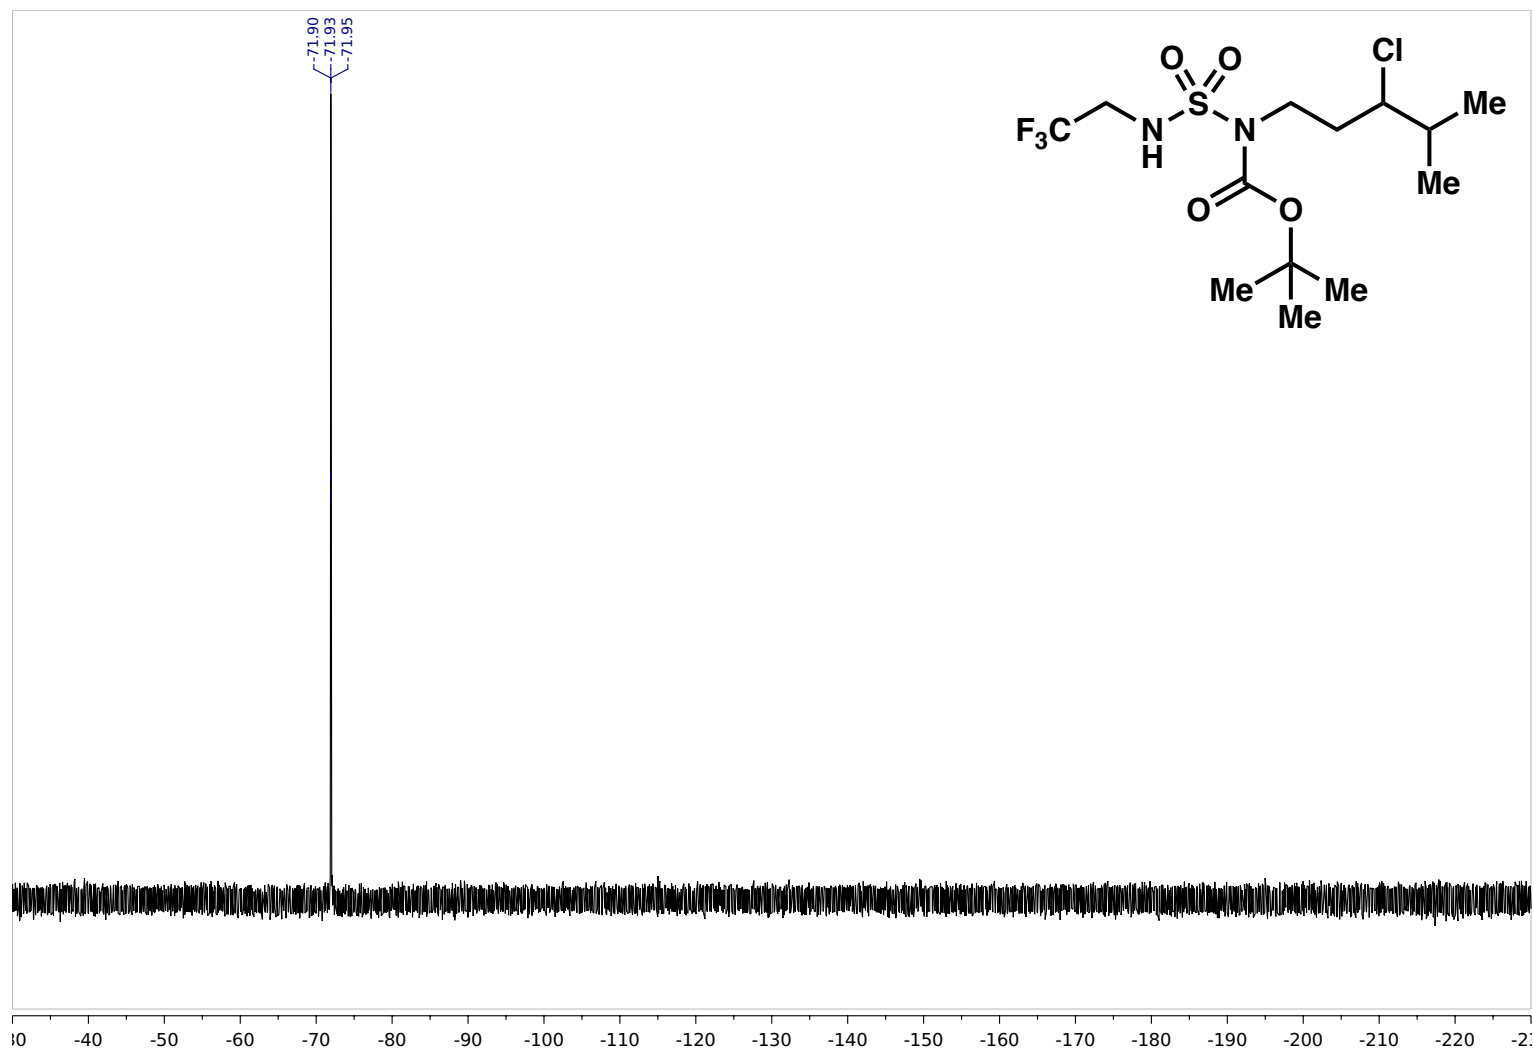

$^{19}\text{F}$  NMR (376 MHz,  $\text{CDCl}_3$ ) for *N*-*tert*-Butoxycarbonyl-*N*-(3-chloro-4-methylpentyl)-*N'*-(2,2,2-trifluoroethyl)sulfamide (**4r**)

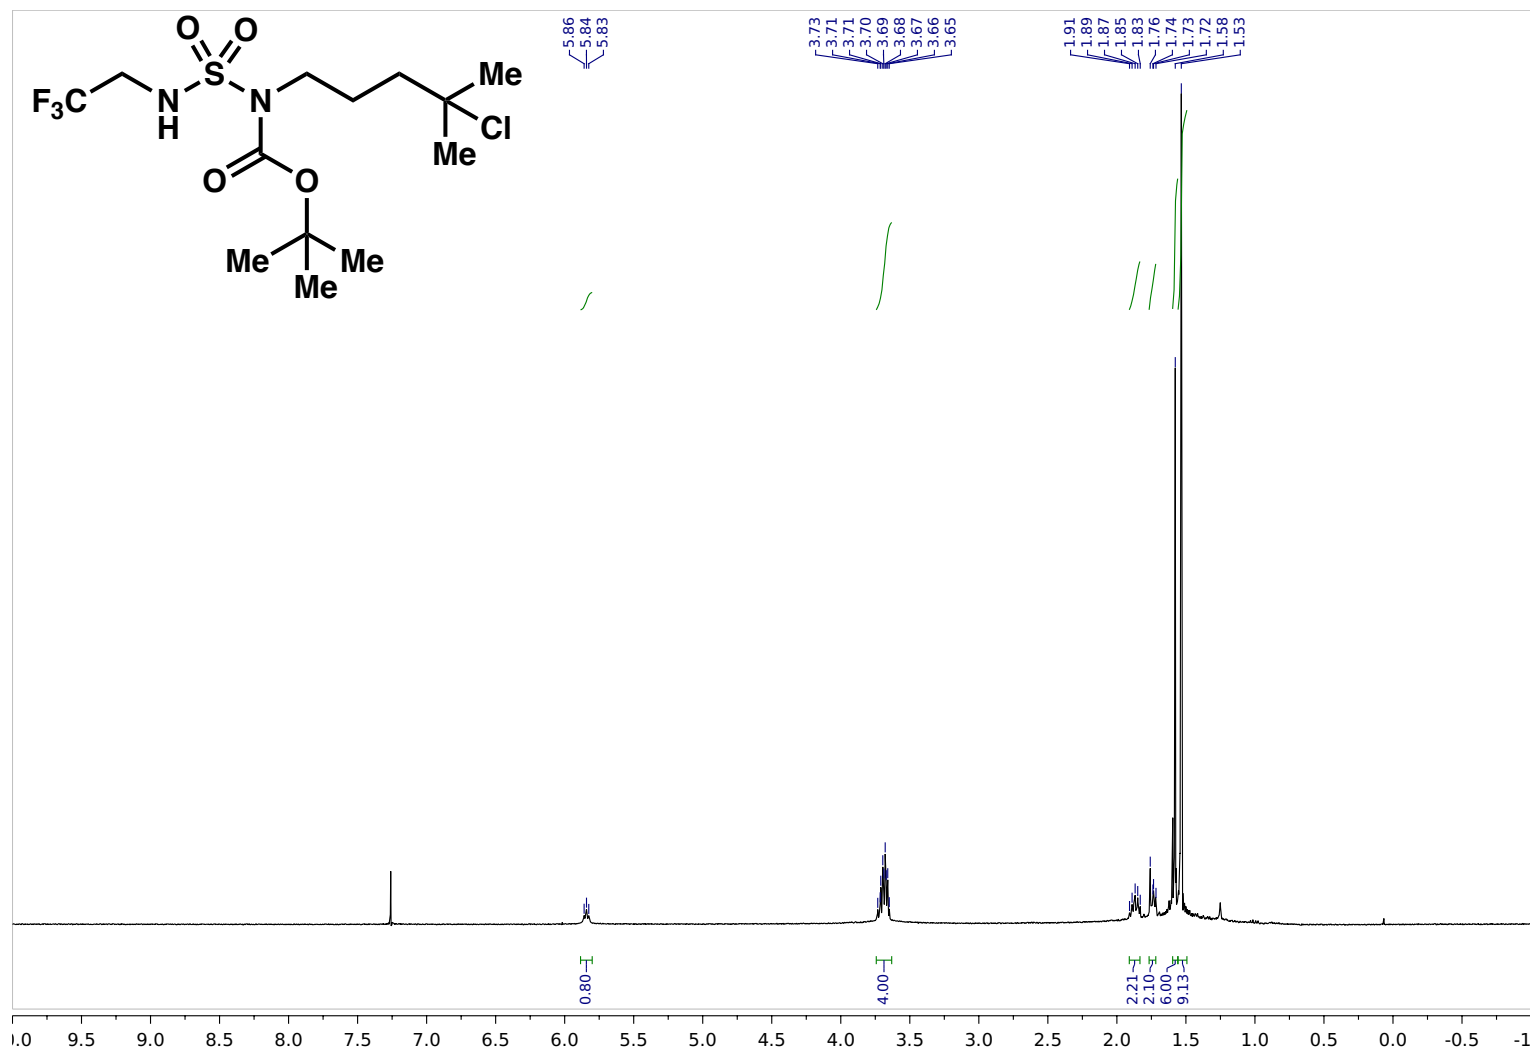

<sup>1</sup>H NMR (400 MHz, CDCl<sub>3</sub>) for *N*-tert-Butoxycarbonyl-*N*-(4-chloro-4-methylpentyl)-*N'*-(2,2,2-trifluoroethyl)sulfamide (**7r**)

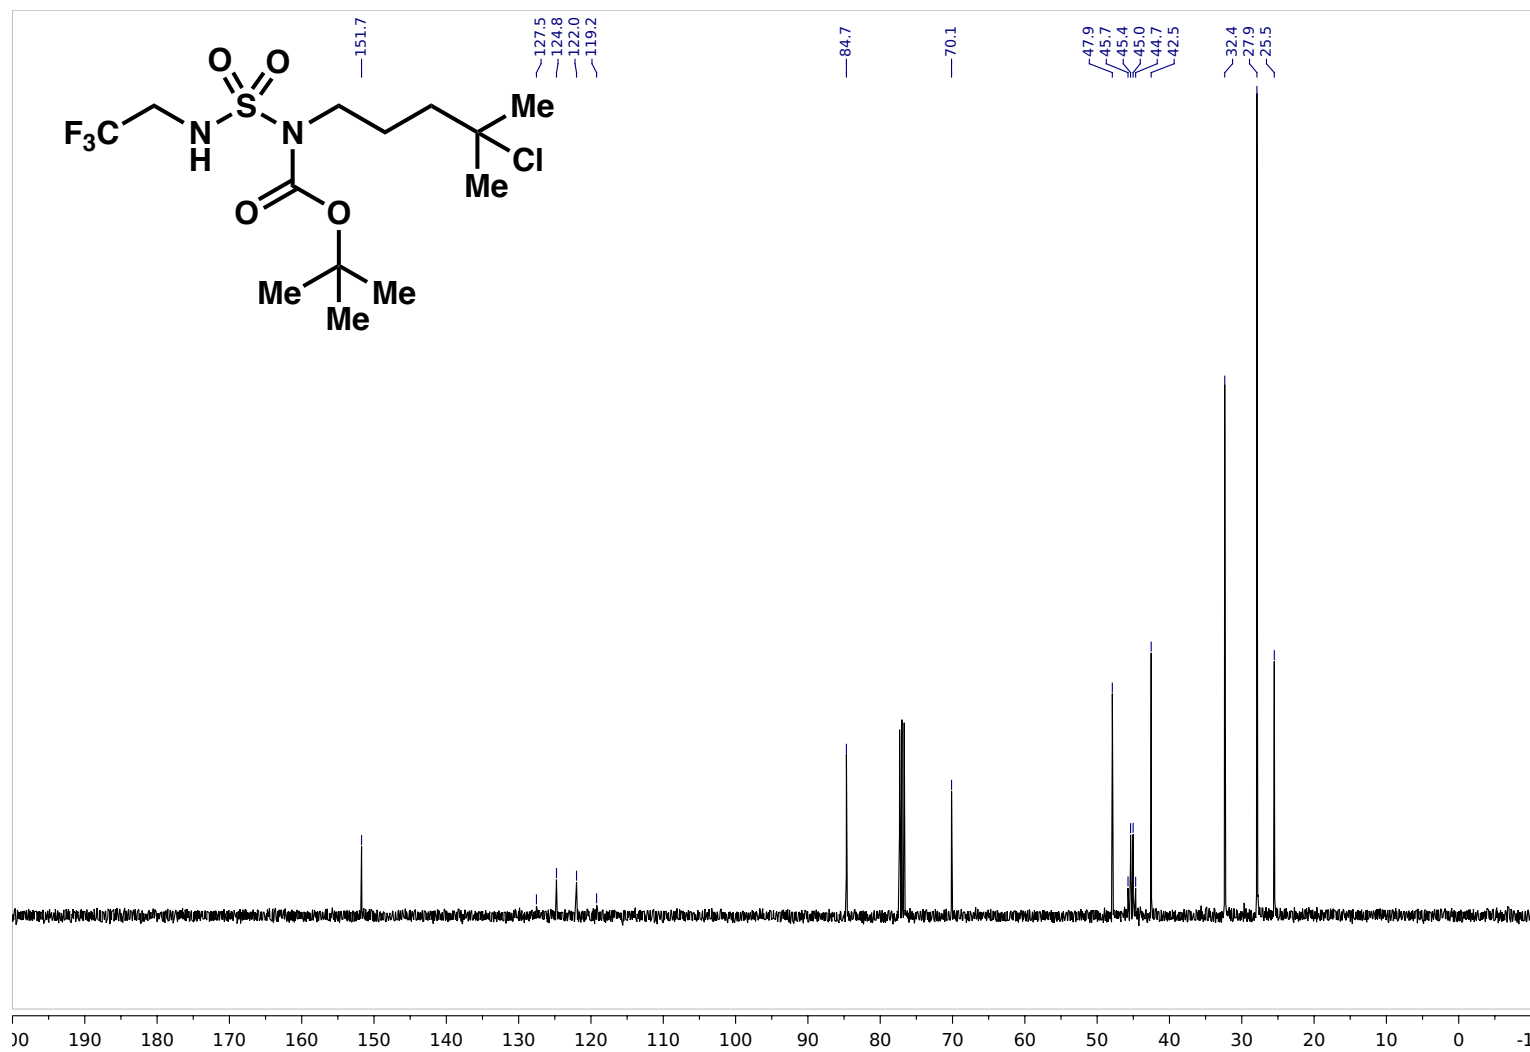

<sup>13</sup>C NMR (101 MHz, CDCl<sub>3</sub>) for *N*-*tert*-Butoxycarbonyl-*N*-(4-chloro-4-methylpentyl)-*N'*-(2,2,2-trifluoroethyl)sulfamide (**7r**)

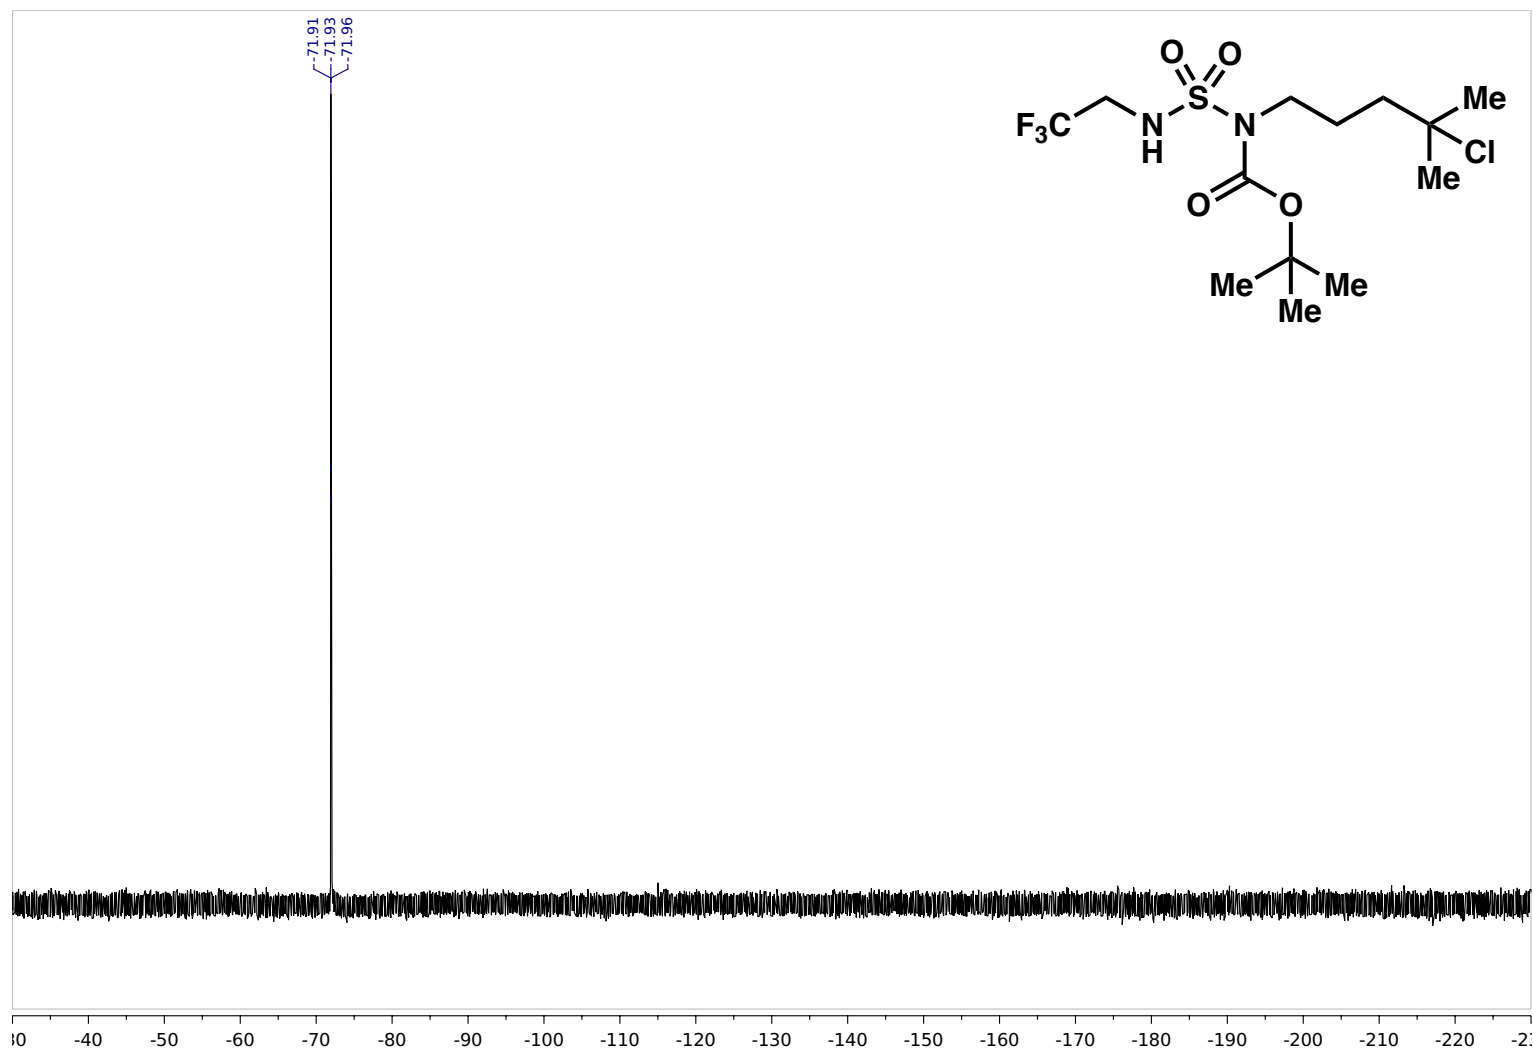

$^{19}\text{F}$  NMR (376 MHz,  $\text{CDCl}_3$ ) for *N*-*tert*-Butoxycarbonyl-*N*-(4-chloro-4-methylpentyl)-*N'*-(2,2,2-trifluoroethyl)sulfamide (**7r**)



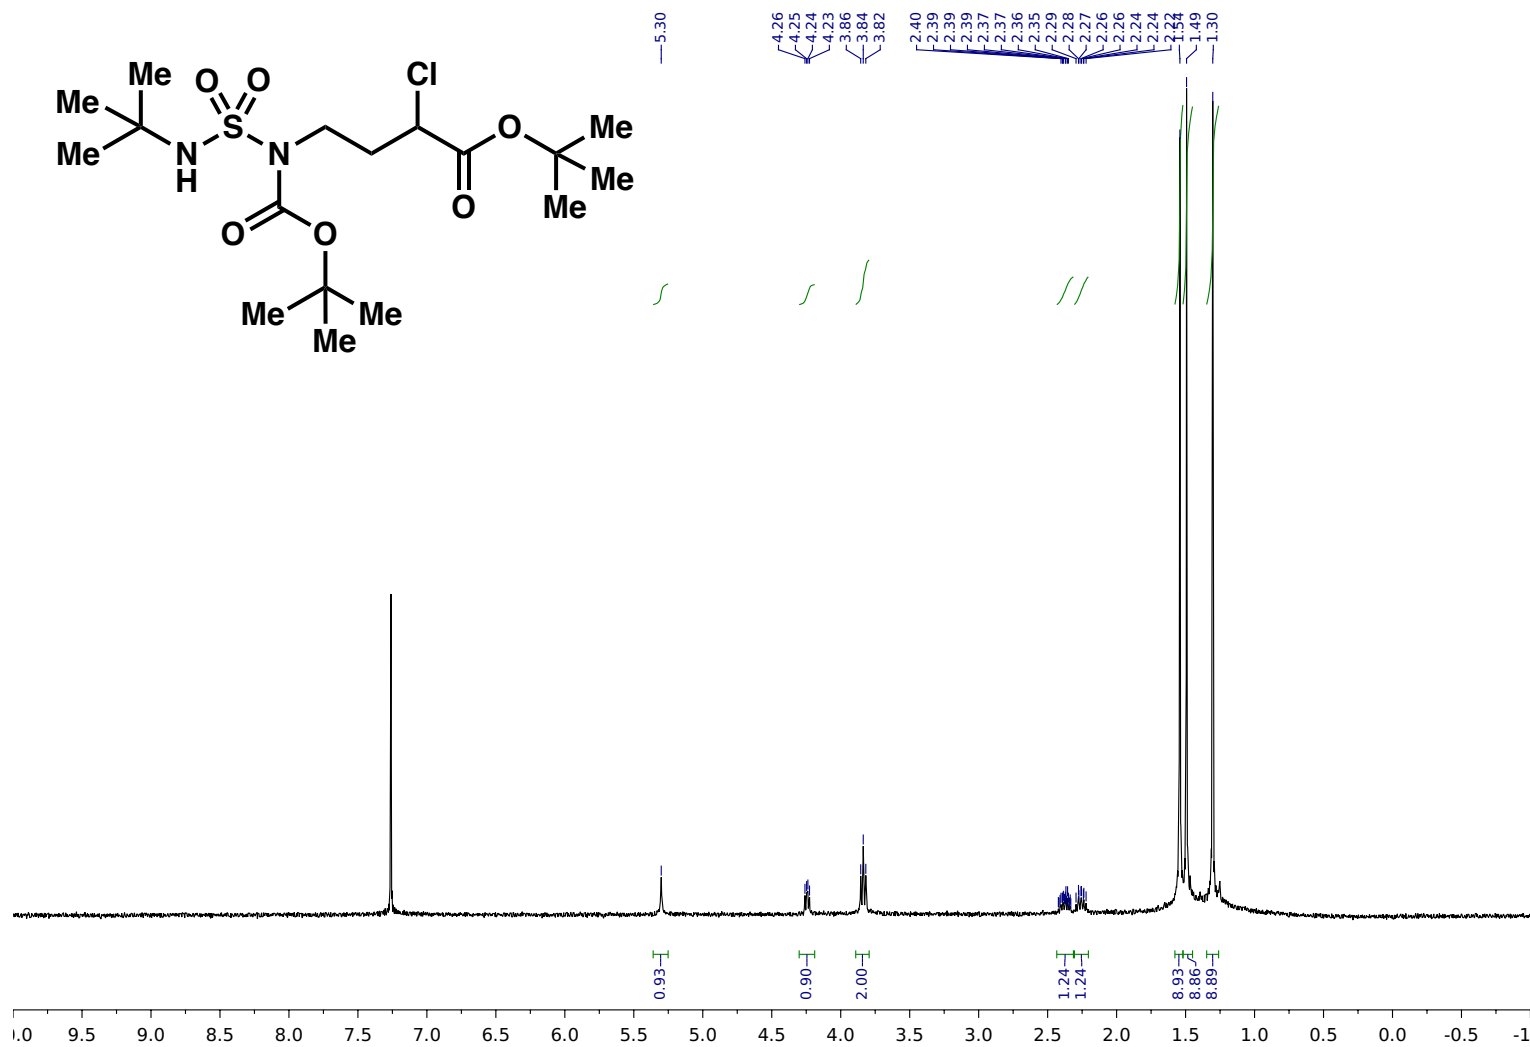

<sup>1</sup>H NMR (400 MHz, CDCl<sub>3</sub>) for *N*-*tert*-butoxycarbonyl-*N'*-*tert*-butyl-*N*-(*tert*-butyl 2-chlorobutano-4-yl)sulfamide (**S10t**)

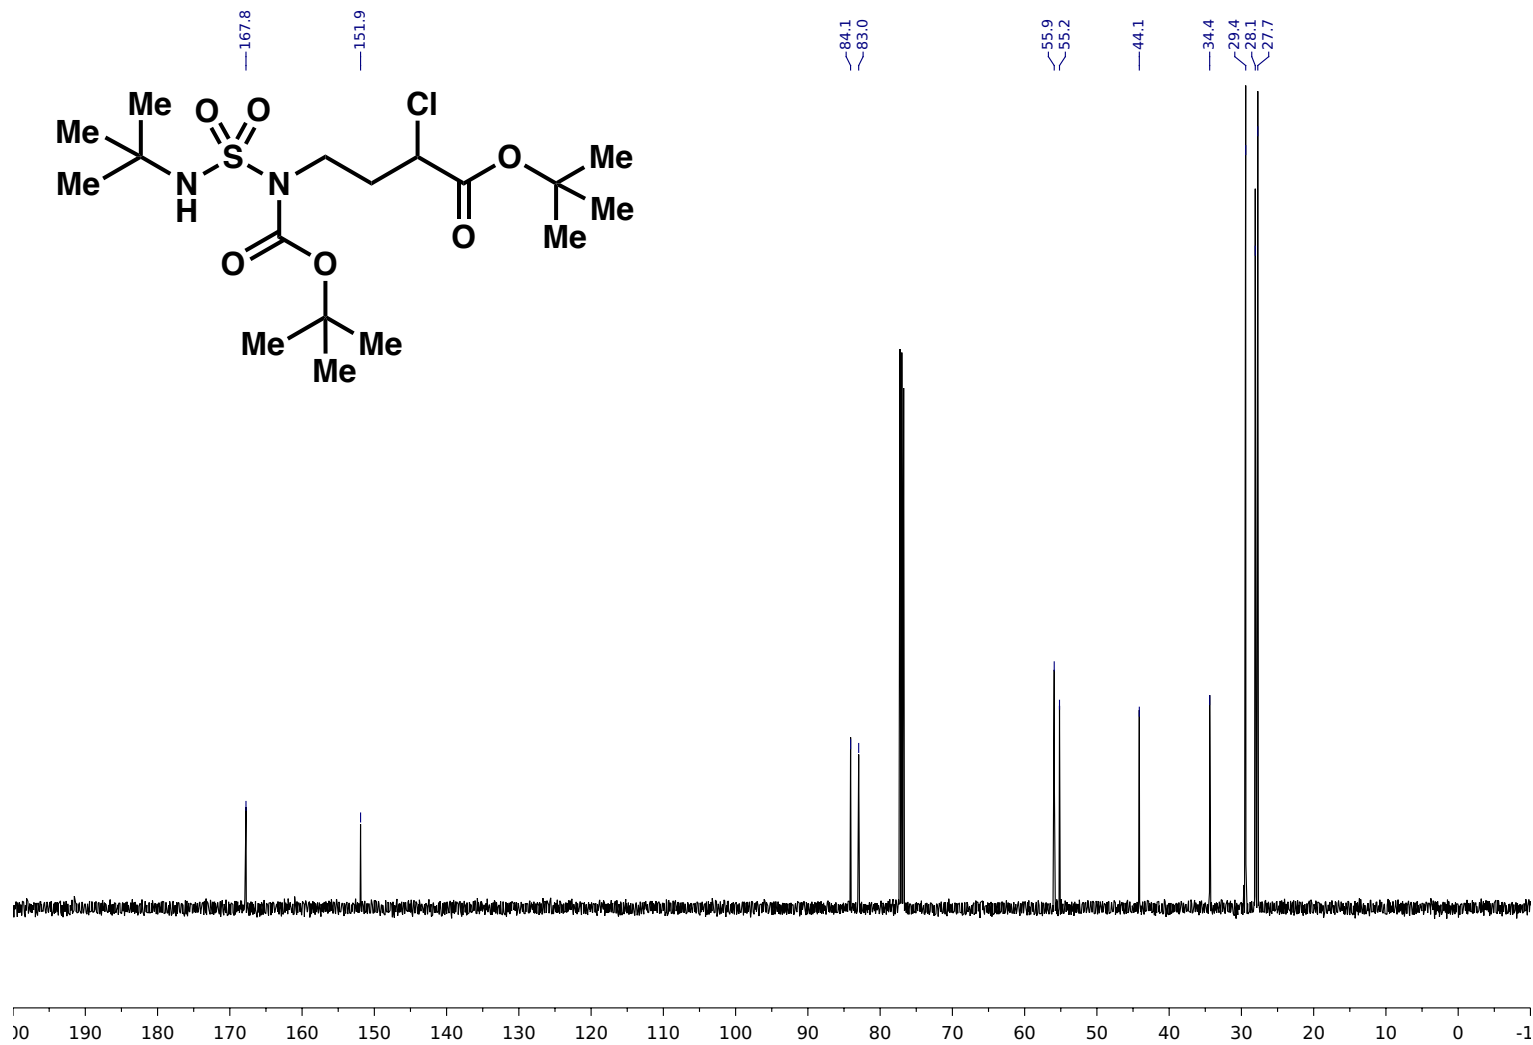

<sup>13</sup>C NMR (126 MHz, CDCl<sub>3</sub>) for *N*-*tert*-butoxycarbonyl-*N'*-*tert*-butyl-*N*-(*tert*-butyl 2-chlorobutano-4-yl)sulfamide (**S10t**)

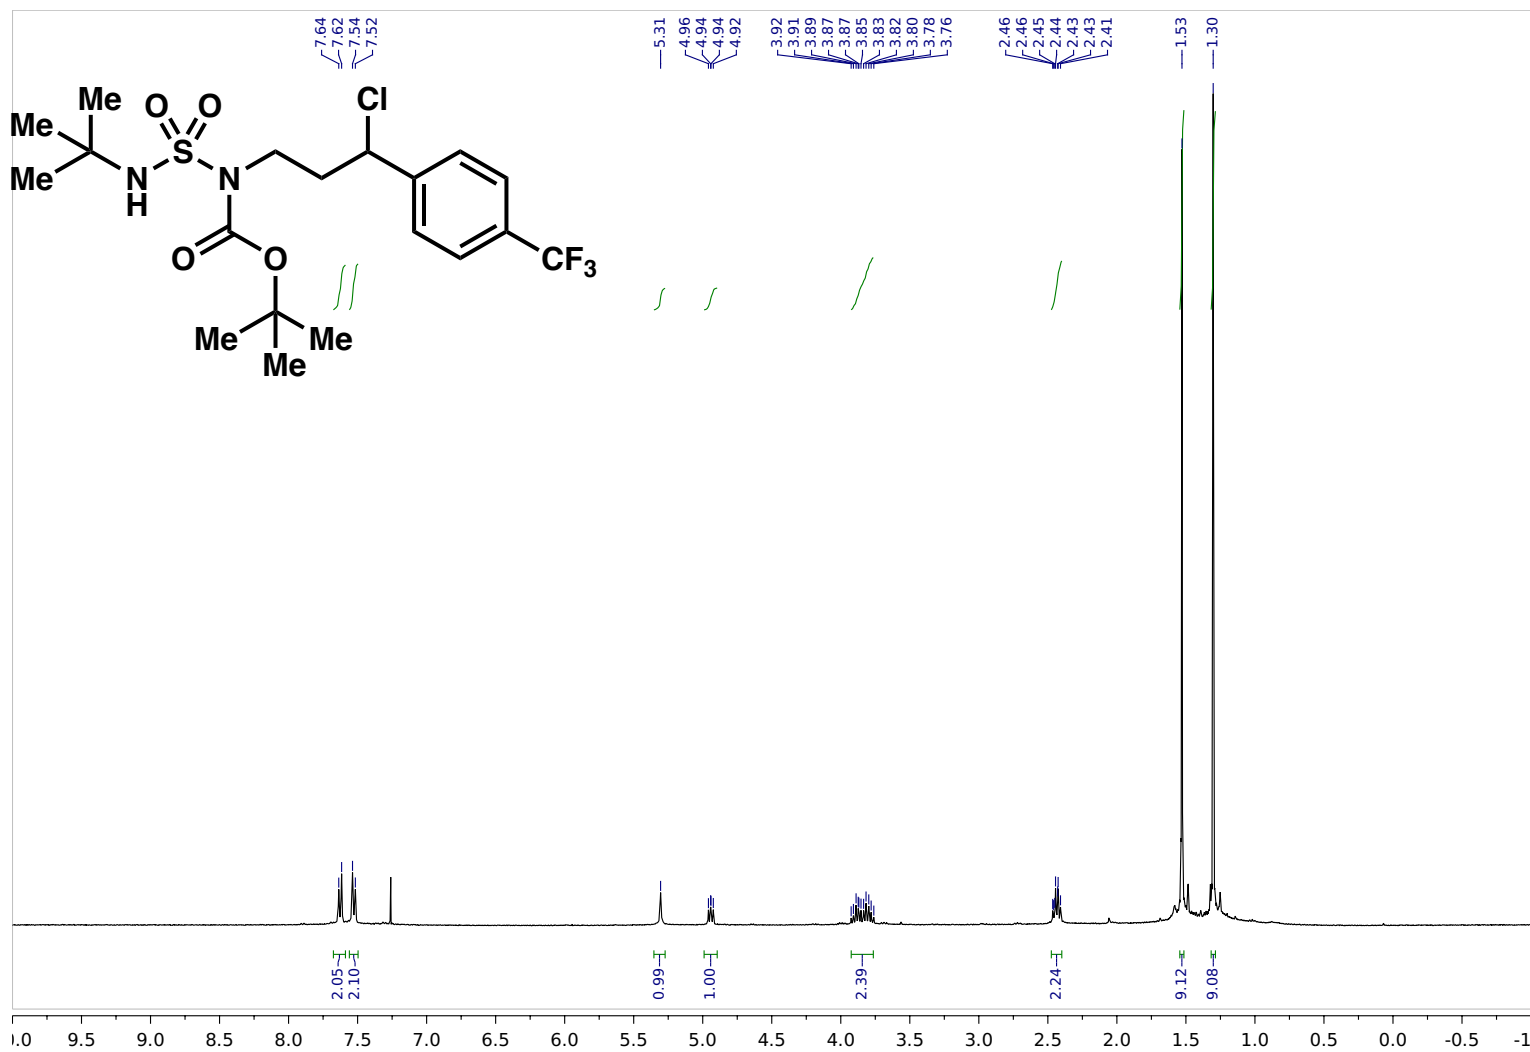

<sup>1</sup>H NMR (400 MHz, CDCl<sub>3</sub>) for *N*-*tert*-butoxycarbonyl-*N'*-*tert*-butyl-*N*-(3-chloro-3-((4-trifluoromethyl)phenyl)prop-1-yl)sulfamide (S10u)

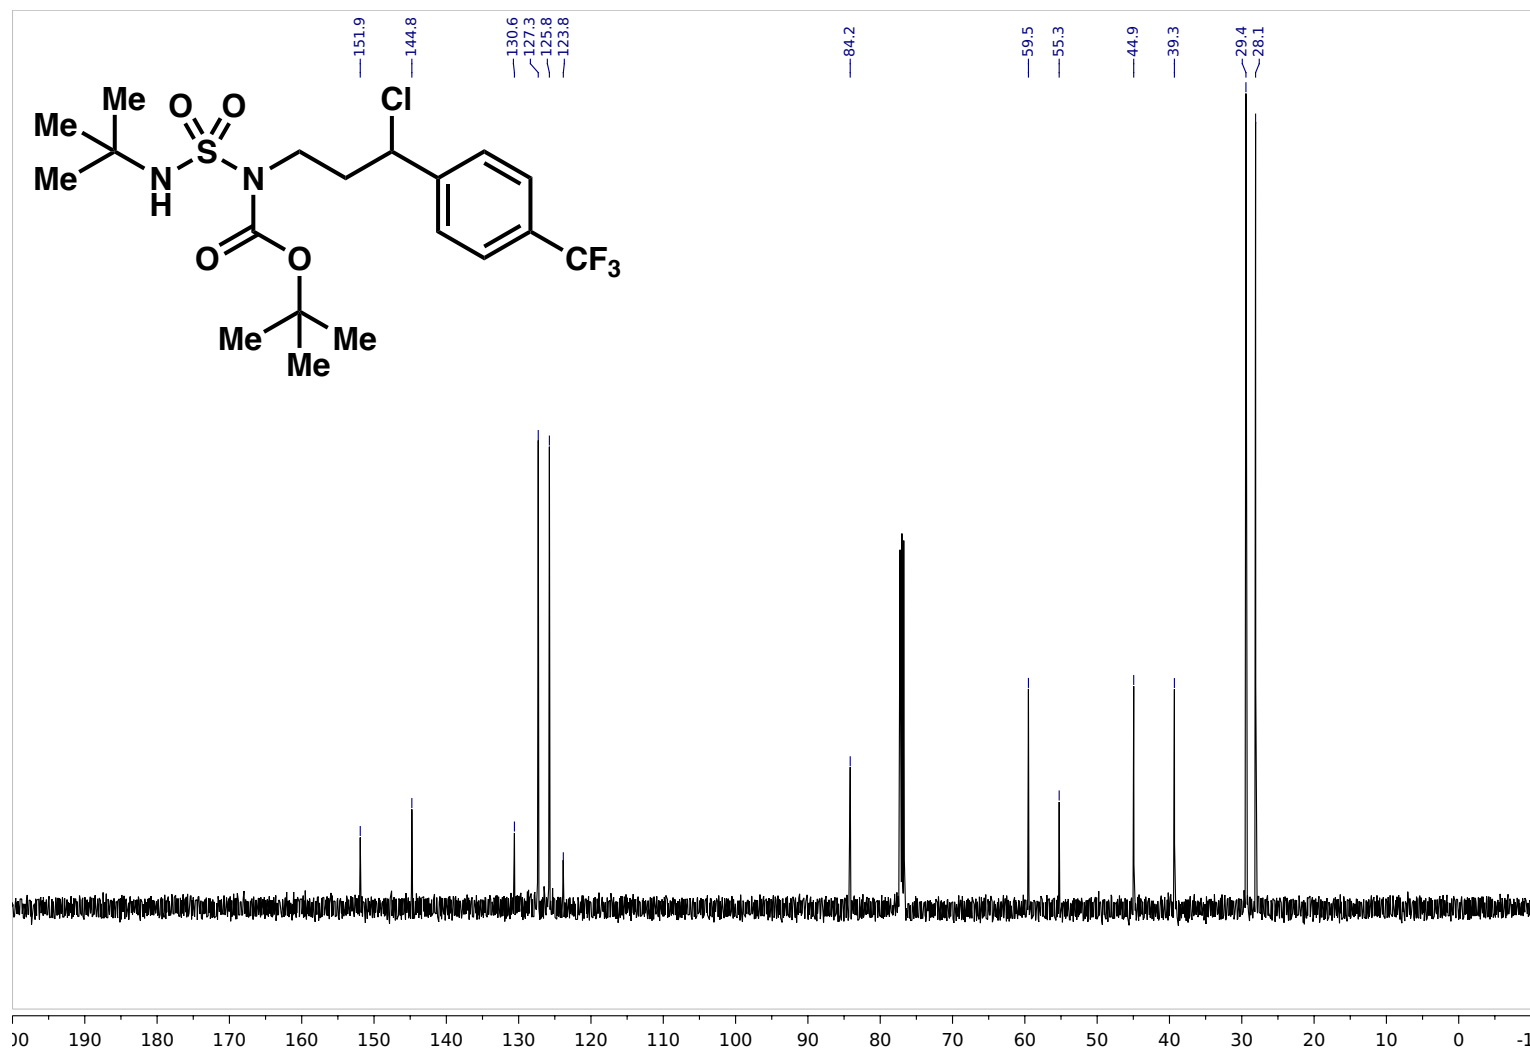

<sup>13</sup>C NMR (126 MHz, CDCl<sub>3</sub>, <sup>1</sup>H and <sup>19</sup>F decoupled) for *N*-tert-butoxycarbonyl-*N'*-tert-butyl-*N*-(3-chloro-3-(4-trifluoromethylphenyl)prop-1-yl)sulfamide (S10u)

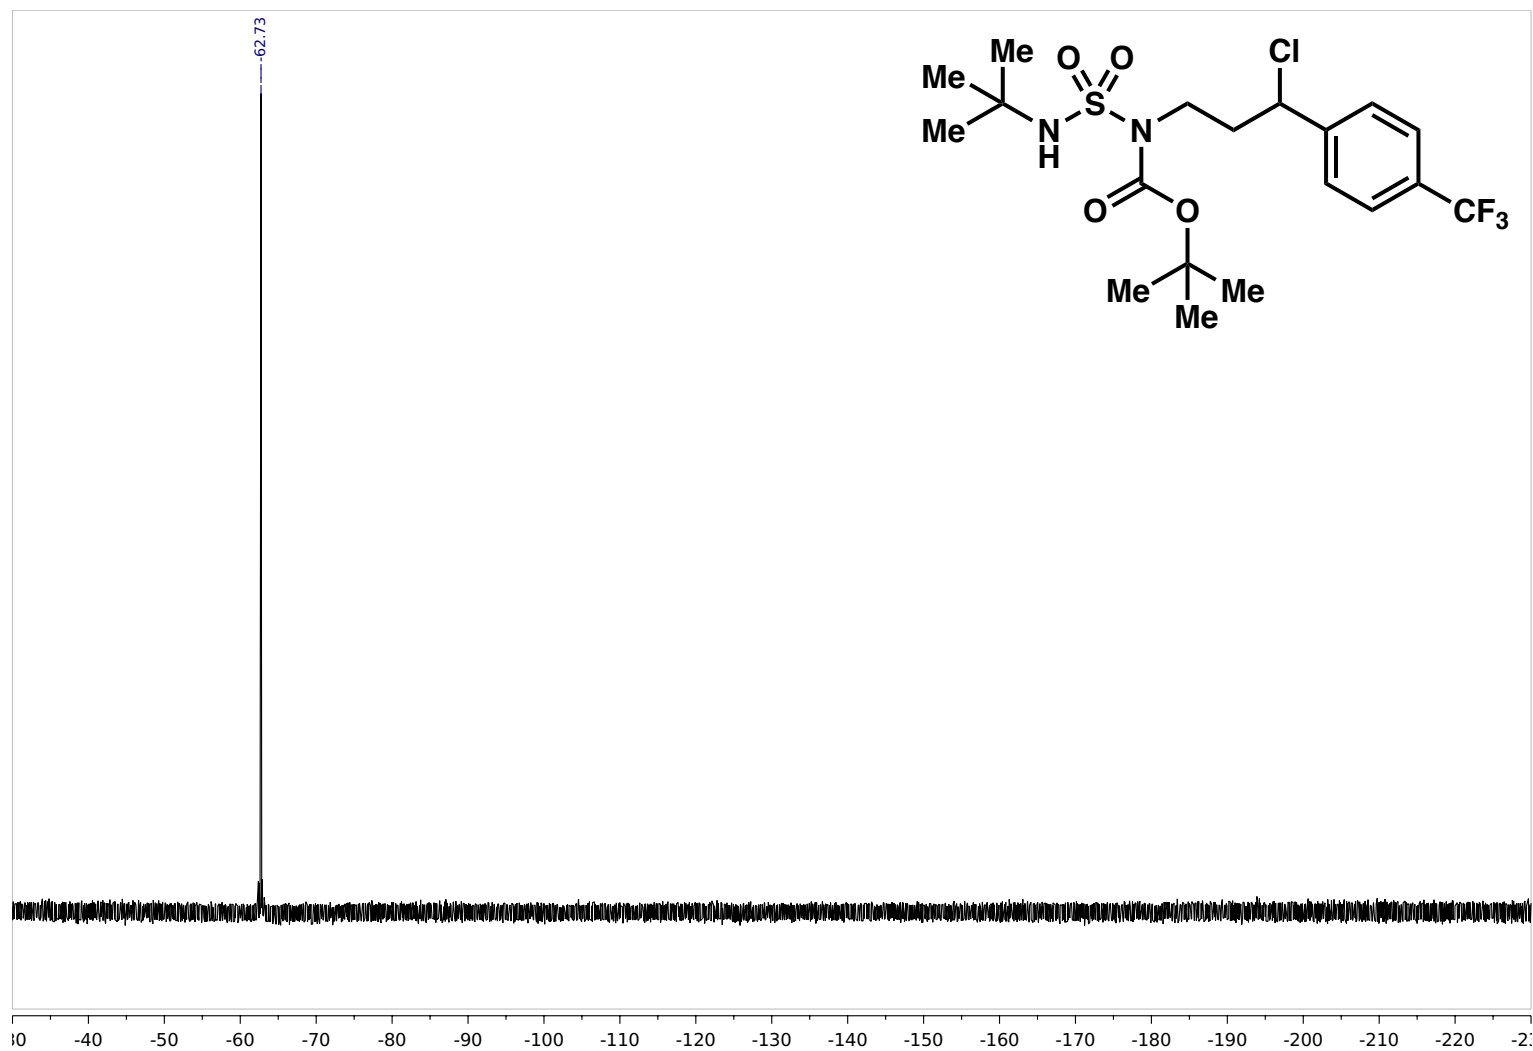

$^{19}\text{F}$  NMR (376 MHz,  $\text{CDCl}_3$ ) for *N*-*tert*-butoxycarbonyl-*N'*-*tert*-butyl-*N*-(3-chloro-3-((4-trifluoromethyl)phenyl)prop-1-yl)sulfamide (S10u)

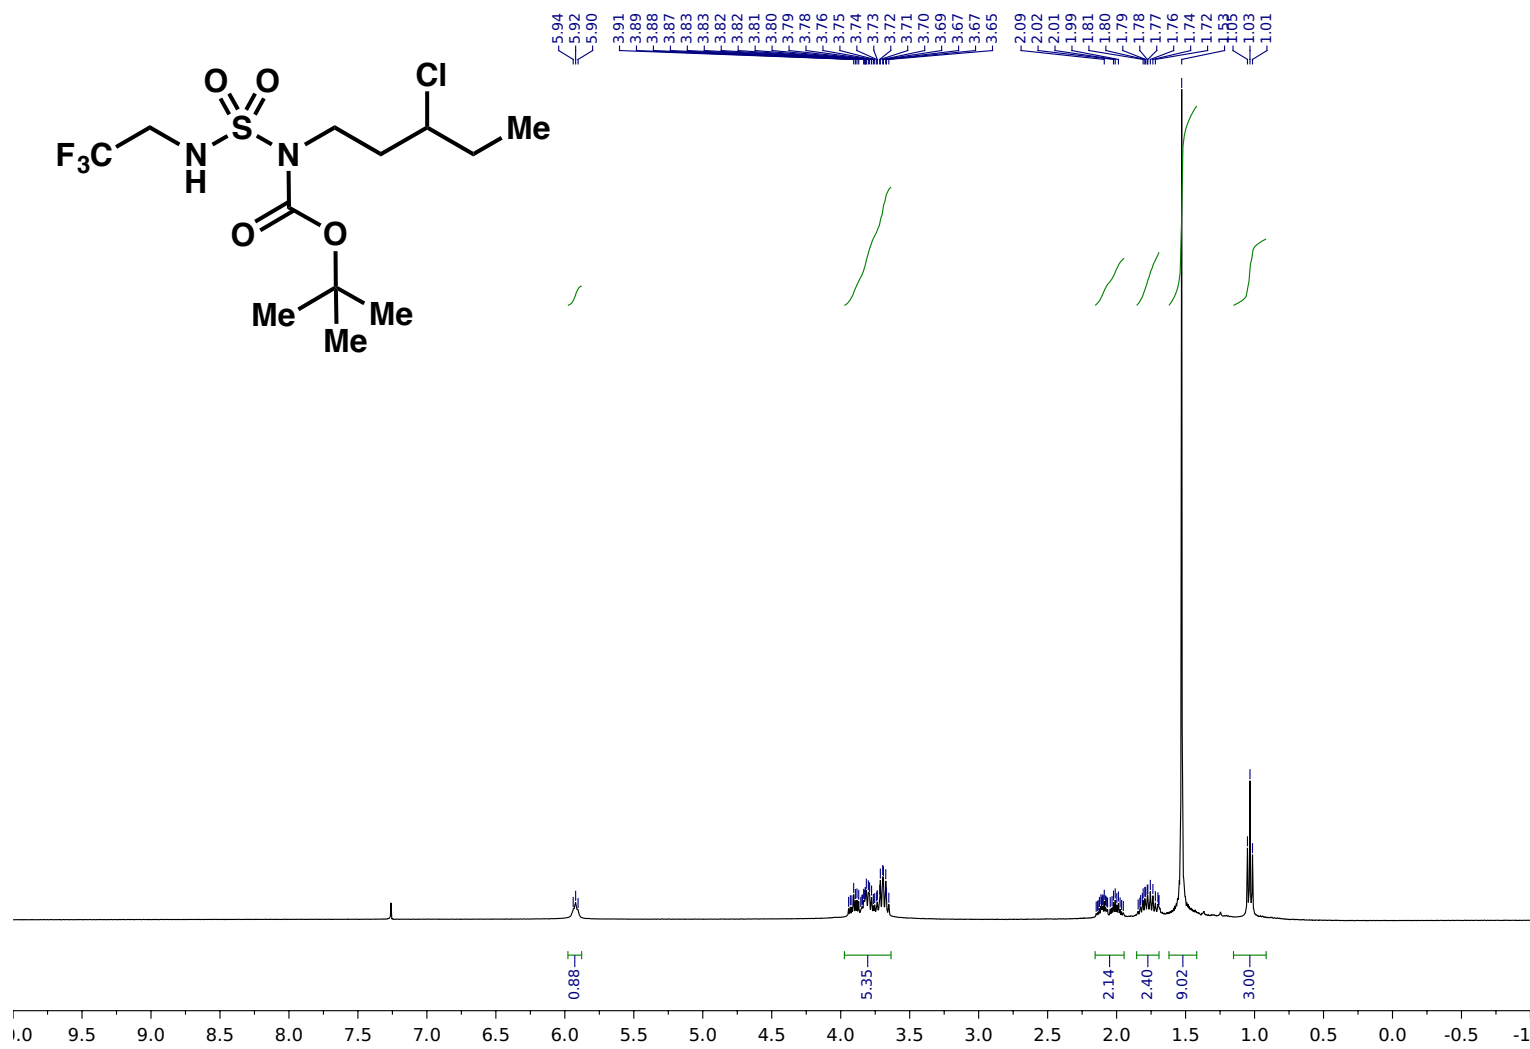

<sup>1</sup>H NMR (400 MHz, CDCl<sub>3</sub>) for *N-tert-butoxycarbonyl-N-(3-chloropent-1-yl)-N'-(2,2,2-trifluoroethyl)sulfamide (S10v)*

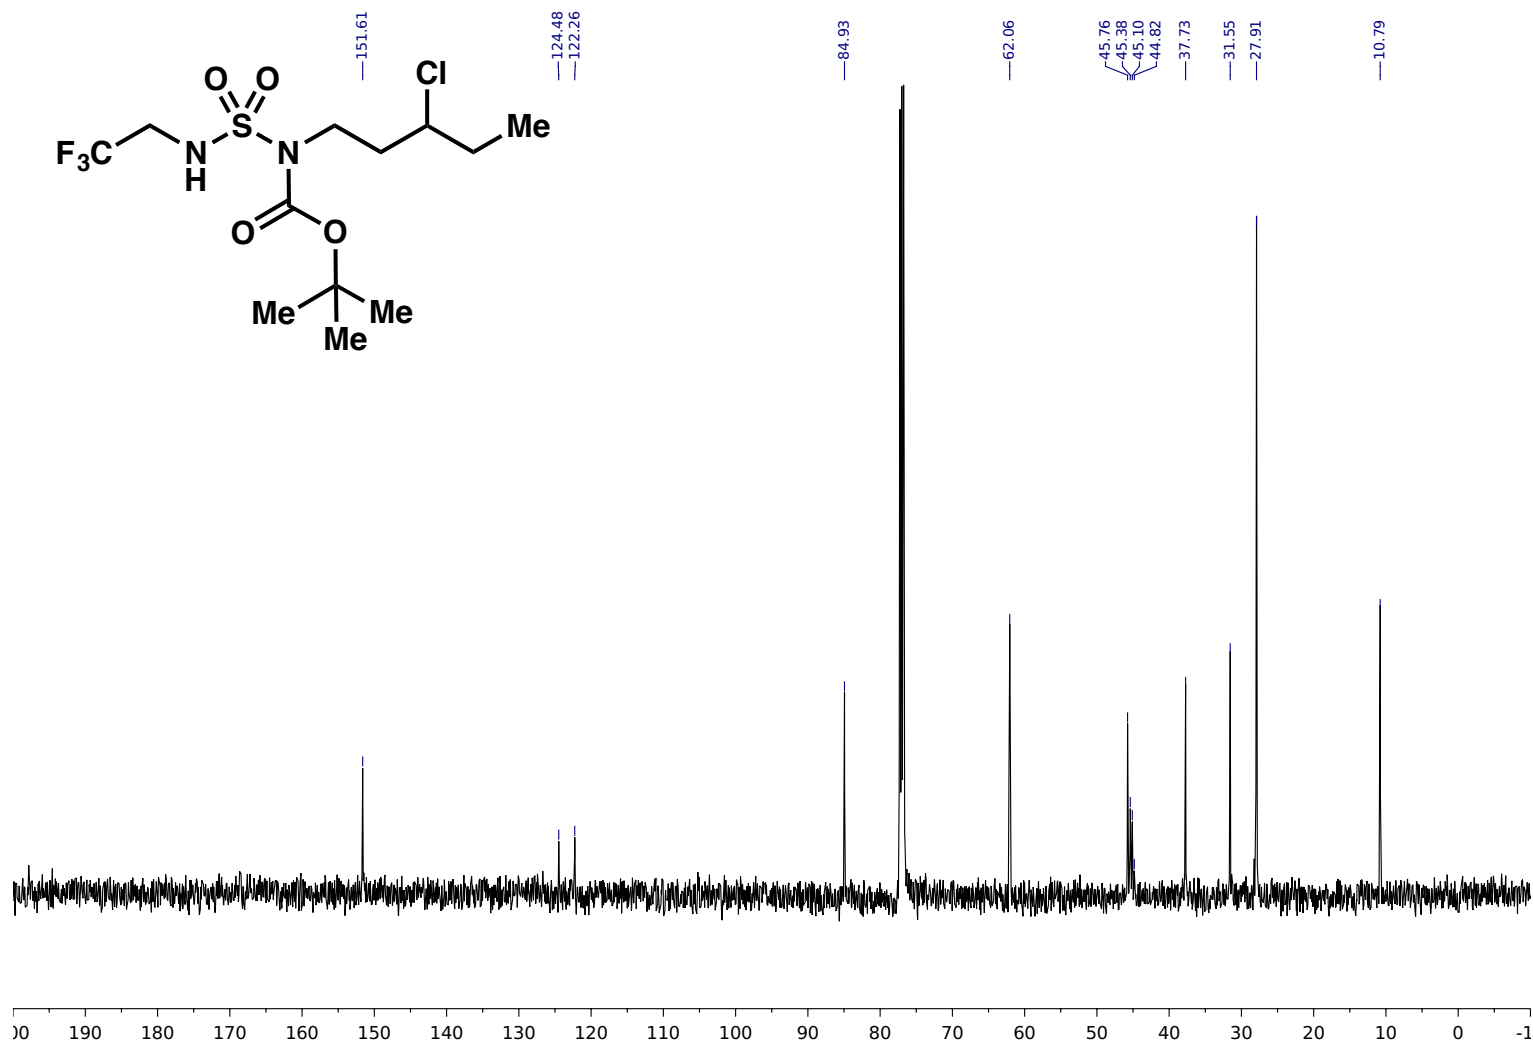

$^{13}\text{C}$  NMR (126 MHz,  $\text{CDCl}_3$ ) for *N-tert-butoxycarbonyl-N-(3-chloropent-1-yl)-N'-(2,2,2-trifluoroethyl)sulfamide (S10v)*

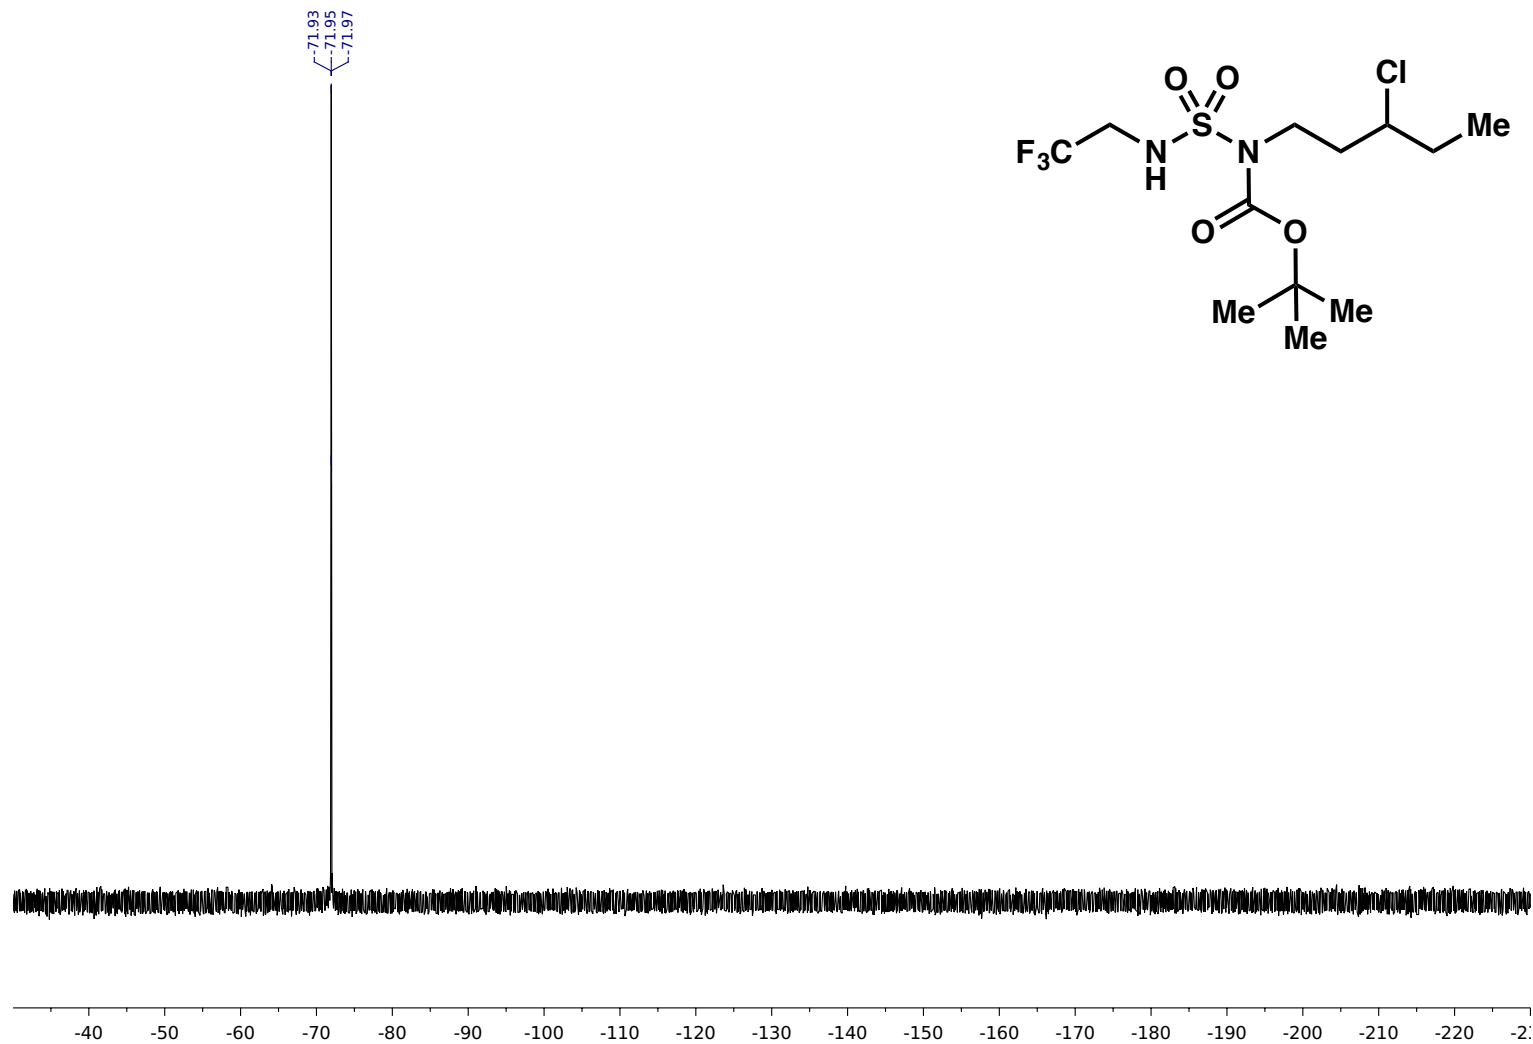

$^{19}\text{F}$  NMR (376 MHz,  $\text{CDCl}_3$ ) for *N*-*tert*-butoxycarbonyl-*N*-(3-chloropent-1-yl)-*N'*-(2,2,2-trifluoroethyl)sulfamide (S10v)



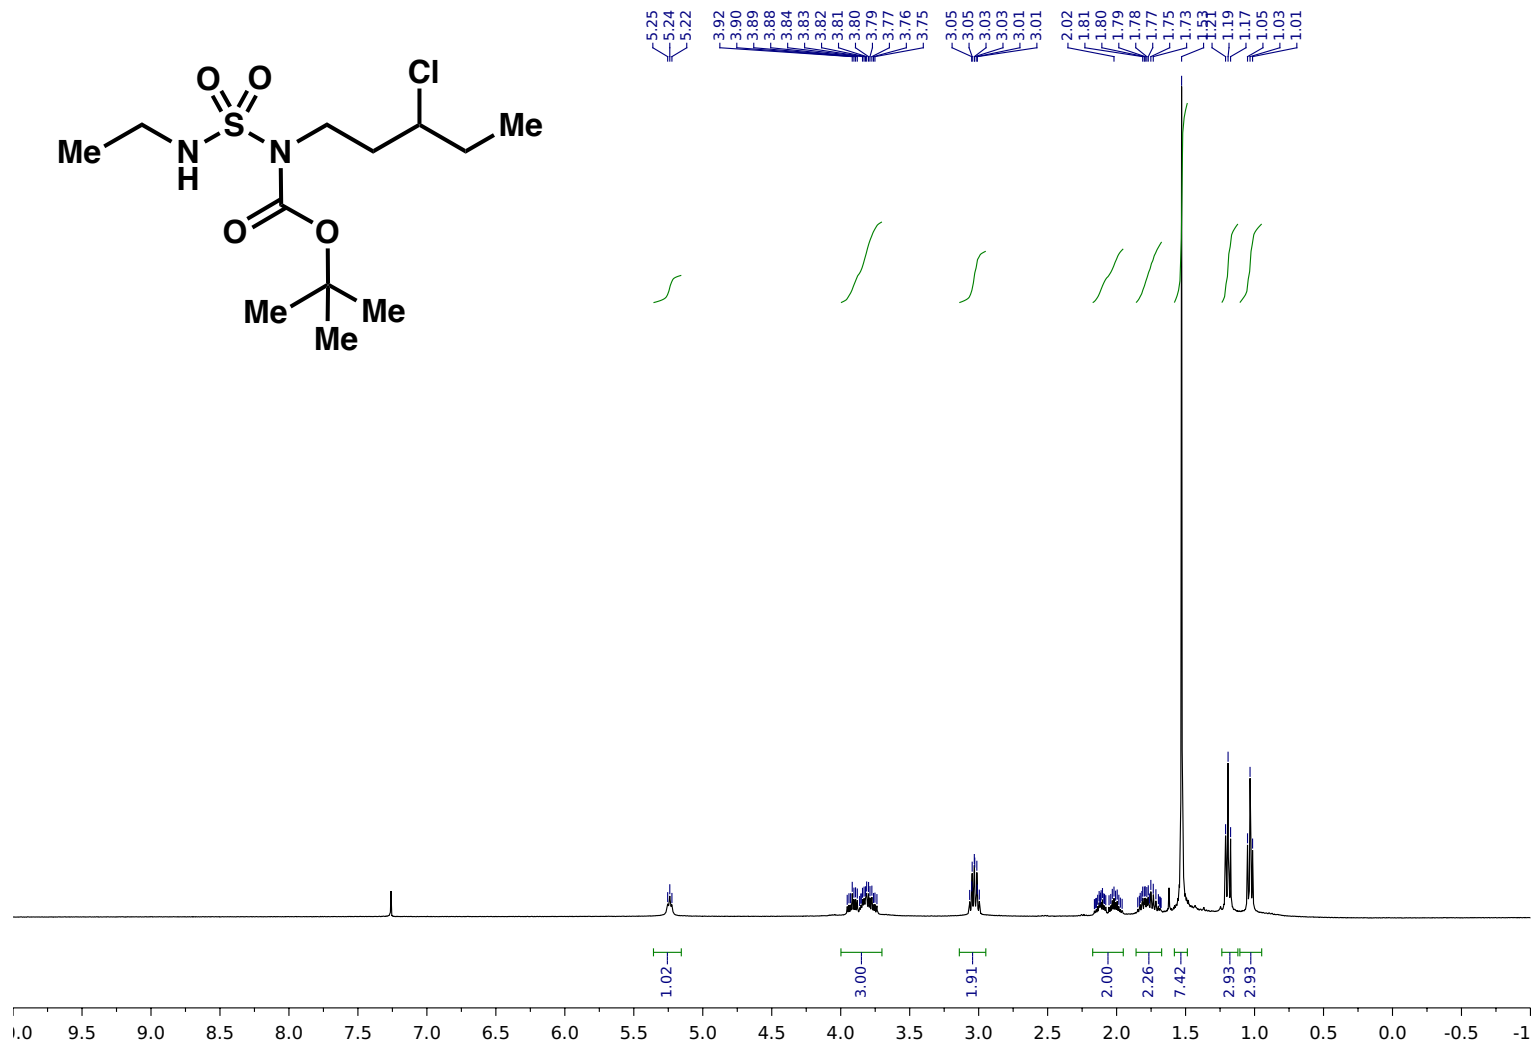

<sup>1</sup>H NMR (400 MHz, CDCl<sub>3</sub>) for *N*-*tert*-butoxycarbonyl-*N*-(3-chloroprop-1-yl)-*N'*-ethylsulfamide (S10w)

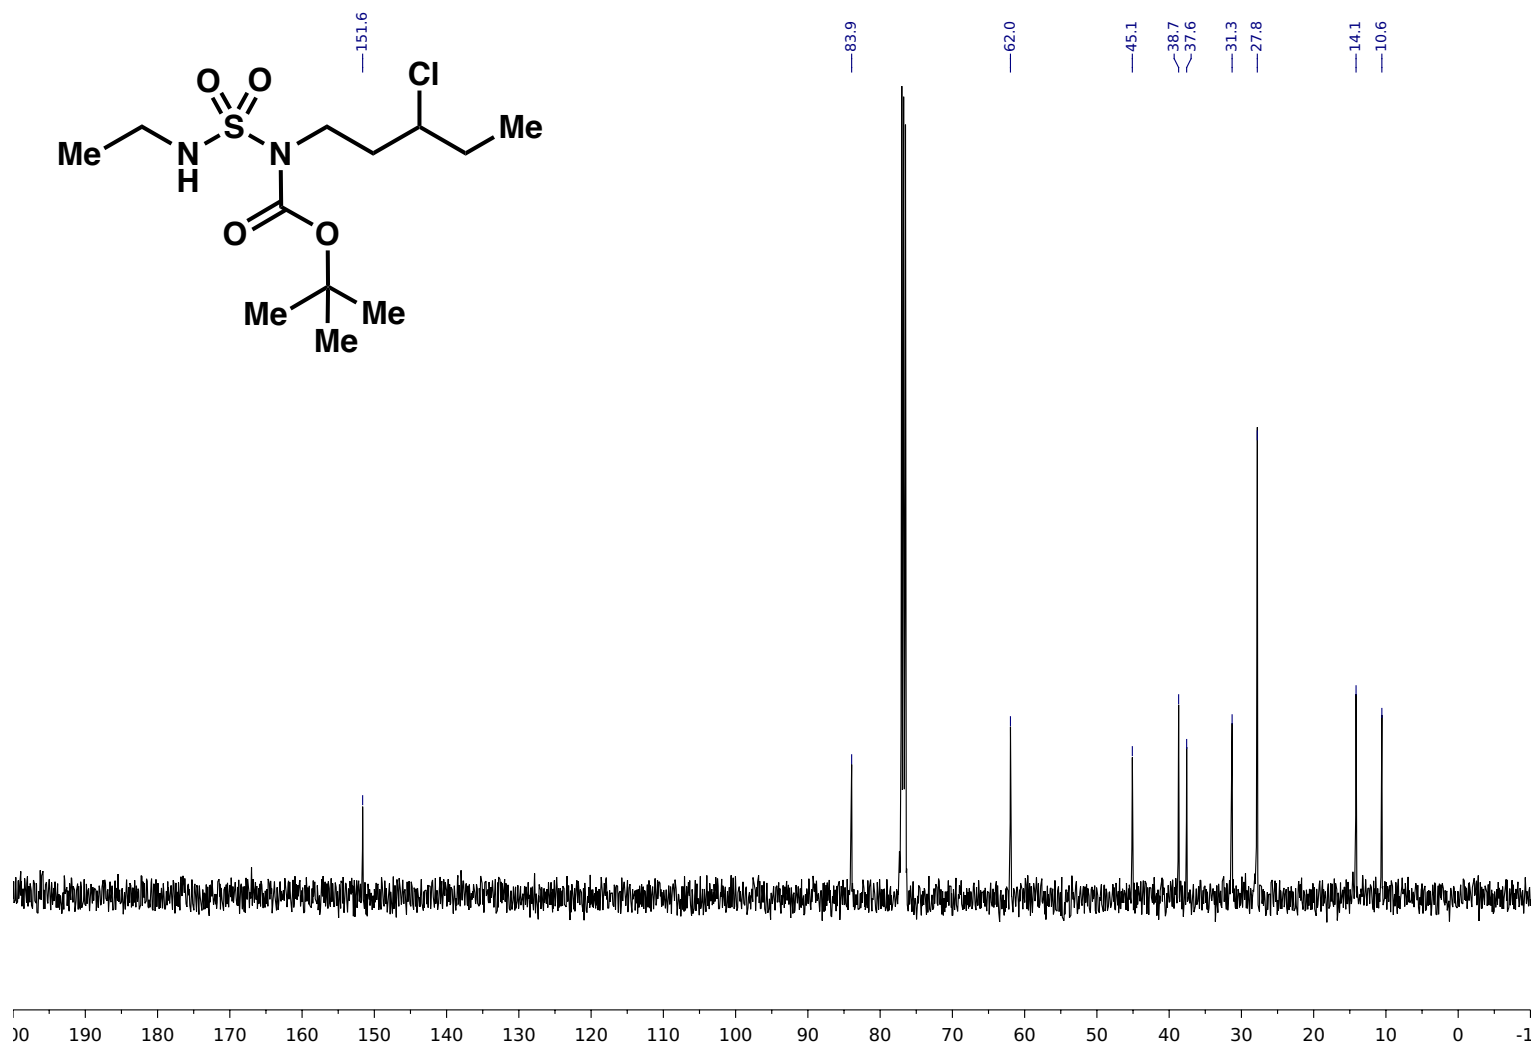

$^{13}\text{C}$  NMR (126 MHz,  $\text{CDCl}_3$ ) for *N-tert-butoxycarbonyl-N-(3-chloropent-1-yl)-N'-ethylsulfamide* (S10w)

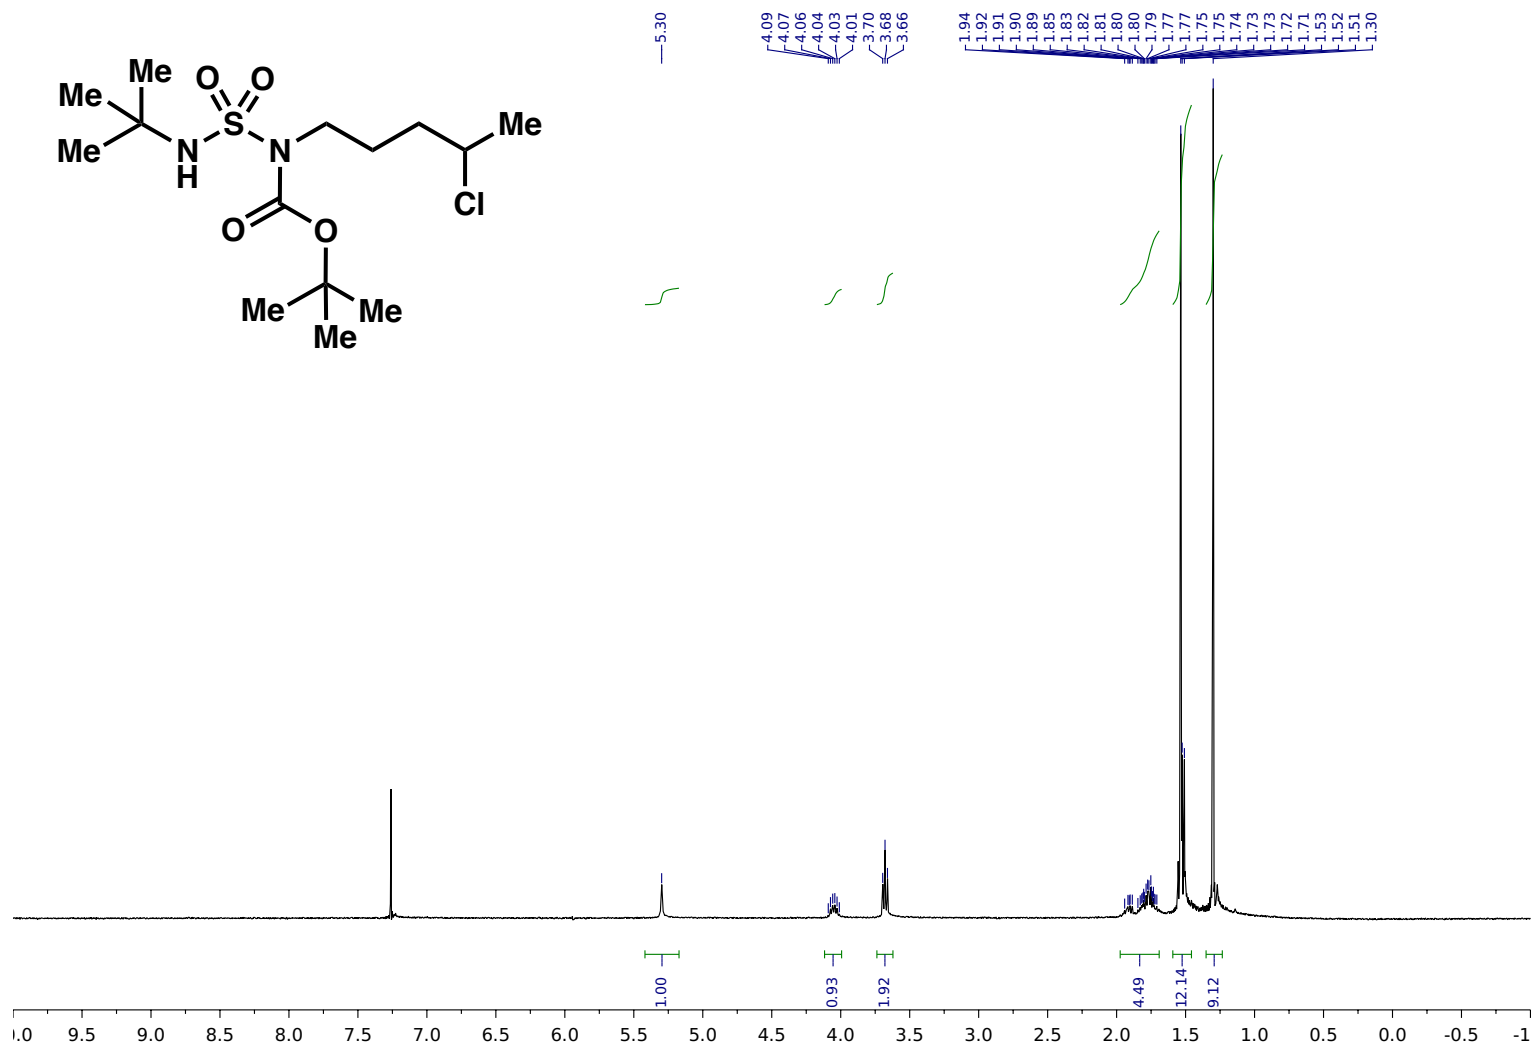

<sup>1</sup>H NMR (400 MHz, CDCl<sub>3</sub>) for *N*-*tert*-butoxycarbonyl-*N'*-*tert*-butyl-*N*-(4-chloropent-1-yl)sulfamide (**7i**)

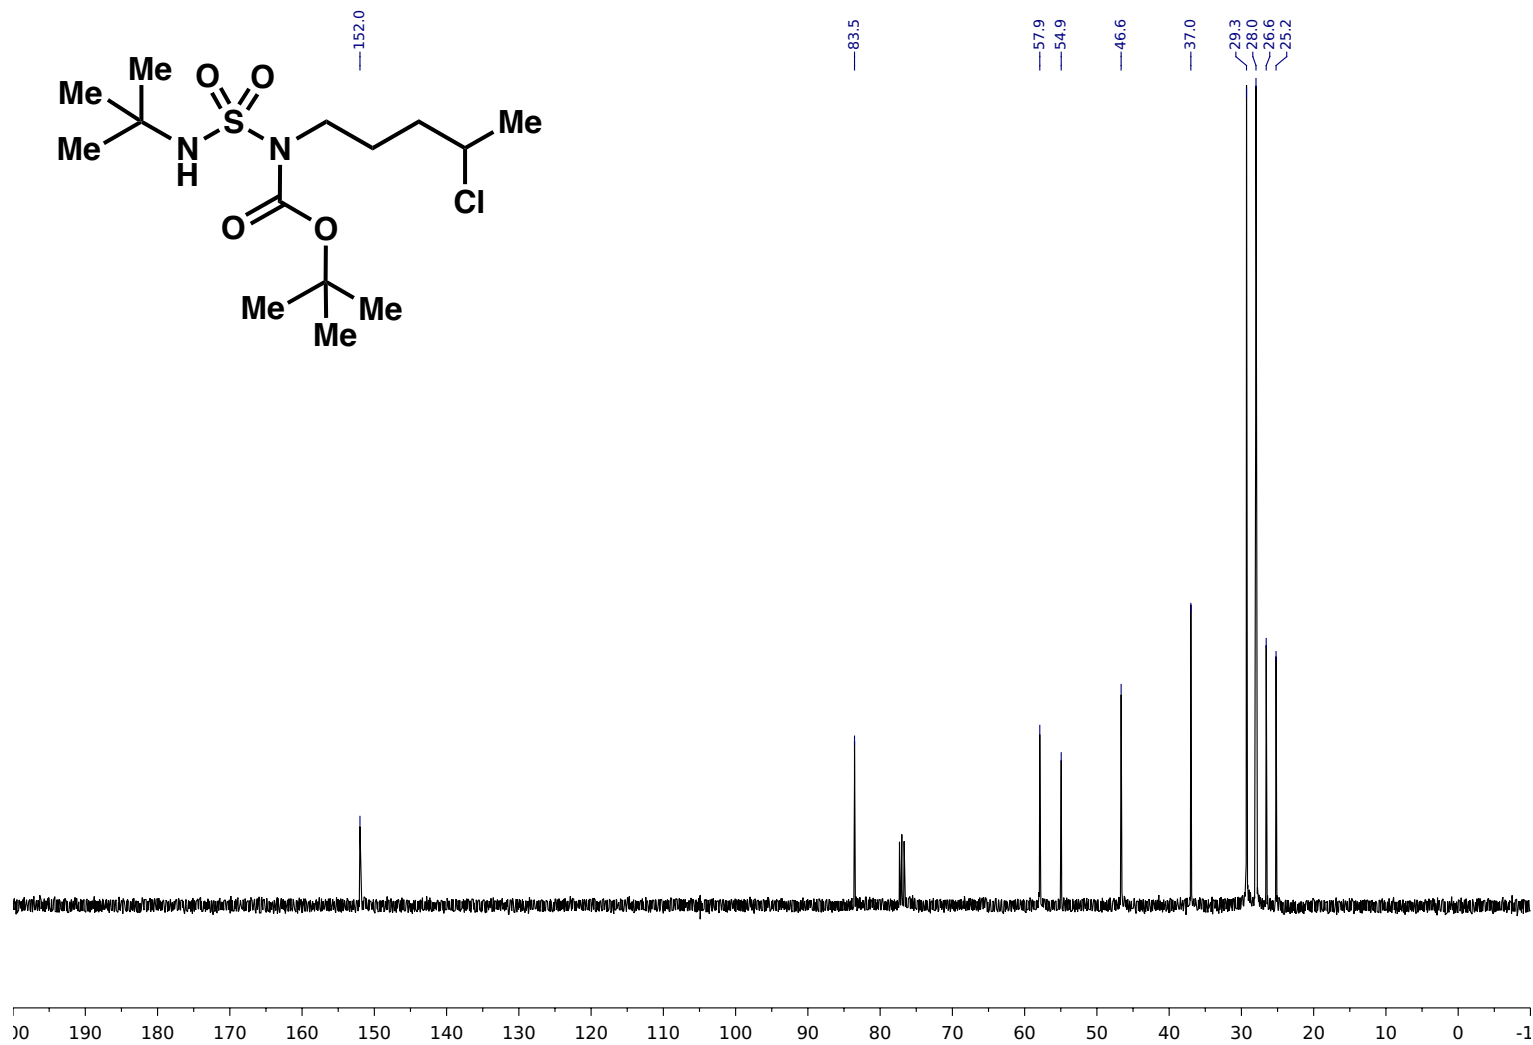

<sup>13</sup>C NMR (126 MHz, CDCl<sub>3</sub>) for *N*-*tert*-butoxycarbonyl-*N'*-*tert*-butyl-*N*-(4-chloropent-1-yl)sulfamide (7i)

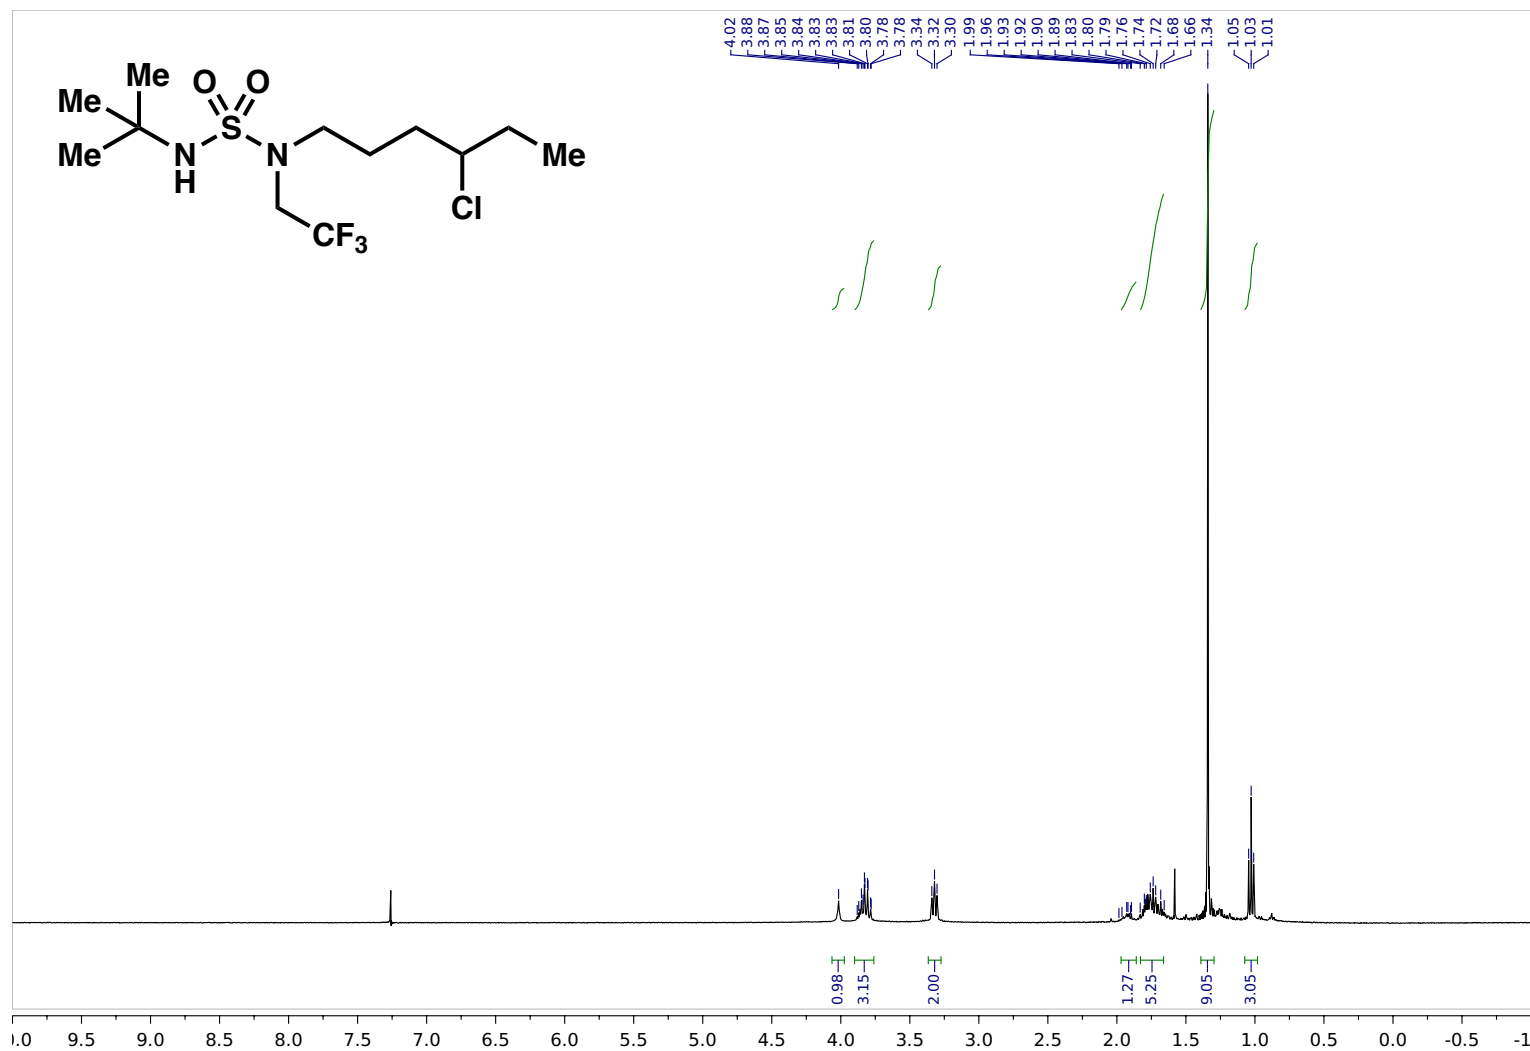

<sup>1</sup>H NMR (400 MHz, CDCl<sub>3</sub>) for *N*-*tert*-butyl-*N'*-(4-chlorohex-1-yl)-*N'*-(2,2,2-trifluoroethyl)sulfamide (**7m**)

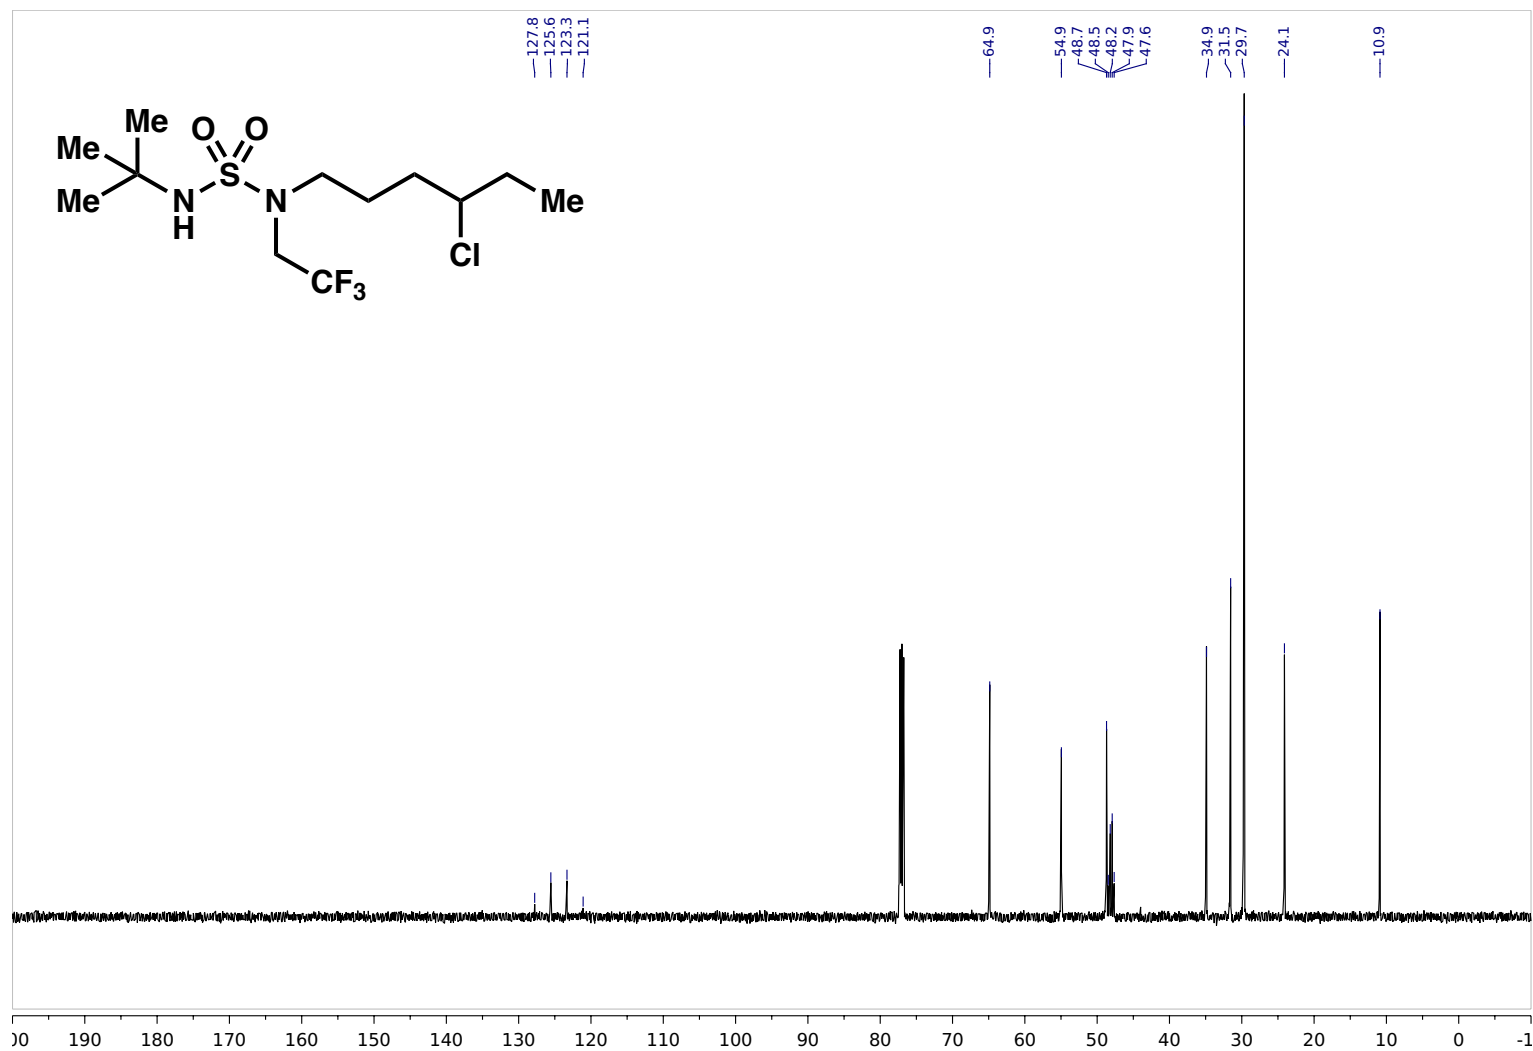

<sup>13</sup>C NMR (126 MHz, CDCl<sub>3</sub>) for *N*-*tert*-butyl-*N'*-(4-chlorohex-1-yl)-*N'*-(2,2,2-trifluoroethyl)sulfamide (**7m**)

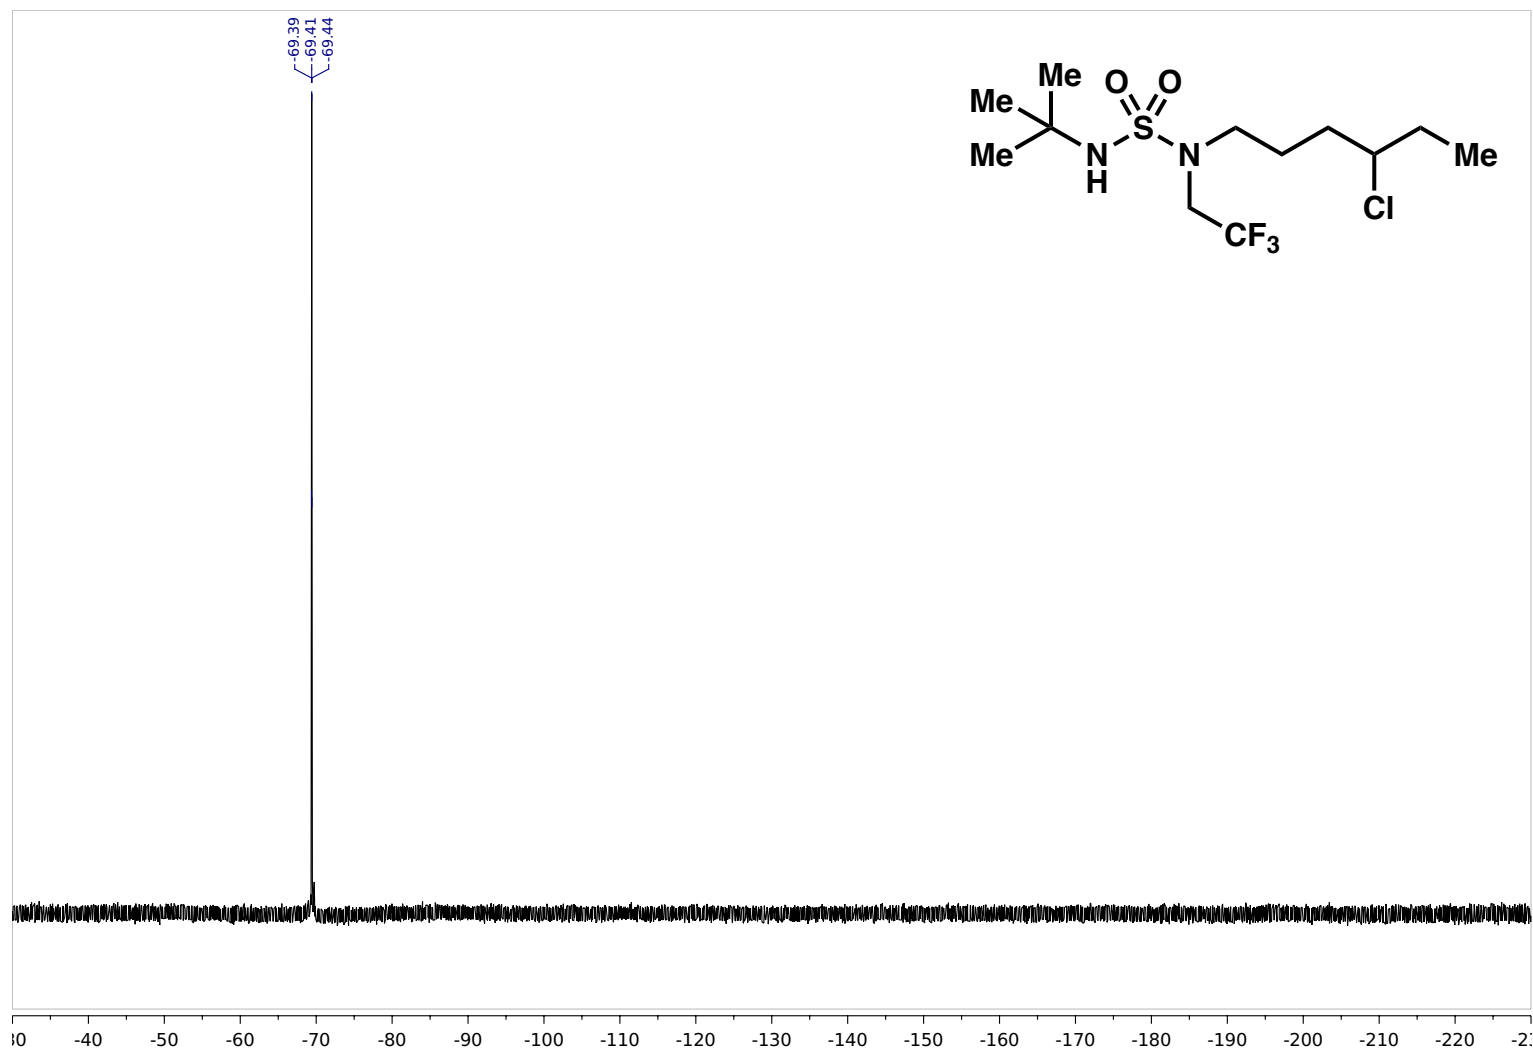

$^{19}\text{F}$  NMR (376 MHz,  $\text{CDCl}_3$ ) for *N*-*tert*-butyl-*N'*-(4-chlorohex-1-yl)-*N'*-(2,2,2-trifluoroethyl)sulfamide (**7m**)

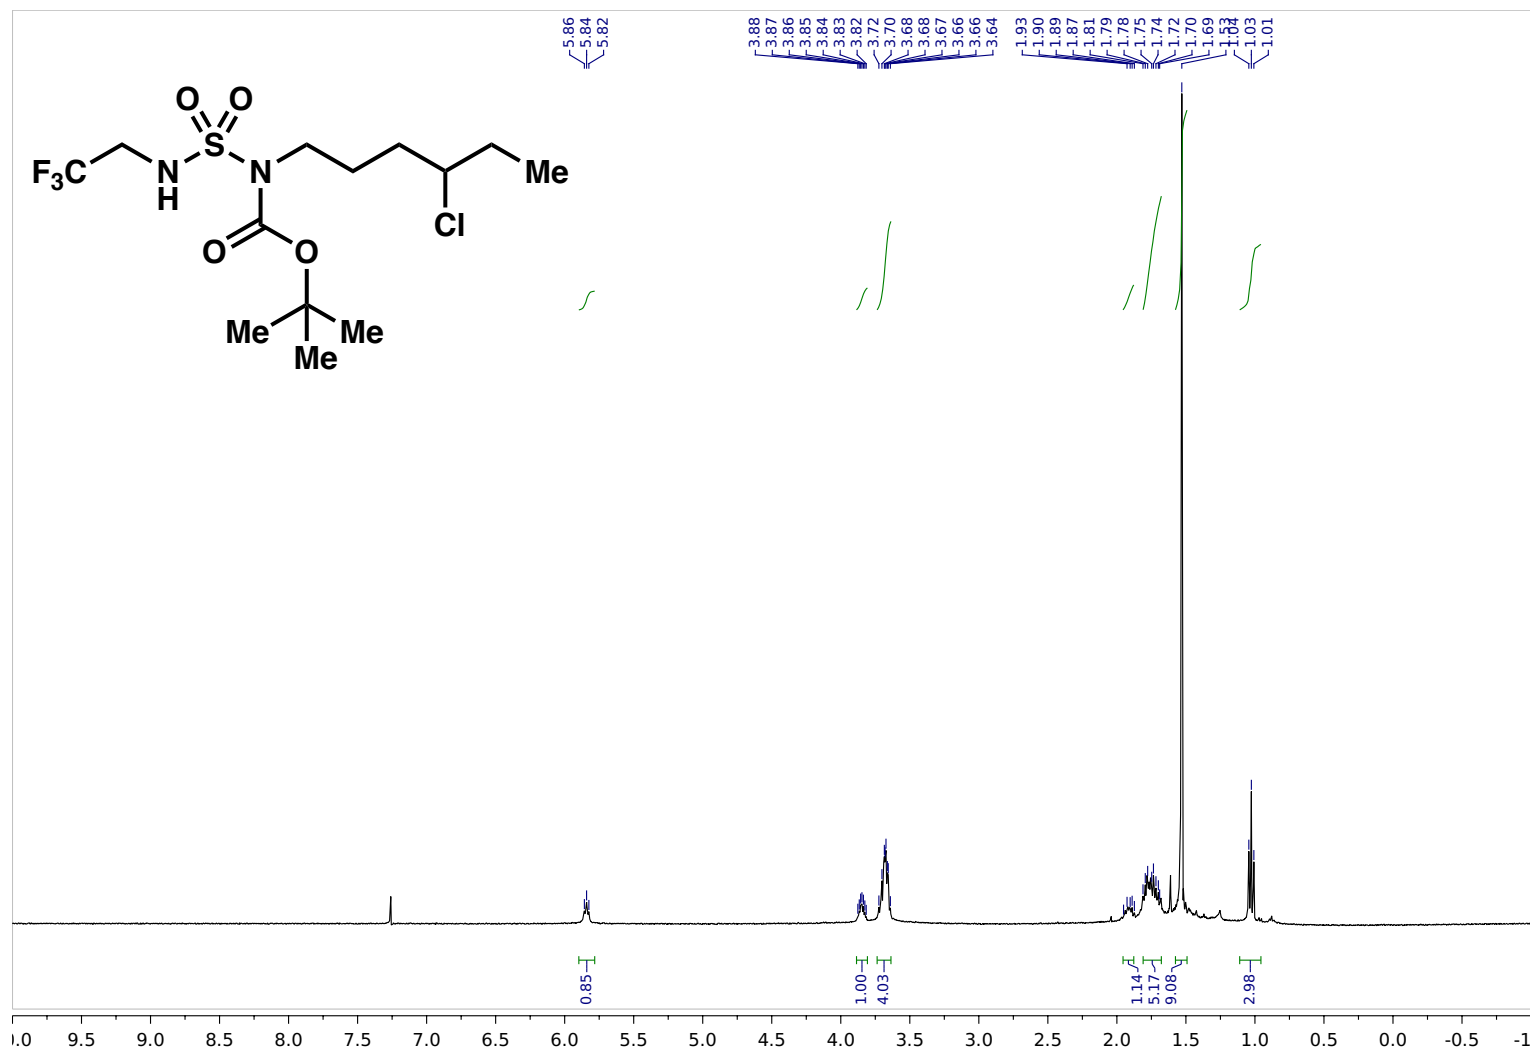



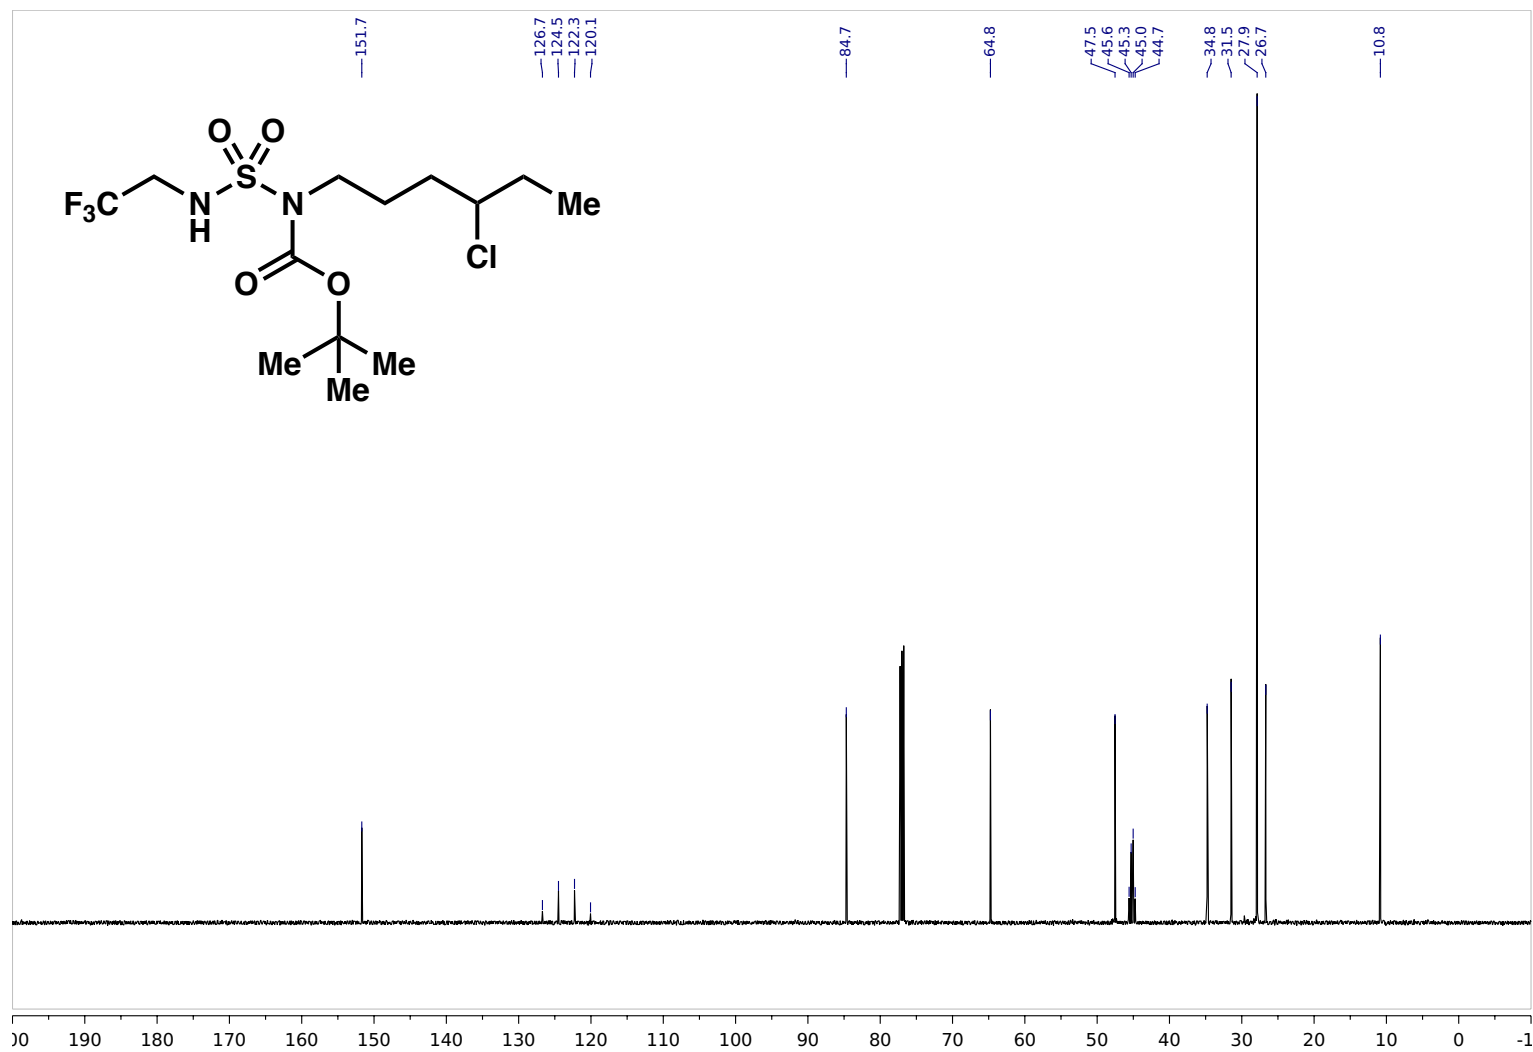

<sup>13</sup>C NMR (126 MHz, CDCl<sub>3</sub>) for *N-tert-butoxycarbonyl-N-(4-chlorohex-1-yl)-N'-(2,2,2-trifluoroethyl)sulfamide (7o)*

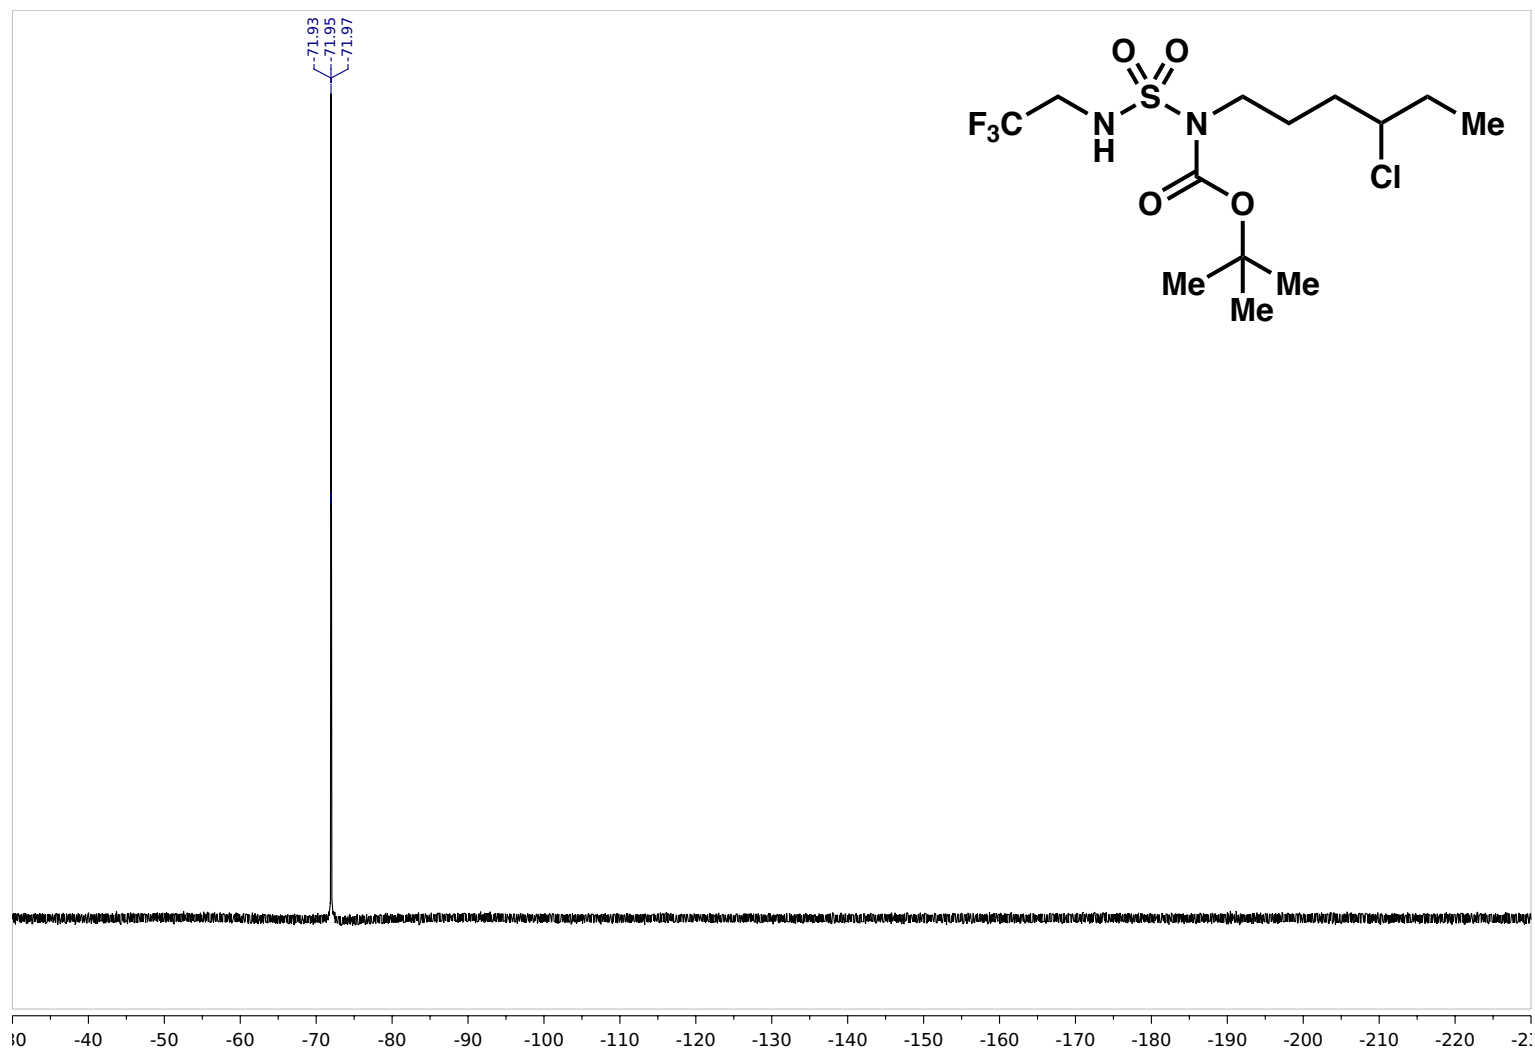

$^{19}\text{F}$  NMR (376 MHz,  $\text{CDCl}_3$ ) for *N-tert*-butoxycarbonyl-*N*-(4-chlorohex-1-yl)-*N'*-(2,2,2-trifluoroethyl)sulfamide (**70**)

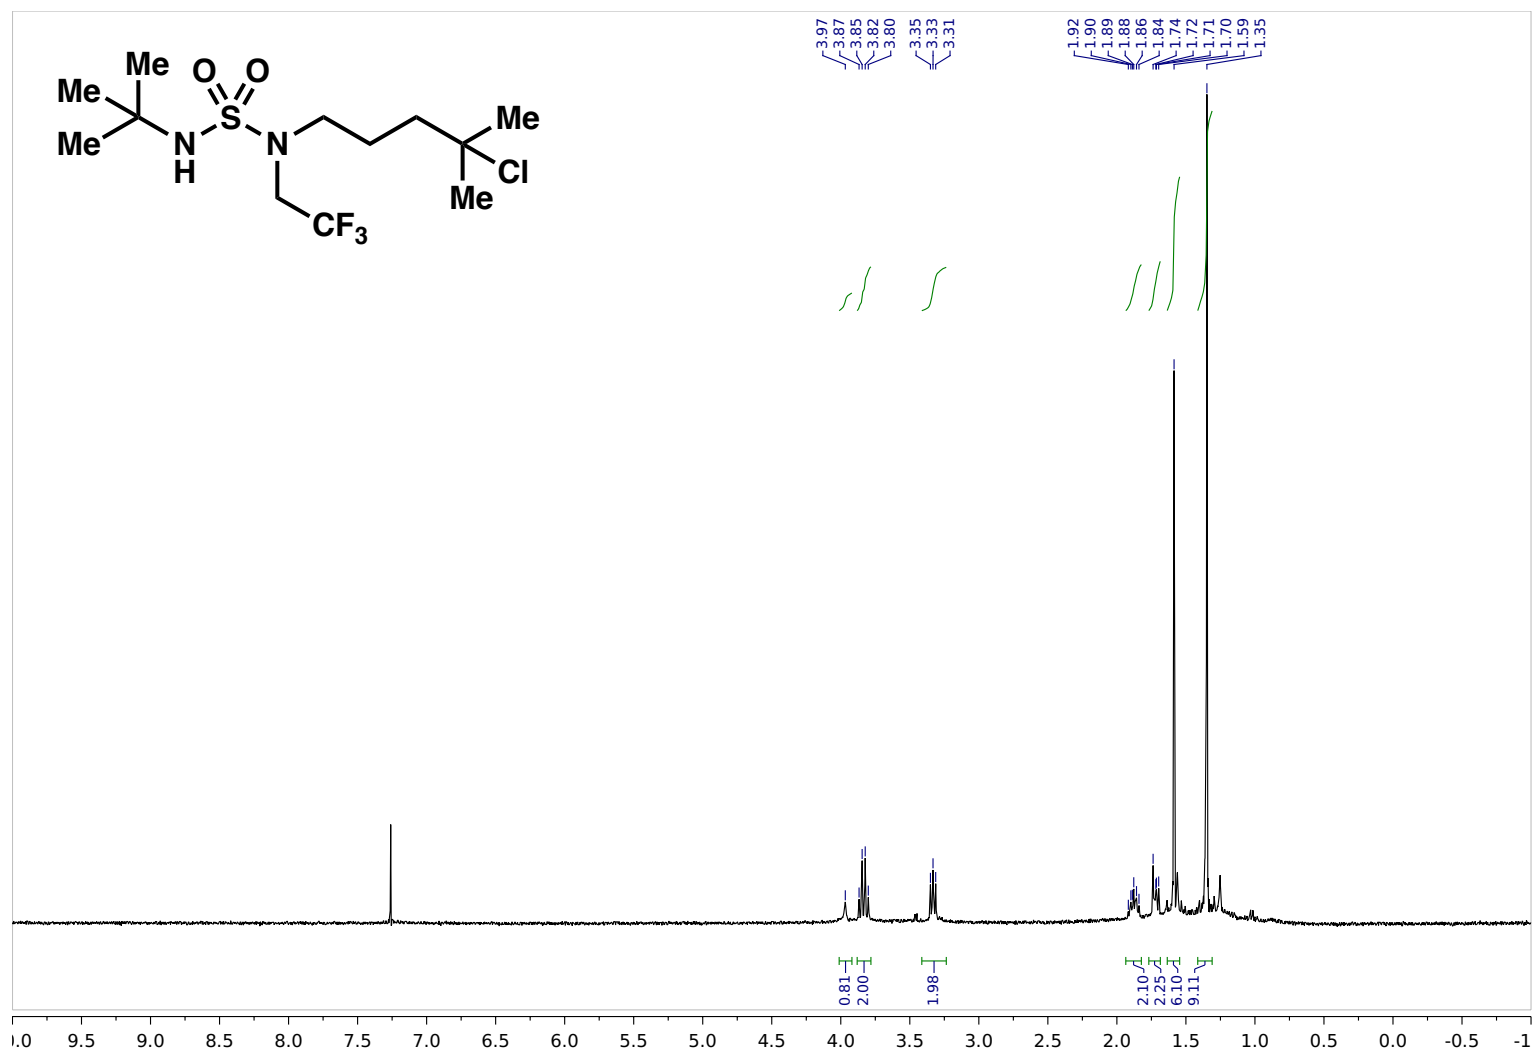

<sup>1</sup>H NMR (400 MHz, CDCl<sub>3</sub>) for *N*-*tert*-butyl-*N'*-(4-chloro-4-methylpent-1-yl)-*N'*-(2,2,2-trifluoroethyl)sulfamide (7p)

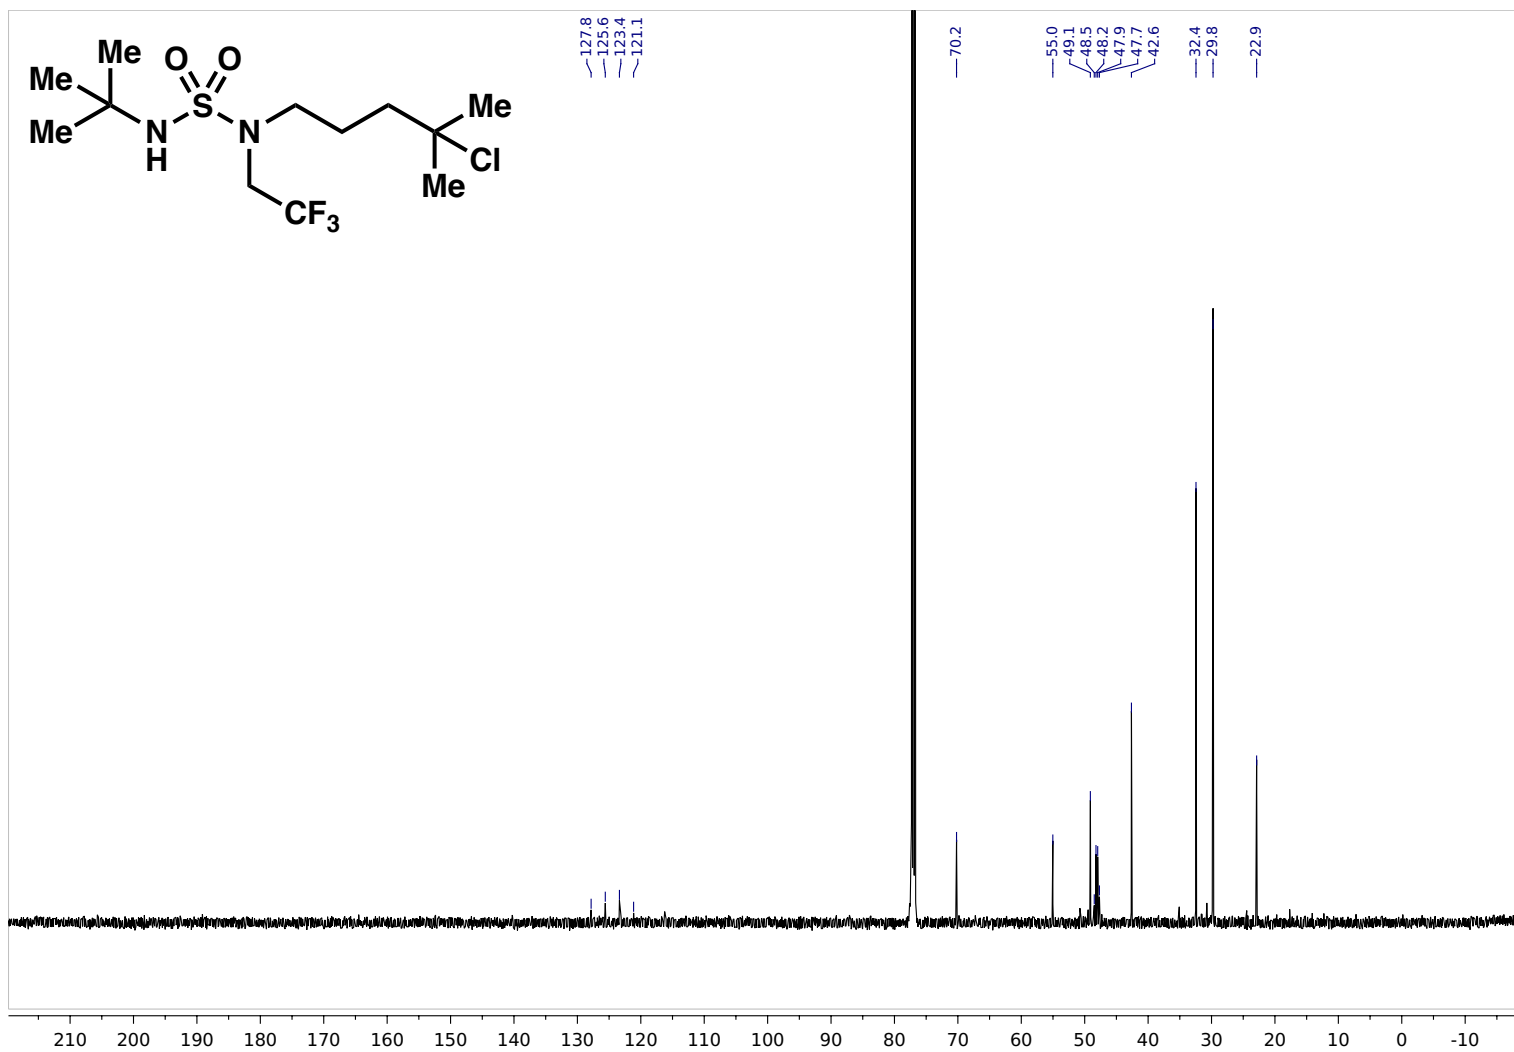

<sup>13</sup>C NMR (126 MHz, CDCl<sub>3</sub>) for *N*-*tert*-butyl-*N'*-(4-chloro-4-methylpent-1-yl)-*N'*-(2,2,2-trifluoroethyl)sulfamide (7p)

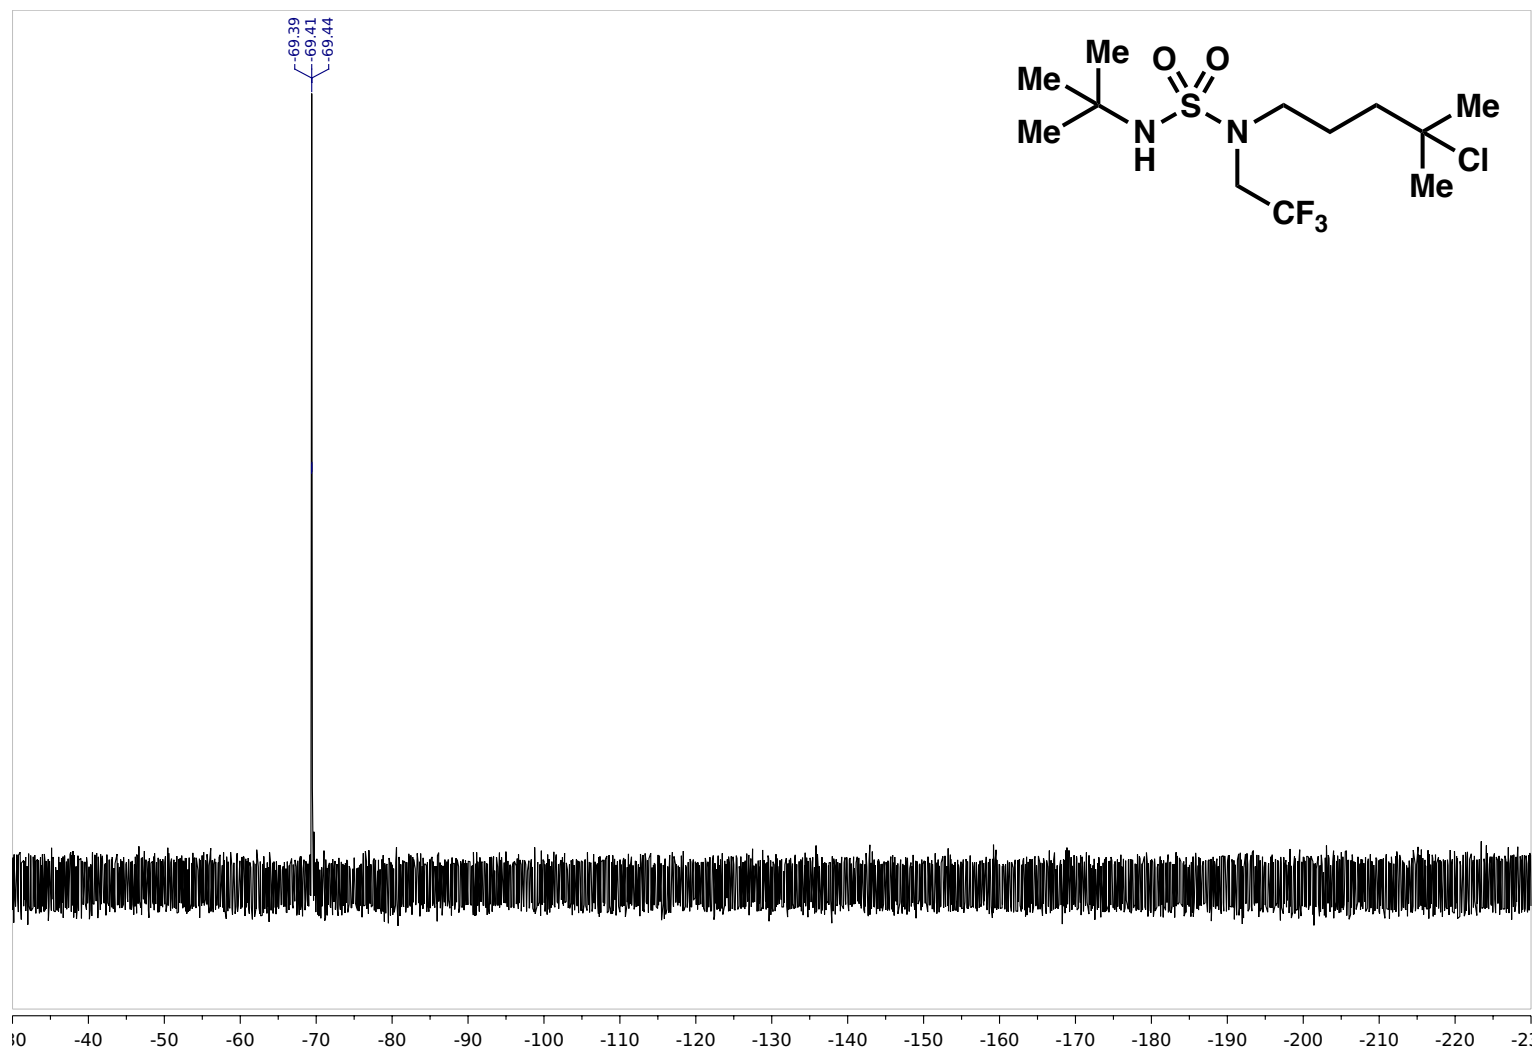

$^{19}\text{F}$  NMR (376 MHz,  $\text{CDCl}_3$ ) for *N*-*tert*-butyl-*N'*-(4-chloro-4-methylpent-1-yl)-*N'*-(2,2,2-trifluoroethyl)sulfamide (7p)

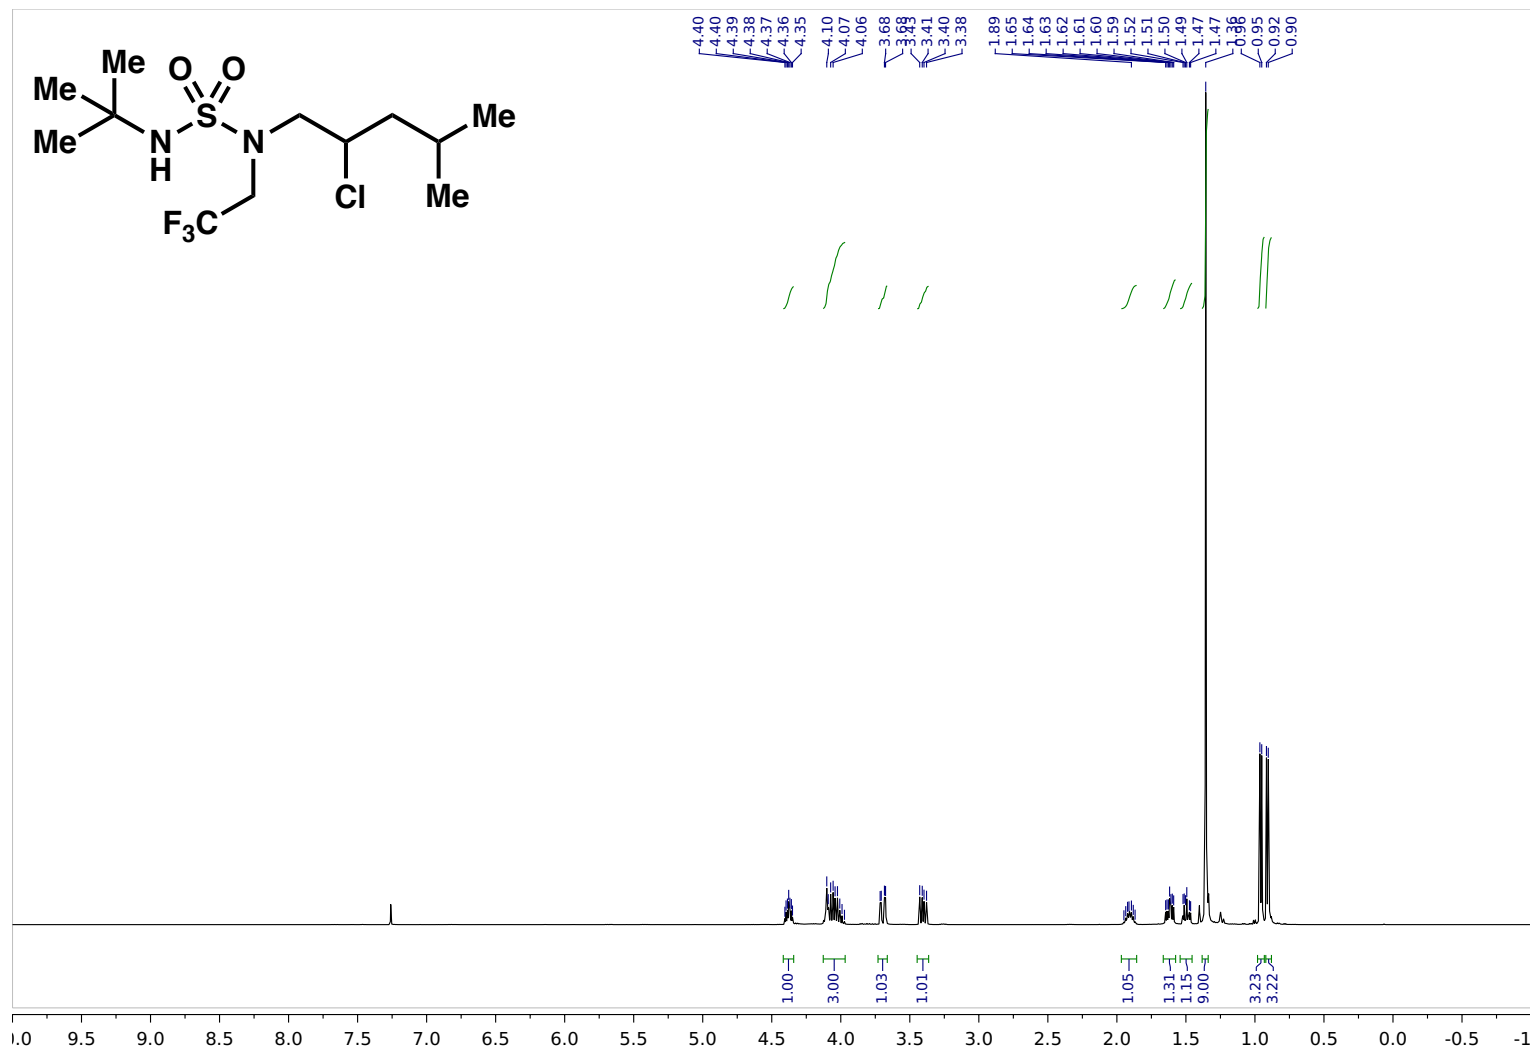

<sup>1</sup>H NMR (500 MHz, CDCl<sub>3</sub>) for *N*-*tert*-butyl-*N'*-(2-chloro-4-methylpent-1-yl)-*N'*-(2,2,2-trifluoroethyl)sulfamide (S11p)

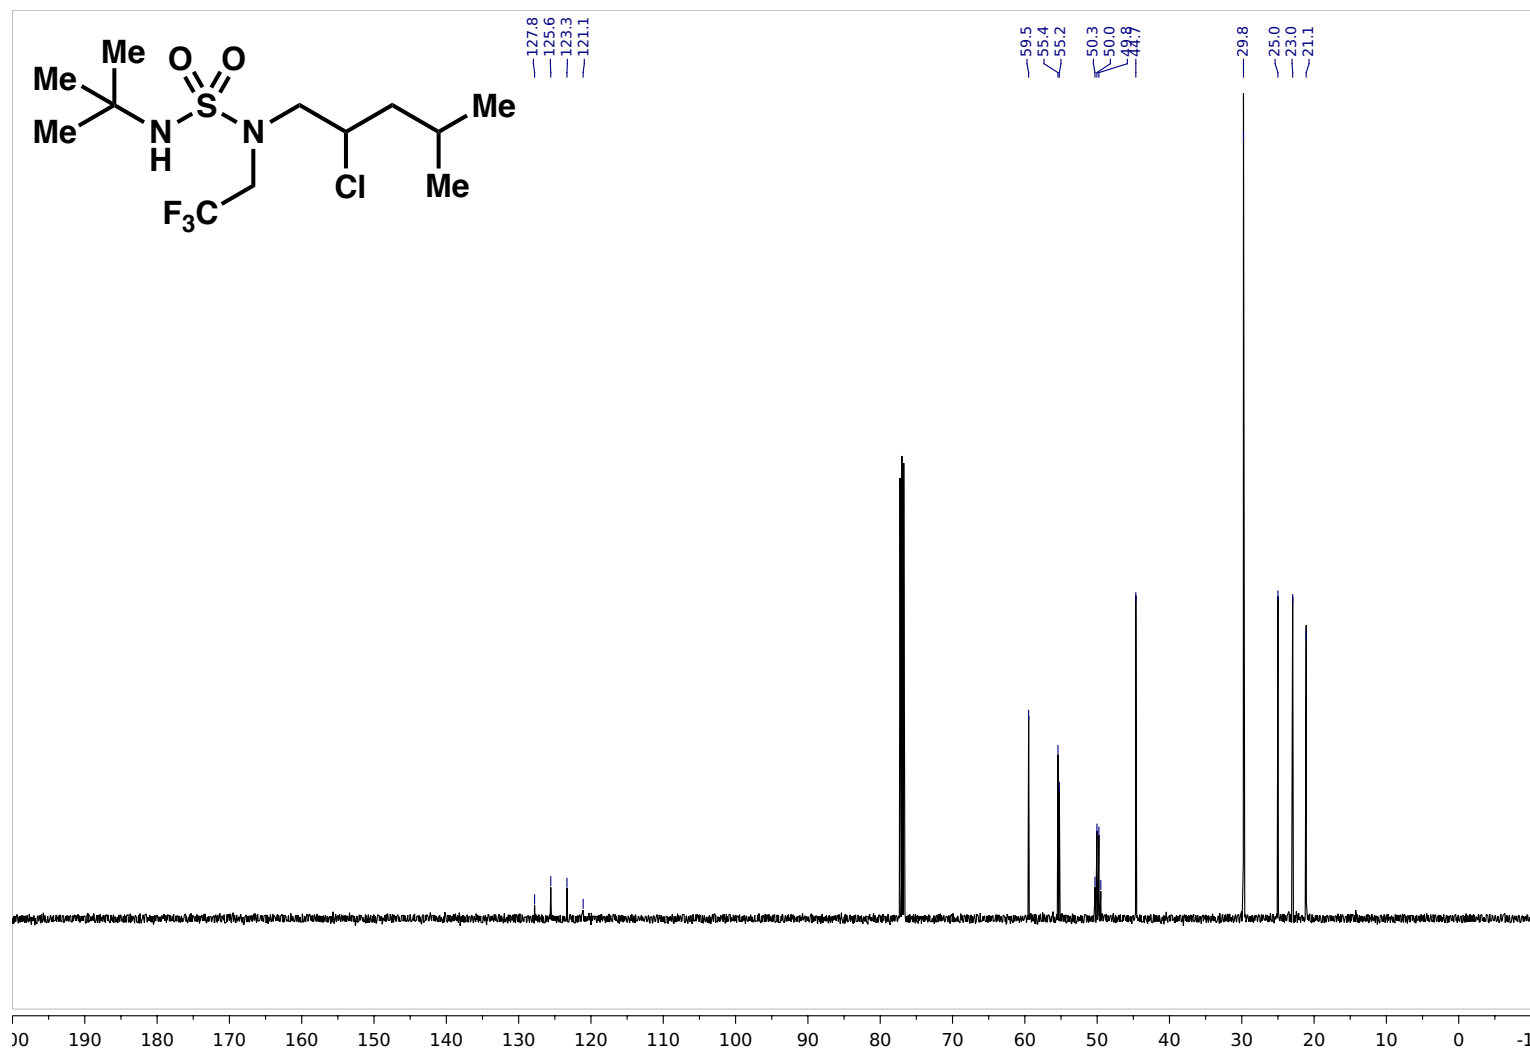

<sup>13</sup>C NMR (126 MHz, CDCl<sub>3</sub>) for *N*-*tert*-butyl-*N'*-(2-chloro-4-methylpent-1-yl)-*N'*-(2,2,2-trifluoroethyl)sulfamide (S11p)

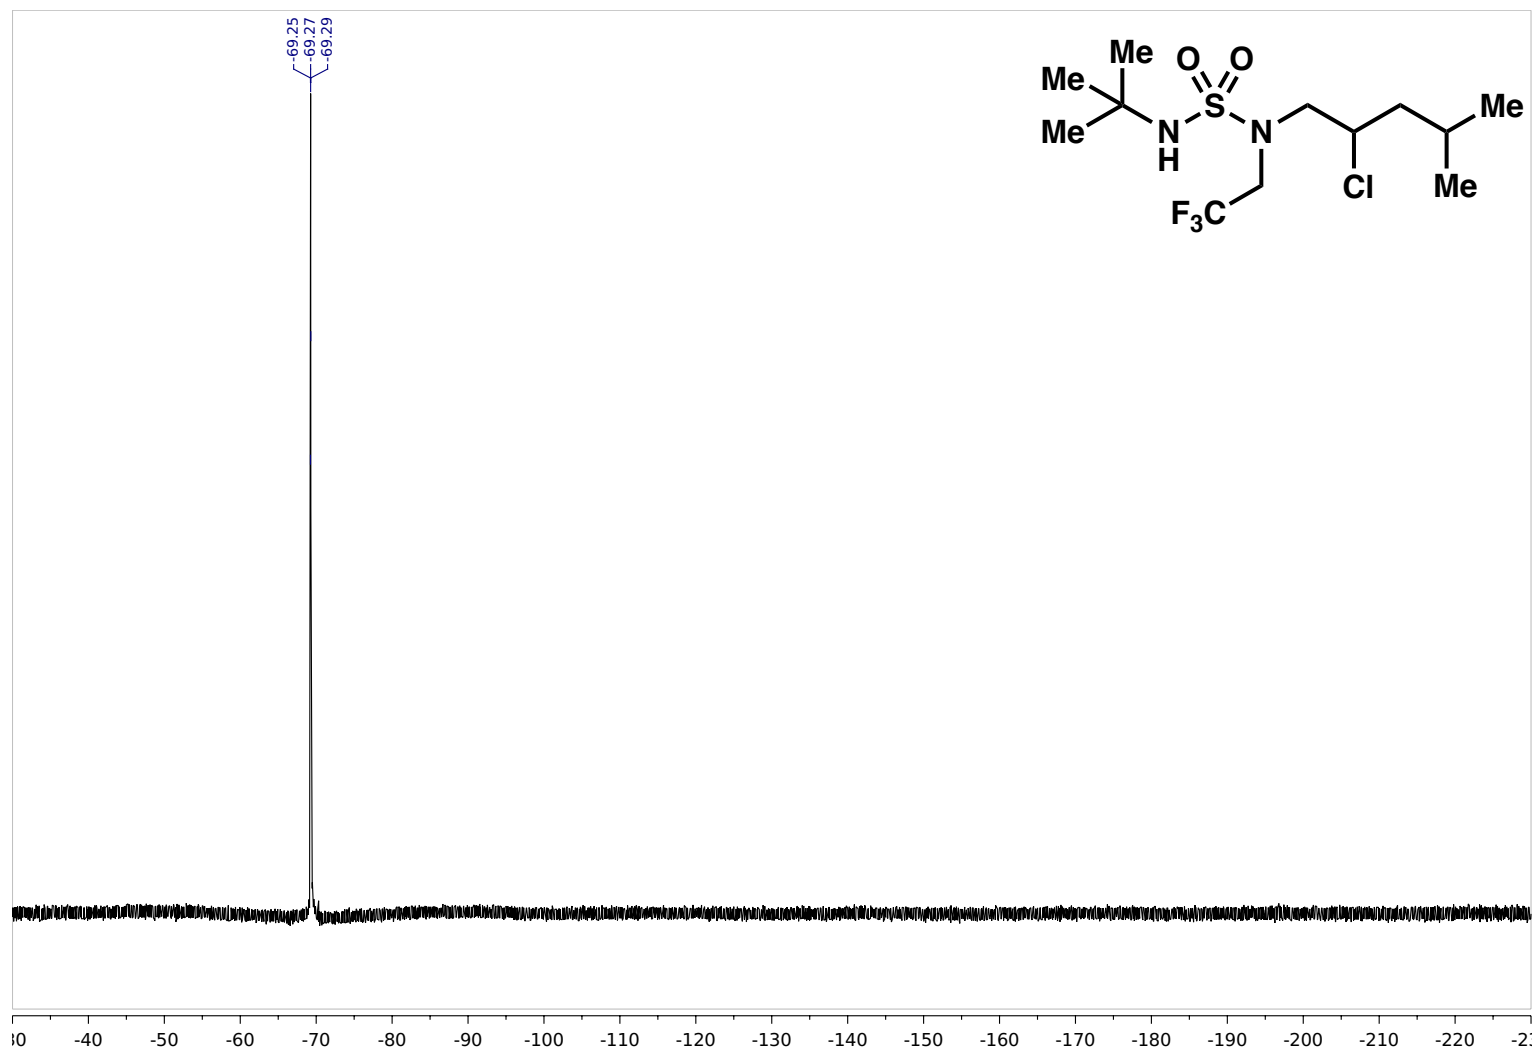

$^{19}\text{F}$  NMR (376 MHz,  $\text{CDCl}_3$ ) for *N*-*tert*-butyl-*N'*-(2-chloro-4-methylpent-1-yl)-*N'*-(2,2,2-trifluoroethyl)sulfamide (S11p)



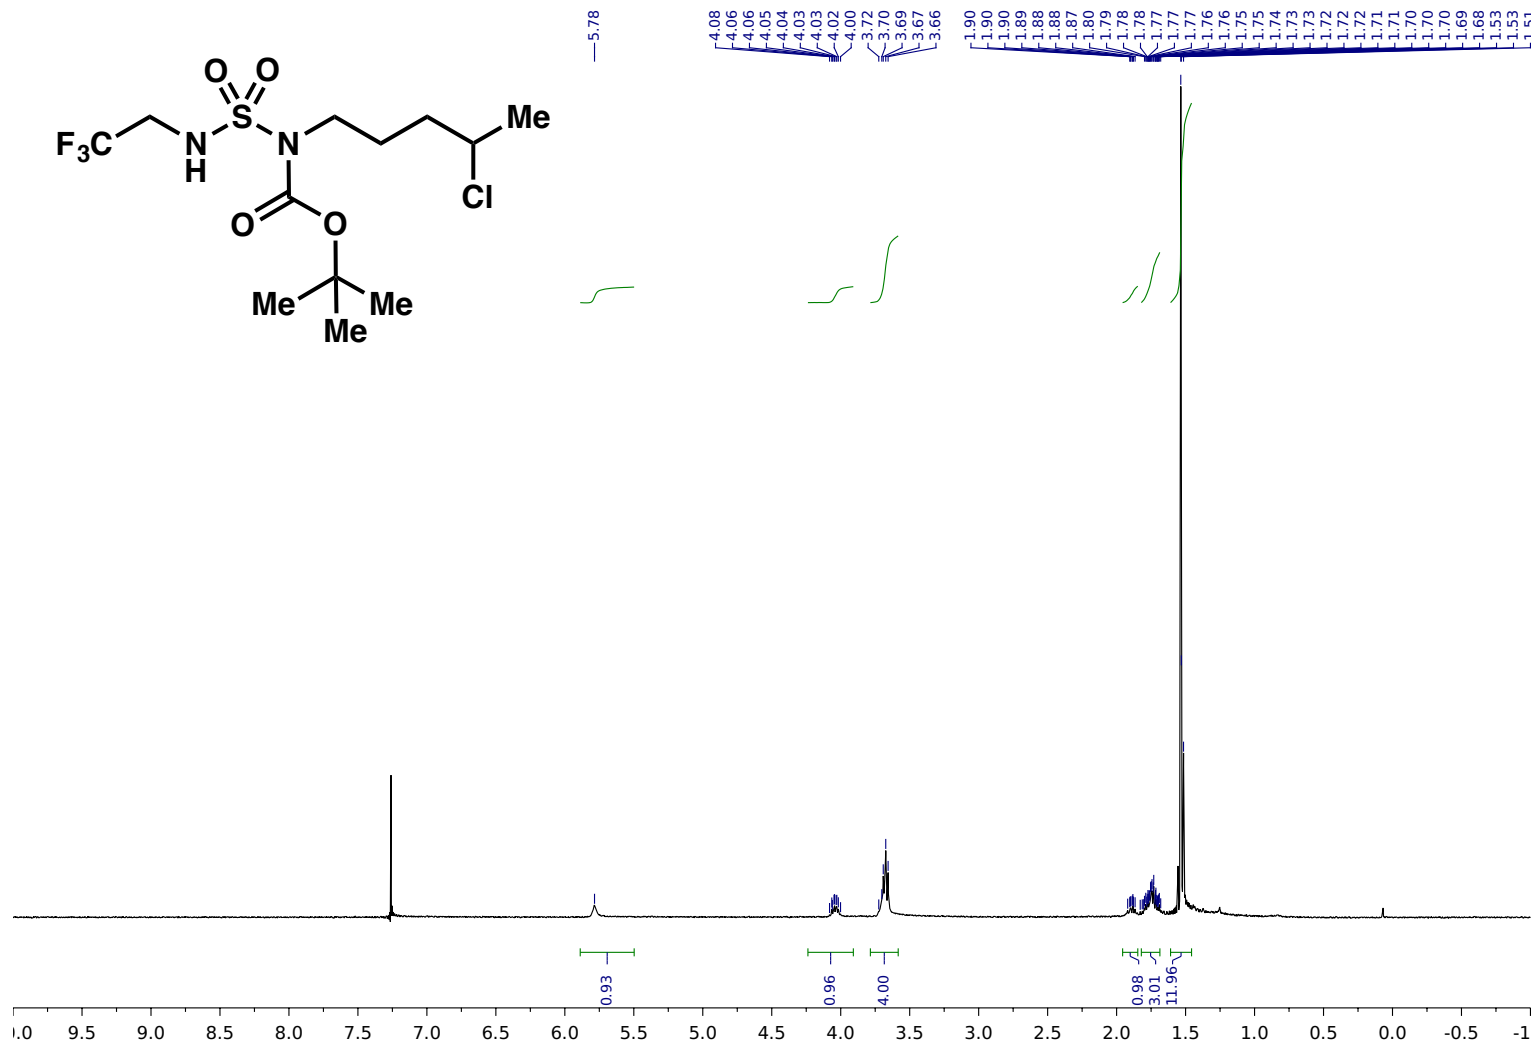

<sup>1</sup>H NMR (400 MHz, CDCl<sub>3</sub>) for *N-tert-butoxycarbonyl-N-(4-chloropent-1-yl)-N'-(2,2,2-trifluoroethyl)sulfamide* (S12v)

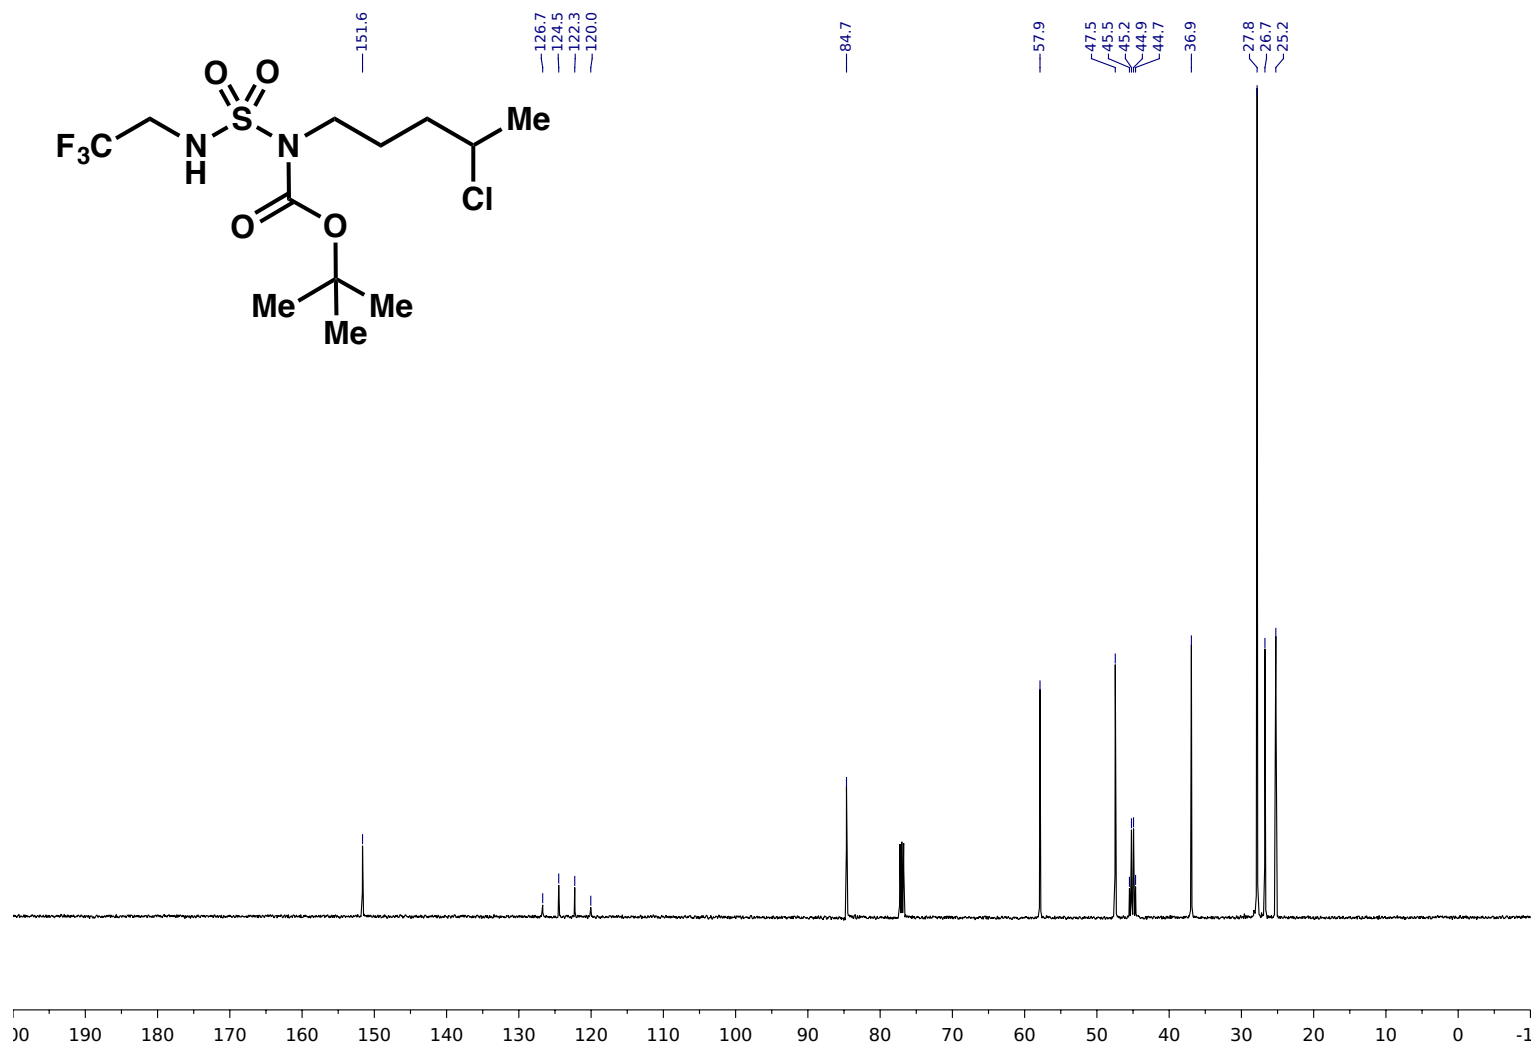

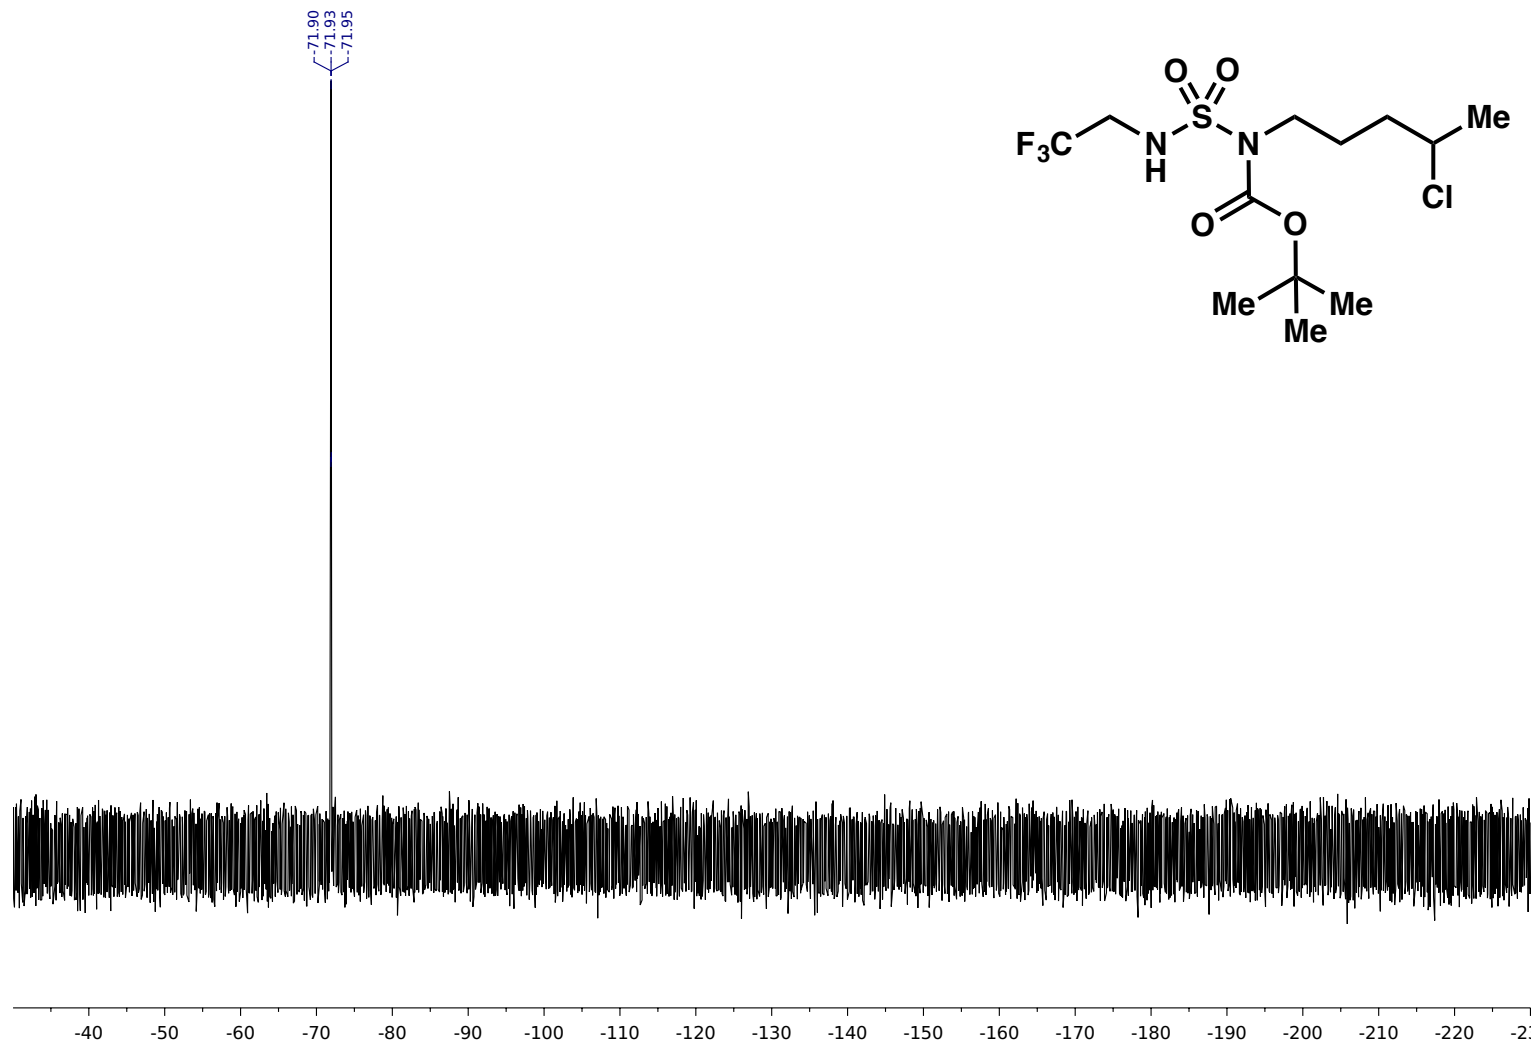

$^{19}\text{F}$  NMR (376 MHz,  $\text{CDCl}_3$ ) for *N*-*tert*-butoxycarbonyl-*N*-(4-chloropent-1-yl)-*N'*-(2,2,2-trifluoroethyl)sulfamide (S12v)

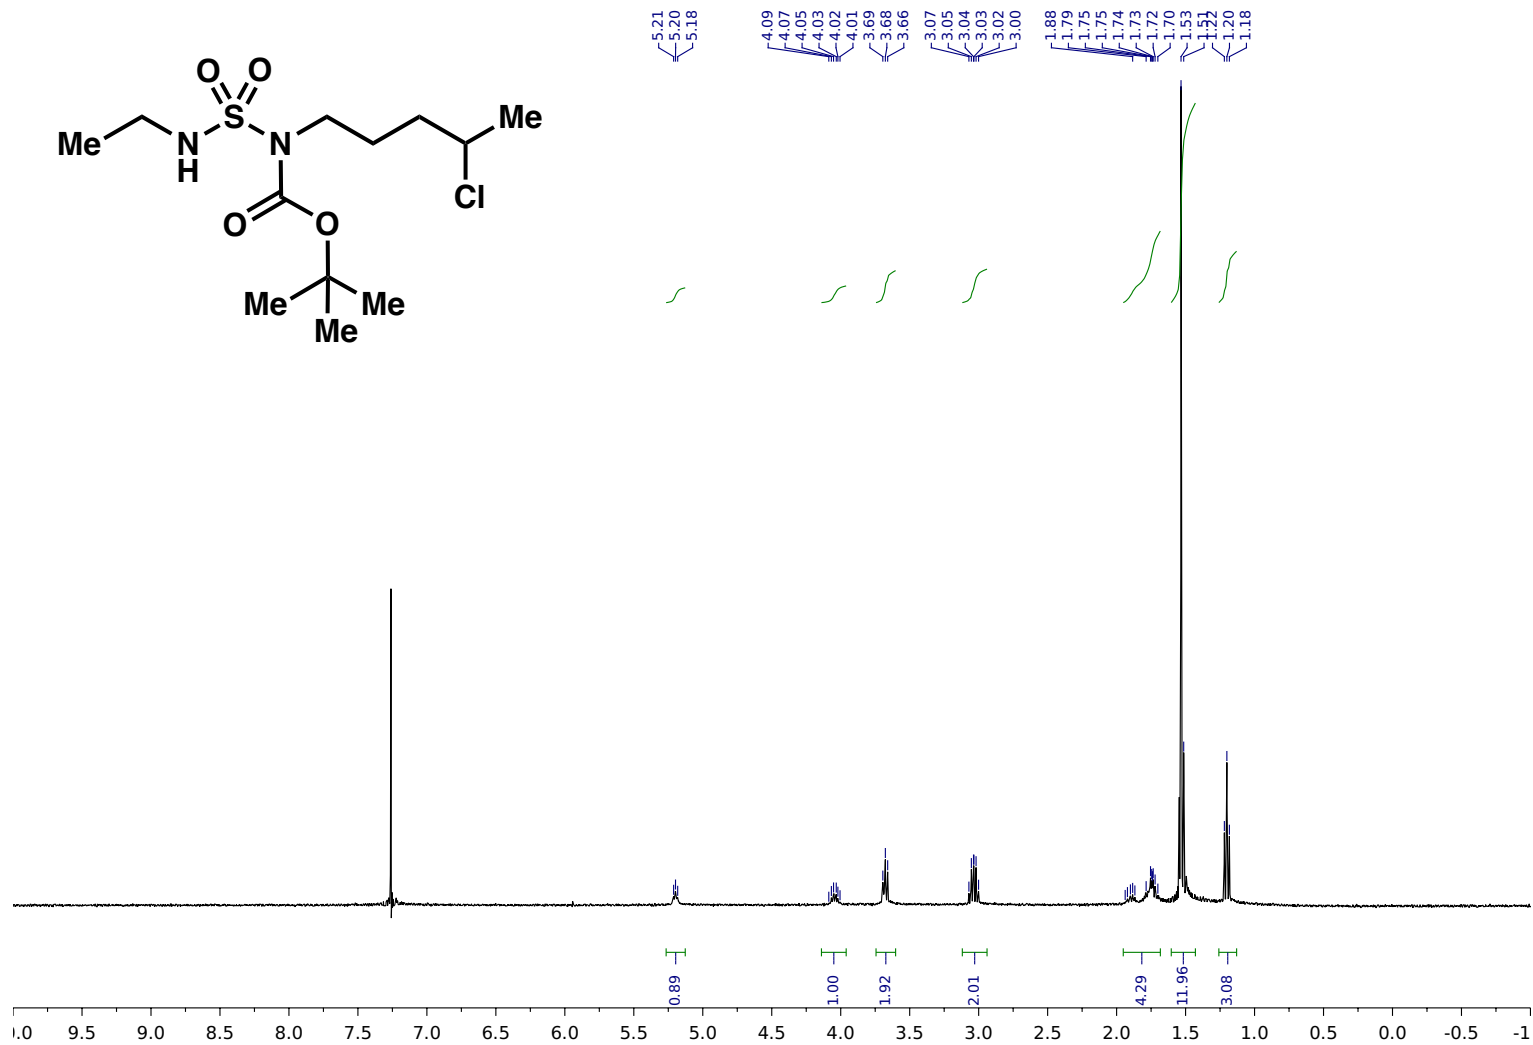

<sup>1</sup>H NMR (400 MHz, CDCl<sub>3</sub>) for *N*-tert-butoxycarbonyl-*N*-(4-chloropent-1-yl)-*N'*-ethylsulfamide (S12w)

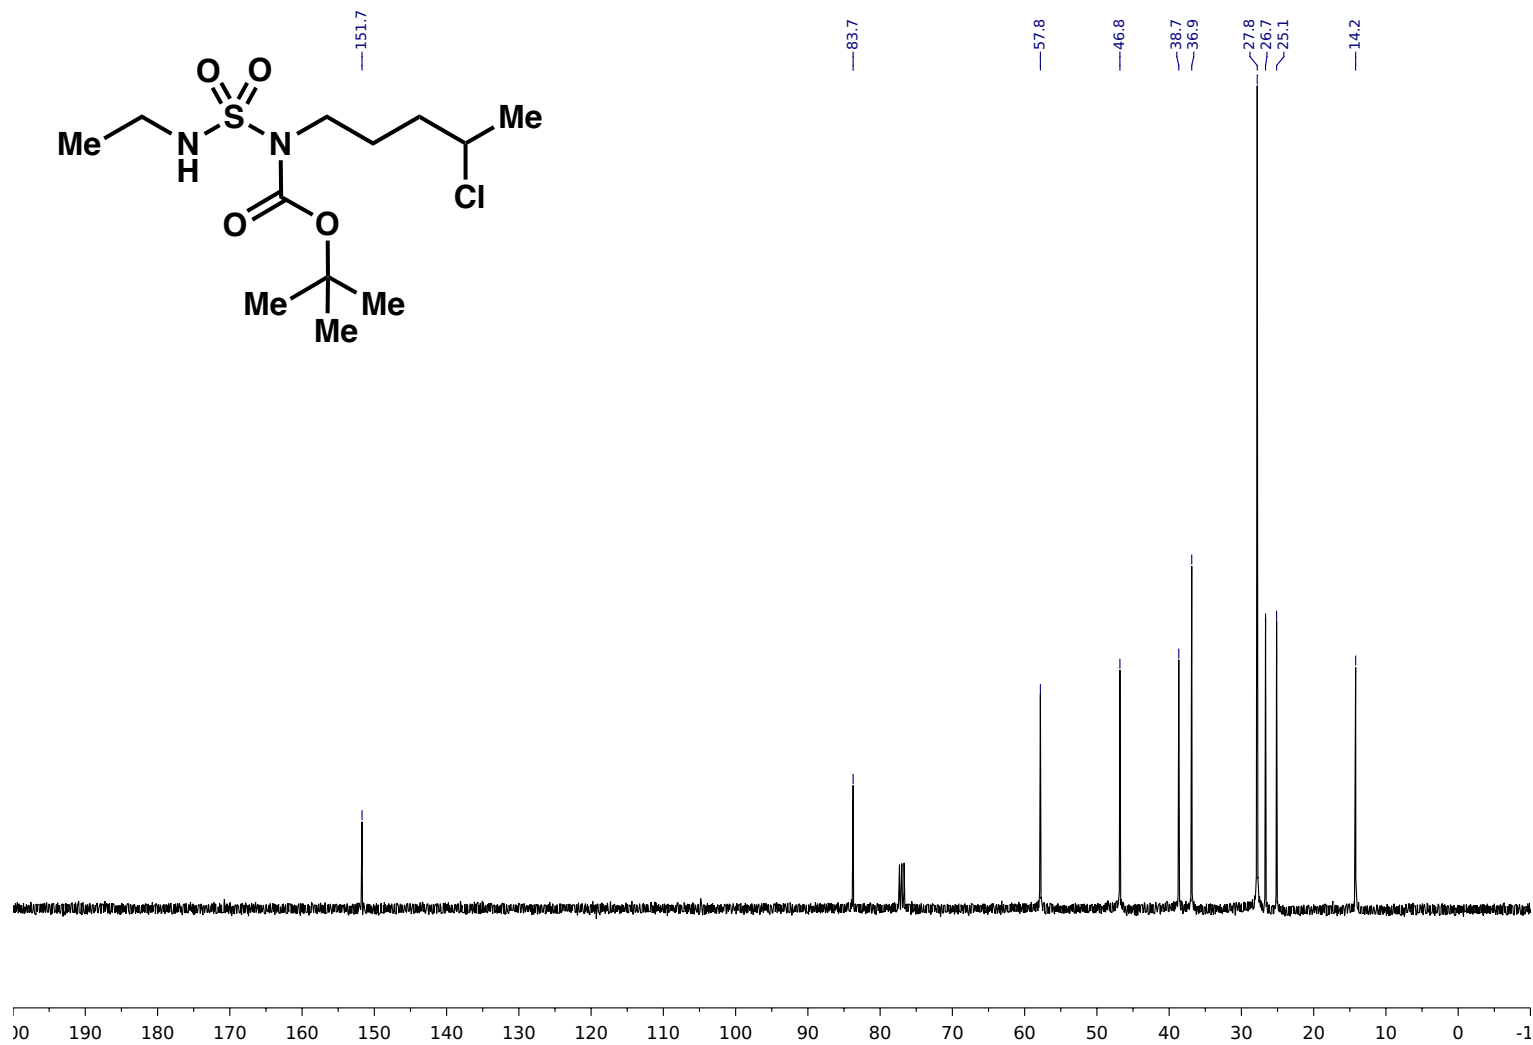

<sup>13</sup>C NMR (126 MHz, CDCl<sub>3</sub>) for *N-tert*-butoxycarbonyl-*N*-(4-chloropent-1-yl)-*N'*-ethylsulfamide (S12w)

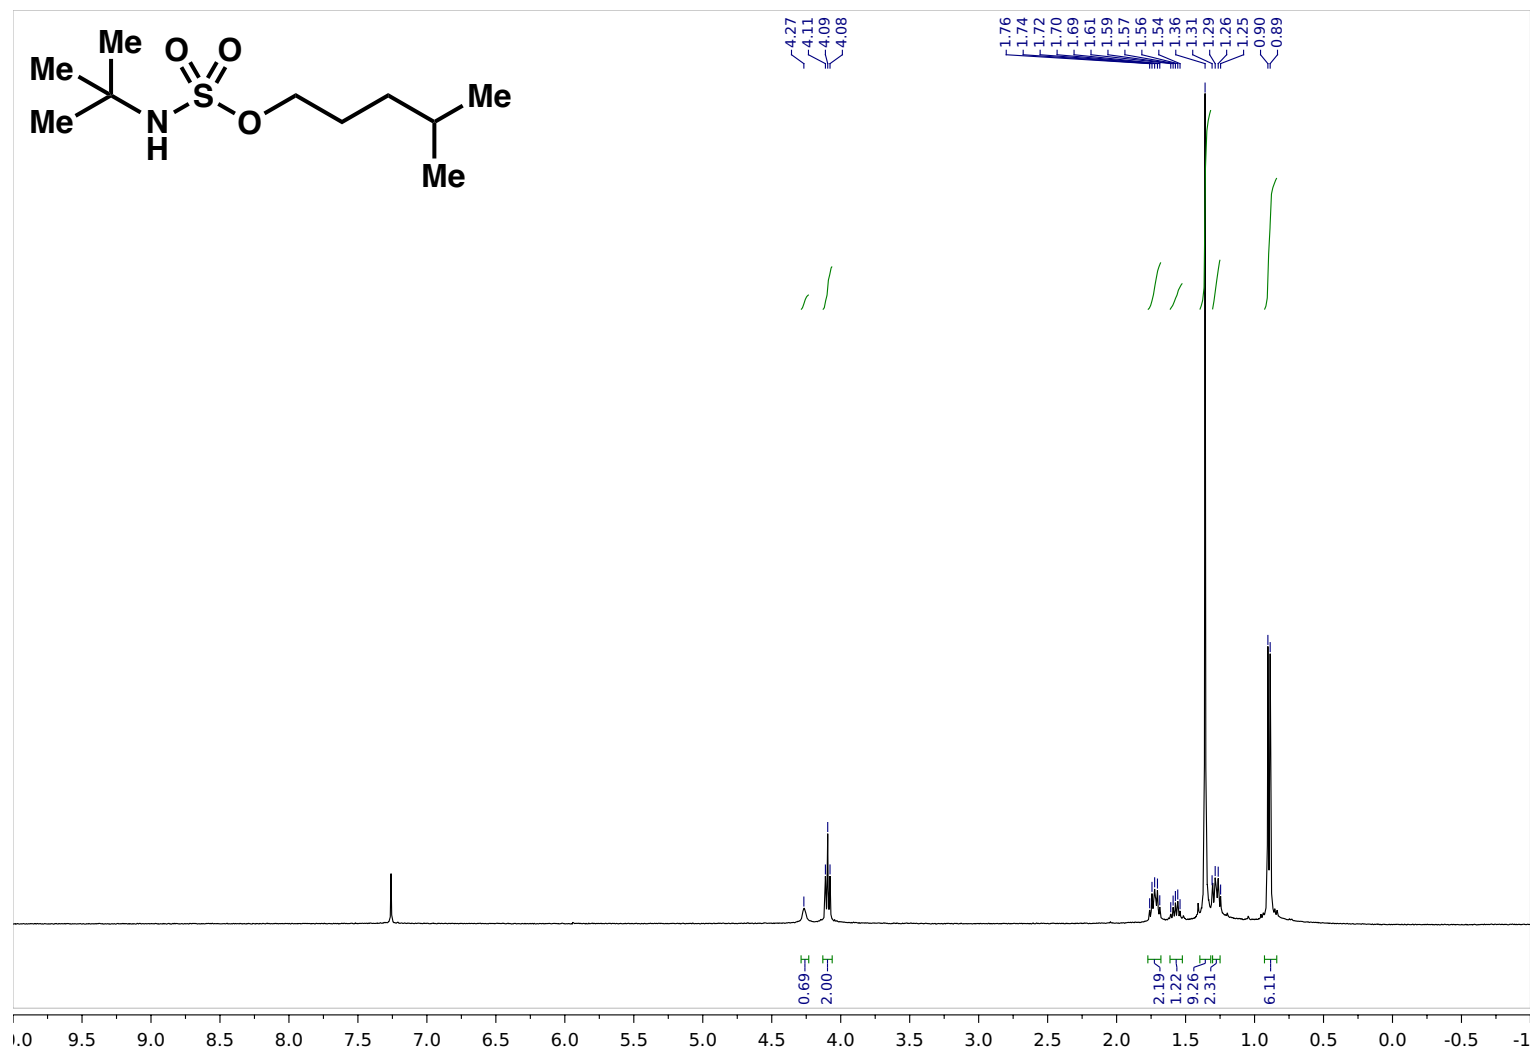

<sup>1</sup>H NMR (400 MHz, CDCl<sub>3</sub>) for 4-methylpentyl *tert*-butylsulfamate (S13a)

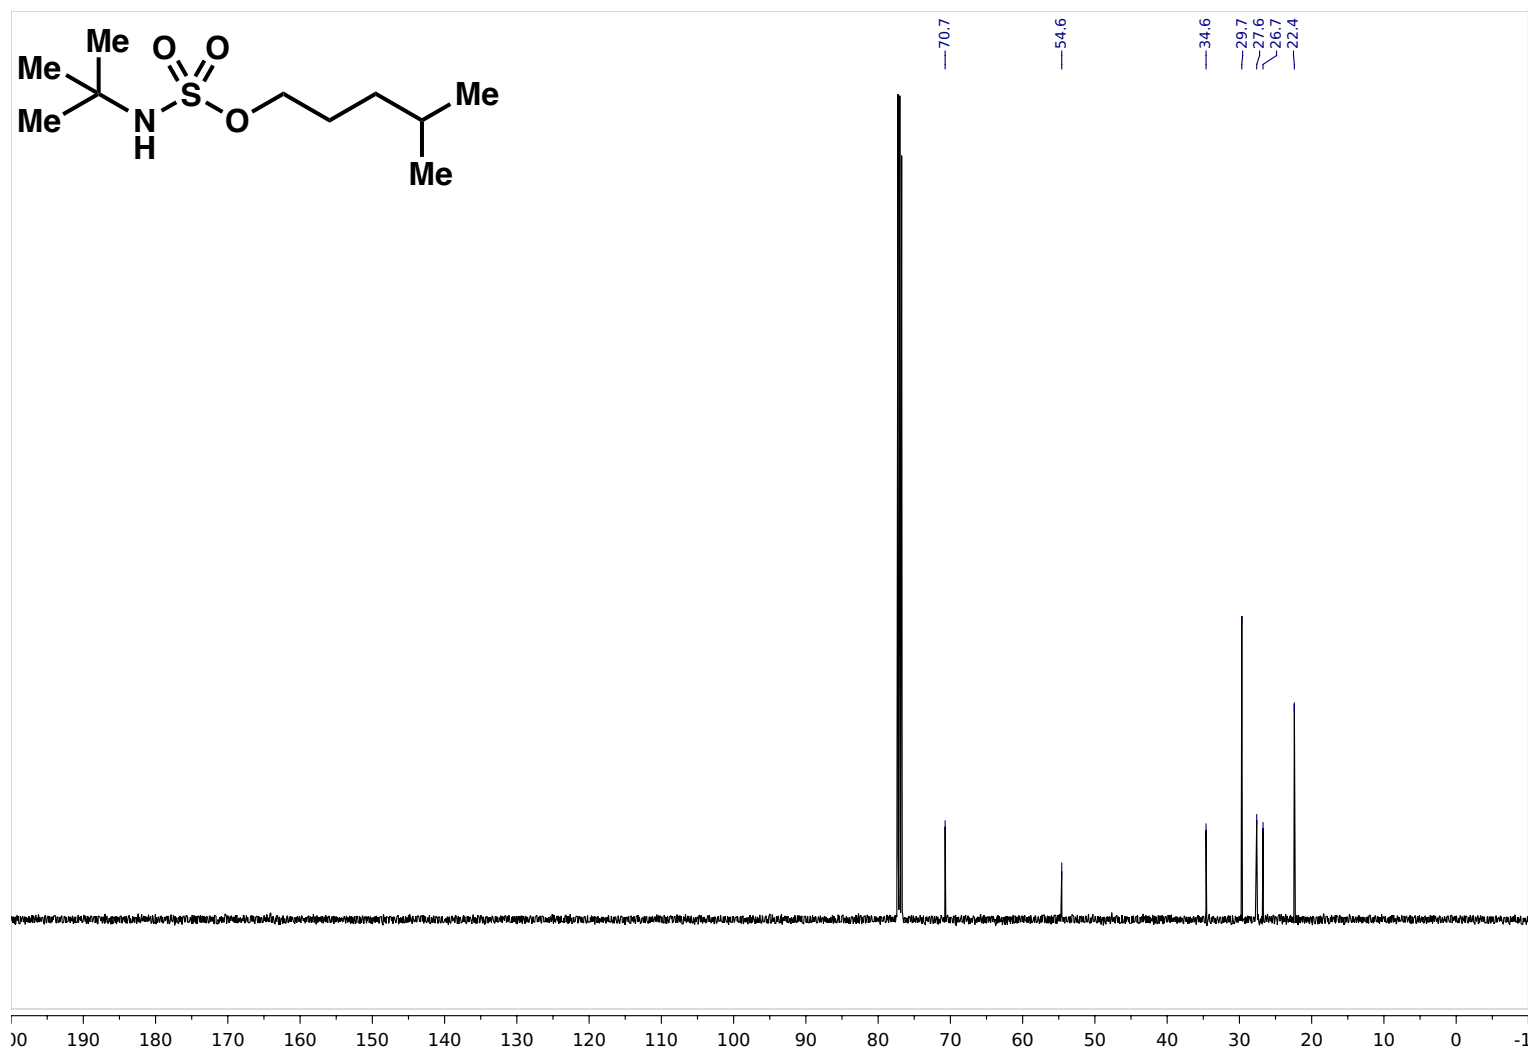

<sup>13</sup>C NMR (126 MHz, CDCl<sub>3</sub>) for 4-methylpentyl *tert*-butylsulfamate (S13a)

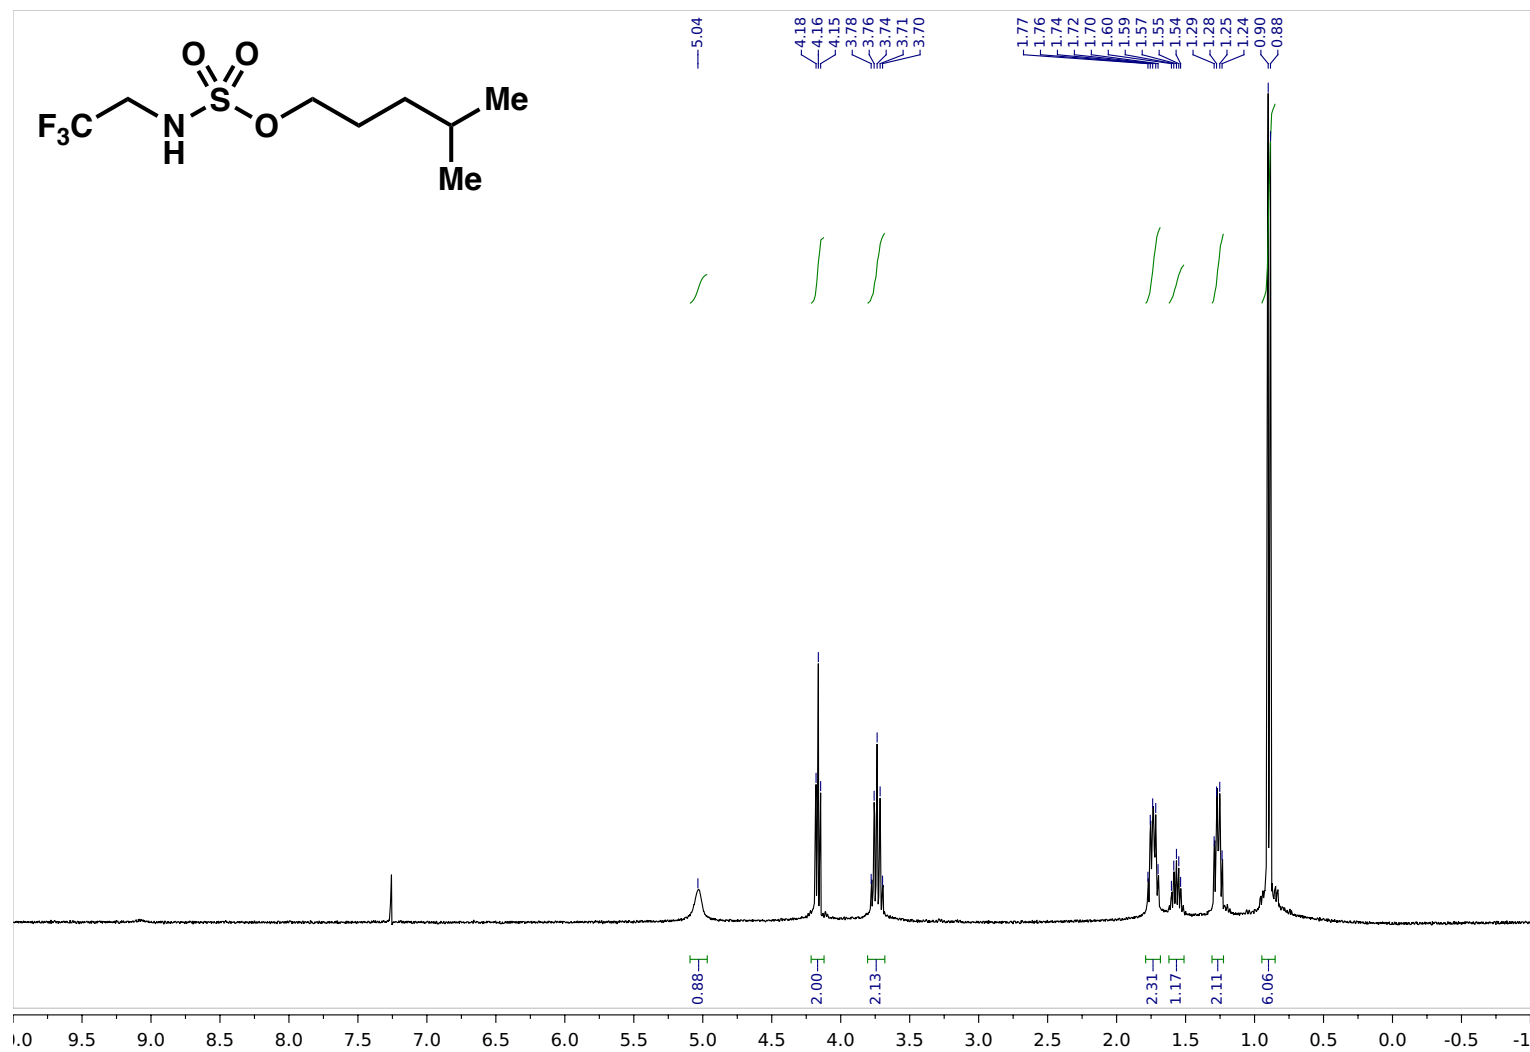

<sup>1</sup>H NMR (400 MHz, CDCl<sub>3</sub>) for 4-methylpentyl (2,2,2-trifluoroethyl)sulfamate (S13b)



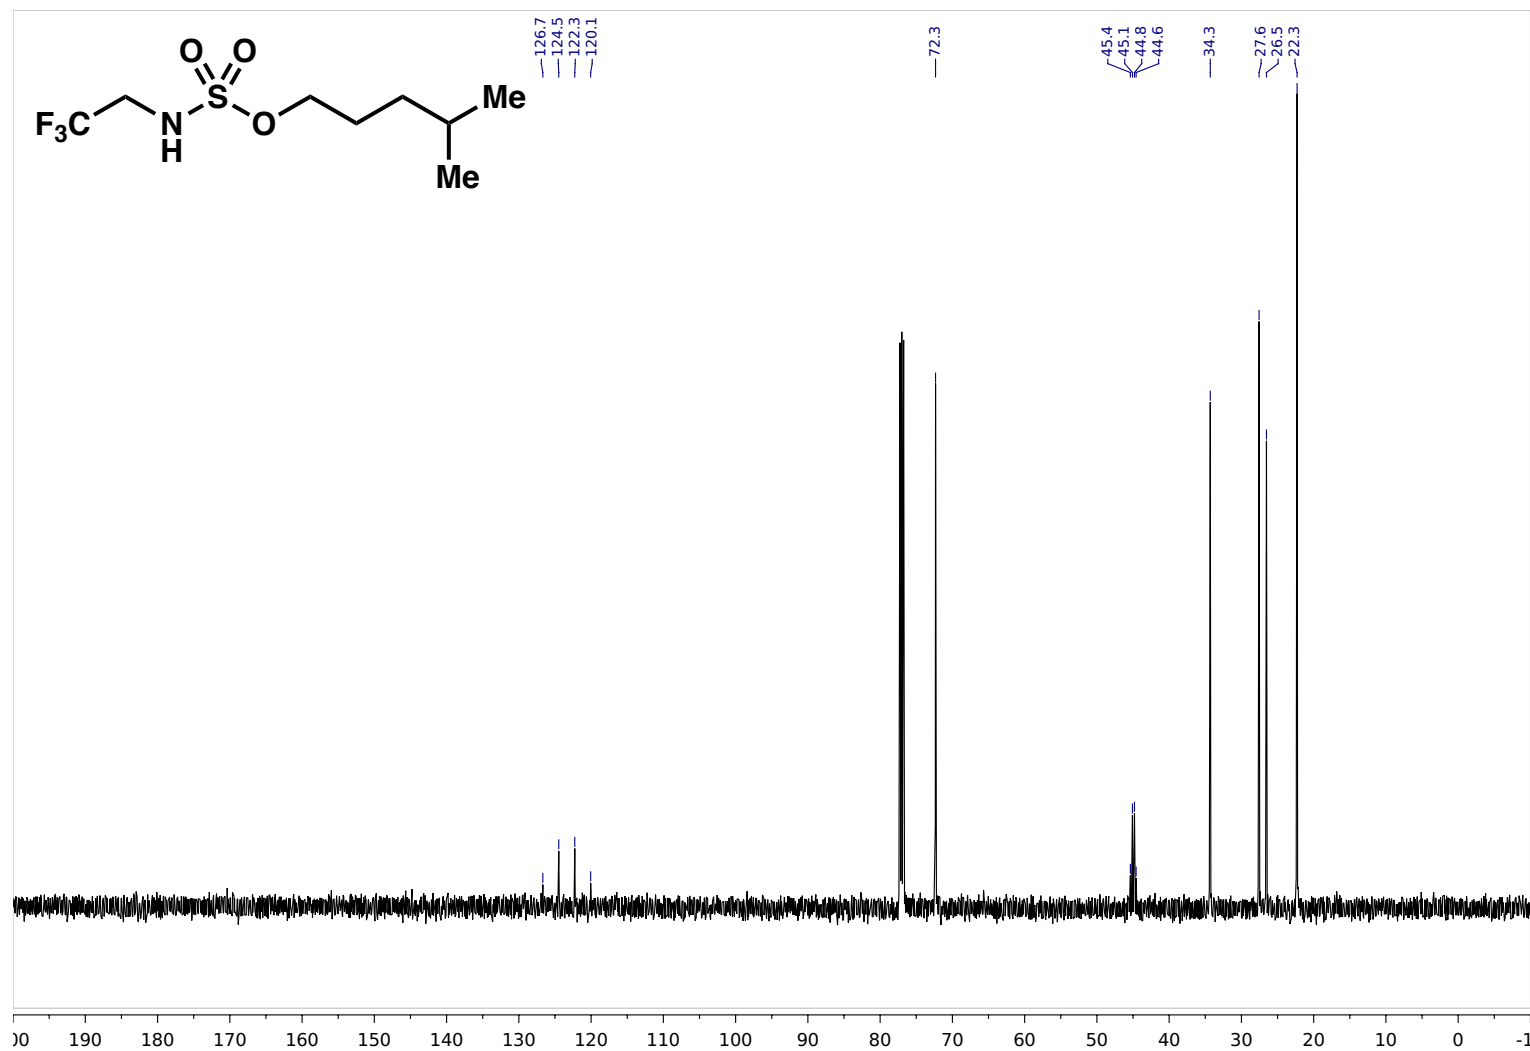

<sup>13</sup>C NMR (126 MHz, CDCl<sub>3</sub>) for 4-methylpentyl (2,2,2-trifluoroethyl)sulfamate (**S13b**)

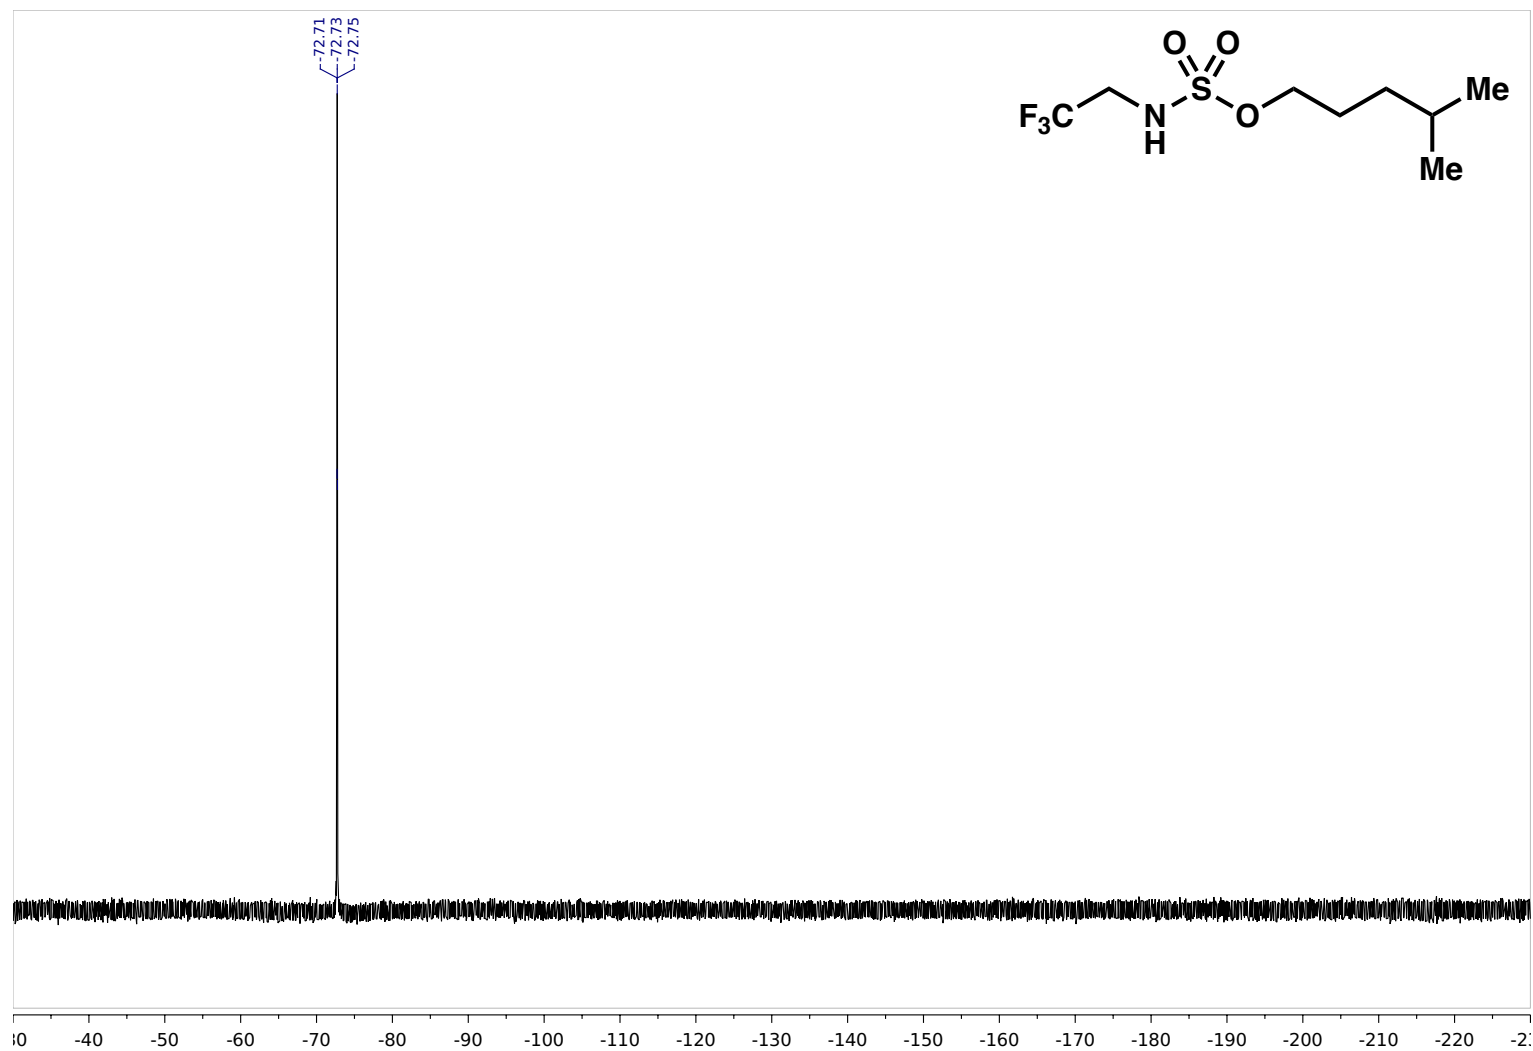

$^{19}\text{F}$  NMR (376 MHz,  $\text{CDCl}_3$ ) for 4-methylpentyl (2,2,2-trifluoroethyl)sulfamate (**S13b**)

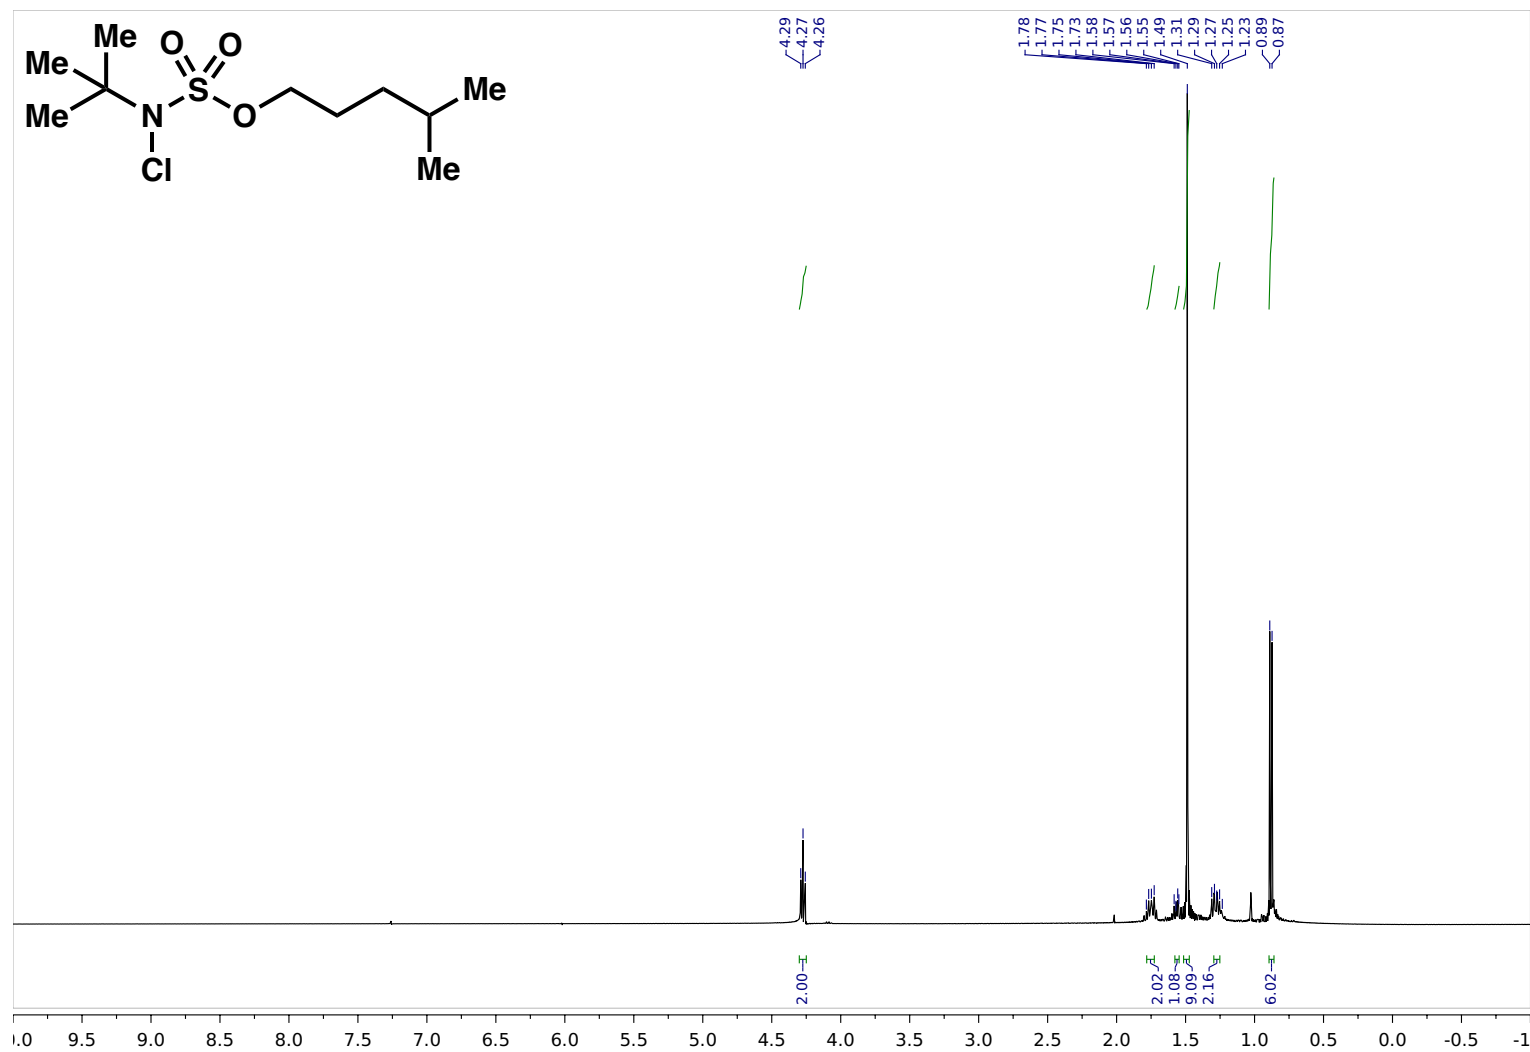

<sup>1</sup>H NMR (400 MHz, CDCl<sub>3</sub>) for 4-methylpentyl *tert*-butylchlorosulfamate ester (**9a**)

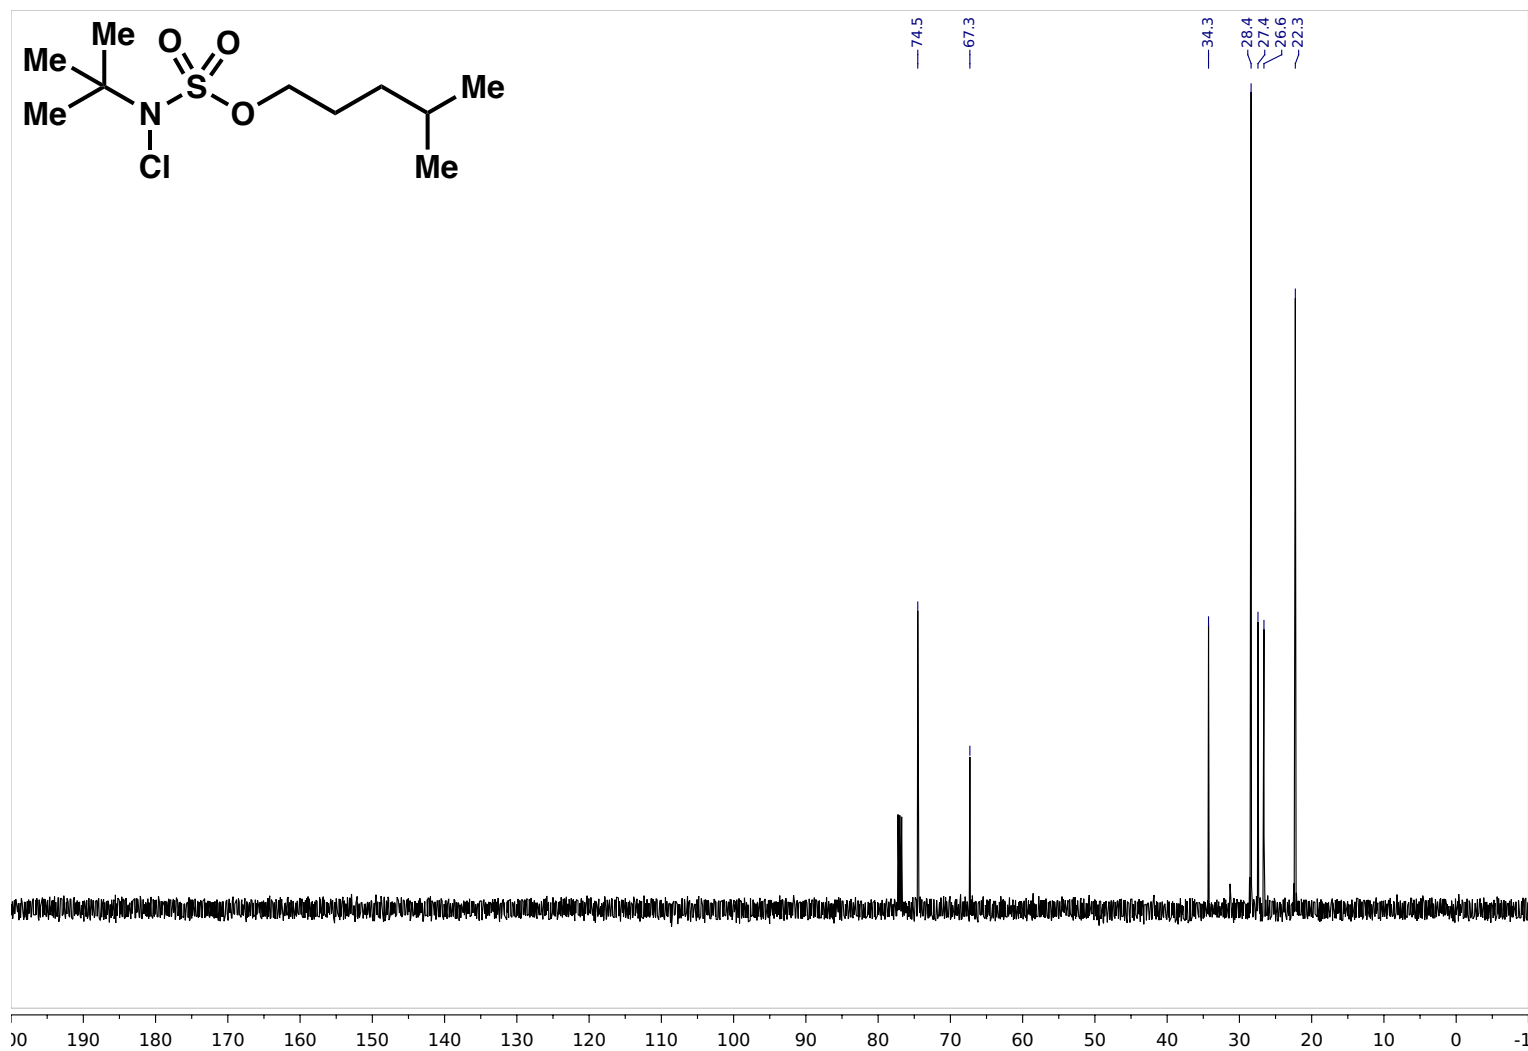

<sup>13</sup>C NMR (126 MHz, CDCl<sub>3</sub>) for 4-methylpentyl *tert*-butylchlorosulfamate ester (**9a**)

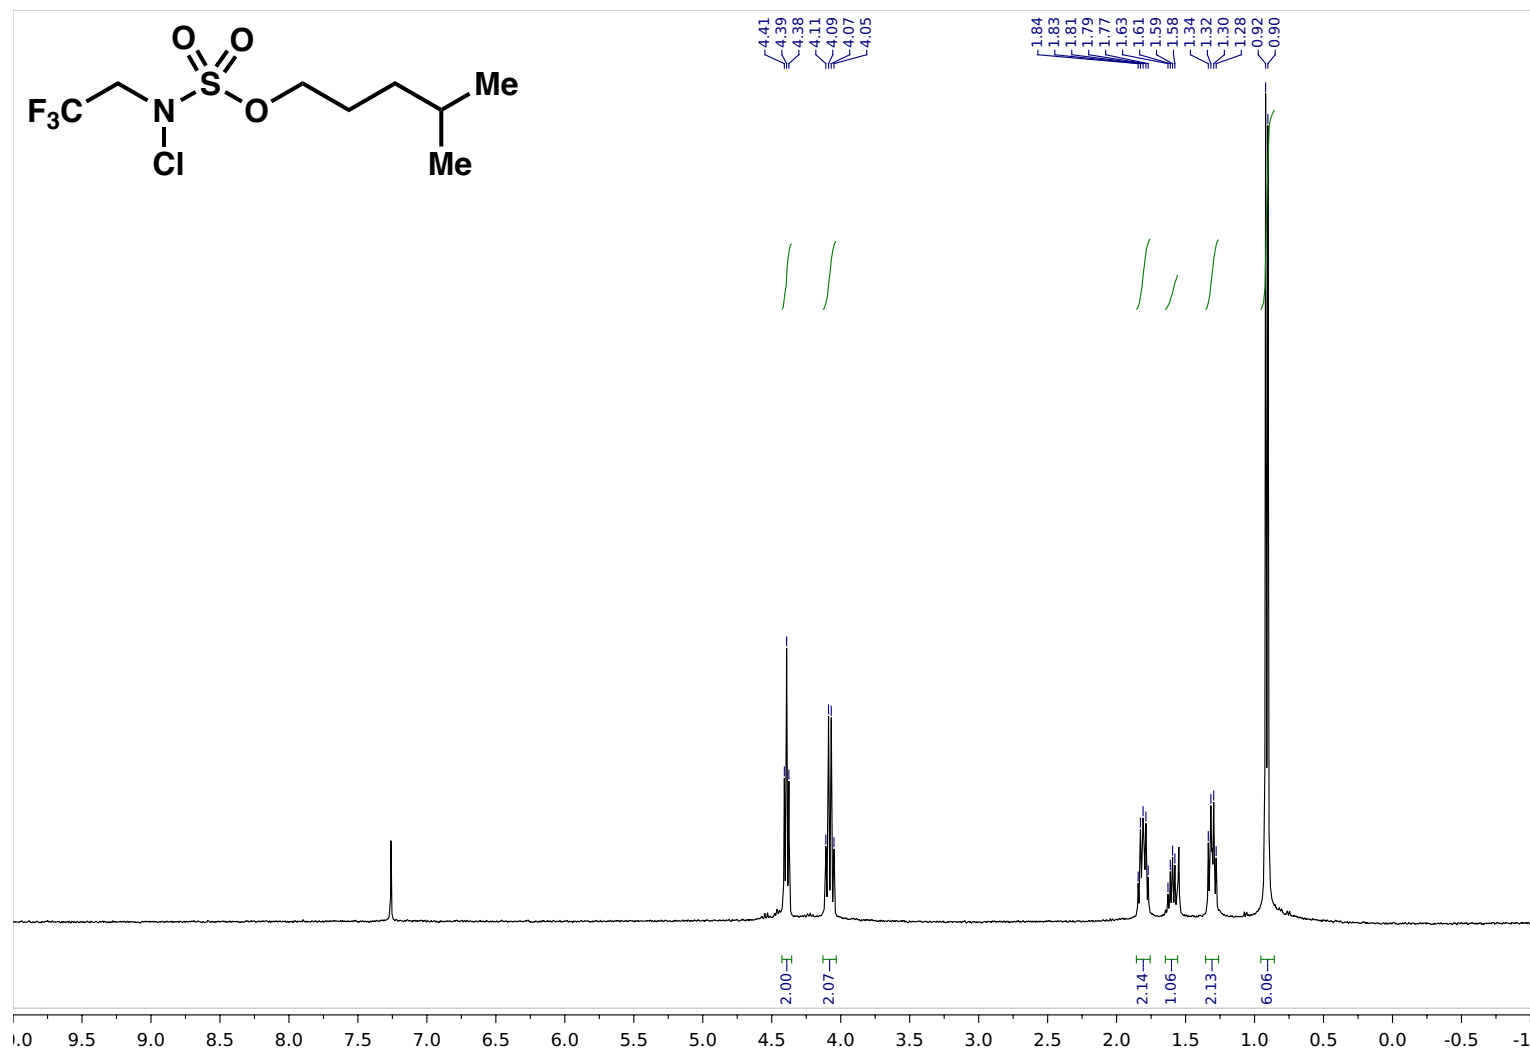

<sup>1</sup>H NMR (400 MHz, CDCl<sub>3</sub>) for 4-methylpentyl (2,2,2-trifluoroethyl)chlorosulfamate ester (**9b**)

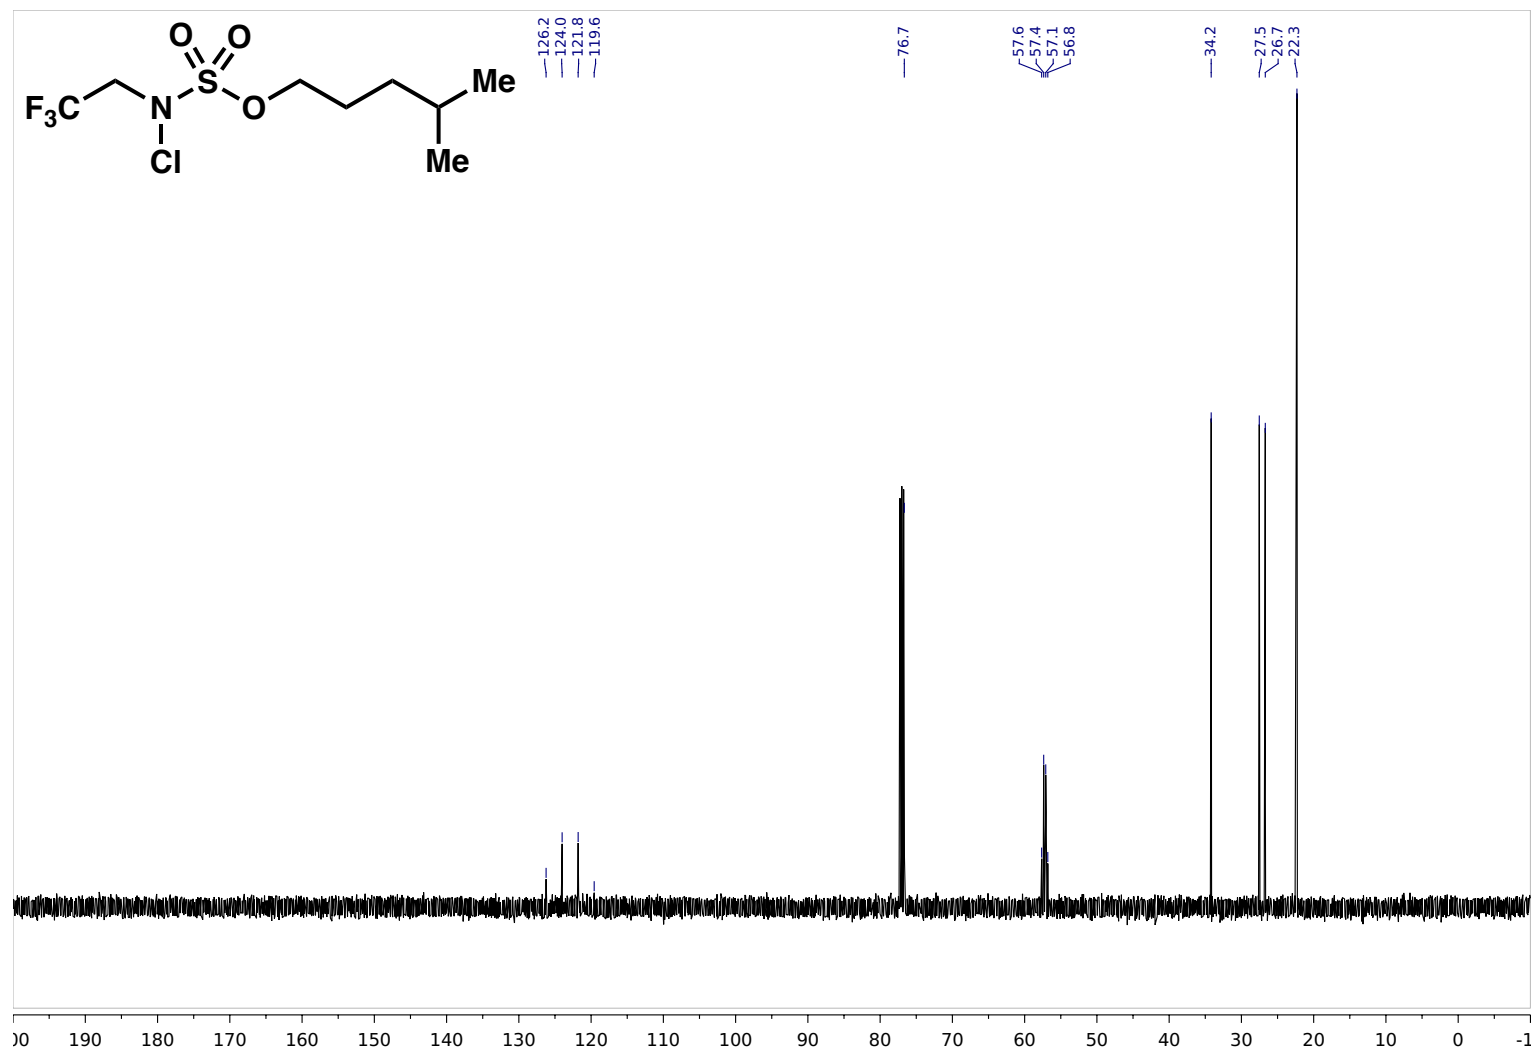

<sup>13</sup>C NMR (126 MHz, CDCl<sub>3</sub>) for 4-methylpentyl (2,2,2-trifluoroethyl)chlorosulfamate ester (**9b**)

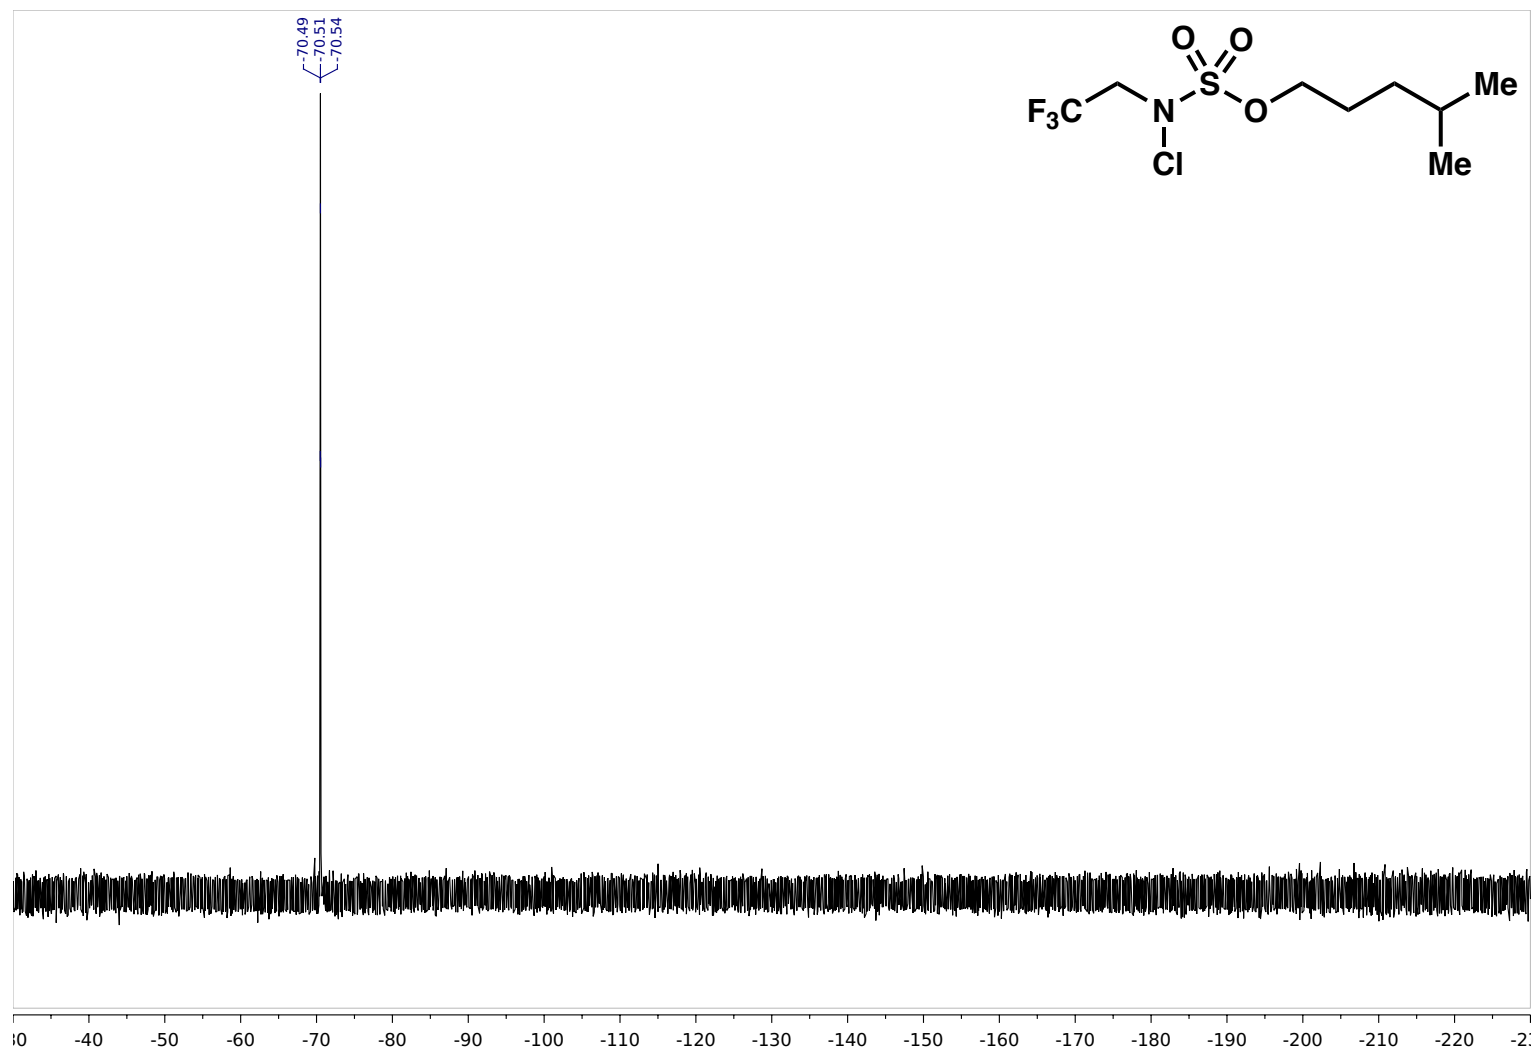

$^{19}\text{F}$  NMR (376 MHz,  $\text{CDCl}_3$ ) for 4-methylpentyl (2,2,2-trifluoroethyl)chlorosulfamate ester (**9b**)

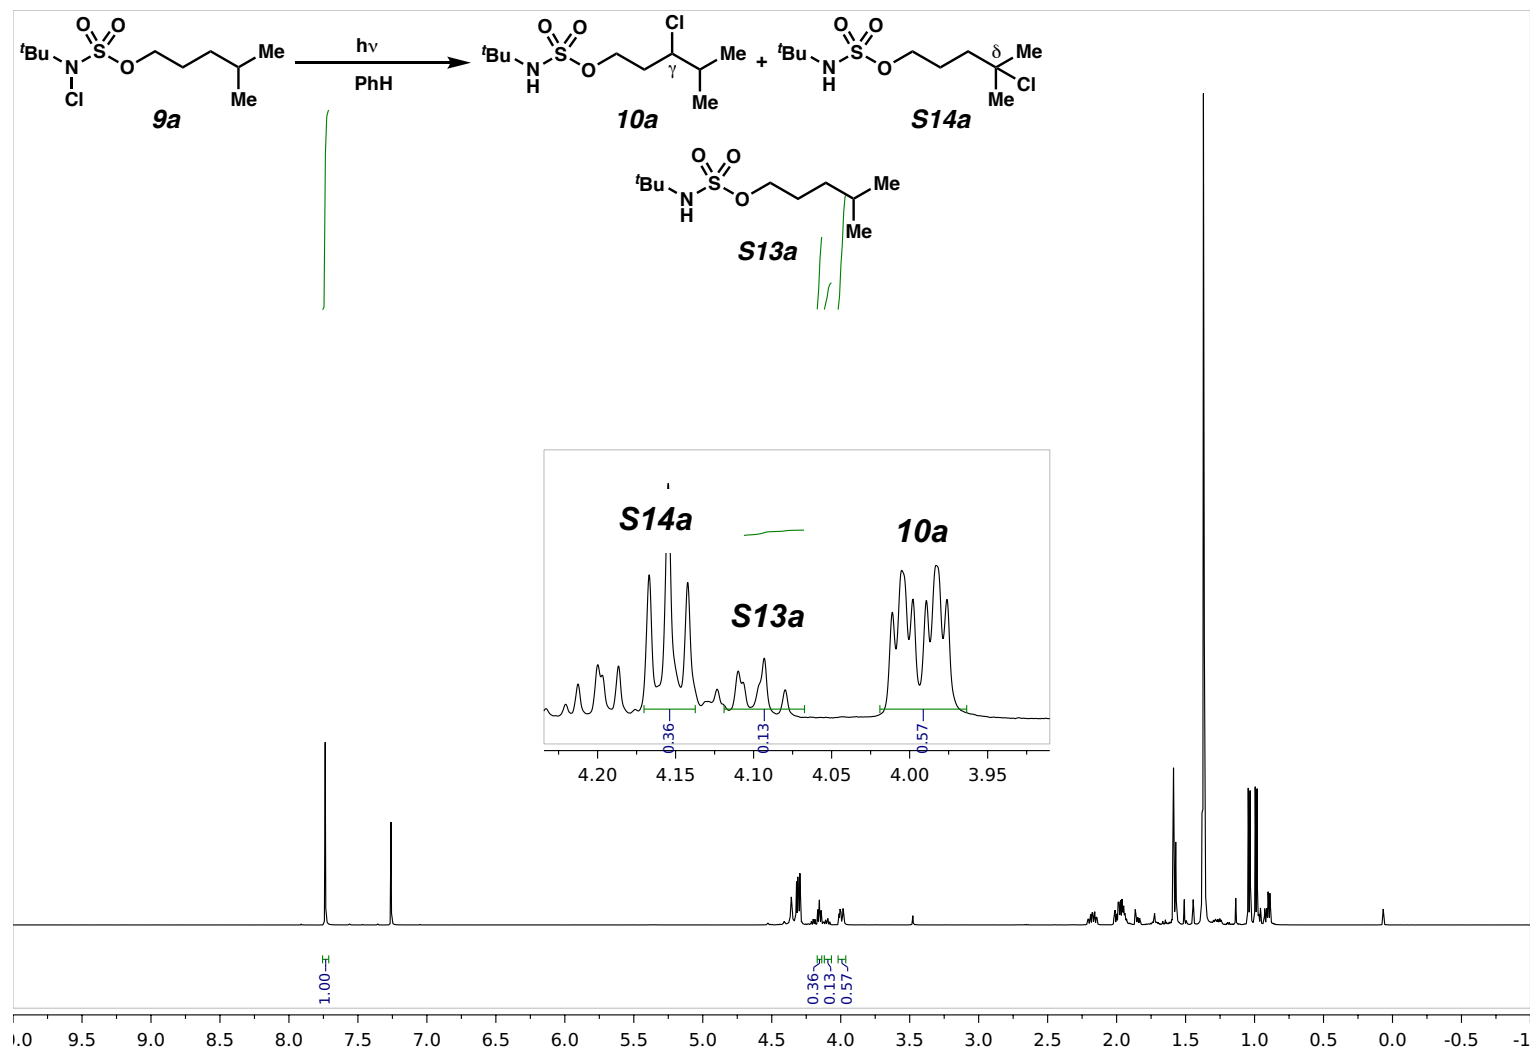

Crude  $^1\text{H}$  NMR (500 MHz,  $\text{CDCl}_3$ , 25s relaxation delay) for chlorine-transfer reaction of *N*-chlorosulfamate **9a**



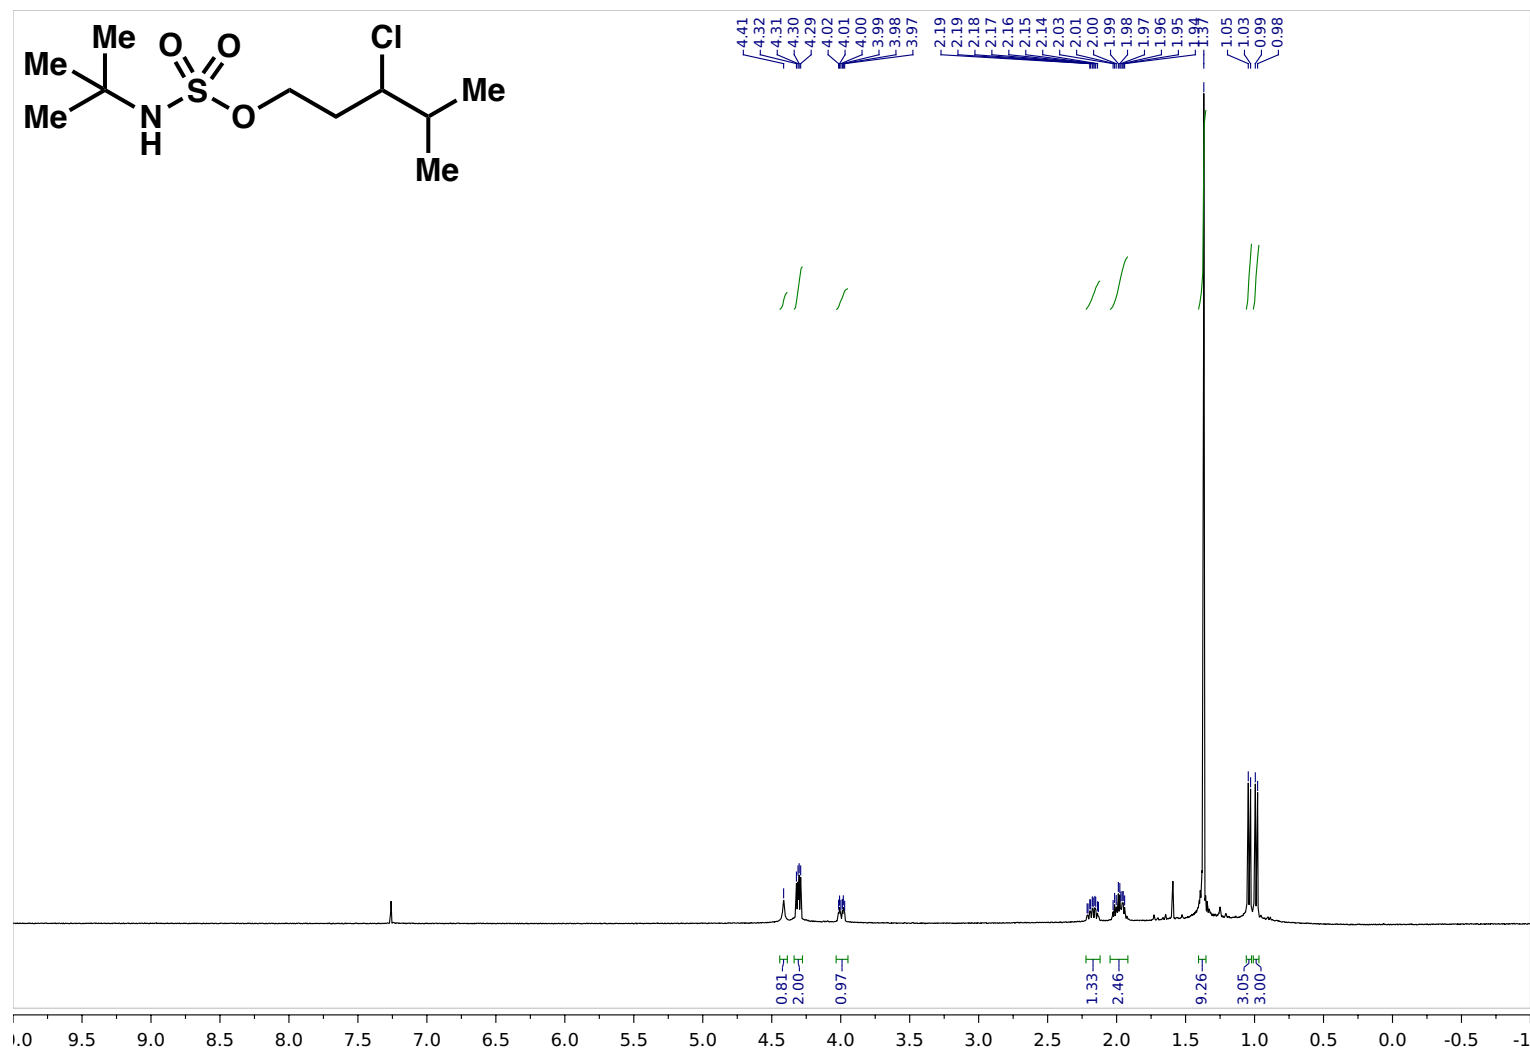

<sup>1</sup>H NMR (400 MHz, CDCl<sub>3</sub>) for 3-chloro-4-methylpentyl *tert*-butylsulfamate (10a)

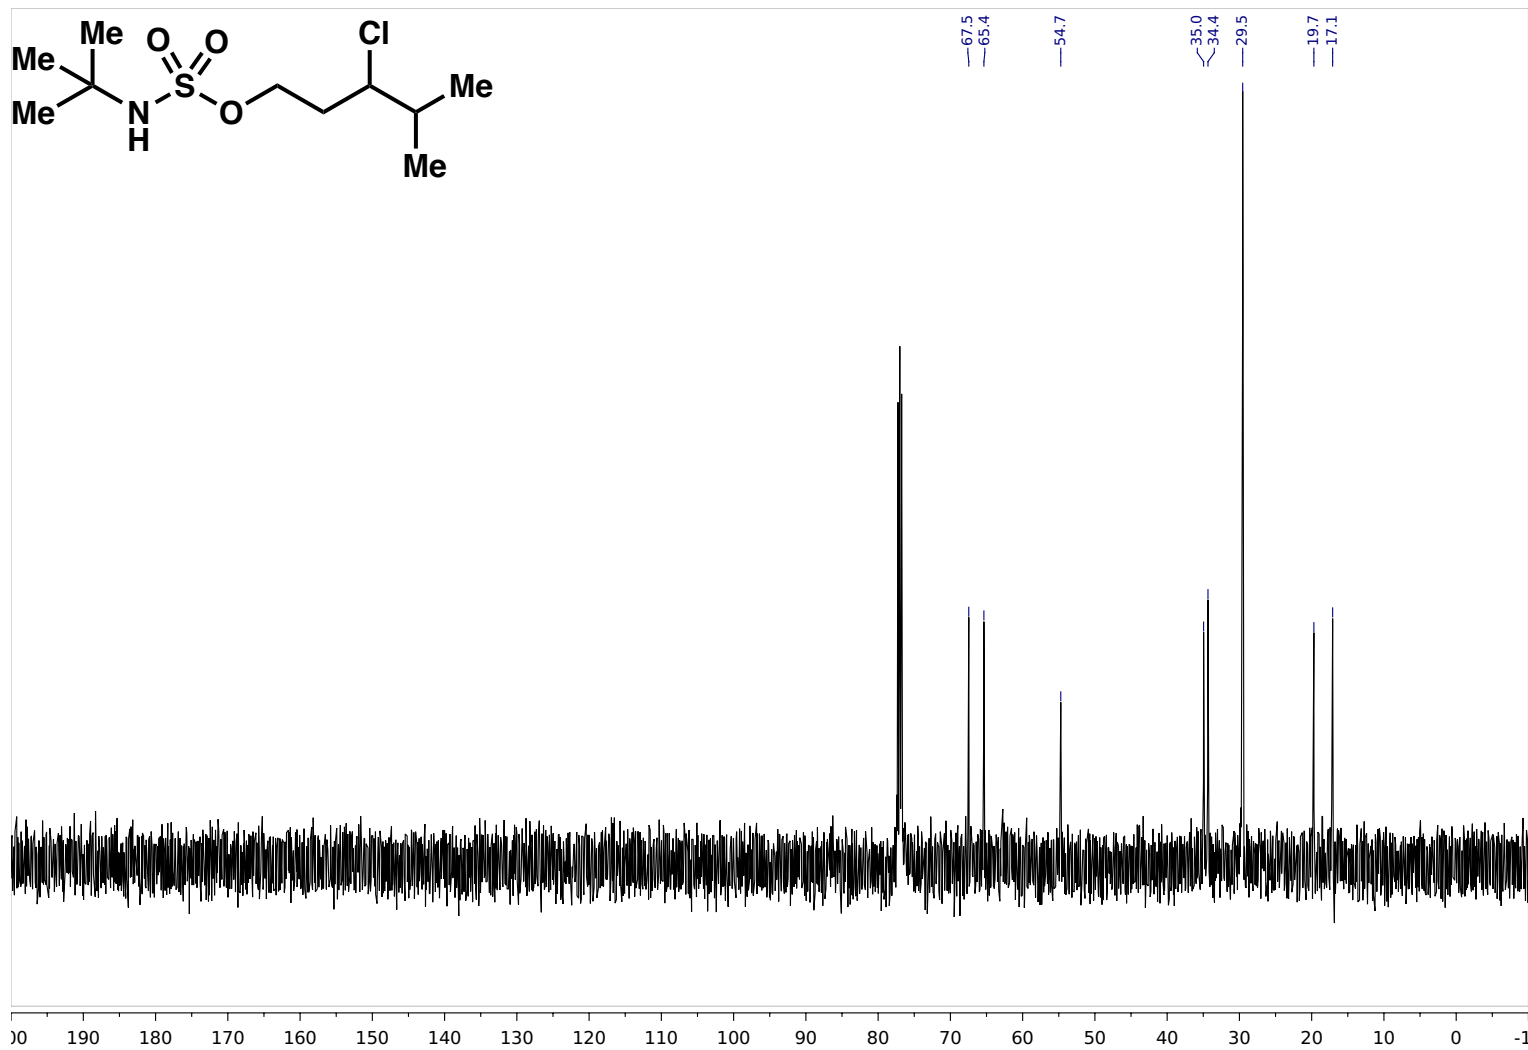

<sup>13</sup>C NMR (126 MHz, CDCl<sub>3</sub>) for 3-chloro-4-methylpentyl *tert*-butylsulfamate (**10a**)

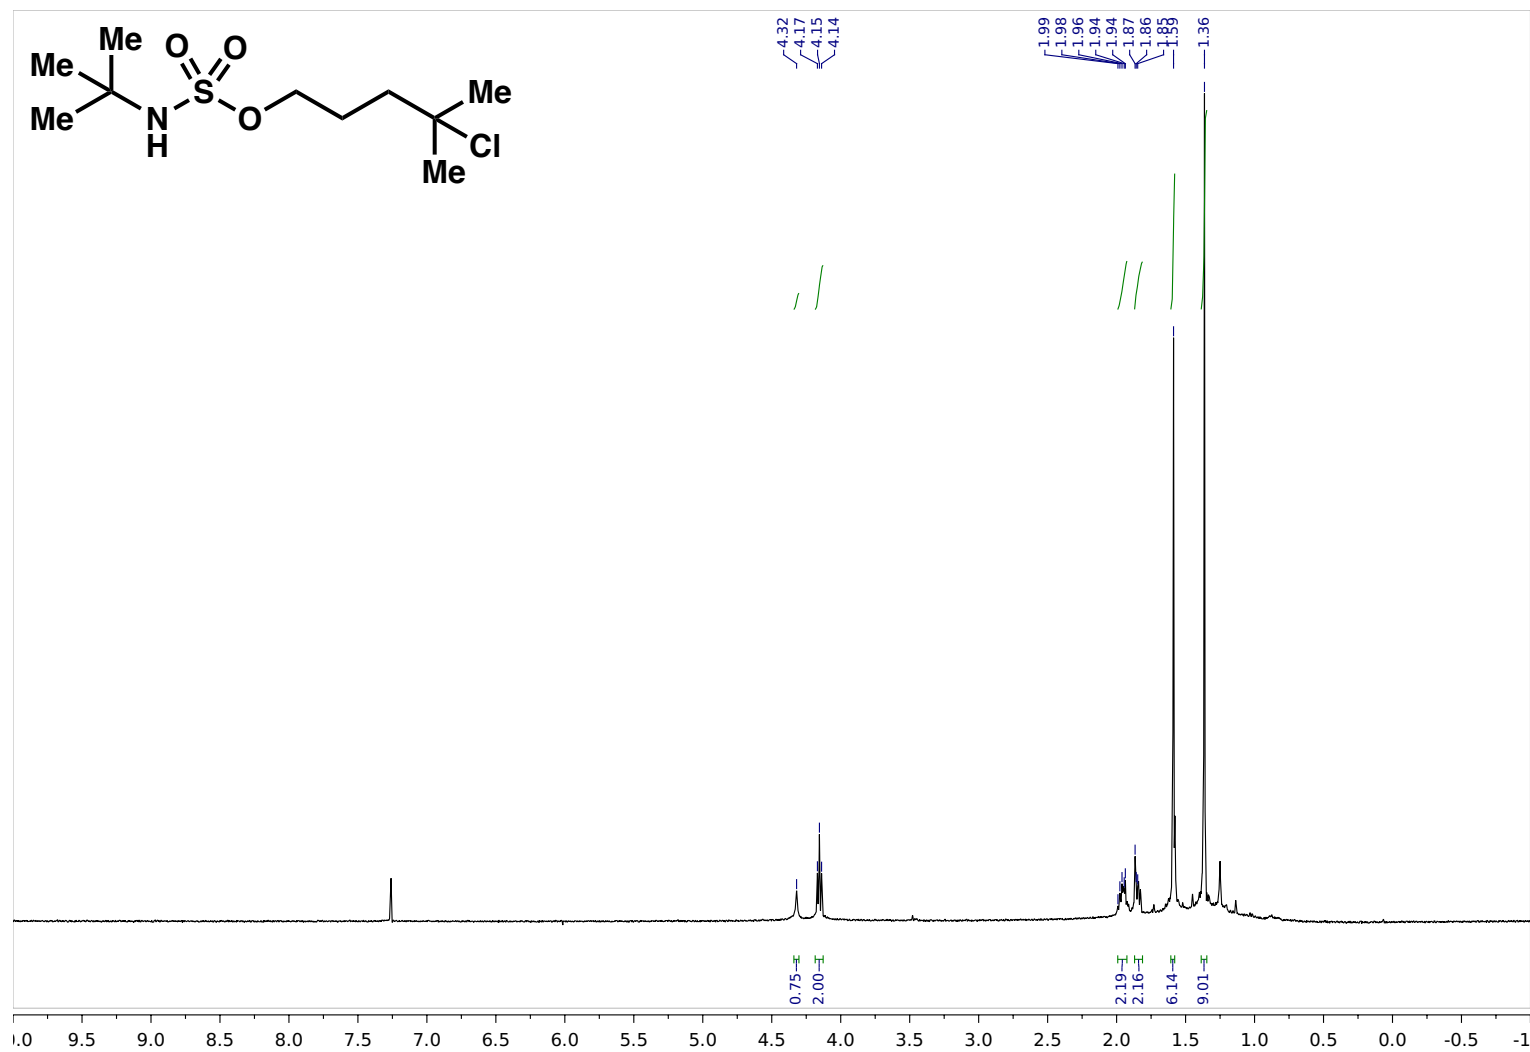

<sup>1</sup>H NMR (400 MHz, CDCl<sub>3</sub>) for 4-chloro-4-methylpentyl *tert*-butylsulfamate (S14a)

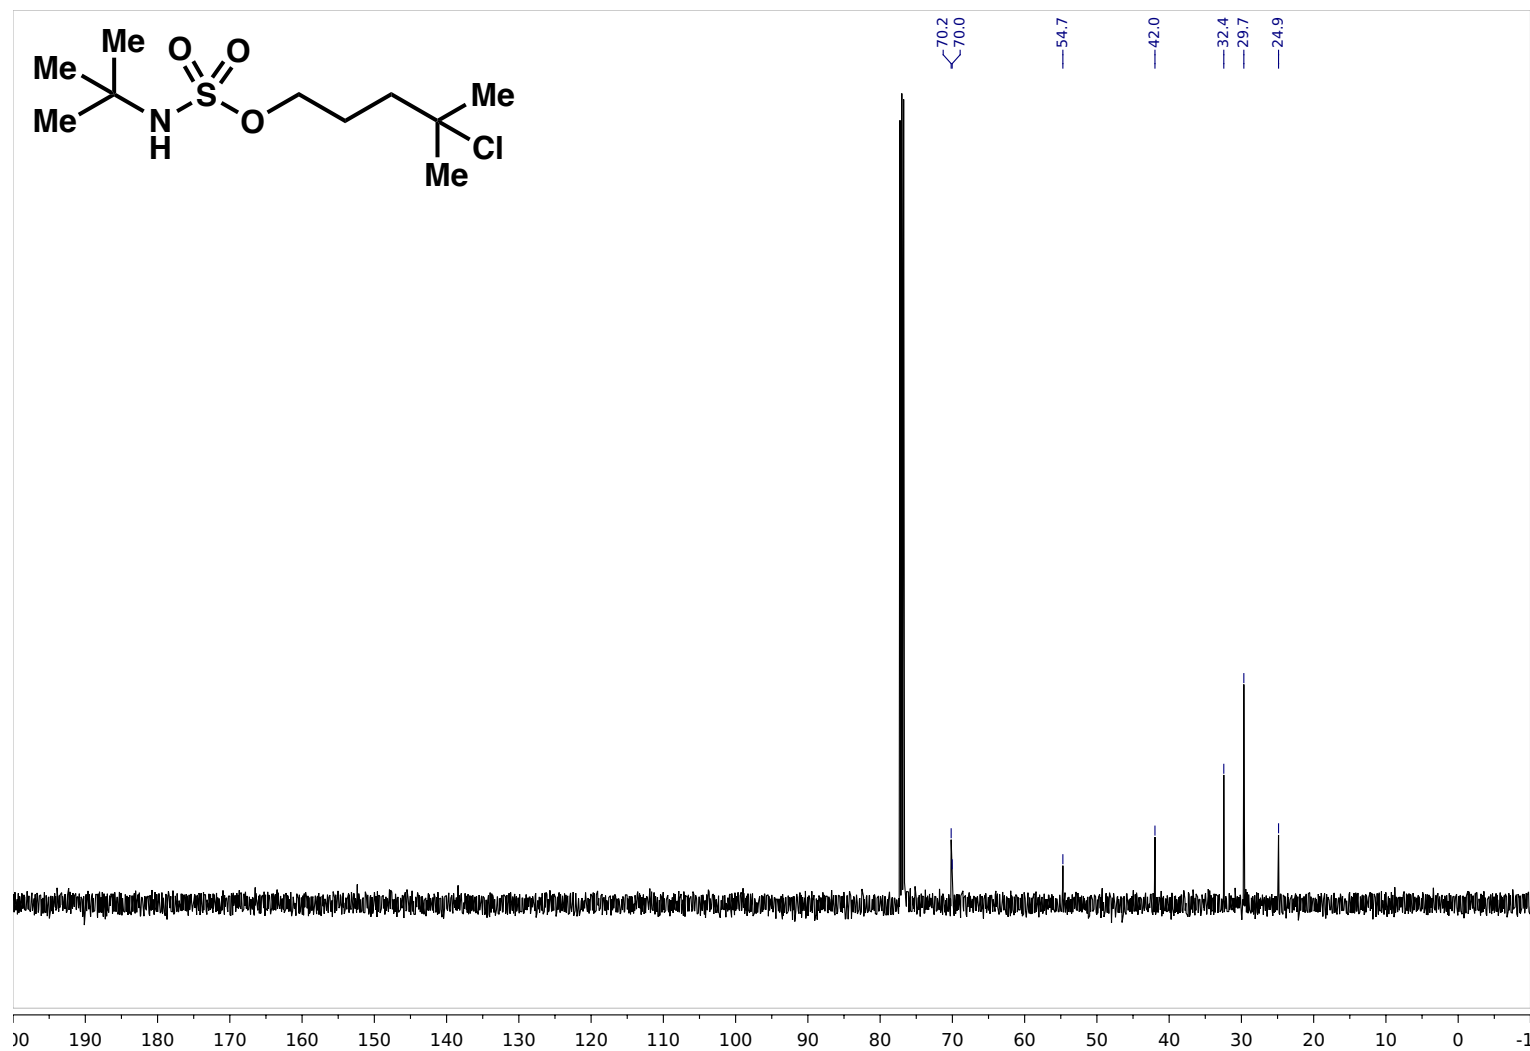

<sup>13</sup>C NMR (126 MHz, CDCl<sub>3</sub>) for 4-chloro-4-methylpentyl *tert*-butylsulfamate (S14a)

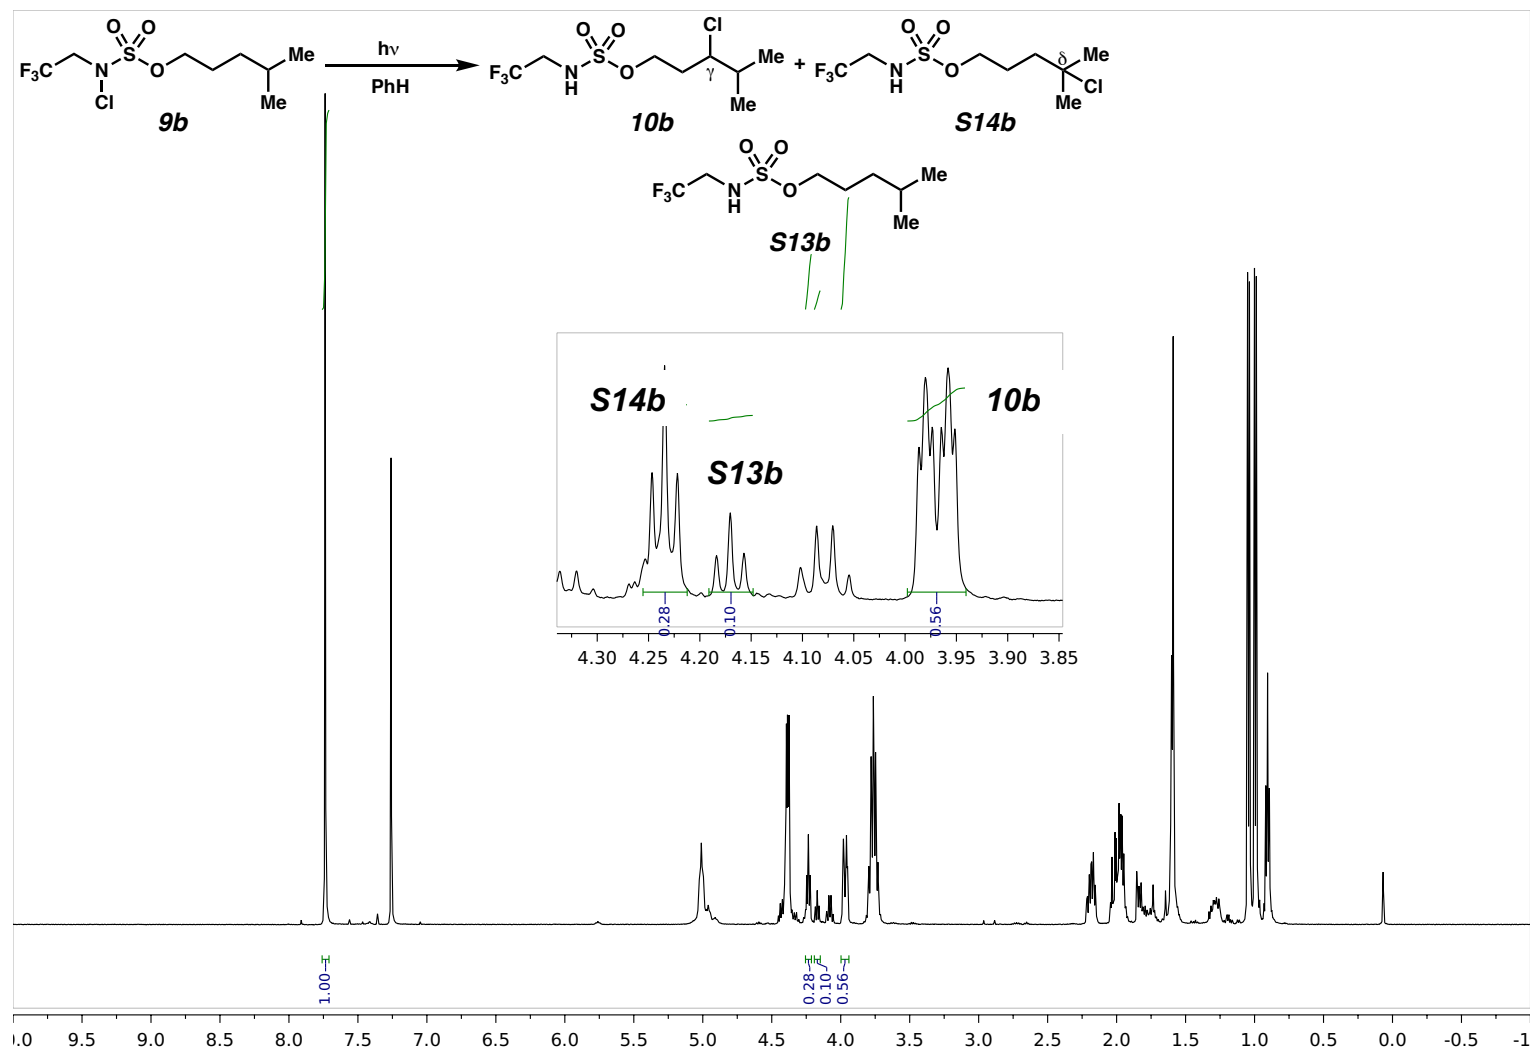

Crude  $^1\text{H}$  NMR (500 MHz,  $\text{CDCl}_3$ , 25s relaxation delay) for chlorine-transfer reaction of *N*-chlorosulfamate **9b**

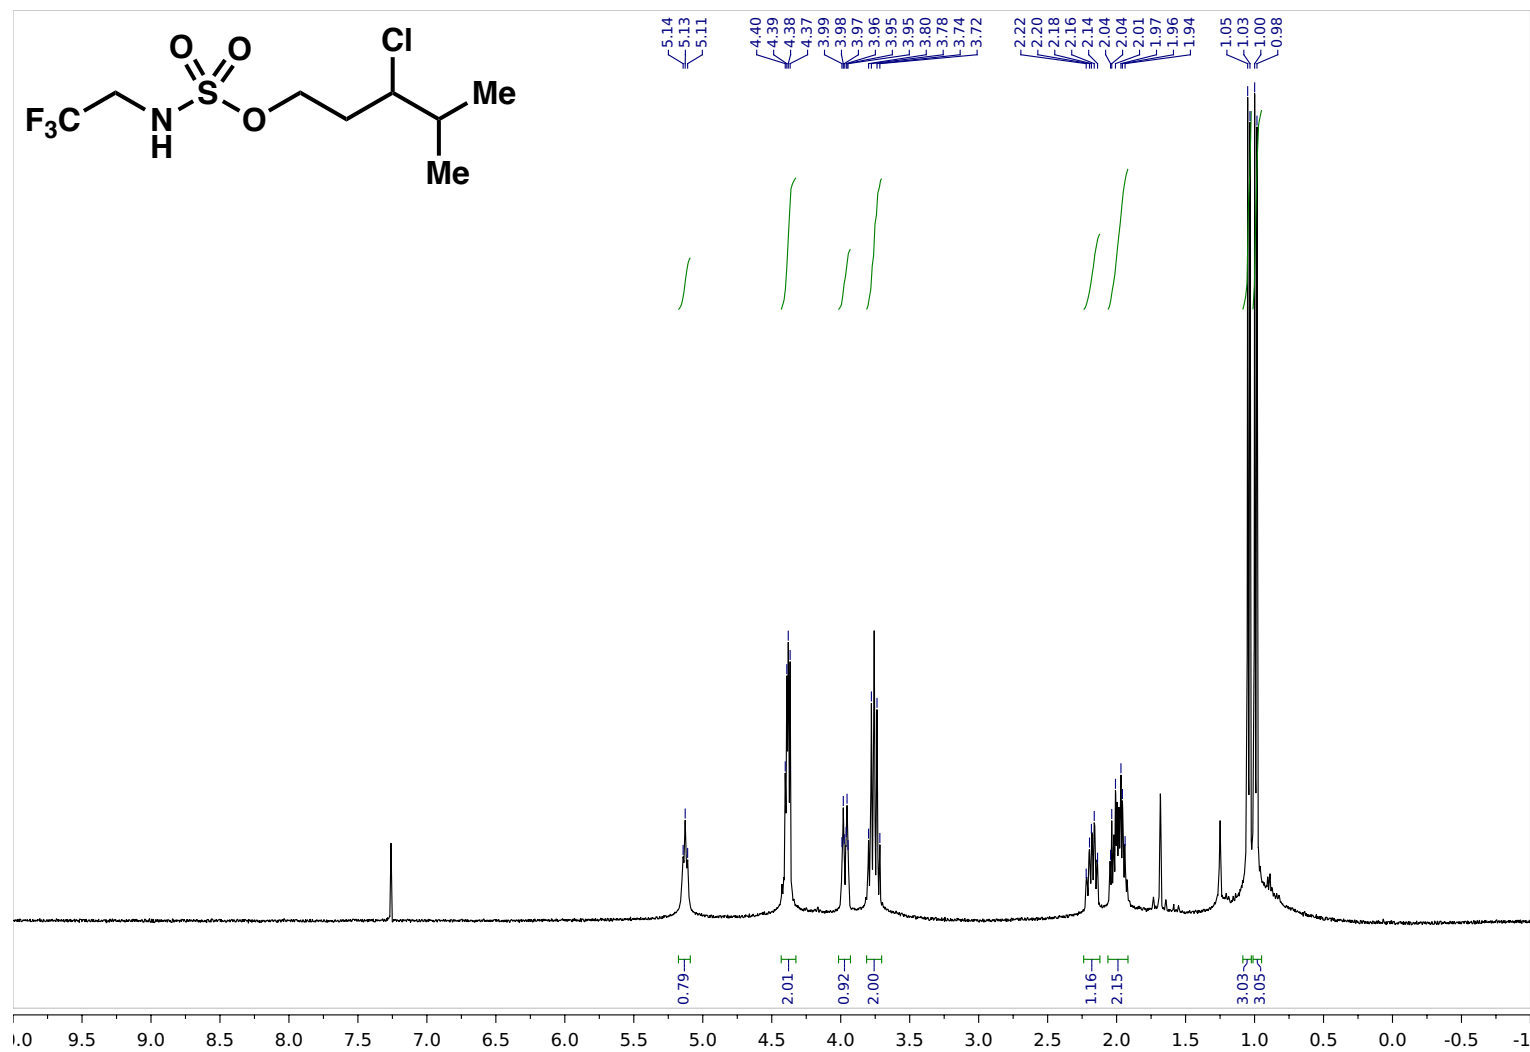

<sup>1</sup>H NMR (400 MHz, CDCl<sub>3</sub>) for 3-chloro-4-methylpentyl (2,2,2-trifluoroethyl)sulfamate (**10b**)

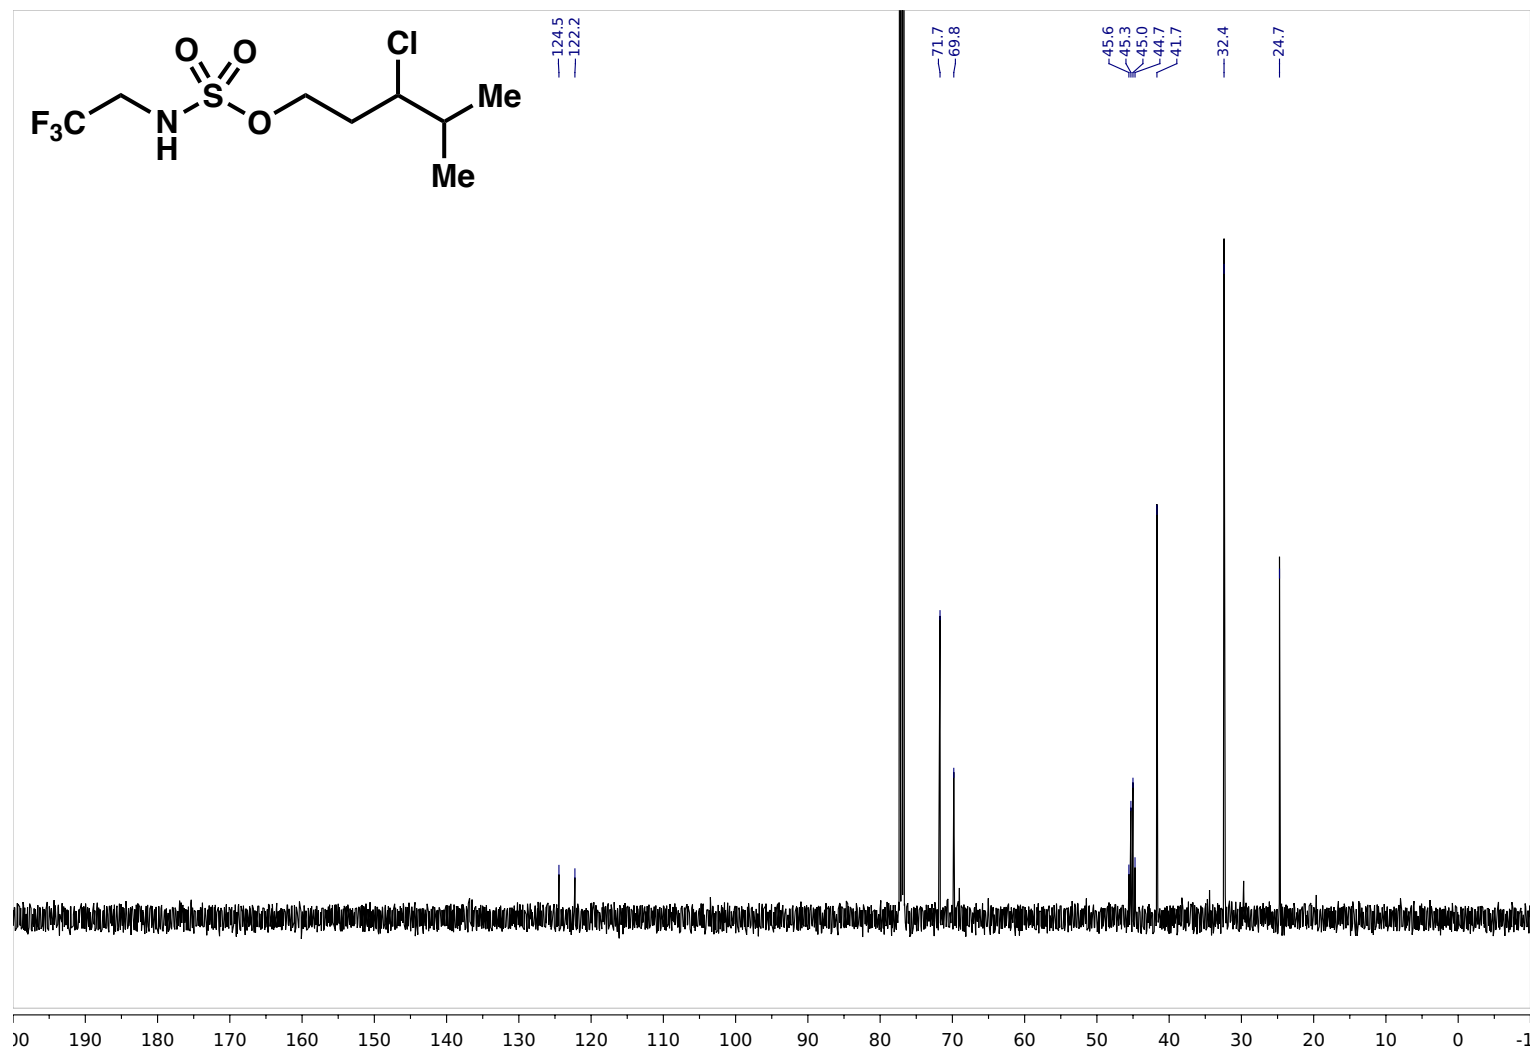

<sup>13</sup>C NMR (126 MHz, CDCl<sub>3</sub>) for 3-chloro-4-methylpentyl (2,2,2-trifluoroethyl)sulfamate (**10b**)

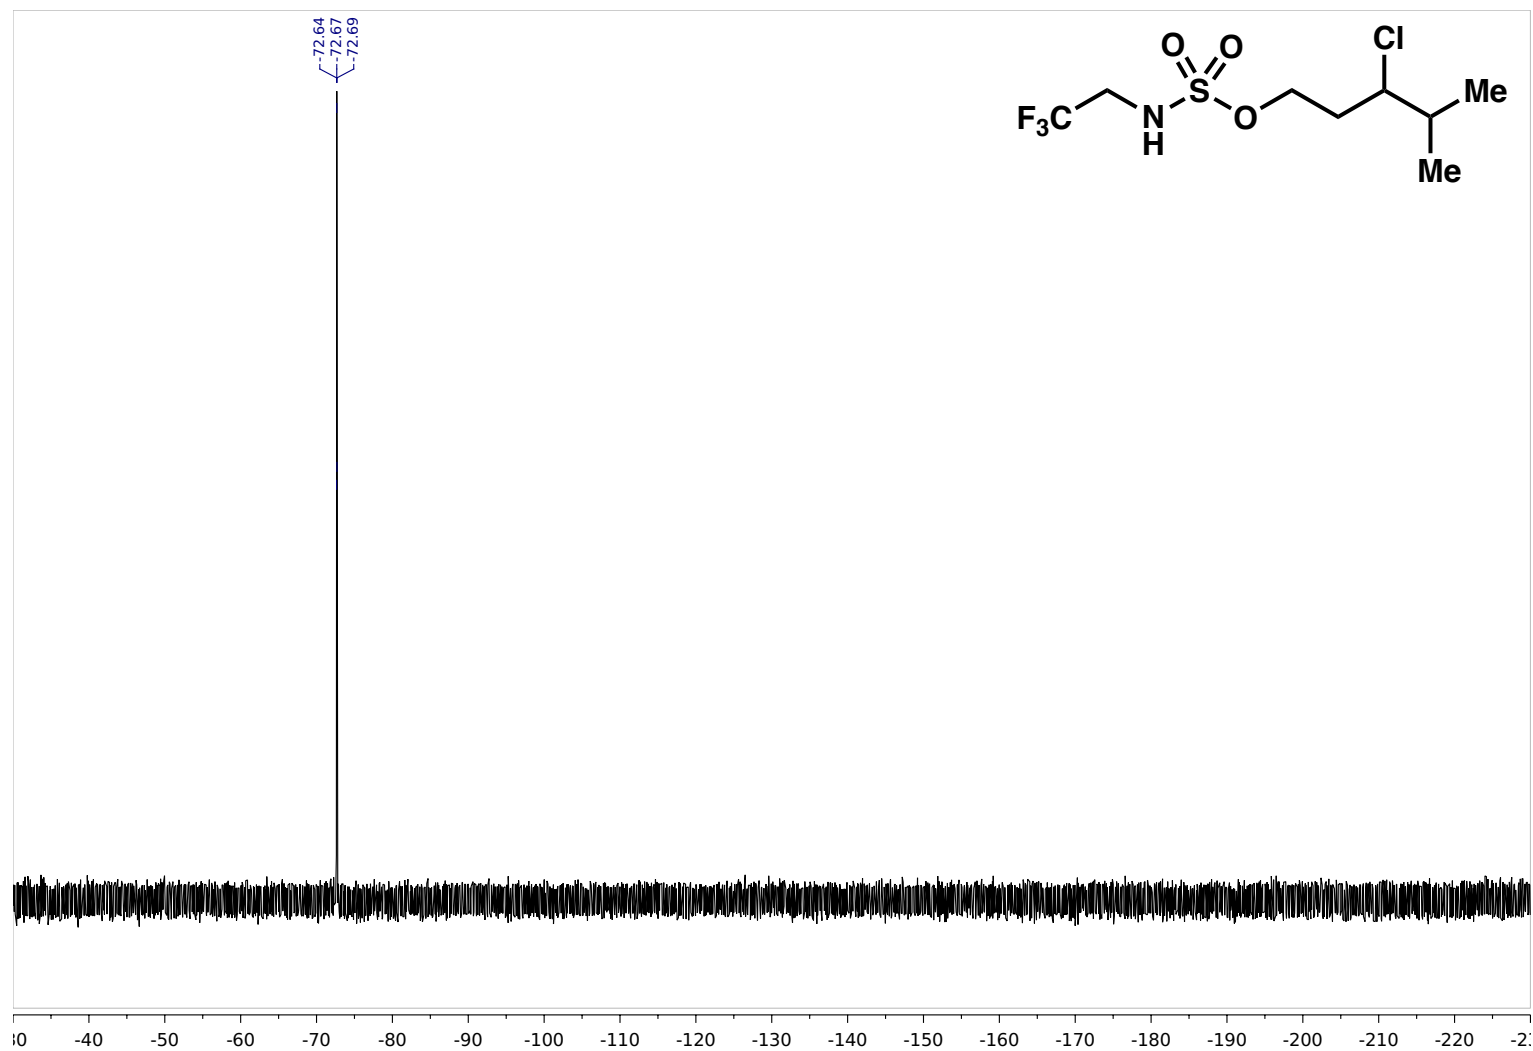

$^{19}\text{F}$  NMR (376 MHz,  $\text{CDCl}_3$ ) for 3-chloro-4-methylpentyl (2,2,2-trifluoroethyl)sulfamate (**10b**)



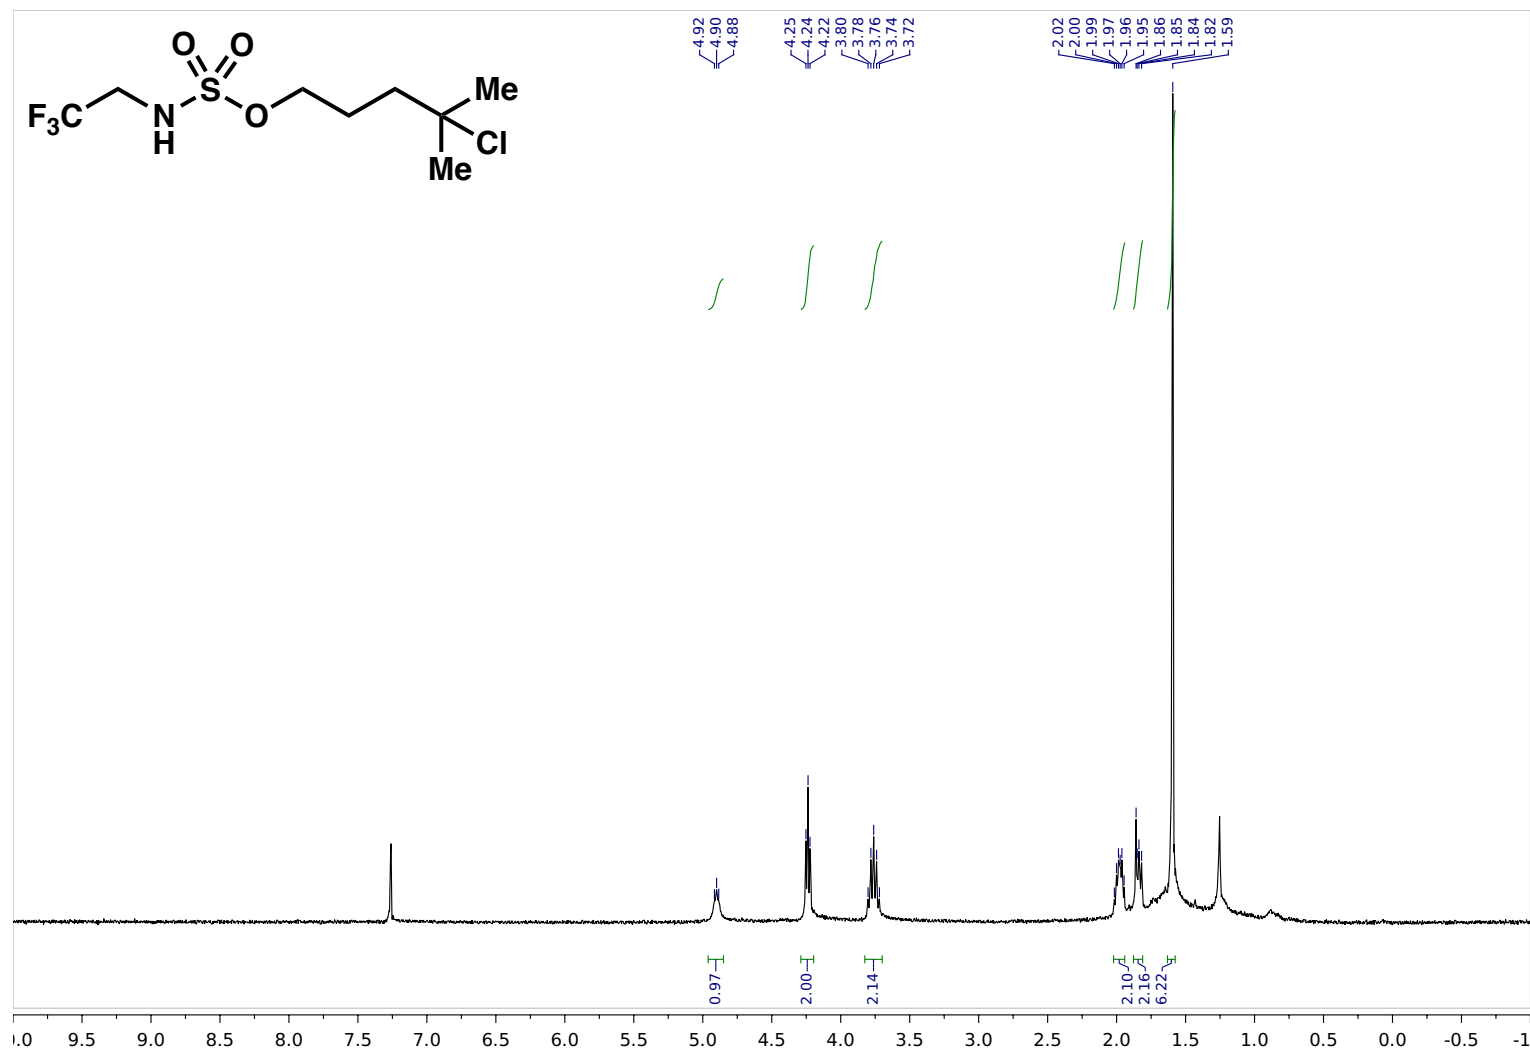

<sup>1</sup>H NMR (400 MHz, CDCl<sub>3</sub>) for 4-chloro-4-methylpentyl (2,2,2-trifluoroethyl)sulfamate (S14b)

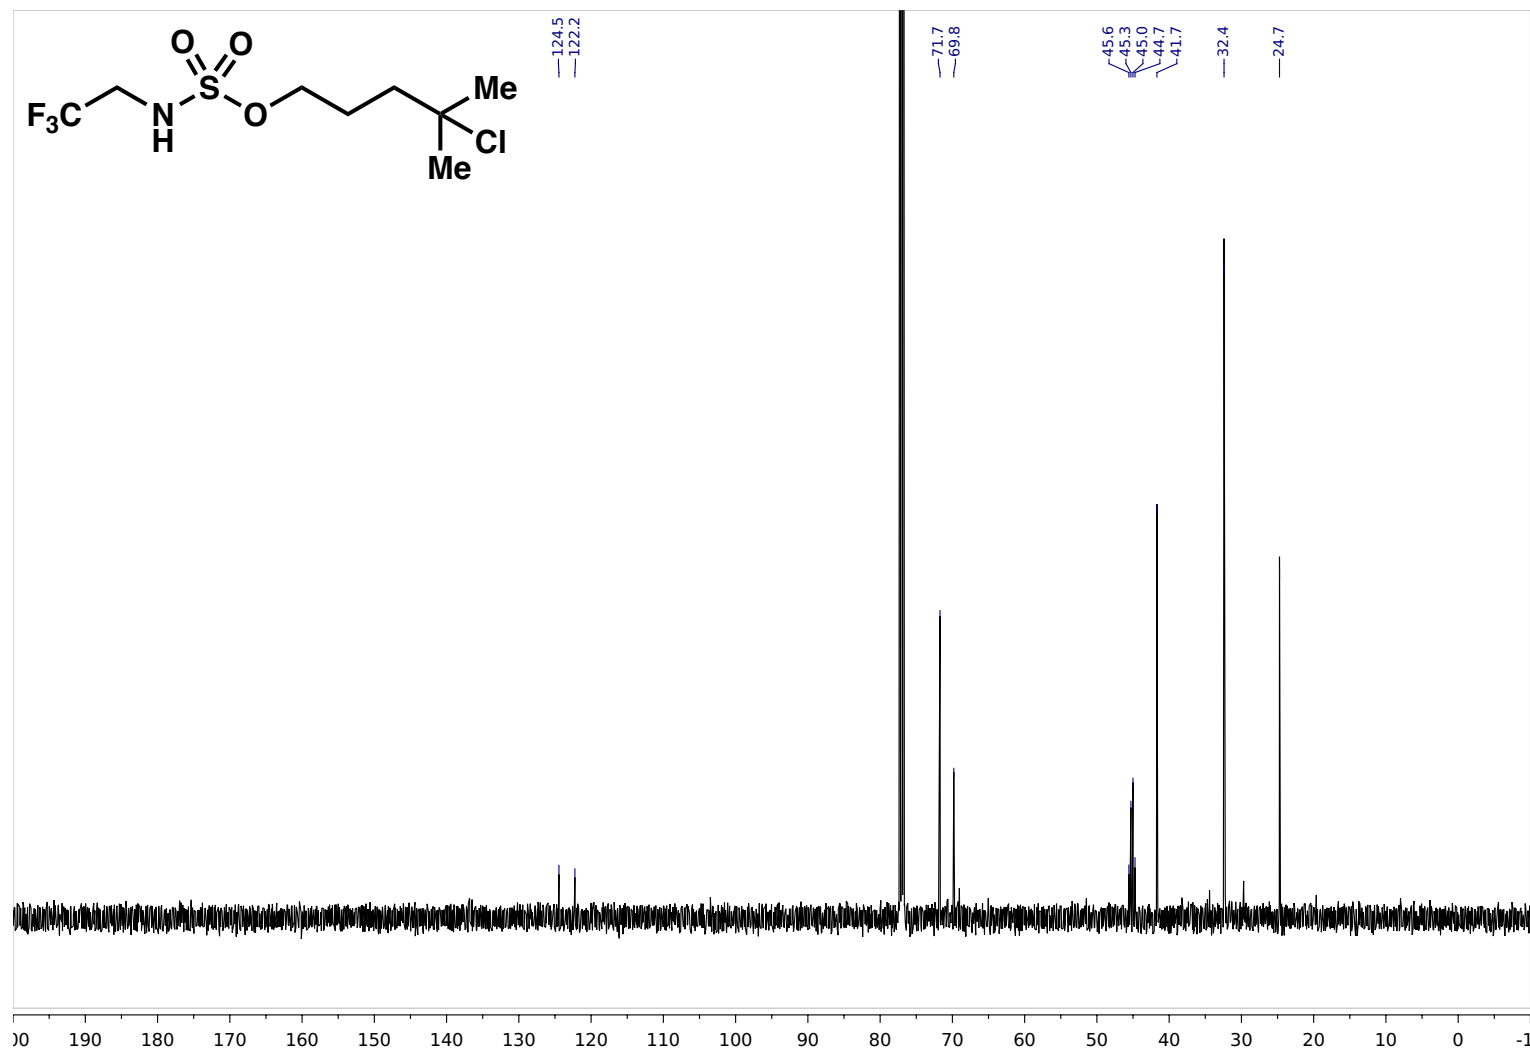

<sup>13</sup>C NMR (126 MHz, CDCl<sub>3</sub>) for 4-chloro-4-methylpentyl (2,2,2-trifluoroethyl)sulfamate (S14b)

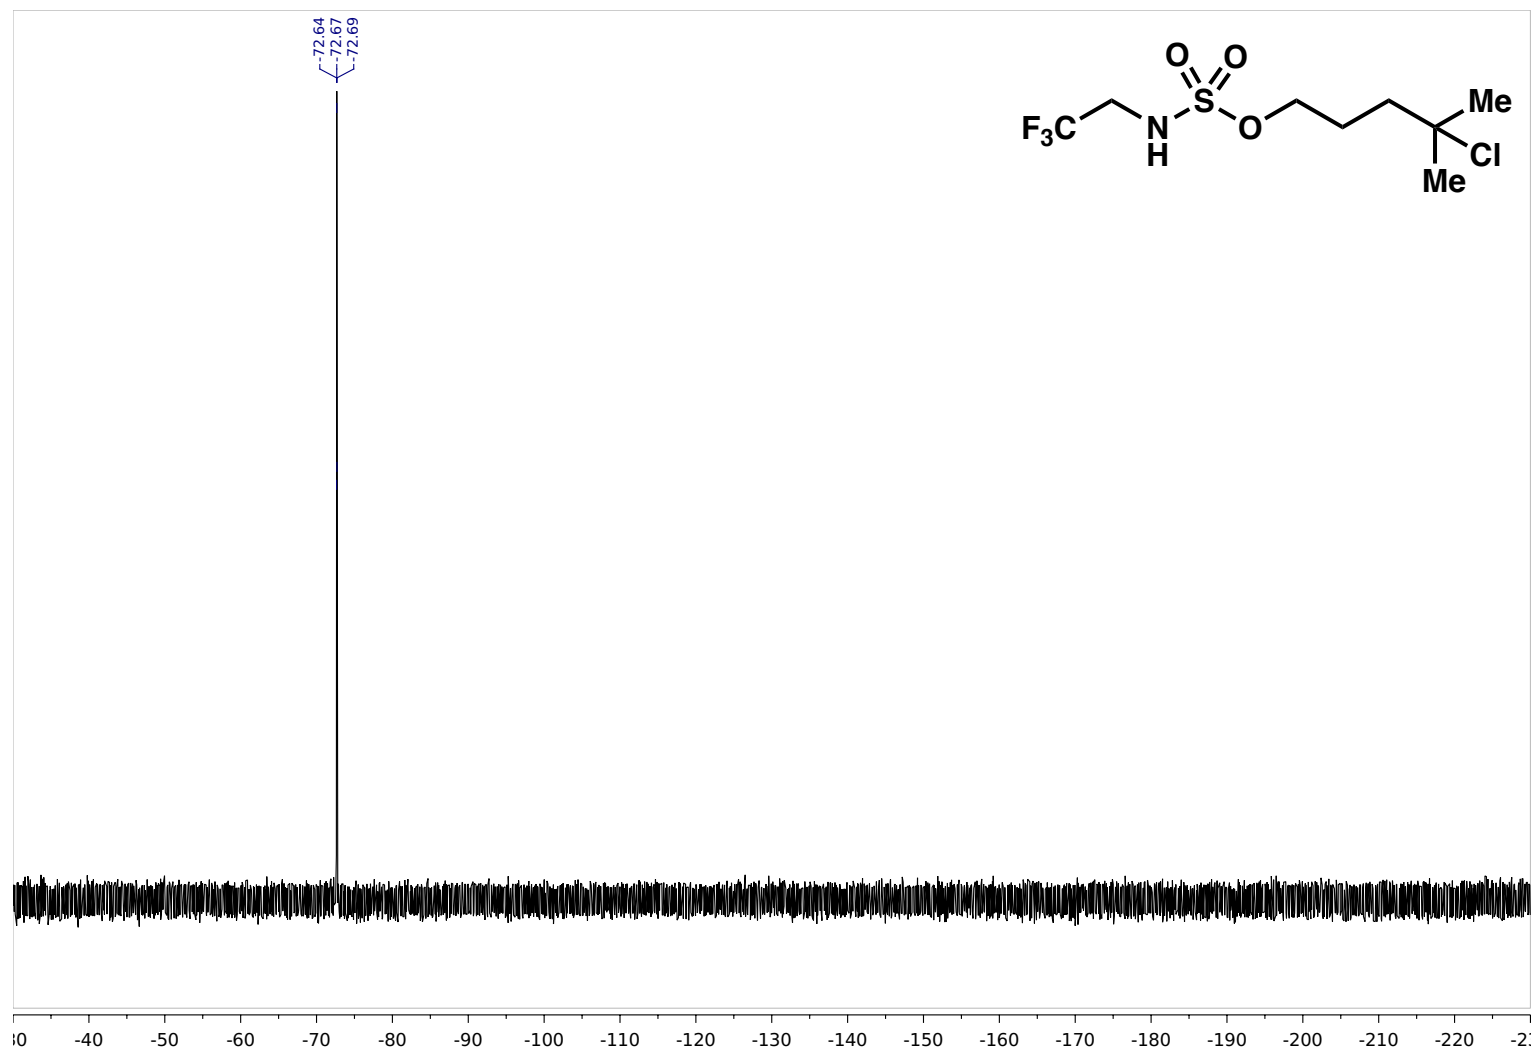

$^{19}\text{F}$  NMR (376 MHz,  $\text{CDCl}_3$ ) for 4-chloro-4-methylpentyl (2,2,2-trifluoroethyl)sulfamate (S14b)

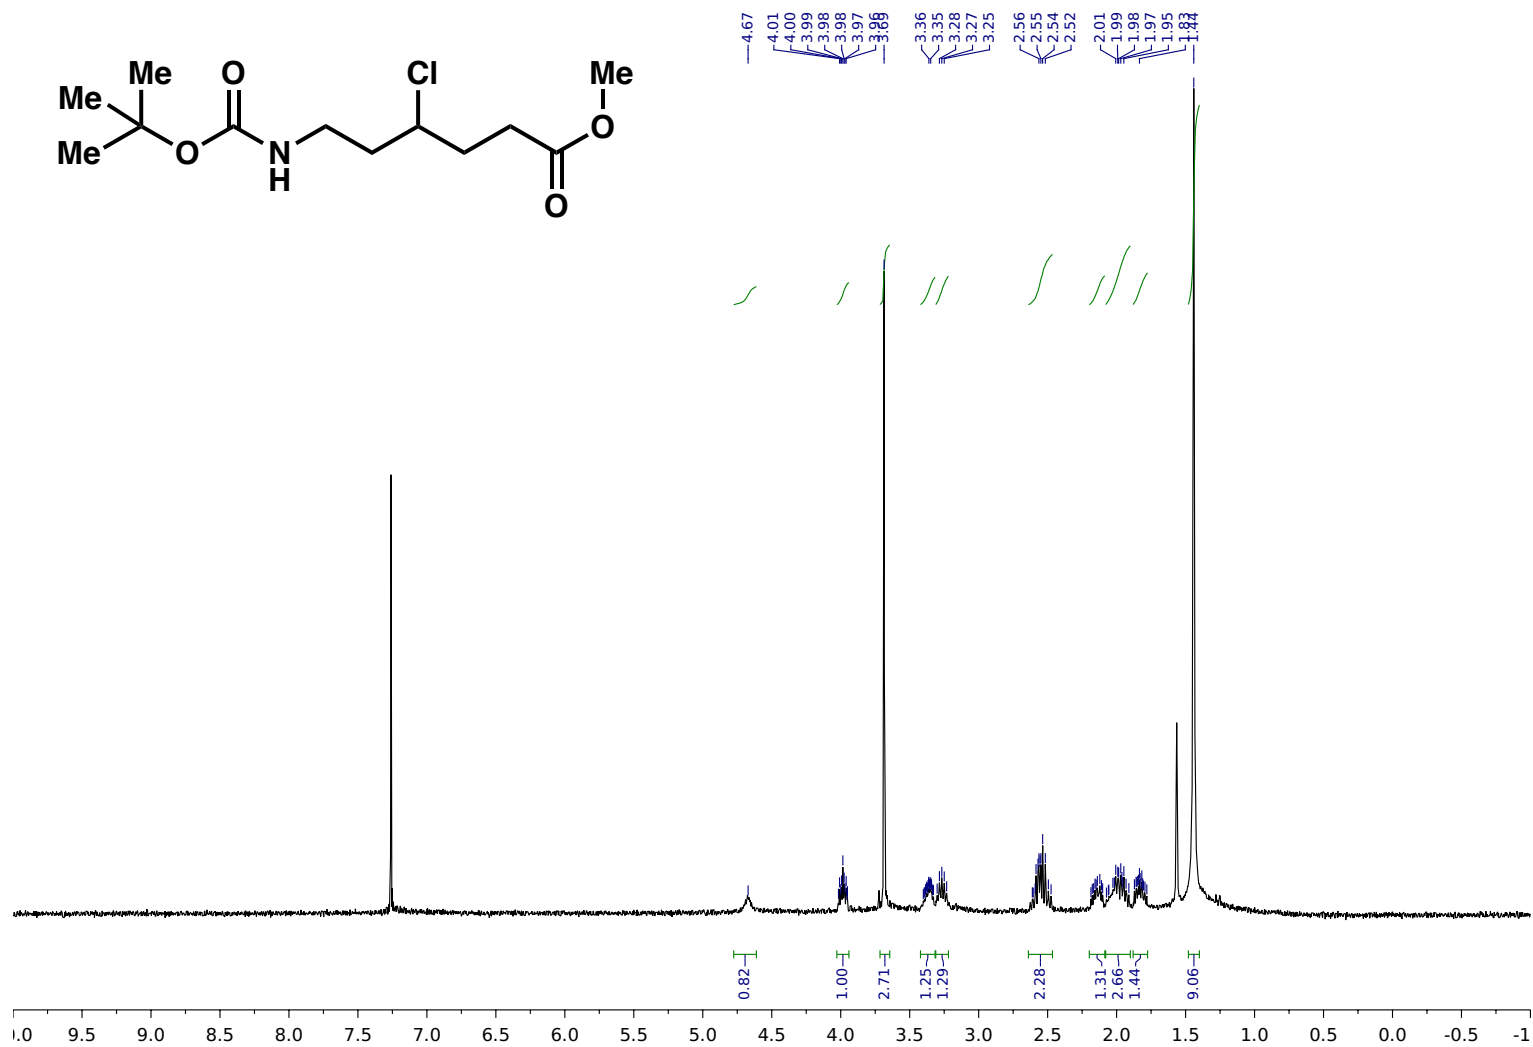

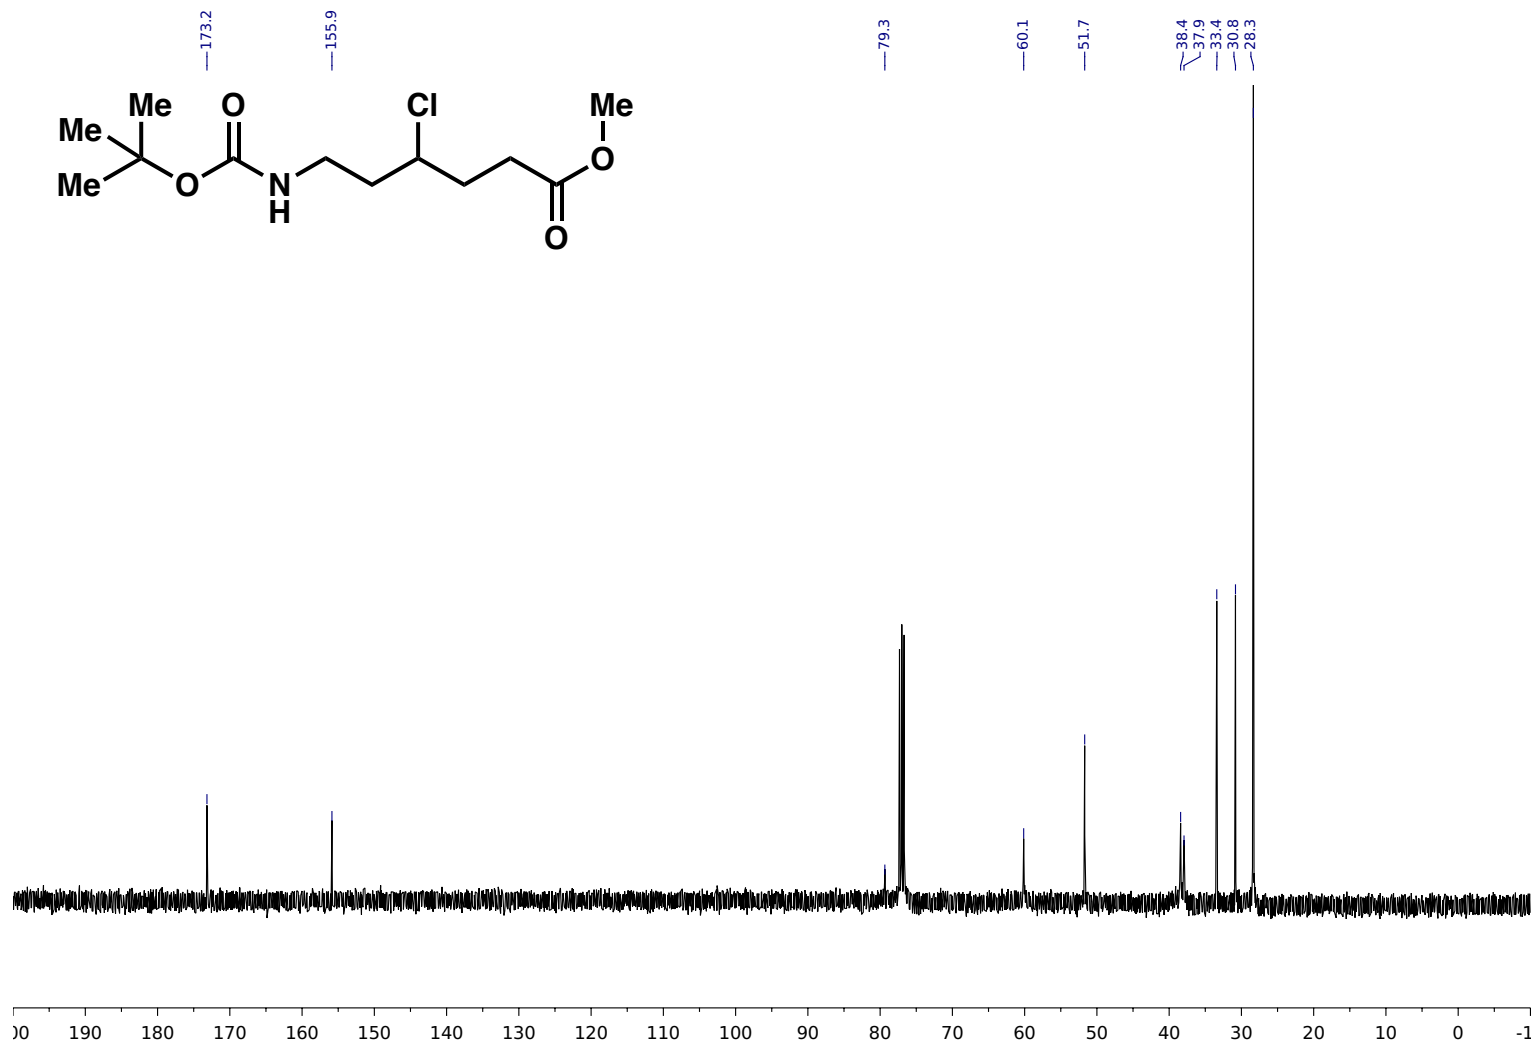

$^{13}\text{C}$  NMR (101 MHz,  $\text{CDCl}_3$ ) for methyl 6-((*tert*-butoxycarbonyl)amino)-4-chlorohexanoate (S15k)

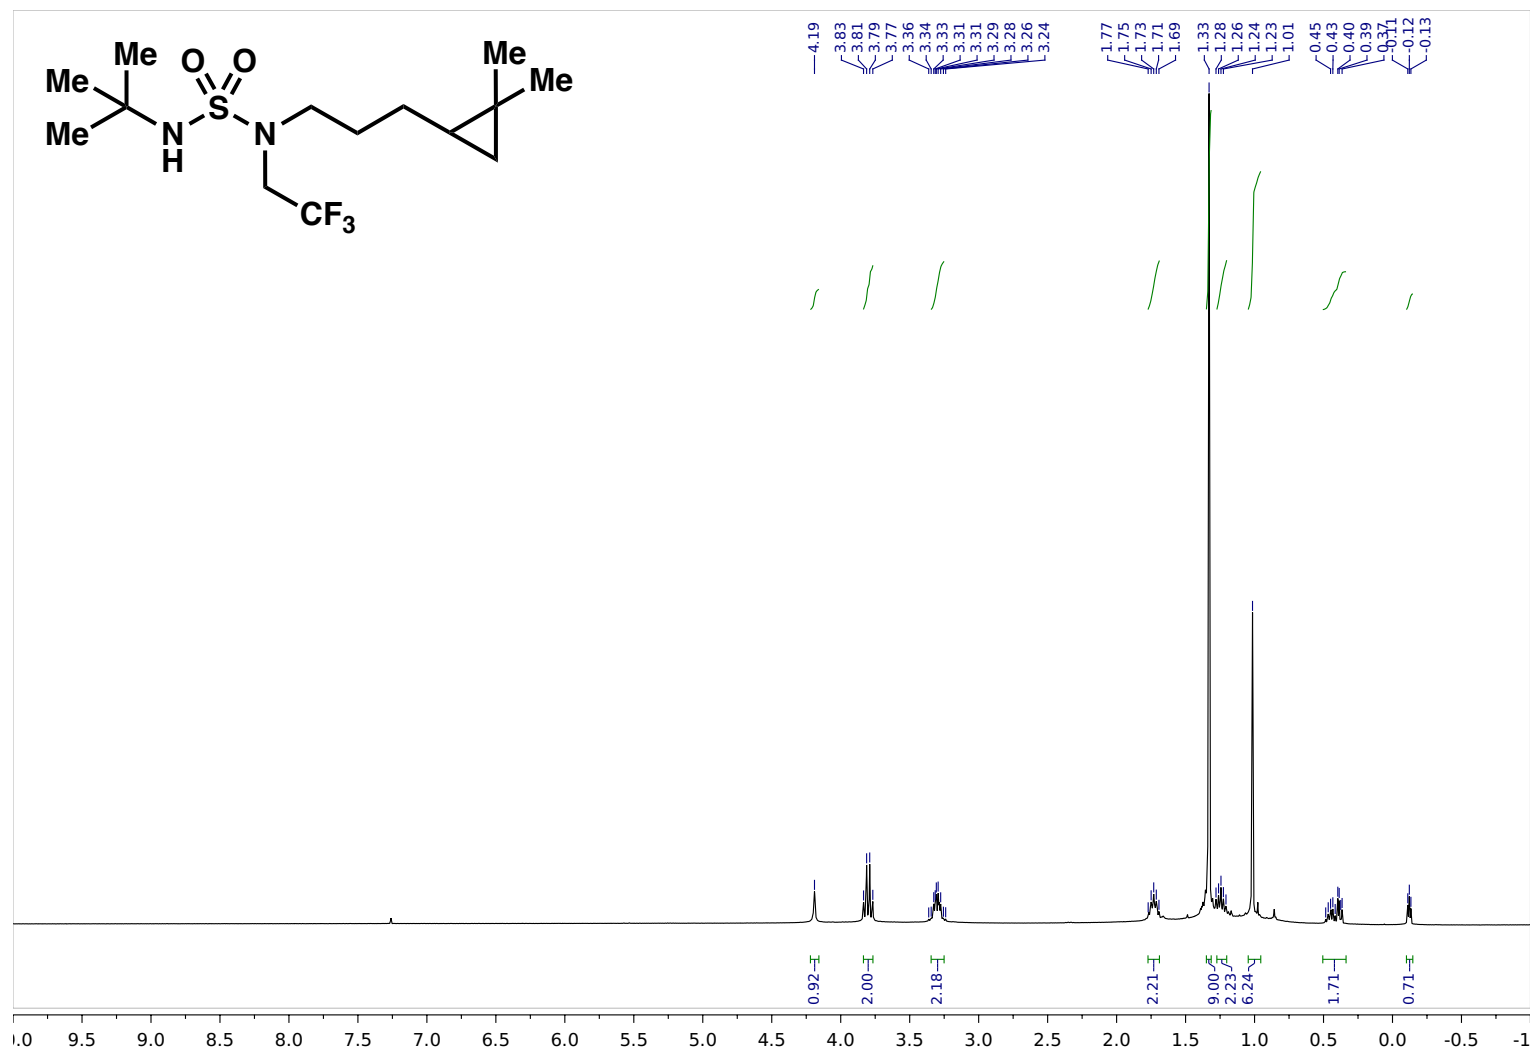

<sup>1</sup>H NMR (400 MHz, CDCl<sub>3</sub>) for *N*-*tert*-butyl-*N'*-(3-(2,2-dimethylcyclopropyl)propan-1-yl)-*N'*-(2,2,2-trifluoro)ethyl sulfamide (S8s)

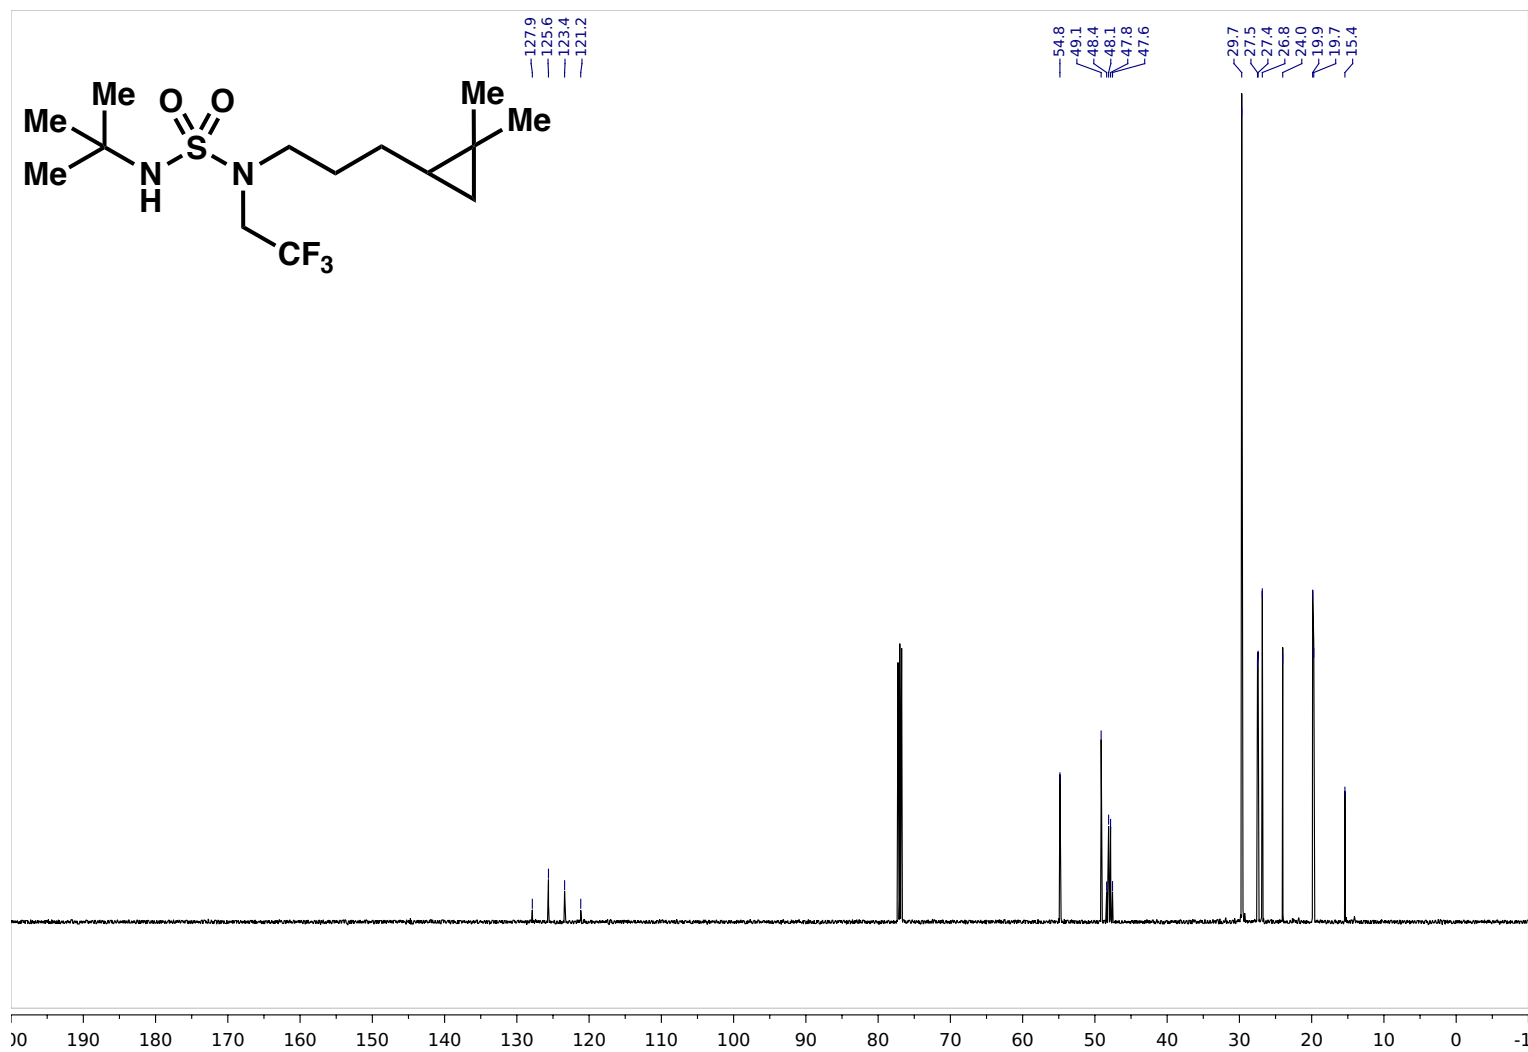

<sup>13</sup>C NMR (126 MHz, CDCl<sub>3</sub>) for *N*-*tert*-butyl-*N'*-(3-(2,2-dimethylcyclopropyl)propan-1-yl)-*N'*-(2,2,2-trifluoro)ethyl sulfamide (S8s)

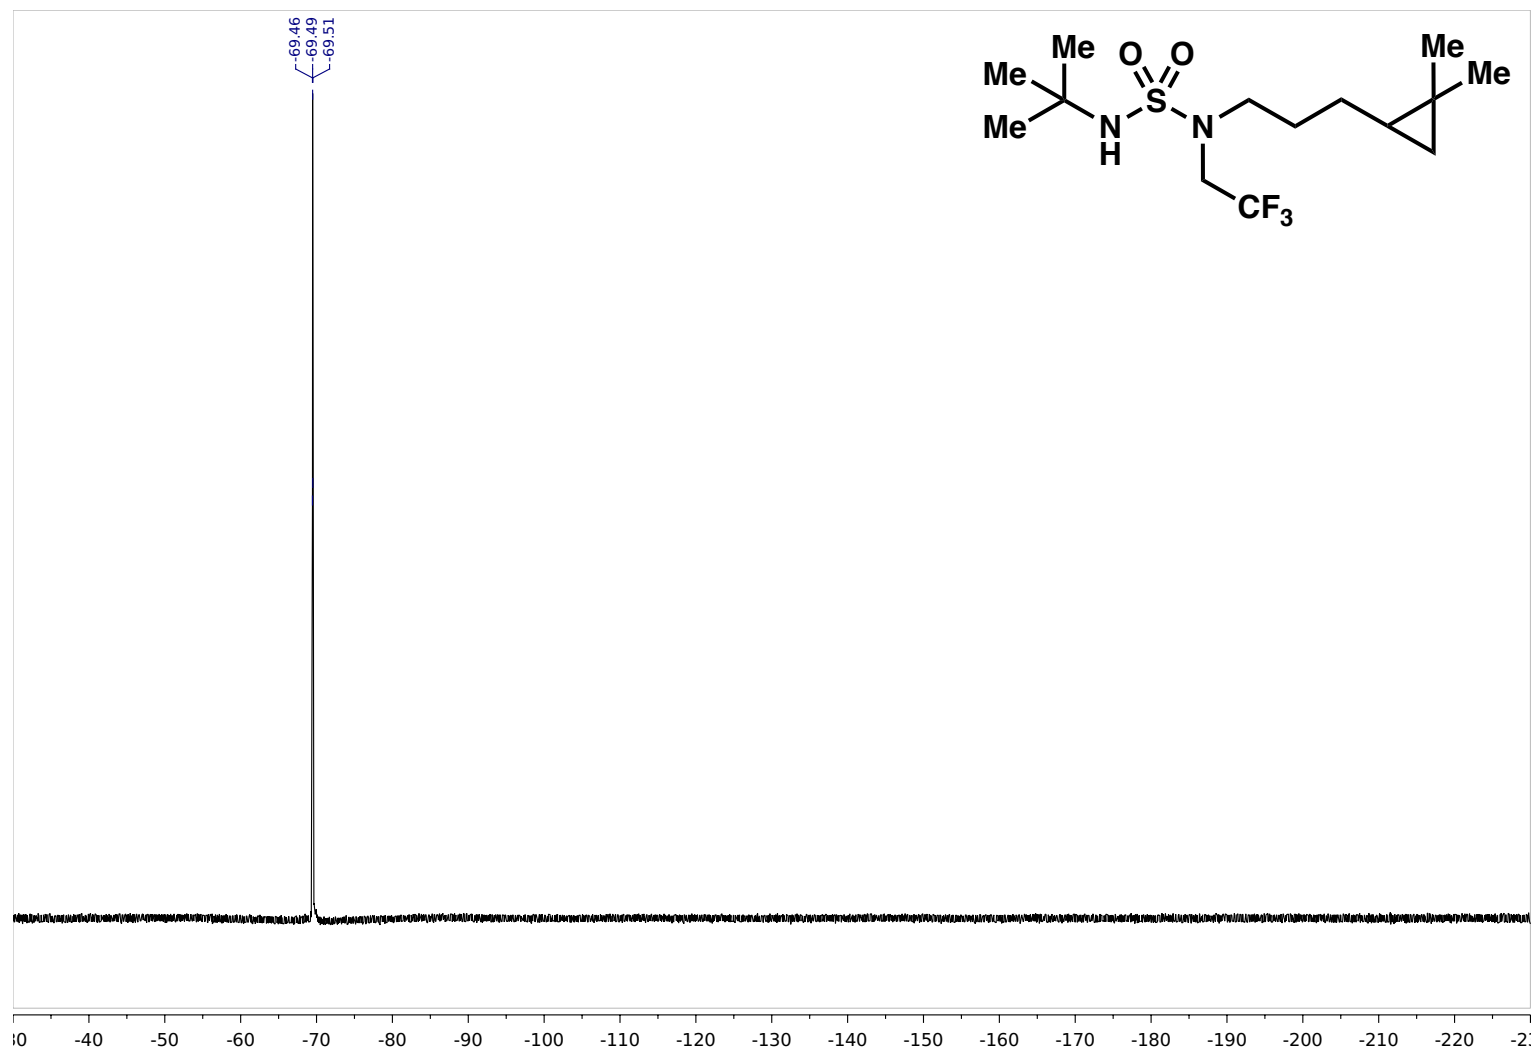

$^{19}\text{F}$  NMR (376 MHz,  $\text{CDCl}_3$ ) for *N*-*tert*-butyl-*N'*-(3-(2,2-dimethylcyclopropyl)propan-1-yl)-*N'*-(2,2,2-trifluoroethyl) sulfamide (S8s)



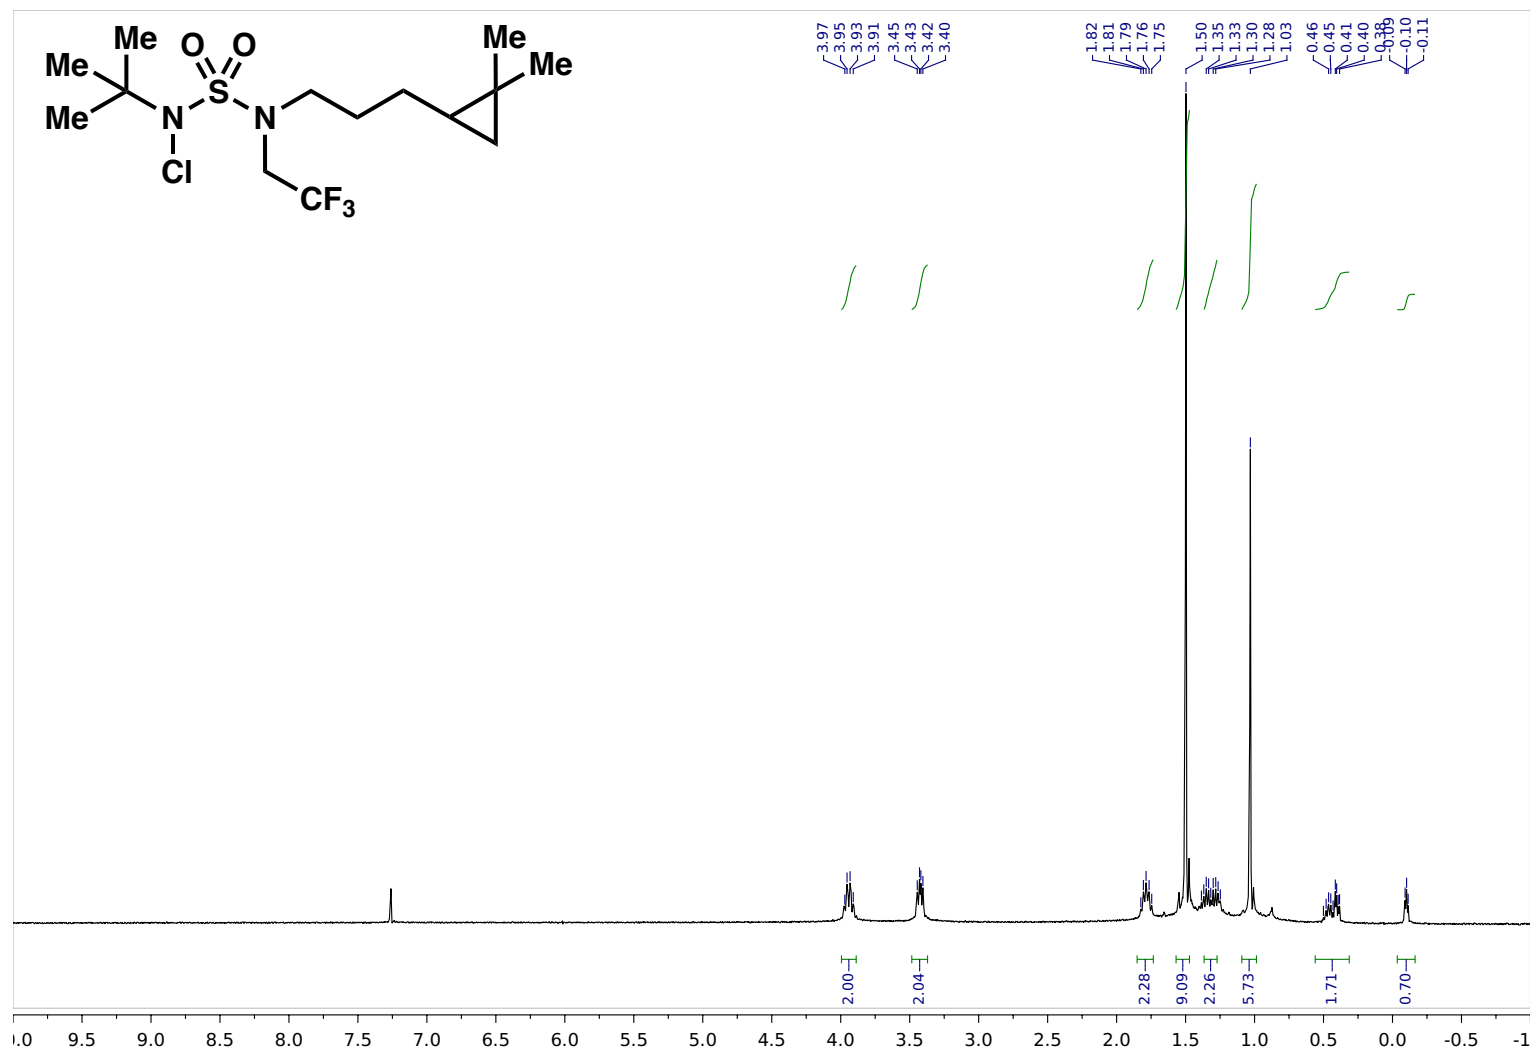

<sup>1</sup>H NMR (400 MHz, CDCl<sub>3</sub>) for *N-tert-butyl-N-chloro-N'-(3-(2,2-dimethylcyclopropyl)propan-1-yl)-N'-(2,2,2-trifluoro)ethyl sulfamide (1s)*

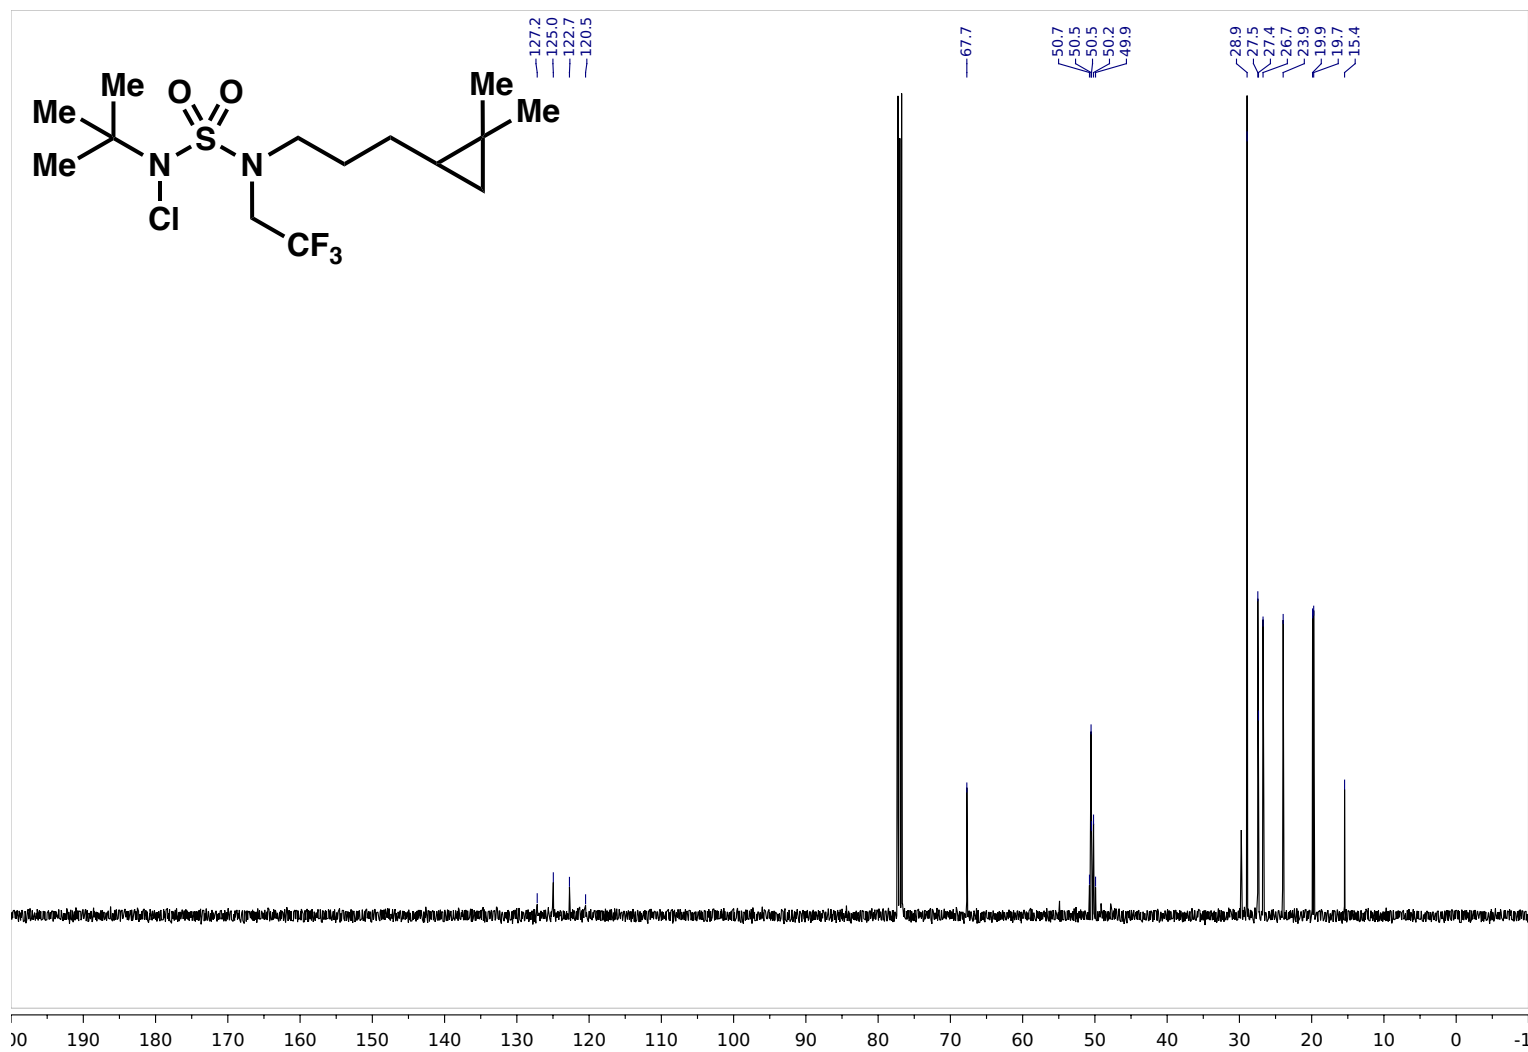

<sup>13</sup>C NMR (126 MHz, CDCl<sub>3</sub>) for *N*-*tert*-butyl-*N*-chloro-*N'*-(3-(2,2-dimethylcyclopropyl)propan-1-yl)-*N'*-(2,2,2-trifluoro)ethyl sulfamide (**1s**)

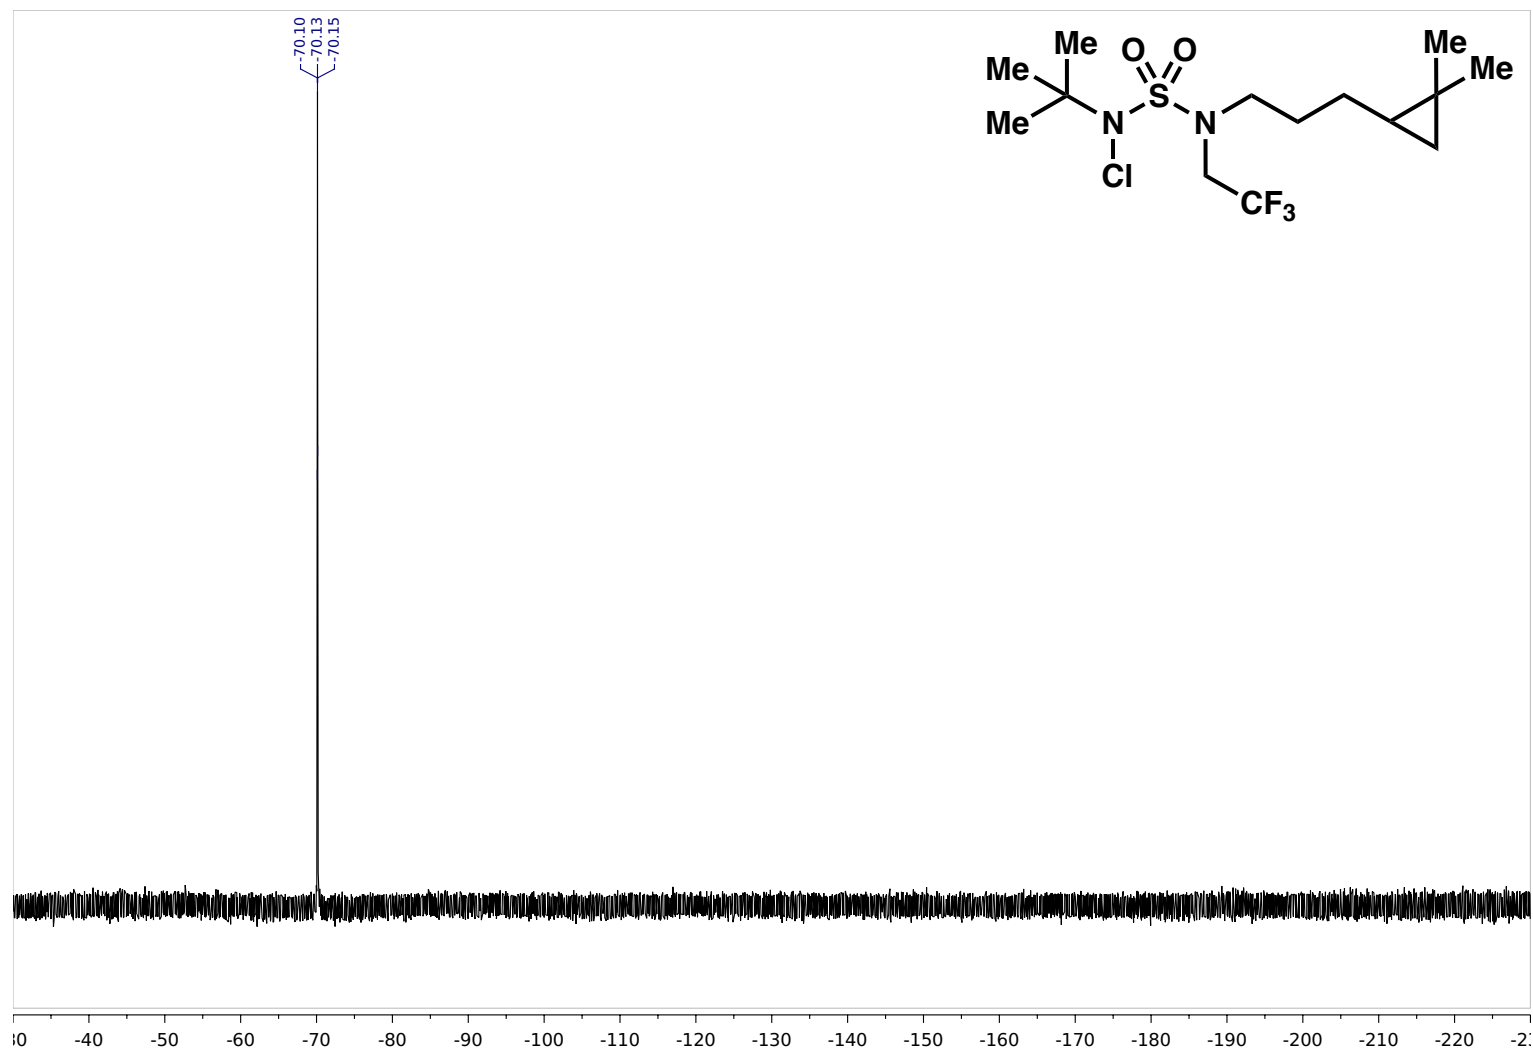

$^{19}\text{F}$  NMR (376 MHz,  $\text{CDCl}_3$ ) for *N*-*tert*-butyl-*N*-chloro-*N'*-(3-(2,2-dimethylcyclopropyl)propan-1-yl)-*N'*-(2,2,2-trifluoro)ethyl sulfamide (**1s**)

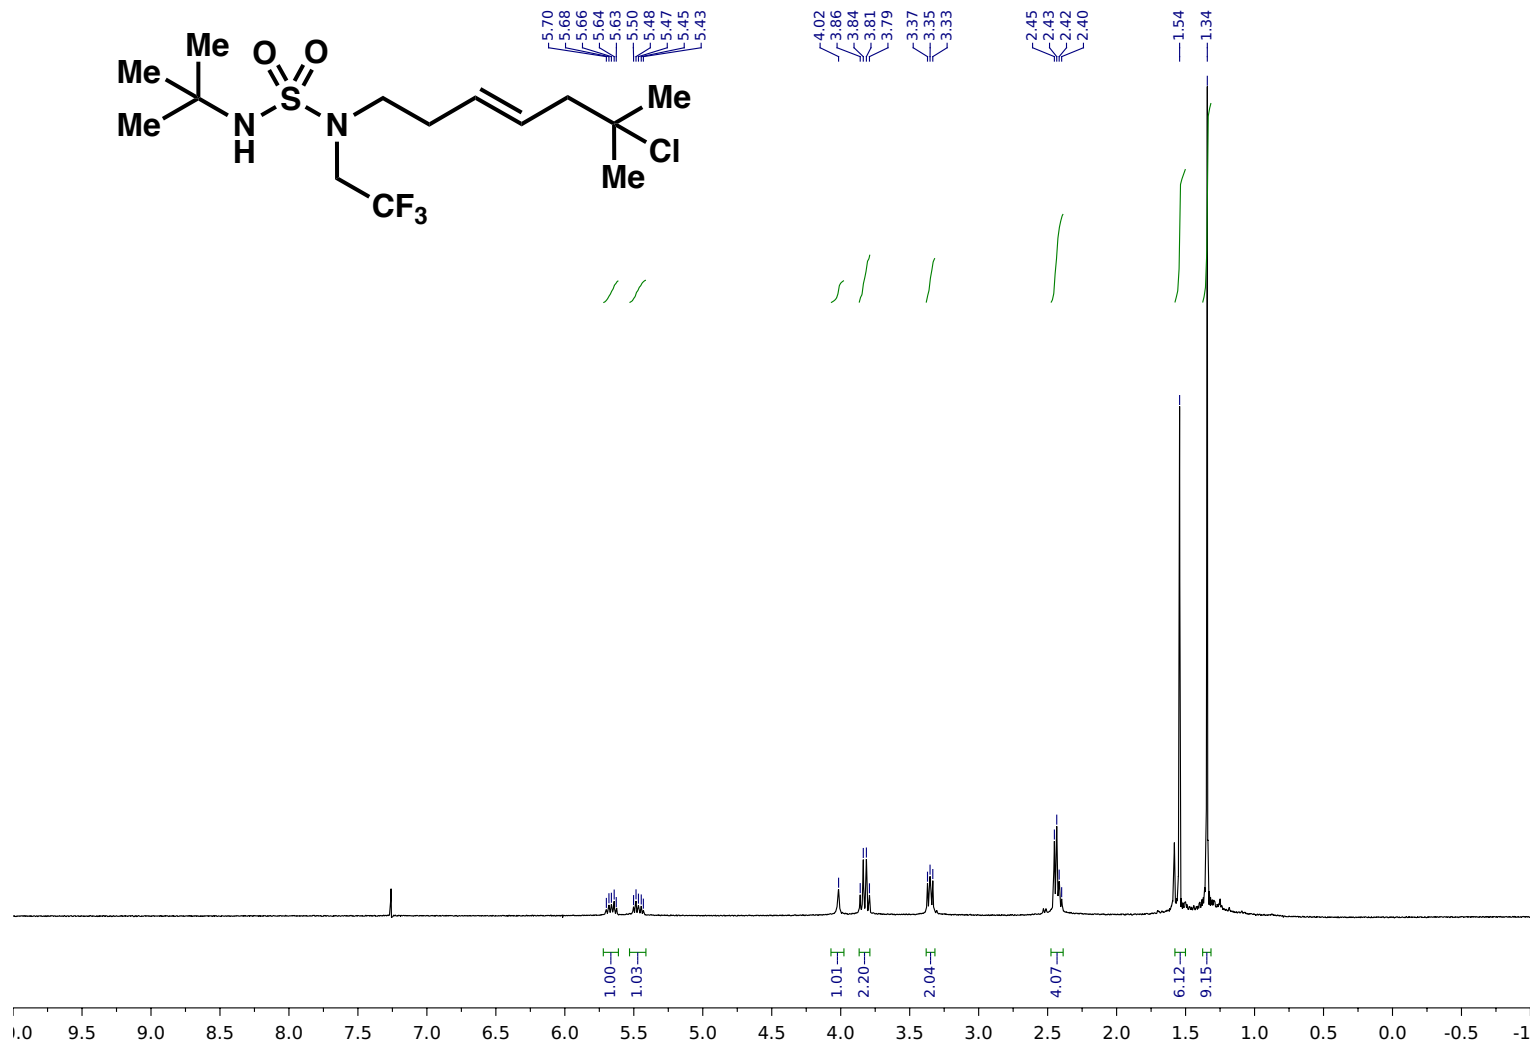

<sup>1</sup>H NMR (400 MHz, CDCl<sub>3</sub>) for *N*-*tert*-butyl-*N'*-(6-chloro-6-methylhept-3-en-1-yl)-*N'*-(2,2,2-trifluoro)ethyl sulfamide (**12s**)

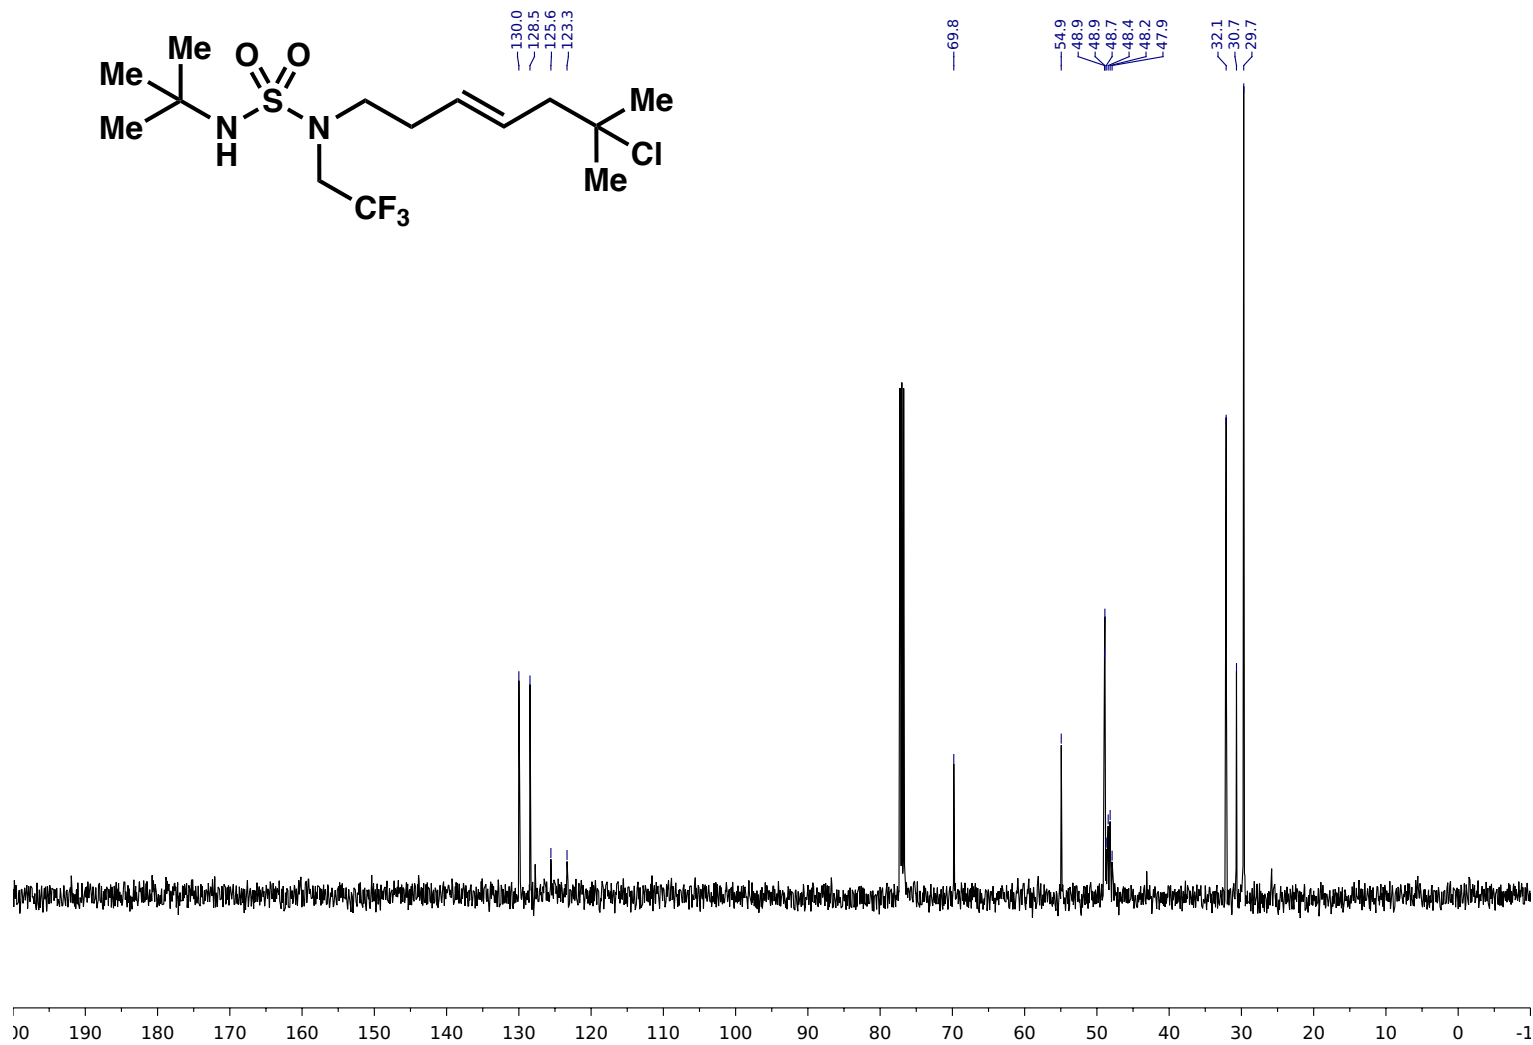

$^{13}\text{C}$  NMR (126 MHz,  $\text{CDCl}_3$ ) for *N*-*tert*-butyl-*N'*-(6-chloro-6-methylhept-3-en-1-yl)-*N'*-(2,2,2-trifluoro)ethyl sulfamide (**12s**)

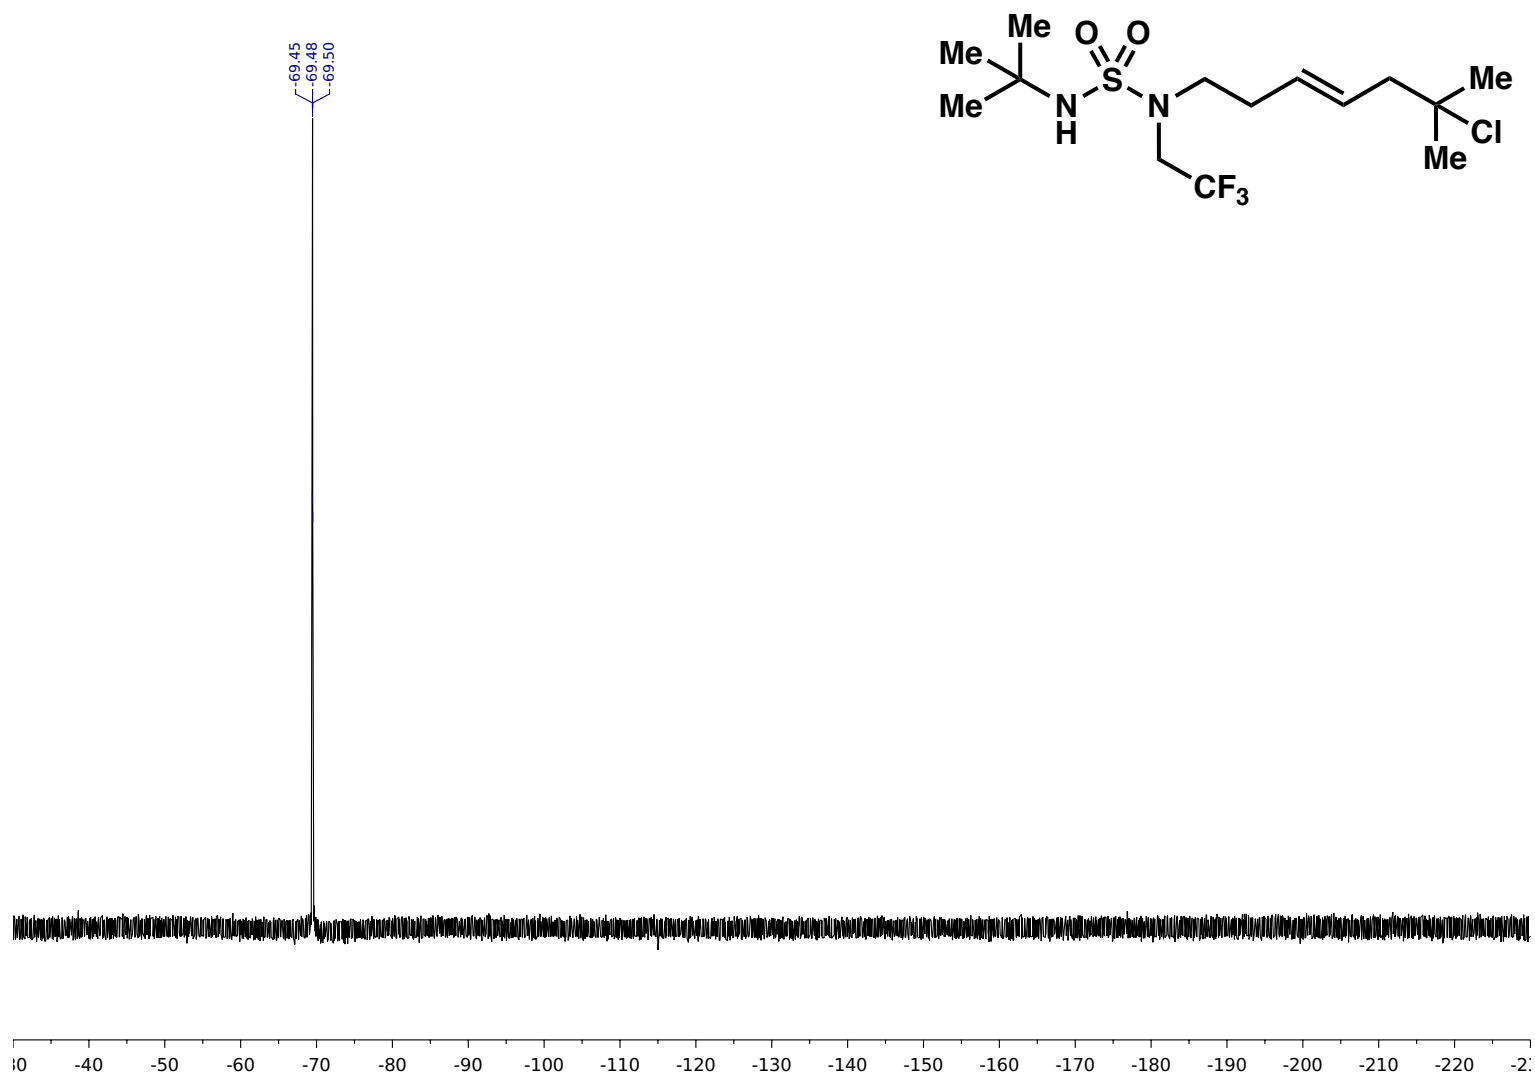

$^{19}\text{F}$  NMR (376 MHz,  $\text{CDCl}_3$ ) for *N*-*tert*-butyl-*N'*-(6-chloro-6-methylhept-3-en-1-yl)-*N'*-(2,2,2-trifluoro)ethyl sulfamide (**12s**)
